# Supplementary material for: Functional Annotation of the Transcriptome of the Pig, Sus scrofa, Based Upon Network Analysis of an RNAseq Transcriptional Atlas
Source: PubMed Central journal article supplement (PMC7034361; doi:10.3389/fgene.2019.01355), 2020-02-14
Supplement: Presentation_1.pdf [file Presentation_1.pdf]

# Functional annotation of the transcriptome of the pig, *Sus scrofa*, based upon network analysis of an RNAseq transcriptional atlas.

Kim M Summers, Stephen J Bush, Chunlei Wu, Andrew I. Su, Charity Muriuki, Emily L Clark, Heather A. Finlayson, Lel Eory, Lindsey A Waddell, Richard Talbot, Alan L Archibald, David A Hume

## Supplementary Figures

### Figure S1. Correlation graph settings for network analysis with Graphia Professional

Figure S1A. Settings for the overall atlas.

Figure S1B. Settings for the analysis of liver samples.

Figure S1C. Settings for the analysis of central nervous system samples.

### Figure S2. Sample to sample networks

Figure S2A. Networks generated for the overall atlas.

Figure S2B. Analysis of liver samples.

Figure S2C. Analysis of central nervous system samples.

## References for Supplementary Figures

### Next Page

#### Figure S1. Correlation graph settings for network analysis with Graphia Professional

The correlation threshold for each gene-to-gene analysis was chosen to optimise the number of nodes and edges in order to generate meaningful clusters.

A. Settings for the overall atlas.

B. Settings for the analysis of liver samples.

C. Settings for the analysis of central nervous system samples.

**A**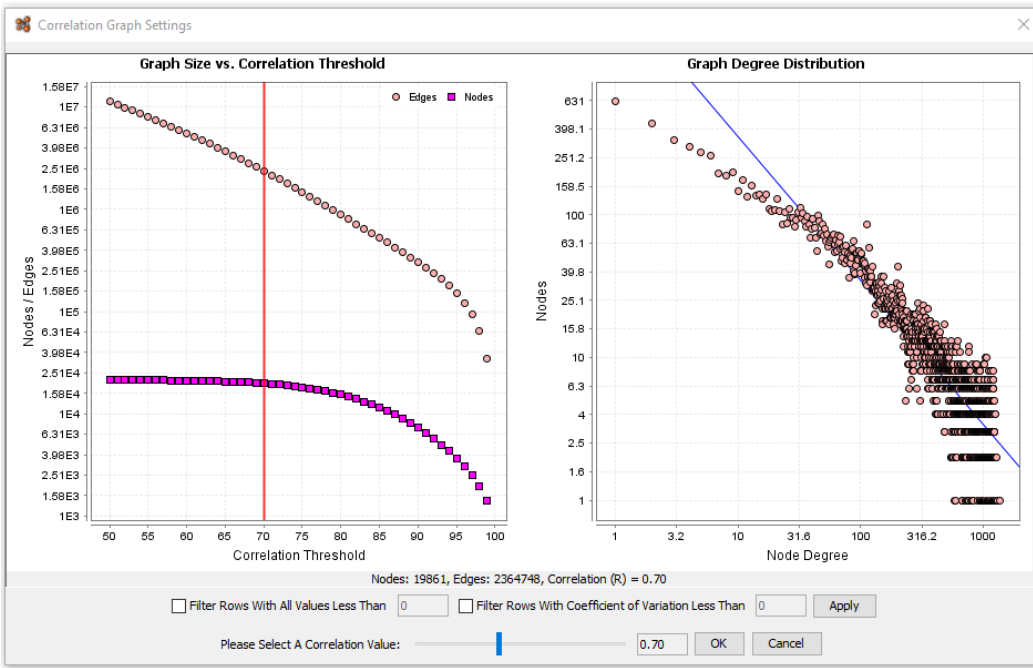**B**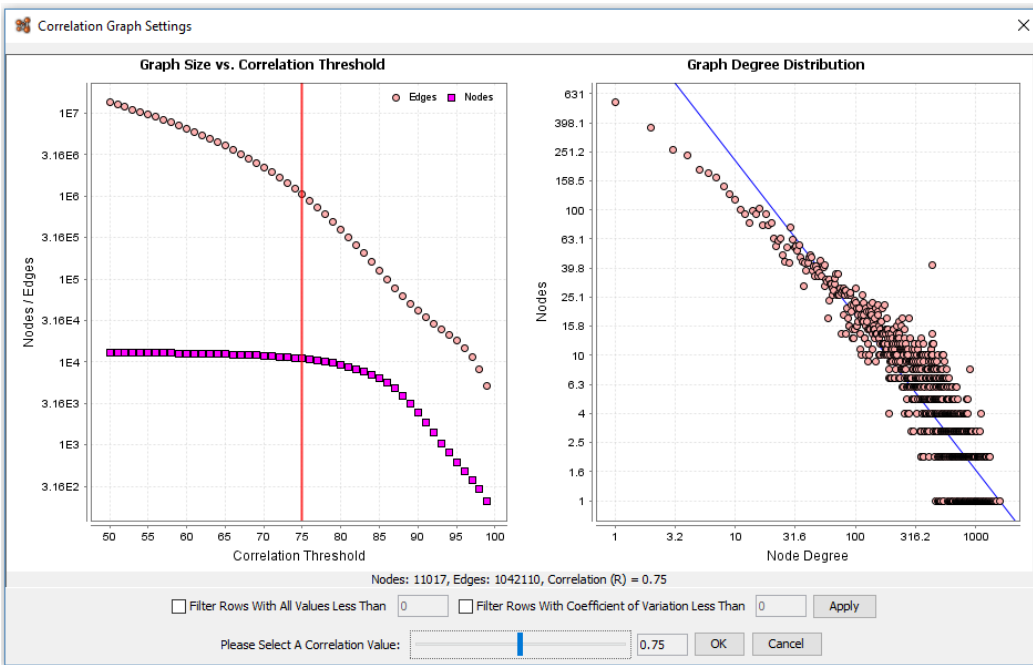**C**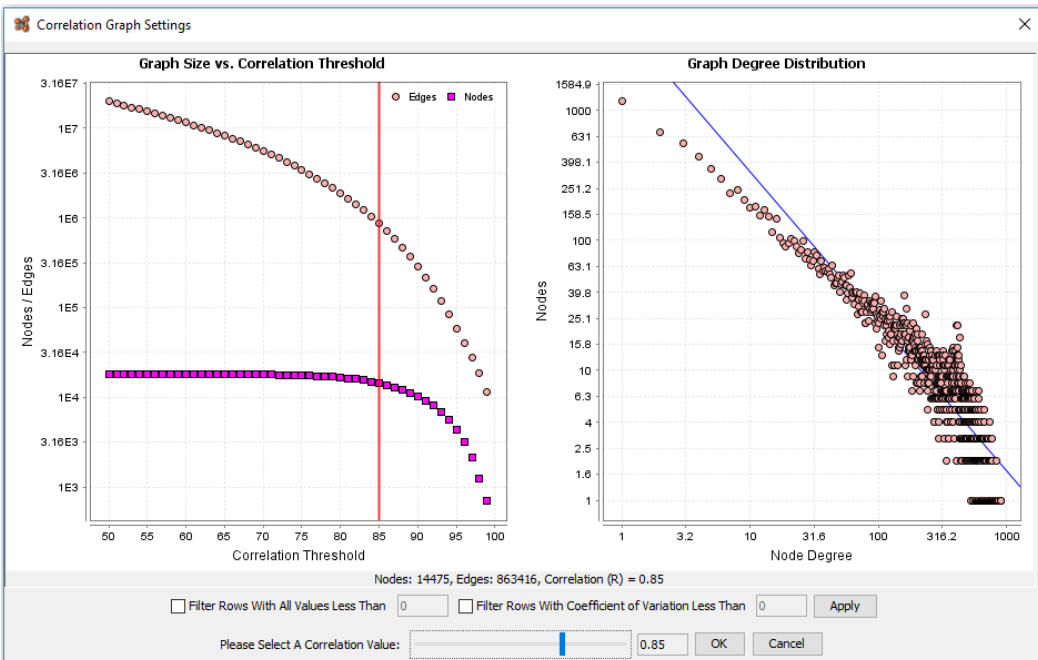

## Figure S2. Sample to sample networks

A. Networks generated for the overall atlas. Colours show the organ system of the samples. Upper panel shows the result for all nodes (samples) at  $R \geq 0.38$ ; lower panel shows the network at  $R \geq 0.85$ , which clusters samples of related origin together. Note that muscle, heart, spleen, liver and testis samples from BioProject PRJNA297855 are separated from the other samples of the same tissues. These samples are from a study of Guizhou minipigs which may be very different from the full sized breeds of the other samples.

B. Network generated for the liver analysis. Colours indicate the BioProject from which the samples were drawn.

C. Network generated for the central nervous system analysis.

### A. Overall atlas

| Node colour  | Organ system                |
|--------------|-----------------------------|
| Red          | Cardiovascular system       |
| Light red    | Endocrine system            |
| Pink         | Female reproductive system  |
| Orange       | Gastrointestinal tract      |
| Yellow-green | Immune system               |
| Yellow       | Integumentary system        |
| Green        | Male reproductive system    |
| Black        | Mixture of multiple tissues |
| Purple       | Muscular system             |
| Dark green   | Nervous system              |
| Dark blue    | Cells, cell lines, embryo   |
| Cyan         | Renal system                |
| Blue         | Respiratory system          |

Sample-to-sample analysis by organ system  
 $r \geq 0.38$

206 nodes, 14,243 edges

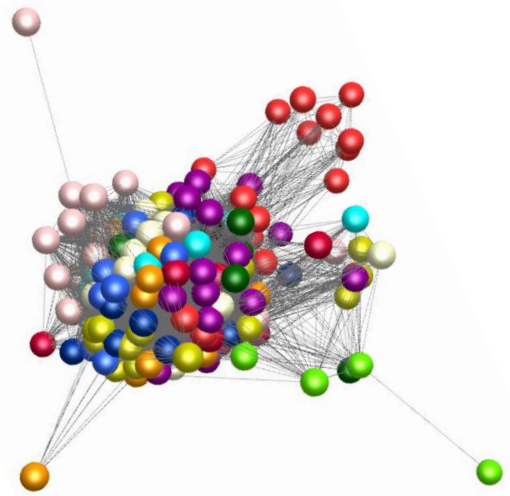

Sample-to-sample analysis by organ system

$r \geq 0.85$

188 nodes, 1378 edges

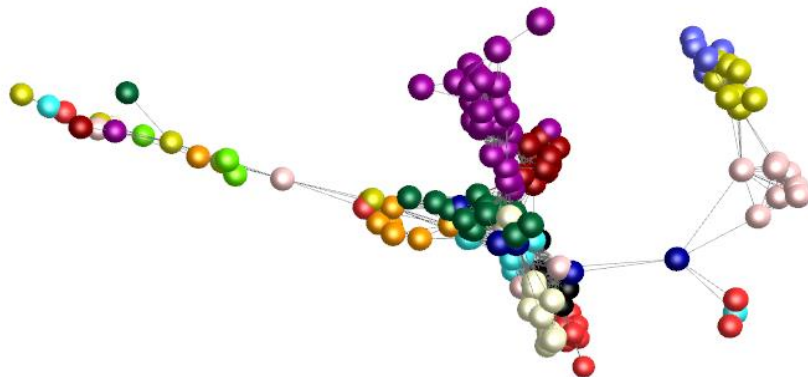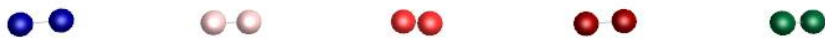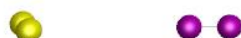

**B. Analysis of liver samples**

$r \geq 0.9$

102 nodes, 1301 edges

Nodes are coloured by BioProject ID

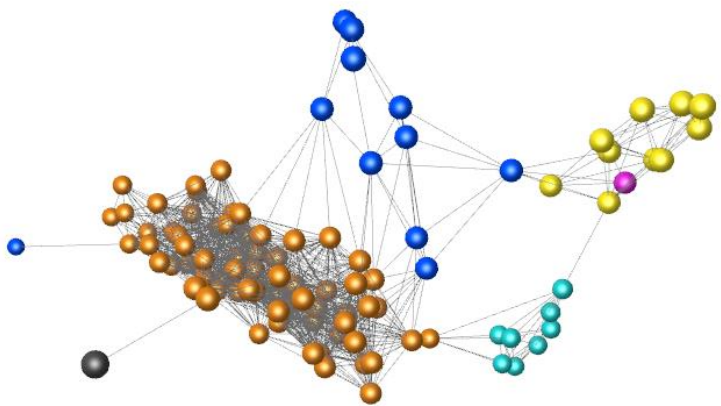

| Node colour | BioProject  | Description                                                                                                                 |
|-------------|-------------|-----------------------------------------------------------------------------------------------------------------------------|
|             | PRJNA193204 | Berkshire pig, adult (Sodhi et al., 2017)                                                                                   |
|             | PRJNA240332 | Yorkshire-Landrace cross pigs, juvenile (15-20 kg), haemorrhagic shock model (Determan et al., 2014)                        |
|             | PRJNA297855 | Guizhou minipig, 240 days postnatal (Tang et al., 2017)                                                                     |
|             | PRJNA305529 | Iberian-Landrace cross, backcrossed to Landrace, 175 days postnatal, low and high growth and fatness (Martinez-Montes 2016) |
|             | PRJNA311523 | Various breeds, 60 days postnatal {Li 2017}                                                                                 |
|             | PRJNA451072 | Danish Landrace pigs, adult (100 kg), high and medium boar taint (Drag et al., 2017)                                        |

**C. Analysis of central nervous system samples**

$r \geq 0.87$

30 nodes, 142 edges

Nodes are coloured by region

| Node colour | Region                |
|-------------|-----------------------|
|             | Amygdala              |
|             | Brain                 |
|             | Brainstem             |
|             | Corpus callosum       |
|             | Cortex                |
|             | Thalamus              |
|             | Forebrain             |
|             | Frontal cortex        |
|             | Hippocampal formation |
|             | Hypothalamus          |
|             | Medulla oblongata     |
|             | Occipital cortex      |
|             | Pituitary gland       |
|             | Pons                  |

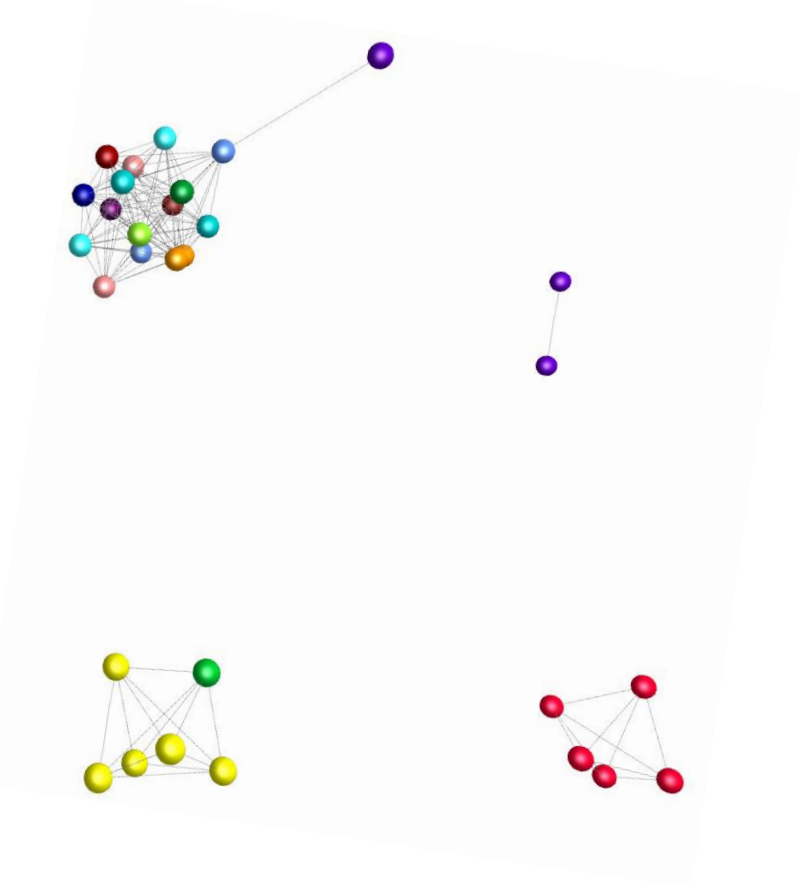

## References for Supplementary Figures

- Determan, C., Jr., R. Anderson, A. Becker, N. Witowski, E. Luszczyk, K. Mulier et al. (2014). Fed state prior to hemorrhagic shock and polytrauma in a porcine model results in altered liver transcriptomic response. PLoS One **9**(6): e100088.
- Drag, M., R. Skinkyte-Juskiene, D. N. Do, L. J. A. Kogelman and H. N. Kadarmideen (2017). Differential expression and co-expression gene networks reveal candidate biomarkers of boar taint in non-castrated pigs. Sci Rep **7**(1): 12205.
- Li, M., L. Chen, S. Tian, Y. Lin, Q. Tang, X. Zhou, et al. (2017). Comprehensive variation discovery and recovery of missing sequence in the pig genome using multiple de novo assemblies. Genome Res **27**(5): 865-874.
- Martinez-Montes, A. M., A. Fernandez, D. Perez-Montarelo, E. Alves, R. M. Benitez, Y. Nunez, et al. (2017). Using RNA-Seq SNP data to reveal potential causal mutations related to pig production traits and RNA editing. Anim Genet **48**(2): 151-165.
- Sodhi, S. S., K. D. Song, M. Ghosh, N. Sharma, S. J. Lee, J. H. Kim, et al. (2014). Comparative transcriptomic analysis by RNA-seq to discern differential expression of genes in liver and muscle tissues of adult Berkshire and Jeju Native Pig. Gene **546**(2): 233-242.
- Tang, Z., Y. Wu, Y. Yang, Y. T. Yang, Z. Wang, J. Yuan, et al. (2017). "Comprehensive analysis of long non-coding RNAs highlights their spatio-temporal expression patterns and evolutionary conservation in *Sus scrofa*." Sci Rep **7**: 43166.
