# Supplementary material for: Functional Annotation of the Transcriptome of the Pig, Sus scrofa, Based Upon Network Analysis of an RNAseq Transcriptional Atlas
Source: Front Genet. 2020 Feb 14;10:1355. doi: 10.3389/fgene.2019.01355 (PMC7034361; doi:10.3389/fgene.2019.01355)
Supplement: Supplementary file 2 [file Table_1.xlsx]

## Sheet: Supplementary Table S1
Supplementary Table S1
Metadata for the RNAseq libraries used in the analysis
Sample number	SRA sample ID	Species	BioProject ID	SRA run ID	SRA experiment ID	Library strategy	Library selection	Library source	Library layout	Number of reads (millions)	Avg. read length (bp)	Sequencing platform	Model	URL for sra download	URL for fastq 1 (from EBI ENA)	URL for fastq 2 (from EBI ENA)	Full metadata line (obtained by parsing SRAmetadb.sqlite)	Tissue/cell type	Breed	Age	Sex
1	DRS034708	Sus scrofa	PRJDB5113	DRR124548	DRX117351	RNA-Seq	cDNA	TRANSCRIPTOMIC	PAIRED	22.86	200	ILLUMINA	Illumina HiSeq 2500	https://sra-download.ncbi.nlm.nih.gov/traces/dra4/DRR/000121/DRR124548	ftp://ftp.sra.ebi.ac.uk/vol1/fastq/DRR124/DRR124548/DRR124548_1.fastq.gz	ftp://ftp.sra.ebi.ac.uk/vol1/fastq/DRR124/DRR124548/DRR124548_2.fastq.gz	bioproject_id: PRJDB5113 || sample_title: mRNA trascriptome of pig embryonic fibroblasts || cell_type: somatic cells || sample_name: PEF	somatic cells	Unknown	unknown	unknown
2	DRS034741	Sus scrofa	PRJDB5113	DRR124547	DRX117350	RNA-Seq	cDNA	TRANSCRIPTOMIC	PAIRED	22.7	200	ILLUMINA	Illumina HiSeq 2500	https://sra-download.ncbi.nlm.nih.gov/traces/dra4/DRR/000121/DRR124547	ftp://ftp.sra.ebi.ac.uk/vol1/fastq/DRR124/DRR124547/DRR124547_1.fastq.gz	ftp://ftp.sra.ebi.ac.uk/vol1/fastq/DRR124/DRR124547/DRR124547_2.fastq.gz	bioproject_id: PRJDB5113 || cell_type: stem cells || sample_name: piPSC2 || sex: female || sample_title: mRNA trascriptome of pig induced pluripotent stem cells clone 2	stem cells	Unknown	unknown	female
3	DRS034742	Sus scrofa	PRJDB5113	DRR124546	DRX117349	RNA-Seq	cDNA	TRANSCRIPTOMIC	PAIRED	23.74	200	ILLUMINA	Illumina HiSeq 2500	https://sra-download.ncbi.nlm.nih.gov/traces/dra4/DRR/000121/DRR124546	ftp://ftp.sra.ebi.ac.uk/vol1/fastq/DRR124/DRR124546/DRR124546_1.fastq.gz	ftp://ftp.sra.ebi.ac.uk/vol1/fastq/DRR124/DRR124546/DRR124546_2.fastq.gz	bioproject_id: PRJDB5113 || cell_type: stem cells || sample_name: piPSC1 || sex: female || sample_title: mRNA trascriptome of pig induced pluripotent stem cells clone 1	stem cells	unknown	unknown	female
4	ERS1793644	Sus scrofa	PRJEB19386	ERR1824262	ERX1886666	RNA-Seq	Inverse rRNA	TRANSCRIPTOMIC	PAIRED	40.18	200	ILLUMINA	Illumina HiSeq 2500	https://sra-download.ncbi.nlm.nih.gov/traces/era18/ERR/ERR1824/ERR1824262	ftp://ftp.sra.ebi.ac.uk/vol1/fastq/ERR182/002/ERR1824262/ERR1824262_1.fastq.gz	ftp://ftp.sra.ebi.ac.uk/vol1/fastq/ERR182/002/ERR1824262/ERR1824262_2.fastq.gz	project: FAANG || Material: specimen from organism || organism part: pituitary gland || specimen collection protocol: http://ftp.faang.ebi.ac.uk/ftp/protocols/samples/ROSLIN_SOP_Harvest_of_Large_Animal_Tissues_20160516.pdf || specimen collection date: 2013-08-01 || animal age at collection: 4 || developmental stage: juvenile stage || health status at collection: normal || fasted status: fed	pituitary gland	Duroc	juvenile stage	unknown
5	ERS1793645	Sus scrofa	PRJEB19386	ERR1824263	ERX1886667	RNA-Seq	Inverse rRNA	TRANSCRIPTOMIC	PAIRED	38.66	200	ILLUMINA	Illumina HiSeq 2500	https://sra-download.ncbi.nlm.nih.gov/traces/era18/ERR/ERR1824/ERR1824263	ftp://ftp.sra.ebi.ac.uk/vol1/fastq/ERR182/003/ERR1824263/ERR1824263_1.fastq.gz	ftp://ftp.sra.ebi.ac.uk/vol1/fastq/ERR182/003/ERR1824263/ERR1824263_2.fastq.gz	project: FAANG || Material: specimen from organism || organism part: cortex of kidney || specimen collection protocol: http://ftp.faang.ebi.ac.uk/ftp/protocols/samples/ROSLIN_SOP_Harvest_of_Large_Animal_Tissues_20160516.pdf || specimen collection date: 2013-08-01 || animal age at collection: 4 || developmental stage: juvenile stage || health status at collection: normal || fasted status: fed	cortex of kidney	Duroc	juvenile stage	unknown
6	ERS1793646	Sus scrofa	PRJEB19386	ERR1824264	ERX1886668	RNA-Seq	Inverse rRNA	TRANSCRIPTOMIC	PAIRED	40.78	200	ILLUMINA	Illumina HiSeq 2500	https://sra-download.ncbi.nlm.nih.gov/traces/era18/ERR/ERR1824/ERR1824264	ftp://ftp.sra.ebi.ac.uk/vol1/fastq/ERR182/004/ERR1824264/ERR1824264_1.fastq.gz	ftp://ftp.sra.ebi.ac.uk/vol1/fastq/ERR182/004/ERR1824264/ERR1824264_2.fastq.gz	project: FAANG || Material: specimen from organism || organism part: heart left ventricle || specimen collection protocol: http://ftp.faang.ebi.ac.uk/ftp/protocols/samples/ROSLIN_SOP_Harvest_of_Large_Animal_Tissues_20160516.pdf || specimen collection date: 2013-08-01 || animal age at collection: 4 || developmental stage: juvenile stage || health status at collection: normal || fasted status: fed	heart left ventricle	Duroc	juvenile stage	unknown
7	ERS1793647	Sus scrofa	PRJEB19386	ERR1824274	ERX1886670	RNA-Seq	Inverse rRNA	TRANSCRIPTOMIC	PAIRED	20.47	200	ILLUMINA	Illumina HiSeq 2500	https://sra-download.ncbi.nlm.nih.gov/traces/era18/ERR/ERR1824/ERR1824274	ftp://ftp.sra.ebi.ac.uk/vol1/fastq/ERR182/004/ERR1824274/ERR1824274_1.fastq.gz	ftp://ftp.sra.ebi.ac.uk/vol1/fastq/ERR182/004/ERR1824274/ERR1824274_2.fastq.gz	project: FAANG || Material: specimen from organism || organism part: caecum || specimen collection protocol: http://ftp.faang.ebi.ac.uk/ftp/protocols/samples/ROSLIN_SOP_Harvest_of_Large_Animal_Tissues_20160516.pdf || specimen collection date: 2013-08-01 || animal age at collection: 4 || developmental stage: juvenile stage || health status at collection: normal || fasted status: fed	caecum	Duroc	juvenile stage	unknown
7	ERS1793647	Sus scrofa	PRJEB19386	ERR1824275	ERX1886670	RNA-Seq	Inverse rRNA	TRANSCRIPTOMIC	PAIRED	20.39	200	ILLUMINA	Illumina HiSeq 2500	https://sra-download.ncbi.nlm.nih.gov/traces/era18/ERR/ERR1824/ERR1824275	ftp://ftp.sra.ebi.ac.uk/vol1/fastq/ERR182/005/ERR1824275/ERR1824275_1.fastq.gz	ftp://ftp.sra.ebi.ac.uk/vol1/fastq/ERR182/005/ERR1824275/ERR1824275_2.fastq.gz	project: FAANG || Material: specimen from organism || organism part: caecum || specimen collection protocol: http://ftp.faang.ebi.ac.uk/ftp/protocols/samples/ROSLIN_SOP_Harvest_of_Large_Animal_Tissues_20160516.pdf || specimen collection date: 2013-08-01 || animal age at collection: 4 || developmental stage: juvenile stage || health status at collection: normal || fasted status: fed	caecum	Duroc	juvenile stage	unknown
7	ERS1793647	Sus scrofa	PRJEB19386	ERR1824387	ERX1886669	RNA-Seq	Inverse rRNA	TRANSCRIPTOMIC	PAIRED	15.05	300	ILLUMINA	Illumina HiSeq 2500	https://sra-download.ncbi.nlm.nih.gov/traces/era18/ERR/ERR1824/ERR1824387	ftp://ftp.sra.ebi.ac.uk/vol1/fastq/ERR182/007/ERR1824387/ERR1824387_1.fastq.gz	ftp://ftp.sra.ebi.ac.uk/vol1/fastq/ERR182/007/ERR1824387/ERR1824387_2.fastq.gz	project: FAANG || Material: specimen from organism || organism part: caecum || specimen collection protocol: http://ftp.faang.ebi.ac.uk/ftp/protocols/samples/ROSLIN_SOP_Harvest_of_Large_Animal_Tissues_20160516.pdf || specimen collection date: 2013-08-01 || animal age at collection: 4 || developmental stage: juvenile stage || health status at collection: normal || fasted status: fed	caecum	Duroc	juvenile stage	unknown
7	ERS1793647	Sus scrofa	PRJEB19386	ERR1824388	ERX1886669	RNA-Seq	Inverse rRNA	TRANSCRIPTOMIC	PAIRED	15.04	300	ILLUMINA	Illumina HiSeq 2500	https://sra-download.ncbi.nlm.nih.gov/traces/era18/ERR/ERR1824/ERR1824388	ftp://ftp.sra.ebi.ac.uk/vol1/fastq/ERR182/008/ERR1824388/ERR1824388_1.fastq.gz	ftp://ftp.sra.ebi.ac.uk/vol1/fastq/ERR182/008/ERR1824388/ERR1824388_2.fastq.gz	project: FAANG || Material: specimen from organism || organism part: caecum || specimen collection protocol: http://ftp.faang.ebi.ac.uk/ftp/protocols/samples/ROSLIN_SOP_Harvest_of_Large_Animal_Tissues_20160516.pdf || specimen collection date: 2013-08-01 || animal age at collection: 4 || developmental stage: juvenile stage || health status at collection: normal || fasted status: fed	caecum	Duroc	juvenile stage	unknown
8	ERS1793648	Sus scrofa	PRJEB19386	ERR1824276	ERX1886672	RNA-Seq	Inverse rRNA	TRANSCRIPTOMIC	PAIRED	19.81	200	ILLUMINA	Illumina HiSeq 2500	https://sra-download.ncbi.nlm.nih.gov/traces/era18/ERR/ERR1824/ERR1824276	ftp://ftp.sra.ebi.ac.uk/vol1/fastq/ERR182/006/ERR1824276/ERR1824276_1.fastq.gz	ftp://ftp.sra.ebi.ac.uk/vol1/fastq/ERR182/006/ERR1824276/ERR1824276_2.fastq.gz	project: FAANG || Material: specimen from organism || organism part: mesenteric lymph node || specimen collection protocol: http://ftp.faang.ebi.ac.uk/ftp/protocols/samples/ROSLIN_SOP_Harvest_of_Large_Animal_Tissues_20160516.pdf || specimen collection date: 2013-08-01 || animal age at collection: 4 || developmental stage: juvenile stage || health status at collection: normal || fasted status: fed	mesenteric lymph node	Duroc	juvenile stage	unknown
8	ERS1793648	Sus scrofa	PRJEB19386	ERR1824277	ERX1886672	RNA-Seq	Inverse rRNA	TRANSCRIPTOMIC	PAIRED	20.05	200	ILLUMINA	Illumina HiSeq 2500	https://sra-download.ncbi.nlm.nih.gov/traces/era18/ERR/ERR1824/ERR1824277	ftp://ftp.sra.ebi.ac.uk/vol1/fastq/ERR182/007/ERR1824277/ERR1824277_1.fastq.gz	ftp://ftp.sra.ebi.ac.uk/vol1/fastq/ERR182/007/ERR1824277/ERR1824277_2.fastq.gz	project: FAANG || Material: specimen from organism || organism part: mesenteric lymph node || specimen collection protocol: http://ftp.faang.ebi.ac.uk/ftp/protocols/samples/ROSLIN_SOP_Harvest_of_Large_Animal_Tissues_20160516.pdf || specimen collection date: 2013-08-01 || animal age at collection: 4 || developmental stage: juvenile stage || health status at collection: normal || fasted status: fed	mesenteric lymph node	Duroc	juvenile stage	unknown
8	ERS1793648	Sus scrofa	PRJEB19386	ERR1824389	ERX1886671	RNA-Seq	Inverse rRNA	TRANSCRIPTOMIC	PAIRED	12.33	300	ILLUMINA	Illumina HiSeq 2500	https://sra-download.ncbi.nlm.nih.gov/traces/era18/ERR/ERR1824/ERR1824389	ftp://ftp.sra.ebi.ac.uk/vol1/fastq/ERR182/009/ERR1824389/ERR1824389_1.fastq.gz	ftp://ftp.sra.ebi.ac.uk/vol1/fastq/ERR182/009/ERR1824389/ERR1824389_2.fastq.gz	project: FAANG || Material: specimen from organism || organism part: mesenteric lymph node || specimen collection protocol: http://ftp.faang.ebi.ac.uk/ftp/protocols/samples/ROSLIN_SOP_Harvest_of_Large_Animal_Tissues_20160516.pdf || specimen collection date: 2013-08-01 || animal age at collection: 4 || developmental stage: juvenile stage || health status at collection: normal || fasted status: fed	mesenteric lymph node	Duroc	juvenile stage	unknown
8	ERS1793648	Sus scrofa	PRJEB19386	ERR1824390	ERX1886671	RNA-Seq	Inverse rRNA	TRANSCRIPTOMIC	PAIRED	12.33	300	ILLUMINA	Illumina HiSeq 2500	https://sra-download.ncbi.nlm.nih.gov/traces/era18/ERR/ERR1824/ERR1824390	ftp://ftp.sra.ebi.ac.uk/vol1/fastq/ERR182/000/ERR1824390/ERR1824390_1.fastq.gz	ftp://ftp.sra.ebi.ac.uk/vol1/fastq/ERR182/000/ERR1824390/ERR1824390_2.fastq.gz	project: FAANG || Material: specimen from organism || organism part: mesenteric lymph node || specimen collection protocol: http://ftp.faang.ebi.ac.uk/ftp/protocols/samples/ROSLIN_SOP_Harvest_of_Large_Animal_Tissues_20160516.pdf || specimen collection date: 2013-08-01 || animal age at collection: 4 || developmental stage: juvenile stage || health status at collection: normal || fasted status: fed	mesenteric lymph node	Duroc	juvenile stage	unknown
8	ERS1793648	Sus scrofa	PRJEB19386	ERR1824469	ERX1886671	RNA-Seq	Inverse rRNA	TRANSCRIPTOMIC	PAIRED	11.84	300	ILLUMINA	Illumina HiSeq 2500	https://sra-download.ncbi.nlm.nih.gov/traces/era18/ERR/ERR1824/ERR1824469	ftp://ftp.sra.ebi.ac.uk/vol1/fastq/ERR182/009/ERR1824469/ERR1824469_1.fastq.gz	ftp://ftp.sra.ebi.ac.uk/vol1/fastq/ERR182/009/ERR1824469/ERR1824469_2.fastq.gz	project: FAANG || Material: specimen from organism || organism part: mesenteric lymph node || specimen collection protocol: http://ftp.faang.ebi.ac.uk/ftp/protocols/samples/ROSLIN_SOP_Harvest_of_Large_Animal_Tissues_20160516.pdf || specimen collection date: 2013-08-01 || animal age at collection: 4 || developmental stage: juvenile stage || health status at collection: normal || fasted status: fed	mesenteric lymph node	Duroc	juvenile stage	unknown
8	ERS1793648	Sus scrofa	PRJEB19386	ERR1824470	ERX1886671	RNA-Seq	Inverse rRNA	TRANSCRIPTOMIC	PAIRED	12.02	300	ILLUMINA	Illumina HiSeq 2500	https://sra-download.ncbi.nlm.nih.gov/traces/era18/ERR/ERR1824/ERR1824470	ftp://ftp.sra.ebi.ac.uk/vol1/fastq/ERR182/000/ERR1824470/ERR1824470_1.fastq.gz	ftp://ftp.sra.ebi.ac.uk/vol1/fastq/ERR182/000/ERR1824470/ERR1824470_2.fastq.gz	project: FAANG || Material: specimen from organism || organism part: mesenteric lymph node || specimen collection protocol: http://ftp.faang.ebi.ac.uk/ftp/protocols/samples/ROSLIN_SOP_Harvest_of_Large_Animal_Tissues_20160516.pdf || specimen collection date: 2013-08-01 || animal age at collection: 4 || developmental stage: juvenile stage || health status at collection: normal || fasted status: fed	mesenteric lymph node	Duroc	juvenile stage	unknown
9	ERS1793649	Sus scrofa	PRJEB19386	ERR1824278	ERX1886673	RNA-Seq	Inverse rRNA	TRANSCRIPTOMIC	PAIRED	16.2	200	ILLUMINA	Illumina HiSeq 2500	https://sra-download.ncbi.nlm.nih.gov/traces/era18/ERR/ERR1824/ERR1824278	ftp://ftp.sra.ebi.ac.uk/vol1/fastq/ERR182/008/ERR1824278/ERR1824278_1.fastq.gz	ftp://ftp.sra.ebi.ac.uk/vol1/fastq/ERR182/008/ERR1824278/ERR1824278_2.fastq.gz	project: FAANG || Material: specimen from organism || organism part: skeletal muscle tissue || specimen collection protocol: http://ftp.faang.ebi.ac.uk/ftp/protocols/samples/ROSLIN_SOP_Harvest_of_Large_Animal_Tissues_20160516.pdf || specimen collection date: 2013-08-01 || animal age at collection: 4 || developmental stage: juvenile stage || health status at collection: normal || fasted status: fed	skeletal muscle tissue	Duroc	juvenile stage	unknown
9	ERS1793649	Sus scrofa	PRJEB19386	ERR1824279	ERX1886673	RNA-Seq	Inverse rRNA	TRANSCRIPTOMIC	PAIRED	16.03	200	ILLUMINA	Illumina HiSeq 2500	https://sra-download.ncbi.nlm.nih.gov/traces/era18/ERR/ERR1824/ERR1824279	ftp://ftp.sra.ebi.ac.uk/vol1/fastq/ERR182/009/ERR1824279/ERR1824279_1.fastq.gz	ftp://ftp.sra.ebi.ac.uk/vol1/fastq/ERR182/009/ERR1824279/ERR1824279_2.fastq.gz	project: FAANG || Material: specimen from organism || organism part: skeletal muscle tissue || specimen collection protocol: http://ftp.faang.ebi.ac.uk/ftp/protocols/samples/ROSLIN_SOP_Harvest_of_Large_Animal_Tissues_20160516.pdf || specimen collection date: 2013-08-01 || animal age at collection: 4 || developmental stage: juvenile stage || health status at collection: normal || fasted status: fed	skeletal muscle tissue	Duroc	juvenile stage	unknown
10	ERS1793650	Sus scrofa	PRJEB19386	ERR1824280	ERX1886674	RNA-Seq	Inverse rRNA	TRANSCRIPTOMIC	PAIRED	17.38	200	ILLUMINA	Illumina HiSeq 2500	https://sra-download.ncbi.nlm.nih.gov/traces/era18/ERR/ERR1824/ERR1824280	ftp://ftp.sra.ebi.ac.uk/vol1/fastq/ERR182/000/ERR1824280/ERR1824280_1.fastq.gz	ftp://ftp.sra.ebi.ac.uk/vol1/fastq/ERR182/000/ERR1824280/ERR1824280_2.fastq.gz	project: FAANG || Material: specimen from organism || organism part: spleen || specimen collection protocol: http://ftp.faang.ebi.ac.uk/ftp/protocols/samples/ROSLIN_SOP_Harvest_of_Large_Animal_Tissues_20160516.pdf || specimen collection date: 2013-08-01 || animal age at collection: 4 || developmental stage: juvenile stage || health status at collection: normal || fasted status: fed	spleen	Duroc	juvenile stage	unknown
10	ERS1793650	Sus scrofa	PRJEB19386	ERR1824281	ERX1886674	RNA-Seq	Inverse rRNA	TRANSCRIPTOMIC	PAIRED	17.7	200	ILLUMINA	Illumina HiSeq 2500	https://sra-download.ncbi.nlm.nih.gov/traces/era18/ERR/ERR1824/ERR1824281	ftp://ftp.sra.ebi.ac.uk/vol1/fastq/ERR182/001/ERR1824281/ERR1824281_1.fastq.gz	ftp://ftp.sra.ebi.ac.uk/vol1/fastq/ERR182/001/ERR1824281/ERR1824281_2.fastq.gz	project: FAANG || Material: specimen from organism || organism part: spleen || specimen collection protocol: http://ftp.faang.ebi.ac.uk/ftp/protocols/samples/ROSLIN_SOP_Harvest_of_Large_Animal_Tissues_20160516.pdf || specimen collection date: 2013-08-01 || animal age at collection: 4 || developmental stage: juvenile stage || health status at collection: normal || fasted status: fed	spleen	Duroc	juvenile stage	unknown
11	ERS1793651	Sus scrofa	PRJEB19386	ERR1824391	ERX1886675	RNA-Seq	Inverse rRNA	TRANSCRIPTOMIC	PAIRED	19.01	300	ILLUMINA	Illumina HiSeq 2500	https://sra-download.ncbi.nlm.nih.gov/traces/era18/ERR/ERR1824/ERR1824391	ftp://ftp.sra.ebi.ac.uk/vol1/fastq/ERR182/001/ERR1824391/ERR1824391_1.fastq.gz	ftp://ftp.sra.ebi.ac.uk/vol1/fastq/ERR182/001/ERR1824391/ERR1824391_2.fastq.gz	project: FAANG || Material: specimen from organism || organism part: uterus || specimen collection protocol: http://ftp.faang.ebi.ac.uk/ftp/protocols/samples/ROSLIN_SOP_Harvest_of_Large_Animal_Tissues_20160516.pdf || specimen collection date: 2013-08-01 || animal age at collection: 4 || developmental stage: juvenile stage || health status at collection: normal || fasted status: fed	uterus	Duroc	juvenile stage	unknown
11	ERS1793651	Sus scrofa	PRJEB19386	ERR1824392	ERX1886675	RNA-Seq	Inverse rRNA	TRANSCRIPTOMIC	PAIRED	19	300	ILLUMINA	Illumina HiSeq 2500	https://sra-download.ncbi.nlm.nih.gov/traces/era18/ERR/ERR1824/ERR1824392	ftp://ftp.sra.ebi.ac.uk/vol1/fastq/ERR182/002/ERR1824392/ERR1824392_1.fastq.gz	ftp://ftp.sra.ebi.ac.uk/vol1/fastq/ERR182/002/ERR1824392/ERR1824392_2.fastq.gz	project: FAANG || Material: specimen from organism || organism part: uterus || specimen collection protocol: http://ftp.faang.ebi.ac.uk/ftp/protocols/samples/ROSLIN_SOP_Harvest_of_Large_Animal_Tissues_20160516.pdf || specimen collection date: 2013-08-01 || animal age at collection: 4 || developmental stage: juvenile stage || health status at collection: normal || fasted status: fed	uterus	Duroc	juvenile stage	unknown
12	ERS1793652	Sus scrofa	PRJEB19386	ERR1824282	ERX1886676	RNA-Seq	Inverse rRNA	TRANSCRIPTOMIC	PAIRED	16.45	200	ILLUMINA	Illumina HiSeq 2500	https://sra-download.ncbi.nlm.nih.gov/traces/era18/ERR/ERR1824/ERR1824282	ftp://ftp.sra.ebi.ac.uk/vol1/fastq/ERR182/002/ERR1824282/ERR1824282_1.fastq.gz	ftp://ftp.sra.ebi.ac.uk/vol1/fastq/ERR182/002/ERR1824282/ERR1824282_2.fastq.gz	project: FAANG || Material: cell specimen || purification protocol: http://ftp.faang.ebi.ac.uk/ftp/protocols/samples/ ROSLIN_SOP_Isolation_of_Macrophages_from_Lungs_Blood_and_Bone_Marrow_of_Large_Animals_20160516.pdf || cell_type: alveolar macrophage	alveolar macrophage	Duroc	unknown	unknown
12	ERS1793652	Sus scrofa	PRJEB19386	ERR1824283	ERX1886676	RNA-Seq	Inverse rRNA	TRANSCRIPTOMIC	PAIRED	16.79	200	ILLUMINA	Illumina HiSeq 2500	https://sra-download.ncbi.nlm.nih.gov/traces/era18/ERR/ERR1824/ERR1824283	ftp://ftp.sra.ebi.ac.uk/vol1/fastq/ERR182/003/ERR1824283/ERR1824283_1.fastq.gz	ftp://ftp.sra.ebi.ac.uk/vol1/fastq/ERR182/003/ERR1824283/ERR1824283_2.fastq.gz	project: FAANG || Material: cell specimen || purification protocol: http://ftp.faang.ebi.ac.uk/ftp/protocols/samples/ ROSLIN_SOP_Isolation_of_Macrophages_from_Lungs_Blood_and_Bone_Marrow_of_Large_Animals_20160516.pdf || cell_type: alveolar macrophage	alveolar macrophage	Duroc	unknown	unknown
13	ERS1793653	Sus scrofa	PRJEB19386	ERR1824265	ERX1886677	RNA-Seq	Inverse rRNA	TRANSCRIPTOMIC	PAIRED	19.61	200	ILLUMINA	Illumina HiSeq 2500	https://sra-download.ncbi.nlm.nih.gov/traces/era18/ERR/ERR1824/ERR1824265	ftp://ftp.sra.ebi.ac.uk/vol1/fastq/ERR182/005/ERR1824265/ERR1824265_1.fastq.gz	ftp://ftp.sra.ebi.ac.uk/vol1/fastq/ERR182/005/ERR1824265/ERR1824265_2.fastq.gz	project: FAANG || Material: specimen from organism || organism part: omentum || specimen collection protocol: http://ftp.faang.ebi.ac.uk/ftp/protocols/samples/ROSLIN_SOP_Harvest_of_Large_Animal_Tissues_20160516.pdf || specimen collection date: 2013-08-01 || animal age at collection: 4 || developmental stage: juvenile stage || health status at collection: normal || fasted status: fed	omentum	Duroc	juvenile stage	unknown
14	ERS1793654	Sus scrofa	PRJEB19386	ERR1824284	ERX1886678	RNA-Seq	Inverse rRNA	TRANSCRIPTOMIC	PAIRED	20.59	200	ILLUMINA	Illumina HiSeq 2500	https://sra-download.ncbi.nlm.nih.gov/traces/era18/ERR/ERR1824/ERR1824284	ftp://ftp.sra.ebi.ac.uk/vol1/fastq/ERR182/004/ERR1824284/ERR1824284_1.fastq.gz	ftp://ftp.sra.ebi.ac.uk/vol1/fastq/ERR182/004/ERR1824284/ERR1824284_2.fastq.gz	project: FAANG || Material: specimen from organism || organism part: cortex of kidney || specimen collection protocol: http://ftp.faang.ebi.ac.uk/ftp/protocols/samples/ROSLIN_SOP_Harvest_of_Large_Animal_Tissues_20160516.pdf || specimen collection date: 2013-08-02 || animal age at collection: 4 || developmental stage: juvenile stage || health status at collection: normal || fasted status: fed	cortex of kidney	Duroc	juvenile stage	unknown
14	ERS1793654	Sus scrofa	PRJEB19386	ERR1824285	ERX1886678	RNA-Seq	Inverse rRNA	TRANSCRIPTOMIC	PAIRED	20.85	200	ILLUMINA	Illumina HiSeq 2500	https://sra-download.ncbi.nlm.nih.gov/traces/era18/ERR/ERR1824/ERR1824285	ftp://ftp.sra.ebi.ac.uk/vol1/fastq/ERR182/005/ERR1824285/ERR1824285_1.fastq.gz	ftp://ftp.sra.ebi.ac.uk/vol1/fastq/ERR182/005/ERR1824285/ERR1824285_2.fastq.gz	project: FAANG || Material: specimen from organism || organism part: cortex of kidney || specimen collection protocol: http://ftp.faang.ebi.ac.uk/ftp/protocols/samples/ROSLIN_SOP_Harvest_of_Large_Animal_Tissues_20160516.pdf || specimen collection date: 2013-08-02 || animal age at collection: 4 || developmental stage: juvenile stage || health status at collection: normal || fasted status: fed	cortex of kidney	Duroc	juvenile stage	unknown
15	ERS1793655	Sus scrofa	PRJEB19386	ERR1824286	ERX1886679	RNA-Seq	Inverse rRNA	TRANSCRIPTOMIC	PAIRED	19.04	200	ILLUMINA	Illumina HiSeq 2500	https://sra-download.ncbi.nlm.nih.gov/traces/era18/ERR/ERR1824/ERR1824286	ftp://ftp.sra.ebi.ac.uk/vol1/fastq/ERR182/006/ERR1824286/ERR1824286_1.fastq.gz	ftp://ftp.sra.ebi.ac.uk/vol1/fastq/ERR182/006/ERR1824286/ERR1824286_2.fastq.gz	project: FAANG || Material: specimen from organism || organism part: heart left ventricle || specimen collection protocol: http://ftp.faang.ebi.ac.uk/ftp/protocols/samples/ROSLIN_SOP_Harvest_of_Large_Animal_Tissues_20160516.pdf || specimen collection date: 2013-08-02 || animal age at collection: 4 || developmental stage: juvenile stage || health status at collection: normal || fasted status: fed	heart left ventricle	Duroc	juvenile stage	unknown
15	ERS1793655	Sus scrofa	PRJEB19386	ERR1824287	ERX1886679	RNA-Seq	Inverse rRNA	TRANSCRIPTOMIC	PAIRED	18.84	200	ILLUMINA	Illumina HiSeq 2500	https://sra-download.ncbi.nlm.nih.gov/traces/era18/ERR/ERR1824/ERR1824287	ftp://ftp.sra.ebi.ac.uk/vol1/fastq/ERR182/007/ERR1824287/ERR1824287_1.fastq.gz	ftp://ftp.sra.ebi.ac.uk/vol1/fastq/ERR182/007/ERR1824287/ERR1824287_2.fastq.gz	project: FAANG || Material: specimen from organism || organism part: heart left ventricle || specimen collection protocol: http://ftp.faang.ebi.ac.uk/ftp/protocols/samples/ROSLIN_SOP_Harvest_of_Large_Animal_Tissues_20160516.pdf || specimen collection date: 2013-08-02 || animal age at collection: 4 || developmental stage: juvenile stage || health status at collection: normal || fasted status: fed	heart left ventricle	Duroc	juvenile stage	unknown
16	ERS1793656	Sus scrofa	PRJEB19386	ERR1824288	ERX1886680	RNA-Seq	Inverse rRNA	TRANSCRIPTOMIC	PAIRED	14.34	200	ILLUMINA	Illumina HiSeq 2500	https://sra-download.ncbi.nlm.nih.gov/traces/era18/ERR/ERR1824/ERR1824288	ftp://ftp.sra.ebi.ac.uk/vol1/fastq/ERR182/008/ERR1824288/ERR1824288_1.fastq.gz	ftp://ftp.sra.ebi.ac.uk/vol1/fastq/ERR182/008/ERR1824288/ERR1824288_2.fastq.gz	project: FAANG || Material: specimen from organism || organism part: caecum || specimen collection protocol: http://ftp.faang.ebi.ac.uk/ftp/protocols/samples/ROSLIN_SOP_Harvest_of_Large_Animal_Tissues_20160516.pdf || specimen collection date: 2013-08-02 || animal age at collection: 4 || developmental stage: juvenile stage || health status at collection: normal || fasted status: fed	caecum	Duroc	juvenile stage	unknown
16	ERS1793656	Sus scrofa	PRJEB19386	ERR1824289	ERX1886680	RNA-Seq	Inverse rRNA	TRANSCRIPTOMIC	PAIRED	14.07	200	ILLUMINA	Illumina HiSeq 2500	https://sra-download.ncbi.nlm.nih.gov/traces/era18/ERR/ERR1824/ERR1824289	ftp://ftp.sra.ebi.ac.uk/vol1/fastq/ERR182/009/ERR1824289/ERR1824289_1.fastq.gz	ftp://ftp.sra.ebi.ac.uk/vol1/fastq/ERR182/009/ERR1824289/ERR1824289_2.fastq.gz	project: FAANG || Material: specimen from organism || organism part: caecum || specimen collection protocol: http://ftp.faang.ebi.ac.uk/ftp/protocols/samples/ROSLIN_SOP_Harvest_of_Large_Animal_Tissues_20160516.pdf || specimen collection date: 2013-08-02 || animal age at collection: 4 || developmental stage: juvenile stage || health status at collection: normal || fasted status: fed	caecum	Duroc	juvenile stage	unknown
17	ERS1793657	Sus scrofa	PRJEB19386	ERR1824266	ERX1886682	RNA-Seq	Inverse rRNA	TRANSCRIPTOMIC	PAIRED	14.05	200	ILLUMINA	Illumina HiSeq 2500	https://sra-download.ncbi.nlm.nih.gov/traces/era18/ERR/ERR1824/ERR1824266	ftp://ftp.sra.ebi.ac.uk/vol1/fastq/ERR182/006/ERR1824266/ERR1824266_1.fastq.gz	ftp://ftp.sra.ebi.ac.uk/vol1/fastq/ERR182/006/ERR1824266/ERR1824266_2.fastq.gz	project: FAANG || Material: specimen from organism || organism part: mesenteric lymph node || specimen collection protocol: http://ftp.faang.ebi.ac.uk/ftp/protocols/samples/ROSLIN_SOP_Harvest_of_Large_Animal_Tissues_20160516.pdf || specimen collection date: 2013-08-02 || animal age at collection: 4 || developmental stage: juvenile stage || health status at collection: normal || fasted status: fed	mesenteric lymph node	Duroc	juvenile stage	unknown
17	ERS1793657	Sus scrofa	PRJEB19386	ERR1824393	ERX1886681	RNA-Seq	Inverse rRNA	TRANSCRIPTOMIC	PAIRED	11.17	300	ILLUMINA	Illumina HiSeq 2500	https://sra-download.ncbi.nlm.nih.gov/traces/era18/ERR/ERR1824/ERR1824393	ftp://ftp.sra.ebi.ac.uk/vol1/fastq/ERR182/003/ERR1824393/ERR1824393_1.fastq.gz	ftp://ftp.sra.ebi.ac.uk/vol1/fastq/ERR182/003/ERR1824393/ERR1824393_2.fastq.gz	project: FAANG || Material: specimen from organism || organism part: mesenteric lymph node || specimen collection protocol: http://ftp.faang.ebi.ac.uk/ftp/protocols/samples/ROSLIN_SOP_Harvest_of_Large_Animal_Tissues_20160516.pdf || specimen collection date: 2013-08-02 || animal age at collection: 4 || developmental stage: juvenile stage || health status at collection: normal || fasted status: fed	mesenteric lymph node	Duroc	juvenile stage	unknown
17	ERS1793657	Sus scrofa	PRJEB19386	ERR1824394	ERX1886681	RNA-Seq	Inverse rRNA	TRANSCRIPTOMIC	PAIRED	11.17	300	ILLUMINA	Illumina HiSeq 2500	https://sra-download.ncbi.nlm.nih.gov/traces/era18/ERR/ERR1824/ERR1824394	ftp://ftp.sra.ebi.ac.uk/vol1/fastq/ERR182/004/ERR1824394/ERR1824394_1.fastq.gz	ftp://ftp.sra.ebi.ac.uk/vol1/fastq/ERR182/004/ERR1824394/ERR1824394_2.fastq.gz	project: FAANG || Material: specimen from organism || organism part: mesenteric lymph node || specimen collection protocol: http://ftp.faang.ebi.ac.uk/ftp/protocols/samples/ROSLIN_SOP_Harvest_of_Large_Animal_Tissues_20160516.pdf || specimen collection date: 2013-08-02 || animal age at collection: 4 || developmental stage: juvenile stage || health status at collection: normal || fasted status: fed	mesenteric lymph node	Duroc	juvenile stage	unknown
17	ERS1793657	Sus scrofa	PRJEB19386	ERR1824473	ERX1886681	RNA-Seq	Inverse rRNA	TRANSCRIPTOMIC	PAIRED	10.14	300	ILLUMINA	Illumina HiSeq 2500	https://sra-download.ncbi.nlm.nih.gov/traces/era18/ERR/ERR1824/ERR1824473	ftp://ftp.sra.ebi.ac.uk/vol1/fastq/ERR182/003/ERR1824473/ERR1824473_1.fastq.gz	ftp://ftp.sra.ebi.ac.uk/vol1/fastq/ERR182/003/ERR1824473/ERR1824473_2.fastq.gz	project: FAANG || Material: specimen from organism || organism part: mesenteric lymph node || specimen collection protocol: http://ftp.faang.ebi.ac.uk/ftp/protocols/samples/ROSLIN_SOP_Harvest_of_Large_Animal_Tissues_20160516.pdf || specimen collection date: 2013-08-02 || animal age at collection: 4 || developmental stage: juvenile stage || health status at collection: normal || fasted status: fed	mesenteric lymph node	Duroc	juvenile stage	unknown
17	ERS1793657	Sus scrofa	PRJEB19386	ERR1824474	ERX1886681	RNA-Seq	Inverse rRNA	TRANSCRIPTOMIC	PAIRED	10.13	300	ILLUMINA	Illumina HiSeq 2500	https://sra-download.ncbi.nlm.nih.gov/traces/era18/ERR/ERR1824/ERR1824474	ftp://ftp.sra.ebi.ac.uk/vol1/fastq/ERR182/004/ERR1824474/ERR1824474_1.fastq.gz	ftp://ftp.sra.ebi.ac.uk/vol1/fastq/ERR182/004/ERR1824474/ERR1824474_2.fastq.gz	project: FAANG || Material: specimen from organism || organism part: mesenteric lymph node || specimen collection protocol: http://ftp.faang.ebi.ac.uk/ftp/protocols/samples/ROSLIN_SOP_Harvest_of_Large_Animal_Tissues_20160516.pdf || specimen collection date: 2013-08-02 || animal age at collection: 4 || developmental stage: juvenile stage || health status at collection: normal || fasted status: fed	mesenteric lymph node	Duroc	juvenile stage	unknown
18	ERS1793658	Sus scrofa	PRJEB19386	ERR1824267	ERX1886683	RNA-Seq	Inverse rRNA	TRANSCRIPTOMIC	PAIRED	17.92	200	ILLUMINA	Illumina HiSeq 2500	https://sra-download.ncbi.nlm.nih.gov/traces/era18/ERR/ERR1824/ERR1824267	ftp://ftp.sra.ebi.ac.uk/vol1/fastq/ERR182/007/ERR1824267/ERR1824267_1.fastq.gz	ftp://ftp.sra.ebi.ac.uk/vol1/fastq/ERR182/007/ERR1824267/ERR1824267_2.fastq.gz	project: FAANG || Material: specimen from organism || organism part: spleen || specimen collection protocol: http://ftp.faang.ebi.ac.uk/ftp/protocols/samples/ROSLIN_SOP_Harvest_of_Large_Animal_Tissues_20160516.pdf || specimen collection date: 2013-08-02 || animal age at collection: 4 || developmental stage: juvenile stage || health status at collection: normal || fasted status: fed	spleen	Duroc	juvenile stage	unknown
19	ERS1793659	Sus scrofa	PRJEB19386	ERR1824268	ERX1886685	RNA-Seq	Inverse rRNA	TRANSCRIPTOMIC	PAIRED	17.16	200	ILLUMINA	Illumina HiSeq 2500	https://sra-download.ncbi.nlm.nih.gov/traces/era18/ERR/ERR1824/ERR1824268	ftp://ftp.sra.ebi.ac.uk/vol1/fastq/ERR182/008/ERR1824268/ERR1824268_1.fastq.gz	ftp://ftp.sra.ebi.ac.uk/vol1/fastq/ERR182/008/ERR1824268/ERR1824268_2.fastq.gz	project: FAANG || Material: specimen from organism || organism part: tonsil || specimen collection protocol: http://ftp.faang.ebi.ac.uk/ftp/protocols/samples/ROSLIN_SOP_Harvest_of_Large_Animal_Tissues_20160516.pdf || specimen collection date: 2013-08-02 || animal age at collection: 4 || developmental stage: juvenile stage || health status at collection: normal || fasted status: fed	tonsil	Duroc	juvenile stage	unknown
19	ERS1793659	Sus scrofa	PRJEB19386	ERR1824318	ERX1886685	RNA-Seq	Inverse rRNA	TRANSCRIPTOMIC	PAIRED	10.43	200	ILLUMINA	Illumina HiSeq 2500	https://sra-download.ncbi.nlm.nih.gov/traces/era18/ERR/ERR1824/ERR1824318	ftp://ftp.sra.ebi.ac.uk/vol1/fastq/ERR182/008/ERR1824318/ERR1824318_1.fastq.gz	ftp://ftp.sra.ebi.ac.uk/vol1/fastq/ERR182/008/ERR1824318/ERR1824318_2.fastq.gz	project: FAANG || Material: specimen from organism || organism part: tonsil || specimen collection protocol: http://ftp.faang.ebi.ac.uk/ftp/protocols/samples/ROSLIN_SOP_Harvest_of_Large_Animal_Tissues_20160516.pdf || specimen collection date: 2013-08-02 || animal age at collection: 4 || developmental stage: juvenile stage || health status at collection: normal || fasted status: fed	tonsil	Duroc	juvenile stage	unknown
19	ERS1793659	Sus scrofa	PRJEB19386	ERR1824319	ERX1886685	RNA-Seq	Inverse rRNA	TRANSCRIPTOMIC	PAIRED	10.45	200	ILLUMINA	Illumina HiSeq 2500	https://sra-download.ncbi.nlm.nih.gov/traces/era18/ERR/ERR1824/ERR1824319	ftp://ftp.sra.ebi.ac.uk/vol1/fastq/ERR182/009/ERR1824319/ERR1824319_1.fastq.gz	ftp://ftp.sra.ebi.ac.uk/vol1/fastq/ERR182/009/ERR1824319/ERR1824319_2.fastq.gz	project: FAANG || Material: specimen from organism || organism part: tonsil || specimen collection protocol: http://ftp.faang.ebi.ac.uk/ftp/protocols/samples/ROSLIN_SOP_Harvest_of_Large_Animal_Tissues_20160516.pdf || specimen collection date: 2013-08-02 || animal age at collection: 4 || developmental stage: juvenile stage || health status at collection: normal || fasted status: fed	tonsil	Duroc	juvenile stage	unknown
19	ERS1793659	Sus scrofa	PRJEB19386	ERR1824358	ERX1886685	RNA-Seq	Inverse rRNA	TRANSCRIPTOMIC	PAIRED	31.17	200	ILLUMINA	Illumina HiSeq 2500	https://sra-download.ncbi.nlm.nih.gov/traces/era18/ERR/ERR1824/ERR1824358	ftp://ftp.sra.ebi.ac.uk/vol1/fastq/ERR182/008/ERR1824358/ERR1824358_1.fastq.gz	ftp://ftp.sra.ebi.ac.uk/vol1/fastq/ERR182/008/ERR1824358/ERR1824358_2.fastq.gz	project: FAANG || Material: specimen from organism || organism part: tonsil || specimen collection protocol: http://ftp.faang.ebi.ac.uk/ftp/protocols/samples/ROSLIN_SOP_Harvest_of_Large_Animal_Tissues_20160516.pdf || specimen collection date: 2013-08-02 || animal age at collection: 4 || developmental stage: juvenile stage || health status at collection: normal || fasted status: fed	tonsil	Duroc	juvenile stage	unknown
19	ERS1793659	Sus scrofa	PRJEB19386	ERR1824359	ERX1886685	RNA-Seq	Inverse rRNA	TRANSCRIPTOMIC	PAIRED	31.39	200	ILLUMINA	Illumina HiSeq 2500	https://sra-download.ncbi.nlm.nih.gov/traces/era18/ERR/ERR1824/ERR1824359	ftp://ftp.sra.ebi.ac.uk/vol1/fastq/ERR182/009/ERR1824359/ERR1824359_1.fastq.gz	ftp://ftp.sra.ebi.ac.uk/vol1/fastq/ERR182/009/ERR1824359/ERR1824359_2.fastq.gz	project: FAANG || Material: specimen from organism || organism part: tonsil || specimen collection protocol: http://ftp.faang.ebi.ac.uk/ftp/protocols/samples/ROSLIN_SOP_Harvest_of_Large_Animal_Tissues_20160516.pdf || specimen collection date: 2013-08-02 || animal age at collection: 4 || developmental stage: juvenile stage || health status at collection: normal || fasted status: fed	tonsil	Duroc	juvenile stage	unknown
19	ERS1793659	Sus scrofa	PRJEB19386	ERR1824395	ERX1886684	RNA-Seq	Inverse rRNA	TRANSCRIPTOMIC	PAIRED	16.67	300	ILLUMINA	Illumina HiSeq 2500	https://sra-download.ncbi.nlm.nih.gov/traces/era18/ERR/ERR1824/ERR1824395	ftp://ftp.sra.ebi.ac.uk/vol1/fastq/ERR182/005/ERR1824395/ERR1824395_1.fastq.gz	ftp://ftp.sra.ebi.ac.uk/vol1/fastq/ERR182/005/ERR1824395/ERR1824395_2.fastq.gz	project: FAANG || Material: specimen from organism || organism part: tonsil || specimen collection protocol: http://ftp.faang.ebi.ac.uk/ftp/protocols/samples/ROSLIN_SOP_Harvest_of_Large_Animal_Tissues_20160516.pdf || specimen collection date: 2013-08-02 || animal age at collection: 4 || developmental stage: juvenile stage || health status at collection: normal || fasted status: fed	tonsil	Duroc	juvenile stage	unknown
19	ERS1793659	Sus scrofa	PRJEB19386	ERR1824396	ERX1886684	RNA-Seq	Inverse rRNA	TRANSCRIPTOMIC	PAIRED	16.67	300	ILLUMINA	Illumina HiSeq 2500	https://sra-download.ncbi.nlm.nih.gov/traces/era18/ERR/ERR1824/ERR1824396	ftp://ftp.sra.ebi.ac.uk/vol1/fastq/ERR182/006/ERR1824396/ERR1824396_1.fastq.gz	ftp://ftp.sra.ebi.ac.uk/vol1/fastq/ERR182/006/ERR1824396/ERR1824396_2.fastq.gz	project: FAANG || Material: specimen from organism || organism part: tonsil || specimen collection protocol: http://ftp.faang.ebi.ac.uk/ftp/protocols/samples/ROSLIN_SOP_Harvest_of_Large_Animal_Tissues_20160516.pdf || specimen collection date: 2013-08-02 || animal age at collection: 4 || developmental stage: juvenile stage || health status at collection: normal || fasted status: fed	tonsil	Duroc	juvenile stage	unknown
20	ERS1793660	Sus scrofa	PRJEB19386	ERR1824269	ERX1886687	RNA-Seq	Inverse rRNA	TRANSCRIPTOMIC	PAIRED	18.53	200	ILLUMINA	Illumina HiSeq 2500	https://sra-download.ncbi.nlm.nih.gov/traces/era18/ERR/ERR1824/ERR1824269	ftp://ftp.sra.ebi.ac.uk/vol1/fastq/ERR182/009/ERR1824269/ERR1824269_1.fastq.gz	ftp://ftp.sra.ebi.ac.uk/vol1/fastq/ERR182/009/ERR1824269/ERR1824269_2.fastq.gz	project: FAANG || Material: specimen from organism || organism part: epididymis || specimen collection protocol: http://ftp.faang.ebi.ac.uk/ftp/protocols/samples/ROSLIN_SOP_Harvest_of_Large_Animal_Tissues_20160516.pdf || specimen collection date: 2013-08-02 || animal age at collection: 4 || developmental stage: juvenile stage || health status at collection: normal || fasted status: fed	epididymis	Duroc	juvenile stage	unknown
20	ERS1793660	Sus scrofa	PRJEB19386	ERR1824397	ERX1886686	RNA-Seq	Inverse rRNA	TRANSCRIPTOMIC	PAIRED	14.39	300	ILLUMINA	Illumina HiSeq 2500	https://sra-download.ncbi.nlm.nih.gov/traces/era18/ERR/ERR1824/ERR1824397	ftp://ftp.sra.ebi.ac.uk/vol1/fastq/ERR182/007/ERR1824397/ERR1824397_1.fastq.gz	ftp://ftp.sra.ebi.ac.uk/vol1/fastq/ERR182/007/ERR1824397/ERR1824397_2.fastq.gz	project: FAANG || Material: specimen from organism || organism part: epididymis || specimen collection protocol: http://ftp.faang.ebi.ac.uk/ftp/protocols/samples/ROSLIN_SOP_Harvest_of_Large_Animal_Tissues_20160516.pdf || specimen collection date: 2013-08-02 || animal age at collection: 4 || developmental stage: juvenile stage || health status at collection: normal || fasted status: fed	epididymis	Duroc	juvenile stage	unknown
20	ERS1793660	Sus scrofa	PRJEB19386	ERR1824398	ERX1886686	RNA-Seq	Inverse rRNA	TRANSCRIPTOMIC	PAIRED	14.41	300	ILLUMINA	Illumina HiSeq 2500	https://sra-download.ncbi.nlm.nih.gov/traces/era18/ERR/ERR1824/ERR1824398	ftp://ftp.sra.ebi.ac.uk/vol1/fastq/ERR182/008/ERR1824398/ERR1824398_1.fastq.gz	ftp://ftp.sra.ebi.ac.uk/vol1/fastq/ERR182/008/ERR1824398/ERR1824398_2.fastq.gz	project: FAANG || Material: specimen from organism || organism part: epididymis || specimen collection protocol: http://ftp.faang.ebi.ac.uk/ftp/protocols/samples/ROSLIN_SOP_Harvest_of_Large_Animal_Tissues_20160516.pdf || specimen collection date: 2013-08-02 || animal age at collection: 4 || developmental stage: juvenile stage || health status at collection: normal || fasted status: fed	epididymis	Duroc	juvenile stage	unknown
21	ERS1793661	Sus scrofa	PRJEB19386	ERR1824270	ERX1886689	RNA-Seq	Inverse rRNA	TRANSCRIPTOMIC	PAIRED	19.34	200	ILLUMINA	Illumina HiSeq 2500	https://sra-download.ncbi.nlm.nih.gov/traces/era18/ERR/ERR1824/ERR1824270	ftp://ftp.sra.ebi.ac.uk/vol1/fastq/ERR182/000/ERR1824270/ERR1824270_1.fastq.gz	ftp://ftp.sra.ebi.ac.uk/vol1/fastq/ERR182/000/ERR1824270/ERR1824270_2.fastq.gz	project: FAANG || Material: specimen from organism || organism part: penis || specimen collection protocol: http://ftp.faang.ebi.ac.uk/ftp/protocols/samples/ROSLIN_SOP_Harvest_of_Large_Animal_Tissues_20160516.pdf || specimen collection date: 2013-08-02 || animal age at collection: 4 || developmental stage: juvenile stage || health status at collection: normal || fasted status: fed	penis	Duroc	juvenile stage	unknown
21	ERS1793661	Sus scrofa	PRJEB19386	ERR1824399	ERX1886688	RNA-Seq	Inverse rRNA	TRANSCRIPTOMIC	PAIRED	18.87	300	ILLUMINA	Illumina HiSeq 2500	https://sra-download.ncbi.nlm.nih.gov/traces/era18/ERR/ERR1824/ERR1824399	ftp://ftp.sra.ebi.ac.uk/vol1/fastq/ERR182/009/ERR1824399/ERR1824399_1.fastq.gz	ftp://ftp.sra.ebi.ac.uk/vol1/fastq/ERR182/009/ERR1824399/ERR1824399_2.fastq.gz	project: FAANG || Material: specimen from organism || organism part: penis || specimen collection protocol: http://ftp.faang.ebi.ac.uk/ftp/protocols/samples/ROSLIN_SOP_Harvest_of_Large_Animal_Tissues_20160516.pdf || specimen collection date: 2013-08-02 || animal age at collection: 4 || developmental stage: juvenile stage || health status at collection: normal || fasted status: fed	penis	Duroc	juvenile stage	unknown
21	ERS1793661	Sus scrofa	PRJEB19386	ERR1824400	ERX1886688	RNA-Seq	Inverse rRNA	TRANSCRIPTOMIC	PAIRED	18.89	300	ILLUMINA	Illumina HiSeq 2500	https://sra-download.ncbi.nlm.nih.gov/traces/era18/ERR/ERR1824/ERR1824400	ftp://ftp.sra.ebi.ac.uk/vol1/fastq/ERR182/000/ERR1824400/ERR1824400_1.fastq.gz	ftp://ftp.sra.ebi.ac.uk/vol1/fastq/ERR182/000/ERR1824400/ERR1824400_2.fastq.gz	project: FAANG || Material: specimen from organism || organism part: penis || specimen collection protocol: http://ftp.faang.ebi.ac.uk/ftp/protocols/samples/ROSLIN_SOP_Harvest_of_Large_Animal_Tissues_20160516.pdf || specimen collection date: 2013-08-02 || animal age at collection: 4 || developmental stage: juvenile stage || health status at collection: normal || fasted status: fed	penis	Duroc	juvenile stage	unknown
22	ERS1793662	Sus scrofa	PRJEB19386	ERR1824271	ERX1886690	RNA-Seq	Inverse rRNA	TRANSCRIPTOMIC	PAIRED	17.18	200	ILLUMINA	Illumina HiSeq 2500	https://sra-download.ncbi.nlm.nih.gov/traces/era18/ERR/ERR1824/ERR1824271	ftp://ftp.sra.ebi.ac.uk/vol1/fastq/ERR182/001/ERR1824271/ERR1824271_1.fastq.gz	ftp://ftp.sra.ebi.ac.uk/vol1/fastq/ERR182/001/ERR1824271/ERR1824271_2.fastq.gz	project: FAANG || Material: cell specimen || purification protocol: http://ftp.faang.ebi.ac.uk/ftp/protocols/samples/ ROSLIN_SOP_Isolation_of_Macrophages_from_Lungs_Blood_and_Bone_Marrow_of_Large_Animals_20160516.pdf || cell_type: alveolar macrophage	alveolar macrophage	Duroc	unknown	unknown
23	ERS1793663	Sus scrofa	PRJEB19386	ERR1824272	ERX1886691	RNA-Seq	Inverse rRNA	TRANSCRIPTOMIC	PAIRED	18.34	200	ILLUMINA	Illumina HiSeq 2500	https://sra-download.ncbi.nlm.nih.gov/traces/era18/ERR/ERR1824/ERR1824272	ftp://ftp.sra.ebi.ac.uk/vol1/fastq/ERR182/002/ERR1824272/ERR1824272_1.fastq.gz	ftp://ftp.sra.ebi.ac.uk/vol1/fastq/ERR182/002/ERR1824272/ERR1824272_2.fastq.gz	project: FAANG || Material: specimen from organism || organism part: omentum || specimen collection protocol: http://ftp.faang.ebi.ac.uk/ftp/protocols/samples/ROSLIN_SOP_Harvest_of_Large_Animal_Tissues_20160516.pdf || specimen collection date: 2013-08-02 || animal age at collection: 4 || developmental stage: juvenile stage || health status at collection: normal || fasted status: fed	omentum	Duroc	juvenile stage	unknown
24	ERS1793664	Sus scrofa	PRJEB19386	ERR1824273	ERX1886692	RNA-Seq	Inverse rRNA	TRANSCRIPTOMIC	PAIRED	16.38	200	ILLUMINA	Illumina HiSeq 2500	https://sra-download.ncbi.nlm.nih.gov/traces/era18/ERR/ERR1824/ERR1824273	ftp://ftp.sra.ebi.ac.uk/vol1/fastq/ERR182/003/ERR1824273/ERR1824273_1.fastq.gz	ftp://ftp.sra.ebi.ac.uk/vol1/fastq/ERR182/003/ERR1824273/ERR1824273_2.fastq.gz	project: FAANG || Material: specimen from organism || organism part: skeletal muscle tissue || specimen collection protocol: http://ftp.faang.ebi.ac.uk/ftp/protocols/samples/ROSLIN_SOP_Harvest_of_Large_Animal_Tissues_20160516.pdf || specimen collection date: 2013-08-02 || animal age at collection: 4 || developmental stage: juvenile stage || health status at collection: normal || fasted status: fed	skeletal muscle tissue	Duroc	juvenile stage	unknown
25	ERS1793665	Sus scrofa	PRJEB19386	ERR1824407	ERX1886693	RNA-Seq	Inverse rRNA	TRANSCRIPTOMIC	PAIRED	10.26	300	ILLUMINA	Illumina HiSeq 2500	https://sra-download.ncbi.nlm.nih.gov/traces/era18/ERR/ERR1824/ERR1824407	ftp://ftp.sra.ebi.ac.uk/vol1/fastq/ERR182/007/ERR1824407/ERR1824407_1.fastq.gz	ftp://ftp.sra.ebi.ac.uk/vol1/fastq/ERR182/007/ERR1824407/ERR1824407_2.fastq.gz	project: FAANG || Material: specimen from organism || organism part: pituitary gland || specimen collection protocol: http://ftp.faang.ebi.ac.uk/ftp/protocols/samples/ROSLIN_SOP_Harvest_of_Large_Animal_Tissues_20160516.pdf || specimen collection date: 2013-10-29 || animal age at collection: 5 || developmental stage: juvenile stage || health status at collection: normal || fasted status: fed	pituitary gland	Duroc	juvenile stage	unknown
25	ERS1793665	Sus scrofa	PRJEB19386	ERR1824408	ERX1886693	RNA-Seq	Inverse rRNA	TRANSCRIPTOMIC	PAIRED	10.32	300	ILLUMINA	Illumina HiSeq 2500	https://sra-download.ncbi.nlm.nih.gov/traces/era18/ERR/ERR1824/ERR1824408	ftp://ftp.sra.ebi.ac.uk/vol1/fastq/ERR182/008/ERR1824408/ERR1824408_1.fastq.gz	ftp://ftp.sra.ebi.ac.uk/vol1/fastq/ERR182/008/ERR1824408/ERR1824408_2.fastq.gz	project: FAANG || Material: specimen from organism || organism part: pituitary gland || specimen collection protocol: http://ftp.faang.ebi.ac.uk/ftp/protocols/samples/ROSLIN_SOP_Harvest_of_Large_Animal_Tissues_20160516.pdf || specimen collection date: 2013-10-29 || animal age at collection: 5 || developmental stage: juvenile stage || health status at collection: normal || fasted status: fed	pituitary gland	Duroc	juvenile stage	unknown
26	ERS1793666	Sus scrofa	PRJEB19386	ERR1824409	ERX1886694	RNA-Seq	Inverse rRNA	TRANSCRIPTOMIC	PAIRED	14.81	300	ILLUMINA	Illumina HiSeq 2500	https://sra-download.ncbi.nlm.nih.gov/traces/era18/ERR/ERR1824/ERR1824409	ftp://ftp.sra.ebi.ac.uk/vol1/fastq/ERR182/009/ERR1824409/ERR1824409_1.fastq.gz	ftp://ftp.sra.ebi.ac.uk/vol1/fastq/ERR182/009/ERR1824409/ERR1824409_2.fastq.gz	project: FAANG || Material: specimen from organism || organism part: colon || specimen collection protocol: http://ftp.faang.ebi.ac.uk/ftp/protocols/samples/ROSLIN_SOP_Harvest_of_Large_Animal_Tissues_20160516.pdf || specimen collection date: 2013-10-29 || animal age at collection: 5 || developmental stage: juvenile stage || health status at collection: normal || fasted status: fed	colon	Duroc	juvenile stage	unknown
26	ERS1793666	Sus scrofa	PRJEB19386	ERR1824410	ERX1886694	RNA-Seq	Inverse rRNA	TRANSCRIPTOMIC	PAIRED	14.61	300	ILLUMINA	Illumina HiSeq 2500	https://sra-download.ncbi.nlm.nih.gov/traces/era18/ERR/ERR1824/ERR1824410	ftp://ftp.sra.ebi.ac.uk/vol1/fastq/ERR182/000/ERR1824410/ERR1824410_1.fastq.gz	ftp://ftp.sra.ebi.ac.uk/vol1/fastq/ERR182/000/ERR1824410/ERR1824410_2.fastq.gz	project: FAANG || Material: specimen from organism || organism part: colon || specimen collection protocol: http://ftp.faang.ebi.ac.uk/ftp/protocols/samples/ROSLIN_SOP_Harvest_of_Large_Animal_Tissues_20160516.pdf || specimen collection date: 2013-10-29 || animal age at collection: 5 || developmental stage: juvenile stage || health status at collection: normal || fasted status: fed	colon	Duroc	juvenile stage	unknown
27	ERS1793668	Sus scrofa	PRJEB19386	ERR1824413	ERX1886696	RNA-Seq	Inverse rRNA	TRANSCRIPTOMIC	PAIRED	11.12	300	ILLUMINA	Illumina HiSeq 2500	https://sra-download.ncbi.nlm.nih.gov/traces/era18/ERR/ERR1824/ERR1824413	ftp://ftp.sra.ebi.ac.uk/vol1/fastq/ERR182/003/ERR1824413/ERR1824413_1.fastq.gz	ftp://ftp.sra.ebi.ac.uk/vol1/fastq/ERR182/003/ERR1824413/ERR1824413_2.fastq.gz	project: FAANG || Material: specimen from organism || organism part: ileum || specimen collection protocol: http://ftp.faang.ebi.ac.uk/ftp/protocols/samples/ROSLIN_SOP_Harvest_of_Large_Animal_Tissues_20160516.pdf || specimen collection date: 2013-10-29 || animal age at collection: 5 || developmental stage: juvenile stage || health status at collection: normal || fasted status: fed	ileum	Duroc	juvenile stage	unknown
27	ERS1793668	Sus scrofa	PRJEB19386	ERR1824414	ERX1886696	RNA-Seq	Inverse rRNA	TRANSCRIPTOMIC	PAIRED	11.17	300	ILLUMINA	Illumina HiSeq 2500	https://sra-download.ncbi.nlm.nih.gov/traces/era18/ERR/ERR1824/ERR1824414	ftp://ftp.sra.ebi.ac.uk/vol1/fastq/ERR182/004/ERR1824414/ERR1824414_1.fastq.gz	ftp://ftp.sra.ebi.ac.uk/vol1/fastq/ERR182/004/ERR1824414/ERR1824414_2.fastq.gz	project: FAANG || Material: specimen from organism || organism part: ileum || specimen collection protocol: http://ftp.faang.ebi.ac.uk/ftp/protocols/samples/ROSLIN_SOP_Harvest_of_Large_Animal_Tissues_20160516.pdf || specimen collection date: 2013-10-29 || animal age at collection: 5 || developmental stage: juvenile stage || health status at collection: normal || fasted status: fed	ileum	Duroc	juvenile stage	unknown
28	ERS1793669	Sus scrofa	PRJEB19386	ERR1824415	ERX1886697	RNA-Seq	Inverse rRNA	TRANSCRIPTOMIC	PAIRED	14.49	300	ILLUMINA	Illumina HiSeq 2500	https://sra-download.ncbi.nlm.nih.gov/traces/era18/ERR/ERR1824/ERR1824415	ftp://ftp.sra.ebi.ac.uk/vol1/fastq/ERR182/005/ERR1824415/ERR1824415_1.fastq.gz	ftp://ftp.sra.ebi.ac.uk/vol1/fastq/ERR182/005/ERR1824415/ERR1824415_2.fastq.gz	project: FAANG || Material: specimen from organism || organism part: stomach || specimen collection protocol: http://ftp.faang.ebi.ac.uk/ftp/protocols/samples/ROSLIN_SOP_Harvest_of_Large_Animal_Tissues_20160516.pdf || specimen collection date: 2013-10-29 || animal age at collection: 5 || developmental stage: juvenile stage || health status at collection: normal || fasted status: fed	stomach	Duroc	juvenile stage	unknown
28	ERS1793669	Sus scrofa	PRJEB19386	ERR1824416	ERX1886697	RNA-Seq	Inverse rRNA	TRANSCRIPTOMIC	PAIRED	14.5	300	ILLUMINA	Illumina HiSeq 2500	https://sra-download.ncbi.nlm.nih.gov/traces/era18/ERR/ERR1824/ERR1824416	ftp://ftp.sra.ebi.ac.uk/vol1/fastq/ERR182/006/ERR1824416/ERR1824416_1.fastq.gz	ftp://ftp.sra.ebi.ac.uk/vol1/fastq/ERR182/006/ERR1824416/ERR1824416_2.fastq.gz	project: FAANG || Material: specimen from organism || organism part: stomach || specimen collection protocol: http://ftp.faang.ebi.ac.uk/ftp/protocols/samples/ROSLIN_SOP_Harvest_of_Large_Animal_Tissues_20160516.pdf || specimen collection date: 2013-10-29 || animal age at collection: 5 || developmental stage: juvenile stage || health status at collection: normal || fasted status: fed	stomach	Duroc	juvenile stage	unknown
29	ERS1793670	Sus scrofa	PRJEB19386	ERR1824427	ERX1886698	RNA-Seq	Inverse rRNA	TRANSCRIPTOMIC	PAIRED	11.21	300	ILLUMINA	Illumina HiSeq 2500	https://sra-download.ncbi.nlm.nih.gov/traces/era18/ERR/ERR1824/ERR1824427	ftp://ftp.sra.ebi.ac.uk/vol1/fastq/ERR182/007/ERR1824427/ERR1824427_1.fastq.gz	ftp://ftp.sra.ebi.ac.uk/vol1/fastq/ERR182/007/ERR1824427/ERR1824427_2.fastq.gz	project: FAANG || Material: specimen from organism || organism part: hippocampal formation || specimen collection protocol: http://ftp.faang.ebi.ac.uk/ftp/protocols/samples/ROSLIN_SOP_Harvest_of_Large_Animal_Tissues_20160516.pdf || specimen collection date: 2013-10-29 || animal age at collection: 5 || developmental stage: juvenile stage || health status at collection: normal || fasted status: fed	hippocampal formation	Duroc	juvenile stage	unknown
29	ERS1793670	Sus scrofa	PRJEB19386	ERR1824428	ERX1886698	RNA-Seq	Inverse rRNA	TRANSCRIPTOMIC	PAIRED	10.98	300	ILLUMINA	Illumina HiSeq 2500	https://sra-download.ncbi.nlm.nih.gov/traces/era18/ERR/ERR1824/ERR1824428	ftp://ftp.sra.ebi.ac.uk/vol1/fastq/ERR182/008/ERR1824428/ERR1824428_1.fastq.gz	ftp://ftp.sra.ebi.ac.uk/vol1/fastq/ERR182/008/ERR1824428/ERR1824428_2.fastq.gz	project: FAANG || Material: specimen from organism || organism part: hippocampal formation || specimen collection protocol: http://ftp.faang.ebi.ac.uk/ftp/protocols/samples/ROSLIN_SOP_Harvest_of_Large_Animal_Tissues_20160516.pdf || specimen collection date: 2013-10-29 || animal age at collection: 5 || developmental stage: juvenile stage || health status at collection: normal || fasted status: fed	hippocampal formation	Duroc	juvenile stage	unknown
30	ERS1793671	Sus scrofa	PRJEB19386	ERR1824417	ERX1886699	RNA-Seq	Inverse rRNA	TRANSCRIPTOMIC	PAIRED	18.98	300	ILLUMINA	Illumina HiSeq 2500	https://sra-download.ncbi.nlm.nih.gov/traces/era18/ERR/ERR1824/ERR1824417	ftp://ftp.sra.ebi.ac.uk/vol1/fastq/ERR182/007/ERR1824417/ERR1824417_1.fastq.gz	ftp://ftp.sra.ebi.ac.uk/vol1/fastq/ERR182/007/ERR1824417/ERR1824417_2.fastq.gz	project: FAANG || Material: specimen from organism || organism part: pituitary gland || specimen collection protocol: http://ftp.faang.ebi.ac.uk/ftp/protocols/samples/ROSLIN_SOP_Harvest_of_Large_Animal_Tissues_20160516.pdf || specimen collection date: 2013-10-30 || animal age at collection: 3 || developmental stage: juvenile stage || health status at collection: normal || fasted status: fed	pituitary gland	Duroc	juvenile stage	unknown
30	ERS1793671	Sus scrofa	PRJEB19386	ERR1824418	ERX1886699	RNA-Seq	Inverse rRNA	TRANSCRIPTOMIC	PAIRED	19.13	300	ILLUMINA	Illumina HiSeq 2500	https://sra-download.ncbi.nlm.nih.gov/traces/era18/ERR/ERR1824/ERR1824418	ftp://ftp.sra.ebi.ac.uk/vol1/fastq/ERR182/008/ERR1824418/ERR1824418_1.fastq.gz	ftp://ftp.sra.ebi.ac.uk/vol1/fastq/ERR182/008/ERR1824418/ERR1824418_2.fastq.gz	project: FAANG || Material: specimen from organism || organism part: pituitary gland || specimen collection protocol: http://ftp.faang.ebi.ac.uk/ftp/protocols/samples/ROSLIN_SOP_Harvest_of_Large_Animal_Tissues_20160516.pdf || specimen collection date: 2013-10-30 || animal age at collection: 3 || developmental stage: juvenile stage || health status at collection: normal || fasted status: fed	pituitary gland	Duroc	juvenile stage	unknown
31	ERS1793672	Sus scrofa	PRJEB19386	ERR1824419	ERX1886700	RNA-Seq	Inverse rRNA	TRANSCRIPTOMIC	PAIRED	22.53	300	ILLUMINA	Illumina HiSeq 2500	https://sra-download.ncbi.nlm.nih.gov/traces/era18/ERR/ERR1824/ERR1824419	ftp://ftp.sra.ebi.ac.uk/vol1/fastq/ERR182/009/ERR1824419/ERR1824419_1.fastq.gz	ftp://ftp.sra.ebi.ac.uk/vol1/fastq/ERR182/009/ERR1824419/ERR1824419_2.fastq.gz	project: FAANG || Material: specimen from organism || organism part: colon || specimen collection protocol: http://ftp.faang.ebi.ac.uk/ftp/protocols/samples/ROSLIN_SOP_Harvest_of_Large_Animal_Tissues_20160516.pdf || specimen collection date: 2013-10-30 || animal age at collection: 3 || developmental stage: juvenile stage || health status at collection: normal || fasted status: fed	colon	Duroc	juvenile stage	unknown
31	ERS1793672	Sus scrofa	PRJEB19386	ERR1824420	ERX1886700	RNA-Seq	Inverse rRNA	TRANSCRIPTOMIC	PAIRED	22.46	300	ILLUMINA	Illumina HiSeq 2500	https://sra-download.ncbi.nlm.nih.gov/traces/era18/ERR/ERR1824/ERR1824420	ftp://ftp.sra.ebi.ac.uk/vol1/fastq/ERR182/000/ERR1824420/ERR1824420_1.fastq.gz	ftp://ftp.sra.ebi.ac.uk/vol1/fastq/ERR182/000/ERR1824420/ERR1824420_2.fastq.gz	project: FAANG || Material: specimen from organism || organism part: colon || specimen collection protocol: http://ftp.faang.ebi.ac.uk/ftp/protocols/samples/ROSLIN_SOP_Harvest_of_Large_Animal_Tissues_20160516.pdf || specimen collection date: 2013-10-30 || animal age at collection: 3 || developmental stage: juvenile stage || health status at collection: normal || fasted status: fed	colon	Duroc	juvenile stage	unknown
32	ERS1793673	Sus scrofa	PRJEB19386	ERR1824421	ERX1886701	RNA-Seq	Inverse rRNA	TRANSCRIPTOMIC	PAIRED	14.68	300	ILLUMINA	Illumina HiSeq 2500	https://sra-download.ncbi.nlm.nih.gov/traces/era18/ERR/ERR1824/ERR1824421	ftp://ftp.sra.ebi.ac.uk/vol1/fastq/ERR182/001/ERR1824421/ERR1824421_1.fastq.gz	ftp://ftp.sra.ebi.ac.uk/vol1/fastq/ERR182/001/ERR1824421/ERR1824421_2.fastq.gz	project: FAANG || Material: specimen from organism || organism part: duodenum || specimen collection protocol: http://ftp.faang.ebi.ac.uk/ftp/protocols/samples/ROSLIN_SOP_Harvest_of_Large_Animal_Tissues_20160516.pdf || specimen collection date: 2013-10-30 || animal age at collection: 3 || developmental stage: juvenile stage || health status at collection: normal || fasted status: fed	duodenum	Duroc	juvenile stage	unknown
32	ERS1793673	Sus scrofa	PRJEB19386	ERR1824422	ERX1886701	RNA-Seq	Inverse rRNA	TRANSCRIPTOMIC	PAIRED	14.62	300	ILLUMINA	Illumina HiSeq 2500	https://sra-download.ncbi.nlm.nih.gov/traces/era18/ERR/ERR1824/ERR1824422	ftp://ftp.sra.ebi.ac.uk/vol1/fastq/ERR182/002/ERR1824422/ERR1824422_1.fastq.gz	ftp://ftp.sra.ebi.ac.uk/vol1/fastq/ERR182/002/ERR1824422/ERR1824422_2.fastq.gz	project: FAANG || Material: specimen from organism || organism part: duodenum || specimen collection protocol: http://ftp.faang.ebi.ac.uk/ftp/protocols/samples/ROSLIN_SOP_Harvest_of_Large_Animal_Tissues_20160516.pdf || specimen collection date: 2013-10-30 || animal age at collection: 3 || developmental stage: juvenile stage || health status at collection: normal || fasted status: fed	duodenum	Duroc	juvenile stage	unknown
32	ERS1793673	Sus scrofa	PRJEB19386	ERR1824503	ERX1886701	RNA-Seq	Inverse rRNA	TRANSCRIPTOMIC	PAIRED	60.95	300	ILLUMINA	Illumina HiSeq 2500	https://sra-download.ncbi.nlm.nih.gov/traces/era18/ERR/ERR1824/ERR1824503	ftp://ftp.sra.ebi.ac.uk/vol1/fastq/ERR182/003/ERR1824503/ERR1824503_1.fastq.gz	ftp://ftp.sra.ebi.ac.uk/vol1/fastq/ERR182/003/ERR1824503/ERR1824503_2.fastq.gz	project: FAANG || Material: specimen from organism || organism part: duodenum || specimen collection protocol: http://ftp.faang.ebi.ac.uk/ftp/protocols/samples/ROSLIN_SOP_Harvest_of_Large_Animal_Tissues_20160516.pdf || specimen collection date: 2013-10-30 || animal age at collection: 3 || developmental stage: juvenile stage || health status at collection: normal || fasted status: fed	duodenum	Duroc	juvenile stage	unknown
32	ERS1793673	Sus scrofa	PRJEB19386	ERR1824504	ERX1886701	RNA-Seq	Inverse rRNA	TRANSCRIPTOMIC	PAIRED	60.33	300	ILLUMINA	Illumina HiSeq 2500	https://sra-download.ncbi.nlm.nih.gov/traces/era18/ERR/ERR1824/ERR1824504	ftp://ftp.sra.ebi.ac.uk/vol1/fastq/ERR182/004/ERR1824504/ERR1824504_1.fastq.gz	ftp://ftp.sra.ebi.ac.uk/vol1/fastq/ERR182/004/ERR1824504/ERR1824504_2.fastq.gz	project: FAANG || Material: specimen from organism || organism part: duodenum || specimen collection protocol: http://ftp.faang.ebi.ac.uk/ftp/protocols/samples/ROSLIN_SOP_Harvest_of_Large_Animal_Tissues_20160516.pdf || specimen collection date: 2013-10-30 || animal age at collection: 3 || developmental stage: juvenile stage || health status at collection: normal || fasted status: fed	duodenum	Duroc	juvenile stage	unknown
33	ERS1793674	Sus scrofa	PRJEB19386	ERR1824423	ERX1886702	RNA-Seq	Inverse rRNA	TRANSCRIPTOMIC	PAIRED	16.54	300	ILLUMINA	Illumina HiSeq 2500	https://sra-download.ncbi.nlm.nih.gov/traces/era18/ERR/ERR1824/ERR1824423	ftp://ftp.sra.ebi.ac.uk/vol1/fastq/ERR182/003/ERR1824423/ERR1824423_1.fastq.gz	ftp://ftp.sra.ebi.ac.uk/vol1/fastq/ERR182/003/ERR1824423/ERR1824423_2.fastq.gz	project: FAANG || Material: specimen from organism || organism part: ileum || specimen collection protocol: http://ftp.faang.ebi.ac.uk/ftp/protocols/samples/ROSLIN_SOP_Harvest_of_Large_Animal_Tissues_20160516.pdf || specimen collection date: 2013-10-30 || animal age at collection: 3 || developmental stage: juvenile stage || health status at collection: normal || fasted status: fed	ileum	Duroc	juvenile stage	unknown
33	ERS1793674	Sus scrofa	PRJEB19386	ERR1824424	ERX1886702	RNA-Seq	Inverse rRNA	TRANSCRIPTOMIC	PAIRED	16.52	300	ILLUMINA	Illumina HiSeq 2500	https://sra-download.ncbi.nlm.nih.gov/traces/era18/ERR/ERR1824/ERR1824424	ftp://ftp.sra.ebi.ac.uk/vol1/fastq/ERR182/004/ERR1824424/ERR1824424_1.fastq.gz	ftp://ftp.sra.ebi.ac.uk/vol1/fastq/ERR182/004/ERR1824424/ERR1824424_2.fastq.gz	project: FAANG || Material: specimen from organism || organism part: ileum || specimen collection protocol: http://ftp.faang.ebi.ac.uk/ftp/protocols/samples/ROSLIN_SOP_Harvest_of_Large_Animal_Tissues_20160516.pdf || specimen collection date: 2013-10-30 || animal age at collection: 3 || developmental stage: juvenile stage || health status at collection: normal || fasted status: fed	ileum	Duroc	juvenile stage	unknown
34	ERS1793675	Sus scrofa	PRJEB19386	ERR1824425	ERX1886703	RNA-Seq	Inverse rRNA	TRANSCRIPTOMIC	PAIRED	10.69	300	ILLUMINA	Illumina HiSeq 2500	https://sra-download.ncbi.nlm.nih.gov/traces/era18/ERR/ERR1824/ERR1824425	ftp://ftp.sra.ebi.ac.uk/vol1/fastq/ERR182/005/ERR1824425/ERR1824425_1.fastq.gz	ftp://ftp.sra.ebi.ac.uk/vol1/fastq/ERR182/005/ERR1824425/ERR1824425_2.fastq.gz	project: FAANG || Material: specimen from organism || organism part: stomach || specimen collection protocol: http://ftp.faang.ebi.ac.uk/ftp/protocols/samples/ROSLIN_SOP_Harvest_of_Large_Animal_Tissues_20160516.pdf || specimen collection date: 2013-10-30 || animal age at collection: 3 || developmental stage: juvenile stage || health status at collection: normal || fasted status: fed	stomach	Duroc	juvenile stage	unknown
34	ERS1793675	Sus scrofa	PRJEB19386	ERR1824426	ERX1886703	RNA-Seq	Inverse rRNA	TRANSCRIPTOMIC	PAIRED	10.74	300	ILLUMINA	Illumina HiSeq 2500	https://sra-download.ncbi.nlm.nih.gov/traces/era18/ERR/ERR1824/ERR1824426	ftp://ftp.sra.ebi.ac.uk/vol1/fastq/ERR182/006/ERR1824426/ERR1824426_1.fastq.gz	ftp://ftp.sra.ebi.ac.uk/vol1/fastq/ERR182/006/ERR1824426/ERR1824426_2.fastq.gz	project: FAANG || Material: specimen from organism || organism part: stomach || specimen collection protocol: http://ftp.faang.ebi.ac.uk/ftp/protocols/samples/ROSLIN_SOP_Harvest_of_Large_Animal_Tissues_20160516.pdf || specimen collection date: 2013-10-30 || animal age at collection: 3 || developmental stage: juvenile stage || health status at collection: normal || fasted status: fed	stomach	Duroc	juvenile stage	unknown
35	ERS1793676	Sus scrofa	PRJEB19386	ERR1824429	ERX1886704	RNA-Seq	Inverse rRNA	TRANSCRIPTOMIC	PAIRED	15.27	300	ILLUMINA	Illumina HiSeq 2500	https://sra-download.ncbi.nlm.nih.gov/traces/era18/ERR/ERR1824/ERR1824429	ftp://ftp.sra.ebi.ac.uk/vol1/fastq/ERR182/009/ERR1824429/ERR1824429_1.fastq.gz	ftp://ftp.sra.ebi.ac.uk/vol1/fastq/ERR182/009/ERR1824429/ERR1824429_2.fastq.gz	project: FAANG || Material: specimen from organism || organism part: amygdala || specimen collection protocol: http://ftp.faang.ebi.ac.uk/ftp/protocols/samples/ROSLIN_SOP_Harvest_of_Large_Animal_Tissues_20160516.pdf || specimen collection date: 2013-10-30 || animal age at collection: 3 || developmental stage: juvenile stage || health status at collection: normal || fasted status: fed	amygdala	Duroc	juvenile stage	unknown
35	ERS1793676	Sus scrofa	PRJEB19386	ERR1824430	ERX1886704	RNA-Seq	Inverse rRNA	TRANSCRIPTOMIC	PAIRED	15.59	300	ILLUMINA	Illumina HiSeq 2500	https://sra-download.ncbi.nlm.nih.gov/traces/era18/ERR/ERR1824/ERR1824430	ftp://ftp.sra.ebi.ac.uk/vol1/fastq/ERR182/000/ERR1824430/ERR1824430_1.fastq.gz	ftp://ftp.sra.ebi.ac.uk/vol1/fastq/ERR182/000/ERR1824430/ERR1824430_2.fastq.gz	project: FAANG || Material: specimen from organism || organism part: amygdala || specimen collection protocol: http://ftp.faang.ebi.ac.uk/ftp/protocols/samples/ROSLIN_SOP_Harvest_of_Large_Animal_Tissues_20160516.pdf || specimen collection date: 2013-10-30 || animal age at collection: 3 || developmental stage: juvenile stage || health status at collection: normal || fasted status: fed	amygdala	Duroc	juvenile stage	unknown
36	ERS1793677	Sus scrofa	PRJEB19386	ERR1824481	ERX1886705	RNA-Seq	Inverse rRNA	TRANSCRIPTOMIC	PAIRED	20.88	300	ILLUMINA	Illumina HiSeq 2500	https://sra-download.ncbi.nlm.nih.gov/traces/era18/ERR/ERR1824/ERR1824481	ftp://ftp.sra.ebi.ac.uk/vol1/fastq/ERR182/001/ERR1824481/ERR1824481_1.fastq.gz	ftp://ftp.sra.ebi.ac.uk/vol1/fastq/ERR182/001/ERR1824481/ERR1824481_2.fastq.gz	project: FAANG || Material: cell specimen || purification protocol: http://ftp.faang.ebi.ac.uk/ftp/protocols/samples/ ROSLIN_SOP_Isolation_of_Macrophages_from_Lungs_Blood_and_Bone_Marrow_of_Large_Animals_20160516.pdf || cell_type: alveolar macrophage	alveolar macrophage	Duroc	unknown	unknown
36	ERS1793677	Sus scrofa	PRJEB19386	ERR1824482	ERX1886705	RNA-Seq	Inverse rRNA	TRANSCRIPTOMIC	PAIRED	20.6	300	ILLUMINA	Illumina HiSeq 2500	https://sra-download.ncbi.nlm.nih.gov/traces/era18/ERR/ERR1824/ERR1824482	ftp://ftp.sra.ebi.ac.uk/vol1/fastq/ERR182/002/ERR1824482/ERR1824482_1.fastq.gz	ftp://ftp.sra.ebi.ac.uk/vol1/fastq/ERR182/002/ERR1824482/ERR1824482_2.fastq.gz	project: FAANG || Material: cell specimen || purification protocol: http://ftp.faang.ebi.ac.uk/ftp/protocols/samples/ ROSLIN_SOP_Isolation_of_Macrophages_from_Lungs_Blood_and_Bone_Marrow_of_Large_Animals_20160516.pdf || cell_type: alveolar macrophage	alveolar macrophage	Duroc	unknown	unknown
36	ERS1793677	Sus scrofa	PRJEB19386	ERR1824541	ERX1886705	RNA-Seq	Inverse rRNA	TRANSCRIPTOMIC	PAIRED	13.14	300	ILLUMINA	Illumina HiSeq 2500	https://sra-download.ncbi.nlm.nih.gov/traces/era18/ERR/ERR1824/ERR1824541	ftp://ftp.sra.ebi.ac.uk/vol1/fastq/ERR182/001/ERR1824541/ERR1824541_1.fastq.gz	ftp://ftp.sra.ebi.ac.uk/vol1/fastq/ERR182/001/ERR1824541/ERR1824541_2.fastq.gz	project: FAANG || Material: cell specimen || purification protocol: http://ftp.faang.ebi.ac.uk/ftp/protocols/samples/ ROSLIN_SOP_Isolation_of_Macrophages_from_Lungs_Blood_and_Bone_Marrow_of_Large_Animals_20160516.pdf || cell_type: alveolar macrophage	alveolar macrophage	Duroc	unknown	unknown
36	ERS1793677	Sus scrofa	PRJEB19386	ERR1824542	ERX1886705	RNA-Seq	Inverse rRNA	TRANSCRIPTOMIC	PAIRED	13.23	300	ILLUMINA	Illumina HiSeq 2500	https://sra-download.ncbi.nlm.nih.gov/traces/era18/ERR/ERR1824/ERR1824542	ftp://ftp.sra.ebi.ac.uk/vol1/fastq/ERR182/002/ERR1824542/ERR1824542_1.fastq.gz	ftp://ftp.sra.ebi.ac.uk/vol1/fastq/ERR182/002/ERR1824542/ERR1824542_2.fastq.gz	project: FAANG || Material: cell specimen || purification protocol: http://ftp.faang.ebi.ac.uk/ftp/protocols/samples/ ROSLIN_SOP_Isolation_of_Macrophages_from_Lungs_Blood_and_Bone_Marrow_of_Large_Animals_20160516.pdf || cell_type: alveolar macrophage	alveolar macrophage	Duroc	unknown	unknown
37	ERS1793678	Sus scrofa	PRJEB19386	ERR1824403	ERX1886706	RNA-Seq	Inverse rRNA	TRANSCRIPTOMIC	PAIRED	14.21	300	ILLUMINA	Illumina HiSeq 2500	https://sra-download.ncbi.nlm.nih.gov/traces/era18/ERR/ERR1824/ERR1824403	ftp://ftp.sra.ebi.ac.uk/vol1/fastq/ERR182/003/ERR1824403/ERR1824403_1.fastq.gz	ftp://ftp.sra.ebi.ac.uk/vol1/fastq/ERR182/003/ERR1824403/ERR1824403_2.fastq.gz	project: FAANG || Material: specimen from organism || organism part: caecum || specimen collection protocol: http://ftp.faang.ebi.ac.uk/ftp/protocols/samples/ROSLIN_SOP_Harvest_of_Large_Animal_Tissues_20160516.pdf || specimen collection date: 2013-08-02 || animal age at collection: 4 || developmental stage: juvenile stage || health status at collection: normal || fasted status: fed	caecum	Duroc	juvenile stage	unknown
37	ERS1793678	Sus scrofa	PRJEB19386	ERR1824404	ERX1886706	RNA-Seq	Inverse rRNA	TRANSCRIPTOMIC	PAIRED	14.19	300	ILLUMINA	Illumina HiSeq 2500	https://sra-download.ncbi.nlm.nih.gov/traces/era18/ERR/ERR1824/ERR1824404	ftp://ftp.sra.ebi.ac.uk/vol1/fastq/ERR182/004/ERR1824404/ERR1824404_1.fastq.gz	ftp://ftp.sra.ebi.ac.uk/vol1/fastq/ERR182/004/ERR1824404/ERR1824404_2.fastq.gz	project: FAANG || Material: specimen from organism || organism part: caecum || specimen collection protocol: http://ftp.faang.ebi.ac.uk/ftp/protocols/samples/ROSLIN_SOP_Harvest_of_Large_Animal_Tissues_20160516.pdf || specimen collection date: 2013-08-02 || animal age at collection: 4 || developmental stage: juvenile stage || health status at collection: normal || fasted status: fed	caecum	Duroc	juvenile stage	unknown
38	ERS1793679	Sus scrofa	PRJEB19386	ERR1824405	ERX1886707	RNA-Seq	Inverse rRNA	TRANSCRIPTOMIC	PAIRED	12.69	300	ILLUMINA	Illumina HiSeq 2500	https://sra-download.ncbi.nlm.nih.gov/traces/era18/ERR/ERR1824/ERR1824405	ftp://ftp.sra.ebi.ac.uk/vol1/fastq/ERR182/005/ERR1824405/ERR1824405_1.fastq.gz	ftp://ftp.sra.ebi.ac.uk/vol1/fastq/ERR182/005/ERR1824405/ERR1824405_2.fastq.gz	project: FAANG || Material: cell specimen || purification protocol: http://ftp.faang.ebi.ac.uk/ftp/protocols/samples/ ROSLIN_SOP_Isolation_of_Macrophages_from_Lungs_Blood_and_Bone_Marrow_of_Large_Animals_20160516.pdf || cell_type: alveolar macrophage	alveolar macrophage	Duroc	unknown	unknown
38	ERS1793679	Sus scrofa	PRJEB19386	ERR1824406	ERX1886707	RNA-Seq	Inverse rRNA	TRANSCRIPTOMIC	PAIRED	12.65	300	ILLUMINA	Illumina HiSeq 2500	https://sra-download.ncbi.nlm.nih.gov/traces/era18/ERR/ERR1824/ERR1824406	ftp://ftp.sra.ebi.ac.uk/vol1/fastq/ERR182/006/ERR1824406/ERR1824406_1.fastq.gz	ftp://ftp.sra.ebi.ac.uk/vol1/fastq/ERR182/006/ERR1824406/ERR1824406_2.fastq.gz	project: FAANG || Material: cell specimen || purification protocol: http://ftp.faang.ebi.ac.uk/ftp/protocols/samples/ ROSLIN_SOP_Isolation_of_Macrophages_from_Lungs_Blood_and_Bone_Marrow_of_Large_Animals_20160516.pdf || cell_type: alveolar macrophage	alveolar macrophage	Duroc	unknown	unknown
38	ERS1793679	Sus scrofa	PRJEB19386	ERR1824485	ERX1886707	RNA-Seq	Inverse rRNA	TRANSCRIPTOMIC	PAIRED	14.15	300	ILLUMINA	Illumina HiSeq 2500	https://sra-download.ncbi.nlm.nih.gov/traces/era18/ERR/ERR1824/ERR1824485	ftp://ftp.sra.ebi.ac.uk/vol1/fastq/ERR182/005/ERR1824485/ERR1824485_1.fastq.gz	ftp://ftp.sra.ebi.ac.uk/vol1/fastq/ERR182/005/ERR1824485/ERR1824485_2.fastq.gz	project: FAANG || Material: cell specimen || purification protocol: http://ftp.faang.ebi.ac.uk/ftp/protocols/samples/ ROSLIN_SOP_Isolation_of_Macrophages_from_Lungs_Blood_and_Bone_Marrow_of_Large_Animals_20160516.pdf || cell_type: alveolar macrophage	alveolar macrophage	Duroc	unknown	unknown
38	ERS1793679	Sus scrofa	PRJEB19386	ERR1824486	ERX1886707	RNA-Seq	Inverse rRNA	TRANSCRIPTOMIC	PAIRED	14.35	300	ILLUMINA	Illumina HiSeq 2500	https://sra-download.ncbi.nlm.nih.gov/traces/era18/ERR/ERR1824/ERR1824486	ftp://ftp.sra.ebi.ac.uk/vol1/fastq/ERR182/006/ERR1824486/ERR1824486_1.fastq.gz	ftp://ftp.sra.ebi.ac.uk/vol1/fastq/ERR182/006/ERR1824486/ERR1824486_2.fastq.gz	project: FAANG || Material: cell specimen || purification protocol: http://ftp.faang.ebi.ac.uk/ftp/protocols/samples/ ROSLIN_SOP_Isolation_of_Macrophages_from_Lungs_Blood_and_Bone_Marrow_of_Large_Animals_20160516.pdf || cell_type: alveolar macrophage	alveolar macrophage	Duroc	unknown	unknown
39	ERS1793681	Sus scrofa	PRJEB19386	ERR1824433	ERX1886709	RNA-Seq	Inverse rRNA	TRANSCRIPTOMIC	PAIRED	11.6	300	ILLUMINA	Illumina HiSeq 2500	https://sra-download.ncbi.nlm.nih.gov/traces/era18/ERR/ERR1824/ERR1824433	ftp://ftp.sra.ebi.ac.uk/vol1/fastq/ERR182/003/ERR1824433/ERR1824433_1.fastq.gz	ftp://ftp.sra.ebi.ac.uk/vol1/fastq/ERR182/003/ERR1824433/ERR1824433_2.fastq.gz	project: FAANG || Material: specimen from organism || organism part: occipital cortex || specimen collection protocol: http://ftp.faang.ebi.ac.uk/ftp/protocols/samples/ROSLIN_SOP_Harvest_of_Large_Animal_Tissues_20160516.pdf || specimen collection date: 2013-10-29 || animal age at collection: 5 || developmental stage: juvenile stage || health status at collection: normal || fasted status: fed	occipital cortex	Duroc	juvenile stage	unknown
39	ERS1793681	Sus scrofa	PRJEB19386	ERR1824434	ERX1886709	RNA-Seq	Inverse rRNA	TRANSCRIPTOMIC	PAIRED	11.83	300	ILLUMINA	Illumina HiSeq 2500	https://sra-download.ncbi.nlm.nih.gov/traces/era18/ERR/ERR1824/ERR1824434	ftp://ftp.sra.ebi.ac.uk/vol1/fastq/ERR182/004/ERR1824434/ERR1824434_1.fastq.gz	ftp://ftp.sra.ebi.ac.uk/vol1/fastq/ERR182/004/ERR1824434/ERR1824434_2.fastq.gz	project: FAANG || Material: specimen from organism || organism part: occipital cortex || specimen collection protocol: http://ftp.faang.ebi.ac.uk/ftp/protocols/samples/ROSLIN_SOP_Harvest_of_Large_Animal_Tissues_20160516.pdf || specimen collection date: 2013-10-29 || animal age at collection: 5 || developmental stage: juvenile stage || health status at collection: normal || fasted status: fed	occipital cortex	Duroc	juvenile stage	unknown
40	ERS1793683	Sus scrofa	PRJEB19386	ERR1824437	ERX1886711	RNA-Seq	Inverse rRNA	TRANSCRIPTOMIC	PAIRED	10.31	300	ILLUMINA	Illumina HiSeq 2500	https://sra-download.ncbi.nlm.nih.gov/traces/era18/ERR/ERR1824/ERR1824437	ftp://ftp.sra.ebi.ac.uk/vol1/fastq/ERR182/007/ERR1824437/ERR1824437_1.fastq.gz	ftp://ftp.sra.ebi.ac.uk/vol1/fastq/ERR182/007/ERR1824437/ERR1824437_2.fastq.gz	project: FAANG || Material: specimen from organism || organism part: medulla oblongata || specimen collection protocol: http://ftp.faang.ebi.ac.uk/ftp/protocols/samples/ROSLIN_SOP_Harvest_of_Large_Animal_Tissues_20160516.pdf || specimen collection date: 2013-10-29 || animal age at collection: 5 || developmental stage: juvenile stage || health status at collection: normal || fasted status: fed	medulla oblongata	Duroc	juvenile stage	unknown
40	ERS1793683	Sus scrofa	PRJEB19386	ERR1824438	ERX1886711	RNA-Seq	Inverse rRNA	TRANSCRIPTOMIC	PAIRED	10.54	300	ILLUMINA	Illumina HiSeq 2500	https://sra-download.ncbi.nlm.nih.gov/traces/era18/ERR/ERR1824/ERR1824438	ftp://ftp.sra.ebi.ac.uk/vol1/fastq/ERR182/008/ERR1824438/ERR1824438_1.fastq.gz	ftp://ftp.sra.ebi.ac.uk/vol1/fastq/ERR182/008/ERR1824438/ERR1824438_2.fastq.gz	project: FAANG || Material: specimen from organism || organism part: medulla oblongata || specimen collection protocol: http://ftp.faang.ebi.ac.uk/ftp/protocols/samples/ROSLIN_SOP_Harvest_of_Large_Animal_Tissues_20160516.pdf || specimen collection date: 2013-10-29 || animal age at collection: 5 || developmental stage: juvenile stage || health status at collection: normal || fasted status: fed	medulla oblongata	Duroc	juvenile stage	unknown
41	ERS1793684	Sus scrofa	PRJEB19386	ERR1824439	ERX1886712	RNA-Seq	Inverse rRNA	TRANSCRIPTOMIC	PAIRED	11.98	300	ILLUMINA	Illumina HiSeq 2500	https://sra-download.ncbi.nlm.nih.gov/traces/era18/ERR/ERR1824/ERR1824439	ftp://ftp.sra.ebi.ac.uk/vol1/fastq/ERR182/009/ERR1824439/ERR1824439_1.fastq.gz	ftp://ftp.sra.ebi.ac.uk/vol1/fastq/ERR182/009/ERR1824439/ERR1824439_2.fastq.gz	project: FAANG || Material: specimen from organism || organism part: pons || specimen collection protocol: http://ftp.faang.ebi.ac.uk/ftp/protocols/samples/ROSLIN_SOP_Harvest_of_Large_Animal_Tissues_20160516.pdf || specimen collection date: 2013-10-29 || animal age at collection: 5 || developmental stage: juvenile stage || health status at collection: normal || fasted status: fed	pons	Duroc	juvenile stage	unknown
41	ERS1793684	Sus scrofa	PRJEB19386	ERR1824440	ERX1886712	RNA-Seq	Inverse rRNA	TRANSCRIPTOMIC	PAIRED	12.24	300	ILLUMINA	Illumina HiSeq 2500	https://sra-download.ncbi.nlm.nih.gov/traces/era18/ERR/ERR1824/ERR1824440	ftp://ftp.sra.ebi.ac.uk/vol1/fastq/ERR182/000/ERR1824440/ERR1824440_1.fastq.gz	ftp://ftp.sra.ebi.ac.uk/vol1/fastq/ERR182/000/ERR1824440/ERR1824440_2.fastq.gz	project: FAANG || Material: specimen from organism || organism part: pons || specimen collection protocol: http://ftp.faang.ebi.ac.uk/ftp/protocols/samples/ROSLIN_SOP_Harvest_of_Large_Animal_Tissues_20160516.pdf || specimen collection date: 2013-10-29 || animal age at collection: 5 || developmental stage: juvenile stage || health status at collection: normal || fasted status: fed	pons	Duroc	juvenile stage	unknown
42	ERS1793685	Sus scrofa	PRJEB19386	ERR1824441	ERX1886713	RNA-Seq	Inverse rRNA	TRANSCRIPTOMIC	PAIRED	17.77	300	ILLUMINA	Illumina HiSeq 2500	https://sra-download.ncbi.nlm.nih.gov/traces/era18/ERR/ERR1824/ERR1824441	ftp://ftp.sra.ebi.ac.uk/vol1/fastq/ERR182/001/ERR1824441/ERR1824441_1.fastq.gz	ftp://ftp.sra.ebi.ac.uk/vol1/fastq/ERR182/001/ERR1824441/ERR1824441_2.fastq.gz	project: FAANG || Material: specimen from organism || organism part: amygdala || specimen collection protocol: http://ftp.faang.ebi.ac.uk/ftp/protocols/samples/ROSLIN_SOP_Harvest_of_Large_Animal_Tissues_20160516.pdf || specimen collection date: 2013-10-29 || animal age at collection: 5 || developmental stage: juvenile stage || health status at collection: normal || fasted status: fed	amygdala	Duroc	juvenile stage	unknown
42	ERS1793685	Sus scrofa	PRJEB19386	ERR1824442	ERX1886713	RNA-Seq	Inverse rRNA	TRANSCRIPTOMIC	PAIRED	18.12	300	ILLUMINA	Illumina HiSeq 2500	https://sra-download.ncbi.nlm.nih.gov/traces/era18/ERR/ERR1824/ERR1824442	ftp://ftp.sra.ebi.ac.uk/vol1/fastq/ERR182/002/ERR1824442/ERR1824442_1.fastq.gz	ftp://ftp.sra.ebi.ac.uk/vol1/fastq/ERR182/002/ERR1824442/ERR1824442_2.fastq.gz	project: FAANG || Material: specimen from organism || organism part: amygdala || specimen collection protocol: http://ftp.faang.ebi.ac.uk/ftp/protocols/samples/ROSLIN_SOP_Harvest_of_Large_Animal_Tissues_20160516.pdf || specimen collection date: 2013-10-29 || animal age at collection: 5 || developmental stage: juvenile stage || health status at collection: normal || fasted status: fed	amygdala	Duroc	juvenile stage	unknown
43	ERS1793686	Sus scrofa	PRJEB19386	ERR1824443	ERX1886714	RNA-Seq	Inverse rRNA	TRANSCRIPTOMIC	PAIRED	18.29	300	ILLUMINA	Illumina HiSeq 2500	https://sra-download.ncbi.nlm.nih.gov/traces/era18/ERR/ERR1824/ERR1824443	ftp://ftp.sra.ebi.ac.uk/vol1/fastq/ERR182/003/ERR1824443/ERR1824443_1.fastq.gz	ftp://ftp.sra.ebi.ac.uk/vol1/fastq/ERR182/003/ERR1824443/ERR1824443_2.fastq.gz	project: FAANG || Material: specimen from organism || organism part: cerebellum || specimen collection protocol: http://ftp.faang.ebi.ac.uk/ftp/protocols/samples/ROSLIN_SOP_Harvest_of_Large_Animal_Tissues_20160516.pdf || specimen collection date: 2013-10-29 || animal age at collection: 5 || developmental stage: juvenile stage || health status at collection: normal || fasted status: fed	cerebellum	Duroc	juvenile stage	unknown
43	ERS1793686	Sus scrofa	PRJEB19386	ERR1824444	ERX1886714	RNA-Seq	Inverse rRNA	TRANSCRIPTOMIC	PAIRED	18.71	300	ILLUMINA	Illumina HiSeq 2500	https://sra-download.ncbi.nlm.nih.gov/traces/era18/ERR/ERR1824/ERR1824444	ftp://ftp.sra.ebi.ac.uk/vol1/fastq/ERR182/004/ERR1824444/ERR1824444_1.fastq.gz	ftp://ftp.sra.ebi.ac.uk/vol1/fastq/ERR182/004/ERR1824444/ERR1824444_2.fastq.gz	project: FAANG || Material: specimen from organism || organism part: cerebellum || specimen collection protocol: http://ftp.faang.ebi.ac.uk/ftp/protocols/samples/ROSLIN_SOP_Harvest_of_Large_Animal_Tissues_20160516.pdf || specimen collection date: 2013-10-29 || animal age at collection: 5 || developmental stage: juvenile stage || health status at collection: normal || fasted status: fed	cerebellum	Duroc	juvenile stage	unknown
44	ERS1793687	Sus scrofa	PRJEB19386	ERR1824445	ERX1886715	RNA-Seq	Inverse rRNA	TRANSCRIPTOMIC	PAIRED	12.07	300	ILLUMINA	Illumina HiSeq 2500	https://sra-download.ncbi.nlm.nih.gov/traces/era18/ERR/ERR1824/ERR1824445	ftp://ftp.sra.ebi.ac.uk/vol1/fastq/ERR182/005/ERR1824445/ERR1824445_1.fastq.gz	ftp://ftp.sra.ebi.ac.uk/vol1/fastq/ERR182/005/ERR1824445/ERR1824445_2.fastq.gz	project: FAANG || Material: specimen from organism || organism part: corpus callosum || specimen collection protocol: http://ftp.faang.ebi.ac.uk/ftp/protocols/samples/ROSLIN_SOP_Harvest_of_Large_Animal_Tissues_20160516.pdf || specimen collection date: 2013-10-29 || animal age at collection: 5 || developmental stage: juvenile stage || health status at collection: normal || fasted status: fed	corpus callosum	Duroc	juvenile stage	unknown
44	ERS1793687	Sus scrofa	PRJEB19386	ERR1824446	ERX1886715	RNA-Seq	Inverse rRNA	TRANSCRIPTOMIC	PAIRED	11.78	300	ILLUMINA	Illumina HiSeq 2500	https://sra-download.ncbi.nlm.nih.gov/traces/era18/ERR/ERR1824/ERR1824446	ftp://ftp.sra.ebi.ac.uk/vol1/fastq/ERR182/006/ERR1824446/ERR1824446_1.fastq.gz	ftp://ftp.sra.ebi.ac.uk/vol1/fastq/ERR182/006/ERR1824446/ERR1824446_2.fastq.gz	project: FAANG || Material: specimen from organism || organism part: corpus callosum || specimen collection protocol: http://ftp.faang.ebi.ac.uk/ftp/protocols/samples/ROSLIN_SOP_Harvest_of_Large_Animal_Tissues_20160516.pdf || specimen collection date: 2013-10-29 || animal age at collection: 5 || developmental stage: juvenile stage || health status at collection: normal || fasted status: fed	corpus callosum	Duroc	juvenile stage	unknown
45	ERS1793688	Sus scrofa	PRJEB19386	ERR1824447	ERX1886716	RNA-Seq	Inverse rRNA	TRANSCRIPTOMIC	PAIRED	18.78	300	ILLUMINA	Illumina HiSeq 2500	https://sra-download.ncbi.nlm.nih.gov/traces/era18/ERR/ERR1824/ERR1824447	ftp://ftp.sra.ebi.ac.uk/vol1/fastq/ERR182/007/ERR1824447/ERR1824447_1.fastq.gz	ftp://ftp.sra.ebi.ac.uk/vol1/fastq/ERR182/007/ERR1824447/ERR1824447_2.fastq.gz	project: FAANG || Material: specimen from organism || organism part: dorsal plus ventral thalamus || specimen collection protocol: http://ftp.faang.ebi.ac.uk/ftp/protocols/samples/ROSLIN_SOP_Harvest_of_Large_Animal_Tissues_20160516.pdf || specimen collection date: 2013-10-29 || animal age at collection: 5 || developmental stage: juvenile stage || health status at collection: normal || fasted stat…	dorsal plus ventral thalamus	Duroc	juvenile stage	unknown
45	ERS1793688	Sus scrofa	PRJEB19386	ERR1824448	ERX1886716	RNA-Seq	Inverse rRNA	TRANSCRIPTOMIC	PAIRED	15.03	300	ILLUMINA	Illumina HiSeq 2500	https://sra-download.ncbi.nlm.nih.gov/traces/era18/ERR/ERR1824/ERR1824448	ftp://ftp.sra.ebi.ac.uk/vol1/fastq/ERR182/008/ERR1824448/ERR1824448_1.fastq.gz	ftp://ftp.sra.ebi.ac.uk/vol1/fastq/ERR182/008/ERR1824448/ERR1824448_2.fastq.gz	project: FAANG || Material: specimen from organism || organism part: dorsal plus ventral thalamus || specimen collection protocol: http://ftp.faang.ebi.ac.uk/ftp/protocols/samples/ROSLIN_SOP_Harvest_of_Large_Animal_Tissues_20160516.pdf || specimen collection date: 2013-10-29 || animal age at collection: 5 || developmental stage: juvenile stage || health status at collection: normal || fasted stat…	dorsal plus ventral thalamus	Duroc	juvenile stage	unknown
46	ERS1793689	Sus scrofa	PRJEB19386	ERR1824450	ERX1886717	RNA-Seq	Inverse rRNA	TRANSCRIPTOMIC	PAIRED	12.32	300	ILLUMINA	Illumina HiSeq 2500	https://sra-download.ncbi.nlm.nih.gov/traces/era18/ERR/ERR1824/ERR1824450	ftp://ftp.sra.ebi.ac.uk/vol1/fastq/ERR182/000/ERR1824450/ERR1824450_1.fastq.gz	ftp://ftp.sra.ebi.ac.uk/vol1/fastq/ERR182/000/ERR1824450/ERR1824450_2.fastq.gz	project: FAANG || Material: specimen from organism || organism part: frontal cortex || specimen collection protocol: http://ftp.faang.ebi.ac.uk/ftp/protocols/samples/ROSLIN_SOP_Harvest_of_Large_Animal_Tissues_20160516.pdf || specimen collection date: 2013-10-30 || animal age at collection: 3 || developmental stage: juvenile stage || health status at collection: normal || fasted status: fed	frontal cortex	Duroc	juvenile stage	unknown
47	ERS1793691	Sus scrofa	PRJEB19386	ERR1824453	ERX1886719	RNA-Seq	Inverse rRNA	TRANSCRIPTOMIC	PAIRED	15.14	300	ILLUMINA	Illumina HiSeq 2500	https://sra-download.ncbi.nlm.nih.gov/traces/era18/ERR/ERR1824/ERR1824453	ftp://ftp.sra.ebi.ac.uk/vol1/fastq/ERR182/003/ERR1824453/ERR1824453_1.fastq.gz	ftp://ftp.sra.ebi.ac.uk/vol1/fastq/ERR182/003/ERR1824453/ERR1824453_2.fastq.gz	project: FAANG || Material: specimen from organism || organism part: brainstem || specimen collection protocol: http://ftp.faang.ebi.ac.uk/ftp/protocols/samples/ROSLIN_SOP_Harvest_of_Large_Animal_Tissues_20160516.pdf || specimen collection date: 2013-10-30 || animal age at collection: 3 || developmental stage: juvenile stage || health status at collection: normal || fasted status: fed	brainstem	Duroc	juvenile stage	unknown
47	ERS1793691	Sus scrofa	PRJEB19386	ERR1824454	ERX1886719	RNA-Seq	Inverse rRNA	TRANSCRIPTOMIC	PAIRED	12.27	300	ILLUMINA	Illumina HiSeq 2500	https://sra-download.ncbi.nlm.nih.gov/traces/era18/ERR/ERR1824/ERR1824454	ftp://ftp.sra.ebi.ac.uk/vol1/fastq/ERR182/004/ERR1824454/ERR1824454_1.fastq.gz	ftp://ftp.sra.ebi.ac.uk/vol1/fastq/ERR182/004/ERR1824454/ERR1824454_2.fastq.gz	project: FAANG || Material: specimen from organism || organism part: brainstem || specimen collection protocol: http://ftp.faang.ebi.ac.uk/ftp/protocols/samples/ROSLIN_SOP_Harvest_of_Large_Animal_Tissues_20160516.pdf || specimen collection date: 2013-10-30 || animal age at collection: 3 || developmental stage: juvenile stage || health status at collection: normal || fasted status: fed	brainstem	Duroc	juvenile stage	unknown
48	ERS1793692	Sus scrofa	PRJEB19386	ERR1824455	ERX1886720	RNA-Seq	Inverse rRNA	TRANSCRIPTOMIC	PAIRED	17.96	300	ILLUMINA	Illumina HiSeq 2500	https://sra-download.ncbi.nlm.nih.gov/traces/era18/ERR/ERR1824/ERR1824455	ftp://ftp.sra.ebi.ac.uk/vol1/fastq/ERR182/005/ERR1824455/ERR1824455_1.fastq.gz	ftp://ftp.sra.ebi.ac.uk/vol1/fastq/ERR182/005/ERR1824455/ERR1824455_2.fastq.gz	project: FAANG || Material: specimen from organism || organism part: medulla oblongata || specimen collection protocol: http://ftp.faang.ebi.ac.uk/ftp/protocols/samples/ROSLIN_SOP_Harvest_of_Large_Animal_Tissues_20160516.pdf || specimen collection date: 2013-10-30 || animal age at collection: 3 || developmental stage: juvenile stage || health status at collection: normal || fasted status: fed	medulla oblongata	Duroc	juvenile stage	unknown
48	ERS1793692	Sus scrofa	PRJEB19386	ERR1824456	ERX1886720	RNA-Seq	Inverse rRNA	TRANSCRIPTOMIC	PAIRED	14.14	300	ILLUMINA	Illumina HiSeq 2500	https://sra-download.ncbi.nlm.nih.gov/traces/era18/ERR/ERR1824/ERR1824456	ftp://ftp.sra.ebi.ac.uk/vol1/fastq/ERR182/006/ERR1824456/ERR1824456_1.fastq.gz	ftp://ftp.sra.ebi.ac.uk/vol1/fastq/ERR182/006/ERR1824456/ERR1824456_2.fastq.gz	project: FAANG || Material: specimen from organism || organism part: medulla oblongata || specimen collection protocol: http://ftp.faang.ebi.ac.uk/ftp/protocols/samples/ROSLIN_SOP_Harvest_of_Large_Animal_Tissues_20160516.pdf || specimen collection date: 2013-10-30 || animal age at collection: 3 || developmental stage: juvenile stage || health status at collection: normal || fasted status: fed	medulla oblongata	Duroc	juvenile stage	unknown
49	ERS1793694	Sus scrofa	PRJEB19386	ERR1824459	ERX1886722	RNA-Seq	Inverse rRNA	TRANSCRIPTOMIC	PAIRED	14.27	300	ILLUMINA	Illumina HiSeq 2500	https://sra-download.ncbi.nlm.nih.gov/traces/era18/ERR/ERR1824/ERR1824459	ftp://ftp.sra.ebi.ac.uk/vol1/fastq/ERR182/009/ERR1824459/ERR1824459_1.fastq.gz	ftp://ftp.sra.ebi.ac.uk/vol1/fastq/ERR182/009/ERR1824459/ERR1824459_2.fastq.gz	project: FAANG || Material: specimen from organism || organism part: cerebellum || specimen collection protocol: http://ftp.faang.ebi.ac.uk/ftp/protocols/samples/ROSLIN_SOP_Harvest_of_Large_Animal_Tissues_20160516.pdf || specimen collection date: 2013-10-30 || animal age at collection: 3 || developmental stage: juvenile stage || health status at collection: normal || fasted status: fed	cerebellum	Duroc	juvenile stage	unknown
49	ERS1793694	Sus scrofa	PRJEB19386	ERR1824460	ERX1886722	RNA-Seq	Inverse rRNA	TRANSCRIPTOMIC	PAIRED	18.29	300	ILLUMINA	Illumina HiSeq 2500	https://sra-download.ncbi.nlm.nih.gov/traces/era18/ERR/ERR1824/ERR1824460	ftp://ftp.sra.ebi.ac.uk/vol1/fastq/ERR182/000/ERR1824460/ERR1824460_1.fastq.gz	ftp://ftp.sra.ebi.ac.uk/vol1/fastq/ERR182/000/ERR1824460/ERR1824460_2.fastq.gz	project: FAANG || Material: specimen from organism || organism part: cerebellum || specimen collection protocol: http://ftp.faang.ebi.ac.uk/ftp/protocols/samples/ROSLIN_SOP_Harvest_of_Large_Animal_Tissues_20160516.pdf || specimen collection date: 2013-10-30 || animal age at collection: 3 || developmental stage: juvenile stage || health status at collection: normal || fasted status: fed	cerebellum	Duroc	juvenile stage	unknown
50	ERS1793695	Sus scrofa	PRJEB19386	ERR1824462	ERX1886723	RNA-Seq	Inverse rRNA	TRANSCRIPTOMIC	PAIRED	10.34	300	ILLUMINA	Illumina HiSeq 2500	https://sra-download.ncbi.nlm.nih.gov/traces/era18/ERR/ERR1824/ERR1824462	ftp://ftp.sra.ebi.ac.uk/vol1/fastq/ERR182/002/ERR1824462/ERR1824462_1.fastq.gz	ftp://ftp.sra.ebi.ac.uk/vol1/fastq/ERR182/002/ERR1824462/ERR1824462_2.fastq.gz	project: FAANG || Material: specimen from organism || organism part: corpus callosum || specimen collection protocol: http://ftp.faang.ebi.ac.uk/ftp/protocols/samples/ROSLIN_SOP_Harvest_of_Large_Animal_Tissues_20160516.pdf || specimen collection date: 2013-10-30 || animal age at collection: 3 || developmental stage: juvenile stage || health status at collection: normal || fasted status: fed	corpus callosum	Duroc	juvenile stage	unknown
51	ERS1793696	Sus scrofa	PRJEB19386	ERR1824464	ERX1886724	RNA-Seq	Inverse rRNA	TRANSCRIPTOMIC	PAIRED	10.61	300	ILLUMINA	Illumina HiSeq 2500	https://sra-download.ncbi.nlm.nih.gov/traces/era18/ERR/ERR1824/ERR1824464	ftp://ftp.sra.ebi.ac.uk/vol1/fastq/ERR182/004/ERR1824464/ERR1824464_1.fastq.gz	ftp://ftp.sra.ebi.ac.uk/vol1/fastq/ERR182/004/ERR1824464/ERR1824464_2.fastq.gz	project: FAANG || Material: specimen from organism || organism part: hippocampal formation || specimen collection protocol: http://ftp.faang.ebi.ac.uk/ftp/protocols/samples/ROSLIN_SOP_Harvest_of_Large_Animal_Tissues_20160516.pdf || specimen collection date: 2013-10-30 || animal age at collection: 3 || developmental stage: juvenile stage || health status at collection: normal || fasted status: fed	hippocampal formation	Duroc	juvenile stage	unknown
51	ERS1793696	Sus scrofa	PRJEB19386	ERR1824563	ERX1886724	RNA-Seq	Inverse rRNA	TRANSCRIPTOMIC	PAIRED	12.36	300	ILLUMINA	Illumina HiSeq 2500	https://sra-download.ncbi.nlm.nih.gov/traces/era18/ERR/ERR1824/ERR1824563	ftp://ftp.sra.ebi.ac.uk/vol1/fastq/ERR182/003/ERR1824563/ERR1824563_1.fastq.gz	ftp://ftp.sra.ebi.ac.uk/vol1/fastq/ERR182/003/ERR1824563/ERR1824563_2.fastq.gz	project: FAANG || Material: specimen from organism || organism part: hippocampal formation || specimen collection protocol: http://ftp.faang.ebi.ac.uk/ftp/protocols/samples/ROSLIN_SOP_Harvest_of_Large_Animal_Tissues_20160516.pdf || specimen collection date: 2013-10-30 || animal age at collection: 3 || developmental stage: juvenile stage || health status at collection: normal || fasted status: fed	hippocampal formation	Duroc	juvenile stage	unknown
51	ERS1793696	Sus scrofa	PRJEB19386	ERR1824564	ERX1886724	RNA-Seq	Inverse rRNA	TRANSCRIPTOMIC	PAIRED	12.27	300	ILLUMINA	Illumina HiSeq 2500	https://sra-download.ncbi.nlm.nih.gov/traces/era18/ERR/ERR1824/ERR1824564	ftp://ftp.sra.ebi.ac.uk/vol1/fastq/ERR182/004/ERR1824564/ERR1824564_1.fastq.gz	ftp://ftp.sra.ebi.ac.uk/vol1/fastq/ERR182/004/ERR1824564/ERR1824564_2.fastq.gz	project: FAANG || Material: specimen from organism || organism part: hippocampal formation || specimen collection protocol: http://ftp.faang.ebi.ac.uk/ftp/protocols/samples/ROSLIN_SOP_Harvest_of_Large_Animal_Tissues_20160516.pdf || specimen collection date: 2013-10-30 || animal age at collection: 3 || developmental stage: juvenile stage || health status at collection: normal || fasted status: fed	hippocampal formation	Duroc	juvenile stage	unknown
52	ERS2227136	Sus scrofa	PRJEB23119	ERR2178429	ERX2234764	RNA-Seq	Inverse rRNA	TRANSCRIPTOMIC	PAIRED	18.63	250	ILLUMINA	Illumina HiSeq 2500	https://sra-download.ncbi.nlm.nih.gov/traces/era1/ERR/ERR2178/ERR2178429	ftp://ftp.sra.ebi.ac.uk/vol1/fastq/ERR217/009/ERR2178429/ERR2178429_1.fastq.gz	ftp://ftp.sra.ebi.ac.uk/vol1/fastq/ERR217/009/ERR2178429/ERR2178429_2.fastq.gz		BMDMs + 0hr LPS	Duroc	unknown	unknown
52	ERS2227136	Sus scrofa	PRJEB23119	ERR2178430	ERX2234764	RNA-Seq	Inverse rRNA	TRANSCRIPTOMIC	PAIRED	18.49	250	ILLUMINA	Illumina HiSeq 2500	https://sra-download.ncbi.nlm.nih.gov/traces/era10/ERR/ERR2178/ERR2178430	ftp://ftp.sra.ebi.ac.uk/vol1/fastq/ERR217/000/ERR2178430/ERR2178430_1.fastq.gz	ftp://ftp.sra.ebi.ac.uk/vol1/fastq/ERR217/000/ERR2178430/ERR2178430_2.fastq.gz		BMDMs + 0hr LPS	Duroc	unknown	unknown
52	ERS2227136	Sus scrofa	PRJEB23119	ERR2178431	ERX2234764	RNA-Seq	Inverse rRNA	TRANSCRIPTOMIC	PAIRED	18.41	250	ILLUMINA	Illumina HiSeq 2500	https://sra-download.ncbi.nlm.nih.gov/traces/era10/ERR/ERR2178/ERR2178431	ftp://ftp.sra.ebi.ac.uk/vol1/fastq/ERR217/001/ERR2178431/ERR2178431_1.fastq.gz	ftp://ftp.sra.ebi.ac.uk/vol1/fastq/ERR217/001/ERR2178431/ERR2178431_2.fastq.gz		BMDMs + 0hr LPS	Duroc	unknown	unknown
52	ERS2227136	Sus scrofa	PRJEB23119	ERR2178432	ERX2234764	RNA-Seq	Inverse rRNA	TRANSCRIPTOMIC	PAIRED	16.51	250	ILLUMINA	Illumina HiSeq 2500	https://sra-download.ncbi.nlm.nih.gov/traces/era1/ERR/ERR2178/ERR2178432	ftp://ftp.sra.ebi.ac.uk/vol1/fastq/ERR217/002/ERR2178432/ERR2178432_1.fastq.gz	ftp://ftp.sra.ebi.ac.uk/vol1/fastq/ERR217/002/ERR2178432/ERR2178432_2.fastq.gz		BMDMs + 0hr LPS	Duroc	unknown	unknown
52	ERS2227136	Sus scrofa	PRJEB23119	ERR2178433	ERX2234764	RNA-Seq	Inverse rRNA	TRANSCRIPTOMIC	PAIRED	18.4	250	ILLUMINA	Illumina HiSeq 2500	https://sra-download.ncbi.nlm.nih.gov/traces/era10/ERR/ERR2178/ERR2178433	ftp://ftp.sra.ebi.ac.uk/vol1/fastq/ERR217/003/ERR2178433/ERR2178433_1.fastq.gz	ftp://ftp.sra.ebi.ac.uk/vol1/fastq/ERR217/003/ERR2178433/ERR2178433_2.fastq.gz		BMDMs + 0hr LPS	Duroc	unknown	unknown
52	ERS2227136	Sus scrofa	PRJEB23119	ERR2178434	ERX2234764	RNA-Seq	Inverse rRNA	TRANSCRIPTOMIC	PAIRED	17.49	250	ILLUMINA	Illumina HiSeq 2500	https://sra-download.ncbi.nlm.nih.gov/traces/era10/ERR/ERR2178/ERR2178434	ftp://ftp.sra.ebi.ac.uk/vol1/fastq/ERR217/004/ERR2178434/ERR2178434_1.fastq.gz	ftp://ftp.sra.ebi.ac.uk/vol1/fastq/ERR217/004/ERR2178434/ERR2178434_2.fastq.gz		BMDMs + 0hr LPS	Duroc	unknown	unknown
52	ERS2227136	Sus scrofa	PRJEB23119	ERR2178435	ERX2234764	RNA-Seq	Inverse rRNA	TRANSCRIPTOMIC	PAIRED	13.58	250	ILLUMINA	Illumina HiSeq 2500	https://sra-download.ncbi.nlm.nih.gov/traces/era10/ERR/ERR2178/ERR2178435	ftp://ftp.sra.ebi.ac.uk/vol1/fastq/ERR217/005/ERR2178435/ERR2178435_1.fastq.gz	ftp://ftp.sra.ebi.ac.uk/vol1/fastq/ERR217/005/ERR2178435/ERR2178435_2.fastq.gz		BMDMs + 0hr LPS	Duroc	unknown	unknown
53	ERS2227137	Sus scrofa	PRJEB23119	ERR2178450	ERX2234767	RNA-Seq	Inverse rRNA	TRANSCRIPTOMIC	PAIRED	18.65	250	ILLUMINA	Illumina HiSeq 2500		ftp://ftp.sra.ebi.ac.uk/vol1/fastq/ERR217/000/ERR2178450/ERR2178450_1.fastq.gz	ftp://ftp.sra.ebi.ac.uk/vol1/fastq/ERR217/000/ERR2178450/ERR2178450_2.fastq.gz		BMDMs + 7hr LPS	Duroc	unknown	unknown
53	ERS2227137	Sus scrofa	PRJEB23119	ERR2178451	ERX2234767	RNA-Seq	Inverse rRNA	TRANSCRIPTOMIC	PAIRED	18.56	250	ILLUMINA	Illumina HiSeq 2500		ftp://ftp.sra.ebi.ac.uk/vol1/fastq/ERR217/001/ERR2178451/ERR2178451_1.fastq.gz	ftp://ftp.sra.ebi.ac.uk/vol1/fastq/ERR217/001/ERR2178451/ERR2178451_2.fastq.gz		BMDMs + 7hr LPS	Duroc	unknown	unknown
53	ERS2227137	Sus scrofa	PRJEB23119	ERR2178452	ERX2234767	RNA-Seq	Inverse rRNA	TRANSCRIPTOMIC	PAIRED	18.79	250	ILLUMINA	Illumina HiSeq 2500		ftp://ftp.sra.ebi.ac.uk/vol1/fastq/ERR217/002/ERR2178452/ERR2178452_1.fastq.gz	ftp://ftp.sra.ebi.ac.uk/vol1/fastq/ERR217/002/ERR2178452/ERR2178452_2.fastq.gz		BMDMs + 7hr LPS	Duroc	unknown	unknown
53	ERS2227137	Sus scrofa	PRJEB23119	ERR2178453	ERX2234767	RNA-Seq	Inverse rRNA	TRANSCRIPTOMIC	PAIRED	17.64	250	ILLUMINA	Illumina HiSeq 2500		ftp://ftp.sra.ebi.ac.uk/vol1/fastq/ERR217/003/ERR2178453/ERR2178453_1.fastq.gz	ftp://ftp.sra.ebi.ac.uk/vol1/fastq/ERR217/003/ERR2178453/ERR2178453_2.fastq.gz		BMDMs + 7hr LPS	Duroc	unknown	unknown
53	ERS2227137	Sus scrofa	PRJEB23119	ERR2178454	ERX2234767	RNA-Seq	Inverse rRNA	TRANSCRIPTOMIC	PAIRED	18.57	250	ILLUMINA	Illumina HiSeq 2500		ftp://ftp.sra.ebi.ac.uk/vol1/fastq/ERR217/004/ERR2178454/ERR2178454_1.fastq.gz	ftp://ftp.sra.ebi.ac.uk/vol1/fastq/ERR217/004/ERR2178454/ERR2178454_2.fastq.gz		BMDMs + 7hr LPS	Duroc	unknown	unknown
53	ERS2227137	Sus scrofa	PRJEB23119	ERR2178455	ERX2234767	RNA-Seq	Inverse rRNA	TRANSCRIPTOMIC	PAIRED	13.61	250	ILLUMINA	Illumina HiSeq 2500		ftp://ftp.sra.ebi.ac.uk/vol1/fastq/ERR217/005/ERR2178455/ERR2178455_1.fastq.gz	ftp://ftp.sra.ebi.ac.uk/vol1/fastq/ERR217/005/ERR2178455/ERR2178455_2.fastq.gz		BMDMs + 7hr LPS	Duroc	unknown	unknown
53	ERS2227137	Sus scrofa	PRJEB23119	ERR2178456	ERX2234767	RNA-Seq	Inverse rRNA	TRANSCRIPTOMIC	PAIRED	16.64	250	ILLUMINA	Illumina HiSeq 2500		ftp://ftp.sra.ebi.ac.uk/vol1/fastq/ERR217/006/ERR2178456/ERR2178456_1.fastq.gz	ftp://ftp.sra.ebi.ac.uk/vol1/fastq/ERR217/006/ERR2178456/ERR2178456_2.fastq.gz		BMDMs + 7hr LPS	Duroc	unknown	unknown
54	ERS2227138	Sus scrofa	PRJEB23119	ERR2178415	ERX2234762	RNA-Seq	Inverse rRNA	TRANSCRIPTOMIC	PAIRED	20.78	250	ILLUMINA	Illumina HiSeq 2500	https://sra-download.ncbi.nlm.nih.gov/traces/era10/ERR/ERR2178/ERR2178415	ftp://ftp.sra.ebi.ac.uk/vol1/fastq/ERR217/005/ERR2178415/ERR2178415_1.fastq.gz	ftp://ftp.sra.ebi.ac.uk/vol1/fastq/ERR217/005/ERR2178415/ERR2178415_2.fastq.gz		BMDMs + 0hr LPS	Duroc	unknown	unknown
54	ERS2227138	Sus scrofa	PRJEB23119	ERR2178416	ERX2234762	RNA-Seq	Inverse rRNA	TRANSCRIPTOMIC	PAIRED	19.48	250	ILLUMINA	Illumina HiSeq 2500	https://sra-download.ncbi.nlm.nih.gov/traces/era1/ERR/ERR2178/ERR2178416	ftp://ftp.sra.ebi.ac.uk/vol1/fastq/ERR217/006/ERR2178416/ERR2178416_1.fastq.gz	ftp://ftp.sra.ebi.ac.uk/vol1/fastq/ERR217/006/ERR2178416/ERR2178416_2.fastq.gz		BMDMs + 0hr LPS	Duroc	unknown	unknown
54	ERS2227138	Sus scrofa	PRJEB23119	ERR2178417	ERX2234762	RNA-Seq	Inverse rRNA	TRANSCRIPTOMIC	PAIRED	14.92	250	ILLUMINA	Illumina HiSeq 2500	https://sra-download.ncbi.nlm.nih.gov/traces/era1/ERR/ERR2178/ERR2178417	ftp://ftp.sra.ebi.ac.uk/vol1/fastq/ERR217/007/ERR2178417/ERR2178417_1.fastq.gz	ftp://ftp.sra.ebi.ac.uk/vol1/fastq/ERR217/007/ERR2178417/ERR2178417_2.fastq.gz		BMDMs + 0hr LPS	Duroc	unknown	unknown
54	ERS2227138	Sus scrofa	PRJEB23119	ERR2178418	ERX2234762	RNA-Seq	Inverse rRNA	TRANSCRIPTOMIC	PAIRED	18.33	250	ILLUMINA	Illumina HiSeq 2500	https://sra-download.ncbi.nlm.nih.gov/traces/era1/ERR/ERR2178/ERR2178418	ftp://ftp.sra.ebi.ac.uk/vol1/fastq/ERR217/008/ERR2178418/ERR2178418_1.fastq.gz	ftp://ftp.sra.ebi.ac.uk/vol1/fastq/ERR217/008/ERR2178418/ERR2178418_2.fastq.gz		BMDMs + 0hr LPS	Duroc	unknown	unknown
54	ERS2227138	Sus scrofa	PRJEB23119	ERR2178419	ERX2234762	RNA-Seq	Inverse rRNA	TRANSCRIPTOMIC	PAIRED	20.54	250	ILLUMINA	Illumina HiSeq 2500	https://sra-download.ncbi.nlm.nih.gov/traces/era1/ERR/ERR2178/ERR2178419	ftp://ftp.sra.ebi.ac.uk/vol1/fastq/ERR217/009/ERR2178419/ERR2178419_1.fastq.gz	ftp://ftp.sra.ebi.ac.uk/vol1/fastq/ERR217/009/ERR2178419/ERR2178419_2.fastq.gz		BMDMs + 0hr LPS	Duroc	unknown	unknown
54	ERS2227138	Sus scrofa	PRJEB23119	ERR2178420	ERX2234762	RNA-Seq	Inverse rRNA	TRANSCRIPTOMIC	PAIRED	20.52	250	ILLUMINA	Illumina HiSeq 2500		ftp://ftp.sra.ebi.ac.uk/vol1/fastq/ERR217/000/ERR2178420/ERR2178420_1.fastq.gz	ftp://ftp.sra.ebi.ac.uk/vol1/fastq/ERR217/000/ERR2178420/ERR2178420_2.fastq.gz		BMDMs + 0hr LPS	Duroc	unknown	unknown
54	ERS2227138	Sus scrofa	PRJEB23119	ERR2178421	ERX2234762	RNA-Seq	Inverse rRNA	TRANSCRIPTOMIC	PAIRED	20.6	250	ILLUMINA	Illumina HiSeq 2500		ftp://ftp.sra.ebi.ac.uk/vol1/fastq/ERR217/001/ERR2178421/ERR2178421_1.fastq.gz	ftp://ftp.sra.ebi.ac.uk/vol1/fastq/ERR217/001/ERR2178421/ERR2178421_2.fastq.gz		BMDMs + 0hr LPS	Duroc	unknown	unknown
55	ERS2227139	Sus scrofa	PRJEB23119	ERR2178436	ERX2234765	RNA-Seq	Inverse rRNA	TRANSCRIPTOMIC	PAIRED	16.27	250	ILLUMINA	Illumina HiSeq 2500	https://sra-download.ncbi.nlm.nih.gov/traces/era10/ERR/ERR2178/ERR2178436	ftp://ftp.sra.ebi.ac.uk/vol1/fastq/ERR217/006/ERR2178436/ERR2178436_1.fastq.gz	ftp://ftp.sra.ebi.ac.uk/vol1/fastq/ERR217/006/ERR2178436/ERR2178436_2.fastq.gz		BMDMs + 7hr LPS	Duroc	unknown	unknown
55	ERS2227139	Sus scrofa	PRJEB23119	ERR2178437	ERX2234765	RNA-Seq	Inverse rRNA	TRANSCRIPTOMIC	PAIRED	17.25	250	ILLUMINA	Illumina HiSeq 2500	https://sra-download.ncbi.nlm.nih.gov/traces/era1/ERR/ERR2178/ERR2178437	ftp://ftp.sra.ebi.ac.uk/vol1/fastq/ERR217/007/ERR2178437/ERR2178437_1.fastq.gz	ftp://ftp.sra.ebi.ac.uk/vol1/fastq/ERR217/007/ERR2178437/ERR2178437_2.fastq.gz		BMDMs + 7hr LPS	Duroc	unknown	unknown
55	ERS2227139	Sus scrofa	PRJEB23119	ERR2178438	ERX2234765	RNA-Seq	Inverse rRNA	TRANSCRIPTOMIC	PAIRED	18.19	250	ILLUMINA	Illumina HiSeq 2500	https://sra-download.ncbi.nlm.nih.gov/traces/era10/ERR/ERR2178/ERR2178438	ftp://ftp.sra.ebi.ac.uk/vol1/fastq/ERR217/008/ERR2178438/ERR2178438_1.fastq.gz	ftp://ftp.sra.ebi.ac.uk/vol1/fastq/ERR217/008/ERR2178438/ERR2178438_2.fastq.gz		BMDMs + 7hr LPS	Duroc	unknown	unknown
55	ERS2227139	Sus scrofa	PRJEB23119	ERR2178439	ERX2234765	RNA-Seq	Inverse rRNA	TRANSCRIPTOMIC	PAIRED	18.18	250	ILLUMINA	Illumina HiSeq 2500	https://sra-download.ncbi.nlm.nih.gov/traces/era10/ERR/ERR2178/ERR2178439	ftp://ftp.sra.ebi.ac.uk/vol1/fastq/ERR217/009/ERR2178439/ERR2178439_1.fastq.gz	ftp://ftp.sra.ebi.ac.uk/vol1/fastq/ERR217/009/ERR2178439/ERR2178439_2.fastq.gz		BMDMs + 7hr LPS	Duroc	unknown	unknown
55	ERS2227139	Sus scrofa	PRJEB23119	ERR2178440	ERX2234765	RNA-Seq	Inverse rRNA	TRANSCRIPTOMIC	PAIRED	18.42	250	ILLUMINA	Illumina HiSeq 2500	https://sra-download.ncbi.nlm.nih.gov/traces/era10/ERR/ERR2178/ERR2178440	ftp://ftp.sra.ebi.ac.uk/vol1/fastq/ERR217/000/ERR2178440/ERR2178440_1.fastq.gz	ftp://ftp.sra.ebi.ac.uk/vol1/fastq/ERR217/000/ERR2178440/ERR2178440_2.fastq.gz		BMDMs + 7hr LPS	Duroc	unknown	unknown
55	ERS2227139	Sus scrofa	PRJEB23119	ERR2178441	ERX2234765	RNA-Seq	Inverse rRNA	TRANSCRIPTOMIC	PAIRED	18.28	250	ILLUMINA	Illumina HiSeq 2500	https://sra-download.ncbi.nlm.nih.gov/traces/era1/ERR/ERR2178/ERR2178441	ftp://ftp.sra.ebi.ac.uk/vol1/fastq/ERR217/001/ERR2178441/ERR2178441_1.fastq.gz	ftp://ftp.sra.ebi.ac.uk/vol1/fastq/ERR217/001/ERR2178441/ERR2178441_2.fastq.gz		BMDMs + 7hr LPS	Duroc	unknown	unknown
55	ERS2227139	Sus scrofa	PRJEB23119	ERR2178442	ERX2234765	RNA-Seq	Inverse rRNA	TRANSCRIPTOMIC	PAIRED	13.26	250	ILLUMINA	Illumina HiSeq 2500	https://sra-download.ncbi.nlm.nih.gov/traces/era10/ERR/ERR2178/ERR2178442	ftp://ftp.sra.ebi.ac.uk/vol1/fastq/ERR217/002/ERR2178442/ERR2178442_1.fastq.gz	ftp://ftp.sra.ebi.ac.uk/vol1/fastq/ERR217/002/ERR2178442/ERR2178442_2.fastq.gz		BMDMs + 7hr LPS	Duroc	unknown	unknown
56	ERS2227140	Sus scrofa	PRJEB23119	ERR2178422	ERX2234763	RNA-Seq	Inverse rRNA	TRANSCRIPTOMIC	PAIRED	18.28	250	ILLUMINA	Illumina HiSeq 2500	https://sra-download.ncbi.nlm.nih.gov/traces/era1/ERR/ERR2178/ERR2178422	ftp://ftp.sra.ebi.ac.uk/vol1/fastq/ERR217/002/ERR2178422/ERR2178422_1.fastq.gz	ftp://ftp.sra.ebi.ac.uk/vol1/fastq/ERR217/002/ERR2178422/ERR2178422_2.fastq.gz		BMDMs + 7hr LPS	Duroc	unknown	unknown
56	ERS2227140	Sus scrofa	PRJEB23119	ERR2178423	ERX2234763	RNA-Seq	Inverse rRNA	TRANSCRIPTOMIC	PAIRED	18.52	250	ILLUMINA	Illumina HiSeq 2500	https://sra-download.ncbi.nlm.nih.gov/traces/era1/ERR/ERR2178/ERR2178423	ftp://ftp.sra.ebi.ac.uk/vol1/fastq/ERR217/003/ERR2178423/ERR2178423_1.fastq.gz	ftp://ftp.sra.ebi.ac.uk/vol1/fastq/ERR217/003/ERR2178423/ERR2178423_2.fastq.gz		BMDMs + 7hr LPS	Duroc	unknown	unknown
56	ERS2227140	Sus scrofa	PRJEB23119	ERR2178424	ERX2234763	RNA-Seq	Inverse rRNA	TRANSCRIPTOMIC	PAIRED	17.38	250	ILLUMINA	Illumina HiSeq 2500	https://sra-download.ncbi.nlm.nih.gov/traces/era1/ERR/ERR2178/ERR2178424	ftp://ftp.sra.ebi.ac.uk/vol1/fastq/ERR217/004/ERR2178424/ERR2178424_1.fastq.gz	ftp://ftp.sra.ebi.ac.uk/vol1/fastq/ERR217/004/ERR2178424/ERR2178424_2.fastq.gz		BMDMs + 7hr LPS	Duroc	unknown	unknown
56	ERS2227140	Sus scrofa	PRJEB23119	ERR2178425	ERX2234763	RNA-Seq	Inverse rRNA	TRANSCRIPTOMIC	PAIRED	13.42	250	ILLUMINA	Illumina HiSeq 2500	https://sra-download.ncbi.nlm.nih.gov/traces/era1/ERR/ERR2178/ERR2178425	ftp://ftp.sra.ebi.ac.uk/vol1/fastq/ERR217/005/ERR2178425/ERR2178425_1.fastq.gz	ftp://ftp.sra.ebi.ac.uk/vol1/fastq/ERR217/005/ERR2178425/ERR2178425_2.fastq.gz		BMDMs + 7hr LPS	Duroc	unknown	unknown
56	ERS2227140	Sus scrofa	PRJEB23119	ERR2178426	ERX2234763	RNA-Seq	Inverse rRNA	TRANSCRIPTOMIC	PAIRED	18.36	250	ILLUMINA	Illumina HiSeq 2500	https://sra-download.ncbi.nlm.nih.gov/traces/era1/ERR/ERR2178/ERR2178426	ftp://ftp.sra.ebi.ac.uk/vol1/fastq/ERR217/006/ERR2178426/ERR2178426_1.fastq.gz	ftp://ftp.sra.ebi.ac.uk/vol1/fastq/ERR217/006/ERR2178426/ERR2178426_2.fastq.gz		BMDMs + 7hr LPS	Duroc	unknown	unknown
56	ERS2227140	Sus scrofa	PRJEB23119	ERR2178427	ERX2234763	RNA-Seq	Inverse rRNA	TRANSCRIPTOMIC	PAIRED	18.32	250	ILLUMINA	Illumina HiSeq 2500	https://sra-download.ncbi.nlm.nih.gov/traces/era1/ERR/ERR2178/ERR2178427	ftp://ftp.sra.ebi.ac.uk/vol1/fastq/ERR217/007/ERR2178427/ERR2178427_1.fastq.gz	ftp://ftp.sra.ebi.ac.uk/vol1/fastq/ERR217/007/ERR2178427/ERR2178427_2.fastq.gz		BMDMs + 7hr LPS	Duroc	unknown	unknown
56	ERS2227140	Sus scrofa	PRJEB23119	ERR2178428	ERX2234763	RNA-Seq	Inverse rRNA	TRANSCRIPTOMIC	PAIRED	16.4	250	ILLUMINA	Illumina HiSeq 2500	https://sra-download.ncbi.nlm.nih.gov/traces/era1/ERR/ERR2178/ERR2178428	ftp://ftp.sra.ebi.ac.uk/vol1/fastq/ERR217/008/ERR2178428/ERR2178428_1.fastq.gz	ftp://ftp.sra.ebi.ac.uk/vol1/fastq/ERR217/008/ERR2178428/ERR2178428_2.fastq.gz		BMDMs + 7hr LPS	Duroc	unknown	unknown
57	ERS2227141	Sus scrofa	PRJEB23119	ERR2178443	ERX2234766	RNA-Seq	Inverse rRNA	TRANSCRIPTOMIC	PAIRED	22.22	250	ILLUMINA	Illumina HiSeq 2500		ftp://ftp.sra.ebi.ac.uk/vol1/fastq/ERR217/003/ERR2178443/ERR2178443_1.fastq.gz	ftp://ftp.sra.ebi.ac.uk/vol1/fastq/ERR217/003/ERR2178443/ERR2178443_2.fastq.gz		BMDMs + 0hr LPS	Duroc	unknown	unknown
57	ERS2227141	Sus scrofa	PRJEB23119	ERR2178444	ERX2234766	RNA-Seq	Inverse rRNA	TRANSCRIPTOMIC	PAIRED	21.1	250	ILLUMINA	Illumina HiSeq 2500		ftp://ftp.sra.ebi.ac.uk/vol1/fastq/ERR217/004/ERR2178444/ERR2178444_1.fastq.gz	ftp://ftp.sra.ebi.ac.uk/vol1/fastq/ERR217/004/ERR2178444/ERR2178444_2.fastq.gz		BMDMs + 0hr LPS	Duroc	unknown	unknown
57	ERS2227141	Sus scrofa	PRJEB23119	ERR2178445	ERX2234766	RNA-Seq	Inverse rRNA	TRANSCRIPTOMIC	PAIRED	19.88	250	ILLUMINA	Illumina HiSeq 2500	https://sra-download.ncbi.nlm.nih.gov/traces/era10/ERR/ERR2178/ERR2178445	ftp://ftp.sra.ebi.ac.uk/vol1/fastq/ERR217/005/ERR2178445/ERR2178445_1.fastq.gz	ftp://ftp.sra.ebi.ac.uk/vol1/fastq/ERR217/005/ERR2178445/ERR2178445_2.fastq.gz		BMDMs + 0hr LPS	Duroc	unknown	unknown
57	ERS2227141	Sus scrofa	PRJEB23119	ERR2178446	ERX2234766	RNA-Seq	Inverse rRNA	TRANSCRIPTOMIC	PAIRED	22.5	250	ILLUMINA	Illumina HiSeq 2500		ftp://ftp.sra.ebi.ac.uk/vol1/fastq/ERR217/006/ERR2178446/ERR2178446_1.fastq.gz	ftp://ftp.sra.ebi.ac.uk/vol1/fastq/ERR217/006/ERR2178446/ERR2178446_2.fastq.gz		BMDMs + 0hr LPS	Duroc	unknown	unknown
57	ERS2227141	Sus scrofa	PRJEB23119	ERR2178447	ERX2234766	RNA-Seq	Inverse rRNA	TRANSCRIPTOMIC	PAIRED	16.19	250	ILLUMINA	Illumina HiSeq 2500		ftp://ftp.sra.ebi.ac.uk/vol1/fastq/ERR217/007/ERR2178447/ERR2178447_1.fastq.gz	ftp://ftp.sra.ebi.ac.uk/vol1/fastq/ERR217/007/ERR2178447/ERR2178447_2.fastq.gz		BMDMs + 0hr LPS	Duroc	unknown	unknown
57	ERS2227141	Sus scrofa	PRJEB23119	ERR2178448	ERX2234766	RNA-Seq	Inverse rRNA	TRANSCRIPTOMIC	PAIRED	22.34	250	ILLUMINA	Illumina HiSeq 2500		ftp://ftp.sra.ebi.ac.uk/vol1/fastq/ERR217/008/ERR2178448/ERR2178448_1.fastq.gz	ftp://ftp.sra.ebi.ac.uk/vol1/fastq/ERR217/008/ERR2178448/ERR2178448_2.fastq.gz		BMDMs + 0hr LPS	Duroc	unknown	unknown
57	ERS2227141	Sus scrofa	PRJEB23119	ERR2178449	ERX2234766	RNA-Seq	Inverse rRNA	TRANSCRIPTOMIC	PAIRED	22.24	250	ILLUMINA	Illumina HiSeq 2500	https://sra-download.ncbi.nlm.nih.gov/traces/era13/ERR/ERR2178/ERR2178449	ftp://ftp.sra.ebi.ac.uk/vol1/fastq/ERR217/009/ERR2178449/ERR2178449_1.fastq.gz	ftp://ftp.sra.ebi.ac.uk/vol1/fastq/ERR217/009/ERR2178449/ERR2178449_2.fastq.gz		BMDMs + 0hr LPS	Duroc	unknown	unknown
58	SRS388205	Sus scrofa	PRJNA188070	SRR653843	SRX220648	RNA-Seq	cDNA	TRANSCRIPTOMIC	PAIRED	52.36	200	ILLUMINA	Illumina HiSeq 2000	https://sra-download.ncbi.nlm.nih.gov/traces/sra8/SRR/000638/SRR653843	ftp://ftp.sra.ebi.ac.uk/vol1/fastq/SRR653/SRR653843/SRR653843_1.fastq.gz	ftp://ftp.sra.ebi.ac.uk/vol1/fastq/SRR653/SRR653843/SRR653843_2.fastq.gz	source_name: TP_heart_RNA-seq || breed: Tibetan || local origin: Ganzi Tibetan autonomous prefecture, Sichuan province, China || tissue: Heart	Heart	Tibetan	unknown	unknown
59	SRS388206	Sus scrofa	PRJNA188070	SRR653844	SRX220649	RNA-Seq	cDNA	TRANSCRIPTOMIC	PAIRED	10.13	200	ILLUMINA	Illumina HiSeq 2000	https://sra-download.ncbi.nlm.nih.gov/traces/sra8/SRR/000638/SRR653844	ftp://ftp.sra.ebi.ac.uk/vol1/fastq/SRR653/SRR653844/SRR653844_1.fastq.gz	ftp://ftp.sra.ebi.ac.uk/vol1/fastq/SRR653/SRR653844/SRR653844_2.fastq.gz	source_name: TP_liver_RNA-seq || breed: Tibetan || local origin: Ganzi Tibetan autonomous prefecture, Sichuan province, China || tissue: Liver	Liver	Tibetan	unknown	unknown
60	SRS388207	Sus scrofa	PRJNA188070	SRR653845	SRX220650	RNA-Seq	cDNA	TRANSCRIPTOMIC	PAIRED	17.63	200	ILLUMINA	Illumina HiSeq 2000	https://sra-download.ncbi.nlm.nih.gov/traces/sra8/SRR/000638/SRR653845	ftp://ftp.sra.ebi.ac.uk/vol1/fastq/SRR653/SRR653845/SRR653845_1.fastq.gz	ftp://ftp.sra.ebi.ac.uk/vol1/fastq/SRR653/SRR653845/SRR653845_2.fastq.gz	source_name: TP_lung_RNA-seq || breed: Tibetan || local origin: Ganzi Tibetan autonomous prefecture, Sichuan province, China || tissue: Lung	Lung	Tibetan	unknown	unknown
61	SRS388208	Sus scrofa	PRJNA188070	SRR653846	SRX220651	RNA-Seq	cDNA	TRANSCRIPTOMIC	PAIRED	15.23	200	ILLUMINA	Illumina HiSeq 2000	https://sra-download.ncbi.nlm.nih.gov/traces/sra8/SRR/000638/SRR653846	ftp://ftp.sra.ebi.ac.uk/vol1/fastq/SRR653/SRR653846/SRR653846_1.fastq.gz	ftp://ftp.sra.ebi.ac.uk/vol1/fastq/SRR653/SRR653846/SRR653846_2.fastq.gz	source_name: TP_kidney_RNA-seq || breed: Tibetan || local origin: Ganzi Tibetan autonomous prefecture, Sichuan province, China || tissue: Kidney	Kidney	Tibetan	unknown	unknown
62	SRS401903	Sus scrofa	PRJNA193204	SRR776497	SRX250100	RNA-Seq	cDNA	TRANSCRIPTOMIC	PAIRED	20.16	202	ILLUMINA	Illumina HiSeq 2000	https://sra-download.ncbi.nlm.nih.gov/traces/sra9/SRR/000758/SRR776497	ftp://ftp.sra.ebi.ac.uk/vol1/fastq/SRR776/SRR776497/SRR776497_1.fastq.gz	ftp://ftp.sra.ebi.ac.uk/vol1/fastq/SRR776/SRR776497/SRR776497_2.fastq.gz	source_name: Berkshire_Fat || breed: Berkshire || tissue: fat	fat	Berkshire	unknown	unknown
63	SRS401904	Sus scrofa	PRJNA193204	SRR776498	SRX250101	RNA-Seq	cDNA	TRANSCRIPTOMIC	PAIRED	18.81	202	ILLUMINA	Illumina HiSeq 2000	https://sra-download.ncbi.nlm.nih.gov/traces/sra9/SRR/000758/SRR776498	ftp://ftp.sra.ebi.ac.uk/vol1/fastq/SRR776/SRR776498/SRR776498_1.fastq.gz	ftp://ftp.sra.ebi.ac.uk/vol1/fastq/SRR776/SRR776498/SRR776498_2.fastq.gz	source_name: Berkshire_Liver || breed: Berkshire || tissue: liver	liver	Berkshire	unknown	unknown
64	SRS401905	Sus scrofa	PRJNA193204	SRR776499	SRX250102	RNA-Seq	cDNA	TRANSCRIPTOMIC	PAIRED	18.66	202	ILLUMINA	Illumina HiSeq 2000	https://sra-download.ncbi.nlm.nih.gov/traces/sra9/SRR/000758/SRR776499	ftp://ftp.sra.ebi.ac.uk/vol1/fastq/SRR776/SRR776499/SRR776499_1.fastq.gz	ftp://ftp.sra.ebi.ac.uk/vol1/fastq/SRR776/SRR776499/SRR776499_2.fastq.gz	source_name: Berkshire_Muscle || breed: Berkshire || tissue: muscle	muscle	Berkshire	unknown	unknown
65	SRS401906	Sus scrofa	PRJNA193204	SRR776500	SRX250103	RNA-Seq	cDNA	TRANSCRIPTOMIC	PAIRED	20.71	202	ILLUMINA	Illumina HiSeq 2000	https://sra-download.ncbi.nlm.nih.gov/traces/sra9/SRR/000758/SRR776500	ftp://ftp.sra.ebi.ac.uk/vol1/fastq/SRR776/SRR776500/SRR776500_1.fastq.gz	ftp://ftp.sra.ebi.ac.uk/vol1/fastq/SRR776/SRR776500/SRR776500_2.fastq.gz	source_name: Korean native_Fat || breed: Korean native pig || tissue: fat	fat	Korean native pig	unknown	unknown
66	SRS401907	Sus scrofa	PRJNA193204	SRR776501	SRX250104	RNA-Seq	cDNA	TRANSCRIPTOMIC	PAIRED	22.63	202	ILLUMINA	Illumina HiSeq 2000	https://sra-download.ncbi.nlm.nih.gov/traces/sra9/SRR/000758/SRR776501	ftp://ftp.sra.ebi.ac.uk/vol1/fastq/SRR776/SRR776501/SRR776501_1.fastq.gz	ftp://ftp.sra.ebi.ac.uk/vol1/fastq/SRR776/SRR776501/SRR776501_2.fastq.gz	source_name: Korean native_Liver || breed: Korean native pig || tissue: liver	liver	Korean native pig	unknown	unknown
67	SRS401908	Sus scrofa	PRJNA193204	SRR776502	SRX250105	RNA-Seq	cDNA	TRANSCRIPTOMIC	PAIRED	17.78	202	ILLUMINA	Illumina HiSeq 2000	https://sra-download.ncbi.nlm.nih.gov/traces/sra9/SRR/000758/SRR776502	ftp://ftp.sra.ebi.ac.uk/vol1/fastq/SRR776/SRR776502/SRR776502_1.fastq.gz	ftp://ftp.sra.ebi.ac.uk/vol1/fastq/SRR776/SRR776502/SRR776502_2.fastq.gz	source_name: Korean native_Muscle || breed: Korean native pig || tissue: muscle	muscle	Korean native pig	unknown	unknown
68	SRS497443	Sus scrofa	PRJNA225941	SRR1022876	SRX372013	RNA-Seq	cDNA	TRANSCRIPTOMIC	PAIRED	22.05	152	ILLUMINA	Illumina HiSeq 2000	https://sra-download.ncbi.nlm.nih.gov/traces/sra14/SRR/000998/SRR1022876	ftp://ftp.sra.ebi.ac.uk/vol1/fastq/SRR102/006/SRR1022876/SRR1022876_1.fastq.gz	ftp://ftp.sra.ebi.ac.uk/vol1/fastq/SRR102/006/SRR1022876/SRR1022876_2.fastq.gz	source_name: hypothalamus, high growth and fatness || breed: Iberian x Landrace backcross || tissue: hypothalamus || phenotype: high growth and fatness	hypothalamus	Iberian x Landrace backcross	unknown	unknown
69	SRS497444	Sus scrofa	PRJNA225941	SRR1022878	SRX372014	RNA-Seq	cDNA	TRANSCRIPTOMIC	PAIRED	13.75	152	ILLUMINA	Illumina HiSeq 2000	https://sra-download.ncbi.nlm.nih.gov/traces/sra14/SRR/000998/SRR1022878	ftp://ftp.sra.ebi.ac.uk/vol1/fastq/SRR102/008/SRR1022878/SRR1022878_1.fastq.gz	ftp://ftp.sra.ebi.ac.uk/vol1/fastq/SRR102/008/SRR1022878/SRR1022878_2.fastq.gz	source_name: hypothalamus, high growth and fatness || breed: Iberian x Landrace backcross || tissue: hypothalamus || phenotype: high growth and fatness	hypothalamus	Iberian x Landrace backcross	unknown	unknown
69	SRS497444	Sus scrofa	PRJNA225941	SRR1022879	SRX372014	RNA-Seq	cDNA	TRANSCRIPTOMIC	PAIRED	13.69	152	ILLUMINA	Illumina HiSeq 2000	https://sra-download.ncbi.nlm.nih.gov/traces/sra14/SRR/000998/SRR1022879	ftp://ftp.sra.ebi.ac.uk/vol1/fastq/SRR102/009/SRR1022879/SRR1022879_1.fastq.gz	ftp://ftp.sra.ebi.ac.uk/vol1/fastq/SRR102/009/SRR1022879/SRR1022879_2.fastq.gz	source_name: hypothalamus, high growth and fatness || breed: Iberian x Landrace backcross || tissue: hypothalamus || phenotype: high growth and fatness	hypothalamus	Iberian x Landrace backcross	unknown	unknown
69	SRS497444	Sus scrofa	PRJNA225941	SRR1022881	SRX372014	RNA-Seq	cDNA	TRANSCRIPTOMIC	PAIRED	14.8	152	ILLUMINA	Illumina HiSeq 2000	https://sra-download.ncbi.nlm.nih.gov/traces/sra14/SRR/000998/SRR1022881	ftp://ftp.sra.ebi.ac.uk/vol1/fastq/SRR102/001/SRR1022881/SRR1022881_1.fastq.gz	ftp://ftp.sra.ebi.ac.uk/vol1/fastq/SRR102/001/SRR1022881/SRR1022881_2.fastq.gz	source_name: hypothalamus, high growth and fatness || breed: Iberian x Landrace backcross || tissue: hypothalamus || phenotype: high growth and fatness	hypothalamus	Iberian x Landrace backcross	unknown	unknown
70	SRS497445	Sus scrofa	PRJNA225941	SRR1022882	SRX372015	RNA-Seq	cDNA	TRANSCRIPTOMIC	PAIRED	15.44	152	ILLUMINA	Illumina HiSeq 2000	https://sra-download.ncbi.nlm.nih.gov/traces/sra14/SRR/000998/SRR1022882	ftp://ftp.sra.ebi.ac.uk/vol1/fastq/SRR102/002/SRR1022882/SRR1022882_1.fastq.gz	ftp://ftp.sra.ebi.ac.uk/vol1/fastq/SRR102/002/SRR1022882/SRR1022882_2.fastq.gz	source_name: hypothalamus, high growth and fatness || breed: Iberian x Landrace backcross || tissue: hypothalamus || phenotype: high growth and fatness	hypothalamus	Iberian x Landrace backcross	unknown	unknown
70	SRS497445	Sus scrofa	PRJNA225941	SRR1022883	SRX372015	RNA-Seq	cDNA	TRANSCRIPTOMIC	PAIRED	15.45	152	ILLUMINA	Illumina HiSeq 2000	https://sra-download.ncbi.nlm.nih.gov/traces/sra14/SRR/000998/SRR1022883	ftp://ftp.sra.ebi.ac.uk/vol1/fastq/SRR102/003/SRR1022883/SRR1022883_1.fastq.gz	ftp://ftp.sra.ebi.ac.uk/vol1/fastq/SRR102/003/SRR1022883/SRR1022883_2.fastq.gz	source_name: hypothalamus, high growth and fatness || breed: Iberian x Landrace backcross || tissue: hypothalamus || phenotype: high growth and fatness	hypothalamus	Iberian x Landrace backcross	unknown	unknown
70	SRS497445	Sus scrofa	PRJNA225941	SRR1022884	SRX372015	RNA-Seq	cDNA	TRANSCRIPTOMIC	PAIRED	19.86	152	ILLUMINA	Illumina HiSeq 2000	https://sra-download.ncbi.nlm.nih.gov/traces/sra14/SRR/000998/SRR1022884	ftp://ftp.sra.ebi.ac.uk/vol1/fastq/SRR102/004/SRR1022884/SRR1022884_1.fastq.gz	ftp://ftp.sra.ebi.ac.uk/vol1/fastq/SRR102/004/SRR1022884/SRR1022884_2.fastq.gz	source_name: hypothalamus, high growth and fatness || breed: Iberian x Landrace backcross || tissue: hypothalamus || phenotype: high growth and fatness	hypothalamus	Iberian x Landrace backcross	unknown	unknown
70	SRS497445	Sus scrofa	PRJNA225941	SRR1022885	SRX372015	RNA-Seq	cDNA	TRANSCRIPTOMIC	PAIRED	16.04	152	ILLUMINA	Illumina HiSeq 2000	https://sra-download.ncbi.nlm.nih.gov/traces/sra14/SRR/000998/SRR1022885	ftp://ftp.sra.ebi.ac.uk/vol1/fastq/SRR102/005/SRR1022885/SRR1022885_1.fastq.gz	ftp://ftp.sra.ebi.ac.uk/vol1/fastq/SRR102/005/SRR1022885/SRR1022885_2.fastq.gz	source_name: hypothalamus, high growth and fatness || breed: Iberian x Landrace backcross || tissue: hypothalamus || phenotype: high growth and fatness	hypothalamus	Iberian x Landrace backcross	unknown	unknown
71	SRS497446	Sus scrofa	PRJNA225941	SRR1022886	SRX372016	RNA-Seq	cDNA	TRANSCRIPTOMIC	PAIRED	12.91	152	ILLUMINA	Illumina HiSeq 2000	https://sra-download.ncbi.nlm.nih.gov/traces/sra14/SRR/000998/SRR1022886	ftp://ftp.sra.ebi.ac.uk/vol1/fastq/SRR102/006/SRR1022886/SRR1022886_1.fastq.gz	ftp://ftp.sra.ebi.ac.uk/vol1/fastq/SRR102/006/SRR1022886/SRR1022886_2.fastq.gz	source_name: hypothalamus, high growth and fatness || breed: Iberian x Landrace backcross || tissue: hypothalamus || phenotype: high growth and fatness	hypothalamus	Iberian x Landrace backcross	unknown	unknown
71	SRS497446	Sus scrofa	PRJNA225941	SRR1022887	SRX372016	RNA-Seq	cDNA	TRANSCRIPTOMIC	PAIRED	12.87	152	ILLUMINA	Illumina HiSeq 2000	https://sra-download.ncbi.nlm.nih.gov/traces/sra14/SRR/000998/SRR1022887	ftp://ftp.sra.ebi.ac.uk/vol1/fastq/SRR102/007/SRR1022887/SRR1022887_1.fastq.gz	ftp://ftp.sra.ebi.ac.uk/vol1/fastq/SRR102/007/SRR1022887/SRR1022887_2.fastq.gz	source_name: hypothalamus, high growth and fatness || breed: Iberian x Landrace backcross || tissue: hypothalamus || phenotype: high growth and fatness	hypothalamus	Iberian x Landrace backcross	unknown	unknown
71	SRS497446	Sus scrofa	PRJNA225941	SRR1022888	SRX372016	RNA-Seq	cDNA	TRANSCRIPTOMIC	PAIRED	12.16	152	ILLUMINA	Illumina HiSeq 2000	https://sra-download.ncbi.nlm.nih.gov/traces/sra14/SRR/000998/SRR1022888	ftp://ftp.sra.ebi.ac.uk/vol1/fastq/SRR102/008/SRR1022888/SRR1022888_1.fastq.gz	ftp://ftp.sra.ebi.ac.uk/vol1/fastq/SRR102/008/SRR1022888/SRR1022888_2.fastq.gz	source_name: hypothalamus, high growth and fatness || breed: Iberian x Landrace backcross || tissue: hypothalamus || phenotype: high growth and fatness	hypothalamus	Iberian x Landrace backcross	unknown	unknown
71	SRS497446	Sus scrofa	PRJNA225941	SRR1022889	SRX372016	RNA-Seq	cDNA	TRANSCRIPTOMIC	PAIRED	13.68	152	ILLUMINA	Illumina HiSeq 2000	https://sra-download.ncbi.nlm.nih.gov/traces/sra14/SRR/000998/SRR1022889	ftp://ftp.sra.ebi.ac.uk/vol1/fastq/SRR102/009/SRR1022889/SRR1022889_1.fastq.gz	ftp://ftp.sra.ebi.ac.uk/vol1/fastq/SRR102/009/SRR1022889/SRR1022889_2.fastq.gz	source_name: hypothalamus, high growth and fatness || breed: Iberian x Landrace backcross || tissue: hypothalamus || phenotype: high growth and fatness	hypothalamus	Iberian x Landrace backcross	unknown	unknown
72	SRS497447	Sus scrofa	PRJNA225941	SRR1022890	SRX372017	RNA-Seq	cDNA	TRANSCRIPTOMIC	PAIRED	13.07	152	ILLUMINA	Illumina HiSeq 2000	https://sra-download.ncbi.nlm.nih.gov/traces/sra14/SRR/000998/SRR1022890	ftp://ftp.sra.ebi.ac.uk/vol1/fastq/SRR102/000/SRR1022890/SRR1022890_1.fastq.gz	ftp://ftp.sra.ebi.ac.uk/vol1/fastq/SRR102/000/SRR1022890/SRR1022890_2.fastq.gz	source_name: hypothalamus, high growth and fatness || breed: Iberian x Landrace backcross || tissue: hypothalamus || phenotype: high growth and fatness	hypothalamus	Iberian x Landrace backcross	unknown	unknown
72	SRS497447	Sus scrofa	PRJNA225941	SRR1022891	SRX372017	RNA-Seq	cDNA	TRANSCRIPTOMIC	PAIRED	13.05	152	ILLUMINA	Illumina HiSeq 2000	https://sra-download.ncbi.nlm.nih.gov/traces/sra14/SRR/000998/SRR1022891	ftp://ftp.sra.ebi.ac.uk/vol1/fastq/SRR102/001/SRR1022891/SRR1022891_1.fastq.gz	ftp://ftp.sra.ebi.ac.uk/vol1/fastq/SRR102/001/SRR1022891/SRR1022891_2.fastq.gz	source_name: hypothalamus, high growth and fatness || breed: Iberian x Landrace backcross || tissue: hypothalamus || phenotype: high growth and fatness	hypothalamus	Iberian x Landrace backcross	unknown	unknown
72	SRS497447	Sus scrofa	PRJNA225941	SRR1022893	SRX372017	RNA-Seq	cDNA	TRANSCRIPTOMIC	PAIRED	13.89	152	ILLUMINA	Illumina HiSeq 2000	https://sra-download.ncbi.nlm.nih.gov/traces/sra14/SRR/000998/SRR1022893	ftp://ftp.sra.ebi.ac.uk/vol1/fastq/SRR102/003/SRR1022893/SRR1022893_1.fastq.gz	ftp://ftp.sra.ebi.ac.uk/vol1/fastq/SRR102/003/SRR1022893/SRR1022893_2.fastq.gz	source_name: hypothalamus, high growth and fatness || breed: Iberian x Landrace backcross || tissue: hypothalamus || phenotype: high growth and fatness	hypothalamus	Iberian x Landrace backcross	unknown	unknown
73	SRS497448	Sus scrofa	PRJNA225941	SRR1022894	SRX372018	RNA-Seq	cDNA	TRANSCRIPTOMIC	PAIRED	14.13	152	ILLUMINA	Illumina HiSeq 2000	https://sra-download.ncbi.nlm.nih.gov/traces/sra14/SRR/000998/SRR1022894	ftp://ftp.sra.ebi.ac.uk/vol1/fastq/SRR102/004/SRR1022894/SRR1022894_1.fastq.gz	ftp://ftp.sra.ebi.ac.uk/vol1/fastq/SRR102/004/SRR1022894/SRR1022894_2.fastq.gz	source_name: hypothalamus, low growth and fatness || breed: Iberian x Landrace backcross || tissue: hypothalamus || phenotype: low growth and fatness	hypothalamus	Iberian x Landrace backcross	unknown	unknown
73	SRS497448	Sus scrofa	PRJNA225941	SRR1022895	SRX372018	RNA-Seq	cDNA	TRANSCRIPTOMIC	PAIRED	14.11	152	ILLUMINA	Illumina HiSeq 2000	https://sra-download.ncbi.nlm.nih.gov/traces/sra14/SRR/000998/SRR1022895	ftp://ftp.sra.ebi.ac.uk/vol1/fastq/SRR102/005/SRR1022895/SRR1022895_1.fastq.gz	ftp://ftp.sra.ebi.ac.uk/vol1/fastq/SRR102/005/SRR1022895/SRR1022895_2.fastq.gz	source_name: hypothalamus, low growth and fatness || breed: Iberian x Landrace backcross || tissue: hypothalamus || phenotype: low growth and fatness	hypothalamus	Iberian x Landrace backcross	unknown	unknown
73	SRS497448	Sus scrofa	PRJNA225941	SRR1022897	SRX372018	RNA-Seq	cDNA	TRANSCRIPTOMIC	PAIRED	14.89	152	ILLUMINA	Illumina HiSeq 2000	https://sra-download.ncbi.nlm.nih.gov/traces/sra14/SRR/000998/SRR1022897	ftp://ftp.sra.ebi.ac.uk/vol1/fastq/SRR102/007/SRR1022897/SRR1022897_1.fastq.gz	ftp://ftp.sra.ebi.ac.uk/vol1/fastq/SRR102/007/SRR1022897/SRR1022897_2.fastq.gz	source_name: hypothalamus, low growth and fatness || breed: Iberian x Landrace backcross || tissue: hypothalamus || phenotype: low growth and fatness	hypothalamus	Iberian x Landrace backcross	unknown	unknown
74	SRS497449	Sus scrofa	PRJNA225941	SRR1022898	SRX372019	RNA-Seq	cDNA	TRANSCRIPTOMIC	PAIRED	13.82	152	ILLUMINA	Illumina HiSeq 2000	https://sra-download.ncbi.nlm.nih.gov/traces/sra14/SRR/000998/SRR1022898	ftp://ftp.sra.ebi.ac.uk/vol1/fastq/SRR102/008/SRR1022898/SRR1022898_1.fastq.gz	ftp://ftp.sra.ebi.ac.uk/vol1/fastq/SRR102/008/SRR1022898/SRR1022898_2.fastq.gz	source_name: hypothalamus, low growth and fatness || breed: Iberian x Landrace backcross || tissue: hypothalamus || phenotype: low growth and fatness	hypothalamus	Iberian x Landrace backcross	unknown	unknown
74	SRS497449	Sus scrofa	PRJNA225941	SRR1022899	SRX372019	RNA-Seq	cDNA	TRANSCRIPTOMIC	PAIRED	13.81	152	ILLUMINA	Illumina HiSeq 2000	https://sra-download.ncbi.nlm.nih.gov/traces/sra14/SRR/000998/SRR1022899	ftp://ftp.sra.ebi.ac.uk/vol1/fastq/SRR102/009/SRR1022899/SRR1022899_1.fastq.gz	ftp://ftp.sra.ebi.ac.uk/vol1/fastq/SRR102/009/SRR1022899/SRR1022899_2.fastq.gz	source_name: hypothalamus, low growth and fatness || breed: Iberian x Landrace backcross || tissue: hypothalamus || phenotype: low growth and fatness	hypothalamus	Iberian x Landrace backcross	unknown	unknown
74	SRS497449	Sus scrofa	PRJNA225941	SRR1022900	SRX372019	RNA-Seq	cDNA	TRANSCRIPTOMIC	PAIRED	10.86	152	ILLUMINA	Illumina HiSeq 2000	https://sra-download.ncbi.nlm.nih.gov/traces/sra14/SRR/000998/SRR1022900	ftp://ftp.sra.ebi.ac.uk/vol1/fastq/SRR102/000/SRR1022900/SRR1022900_1.fastq.gz	ftp://ftp.sra.ebi.ac.uk/vol1/fastq/SRR102/000/SRR1022900/SRR1022900_2.fastq.gz	source_name: hypothalamus, low growth and fatness || breed: Iberian x Landrace backcross || tissue: hypothalamus || phenotype: low growth and fatness	hypothalamus	Iberian x Landrace backcross	unknown	unknown
74	SRS497449	Sus scrofa	PRJNA225941	SRR1022901	SRX372019	RNA-Seq	cDNA	TRANSCRIPTOMIC	PAIRED	14.6	152	ILLUMINA	Illumina HiSeq 2000	https://sra-download.ncbi.nlm.nih.gov/traces/sra14/SRR/000998/SRR1022901	ftp://ftp.sra.ebi.ac.uk/vol1/fastq/SRR102/001/SRR1022901/SRR1022901_1.fastq.gz	ftp://ftp.sra.ebi.ac.uk/vol1/fastq/SRR102/001/SRR1022901/SRR1022901_2.fastq.gz	source_name: hypothalamus, low growth and fatness || breed: Iberian x Landrace backcross || tissue: hypothalamus || phenotype: low growth and fatness	hypothalamus	Iberian x Landrace backcross	unknown	unknown
75	SRS497450	Sus scrofa	PRJNA225941	SRR1022902	SRX372020	RNA-Seq	cDNA	TRANSCRIPTOMIC	PAIRED	11.42	152	ILLUMINA	Illumina HiSeq 2000	https://sra-download.ncbi.nlm.nih.gov/traces/sra14/SRR/000998/SRR1022902	ftp://ftp.sra.ebi.ac.uk/vol1/fastq/SRR102/002/SRR1022902/SRR1022902_1.fastq.gz	ftp://ftp.sra.ebi.ac.uk/vol1/fastq/SRR102/002/SRR1022902/SRR1022902_2.fastq.gz	source_name: hypothalamus, low growth and fatness || breed: Iberian x Landrace backcross || tissue: hypothalamus || phenotype: low growth and fatness	hypothalamus	Iberian x Landrace backcross	unknown	unknown
75	SRS497450	Sus scrofa	PRJNA225941	SRR1022903	SRX372020	RNA-Seq	cDNA	TRANSCRIPTOMIC	PAIRED	11.4	152	ILLUMINA	Illumina HiSeq 2000	https://sra-download.ncbi.nlm.nih.gov/traces/sra14/SRR/000998/SRR1022903	ftp://ftp.sra.ebi.ac.uk/vol1/fastq/SRR102/003/SRR1022903/SRR1022903_1.fastq.gz	ftp://ftp.sra.ebi.ac.uk/vol1/fastq/SRR102/003/SRR1022903/SRR1022903_2.fastq.gz	source_name: hypothalamus, low growth and fatness || breed: Iberian x Landrace backcross || tissue: hypothalamus || phenotype: low growth and fatness	hypothalamus	Iberian x Landrace backcross	unknown	unknown
75	SRS497450	Sus scrofa	PRJNA225941	SRR1022905	SRX372020	RNA-Seq	cDNA	TRANSCRIPTOMIC	PAIRED	12.08	152	ILLUMINA	Illumina HiSeq 2000	https://sra-download.ncbi.nlm.nih.gov/traces/sra14/SRR/000998/SRR1022905	ftp://ftp.sra.ebi.ac.uk/vol1/fastq/SRR102/005/SRR1022905/SRR1022905_1.fastq.gz	ftp://ftp.sra.ebi.ac.uk/vol1/fastq/SRR102/005/SRR1022905/SRR1022905_2.fastq.gz	source_name: hypothalamus, low growth and fatness || breed: Iberian x Landrace backcross || tissue: hypothalamus || phenotype: low growth and fatness	hypothalamus	Iberian x Landrace backcross	unknown	unknown
76	SRS497451	Sus scrofa	PRJNA225941	SRR1022906	SRX372021	RNA-Seq	cDNA	TRANSCRIPTOMIC	PAIRED	13.69	152	ILLUMINA	Illumina HiSeq 2000	https://sra-download.ncbi.nlm.nih.gov/traces/sra14/SRR/000998/SRR1022906	ftp://ftp.sra.ebi.ac.uk/vol1/fastq/SRR102/006/SRR1022906/SRR1022906_1.fastq.gz	ftp://ftp.sra.ebi.ac.uk/vol1/fastq/SRR102/006/SRR1022906/SRR1022906_2.fastq.gz	source_name: hypothalamus, low growth and fatness || breed: Iberian x Landrace backcross || tissue: hypothalamus || phenotype: low growth and fatness	hypothalamus	Iberian x Landrace backcross	unknown	unknown
76	SRS497451	Sus scrofa	PRJNA225941	SRR1022907	SRX372021	RNA-Seq	cDNA	TRANSCRIPTOMIC	PAIRED	13.67	152	ILLUMINA	Illumina HiSeq 2000	https://sra-download.ncbi.nlm.nih.gov/traces/sra14/SRR/000998/SRR1022907	ftp://ftp.sra.ebi.ac.uk/vol1/fastq/SRR102/007/SRR1022907/SRR1022907_1.fastq.gz	ftp://ftp.sra.ebi.ac.uk/vol1/fastq/SRR102/007/SRR1022907/SRR1022907_2.fastq.gz	source_name: hypothalamus, low growth and fatness || breed: Iberian x Landrace backcross || tissue: hypothalamus || phenotype: low growth and fatness	hypothalamus	Iberian x Landrace backcross	unknown	unknown
76	SRS497451	Sus scrofa	PRJNA225941	SRR1022908	SRX372021	RNA-Seq	cDNA	TRANSCRIPTOMIC	PAIRED	11.55	152	ILLUMINA	Illumina HiSeq 2000	https://sra-download.ncbi.nlm.nih.gov/traces/sra14/SRR/000998/SRR1022908	ftp://ftp.sra.ebi.ac.uk/vol1/fastq/SRR102/008/SRR1022908/SRR1022908_1.fastq.gz	ftp://ftp.sra.ebi.ac.uk/vol1/fastq/SRR102/008/SRR1022908/SRR1022908_2.fastq.gz	source_name: hypothalamus, low growth and fatness || breed: Iberian x Landrace backcross || tissue: hypothalamus || phenotype: low growth and fatness	hypothalamus	Iberian x Landrace backcross	unknown	unknown
76	SRS497451	Sus scrofa	PRJNA225941	SRR1022909	SRX372021	RNA-Seq	cDNA	TRANSCRIPTOMIC	PAIRED	14.4	152	ILLUMINA	Illumina HiSeq 2000	https://sra-download.ncbi.nlm.nih.gov/traces/sra14/SRR/000998/SRR1022909	ftp://ftp.sra.ebi.ac.uk/vol1/fastq/SRR102/009/SRR1022909/SRR1022909_1.fastq.gz	ftp://ftp.sra.ebi.ac.uk/vol1/fastq/SRR102/009/SRR1022909/SRR1022909_2.fastq.gz	source_name: hypothalamus, low growth and fatness || breed: Iberian x Landrace backcross || tissue: hypothalamus || phenotype: low growth and fatness	hypothalamus	Iberian x Landrace backcross	unknown	unknown
77	SRS497452	Sus scrofa	PRJNA225941	SRR1022910	SRX372022	RNA-Seq	cDNA	TRANSCRIPTOMIC	PAIRED	14.83	152	ILLUMINA	Illumina HiSeq 2000	https://sra-download.ncbi.nlm.nih.gov/traces/sra14/SRR/000998/SRR1022910	ftp://ftp.sra.ebi.ac.uk/vol1/fastq/SRR102/000/SRR1022910/SRR1022910_1.fastq.gz	ftp://ftp.sra.ebi.ac.uk/vol1/fastq/SRR102/000/SRR1022910/SRR1022910_2.fastq.gz	source_name: hypothalamus, low growth and fatness || breed: Iberian x Landrace backcross || tissue: hypothalamus || phenotype: low growth and fatness	hypothalamus	Iberian x Landrace backcross	unknown	unknown
77	SRS497452	Sus scrofa	PRJNA225941	SRR1022911	SRX372022	RNA-Seq	cDNA	TRANSCRIPTOMIC	PAIRED	14.83	152	ILLUMINA	Illumina HiSeq 2000	https://sra-download.ncbi.nlm.nih.gov/traces/sra14/SRR/000998/SRR1022911	ftp://ftp.sra.ebi.ac.uk/vol1/fastq/SRR102/001/SRR1022911/SRR1022911_1.fastq.gz	ftp://ftp.sra.ebi.ac.uk/vol1/fastq/SRR102/001/SRR1022911/SRR1022911_2.fastq.gz	source_name: hypothalamus, low growth and fatness || breed: Iberian x Landrace backcross || tissue: hypothalamus || phenotype: low growth and fatness	hypothalamus	Iberian x Landrace backcross	unknown	unknown
77	SRS497452	Sus scrofa	PRJNA225941	SRR1022912	SRX372022	RNA-Seq	cDNA	TRANSCRIPTOMIC	PAIRED	12.74	152	ILLUMINA	Illumina HiSeq 2000	https://sra-download.ncbi.nlm.nih.gov/traces/sra14/SRR/000998/SRR1022912	ftp://ftp.sra.ebi.ac.uk/vol1/fastq/SRR102/002/SRR1022912/SRR1022912_1.fastq.gz	ftp://ftp.sra.ebi.ac.uk/vol1/fastq/SRR102/002/SRR1022912/SRR1022912_2.fastq.gz	source_name: hypothalamus, low growth and fatness || breed: Iberian x Landrace backcross || tissue: hypothalamus || phenotype: low growth and fatness	hypothalamus	Iberian x Landrace backcross	unknown	unknown
77	SRS497452	Sus scrofa	PRJNA225941	SRR1022913	SRX372022	RNA-Seq	cDNA	TRANSCRIPTOMIC	PAIRED	15.61	152	ILLUMINA	Illumina HiSeq 2000	https://sra-download.ncbi.nlm.nih.gov/traces/sra14/SRR/000998/SRR1022913	ftp://ftp.sra.ebi.ac.uk/vol1/fastq/SRR102/003/SRR1022913/SRR1022913_1.fastq.gz	ftp://ftp.sra.ebi.ac.uk/vol1/fastq/SRR102/003/SRR1022913/SRR1022913_2.fastq.gz	source_name: hypothalamus, low growth and fatness || breed: Iberian x Landrace backcross || tissue: hypothalamus || phenotype: low growth and fatness	hypothalamus	Iberian x Landrace backcross	unknown	unknown
78	SRS529088	Sus scrofa	PRJNA234335	SRR1107684	SRX425445	RNA-Seq	cDNA	TRANSCRIPTOMIC	PAIRED	26.95	180	ILLUMINA	Illumina HiSeq 2000	https://sra-download.ncbi.nlm.nih.gov/traces/sra36/SRR/001081/SRR1107684	ftp://ftp.sra.ebi.ac.uk/vol1/fastq/SRR110/004/SRR1107684/SRR1107684_1.fastq.gz	ftp://ftp.sra.ebi.ac.uk/vol1/fastq/SRR110/004/SRR1107684/SRR1107684_2.fastq.gz	breed: songliao black pigs || isolate: RNA || geo_loc_name: tianjin,China || age: 218 days || body_site: the backfat of last three or four ribs || backfat thickness of live(mm): 24.9 || sex: female || tissue_type: backfat	backfat	songliao black pigs	218 days	female
79	SRS529091	Sus scrofa	PRJNA234335	SRR1107703	SRX425450	RNA-Seq	cDNA	TRANSCRIPTOMIC	PAIRED	26.95	180	ILLUMINA	Illumina HiSeq 2000	https://sra-download.ncbi.nlm.nih.gov/traces/sra36/SRR/001081/SRR1107703	ftp://ftp.sra.ebi.ac.uk/vol1/fastq/SRR110/003/SRR1107703/SRR1107703_1.fastq.gz	ftp://ftp.sra.ebi.ac.uk/vol1/fastq/SRR110/003/SRR1107703/SRR1107703_2.fastq.gz	breed: songliao black pigs || isolate: RNA || geo_loc_name: tianjin,China || age: 218 days || body_site: the backfat of last three or four ribs || backfat thickness of live(mm): 9.4 || sex: female || tissue_type: backfat	backfat	songliao black pigs	218 days	female
80	SRS529092	Sus scrofa	PRJNA234335	SRR1107709	SRX425451	RNA-Seq	cDNA	TRANSCRIPTOMIC	PAIRED	25.65	180	ILLUMINA	Illumina HiSeq 2000	https://sra-download.ncbi.nlm.nih.gov/traces/sra36/SRR/001081/SRR1107709	ftp://ftp.sra.ebi.ac.uk/vol1/fastq/SRR110/009/SRR1107709/SRR1107709_1.fastq.gz	ftp://ftp.sra.ebi.ac.uk/vol1/fastq/SRR110/009/SRR1107709/SRR1107709_2.fastq.gz	breed: songliao black pigs || isolate: RNA || geo_loc_name: tianjin,China || age: 216 days || body_site: the backfat of last three or four ribs || backfat thickness of live(mm): 21.7 || sex: female || tissue_type: backfat	backfat	songliao black pigs	216 days	female
81	SRS529093	Sus scrofa	PRJNA234335	SRR1107711	SRX425452	RNA-Seq	cDNA	TRANSCRIPTOMIC	PAIRED	26.71	180	ILLUMINA	Illumina HiSeq 2000	https://sra-download.ncbi.nlm.nih.gov/traces/sra36/SRR/001081/SRR1107711	ftp://ftp.sra.ebi.ac.uk/vol1/fastq/SRR110/001/SRR1107711/SRR1107711_1.fastq.gz	ftp://ftp.sra.ebi.ac.uk/vol1/fastq/SRR110/001/SRR1107711/SRR1107711_2.fastq.gz	breed: songliao black pigs || isolate: RNA || geo_loc_name: tianjin,China || age: 216 days || body_site: the backfat of last three or four ribs || backfat thickness of live(mm): 8.8 || sex: female || tissue_type: backfat	backfat	songliao black pigs	216 days	female
82	SRS529094	Sus scrofa	PRJNA234335	SRR1107716	SRX425453	RNA-Seq	cDNA	TRANSCRIPTOMIC	PAIRED	24.57	180	ILLUMINA	Illumina HiSeq 2000	https://sra-download.ncbi.nlm.nih.gov/traces/sra36/SRR/001081/SRR1107716	ftp://ftp.sra.ebi.ac.uk/vol1/fastq/SRR110/006/SRR1107716/SRR1107716_1.fastq.gz	ftp://ftp.sra.ebi.ac.uk/vol1/fastq/SRR110/006/SRR1107716/SRR1107716_2.fastq.gz	breed: songliao black pigs || isolate: RNA || geo_loc_name: tianjin,China || age: 211 days || body_site: the backfat of last three or four ribs || backfat thickness of live(mm): 28.4 || sex: female || tissue_type: backfat	backfat	songliao black pigs	211 days	female
83	SRS529095	Sus scrofa	PRJNA234335	SRR1107718	SRX425454	RNA-Seq	cDNA	TRANSCRIPTOMIC	PAIRED	26.31	180	ILLUMINA	Illumina HiSeq 2000	https://sra-download.ncbi.nlm.nih.gov/traces/sra36/SRR/001081/SRR1107718	ftp://ftp.sra.ebi.ac.uk/vol1/fastq/SRR110/008/SRR1107718/SRR1107718_1.fastq.gz	ftp://ftp.sra.ebi.ac.uk/vol1/fastq/SRR110/008/SRR1107718/SRR1107718_2.fastq.gz	breed: songliao black pigs || isolate: RNA || geo_loc_name: tianjin,China || age: 218 days || body_site: the backfat of last three or four ribs || backfat thickness of live(mm): 5.6 || sex: female || tissue_type: backfat	backfat	songliao black pigs	218 days	female
84	SRS529859	Sus scrofa	PRJNA234465	SRR1107727	SRX426310	RNA-Seq	cDNA	TRANSCRIPTOMIC	PAIRED	27.44	180	ILLUMINA	Illumina HiSeq 2000	https://sra-download.ncbi.nlm.nih.gov/traces/sra36/SRR/001081/SRR1107727	ftp://ftp.sra.ebi.ac.uk/vol1/fastq/SRR110/007/SRR1107727/SRR1107727_1.fastq.gz	ftp://ftp.sra.ebi.ac.uk/vol1/fastq/SRR110/007/SRR1107727/SRR1107727_2.fastq.gz	breed: songliao black pigs || isolate: RNA || geo_loc_name: tianjin,China || age: 218 days || backfat thickness of live(mm): 24.9 || sex: female || tissue_type: liver	liver	songliao black pigs	218 days	female
85	SRS529863	Sus scrofa	PRJNA234465	SRR1107728	SRX426312	RNA-Seq	cDNA	TRANSCRIPTOMIC	PAIRED	25.78	180	ILLUMINA	Illumina HiSeq 2000	https://sra-download.ncbi.nlm.nih.gov/traces/sra36/SRR/001081/SRR1107728	ftp://ftp.sra.ebi.ac.uk/vol1/fastq/SRR110/008/SRR1107728/SRR1107728_1.fastq.gz	ftp://ftp.sra.ebi.ac.uk/vol1/fastq/SRR110/008/SRR1107728/SRR1107728_2.fastq.gz	breed: songliao black pigs || isolate: RNA || geo_loc_name: tianjin,China || age: 218 days || backfat thickness of live(mm): 9.4 || sex: female || tissue_type: liver	liver	songliao black pigs	218 days	female
86	SRS529865	Sus scrofa	PRJNA234465	SRR1107730	SRX426314	RNA-Seq	cDNA	TRANSCRIPTOMIC	PAIRED	26.08	180	ILLUMINA	Illumina HiSeq 2000	https://sra-download.ncbi.nlm.nih.gov/traces/sra36/SRR/001081/SRR1107730	ftp://ftp.sra.ebi.ac.uk/vol1/fastq/SRR110/000/SRR1107730/SRR1107730_1.fastq.gz	ftp://ftp.sra.ebi.ac.uk/vol1/fastq/SRR110/000/SRR1107730/SRR1107730_2.fastq.gz	breed: songliao black pigs || isolate: RNA || geo_loc_name: tianjin,China || age: 216 days || backfat thickness of live(mm): 21.7 || sex: female || tissue_type: liver	liver	songliao black pigs	216 days	female
87	SRS1859923	Sus scrofa	PRJNA237914	SRR5110497	SRX2422855	RNA-Seq	cDNA	TRANSCRIPTOMIC	PAIRED	16.03	200	ILLUMINA	Illumina Genome Analyzer II	https://sra-download.ncbi.nlm.nih.gov/traces/sra44/SRR/004990/SRR5110497	ftp://ftp.sra.ebi.ac.uk/vol1/fastq/SRR511/007/SRR5110497/SRR5110497_1.fastq.gz	ftp://ftp.sra.ebi.ac.uk/vol1/fastq/SRR511/007/SRR5110497/SRR5110497_2.fastq.gz	breed: swine || strain: domestic || age: 1 || biomaterial_provider: Prather lab || sex: Female || tissue: Oocyte || birth_date: null || birth_location: Columbia, MO || breeding_history: null || breeding_method: null || cell_line: null || cell_subtype: null || cell_type: null || collected_by: null || collection_date: null || culture_collection: null || death_date: null || dev_stage: null || diseas…	Oocyte	swine	1	Female
88	SRS979544	Sus scrofa	PRJNA237914	SRR2088056	SRX1081813	RNA-Seq	cDNA	TRANSCRIPTOMIC	PAIRED	16.16	200	ILLUMINA	Illumina Genome Analyzer II	https://sra-download.ncbi.nlm.nih.gov/traces/sra31/SRR/002039/SRR2088056	ftp://ftp.sra.ebi.ac.uk/vol1/fastq/SRR208/006/SRR2088056/SRR2088056_1.fastq.gz	ftp://ftp.sra.ebi.ac.uk/vol1/fastq/SRR208/006/SRR2088056/SRR2088056_2.fastq.gz	breed: swine || strain: domestic || age: 1 || biomaterial_provider: Prather lab || sex: Female || tissue: Oocyte || birth_date: null || birth_location: Columbia, MO || breeding_history: null || breeding_method: null || cell_line: null || cell_subtype: null || cell_type: null || collected_by: null || collection_date: null || culture_collection: null || death_date: null || dev_stage: null || diseas…	Oocyte	swine	1	Female
89	SRS567062	Sus scrofa	PRJNA240332	SRR1185124	SRX482546	RNA-Seq	cDNA	TRANSCRIPTOMIC	PAIRED	12.14	100	ILLUMINA	Illumina HiSeq 2000	https://sra-download.ncbi.nlm.nih.gov/traces/sra17/SRR/001157/SRR1185124	ftp://ftp.sra.ebi.ac.uk/vol1/fastq/SRR118/004/SRR1185124/SRR1185124_1.fastq.gz	ftp://ftp.sra.ebi.ac.uk/vol1/fastq/SRR118/004/SRR1185124/SRR1185124_2.fastq.gz	source_name: Liver || tissue: liver || strain: Yorkshire-Landrace || fed status: Fasted || survival: Lived || time point: 8 hours after resuscitation began || tissue: liver biopsy	liver	Yorkshire-Landrace	unknown	unknown
90	SRS567063	Sus scrofa	PRJNA240332	SRR1185123	SRX482545	RNA-Seq	cDNA	TRANSCRIPTOMIC	PAIRED	11.39	100	ILLUMINA	Illumina HiSeq 2000	https://sra-download.ncbi.nlm.nih.gov/traces/sra17/SRR/001157/SRR1185123	ftp://ftp.sra.ebi.ac.uk/vol1/fastq/SRR118/003/SRR1185123/SRR1185123_1.fastq.gz	ftp://ftp.sra.ebi.ac.uk/vol1/fastq/SRR118/003/SRR1185123/SRR1185123_2.fastq.gz	source_name: Liver || tissue: liver || strain: Yorkshire-Landrace || fed status: Fasted || survival: Lived || time point: 2 hours after resuscitation began || tissue: liver biopsy	liver	Yorkshire-Landrace	unknown	unknown
91	SRS567064	Sus scrofa	PRJNA240332	SRR1185125	SRX482547	RNA-Seq	cDNA	TRANSCRIPTOMIC	PAIRED	11.08	100	ILLUMINA	Illumina HiSeq 2000	https://sra-download.ncbi.nlm.nih.gov/traces/sra17/SRR/001157/SRR1185125	ftp://ftp.sra.ebi.ac.uk/vol1/fastq/SRR118/005/SRR1185125/SRR1185125_1.fastq.gz	ftp://ftp.sra.ebi.ac.uk/vol1/fastq/SRR118/005/SRR1185125/SRR1185125_2.fastq.gz	source_name: Liver || tissue: liver || strain: Yorkshire-Landrace || fed status: Fasted || survival: Lived || time point: 20 hours after resuscitation began || tissue: liver biopsy	liver	Yorkshire-Landrace	unknown	unknown
92	SRS567066	Sus scrofa	PRJNA240332	SRR1185127	SRX482549	RNA-Seq	cDNA	TRANSCRIPTOMIC	PAIRED	10.58	100	ILLUMINA	Illumina HiSeq 2000	https://sra-download.ncbi.nlm.nih.gov/traces/sra17/SRR/001157/SRR1185127	ftp://ftp.sra.ebi.ac.uk/vol1/fastq/SRR118/007/SRR1185127/SRR1185127_1.fastq.gz	ftp://ftp.sra.ebi.ac.uk/vol1/fastq/SRR118/007/SRR1185127/SRR1185127_2.fastq.gz	source_name: Liver || tissue: liver || strain: Yorkshire-Landrace || fed status: Fasted || survival: Died || time point: 2 hours after resuscitation began || tissue: liver biopsy	liver	Yorkshire-Landrace	unknown	unknown
93	SRS567067	Sus scrofa	PRJNA240332	SRR1185128	SRX482550	RNA-Seq	cDNA	TRANSCRIPTOMIC	PAIRED	12.17	100	ILLUMINA	Illumina HiSeq 2000	https://sra-download.ncbi.nlm.nih.gov/traces/sra17/SRR/001157/SRR1185128	ftp://ftp.sra.ebi.ac.uk/vol1/fastq/SRR118/008/SRR1185128/SRR1185128_1.fastq.gz	ftp://ftp.sra.ebi.ac.uk/vol1/fastq/SRR118/008/SRR1185128/SRR1185128_2.fastq.gz	source_name: Liver || tissue: liver || strain: Yorkshire-Landrace || fed status: Fasted || survival: Died || time point: 8 hours after resuscitation began || tissue: liver biopsy	liver	Yorkshire-Landrace	unknown	unknown
94	SRS567068	Sus scrofa	PRJNA240332	SRR1185129	SRX482551	RNA-Seq	cDNA	TRANSCRIPTOMIC	PAIRED	11.64	100	ILLUMINA	Illumina HiSeq 2000	https://sra-download.ncbi.nlm.nih.gov/traces/sra17/SRR/001157/SRR1185129	ftp://ftp.sra.ebi.ac.uk/vol1/fastq/SRR118/009/SRR1185129/SRR1185129_1.fastq.gz	ftp://ftp.sra.ebi.ac.uk/vol1/fastq/SRR118/009/SRR1185129/SRR1185129_2.fastq.gz	source_name: Liver || tissue: liver || strain: Yorkshire-Landrace || fed status: Fasted || survival: Died || time point: 20 hours after resuscitation began || tissue: liver biopsy	liver	Yorkshire-Landrace	unknown	unknown
95	SRS567069	Sus scrofa	PRJNA240332	SRR1185130	SRX482552	RNA-Seq	cDNA	TRANSCRIPTOMIC	PAIRED	10.61	100	ILLUMINA	Illumina HiSeq 2000	https://sra-download.ncbi.nlm.nih.gov/traces/sra17/SRR/001157/SRR1185130	ftp://ftp.sra.ebi.ac.uk/vol1/fastq/SRR118/000/SRR1185130/SRR1185130_1.fastq.gz	ftp://ftp.sra.ebi.ac.uk/vol1/fastq/SRR118/000/SRR1185130/SRR1185130_2.fastq.gz	source_name: Liver || tissue: liver || strain: Yorkshire-Landrace || fed status: Fasted || survival: Died || time point: Baseline || tissue: liver biopsy	liver	Yorkshire-Landrace	unknown	unknown
96	SRS567070	Sus scrofa	PRJNA240332	SRR1185131	SRX482553	RNA-Seq	cDNA	TRANSCRIPTOMIC	PAIRED	11.59	100	ILLUMINA	Illumina HiSeq 2000	https://sra-download.ncbi.nlm.nih.gov/traces/sra17/SRR/001157/SRR1185131	ftp://ftp.sra.ebi.ac.uk/vol1/fastq/SRR118/001/SRR1185131/SRR1185131_1.fastq.gz	ftp://ftp.sra.ebi.ac.uk/vol1/fastq/SRR118/001/SRR1185131/SRR1185131_2.fastq.gz	source_name: Liver || tissue: liver || strain: Yorkshire-Landrace || fed status: Carbohydrate Prefed || survival: Lived || time point: 2 hours after resuscitation began || tissue: liver biopsy	liver	Yorkshire-Landrace	unknown	unknown
97	SRS567074	Sus scrofa	PRJNA240332	SRR1185135	SRX482557	RNA-Seq	cDNA	TRANSCRIPTOMIC	PAIRED	12.17	100	ILLUMINA	Illumina HiSeq 2000	https://sra-download.ncbi.nlm.nih.gov/traces/sra17/SRR/001157/SRR1185135	ftp://ftp.sra.ebi.ac.uk/vol1/fastq/SRR118/005/SRR1185135/SRR1185135_1.fastq.gz	ftp://ftp.sra.ebi.ac.uk/vol1/fastq/SRR118/005/SRR1185135/SRR1185135_2.fastq.gz	source_name: Liver || tissue: liver || strain: Yorkshire-Landrace || fed status: Fasted || survival: Lived || time point: 2 hours after resuscitation began || tissue: liver biopsy	liver	Yorkshire-Landrace	unknown	unknown
98	SRS567075	Sus scrofa	PRJNA240332	SRR1185136	SRX482558	RNA-Seq	cDNA	TRANSCRIPTOMIC	PAIRED	12.87	100	ILLUMINA	Illumina HiSeq 2000	https://sra-download.ncbi.nlm.nih.gov/traces/sra17/SRR/001157/SRR1185136	ftp://ftp.sra.ebi.ac.uk/vol1/fastq/SRR118/006/SRR1185136/SRR1185136_1.fastq.gz	ftp://ftp.sra.ebi.ac.uk/vol1/fastq/SRR118/006/SRR1185136/SRR1185136_2.fastq.gz	source_name: Liver || tissue: liver || strain: Yorkshire-Landrace || fed status: Fasted || survival: Lived || time point: 8 hours after resuscitation began || tissue: liver biopsy	liver	Yorkshire-Landrace	unknown	unknown
99	SRS567076	Sus scrofa	PRJNA240332	SRR1185137	SRX482559	RNA-Seq	cDNA	TRANSCRIPTOMIC	PAIRED	10.51	100	ILLUMINA	Illumina HiSeq 2000	https://sra-download.ncbi.nlm.nih.gov/traces/sra17/SRR/001157/SRR1185137	ftp://ftp.sra.ebi.ac.uk/vol1/fastq/SRR118/007/SRR1185137/SRR1185137_1.fastq.gz	ftp://ftp.sra.ebi.ac.uk/vol1/fastq/SRR118/007/SRR1185137/SRR1185137_2.fastq.gz	source_name: Liver || tissue: liver || strain: Yorkshire-Landrace || fed status: Fasted || survival: Lived || time point: 20 hours after resuscitation began || tissue: liver biopsy	liver	Yorkshire-Landrace	unknown	unknown
100	SRS567077	Sus scrofa	PRJNA240332	SRR1185138	SRX482560	RNA-Seq	cDNA	TRANSCRIPTOMIC	PAIRED	11.89	100	ILLUMINA	Illumina HiSeq 2000	https://sra-download.ncbi.nlm.nih.gov/traces/sra17/SRR/001157/SRR1185138	ftp://ftp.sra.ebi.ac.uk/vol1/fastq/SRR118/008/SRR1185138/SRR1185138_1.fastq.gz	ftp://ftp.sra.ebi.ac.uk/vol1/fastq/SRR118/008/SRR1185138/SRR1185138_2.fastq.gz	source_name: Liver || tissue: liver || strain: Yorkshire-Landrace || fed status: Fasted || survival: Lived || time point: Baseline || tissue: liver biopsy	liver	Yorkshire-Landrace	unknown	unknown
101	SRS567078	Sus scrofa	PRJNA240332	SRR1185139	SRX482561	RNA-Seq	cDNA	TRANSCRIPTOMIC	PAIRED	11.57	100	ILLUMINA	Illumina HiSeq 2000	https://sra-download.ncbi.nlm.nih.gov/traces/sra17/SRR/001157/SRR1185139	ftp://ftp.sra.ebi.ac.uk/vol1/fastq/SRR118/009/SRR1185139/SRR1185139_1.fastq.gz	ftp://ftp.sra.ebi.ac.uk/vol1/fastq/SRR118/009/SRR1185139/SRR1185139_2.fastq.gz	source_name: Liver || tissue: liver || strain: Yorkshire-Landrace || fed status: Fasted || survival: Lived || time point: 2 hours after resuscitation began || tissue: liver biopsy	liver	Yorkshire-Landrace	unknown	unknown
102	SRS567079	Sus scrofa	PRJNA240332	SRR1185140	SRX482562	RNA-Seq	cDNA	TRANSCRIPTOMIC	PAIRED	13.11	100	ILLUMINA	Illumina HiSeq 2000	https://sra-download.ncbi.nlm.nih.gov/traces/sra17/SRR/001157/SRR1185140	ftp://ftp.sra.ebi.ac.uk/vol1/fastq/SRR118/000/SRR1185140/SRR1185140_1.fastq.gz	ftp://ftp.sra.ebi.ac.uk/vol1/fastq/SRR118/000/SRR1185140/SRR1185140_2.fastq.gz	source_name: Liver || tissue: liver || strain: Yorkshire-Landrace || fed status: Fasted || survival: Lived || time point: 8 hours after resuscitation began || tissue: liver biopsy	liver	Yorkshire-Landrace	unknown	unknown
103	SRS567080	Sus scrofa	PRJNA240332	SRR1185141	SRX482563	RNA-Seq	cDNA	TRANSCRIPTOMIC	PAIRED	12.92	100	ILLUMINA	Illumina HiSeq 2000	https://sra-download.ncbi.nlm.nih.gov/traces/sra17/SRR/001157/SRR1185141	ftp://ftp.sra.ebi.ac.uk/vol1/fastq/SRR118/001/SRR1185141/SRR1185141_1.fastq.gz	ftp://ftp.sra.ebi.ac.uk/vol1/fastq/SRR118/001/SRR1185141/SRR1185141_2.fastq.gz	source_name: Liver || tissue: liver || strain: Yorkshire-Landrace || fed status: Fasted || survival: Lived || time point: 20 hours after resuscitation began || tissue: liver biopsy	liver	Yorkshire-Landrace	unknown	unknown
104	SRS567081	Sus scrofa	PRJNA240332	SRR1185142	SRX482564	RNA-Seq	cDNA	TRANSCRIPTOMIC	PAIRED	15.2	100	ILLUMINA	Illumina HiSeq 2000	https://sra-download.ncbi.nlm.nih.gov/traces/sra17/SRR/001157/SRR1185142	ftp://ftp.sra.ebi.ac.uk/vol1/fastq/SRR118/002/SRR1185142/SRR1185142_1.fastq.gz	ftp://ftp.sra.ebi.ac.uk/vol1/fastq/SRR118/002/SRR1185142/SRR1185142_2.fastq.gz	source_name: Liver || tissue: liver || strain: Yorkshire-Landrace || fed status: Fasted || survival: Lived || time point: Baseline || tissue: liver biopsy	liver	Yorkshire-Landrace	unknown	unknown
105	SRS567082	Sus scrofa	PRJNA240332	SRR1185143	SRX482565	RNA-Seq	cDNA	TRANSCRIPTOMIC	PAIRED	11.76	100	ILLUMINA	Illumina HiSeq 2000	https://sra-download.ncbi.nlm.nih.gov/traces/sra17/SRR/001157/SRR1185143	ftp://ftp.sra.ebi.ac.uk/vol1/fastq/SRR118/003/SRR1185143/SRR1185143_1.fastq.gz	ftp://ftp.sra.ebi.ac.uk/vol1/fastq/SRR118/003/SRR1185143/SRR1185143_2.fastq.gz	source_name: Liver || tissue: liver || strain: Yorkshire-Landrace || fed status: Fasted || survival: Lived || time point: 2 hours after resuscitation began || tissue: liver biopsy	liver	Yorkshire-Landrace	unknown	unknown
106	SRS567083	Sus scrofa	PRJNA240332	SRR1185144	SRX482566	RNA-Seq	cDNA	TRANSCRIPTOMIC	PAIRED	11.92	100	ILLUMINA	Illumina HiSeq 2000	https://sra-download.ncbi.nlm.nih.gov/traces/sra17/SRR/001157/SRR1185144	ftp://ftp.sra.ebi.ac.uk/vol1/fastq/SRR118/004/SRR1185144/SRR1185144_1.fastq.gz	ftp://ftp.sra.ebi.ac.uk/vol1/fastq/SRR118/004/SRR1185144/SRR1185144_2.fastq.gz	source_name: Liver || tissue: liver || strain: Yorkshire-Landrace || fed status: Fasted || survival: Lived || time point: 8 hours after resuscitation began || tissue: liver biopsy	liver	Yorkshire-Landrace	unknown	unknown
107	SRS567084	Sus scrofa	PRJNA240332	SRR1185145	SRX482567	RNA-Seq	cDNA	TRANSCRIPTOMIC	PAIRED	10.02	100	ILLUMINA	Illumina HiSeq 2000	https://sra-download.ncbi.nlm.nih.gov/traces/sra17/SRR/001157/SRR1185145	ftp://ftp.sra.ebi.ac.uk/vol1/fastq/SRR118/005/SRR1185145/SRR1185145_1.fastq.gz	ftp://ftp.sra.ebi.ac.uk/vol1/fastq/SRR118/005/SRR1185145/SRR1185145_2.fastq.gz	source_name: Liver || tissue: liver || strain: Yorkshire-Landrace || fed status: Fasted || survival: Lived || time point: 20 hours after resuscitation began || tissue: liver biopsy	liver	Yorkshire-Landrace	unknown	unknown
108	SRS567085	Sus scrofa	PRJNA240332	SRR1185146	SRX482568	RNA-Seq	cDNA	TRANSCRIPTOMIC	PAIRED	14.9	100	ILLUMINA	Illumina HiSeq 2000	https://sra-download.ncbi.nlm.nih.gov/traces/sra17/SRR/001157/SRR1185146	ftp://ftp.sra.ebi.ac.uk/vol1/fastq/SRR118/006/SRR1185146/SRR1185146_1.fastq.gz	ftp://ftp.sra.ebi.ac.uk/vol1/fastq/SRR118/006/SRR1185146/SRR1185146_2.fastq.gz	source_name: Liver || tissue: liver || strain: Yorkshire-Landrace || fed status: Fasted || survival: Lived || time point: Baseline || tissue: liver biopsy	liver	Yorkshire-Landrace	unknown	unknown
109	SRS567087	Sus scrofa	PRJNA240332	SRR1185148	SRX482570	RNA-Seq	cDNA	TRANSCRIPTOMIC	PAIRED	11.68	100	ILLUMINA	Illumina HiSeq 2000	https://sra-download.ncbi.nlm.nih.gov/traces/sra17/SRR/001157/SRR1185148	ftp://ftp.sra.ebi.ac.uk/vol1/fastq/SRR118/008/SRR1185148/SRR1185148_1.fastq.gz	ftp://ftp.sra.ebi.ac.uk/vol1/fastq/SRR118/008/SRR1185148/SRR1185148_2.fastq.gz	source_name: Liver || tissue: liver || strain: Yorkshire-Landrace || fed status: Carbohydrate Prefed || survival: Died || time point: 8 hours after resuscitation began || tissue: liver biopsy	liver	Yorkshire-Landrace	unknown	unknown
110	SRS567088	Sus scrofa	PRJNA240332	SRR1185149	SRX482571	RNA-Seq	cDNA	TRANSCRIPTOMIC	PAIRED	10.47	100	ILLUMINA	Illumina HiSeq 2000	https://sra-download.ncbi.nlm.nih.gov/traces/sra17/SRR/001157/SRR1185149	ftp://ftp.sra.ebi.ac.uk/vol1/fastq/SRR118/009/SRR1185149/SRR1185149_1.fastq.gz	ftp://ftp.sra.ebi.ac.uk/vol1/fastq/SRR118/009/SRR1185149/SRR1185149_2.fastq.gz	source_name: Liver || tissue: liver || strain: Yorkshire-Landrace || fed status: Carbohydrate Prefed || survival: Died || time point: 20 hours after resuscitation began || tissue: liver biopsy	liver	Yorkshire-Landrace	unknown	unknown
111	SRS567089	Sus scrofa	PRJNA240332	SRR1185150	SRX482572	RNA-Seq	cDNA	TRANSCRIPTOMIC	PAIRED	11.56	100	ILLUMINA	Illumina HiSeq 2000	https://sra-download.ncbi.nlm.nih.gov/traces/sra17/SRR/001157/SRR1185150	ftp://ftp.sra.ebi.ac.uk/vol1/fastq/SRR118/000/SRR1185150/SRR1185150_1.fastq.gz	ftp://ftp.sra.ebi.ac.uk/vol1/fastq/SRR118/000/SRR1185150/SRR1185150_2.fastq.gz	source_name: Liver || tissue: liver || strain: Yorkshire-Landrace || fed status: Carbohydrate Prefed || survival: Died || time point: Baseline || tissue: liver biopsy	liver	Yorkshire-Landrace	unknown	unknown
112	SRS567091	Sus scrofa	PRJNA240332	SRR1185152	SRX482574	RNA-Seq	cDNA	TRANSCRIPTOMIC	PAIRED	10.66	100	ILLUMINA	Illumina HiSeq 2000	https://sra-download.ncbi.nlm.nih.gov/traces/sra17/SRR/001157/SRR1185152	ftp://ftp.sra.ebi.ac.uk/vol1/fastq/SRR118/002/SRR1185152/SRR1185152_1.fastq.gz	ftp://ftp.sra.ebi.ac.uk/vol1/fastq/SRR118/002/SRR1185152/SRR1185152_2.fastq.gz	source_name: Liver || tissue: liver || strain: Yorkshire-Landrace || fed status: Carbohydrate Prefed || survival: Died || time point: 8 hours after resuscitation began || tissue: liver biopsy	liver	Yorkshire-Landrace	unknown	unknown
113	SRS567092	Sus scrofa	PRJNA240332	SRR1185153	SRX482575	RNA-Seq	cDNA	TRANSCRIPTOMIC	PAIRED	10.03	100	ILLUMINA	Illumina HiSeq 2000	https://sra-download.ncbi.nlm.nih.gov/traces/sra17/SRR/001157/SRR1185153	ftp://ftp.sra.ebi.ac.uk/vol1/fastq/SRR118/003/SRR1185153/SRR1185153_1.fastq.gz	ftp://ftp.sra.ebi.ac.uk/vol1/fastq/SRR118/003/SRR1185153/SRR1185153_2.fastq.gz	source_name: Liver || tissue: liver || strain: Yorkshire-Landrace || fed status: Carbohydrate Prefed || survival: Died || time point: 20 hours after resuscitation began || tissue: liver biopsy	liver	Yorkshire-Landrace	unknown	unknown
114	SRS567093	Sus scrofa	PRJNA240332	SRR1185154	SRX482576	RNA-Seq	cDNA	TRANSCRIPTOMIC	PAIRED	10.19	100	ILLUMINA	Illumina HiSeq 2000	https://sra-download.ncbi.nlm.nih.gov/traces/sra17/SRR/001157/SRR1185154	ftp://ftp.sra.ebi.ac.uk/vol1/fastq/SRR118/004/SRR1185154/SRR1185154_1.fastq.gz	ftp://ftp.sra.ebi.ac.uk/vol1/fastq/SRR118/004/SRR1185154/SRR1185154_2.fastq.gz	source_name: Liver || tissue: liver || strain: Yorkshire-Landrace || fed status: Carbohydrate Prefed || survival: Died || time point: Baseline || tissue: liver biopsy	liver	Yorkshire-Landrace	unknown	unknown
115	SRS567094	Sus scrofa	PRJNA240332	SRR1185155	SRX482577	RNA-Seq	cDNA	TRANSCRIPTOMIC	PAIRED	12.48	100	ILLUMINA	Illumina HiSeq 2000	https://sra-download.ncbi.nlm.nih.gov/traces/sra17/SRR/001157/SRR1185155	ftp://ftp.sra.ebi.ac.uk/vol1/fastq/SRR118/005/SRR1185155/SRR1185155_1.fastq.gz	ftp://ftp.sra.ebi.ac.uk/vol1/fastq/SRR118/005/SRR1185155/SRR1185155_2.fastq.gz	source_name: Liver || tissue: liver || strain: Yorkshire-Landrace || fed status: Fasted || survival: Lived || time point: 2 hours after resuscitation began || tissue: liver biopsy	liver	Yorkshire-Landrace	unknown	unknown
116	SRS567095	Sus scrofa	PRJNA240332	SRR1185156	SRX482578	RNA-Seq	cDNA	TRANSCRIPTOMIC	PAIRED	14.68	100	ILLUMINA	Illumina HiSeq 2000	https://sra-download.ncbi.nlm.nih.gov/traces/sra17/SRR/001157/SRR1185156	ftp://ftp.sra.ebi.ac.uk/vol1/fastq/SRR118/006/SRR1185156/SRR1185156_1.fastq.gz	ftp://ftp.sra.ebi.ac.uk/vol1/fastq/SRR118/006/SRR1185156/SRR1185156_2.fastq.gz	source_name: Liver || tissue: liver || strain: Yorkshire-Landrace || fed status: Fasted || survival: Lived || time point: 8 hours after resuscitation began || tissue: liver biopsy	liver	Yorkshire-Landrace	unknown	unknown
117	SRS567096	Sus scrofa	PRJNA240332	SRR1185157	SRX482579	RNA-Seq	cDNA	TRANSCRIPTOMIC	PAIRED	12.87	100	ILLUMINA	Illumina HiSeq 2000	https://sra-download.ncbi.nlm.nih.gov/traces/sra17/SRR/001157/SRR1185157	ftp://ftp.sra.ebi.ac.uk/vol1/fastq/SRR118/007/SRR1185157/SRR1185157_1.fastq.gz	ftp://ftp.sra.ebi.ac.uk/vol1/fastq/SRR118/007/SRR1185157/SRR1185157_2.fastq.gz	source_name: Liver || tissue: liver || strain: Yorkshire-Landrace || fed status: Fasted || survival: Lived || time point: 20 hours after resuscitation began || tissue: liver biopsy	liver	Yorkshire-Landrace	unknown	unknown
118	SRS567097	Sus scrofa	PRJNA240332	SRR1185158	SRX482580	RNA-Seq	cDNA	TRANSCRIPTOMIC	PAIRED	12.68	100	ILLUMINA	Illumina HiSeq 2000	https://sra-download.ncbi.nlm.nih.gov/traces/sra17/SRR/001157/SRR1185158	ftp://ftp.sra.ebi.ac.uk/vol1/fastq/SRR118/008/SRR1185158/SRR1185158_1.fastq.gz	ftp://ftp.sra.ebi.ac.uk/vol1/fastq/SRR118/008/SRR1185158/SRR1185158_2.fastq.gz	source_name: Liver || tissue: liver || strain: Yorkshire-Landrace || fed status: Fasted || survival: Lived || time point: Baseline || tissue: liver biopsy	liver	Yorkshire-Landrace	unknown	unknown
119	SRS567098	Sus scrofa	PRJNA240332	SRR1185159	SRX482581	RNA-Seq	cDNA	TRANSCRIPTOMIC	PAIRED	14.19	100	ILLUMINA	Illumina HiSeq 2000	https://sra-download.ncbi.nlm.nih.gov/traces/sra17/SRR/001157/SRR1185159	ftp://ftp.sra.ebi.ac.uk/vol1/fastq/SRR118/009/SRR1185159/SRR1185159_1.fastq.gz	ftp://ftp.sra.ebi.ac.uk/vol1/fastq/SRR118/009/SRR1185159/SRR1185159_2.fastq.gz	source_name: Liver || tissue: liver || strain: Yorkshire-Landrace || fed status: Fasted || survival: Lived || time point: 2 hours after resuscitation began || tissue: liver biopsy	liver	Yorkshire-Landrace	unknown	unknown
120	SRS567099	Sus scrofa	PRJNA240332	SRR1185160	SRX482582	RNA-Seq	cDNA	TRANSCRIPTOMIC	PAIRED	13.41	100	ILLUMINA	Illumina HiSeq 2000	https://sra-download.ncbi.nlm.nih.gov/traces/sra17/SRR/001157/SRR1185160	ftp://ftp.sra.ebi.ac.uk/vol1/fastq/SRR118/000/SRR1185160/SRR1185160_1.fastq.gz	ftp://ftp.sra.ebi.ac.uk/vol1/fastq/SRR118/000/SRR1185160/SRR1185160_2.fastq.gz	source_name: Liver || tissue: liver || strain: Yorkshire-Landrace || fed status: Fasted || survival: Lived || time point: 8 hours after resuscitation began || tissue: liver biopsy	liver	Yorkshire-Landrace	unknown	unknown
121	SRS567100	Sus scrofa	PRJNA240332	SRR1185161	SRX482583	RNA-Seq	cDNA	TRANSCRIPTOMIC	PAIRED	14.41	100	ILLUMINA	Illumina HiSeq 2000	https://sra-download.ncbi.nlm.nih.gov/traces/sra17/SRR/001157/SRR1185161	ftp://ftp.sra.ebi.ac.uk/vol1/fastq/SRR118/001/SRR1185161/SRR1185161_1.fastq.gz	ftp://ftp.sra.ebi.ac.uk/vol1/fastq/SRR118/001/SRR1185161/SRR1185161_2.fastq.gz	source_name: Liver || tissue: liver || strain: Yorkshire-Landrace || fed status: Fasted || survival: Lived || time point: 20 hours after resuscitation began || tissue: liver biopsy	liver	Yorkshire-Landrace	unknown	unknown
122	SRS567101	Sus scrofa	PRJNA240332	SRR1185162	SRX482584	RNA-Seq	cDNA	TRANSCRIPTOMIC	PAIRED	11.14	100	ILLUMINA	Illumina HiSeq 2000	https://sra-download.ncbi.nlm.nih.gov/traces/sra17/SRR/001157/SRR1185162	ftp://ftp.sra.ebi.ac.uk/vol1/fastq/SRR118/002/SRR1185162/SRR1185162_1.fastq.gz	ftp://ftp.sra.ebi.ac.uk/vol1/fastq/SRR118/002/SRR1185162/SRR1185162_2.fastq.gz	source_name: Liver || tissue: liver || strain: Yorkshire-Landrace || fed status: Fasted || survival: Lived || time point: Baseline || tissue: liver biopsy	liver	Yorkshire-Landrace	unknown	unknown
123	SRS567102	Sus scrofa	PRJNA240332	SRR1185163	SRX482585	RNA-Seq	cDNA	TRANSCRIPTOMIC	PAIRED	12.37	100	ILLUMINA	Illumina HiSeq 2000	https://sra-download.ncbi.nlm.nih.gov/traces/sra17/SRR/001157/SRR1185163	ftp://ftp.sra.ebi.ac.uk/vol1/fastq/SRR118/003/SRR1185163/SRR1185163_1.fastq.gz	ftp://ftp.sra.ebi.ac.uk/vol1/fastq/SRR118/003/SRR1185163/SRR1185163_2.fastq.gz	source_name: Liver || tissue: liver || strain: Yorkshire-Landrace || fed status: Fasted || survival: Lived || time point: 2 hours after resuscitation began || tissue: liver biopsy	liver	Yorkshire-Landrace	unknown	unknown
124	SRS567103	Sus scrofa	PRJNA240332	SRR1185164	SRX482586	RNA-Seq	cDNA	TRANSCRIPTOMIC	PAIRED	11.63	100	ILLUMINA	Illumina HiSeq 2000	https://sra-download.ncbi.nlm.nih.gov/traces/sra17/SRR/001157/SRR1185164	ftp://ftp.sra.ebi.ac.uk/vol1/fastq/SRR118/004/SRR1185164/SRR1185164_1.fastq.gz	ftp://ftp.sra.ebi.ac.uk/vol1/fastq/SRR118/004/SRR1185164/SRR1185164_2.fastq.gz	source_name: Liver || tissue: liver || strain: Yorkshire-Landrace || fed status: Fasted || survival: Lived || time point: 8 hours after resuscitation began || tissue: liver biopsy	liver	Yorkshire-Landrace	unknown	unknown
125	SRS567104	Sus scrofa	PRJNA240332	SRR1185165	SRX482587	RNA-Seq	cDNA	TRANSCRIPTOMIC	PAIRED	11.1	100	ILLUMINA	Illumina HiSeq 2000	https://sra-download.ncbi.nlm.nih.gov/traces/sra17/SRR/001157/SRR1185165	ftp://ftp.sra.ebi.ac.uk/vol1/fastq/SRR118/005/SRR1185165/SRR1185165_1.fastq.gz	ftp://ftp.sra.ebi.ac.uk/vol1/fastq/SRR118/005/SRR1185165/SRR1185165_2.fastq.gz	source_name: Liver || tissue: liver || strain: Yorkshire-Landrace || fed status: Fasted || survival: Lived || time point: 20 hours after resuscitation began || tissue: liver biopsy	liver	Yorkshire-Landrace	unknown	unknown
126	SRS567105	Sus scrofa	PRJNA240332	SRR1185166	SRX482588	RNA-Seq	cDNA	TRANSCRIPTOMIC	PAIRED	12.92	100	ILLUMINA	Illumina HiSeq 2000	https://sra-download.ncbi.nlm.nih.gov/traces/sra17/SRR/001157/SRR1185166	ftp://ftp.sra.ebi.ac.uk/vol1/fastq/SRR118/006/SRR1185166/SRR1185166_1.fastq.gz	ftp://ftp.sra.ebi.ac.uk/vol1/fastq/SRR118/006/SRR1185166/SRR1185166_2.fastq.gz	source_name: Liver || tissue: liver || strain: Yorkshire-Landrace || fed status: Fasted || survival: Lived || time point: Baseline || tissue: liver biopsy	liver	Yorkshire-Landrace	unknown	unknown
127	SRS567106	Sus scrofa	PRJNA240332	SRR1185167	SRX482589	RNA-Seq	cDNA	TRANSCRIPTOMIC	PAIRED	11.01	100	ILLUMINA	Illumina HiSeq 2000	https://sra-download.ncbi.nlm.nih.gov/traces/sra17/SRR/001157/SRR1185167	ftp://ftp.sra.ebi.ac.uk/vol1/fastq/SRR118/007/SRR1185167/SRR1185167_1.fastq.gz	ftp://ftp.sra.ebi.ac.uk/vol1/fastq/SRR118/007/SRR1185167/SRR1185167_2.fastq.gz	source_name: Liver || tissue: liver || strain: Yorkshire-Landrace || fed status: Fasted || survival: Lived || time point: 2 hours after resuscitation began || tissue: liver biopsy	liver	Yorkshire-Landrace	unknown	unknown
128	SRS567107	Sus scrofa	PRJNA240332	SRR1185168	SRX482590	RNA-Seq	cDNA	TRANSCRIPTOMIC	PAIRED	13.71	100	ILLUMINA	Illumina HiSeq 2000	https://sra-download.ncbi.nlm.nih.gov/traces/sra17/SRR/001157/SRR1185168	ftp://ftp.sra.ebi.ac.uk/vol1/fastq/SRR118/008/SRR1185168/SRR1185168_1.fastq.gz	ftp://ftp.sra.ebi.ac.uk/vol1/fastq/SRR118/008/SRR1185168/SRR1185168_2.fastq.gz	source_name: Liver || tissue: liver || strain: Yorkshire-Landrace || fed status: Fasted || survival: Lived || time point: 8 hours after resuscitation began || tissue: liver biopsy	liver	Yorkshire-Landrace	unknown	unknown
129	SRS567108	Sus scrofa	PRJNA240332	SRR1185169	SRX482591	RNA-Seq	cDNA	TRANSCRIPTOMIC	PAIRED	12.93	100	ILLUMINA	Illumina HiSeq 2000	https://sra-download.ncbi.nlm.nih.gov/traces/sra17/SRR/001157/SRR1185169	ftp://ftp.sra.ebi.ac.uk/vol1/fastq/SRR118/009/SRR1185169/SRR1185169_1.fastq.gz	ftp://ftp.sra.ebi.ac.uk/vol1/fastq/SRR118/009/SRR1185169/SRR1185169_2.fastq.gz	source_name: Liver || tissue: liver || strain: Yorkshire-Landrace || fed status: Fasted || survival: Lived || time point: 20 hours after resuscitation began || tissue: liver biopsy	liver	Yorkshire-Landrace	unknown	unknown
130	SRS567109	Sus scrofa	PRJNA240332	SRR1185170	SRX482592	RNA-Seq	cDNA	TRANSCRIPTOMIC	PAIRED	11.29	100	ILLUMINA	Illumina HiSeq 2000	https://sra-download.ncbi.nlm.nih.gov/traces/sra17/SRR/001157/SRR1185170	ftp://ftp.sra.ebi.ac.uk/vol1/fastq/SRR118/000/SRR1185170/SRR1185170_1.fastq.gz	ftp://ftp.sra.ebi.ac.uk/vol1/fastq/SRR118/000/SRR1185170/SRR1185170_2.fastq.gz	source_name: Liver || tissue: liver || strain: Yorkshire-Landrace || fed status: Fasted || survival: Lived || time point: Baseline || tissue: liver biopsy	liver	Yorkshire-Landrace	unknown	unknown
131	SRS567110	Sus scrofa	PRJNA240332	SRR1185171	SRX482593	RNA-Seq	cDNA	TRANSCRIPTOMIC	PAIRED	11.28	100	ILLUMINA	Illumina HiSeq 2000	https://sra-download.ncbi.nlm.nih.gov/traces/sra17/SRR/001157/SRR1185171	ftp://ftp.sra.ebi.ac.uk/vol1/fastq/SRR118/001/SRR1185171/SRR1185171_1.fastq.gz	ftp://ftp.sra.ebi.ac.uk/vol1/fastq/SRR118/001/SRR1185171/SRR1185171_2.fastq.gz	source_name: Liver || tissue: liver || strain: Yorkshire-Landrace || fed status: Carbohydrate Prefed || survival: Lived || time point: 2 hours after resuscitation began || tissue: liver biopsy	liver	Yorkshire-Landrace	unknown	unknown
132	SRS567111	Sus scrofa	PRJNA240332	SRR1185172	SRX482594	RNA-Seq	cDNA	TRANSCRIPTOMIC	PAIRED	10.39	100	ILLUMINA	Illumina HiSeq 2000	https://sra-download.ncbi.nlm.nih.gov/traces/sra17/SRR/001157/SRR1185172	ftp://ftp.sra.ebi.ac.uk/vol1/fastq/SRR118/002/SRR1185172/SRR1185172_1.fastq.gz	ftp://ftp.sra.ebi.ac.uk/vol1/fastq/SRR118/002/SRR1185172/SRR1185172_2.fastq.gz	source_name: Liver || tissue: liver || strain: Yorkshire-Landrace || fed status: Carbohydrate Prefed || survival: Lived || time point: 8 hours after resuscitation began || tissue: liver biopsy	liver	Yorkshire-Landrace	unknown	unknown
133	SRS567112	Sus scrofa	PRJNA240332	SRR1185173	SRX482595	RNA-Seq	cDNA	TRANSCRIPTOMIC	PAIRED	11.07	100	ILLUMINA	Illumina HiSeq 2000	https://sra-download.ncbi.nlm.nih.gov/traces/sra17/SRR/001157/SRR1185173	ftp://ftp.sra.ebi.ac.uk/vol1/fastq/SRR118/003/SRR1185173/SRR1185173_1.fastq.gz	ftp://ftp.sra.ebi.ac.uk/vol1/fastq/SRR118/003/SRR1185173/SRR1185173_2.fastq.gz	source_name: Liver || tissue: liver || strain: Yorkshire-Landrace || fed status: Carbohydrate Prefed || survival: Lived || time point: 20 hours after resuscitation began || tissue: liver biopsy	liver	Yorkshire-Landrace	unknown	unknown
134	SRS567114	Sus scrofa	PRJNA240332	SRR1185175	SRX482597	RNA-Seq	cDNA	TRANSCRIPTOMIC	PAIRED	10.38	100	ILLUMINA	Illumina HiSeq 2000	https://sra-download.ncbi.nlm.nih.gov/traces/sra17/SRR/001157/SRR1185175	ftp://ftp.sra.ebi.ac.uk/vol1/fastq/SRR118/005/SRR1185175/SRR1185175_1.fastq.gz	ftp://ftp.sra.ebi.ac.uk/vol1/fastq/SRR118/005/SRR1185175/SRR1185175_2.fastq.gz	source_name: Liver || tissue: liver || strain: Yorkshire-Landrace || fed status: Fasted || survival: Lived || time point: 2 hours after resuscitation began || tissue: liver biopsy	liver	Yorkshire-Landrace	unknown	unknown
135	SRS567115	Sus scrofa	PRJNA240332	SRR1185176	SRX482598	RNA-Seq	cDNA	TRANSCRIPTOMIC	PAIRED	13.74	100	ILLUMINA	Illumina HiSeq 2000	https://sra-download.ncbi.nlm.nih.gov/traces/sra17/SRR/001157/SRR1185176	ftp://ftp.sra.ebi.ac.uk/vol1/fastq/SRR118/006/SRR1185176/SRR1185176_1.fastq.gz	ftp://ftp.sra.ebi.ac.uk/vol1/fastq/SRR118/006/SRR1185176/SRR1185176_2.fastq.gz	source_name: Liver || tissue: liver || strain: Yorkshire-Landrace || fed status: Fasted || survival: Lived || time point: 8 hours after resuscitation began || tissue: liver biopsy	liver	Yorkshire-Landrace	unknown	unknown
136	SRS567116	Sus scrofa	PRJNA240332	SRR1185177	SRX482599	RNA-Seq	cDNA	TRANSCRIPTOMIC	PAIRED	12.12	100	ILLUMINA	Illumina HiSeq 2000	https://sra-download.ncbi.nlm.nih.gov/traces/sra17/SRR/001157/SRR1185177	ftp://ftp.sra.ebi.ac.uk/vol1/fastq/SRR118/007/SRR1185177/SRR1185177_1.fastq.gz	ftp://ftp.sra.ebi.ac.uk/vol1/fastq/SRR118/007/SRR1185177/SRR1185177_2.fastq.gz	source_name: Liver || tissue: liver || strain: Yorkshire-Landrace || fed status: Fasted || survival: Lived || time point: 20 hours after resuscitation began || tissue: liver biopsy	liver	Yorkshire-Landrace	unknown	unknown
137	SRS567118	Sus scrofa	PRJNA240332	SRR1185179	SRX482601	RNA-Seq	cDNA	TRANSCRIPTOMIC	PAIRED	12.22	100	ILLUMINA	Illumina HiSeq 2000	https://sra-download.ncbi.nlm.nih.gov/traces/sra17/SRR/001157/SRR1185179	ftp://ftp.sra.ebi.ac.uk/vol1/fastq/SRR118/009/SRR1185179/SRR1185179_1.fastq.gz	ftp://ftp.sra.ebi.ac.uk/vol1/fastq/SRR118/009/SRR1185179/SRR1185179_2.fastq.gz	source_name: Liver || tissue: liver || strain: Yorkshire-Landrace || fed status: Fasted || survival: Lived || time point: 2 hours after resuscitation began || tissue: liver biopsy	liver	Yorkshire-Landrace	unknown	unknown
138	SRS567119	Sus scrofa	PRJNA240332	SRR1185181	SRX482603	RNA-Seq	cDNA	TRANSCRIPTOMIC	PAIRED	12.61	100	ILLUMINA	Illumina HiSeq 2000	https://sra-download.ncbi.nlm.nih.gov/traces/sra17/SRR/001157/SRR1185181	ftp://ftp.sra.ebi.ac.uk/vol1/fastq/SRR118/001/SRR1185181/SRR1185181_1.fastq.gz	ftp://ftp.sra.ebi.ac.uk/vol1/fastq/SRR118/001/SRR1185181/SRR1185181_2.fastq.gz	source_name: Liver || tissue: liver || strain: Yorkshire-Landrace || fed status: Fasted || survival: Lived || time point: 20 hours after resuscitation began || tissue: liver biopsy	liver	Yorkshire-Landrace	unknown	unknown
139	SRS567120	Sus scrofa	PRJNA240332	SRR1185180	SRX482602	RNA-Seq	cDNA	TRANSCRIPTOMIC	PAIRED	11.26	100	ILLUMINA	Illumina HiSeq 2000	https://sra-download.ncbi.nlm.nih.gov/traces/sra17/SRR/001157/SRR1185180	ftp://ftp.sra.ebi.ac.uk/vol1/fastq/SRR118/000/SRR1185180/SRR1185180_1.fastq.gz	ftp://ftp.sra.ebi.ac.uk/vol1/fastq/SRR118/000/SRR1185180/SRR1185180_2.fastq.gz	source_name: Liver || tissue: liver || strain: Yorkshire-Landrace || fed status: Fasted || survival: Lived || time point: 8 hours after resuscitation began || tissue: liver biopsy	liver	Yorkshire-Landrace	unknown	unknown
140	SRS567121	Sus scrofa	PRJNA240332	SRR1185182	SRX482604	RNA-Seq	cDNA	TRANSCRIPTOMIC	PAIRED	12.09	100	ILLUMINA	Illumina HiSeq 2000	https://sra-download.ncbi.nlm.nih.gov/traces/sra17/SRR/001157/SRR1185182	ftp://ftp.sra.ebi.ac.uk/vol1/fastq/SRR118/002/SRR1185182/SRR1185182_1.fastq.gz	ftp://ftp.sra.ebi.ac.uk/vol1/fastq/SRR118/002/SRR1185182/SRR1185182_2.fastq.gz	source_name: Liver || tissue: liver || strain: Yorkshire-Landrace || fed status: Fasted || survival: Lived || time point: Baseline || tissue: liver biopsy	liver	Yorkshire-Landrace	unknown	unknown
141	SRS567122	Sus scrofa	PRJNA240332	SRR1185183	SRX482605	RNA-Seq	cDNA	TRANSCRIPTOMIC	PAIRED	10	100	ILLUMINA	Illumina HiSeq 2000	https://sra-download.ncbi.nlm.nih.gov/traces/sra17/SRR/001157/SRR1185183	ftp://ftp.sra.ebi.ac.uk/vol1/fastq/SRR118/003/SRR1185183/SRR1185183_1.fastq.gz	ftp://ftp.sra.ebi.ac.uk/vol1/fastq/SRR118/003/SRR1185183/SRR1185183_2.fastq.gz	source_name: Liver || tissue: liver || strain: Yorkshire-Landrace || fed status: Fasted || survival: Died || time point: 2 hours after resuscitation began || tissue: liver biopsy	liver	Yorkshire-Landrace	unknown	unknown
142	SRS567123	Sus scrofa	PRJNA240332	SRR1185185	SRX482607	RNA-Seq	cDNA	TRANSCRIPTOMIC	PAIRED	12.23	100	ILLUMINA	Illumina HiSeq 2000	https://sra-download.ncbi.nlm.nih.gov/traces/sra17/SRR/001157/SRR1185185	ftp://ftp.sra.ebi.ac.uk/vol1/fastq/SRR118/005/SRR1185185/SRR1185185_1.fastq.gz	ftp://ftp.sra.ebi.ac.uk/vol1/fastq/SRR118/005/SRR1185185/SRR1185185_2.fastq.gz	source_name: Liver || tissue: liver || strain: Yorkshire-Landrace || fed status: Fasted || survival: Died || time point: 20 hours after resuscitation began || tissue: liver biopsy	liver	Yorkshire-Landrace	unknown	unknown
143	SRS567124	Sus scrofa	PRJNA240332	SRR1185184	SRX482606	RNA-Seq	cDNA	TRANSCRIPTOMIC	PAIRED	10.24	100	ILLUMINA	Illumina HiSeq 2000	https://sra-download.ncbi.nlm.nih.gov/traces/sra17/SRR/001157/SRR1185184	ftp://ftp.sra.ebi.ac.uk/vol1/fastq/SRR118/004/SRR1185184/SRR1185184_1.fastq.gz	ftp://ftp.sra.ebi.ac.uk/vol1/fastq/SRR118/004/SRR1185184/SRR1185184_2.fastq.gz	source_name: Liver || tissue: liver || strain: Yorkshire-Landrace || fed status: Fasted || survival: Died || time point: 8 hours after resuscitation began || tissue: liver biopsy	liver	Yorkshire-Landrace	unknown	unknown
144	SRS567125	Sus scrofa	PRJNA240332	SRR1185186	SRX482608	RNA-Seq	cDNA	TRANSCRIPTOMIC	PAIRED	10.91	100	ILLUMINA	Illumina HiSeq 2000	https://sra-download.ncbi.nlm.nih.gov/traces/sra17/SRR/001157/SRR1185186	ftp://ftp.sra.ebi.ac.uk/vol1/fastq/SRR118/006/SRR1185186/SRR1185186_1.fastq.gz	ftp://ftp.sra.ebi.ac.uk/vol1/fastq/SRR118/006/SRR1185186/SRR1185186_2.fastq.gz	source_name: Liver || tissue: liver || strain: Yorkshire-Landrace || fed status: Fasted || survival: Died || time point: Baseline || tissue: liver biopsy	liver	Yorkshire-Landrace	unknown	unknown
145	SRS567126	Sus scrofa	PRJNA240332	SRR1185187	SRX482609	RNA-Seq	cDNA	TRANSCRIPTOMIC	PAIRED	12.07	100	ILLUMINA	Illumina HiSeq 2000	https://sra-download.ncbi.nlm.nih.gov/traces/sra17/SRR/001157/SRR1185187	ftp://ftp.sra.ebi.ac.uk/vol1/fastq/SRR118/007/SRR1185187/SRR1185187_1.fastq.gz	ftp://ftp.sra.ebi.ac.uk/vol1/fastq/SRR118/007/SRR1185187/SRR1185187_2.fastq.gz	source_name: Liver || tissue: liver || strain: Yorkshire-Landrace || fed status: Fasted || survival: Lived || time point: 2 hours after resuscitation began || tissue: liver biopsy	liver	Yorkshire-Landrace	unknown	unknown
146	SRS567127	Sus scrofa	PRJNA240332	SRR1185188	SRX482610	RNA-Seq	cDNA	TRANSCRIPTOMIC	PAIRED	14.48	100	ILLUMINA	Illumina HiSeq 2000	https://sra-download.ncbi.nlm.nih.gov/traces/sra17/SRR/001157/SRR1185188	ftp://ftp.sra.ebi.ac.uk/vol1/fastq/SRR118/008/SRR1185188/SRR1185188_1.fastq.gz	ftp://ftp.sra.ebi.ac.uk/vol1/fastq/SRR118/008/SRR1185188/SRR1185188_2.fastq.gz	source_name: Liver || tissue: liver || strain: Yorkshire-Landrace || fed status: Fasted || survival: Lived || time point: 8 hours after resuscitation began || tissue: liver biopsy	liver	Yorkshire-Landrace	unknown	unknown
147	SRS567128	Sus scrofa	PRJNA240332	SRR1185189	SRX482611	RNA-Seq	cDNA	TRANSCRIPTOMIC	PAIRED	20.61	100	ILLUMINA	Illumina HiSeq 2000	https://sra-download.ncbi.nlm.nih.gov/traces/sra17/SRR/001157/SRR1185189	ftp://ftp.sra.ebi.ac.uk/vol1/fastq/SRR118/009/SRR1185189/SRR1185189_1.fastq.gz	ftp://ftp.sra.ebi.ac.uk/vol1/fastq/SRR118/009/SRR1185189/SRR1185189_2.fastq.gz	source_name: Liver || tissue: liver || strain: Yorkshire-Landrace || fed status: Fasted || survival: Lived || time point: 20 hours after resuscitation began || tissue: liver biopsy	liver	Yorkshire-Landrace	unknown	unknown
148	SRS567129	Sus scrofa	PRJNA240332	SRR1185190	SRX482612	RNA-Seq	cDNA	TRANSCRIPTOMIC	PAIRED	13.19	100	ILLUMINA	Illumina HiSeq 2000	https://sra-download.ncbi.nlm.nih.gov/traces/sra17/SRR/001157/SRR1185190	ftp://ftp.sra.ebi.ac.uk/vol1/fastq/SRR118/000/SRR1185190/SRR1185190_1.fastq.gz	ftp://ftp.sra.ebi.ac.uk/vol1/fastq/SRR118/000/SRR1185190/SRR1185190_2.fastq.gz	source_name: Liver || tissue: liver || strain: Yorkshire-Landrace || fed status: Fasted || survival: Lived || time point: Baseline || tissue: liver biopsy	liver	Yorkshire-Landrace	unknown	unknown
149	SRS567131	Sus scrofa	PRJNA240332	SRR1185193	SRX482615	RNA-Seq	cDNA	TRANSCRIPTOMIC	PAIRED	11.55	100	ILLUMINA	Illumina HiSeq 2000	https://sra-download.ncbi.nlm.nih.gov/traces/sra17/SRR/001157/SRR1185193	ftp://ftp.sra.ebi.ac.uk/vol1/fastq/SRR118/003/SRR1185193/SRR1185193_1.fastq.gz	ftp://ftp.sra.ebi.ac.uk/vol1/fastq/SRR118/003/SRR1185193/SRR1185193_2.fastq.gz	source_name: Liver || tissue: liver || strain: Yorkshire-Landrace || fed status: Carbohydrate Prefed || survival: Lived || time point: 20 hours after resuscitation began || tissue: liver biopsy	liver	Yorkshire-Landrace	unknown	unknown
150	SRS567134	Sus scrofa	PRJNA240332	SRR1185195	SRX482617	RNA-Seq	cDNA	TRANSCRIPTOMIC	PAIRED	14.71	100	ILLUMINA	Illumina HiSeq 2000	https://sra-download.ncbi.nlm.nih.gov/traces/sra17/SRR/001157/SRR1185195	ftp://ftp.sra.ebi.ac.uk/vol1/fastq/SRR118/005/SRR1185195/SRR1185195_1.fastq.gz	ftp://ftp.sra.ebi.ac.uk/vol1/fastq/SRR118/005/SRR1185195/SRR1185195_2.fastq.gz	source_name: Liver || tissue: liver || strain: Yorkshire-Landrace || fed status: Fasted || survival: Lived || time point: 2 hours after resuscitation began || tissue: liver biopsy	liver	Yorkshire-Landrace	unknown	unknown
151	SRS567135	Sus scrofa	PRJNA240332	SRR1185196	SRX482618	RNA-Seq	cDNA	TRANSCRIPTOMIC	PAIRED	13.85	100	ILLUMINA	Illumina HiSeq 2000	https://sra-download.ncbi.nlm.nih.gov/traces/sra17/SRR/001157/SRR1185196	ftp://ftp.sra.ebi.ac.uk/vol1/fastq/SRR118/006/SRR1185196/SRR1185196_1.fastq.gz	ftp://ftp.sra.ebi.ac.uk/vol1/fastq/SRR118/006/SRR1185196/SRR1185196_2.fastq.gz	source_name: Liver || tissue: liver || strain: Yorkshire-Landrace || fed status: Fasted || survival: Lived || time point: 8 hours after resuscitation began || tissue: liver biopsy	liver	Yorkshire-Landrace	unknown	unknown
152	SRS567136	Sus scrofa	PRJNA240332	SRR1185197	SRX482619	RNA-Seq	cDNA	TRANSCRIPTOMIC	PAIRED	14.69	100	ILLUMINA	Illumina HiSeq 2000	https://sra-download.ncbi.nlm.nih.gov/traces/sra17/SRR/001157/SRR1185197	ftp://ftp.sra.ebi.ac.uk/vol1/fastq/SRR118/007/SRR1185197/SRR1185197_1.fastq.gz	ftp://ftp.sra.ebi.ac.uk/vol1/fastq/SRR118/007/SRR1185197/SRR1185197_2.fastq.gz	source_name: Liver || tissue: liver || strain: Yorkshire-Landrace || fed status: Fasted || survival: Lived || time point: 20 hours after resuscitation began || tissue: liver biopsy	liver	Yorkshire-Landrace	unknown	unknown
153	SRS567137	Sus scrofa	PRJNA240332	SRR1185198	SRX482620	RNA-Seq	cDNA	TRANSCRIPTOMIC	PAIRED	12.55	100	ILLUMINA	Illumina HiSeq 2000	https://sra-download.ncbi.nlm.nih.gov/traces/sra17/SRR/001157/SRR1185198	ftp://ftp.sra.ebi.ac.uk/vol1/fastq/SRR118/008/SRR1185198/SRR1185198_1.fastq.gz	ftp://ftp.sra.ebi.ac.uk/vol1/fastq/SRR118/008/SRR1185198/SRR1185198_2.fastq.gz	source_name: Liver || tissue: liver || strain: Yorkshire-Landrace || fed status: Fasted || survival: Lived || time point: Baseline || tissue: liver biopsy	liver	Yorkshire-Landrace	unknown	unknown
154	SRS567138	Sus scrofa	PRJNA240332	SRR1185199	SRX482621	RNA-Seq	cDNA	TRANSCRIPTOMIC	PAIRED	11.16	100	ILLUMINA	Illumina HiSeq 2000	https://sra-download.ncbi.nlm.nih.gov/traces/sra17/SRR/001157/SRR1185199	ftp://ftp.sra.ebi.ac.uk/vol1/fastq/SRR118/009/SRR1185199/SRR1185199_1.fastq.gz	ftp://ftp.sra.ebi.ac.uk/vol1/fastq/SRR118/009/SRR1185199/SRR1185199_2.fastq.gz	source_name: Liver || tissue: liver || strain: Yorkshire-Landrace || fed status: Fasted || survival: Died || time point: 2 hours after resuscitation began || tissue: liver biopsy	liver	Yorkshire-Landrace	unknown	unknown
155	SRS567139	Sus scrofa	PRJNA240332	SRR1185200	SRX482622	RNA-Seq	cDNA	TRANSCRIPTOMIC	PAIRED	12.15	100	ILLUMINA	Illumina HiSeq 2000	https://sra-download.ncbi.nlm.nih.gov/traces/sra17/SRR/001157/SRR1185200	ftp://ftp.sra.ebi.ac.uk/vol1/fastq/SRR118/000/SRR1185200/SRR1185200_1.fastq.gz	ftp://ftp.sra.ebi.ac.uk/vol1/fastq/SRR118/000/SRR1185200/SRR1185200_2.fastq.gz	source_name: Liver || tissue: liver || strain: Yorkshire-Landrace || fed status: Fasted || survival: Died || time point: 8 hours after resuscitation began || tissue: liver biopsy	liver	Yorkshire-Landrace	unknown	unknown
156	SRS567140	Sus scrofa	PRJNA240332	SRR1185201	SRX482623	RNA-Seq	cDNA	TRANSCRIPTOMIC	PAIRED	11.51	100	ILLUMINA	Illumina HiSeq 2000	https://sra-download.ncbi.nlm.nih.gov/traces/sra17/SRR/001157/SRR1185201	ftp://ftp.sra.ebi.ac.uk/vol1/fastq/SRR118/001/SRR1185201/SRR1185201_1.fastq.gz	ftp://ftp.sra.ebi.ac.uk/vol1/fastq/SRR118/001/SRR1185201/SRR1185201_2.fastq.gz	source_name: Liver || tissue: liver || strain: Yorkshire-Landrace || fed status: Fasted || survival: Died || time point: 20 hours after resuscitation began || tissue: liver biopsy	liver	Yorkshire-Landrace	unknown	unknown
157	SRS567141	Sus scrofa	PRJNA240332	SRR1185202	SRX482624	RNA-Seq	cDNA	TRANSCRIPTOMIC	PAIRED	11.29	100	ILLUMINA	Illumina HiSeq 2000	https://sra-download.ncbi.nlm.nih.gov/traces/sra17/SRR/001157/SRR1185202	ftp://ftp.sra.ebi.ac.uk/vol1/fastq/SRR118/002/SRR1185202/SRR1185202_1.fastq.gz	ftp://ftp.sra.ebi.ac.uk/vol1/fastq/SRR118/002/SRR1185202/SRR1185202_2.fastq.gz	source_name: Liver || tissue: liver || strain: Yorkshire-Landrace || fed status: Fasted || survival: Died || time point: Baseline || tissue: liver biopsy	liver	Yorkshire-Landrace	unknown	unknown
158	SRS567142	Sus scrofa	PRJNA240332	SRR1185203	SRX482625	RNA-Seq	cDNA	TRANSCRIPTOMIC	PAIRED	12.32	100	ILLUMINA	Illumina HiSeq 2000	https://sra-download.ncbi.nlm.nih.gov/traces/sra17/SRR/001157/SRR1185203	ftp://ftp.sra.ebi.ac.uk/vol1/fastq/SRR118/003/SRR1185203/SRR1185203_1.fastq.gz	ftp://ftp.sra.ebi.ac.uk/vol1/fastq/SRR118/003/SRR1185203/SRR1185203_2.fastq.gz	source_name: Liver || tissue: liver || strain: Yorkshire-Landrace || fed status: Fasted || survival: Lived || time point: 2 hours after resuscitation began || tissue: liver biopsy	liver	Yorkshire-Landrace	unknown	unknown
159	SRS567143	Sus scrofa	PRJNA240332	SRR1185204	SRX482626	RNA-Seq	cDNA	TRANSCRIPTOMIC	PAIRED	11.51	100	ILLUMINA	Illumina HiSeq 2000	https://sra-download.ncbi.nlm.nih.gov/traces/sra17/SRR/001157/SRR1185204	ftp://ftp.sra.ebi.ac.uk/vol1/fastq/SRR118/004/SRR1185204/SRR1185204_1.fastq.gz	ftp://ftp.sra.ebi.ac.uk/vol1/fastq/SRR118/004/SRR1185204/SRR1185204_2.fastq.gz	source_name: Liver || tissue: liver || strain: Yorkshire-Landrace || fed status: Fasted || survival: Lived || time point: 8 hours after resuscitation began || tissue: liver biopsy	liver	Yorkshire-Landrace	unknown	unknown
160	SRS567144	Sus scrofa	PRJNA240332	SRR1185205	SRX482627	RNA-Seq	cDNA	TRANSCRIPTOMIC	PAIRED	11.1	100	ILLUMINA	Illumina HiSeq 2000	https://sra-download.ncbi.nlm.nih.gov/traces/sra17/SRR/001157/SRR1185205	ftp://ftp.sra.ebi.ac.uk/vol1/fastq/SRR118/005/SRR1185205/SRR1185205_1.fastq.gz	ftp://ftp.sra.ebi.ac.uk/vol1/fastq/SRR118/005/SRR1185205/SRR1185205_2.fastq.gz	source_name: Liver || tissue: liver || strain: Yorkshire-Landrace || fed status: Fasted || survival: Lived || time point: 20 hours after resuscitation began || tissue: liver biopsy	liver	Yorkshire-Landrace	unknown	unknown
161	SRS567145	Sus scrofa	PRJNA240332	SRR1185206	SRX482628	RNA-Seq	cDNA	TRANSCRIPTOMIC	PAIRED	11.74	100	ILLUMINA	Illumina HiSeq 2000	https://sra-download.ncbi.nlm.nih.gov/traces/sra17/SRR/001157/SRR1185206	ftp://ftp.sra.ebi.ac.uk/vol1/fastq/SRR118/006/SRR1185206/SRR1185206_1.fastq.gz	ftp://ftp.sra.ebi.ac.uk/vol1/fastq/SRR118/006/SRR1185206/SRR1185206_2.fastq.gz	source_name: Liver || tissue: liver || strain: Yorkshire-Landrace || fed status: Fasted || survival: Lived || time point: Baseline || tissue: liver biopsy	liver	Yorkshire-Landrace	unknown	unknown
162	SRS567146	Sus scrofa	PRJNA240332	SRR1185207	SRX482629	RNA-Seq	cDNA	TRANSCRIPTOMIC	PAIRED	10.53	100	ILLUMINA	Illumina HiSeq 2000	https://sra-download.ncbi.nlm.nih.gov/traces/sra17/SRR/001157/SRR1185207	ftp://ftp.sra.ebi.ac.uk/vol1/fastq/SRR118/007/SRR1185207/SRR1185207_1.fastq.gz	ftp://ftp.sra.ebi.ac.uk/vol1/fastq/SRR118/007/SRR1185207/SRR1185207_2.fastq.gz	source_name: Liver || tissue: liver || strain: Yorkshire-Landrace || fed status: Fasted || survival: Lived || time point: 2 hours after resuscitation began || tissue: liver biopsy	liver	Yorkshire-Landrace	unknown	unknown
163	SRS567147	Sus scrofa	PRJNA240332	SRR1185208	SRX482630	RNA-Seq	cDNA	TRANSCRIPTOMIC	PAIRED	12.15	100	ILLUMINA	Illumina HiSeq 2000	https://sra-download.ncbi.nlm.nih.gov/traces/sra17/SRR/001157/SRR1185208	ftp://ftp.sra.ebi.ac.uk/vol1/fastq/SRR118/008/SRR1185208/SRR1185208_1.fastq.gz	ftp://ftp.sra.ebi.ac.uk/vol1/fastq/SRR118/008/SRR1185208/SRR1185208_2.fastq.gz	source_name: Liver || tissue: liver || strain: Yorkshire-Landrace || fed status: Fasted || survival: Lived || time point: 8 hours after resuscitation began || tissue: liver biopsy	liver	Yorkshire-Landrace	unknown	unknown
164	SRS567148	Sus scrofa	PRJNA240332	SRR1185209	SRX482631	RNA-Seq	cDNA	TRANSCRIPTOMIC	PAIRED	13.41	100	ILLUMINA	Illumina HiSeq 2000	https://sra-download.ncbi.nlm.nih.gov/traces/sra17/SRR/001157/SRR1185209	ftp://ftp.sra.ebi.ac.uk/vol1/fastq/SRR118/009/SRR1185209/SRR1185209_1.fastq.gz	ftp://ftp.sra.ebi.ac.uk/vol1/fastq/SRR118/009/SRR1185209/SRR1185209_2.fastq.gz	source_name: Liver || tissue: liver || strain: Yorkshire-Landrace || fed status: Fasted || survival: Lived || time point: 20 hours after resuscitation began || tissue: liver biopsy	liver	Yorkshire-Landrace	unknown	unknown
165	SRS567149	Sus scrofa	PRJNA240332	SRR1185210	SRX482632	RNA-Seq	cDNA	TRANSCRIPTOMIC	PAIRED	11.18	100	ILLUMINA	Illumina HiSeq 2000	https://sra-download.ncbi.nlm.nih.gov/traces/sra17/SRR/001157/SRR1185210	ftp://ftp.sra.ebi.ac.uk/vol1/fastq/SRR118/000/SRR1185210/SRR1185210_1.fastq.gz	ftp://ftp.sra.ebi.ac.uk/vol1/fastq/SRR118/000/SRR1185210/SRR1185210_2.fastq.gz	source_name: Liver || tissue: liver || strain: Yorkshire-Landrace || fed status: Fasted || survival: Lived || time point: Baseline || tissue: liver biopsy	liver	Yorkshire-Landrace	unknown	unknown
166	SRS567150	Sus scrofa	PRJNA240332	SRR1185211	SRX482633	RNA-Seq	cDNA	TRANSCRIPTOMIC	PAIRED	11.26	100	ILLUMINA	Illumina HiSeq 2000	https://sra-download.ncbi.nlm.nih.gov/traces/sra17/SRR/001157/SRR1185211	ftp://ftp.sra.ebi.ac.uk/vol1/fastq/SRR118/001/SRR1185211/SRR1185211_1.fastq.gz	ftp://ftp.sra.ebi.ac.uk/vol1/fastq/SRR118/001/SRR1185211/SRR1185211_2.fastq.gz	source_name: Liver || tissue: liver || strain: Yorkshire-Landrace || fed status: Fasted || survival: Lived || time point: 2 hours after resuscitation began || tissue: liver biopsy	liver	Yorkshire-Landrace	unknown	unknown
167	SRS567151	Sus scrofa	PRJNA240332	SRR1185212	SRX482634	RNA-Seq	cDNA	TRANSCRIPTOMIC	PAIRED	13.81	100	ILLUMINA	Illumina HiSeq 2000	https://sra-download.ncbi.nlm.nih.gov/traces/sra17/SRR/001157/SRR1185212	ftp://ftp.sra.ebi.ac.uk/vol1/fastq/SRR118/002/SRR1185212/SRR1185212_1.fastq.gz	ftp://ftp.sra.ebi.ac.uk/vol1/fastq/SRR118/002/SRR1185212/SRR1185212_2.fastq.gz	source_name: Liver || tissue: liver || strain: Yorkshire-Landrace || fed status: Fasted || survival: Lived || time point: 8 hours after resuscitation began || tissue: liver biopsy	liver	Yorkshire-Landrace	unknown	unknown
168	SRS567152	Sus scrofa	PRJNA240332	SRR1185213	SRX482635	RNA-Seq	cDNA	TRANSCRIPTOMIC	PAIRED	11.61	100	ILLUMINA	Illumina HiSeq 2000	https://sra-download.ncbi.nlm.nih.gov/traces/sra17/SRR/001157/SRR1185213	ftp://ftp.sra.ebi.ac.uk/vol1/fastq/SRR118/003/SRR1185213/SRR1185213_1.fastq.gz	ftp://ftp.sra.ebi.ac.uk/vol1/fastq/SRR118/003/SRR1185213/SRR1185213_2.fastq.gz	source_name: Liver || tissue: liver || strain: Yorkshire-Landrace || fed status: Fasted || survival: Lived || time point: 20 hours after resuscitation began || tissue: liver biopsy	liver	Yorkshire-Landrace	unknown	unknown
169	SRS567153	Sus scrofa	PRJNA240332	SRR1185214	SRX482636	RNA-Seq	cDNA	TRANSCRIPTOMIC	PAIRED	10.74	100	ILLUMINA	Illumina HiSeq 2000	https://sra-download.ncbi.nlm.nih.gov/traces/sra17/SRR/001157/SRR1185214	ftp://ftp.sra.ebi.ac.uk/vol1/fastq/SRR118/004/SRR1185214/SRR1185214_1.fastq.gz	ftp://ftp.sra.ebi.ac.uk/vol1/fastq/SRR118/004/SRR1185214/SRR1185214_2.fastq.gz	source_name: Liver || tissue: liver || strain: Yorkshire-Landrace || fed status: Fasted || survival: Lived || time point: Baseline || tissue: liver biopsy	liver	Yorkshire-Landrace	unknown	unknown
170	SRS604843	Sus scrofa	PRJNA246567	SRR1282322	SRX539735	RNA-Seq	cDNA	TRANSCRIPTOMIC	PAIRED	17.24	115	ILLUMINA	Illumina Genome Analyzer IIx		ftp://ftp.sra.ebi.ac.uk/vol1/fastq/SRR128/002/SRR1282322/SRR1282322_1.fastq.gz	ftp://ftp.sra.ebi.ac.uk/vol1/fastq/SRR128/002/SRR1282322/SRR1282322_2.fastq.gz	source_name: muscle || drip: HI || tissue: muscle || age: post natal day 179 || gender: female	muscle	unknown	post natal day 179	female
171	SRS604844	Sus scrofa	PRJNA246567	SRR1282323	SRX539736	RNA-Seq	cDNA	TRANSCRIPTOMIC	PAIRED	17.03	115	ILLUMINA	Illumina Genome Analyzer IIx		ftp://ftp.sra.ebi.ac.uk/vol1/fastq/SRR128/003/SRR1282323/SRR1282323_1.fastq.gz	ftp://ftp.sra.ebi.ac.uk/vol1/fastq/SRR128/003/SRR1282323/SRR1282323_2.fastq.gz	source_name: muscle || drip: LO || tissue: muscle || age: post natal day 181 || gender: female	muscle	unknown	post natal day 181	female
172	SRS604845	Sus scrofa	PRJNA246567	SRR1282324	SRX539737	RNA-Seq	cDNA	TRANSCRIPTOMIC	PAIRED	24.17	115	ILLUMINA	Illumina Genome Analyzer IIx		ftp://ftp.sra.ebi.ac.uk/vol1/fastq/SRR128/004/SRR1282324/SRR1282324_1.fastq.gz	ftp://ftp.sra.ebi.ac.uk/vol1/fastq/SRR128/004/SRR1282324/SRR1282324_2.fastq.gz	source_name: muscle || drip: HI || tissue: muscle || age: post natal day 173 || gender: female	muscle	unknown	post natal day 173	female
173	SRS604846	Sus scrofa	PRJNA246567	SRR1282325	SRX539738	RNA-Seq	cDNA	TRANSCRIPTOMIC	PAIRED	17.48	115	ILLUMINA	Illumina Genome Analyzer IIx		ftp://ftp.sra.ebi.ac.uk/vol1/fastq/SRR128/005/SRR1282325/SRR1282325_1.fastq.gz	ftp://ftp.sra.ebi.ac.uk/vol1/fastq/SRR128/005/SRR1282325/SRR1282325_2.fastq.gz	source_name: muscle || drip: LO || tissue: muscle || age: post natal day 173 || gender: female	muscle	unknown	post natal day 173	female
174	SRS604847	Sus scrofa	PRJNA246567	SRR1282326	SRX539739	RNA-Seq	cDNA	TRANSCRIPTOMIC	PAIRED	19.5	115	ILLUMINA	Illumina Genome Analyzer IIx		ftp://ftp.sra.ebi.ac.uk/vol1/fastq/SRR128/006/SRR1282326/SRR1282326_1.fastq.gz	ftp://ftp.sra.ebi.ac.uk/vol1/fastq/SRR128/006/SRR1282326/SRR1282326_2.fastq.gz	source_name: muscle || drip: HI || tissue: muscle || age: post natal day 181 || gender: female	muscle	unknown	post natal day 181	female
175	SRS604848	Sus scrofa	PRJNA246567	SRR1282327	SRX539740	RNA-Seq	cDNA	TRANSCRIPTOMIC	PAIRED	16.89	115	ILLUMINA	Illumina Genome Analyzer IIx		ftp://ftp.sra.ebi.ac.uk/vol1/fastq/SRR128/007/SRR1282327/SRR1282327_1.fastq.gz	ftp://ftp.sra.ebi.ac.uk/vol1/fastq/SRR128/007/SRR1282327/SRR1282327_2.fastq.gz	source_name: muscle || drip: LO || tissue: muscle || age: post natal day 189 || gender: female	muscle	unknown	post natal day 189	female
176	SRS604849	Sus scrofa	PRJNA246567	SRR1282328	SRX539741	RNA-Seq	cDNA	TRANSCRIPTOMIC	PAIRED	21.81	115	ILLUMINA	Illumina Genome Analyzer IIx		ftp://ftp.sra.ebi.ac.uk/vol1/fastq/SRR128/008/SRR1282328/SRR1282328_1.fastq.gz	ftp://ftp.sra.ebi.ac.uk/vol1/fastq/SRR128/008/SRR1282328/SRR1282328_2.fastq.gz	source_name: muscle || drip: HI || tissue: muscle || age: post natal day 172 || gender: male	muscle	unknown	post natal day 172	male
177	SRS604850	Sus scrofa	PRJNA246567	SRR1282329	SRX539742	RNA-Seq	cDNA	TRANSCRIPTOMIC	PAIRED	17.5	115	ILLUMINA	Illumina Genome Analyzer IIx		ftp://ftp.sra.ebi.ac.uk/vol1/fastq/SRR128/009/SRR1282329/SRR1282329_1.fastq.gz	ftp://ftp.sra.ebi.ac.uk/vol1/fastq/SRR128/009/SRR1282329/SRR1282329_2.fastq.gz	source_name: muscle || drip: LO || tissue: muscle || age: post natal day 179 || gender: male	muscle	unknown	post natal day 179	male
178	SRS604851	Sus scrofa	PRJNA246567	SRR1282331	SRX539744	RNA-Seq	cDNA	TRANSCRIPTOMIC	PAIRED	15.01	115	ILLUMINA	Illumina Genome Analyzer IIx		ftp://ftp.sra.ebi.ac.uk/vol1/fastq/SRR128/001/SRR1282331/SRR1282331_1.fastq.gz	ftp://ftp.sra.ebi.ac.uk/vol1/fastq/SRR128/001/SRR1282331/SRR1282331_2.fastq.gz	source_name: muscle || drip: HI || tissue: muscle || age: post natal day 186 || gender: male	muscle	unknown	post natal day 186	male
179	SRS604852	Sus scrofa	PRJNA246567	SRR1282330	SRX539743	RNA-Seq	cDNA	TRANSCRIPTOMIC	PAIRED	20.72	115	ILLUMINA	Illumina Genome Analyzer IIx		ftp://ftp.sra.ebi.ac.uk/vol1/fastq/SRR128/000/SRR1282330/SRR1282330_1.fastq.gz	ftp://ftp.sra.ebi.ac.uk/vol1/fastq/SRR128/000/SRR1282330/SRR1282330_2.fastq.gz	source_name: muscle || drip: LO || tissue: muscle || age: post natal day 172 || gender: male	muscle	unknown	post natal day 172	male
180	SRS604853	Sus scrofa	PRJNA246567	SRR1282332	SRX539745	RNA-Seq	cDNA	TRANSCRIPTOMIC	PAIRED	19.32	115	ILLUMINA	Illumina Genome Analyzer IIx		ftp://ftp.sra.ebi.ac.uk/vol1/fastq/SRR128/002/SRR1282332/SRR1282332_1.fastq.gz	ftp://ftp.sra.ebi.ac.uk/vol1/fastq/SRR128/002/SRR1282332/SRR1282332_2.fastq.gz	source_name: muscle || drip: HI || tissue: muscle || age: post natal day 167 || gender: male	muscle	unknown	post natal day 167	male
181	SRS604854	Sus scrofa	PRJNA246567	SRR1282333	SRX539746	RNA-Seq	cDNA	TRANSCRIPTOMIC	PAIRED	21.12	115	ILLUMINA	Illumina Genome Analyzer IIx		ftp://ftp.sra.ebi.ac.uk/vol1/fastq/SRR128/003/SRR1282333/SRR1282333_1.fastq.gz	ftp://ftp.sra.ebi.ac.uk/vol1/fastq/SRR128/003/SRR1282333/SRR1282333_2.fastq.gz	source_name: muscle || drip: LO || tissue: muscle || age: post natal day 172 || gender: male	muscle	unknown	post natal day 172	male
182	SRS662117	Sus scrofa	PRJNA255281	SRR1519321	SRX656543	RNA-Seq	cDNA	TRANSCRIPTOMIC	PAIRED	26.56	180	ILLUMINA	Illumina HiSeq 2000	https://sra-download.ncbi.nlm.nih.gov/traces/sra20/SRR/001483/SRR1519321	ftp://ftp.sra.ebi.ac.uk/vol1/fastq/SRR151/001/SRR1519321/SRR1519321_1.fastq.gz	ftp://ftp.sra.ebi.ac.uk/vol1/fastq/SRR151/001/SRR1519321/SRR1519321_2.fastq.gz	breed: Erhualian and Shaziling || age: 14.25 days || biomaterial_provider: Key Laboratory for Animal Biotechnology of Jiangxi Province and the Ministry of Agriculture of China, Jiangxi Agricultural University, Nanchang 330045, P. R. China. || sex: not collected || tissue: embryo || BioSampleModel: Model organism or animal	embryo	Erhualian and Shaziling	14.25 days	not collected
183	SRS699626	Sus scrofa	PRJNA260632	SRR1572008	SRX698199	RNA-Seq	cDNA	TRANSCRIPTOMIC	PAIRED	21.1	202	ILLUMINA	Illumina HiSeq 2500	https://sra-download.ncbi.nlm.nih.gov/traces/sra21/SRR/001535/SRR1572008	ftp://ftp.sra.ebi.ac.uk/vol1/fastq/SRR157/008/SRR1572008/SRR1572008_1.fastq.gz	ftp://ftp.sra.ebi.ac.uk/vol1/fastq/SRR157/008/SRR1572008/SRR1572008_2.fastq.gz	source_name: subcuteneous adipose tissue || tissue: subcuteneous adipose || biological_state: Low || Sex: f	subcutaneous adipose	unknown	unknown	female
184	SRS699627	Sus scrofa	PRJNA260632	SRR1572009	SRX698200	RNA-Seq	cDNA	TRANSCRIPTOMIC	PAIRED	18.49	202	ILLUMINA	Illumina HiSeq 2500	https://sra-download.ncbi.nlm.nih.gov/traces/sra21/SRR/001535/SRR1572009	ftp://ftp.sra.ebi.ac.uk/vol1/fastq/SRR157/009/SRR1572009/SRR1572009_1.fastq.gz	ftp://ftp.sra.ebi.ac.uk/vol1/fastq/SRR157/009/SRR1572009/SRR1572009_2.fastq.gz	source_name: subcuteneous adipose tissue || tissue: subcuteneous adipose || biological_state: Low || Sex: m	subcutaneous adipose	unknown	unknown	male
185	SRS699628	Sus scrofa	PRJNA260632	SRR1572010	SRX698201	RNA-Seq	cDNA	TRANSCRIPTOMIC	PAIRED	17.59	202	ILLUMINA	Illumina HiSeq 2500	https://sra-download.ncbi.nlm.nih.gov/traces/sra21/SRR/001535/SRR1572010	ftp://ftp.sra.ebi.ac.uk/vol1/fastq/SRR157/000/SRR1572010/SRR1572010_1.fastq.gz	ftp://ftp.sra.ebi.ac.uk/vol1/fastq/SRR157/000/SRR1572010/SRR1572010_2.fastq.gz	source_name: subcuteneous adipose tissue || tissue: subcuteneous adipose || biological_state: Low || Sex: f	subcutaneous adipose	unknown	unknown	female
186	SRS699629	Sus scrofa	PRJNA260632	SRR1572011	SRX698202	RNA-Seq	cDNA	TRANSCRIPTOMIC	PAIRED	17.66	202	ILLUMINA	Illumina HiSeq 2500	https://sra-download.ncbi.nlm.nih.gov/traces/sra21/SRR/001535/SRR1572011	ftp://ftp.sra.ebi.ac.uk/vol1/fastq/SRR157/001/SRR1572011/SRR1572011_1.fastq.gz	ftp://ftp.sra.ebi.ac.uk/vol1/fastq/SRR157/001/SRR1572011/SRR1572011_2.fastq.gz	source_name: subcuteneous adipose tissue || tissue: subcuteneous adipose || biological_state: Low || Sex: m	subcutaneous adipose	unknown	unknown	male
187	SRS699630	Sus scrofa	PRJNA260632	SRR1572012	SRX698203	RNA-Seq	cDNA	TRANSCRIPTOMIC	PAIRED	19.33	202	ILLUMINA	Illumina HiSeq 2500	https://sra-download.ncbi.nlm.nih.gov/traces/sra21/SRR/001535/SRR1572012	ftp://ftp.sra.ebi.ac.uk/vol1/fastq/SRR157/002/SRR1572012/SRR1572012_1.fastq.gz	ftp://ftp.sra.ebi.ac.uk/vol1/fastq/SRR157/002/SRR1572012/SRR1572012_2.fastq.gz	source_name: subcuteneous adipose tissue || tissue: subcuteneous adipose || biological_state: Low || Sex: m	subcutaneous adipose	unknown	unknown	male
188	SRS699631	Sus scrofa	PRJNA260632	SRR1572013	SRX698204	RNA-Seq	cDNA	TRANSCRIPTOMIC	PAIRED	20.08	202	ILLUMINA	Illumina HiSeq 2500	https://sra-download.ncbi.nlm.nih.gov/traces/sra21/SRR/001535/SRR1572013	ftp://ftp.sra.ebi.ac.uk/vol1/fastq/SRR157/003/SRR1572013/SRR1572013_1.fastq.gz	ftp://ftp.sra.ebi.ac.uk/vol1/fastq/SRR157/003/SRR1572013/SRR1572013_2.fastq.gz	source_name: subcuteneous adipose tissue || tissue: subcuteneous adipose || biological_state: Low || Sex: f	subcutaneous adipose	unknown	unknown	female
189	SRS699632	Sus scrofa	PRJNA260632	SRR1572014	SRX698205	RNA-Seq	cDNA	TRANSCRIPTOMIC	PAIRED	19.2	202	ILLUMINA	Illumina HiSeq 2500	https://sra-download.ncbi.nlm.nih.gov/traces/sra21/SRR/001535/SRR1572014	ftp://ftp.sra.ebi.ac.uk/vol1/fastq/SRR157/004/SRR1572014/SRR1572014_1.fastq.gz	ftp://ftp.sra.ebi.ac.uk/vol1/fastq/SRR157/004/SRR1572014/SRR1572014_2.fastq.gz	source_name: subcuteneous adipose tissue || tissue: subcuteneous adipose || biological_state: Low || Sex: m	subcutaneous adipose	unknown	unknown	male
190	SRS699633	Sus scrofa	PRJNA260632	SRR1572015	SRX698206	RNA-Seq	cDNA	TRANSCRIPTOMIC	PAIRED	16.39	202	ILLUMINA	Illumina HiSeq 2500	https://sra-download.ncbi.nlm.nih.gov/traces/sra21/SRR/001535/SRR1572015	ftp://ftp.sra.ebi.ac.uk/vol1/fastq/SRR157/005/SRR1572015/SRR1572015_1.fastq.gz	ftp://ftp.sra.ebi.ac.uk/vol1/fastq/SRR157/005/SRR1572015/SRR1572015_2.fastq.gz	source_name: subcuteneous adipose tissue || tissue: subcuteneous adipose || biological_state: Low || Sex: f	subcutaneous adipose	unknown	unknown	female
191	SRS699634	Sus scrofa	PRJNA260632	SRR1572016	SRX698207	RNA-Seq	cDNA	TRANSCRIPTOMIC	PAIRED	16.19	202	ILLUMINA	Illumina HiSeq 2500	https://sra-download.ncbi.nlm.nih.gov/traces/sra21/SRR/001535/SRR1572016	ftp://ftp.sra.ebi.ac.uk/vol1/fastq/SRR157/006/SRR1572016/SRR1572016_1.fastq.gz	ftp://ftp.sra.ebi.ac.uk/vol1/fastq/SRR157/006/SRR1572016/SRR1572016_2.fastq.gz	source_name: subcuteneous adipose tissue || tissue: subcuteneous adipose || biological_state: Low || Sex: m	subcutaneous adipose	unknown	unknown	male
192	SRS699635	Sus scrofa	PRJNA260632	SRR1572017	SRX698208	RNA-Seq	cDNA	TRANSCRIPTOMIC	PAIRED	18.26	202	ILLUMINA	Illumina HiSeq 2500	https://sra-download.ncbi.nlm.nih.gov/traces/sra21/SRR/001535/SRR1572017	ftp://ftp.sra.ebi.ac.uk/vol1/fastq/SRR157/007/SRR1572017/SRR1572017_1.fastq.gz	ftp://ftp.sra.ebi.ac.uk/vol1/fastq/SRR157/007/SRR1572017/SRR1572017_2.fastq.gz	source_name: subcuteneous adipose tissue || tissue: subcuteneous adipose || biological_state: Low || Sex: m	subcutaneous adipose	unknown	unknown	male
193	SRS699636	Sus scrofa	PRJNA260632	SRR1572018	SRX698209	RNA-Seq	cDNA	TRANSCRIPTOMIC	PAIRED	16.72	202	ILLUMINA	Illumina HiSeq 2500	https://sra-download.ncbi.nlm.nih.gov/traces/sra21/SRR/001535/SRR1572018	ftp://ftp.sra.ebi.ac.uk/vol1/fastq/SRR157/008/SRR1572018/SRR1572018_1.fastq.gz	ftp://ftp.sra.ebi.ac.uk/vol1/fastq/SRR157/008/SRR1572018/SRR1572018_2.fastq.gz	source_name: subcuteneous adipose tissue || tissue: subcuteneous adipose || biological_state: Low || Sex: m	subcutaneous adipose	unknown	unknown	male
194	SRS699637	Sus scrofa	PRJNA260632	SRR1572019	SRX698210	RNA-Seq	cDNA	TRANSCRIPTOMIC	PAIRED	16.49	202	ILLUMINA	Illumina HiSeq 2500	https://sra-download.ncbi.nlm.nih.gov/traces/sra21/SRR/001535/SRR1572019	ftp://ftp.sra.ebi.ac.uk/vol1/fastq/SRR157/009/SRR1572019/SRR1572019_1.fastq.gz	ftp://ftp.sra.ebi.ac.uk/vol1/fastq/SRR157/009/SRR1572019/SRR1572019_2.fastq.gz	source_name: subcuteneous adipose tissue || tissue: subcuteneous adipose || biological_state: Low || Sex: f	subcutaneous adipose	unknown	unknown	female
195	SRS699638	Sus scrofa	PRJNA260632	SRR1572020	SRX698211	RNA-Seq	cDNA	TRANSCRIPTOMIC	PAIRED	17.79	202	ILLUMINA	Illumina HiSeq 2500	https://sra-download.ncbi.nlm.nih.gov/traces/sra21/SRR/001535/SRR1572020	ftp://ftp.sra.ebi.ac.uk/vol1/fastq/SRR157/000/SRR1572020/SRR1572020_1.fastq.gz	ftp://ftp.sra.ebi.ac.uk/vol1/fastq/SRR157/000/SRR1572020/SRR1572020_2.fastq.gz	source_name: subcuteneous adipose tissue || tissue: subcuteneous adipose || biological_state: Mean || Sex: f	subcutaneous adipose	unknown	unknown	female
196	SRS699639	Sus scrofa	PRJNA260632	SRR1572021	SRX698212	RNA-Seq	cDNA	TRANSCRIPTOMIC	PAIRED	17.37	202	ILLUMINA	Illumina HiSeq 2500	https://sra-download.ncbi.nlm.nih.gov/traces/sra21/SRR/001535/SRR1572021	ftp://ftp.sra.ebi.ac.uk/vol1/fastq/SRR157/001/SRR1572021/SRR1572021_1.fastq.gz	ftp://ftp.sra.ebi.ac.uk/vol1/fastq/SRR157/001/SRR1572021/SRR1572021_2.fastq.gz	source_name: subcuteneous adipose tissue || tissue: subcuteneous adipose || biological_state: Mean || Sex: m	subcutaneous adipose	unknown	unknown	male
197	SRS699640	Sus scrofa	PRJNA260632	SRR1572022	SRX698213	RNA-Seq	cDNA	TRANSCRIPTOMIC	PAIRED	17.09	202	ILLUMINA	Illumina HiSeq 2500	https://sra-download.ncbi.nlm.nih.gov/traces/sra21/SRR/001535/SRR1572022	ftp://ftp.sra.ebi.ac.uk/vol1/fastq/SRR157/002/SRR1572022/SRR1572022_1.fastq.gz	ftp://ftp.sra.ebi.ac.uk/vol1/fastq/SRR157/002/SRR1572022/SRR1572022_2.fastq.gz	source_name: subcuteneous adipose tissue || tissue: subcuteneous adipose || biological_state: Mean || Sex: f	subcutaneous adipose	unknown	unknown	female
198	SRS699641	Sus scrofa	PRJNA260632	SRR1572023	SRX698214	RNA-Seq	cDNA	TRANSCRIPTOMIC	PAIRED	18.91	202	ILLUMINA	Illumina HiSeq 2500	https://sra-download.ncbi.nlm.nih.gov/traces/sra21/SRR/001535/SRR1572023	ftp://ftp.sra.ebi.ac.uk/vol1/fastq/SRR157/003/SRR1572023/SRR1572023_1.fastq.gz	ftp://ftp.sra.ebi.ac.uk/vol1/fastq/SRR157/003/SRR1572023/SRR1572023_2.fastq.gz	source_name: subcuteneous adipose tissue || tissue: subcuteneous adipose || biological_state: Mean || Sex: f	subcutaneous adipose	unknown	unknown	female
199	SRS699642	Sus scrofa	PRJNA260632	SRR1572024	SRX698215	RNA-Seq	cDNA	TRANSCRIPTOMIC	PAIRED	17.94	202	ILLUMINA	Illumina HiSeq 2500	https://sra-download.ncbi.nlm.nih.gov/traces/sra21/SRR/001535/SRR1572024	ftp://ftp.sra.ebi.ac.uk/vol1/fastq/SRR157/004/SRR1572024/SRR1572024_1.fastq.gz	ftp://ftp.sra.ebi.ac.uk/vol1/fastq/SRR157/004/SRR1572024/SRR1572024_2.fastq.gz	source_name: subcuteneous adipose tissue || tissue: subcuteneous adipose || biological_state: Mean || Sex: f	subcutaneous adipose	unknown	unknown	female
200	SRS699643	Sus scrofa	PRJNA260632	SRR1572025	SRX698216	RNA-Seq	cDNA	TRANSCRIPTOMIC	PAIRED	18.96	202	ILLUMINA	Illumina HiSeq 2500	https://sra-download.ncbi.nlm.nih.gov/traces/sra21/SRR/001535/SRR1572025	ftp://ftp.sra.ebi.ac.uk/vol1/fastq/SRR157/005/SRR1572025/SRR1572025_1.fastq.gz	ftp://ftp.sra.ebi.ac.uk/vol1/fastq/SRR157/005/SRR1572025/SRR1572025_2.fastq.gz	source_name: subcuteneous adipose tissue || tissue: subcuteneous adipose || biological_state: Mean || Sex: m	subcutaneous adipose	unknown	unknown	male
201	SRS699644	Sus scrofa	PRJNA260632	SRR1572026	SRX698217	RNA-Seq	cDNA	TRANSCRIPTOMIC	PAIRED	19.05	202	ILLUMINA	Illumina HiSeq 2500	https://sra-download.ncbi.nlm.nih.gov/traces/sra21/SRR/001535/SRR1572026	ftp://ftp.sra.ebi.ac.uk/vol1/fastq/SRR157/006/SRR1572026/SRR1572026_1.fastq.gz	ftp://ftp.sra.ebi.ac.uk/vol1/fastq/SRR157/006/SRR1572026/SRR1572026_2.fastq.gz	source_name: subcuteneous adipose tissue || tissue: subcuteneous adipose || biological_state: Mean || Sex: m	subcutaneous adipose	unknown	unknown	male
202	SRS699645	Sus scrofa	PRJNA260632	SRR1572027	SRX698218	RNA-Seq	cDNA	TRANSCRIPTOMIC	PAIRED	17.8	202	ILLUMINA	Illumina HiSeq 2500	https://sra-download.ncbi.nlm.nih.gov/traces/sra21/SRR/001535/SRR1572027	ftp://ftp.sra.ebi.ac.uk/vol1/fastq/SRR157/007/SRR1572027/SRR1572027_1.fastq.gz	ftp://ftp.sra.ebi.ac.uk/vol1/fastq/SRR157/007/SRR1572027/SRR1572027_2.fastq.gz	source_name: subcuteneous adipose tissue || tissue: subcuteneous adipose || biological_state: Mean || Sex: f	subcutaneous adipose	unknown	unknown	female
203	SRS699646	Sus scrofa	PRJNA260632	SRR1572028	SRX698219	RNA-Seq	cDNA	TRANSCRIPTOMIC	PAIRED	18.01	202	ILLUMINA	Illumina HiSeq 2500	https://sra-download.ncbi.nlm.nih.gov/traces/sra21/SRR/001535/SRR1572028	ftp://ftp.sra.ebi.ac.uk/vol1/fastq/SRR157/008/SRR1572028/SRR1572028_1.fastq.gz	ftp://ftp.sra.ebi.ac.uk/vol1/fastq/SRR157/008/SRR1572028/SRR1572028_2.fastq.gz	source_name: subcuteneous adipose tissue || tissue: subcuteneous adipose || biological_state: Mean || Sex: m	subcutaneous adipose	unknown	unknown	male
204	SRS699647	Sus scrofa	PRJNA260632	SRR1572029	SRX698220	RNA-Seq	cDNA	TRANSCRIPTOMIC	PAIRED	19.4	202	ILLUMINA	Illumina HiSeq 2500	https://sra-download.ncbi.nlm.nih.gov/traces/sra21/SRR/001535/SRR1572029	ftp://ftp.sra.ebi.ac.uk/vol1/fastq/SRR157/009/SRR1572029/SRR1572029_1.fastq.gz	ftp://ftp.sra.ebi.ac.uk/vol1/fastq/SRR157/009/SRR1572029/SRR1572029_2.fastq.gz	source_name: subcuteneous adipose tissue || tissue: subcuteneous adipose || biological_state: Mean || Sex: f	subcutaneous adipose	unknown	unknown	female
205	SRS699648	Sus scrofa	PRJNA260632	SRR1572030	SRX698221	RNA-Seq	cDNA	TRANSCRIPTOMIC	PAIRED	16.85	202	ILLUMINA	Illumina HiSeq 2500	https://sra-download.ncbi.nlm.nih.gov/traces/sra21/SRR/001535/SRR1572030	ftp://ftp.sra.ebi.ac.uk/vol1/fastq/SRR157/000/SRR1572030/SRR1572030_1.fastq.gz	ftp://ftp.sra.ebi.ac.uk/vol1/fastq/SRR157/000/SRR1572030/SRR1572030_2.fastq.gz	source_name: subcuteneous adipose tissue || tissue: subcuteneous adipose || biological_state: Mean || Sex: m	subcutaneous adipose	unknown	unknown	male
206	SRS699649	Sus scrofa	PRJNA260632	SRR1572031	SRX698222	RNA-Seq	cDNA	TRANSCRIPTOMIC	PAIRED	16.66	202	ILLUMINA	Illumina HiSeq 2500	https://sra-download.ncbi.nlm.nih.gov/traces/sra21/SRR/001535/SRR1572031	ftp://ftp.sra.ebi.ac.uk/vol1/fastq/SRR157/001/SRR1572031/SRR1572031_1.fastq.gz	ftp://ftp.sra.ebi.ac.uk/vol1/fastq/SRR157/001/SRR1572031/SRR1572031_2.fastq.gz	source_name: subcuteneous adipose tissue || tissue: subcuteneous adipose || biological_state: Mean || Sex: m	subcutaneous adipose	unknown	unknown	male
207	SRS699650	Sus scrofa	PRJNA260632	SRR1572032	SRX698223	RNA-Seq	cDNA	TRANSCRIPTOMIC	PAIRED	19.3	202	ILLUMINA	Illumina HiSeq 2500	https://sra-download.ncbi.nlm.nih.gov/traces/sra21/SRR/001535/SRR1572032	ftp://ftp.sra.ebi.ac.uk/vol1/fastq/SRR157/002/SRR1572032/SRR1572032_1.fastq.gz	ftp://ftp.sra.ebi.ac.uk/vol1/fastq/SRR157/002/SRR1572032/SRR1572032_2.fastq.gz	source_name: subcuteneous adipose tissue || tissue: subcuteneous adipose || biological_state: High || Sex: f	subcutaneous adipose	unknown	unknown	female
208	SRS699651	Sus scrofa	PRJNA260632	SRR1572033	SRX698224	RNA-Seq	cDNA	TRANSCRIPTOMIC	PAIRED	20.01	202	ILLUMINA	Illumina HiSeq 2500	https://sra-download.ncbi.nlm.nih.gov/traces/sra21/SRR/001535/SRR1572033	ftp://ftp.sra.ebi.ac.uk/vol1/fastq/SRR157/003/SRR1572033/SRR1572033_1.fastq.gz	ftp://ftp.sra.ebi.ac.uk/vol1/fastq/SRR157/003/SRR1572033/SRR1572033_2.fastq.gz	source_name: subcuteneous adipose tissue || tissue: subcuteneous adipose || biological_state: High || Sex: f	subcutaneous adipose	unknown	unknown	female
209	SRS699652	Sus scrofa	PRJNA260632	SRR1572034	SRX698225	RNA-Seq	cDNA	TRANSCRIPTOMIC	PAIRED	19.81	202	ILLUMINA	Illumina HiSeq 2500	https://sra-download.ncbi.nlm.nih.gov/traces/sra21/SRR/001535/SRR1572034	ftp://ftp.sra.ebi.ac.uk/vol1/fastq/SRR157/004/SRR1572034/SRR1572034_1.fastq.gz	ftp://ftp.sra.ebi.ac.uk/vol1/fastq/SRR157/004/SRR1572034/SRR1572034_2.fastq.gz	source_name: subcuteneous adipose tissue || tissue: subcuteneous adipose || biological_state: High || Sex: f	subcutaneous adipose	unknown	unknown	female
210	SRS699653	Sus scrofa	PRJNA260632	SRR1572035	SRX698226	RNA-Seq	cDNA	TRANSCRIPTOMIC	PAIRED	18.83	202	ILLUMINA	Illumina HiSeq 2500	https://sra-download.ncbi.nlm.nih.gov/traces/sra21/SRR/001535/SRR1572035	ftp://ftp.sra.ebi.ac.uk/vol1/fastq/SRR157/005/SRR1572035/SRR1572035_1.fastq.gz	ftp://ftp.sra.ebi.ac.uk/vol1/fastq/SRR157/005/SRR1572035/SRR1572035_2.fastq.gz	source_name: subcuteneous adipose tissue || tissue: subcuteneous adipose || biological_state: High || Sex: m	subcutaneous adipose	unknown	unknown	male
211	SRS699654	Sus scrofa	PRJNA260632	SRR1572036	SRX698227	RNA-Seq	cDNA	TRANSCRIPTOMIC	PAIRED	18.49	202	ILLUMINA	Illumina HiSeq 2500	https://sra-download.ncbi.nlm.nih.gov/traces/sra21/SRR/001535/SRR1572036	ftp://ftp.sra.ebi.ac.uk/vol1/fastq/SRR157/006/SRR1572036/SRR1572036_1.fastq.gz	ftp://ftp.sra.ebi.ac.uk/vol1/fastq/SRR157/006/SRR1572036/SRR1572036_2.fastq.gz	source_name: subcuteneous adipose tissue || tissue: subcuteneous adipose || biological_state: High || Sex: m	subcutaneous adipose	unknown	unknown	male
212	SRS699655	Sus scrofa	PRJNA260632	SRR1572037	SRX698228	RNA-Seq	cDNA	TRANSCRIPTOMIC	PAIRED	17.48	202	ILLUMINA	Illumina HiSeq 2500	https://sra-download.ncbi.nlm.nih.gov/traces/sra21/SRR/001535/SRR1572037	ftp://ftp.sra.ebi.ac.uk/vol1/fastq/SRR157/007/SRR1572037/SRR1572037_1.fastq.gz	ftp://ftp.sra.ebi.ac.uk/vol1/fastq/SRR157/007/SRR1572037/SRR1572037_2.fastq.gz	source_name: subcuteneous adipose tissue || tissue: subcuteneous adipose || biological_state: High || Sex: m	subcutaneous adipose	unknown	unknown	male
213	SRS699656	Sus scrofa	PRJNA260632	SRR1572038	SRX698229	RNA-Seq	cDNA	TRANSCRIPTOMIC	PAIRED	14.95	202	ILLUMINA	Illumina HiSeq 2500	https://sra-download.ncbi.nlm.nih.gov/traces/sra21/SRR/001535/SRR1572038	ftp://ftp.sra.ebi.ac.uk/vol1/fastq/SRR157/008/SRR1572038/SRR1572038_1.fastq.gz	ftp://ftp.sra.ebi.ac.uk/vol1/fastq/SRR157/008/SRR1572038/SRR1572038_2.fastq.gz	source_name: subcuteneous adipose tissue || tissue: subcuteneous adipose || biological_state: High || Sex: f	subcutaneous adipose	unknown	unknown	female
214	SRS699657	Sus scrofa	PRJNA260632	SRR1572039	SRX698230	RNA-Seq	cDNA	TRANSCRIPTOMIC	PAIRED	19.03	202	ILLUMINA	Illumina HiSeq 2500	https://sra-download.ncbi.nlm.nih.gov/traces/sra21/SRR/001535/SRR1572039	ftp://ftp.sra.ebi.ac.uk/vol1/fastq/SRR157/009/SRR1572039/SRR1572039_1.fastq.gz	ftp://ftp.sra.ebi.ac.uk/vol1/fastq/SRR157/009/SRR1572039/SRR1572039_2.fastq.gz	source_name: subcuteneous adipose tissue || tissue: subcuteneous adipose || biological_state: High || Sex: m	subcutaneous adipose	unknown	unknown	male
215	SRS699658	Sus scrofa	PRJNA260632	SRR1572040	SRX698231	RNA-Seq	cDNA	TRANSCRIPTOMIC	PAIRED	15.5	202	ILLUMINA	Illumina HiSeq 2500	https://sra-download.ncbi.nlm.nih.gov/traces/sra21/SRR/001535/SRR1572040	ftp://ftp.sra.ebi.ac.uk/vol1/fastq/SRR157/000/SRR1572040/SRR1572040_1.fastq.gz	ftp://ftp.sra.ebi.ac.uk/vol1/fastq/SRR157/000/SRR1572040/SRR1572040_2.fastq.gz	source_name: subcuteneous adipose tissue || tissue: subcuteneous adipose || biological_state: High || Sex: f	subcutaneous adipose	unknown	unknown	female
216	SRS699659	Sus scrofa	PRJNA260632	SRR1572041	SRX698232	RNA-Seq	cDNA	TRANSCRIPTOMIC	PAIRED	18.1	202	ILLUMINA	Illumina HiSeq 2500	https://sra-download.ncbi.nlm.nih.gov/traces/sra21/SRR/001535/SRR1572041	ftp://ftp.sra.ebi.ac.uk/vol1/fastq/SRR157/001/SRR1572041/SRR1572041_1.fastq.gz	ftp://ftp.sra.ebi.ac.uk/vol1/fastq/SRR157/001/SRR1572041/SRR1572041_2.fastq.gz	source_name: subcuteneous adipose tissue || tissue: subcuteneous adipose || biological_state: High || Sex: f	subcutaneous adipose	unknown	unknown	female
217	SRS699660	Sus scrofa	PRJNA260632	SRR1572042	SRX698233	RNA-Seq	cDNA	TRANSCRIPTOMIC	PAIRED	18.5	202	ILLUMINA	Illumina HiSeq 2500	https://sra-download.ncbi.nlm.nih.gov/traces/sra21/SRR/001535/SRR1572042	ftp://ftp.sra.ebi.ac.uk/vol1/fastq/SRR157/002/SRR1572042/SRR1572042_1.fastq.gz	ftp://ftp.sra.ebi.ac.uk/vol1/fastq/SRR157/002/SRR1572042/SRR1572042_2.fastq.gz	source_name: subcuteneous adipose tissue || tissue: subcuteneous adipose || biological_state: High || Sex: m	subcutaneous adipose	unknown	unknown	male
218	SRS699661	Sus scrofa	PRJNA260632	SRR1572043	SRX698234	RNA-Seq	cDNA	TRANSCRIPTOMIC	PAIRED	18.8	202	ILLUMINA	Illumina HiSeq 2500	https://sra-download.ncbi.nlm.nih.gov/traces/sra21/SRR/001535/SRR1572043	ftp://ftp.sra.ebi.ac.uk/vol1/fastq/SRR157/003/SRR1572043/SRR1572043_1.fastq.gz	ftp://ftp.sra.ebi.ac.uk/vol1/fastq/SRR157/003/SRR1572043/SRR1572043_2.fastq.gz	source_name: subcuteneous adipose tissue || tissue: subcuteneous adipose || biological_state: High || Sex: m	subcutaneous adipose	unknown	unknown	male
219	SRS730391	Sus scrofa	PRJNA264829	SRR1628661	SRX742684	RNA-Seq	cDNA	TRANSCRIPTOMIC	PAIRED	21.51	202	ILLUMINA	Illumina HiSeq 2000	https://sra-download.ncbi.nlm.nih.gov/traces/sra22/SRR/001590/SRR1628661	ftp://ftp.sra.ebi.ac.uk/vol1/fastq/SRR162/001/SRR1628661/SRR1628661_1.fastq.gz	ftp://ftp.sra.ebi.ac.uk/vol1/fastq/SRR162/001/SRR1628661/SRR1628661_2.fastq.gz	source_name: three intact individuals pooled || strain: Chinese Wuzhishan Pigs || tissue: liver || age: 6â€“7 months old	liver	Chinese Wuzhishan Pigs	6â€“7 months old	unknown
220	SRS730392	Sus scrofa	PRJNA264829	SRR1628662	SRX742685	RNA-Seq	cDNA	TRANSCRIPTOMIC	PAIRED	23.97	202	ILLUMINA	Illumina HiSeq 2000	https://sra-download.ncbi.nlm.nih.gov/traces/sra22/SRR/001590/SRR1628662	ftp://ftp.sra.ebi.ac.uk/vol1/fastq/SRR162/002/SRR1628662/SRR1628662_1.fastq.gz	ftp://ftp.sra.ebi.ac.uk/vol1/fastq/SRR162/002/SRR1628662/SRR1628662_2.fastq.gz	source_name: three castrated individuals pooled || strain: Chinese Wuzhishan Pigs || tissue: liver || age: 6â€“7 months old	liver	Chinese Wuzhishan Pigs	6â€“7 months old	unknown
221	SRS730393	Sus scrofa	PRJNA264829	SRR1628663	SRX742686	RNA-Seq	cDNA	TRANSCRIPTOMIC	PAIRED	17.09	202	ILLUMINA	Illumina HiSeq 2000	https://sra-download.ncbi.nlm.nih.gov/traces/sra22/SRR/001590/SRR1628663	ftp://ftp.sra.ebi.ac.uk/vol1/fastq/SRR162/003/SRR1628663/SRR1628663_1.fastq.gz	ftp://ftp.sra.ebi.ac.uk/vol1/fastq/SRR162/003/SRR1628663/SRR1628663_2.fastq.gz	source_name: three castrated and testosterone treatment inividuals pooled || strain: Chinese Wuzhishan Pigs || tissue: liver || age: 6â€“7 months old	liver	Chinese Wuzhishan Pigs	6â€“7 months old	unknown
222	SRS805017	Sus scrofa	PRJNA271310	SRR1736623	SRX825488	RNA-Seq	cDNA	TRANSCRIPTOMIC	PAIRED	65.89	200	ILLUMINA	Illumina HiSeq 2000	https://sra-download.ncbi.nlm.nih.gov/traces/sra24/SRR/001695/SRR1736623	ftp://ftp.sra.ebi.ac.uk/vol1/fastq/SRR173/003/SRR1736623/SRR1736623_1.fastq.gz	ftp://ftp.sra.ebi.ac.uk/vol1/fastq/SRR173/003/SRR1736623/SRR1736623_2.fastq.gz	breed: Meishan piglets || dev_stage: weaned at at 35 days of age || sex: male || tissue: duodenum || BioSampleModel: Model organism or animal	duodenum	Meishan piglets	weaned at at 35 days of age	male
223	SRS805036	Sus scrofa	PRJNA271310	SRR1736622	SRX825508	RNA-Seq	cDNA	TRANSCRIPTOMIC	PAIRED	31.64	202	ILLUMINA	Illumina HiSeq 2000	https://sra-download.ncbi.nlm.nih.gov/traces/sra24/SRR/001695/SRR1736622	ftp://ftp.sra.ebi.ac.uk/vol1/fastq/SRR173/002/SRR1736622/SRR1736622_1.fastq.gz	ftp://ftp.sra.ebi.ac.uk/vol1/fastq/SRR173/002/SRR1736622/SRR1736622_2.fastq.gz	breed: Meishan piglets || dev_stage: weaned at at 35 days of age || sex: male || tissue: duodenum || BioSampleModel: Model organism or animal	duodenum	Meishan piglets	weaned at at 35 days of age	male
224	SRS805037	Sus scrofa	PRJNA271310	SRR1736624	SRX825509	RNA-Seq	cDNA	TRANSCRIPTOMIC	PAIRED	71.41	200	ILLUMINA	Illumina HiSeq 2000	https://sra-download.ncbi.nlm.nih.gov/traces/sra24/SRR/001695/SRR1736624	ftp://ftp.sra.ebi.ac.uk/vol1/fastq/SRR173/004/SRR1736624/SRR1736624_1.fastq.gz	ftp://ftp.sra.ebi.ac.uk/vol1/fastq/SRR173/004/SRR1736624/SRR1736624_2.fastq.gz	breed: Meishan piglets || dev_stage: weaned at at 35 days of age || sex: male || tissue: duodenum || BioSampleModel: Model organism or animal	duodenum	Meishan piglets	weaned at at 35 days of age	male
225	SRS805427	Sus scrofa	PRJNA271310	SRR1737100	SRX825922	RNA-Seq	cDNA	TRANSCRIPTOMIC	PAIRED	65.88	200	ILLUMINA	Illumina HiSeq 2000	https://sra-download.ncbi.nlm.nih.gov/traces/sra24/SRR/001696/SRR1737100	ftp://ftp.sra.ebi.ac.uk/vol1/fastq/SRR173/000/SRR1737100/SRR1737100_1.fastq.gz	ftp://ftp.sra.ebi.ac.uk/vol1/fastq/SRR173/000/SRR1737100/SRR1737100_2.fastq.gz	breed: Meishan piglets || dev_stage: weaned at at 35 days of age || sex: male || tissue: duodenum || BioSampleModel: Model organism or animal	duodenum	Meishan piglets	weaned at at 35 days of age	male
226	SRS805428	Sus scrofa	PRJNA271310	SRR1737101	SRX825923	RNA-Seq	cDNA	TRANSCRIPTOMIC	PAIRED	71.94	200	ILLUMINA	Illumina HiSeq 2000	https://sra-download.ncbi.nlm.nih.gov/traces/sra24/SRR/001696/SRR1737101	ftp://ftp.sra.ebi.ac.uk/vol1/fastq/SRR173/001/SRR1737101/SRR1737101_1.fastq.gz	ftp://ftp.sra.ebi.ac.uk/vol1/fastq/SRR173/001/SRR1737101/SRR1737101_2.fastq.gz	breed: Meishan piglets || dev_stage: weaned at at 35 days of age || sex: male || tissue: duodenum || BioSampleModel: Model organism or animal	duodenum	Meishan piglets	weaned at at 35 days of age	male
227	SRS805429	Sus scrofa	PRJNA271310	SRR1737102	SRX825924	RNA-Seq	cDNA	TRANSCRIPTOMIC	PAIRED	36.41	202	ILLUMINA	Illumina HiSeq 2000	https://sra-download.ncbi.nlm.nih.gov/traces/sra24/SRR/001696/SRR1737102	ftp://ftp.sra.ebi.ac.uk/vol1/fastq/SRR173/002/SRR1737102/SRR1737102_1.fastq.gz	ftp://ftp.sra.ebi.ac.uk/vol1/fastq/SRR173/002/SRR1737102/SRR1737102_2.fastq.gz	breed: Meishan piglets || dev_stage: weaned at at 35 days of age || sex: male || tissue: duodenum || BioSampleModel: Model organism or animal	duodenum	Meishan piglets	weaned at at 35 days of age	male
228	SRS912940	Sus scrofa	PRJNA281483	SRR1979648	SRX998814	RNA-Seq	cDNA	TRANSCRIPTOMIC	PAIRED	89.17	200	ILLUMINA	Illumina HiSeq 2000	https://sra-download.ncbi.nlm.nih.gov/traces/sra27/SRR/001933/SRR1979648	ftp://ftp.sra.ebi.ac.uk/vol1/fastq/SRR197/008/SRR1979648/SRR1979648_1.fastq.gz	ftp://ftp.sra.ebi.ac.uk/vol1/fastq/SRR197/008/SRR1979648/SRR1979648_2.fastq.gz	source_name: backfat || breed: Italian Large White || gender: male || phenotype: castrated || tissue: backfat || age: 241 days || weight: 150-160 kg	backfat	Italian Large White	241 days	male
229	SRS912941	Sus scrofa	PRJNA281483	SRR1979647	SRX998813	RNA-Seq	cDNA	TRANSCRIPTOMIC	PAIRED	89.93	200	ILLUMINA	Illumina HiSeq 2000	https://sra-download.ncbi.nlm.nih.gov/traces/sra27/SRR/001933/SRR1979647	ftp://ftp.sra.ebi.ac.uk/vol1/fastq/SRR197/007/SRR1979647/SRR1979647_1.fastq.gz	ftp://ftp.sra.ebi.ac.uk/vol1/fastq/SRR197/007/SRR1979647/SRR1979647_2.fastq.gz	source_name: backfat || breed: Italian Large White || gender: female || tissue: backfat || age: 250 days || weight: 150-160 kg	backfat	Italian Large White	250 days	female
230	SRS912942	Sus scrofa	PRJNA281483	SRR1979646	SRX998812	RNA-Seq	cDNA	TRANSCRIPTOMIC	PAIRED	97.48	202	ILLUMINA	Illumina HiSeq 2000	https://sra-download.ncbi.nlm.nih.gov/traces/sra27/SRR/001933/SRR1979646	ftp://ftp.sra.ebi.ac.uk/vol1/fastq/SRR197/006/SRR1979646/SRR1979646_1.fastq.gz	ftp://ftp.sra.ebi.ac.uk/vol1/fastq/SRR197/006/SRR1979646/SRR1979646_2.fastq.gz	source_name: backfat || breed: Italian Large White || gender: male || phenotype: castrated || tissue: backfat || age: 235 days || weight: 150-160 kg	backfat	Italian Large White	235 days	male
231	SRS912943	Sus scrofa	PRJNA281483	SRR1979645	SRX998811	RNA-Seq	cDNA	TRANSCRIPTOMIC	PAIRED	108.65	202	ILLUMINA	Illumina HiSeq 2000	https://sra-download.ncbi.nlm.nih.gov/traces/sra27/SRR/001933/SRR1979645	ftp://ftp.sra.ebi.ac.uk/vol1/fastq/SRR197/005/SRR1979645/SRR1979645_1.fastq.gz	ftp://ftp.sra.ebi.ac.uk/vol1/fastq/SRR197/005/SRR1979645/SRR1979645_2.fastq.gz	source_name: backfat || breed: Italian Large White || gender: male || phenotype: castrated || tissue: backfat || age: 241 days || weight: 150-160 kg	backfat	Italian Large White	241 days	male
232	SRS912944	Sus scrofa	PRJNA281483	SRR1979644	SRX998810	RNA-Seq	cDNA	TRANSCRIPTOMIC	PAIRED	80.94	202	ILLUMINA	Illumina HiSeq 2000	https://sra-download.ncbi.nlm.nih.gov/traces/sra27/SRR/001933/SRR1979644	ftp://ftp.sra.ebi.ac.uk/vol1/fastq/SRR197/004/SRR1979644/SRR1979644_1.fastq.gz	ftp://ftp.sra.ebi.ac.uk/vol1/fastq/SRR197/004/SRR1979644/SRR1979644_2.fastq.gz	source_name: backfat || breed: Italian Large White || gender: female || tissue: backfat || age: 244 days || weight: 150-160 kg	backfat	Italian Large White	244 days	female
233	SRS912945	Sus scrofa	PRJNA281483	SRR1979643	SRX998809	RNA-Seq	cDNA	TRANSCRIPTOMIC	PAIRED	103.78	202	ILLUMINA	Illumina HiSeq 2000	https://sra-download.ncbi.nlm.nih.gov/traces/sra27/SRR/001933/SRR1979643	ftp://ftp.sra.ebi.ac.uk/vol1/fastq/SRR197/003/SRR1979643/SRR1979643_1.fastq.gz	ftp://ftp.sra.ebi.ac.uk/vol1/fastq/SRR197/003/SRR1979643/SRR1979643_2.fastq.gz	source_name: backfat || breed: Italian Large White || gender: male || phenotype: castrated || tissue: backfat || age: 241 days || weight: 150-160 kg	backfat	Italian Large White	241 days	male
234	SRS912946	Sus scrofa	PRJNA281483	SRR1979642	SRX998808	RNA-Seq	cDNA	TRANSCRIPTOMIC	PAIRED	104.43	202	ILLUMINA	Illumina HiSeq 2000	https://sra-download.ncbi.nlm.nih.gov/traces/sra27/SRR/001933/SRR1979642	ftp://ftp.sra.ebi.ac.uk/vol1/fastq/SRR197/002/SRR1979642/SRR1979642_1.fastq.gz	ftp://ftp.sra.ebi.ac.uk/vol1/fastq/SRR197/002/SRR1979642/SRR1979642_2.fastq.gz	source_name: backfat || breed: Italian Large White || gender: female || tissue: backfat || age: 249 days || weight: 150-160 kg	backfat	Italian Large White	249 days	female
235	SRS912947	Sus scrofa	PRJNA281483	SRR1979641	SRX998807	RNA-Seq	cDNA	TRANSCRIPTOMIC	PAIRED	98.61	202	ILLUMINA	Illumina HiSeq 2000	https://sra-download.ncbi.nlm.nih.gov/traces/sra27/SRR/001933/SRR1979641	ftp://ftp.sra.ebi.ac.uk/vol1/fastq/SRR197/001/SRR1979641/SRR1979641_1.fastq.gz	ftp://ftp.sra.ebi.ac.uk/vol1/fastq/SRR197/001/SRR1979641/SRR1979641_2.fastq.gz	source_name: backfat || breed: Italian Large White || gender: female || tissue: backfat || age: 249 days || weight: 150-160 kg	backfat	Italian Large White	249 days	female
236	SRS912948	Sus scrofa	PRJNA281483	SRR1979640	SRX998806	RNA-Seq	cDNA	TRANSCRIPTOMIC	PAIRED	100.64	202	ILLUMINA	Illumina HiSeq 2000	https://sra-download.ncbi.nlm.nih.gov/traces/sra27/SRR/001933/SRR1979640	ftp://ftp.sra.ebi.ac.uk/vol1/fastq/SRR197/000/SRR1979640/SRR1979640_1.fastq.gz	ftp://ftp.sra.ebi.ac.uk/vol1/fastq/SRR197/000/SRR1979640/SRR1979640_2.fastq.gz	source_name: backfat || breed: Italian Large White || gender: male || phenotype: castrated || tissue: backfat || age: 241 days || weight: 150-160 kg	backfat	Italian Large White	241 days	male
237	SRS912949	Sus scrofa	PRJNA281483	SRR1979639	SRX998805	RNA-Seq	cDNA	TRANSCRIPTOMIC	PAIRED	93.44	202	ILLUMINA	Illumina HiSeq 2000	https://sra-download.ncbi.nlm.nih.gov/traces/sra27/SRR/001933/SRR1979639	ftp://ftp.sra.ebi.ac.uk/vol1/fastq/SRR197/009/SRR1979639/SRR1979639_1.fastq.gz	ftp://ftp.sra.ebi.ac.uk/vol1/fastq/SRR197/009/SRR1979639/SRR1979639_2.fastq.gz	source_name: backfat || breed: Italian Large White || gender: female || tissue: backfat || age: 250 days || weight: 150-160 kg	backfat	Italian Large White	250 days	female
238	SRS912950	Sus scrofa	PRJNA281483	SRR1979638	SRX998804	RNA-Seq	cDNA	TRANSCRIPTOMIC	PAIRED	108.57	202	ILLUMINA	Illumina HiSeq 2000	https://sra-download.ncbi.nlm.nih.gov/traces/sra27/SRR/001933/SRR1979638	ftp://ftp.sra.ebi.ac.uk/vol1/fastq/SRR197/008/SRR1979638/SRR1979638_1.fastq.gz	ftp://ftp.sra.ebi.ac.uk/vol1/fastq/SRR197/008/SRR1979638/SRR1979638_2.fastq.gz	source_name: backfat || breed: Italian Large White || gender: female || tissue: backfat || age: 237 days || weight: 150-160 kg	backfat	Italian Large White	237 days	female
239	SRS912951	Sus scrofa	PRJNA281483	SRR1979637	SRX998803	RNA-Seq	cDNA	TRANSCRIPTOMIC	PAIRED	94.95	202	ILLUMINA	Illumina HiSeq 2000	https://sra-download.ncbi.nlm.nih.gov/traces/sra27/SRR/001933/SRR1979637	ftp://ftp.sra.ebi.ac.uk/vol1/fastq/SRR197/007/SRR1979637/SRR1979637_1.fastq.gz	ftp://ftp.sra.ebi.ac.uk/vol1/fastq/SRR197/007/SRR1979637/SRR1979637_2.fastq.gz	source_name: backfat || breed: Italian Large White || gender: male || phenotype: castrated || tissue: backfat || age: 249 days || weight: 150-160 kg	backfat	Italian Large White	249 days	male
240	SRS912952	Sus scrofa	PRJNA281483	SRR1979636	SRX998802	RNA-Seq	cDNA	TRANSCRIPTOMIC	PAIRED	100.57	202	ILLUMINA	Illumina HiSeq 2000	https://sra-download.ncbi.nlm.nih.gov/traces/sra27/SRR/001933/SRR1979636	ftp://ftp.sra.ebi.ac.uk/vol1/fastq/SRR197/006/SRR1979636/SRR1979636_1.fastq.gz	ftp://ftp.sra.ebi.ac.uk/vol1/fastq/SRR197/006/SRR1979636/SRR1979636_2.fastq.gz	source_name: backfat || breed: Italian Large White || gender: female || tissue: backfat || age: 243 days || weight: 150-160 kg	backfat	Italian Large White	243 days	female
241	SRS912953	Sus scrofa	PRJNA281483	SRR1979635	SRX998801	RNA-Seq	cDNA	TRANSCRIPTOMIC	PAIRED	96.01	202	ILLUMINA	Illumina HiSeq 2000	https://sra-download.ncbi.nlm.nih.gov/traces/sra27/SRR/001933/SRR1979635	ftp://ftp.sra.ebi.ac.uk/vol1/fastq/SRR197/005/SRR1979635/SRR1979635_1.fastq.gz	ftp://ftp.sra.ebi.ac.uk/vol1/fastq/SRR197/005/SRR1979635/SRR1979635_2.fastq.gz	source_name: backfat || breed: Italian Large White || gender: male || phenotype: castrated || tissue: backfat || age: 243 days || weight: 150-160 kg	backfat	Italian Large White	243 days	male
242	SRS912954	Sus scrofa	PRJNA281483	SRR1979634	SRX998800	RNA-Seq	cDNA	TRANSCRIPTOMIC	PAIRED	113.11	202	ILLUMINA	Illumina HiSeq 2000	https://sra-download.ncbi.nlm.nih.gov/traces/sra27/SRR/001933/SRR1979634	ftp://ftp.sra.ebi.ac.uk/vol1/fastq/SRR197/004/SRR1979634/SRR1979634_1.fastq.gz	ftp://ftp.sra.ebi.ac.uk/vol1/fastq/SRR197/004/SRR1979634/SRR1979634_2.fastq.gz	source_name: backfat || breed: Italian Large White || gender: female || tissue: backfat || age: 239 days || weight: 150-160 kg	backfat	Italian Large White	239 days	female
243	SRS912955	Sus scrofa	PRJNA281483	SRR1979633	SRX998799	RNA-Seq	cDNA	TRANSCRIPTOMIC	PAIRED	96.01	202	ILLUMINA	Illumina HiSeq 2000	https://sra-download.ncbi.nlm.nih.gov/traces/sra27/SRR/001933/SRR1979633	ftp://ftp.sra.ebi.ac.uk/vol1/fastq/SRR197/003/SRR1979633/SRR1979633_1.fastq.gz	ftp://ftp.sra.ebi.ac.uk/vol1/fastq/SRR197/003/SRR1979633/SRR1979633_2.fastq.gz	source_name: backfat || breed: Italian Large White || gender: male || phenotype: castrated || tissue: backfat || age: 243 days || weight: 150-160 kg	backfat	Italian Large White	243 days	male
244	SRS912956	Sus scrofa	PRJNA281483	SRR1979632	SRX998798	RNA-Seq	cDNA	TRANSCRIPTOMIC	PAIRED	84.81	202	ILLUMINA	Illumina HiSeq 2000	https://sra-download.ncbi.nlm.nih.gov/traces/sra27/SRR/001933/SRR1979632	ftp://ftp.sra.ebi.ac.uk/vol1/fastq/SRR197/002/SRR1979632/SRR1979632_1.fastq.gz	ftp://ftp.sra.ebi.ac.uk/vol1/fastq/SRR197/002/SRR1979632/SRR1979632_2.fastq.gz	source_name: backfat || breed: Italian Large White || gender: female || tissue: backfat || age: 235 days || weight: 150-160 kg	backfat	Italian Large White	235 days	female
245	SRS912957	Sus scrofa	PRJNA281483	SRR1979631	SRX998797	RNA-Seq	cDNA	TRANSCRIPTOMIC	PAIRED	82.69	202	ILLUMINA	Illumina HiSeq 2000	https://sra-download.ncbi.nlm.nih.gov/traces/sra27/SRR/001933/SRR1979631	ftp://ftp.sra.ebi.ac.uk/vol1/fastq/SRR197/001/SRR1979631/SRR1979631_1.fastq.gz	ftp://ftp.sra.ebi.ac.uk/vol1/fastq/SRR197/001/SRR1979631/SRR1979631_2.fastq.gz	source_name: backfat || breed: Italian Large White || gender: male || phenotype: castrated || tissue: backfat || age: 233 days || weight: 150-160 kg	backfat	Italian Large White	233 days	male
246	SRS912958	Sus scrofa	PRJNA281483	SRR1979630	SRX998796	RNA-Seq	cDNA	TRANSCRIPTOMIC	PAIRED	90.09	202	ILLUMINA	Illumina HiSeq 2000	https://sra-download.ncbi.nlm.nih.gov/traces/sra27/SRR/001933/SRR1979630	ftp://ftp.sra.ebi.ac.uk/vol1/fastq/SRR197/000/SRR1979630/SRR1979630_1.fastq.gz	ftp://ftp.sra.ebi.ac.uk/vol1/fastq/SRR197/000/SRR1979630/SRR1979630_2.fastq.gz	source_name: backfat || breed: Italian Large White || gender: male || phenotype: castrated || tissue: backfat || age: 237 days || weight: 150-160 kg	backfat	Italian Large White	237 days	male
247	SRS912959	Sus scrofa	PRJNA281483	SRR1979629	SRX998795	RNA-Seq	cDNA	TRANSCRIPTOMIC	PAIRED	124.67	202	ILLUMINA	Illumina HiSeq 2000	https://sra-download.ncbi.nlm.nih.gov/traces/sra27/SRR/001933/SRR1979629	ftp://ftp.sra.ebi.ac.uk/vol1/fastq/SRR197/009/SRR1979629/SRR1979629_1.fastq.gz	ftp://ftp.sra.ebi.ac.uk/vol1/fastq/SRR197/009/SRR1979629/SRR1979629_2.fastq.gz	source_name: backfat || breed: Italian Large White || gender: female || tissue: backfat || age: 247 days || weight: 150-160 kg	backfat	Italian Large White	247 days	female
248	SRS938493	Sus scrofa	PRJNA284205	SRR2029653	SRX1030178	RNA-Seq	cDNA	TRANSCRIPTOMIC	PAIRED	39.74	160	ILLUMINA	Illumina Genome Analyzer II	https://sra-download.ncbi.nlm.nih.gov/traces/sra22/SRR/001982/SRR2029653	ftp://ftp.sra.ebi.ac.uk/vol1/fastq/SRR202/003/SRR2029653/SRR2029653_1.fastq.gz	ftp://ftp.sra.ebi.ac.uk/vol1/fastq/SRR202/003/SRR2029653/SRR2029653_2.fastq.gz	source_name: lungs || hp-prrsv infection: 7 dpi || tissue: lung || age: 35 days old || breed: Landrace || genotype: WT type	lung	Landrace	35 days old	unknown
249	SRS938494	Sus scrofa	PRJNA284205	SRR2029652	SRX1030177	RNA-Seq	cDNA	TRANSCRIPTOMIC	PAIRED	38.4	162	ILLUMINA	Illumina Genome Analyzer II	https://sra-download.ncbi.nlm.nih.gov/traces/sra26/SRR/001982/SRR2029652	ftp://ftp.sra.ebi.ac.uk/vol1/fastq/SRR202/002/SRR2029652/SRR2029652_1.fastq.gz	ftp://ftp.sra.ebi.ac.uk/vol1/fastq/SRR202/002/SRR2029652/SRR2029652_2.fastq.gz	source_name: lungs || hp-prrsv infection: 5 dpi || tissue: lung || age: 35 days old || breed: Landrace || genotype: WT type	lung	Landrace	35 days old	unknown
250	SRS938495	Sus scrofa	PRJNA284205	SRR2029651	SRX1030176	RNA-Seq	cDNA	TRANSCRIPTOMIC	PAIRED	37.07	162	ILLUMINA	Illumina Genome Analyzer II	https://sra-download.ncbi.nlm.nih.gov/traces/sra26/SRR/001982/SRR2029651	ftp://ftp.sra.ebi.ac.uk/vol1/fastq/SRR202/001/SRR2029651/SRR2029651_1.fastq.gz	ftp://ftp.sra.ebi.ac.uk/vol1/fastq/SRR202/001/SRR2029651/SRR2029651_2.fastq.gz	source_name: lungs || hp-prrsv infection: 3 dpi || tissue: lung || age: 35 days old || breed: Landrace || genotype: WT type	lung	Landrace	35 days old	unknown
251	SRS938496	Sus scrofa	PRJNA284205	SRR2029650	SRX1030175	RNA-Seq	cDNA	TRANSCRIPTOMIC	PAIRED	24.93	162	ILLUMINA	Illumina Genome Analyzer II	https://sra-download.ncbi.nlm.nih.gov/traces/sra26/SRR/001982/SRR2029650	ftp://ftp.sra.ebi.ac.uk/vol1/fastq/SRR202/000/SRR2029650/SRR2029650_1.fastq.gz	ftp://ftp.sra.ebi.ac.uk/vol1/fastq/SRR202/000/SRR2029650/SRR2029650_2.fastq.gz	source_name: lungs || hp-prrsv infection: 0 dpi || tissue: lung || age: 35 days old || breed: Landrace || genotype: WT type	lung	Landrace	35 days old	unknown
252	SRS938497	Sus scrofa	PRJNA284205	SRR2029649	SRX1030174	RNA-Seq	cDNA	TRANSCRIPTOMIC	PAIRED	40	160	ILLUMINA	Illumina Genome Analyzer II	https://sra-download.ncbi.nlm.nih.gov/traces/sra27/SRR/001982/SRR2029649	ftp://ftp.sra.ebi.ac.uk/vol1/fastq/SRR202/009/SRR2029649/SRR2029649_1.fastq.gz	ftp://ftp.sra.ebi.ac.uk/vol1/fastq/SRR202/009/SRR2029649/SRR2029649_2.fastq.gz	source_name: lungs || hp-prrsv infection: 7 dpi || tissue: lung || age: 35 days old || breed: Tongcheng || genotype: WT type	lung	Tongcheng	35 days old	unknown
253	SRS938498	Sus scrofa	PRJNA284205	SRR2029648	SRX1030173	RNA-Seq	cDNA	TRANSCRIPTOMIC	PAIRED	40.4	162	ILLUMINA	Illumina Genome Analyzer II	https://sra-download.ncbi.nlm.nih.gov/traces/sra28/SRR/001982/SRR2029648	ftp://ftp.sra.ebi.ac.uk/vol1/fastq/SRR202/008/SRR2029648/SRR2029648_1.fastq.gz	ftp://ftp.sra.ebi.ac.uk/vol1/fastq/SRR202/008/SRR2029648/SRR2029648_2.fastq.gz	source_name: lungs || hp-prrsv infection: 5 dpi || tissue: lung || age: 35 days old || breed: Tongcheng || genotype: WT type	lung	Tongcheng	35 days old	unknown
254	SRS938499	Sus scrofa	PRJNA284205	SRR2029647	SRX1030172	RNA-Seq	cDNA	TRANSCRIPTOMIC	PAIRED	39.09	162	ILLUMINA	Illumina Genome Analyzer II	https://sra-download.ncbi.nlm.nih.gov/traces/sra27/SRR/001982/SRR2029647	ftp://ftp.sra.ebi.ac.uk/vol1/fastq/SRR202/007/SRR2029647/SRR2029647_1.fastq.gz	ftp://ftp.sra.ebi.ac.uk/vol1/fastq/SRR202/007/SRR2029647/SRR2029647_2.fastq.gz	source_name: lungs || hp-prrsv infection: 3 dpi || tissue: lung || age: 35 days old || breed: Tongcheng || genotype: WT type	lung	Tongcheng	35 days old	unknown
255	SRS938500	Sus scrofa	PRJNA284205	SRR2029646	SRX1030171	RNA-Seq	cDNA	TRANSCRIPTOMIC	PAIRED	21.71	162	ILLUMINA	Illumina Genome Analyzer II	https://sra-download.ncbi.nlm.nih.gov/traces/sra27/SRR/001982/SRR2029646	ftp://ftp.sra.ebi.ac.uk/vol1/fastq/SRR202/006/SRR2029646/SRR2029646_1.fastq.gz	ftp://ftp.sra.ebi.ac.uk/vol1/fastq/SRR202/006/SRR2029646/SRR2029646_2.fastq.gz	source_name: lungs || hp-prrsv infection: 0 dpi || tissue: lung || age: 35 days old || breed: Tongcheng || genotype: WT type	lung	Tongcheng	35 days old	unknown
256	SRS986719	Sus scrofa	PRJNA289358	SRR2095546	SRX1091046	RNA-Seq	cDNA	TRANSCRIPTOMIC	PAIRED	15.38	250	ILLUMINA	Illumina HiSeq 2500	https://sra-download.ncbi.nlm.nih.gov/traces/sra31/SRR/002046/SRR2095546	ftp://ftp.sra.ebi.ac.uk/vol1/fastq/SRR209/006/SRR2095546/SRR2095546_1.fastq.gz	ftp://ftp.sra.ebi.ac.uk/vol1/fastq/SRR209/006/SRR2095546/SRR2095546_2.fastq.gz	source_name: longissimus dorsi muscle || tissue: longissimus dorsi muscle || Stage: lean-type pig breeds	longissimus dorsi muscle	unknown	lean-type pig breeds	unknown
257	SRS986720	Sus scrofa	PRJNA289358	SRR2095545	SRX1091045	RNA-Seq	cDNA	TRANSCRIPTOMIC	PAIRED	17.97	250	ILLUMINA	Illumina HiSeq 2500	https://sra-download.ncbi.nlm.nih.gov/traces/sra31/SRR/002046/SRR2095545	ftp://ftp.sra.ebi.ac.uk/vol1/fastq/SRR209/005/SRR2095545/SRR2095545_1.fastq.gz	ftp://ftp.sra.ebi.ac.uk/vol1/fastq/SRR209/005/SRR2095545/SRR2095545_2.fastq.gz	source_name: longissimus dorsi muscle || tissue: longissimus dorsi muscle || Stage: Chinese indigenous pig breeds	longissimus dorsi muscle	unknown	Chinese indigenous pig breeds	unknown
258	SRS1009012	Sus scrofa	PRJNA290579	SRR2123949	SRX1115527	RNA-Seq	cDNA	TRANSCRIPTOMIC	PAIRED	21.63	200	ILLUMINA	Illumina HiSeq 2000	https://sra-download.ncbi.nlm.nih.gov/traces/sra32/SRR/002074/SRR2123949	ftp://ftp.sra.ebi.ac.uk/vol1/fastq/SRR212/009/SRR2123949/SRR2123949_1.fastq.gz	ftp://ftp.sra.ebi.ac.uk/vol1/fastq/SRR212/009/SRR2123949/SRR2123949_2.fastq.gz	source_name: uterine endometrium || infection status: UNINF || tissue: uterine endometrium	uterine endometrium	unknown	unknown	unknown
259	SRS1009013	Sus scrofa	PRJNA290579	SRR2123979	SRX1115557	RNA-Seq	cDNA	TRANSCRIPTOMIC	PAIRED	36.09	200	ILLUMINA	Illumina HiSeq 2000	https://sra-download.ncbi.nlm.nih.gov/traces/sra32/SRR/002074/SRR2123979	ftp://ftp.sra.ebi.ac.uk/vol1/fastq/SRR212/009/SRR2123979/SRR2123979_1.fastq.gz	ftp://ftp.sra.ebi.ac.uk/vol1/fastq/SRR212/009/SRR2123979/SRR2123979_2.fastq.gz	source_name: uterine endometrium || infection status: MEC || tissue: uterine endometrium	uterine endometrium	unknown	unknown	unknown
260	SRS1009014	Sus scrofa	PRJNA290579	SRR2123961	SRX1115539	RNA-Seq	cDNA	TRANSCRIPTOMIC	PAIRED	24.38	200	ILLUMINA	Illumina HiSeq 2000	https://sra-download.ncbi.nlm.nih.gov/traces/sra32/SRR/002074/SRR2123961	ftp://ftp.sra.ebi.ac.uk/vol1/fastq/SRR212/001/SRR2123961/SRR2123961_1.fastq.gz	ftp://ftp.sra.ebi.ac.uk/vol1/fastq/SRR212/001/SRR2123961/SRR2123961_2.fastq.gz	source_name: uterine endometrium || infection status: INF || tissue: uterine endometrium	uterine endometrium	unknown	unknown	unknown
261	SRS1009015	Sus scrofa	PRJNA290579	SRR2123976	SRX1115554	RNA-Seq	cDNA	TRANSCRIPTOMIC	PAIRED	34.27	200	ILLUMINA	Illumina HiSeq 2000	https://sra-download.ncbi.nlm.nih.gov/traces/sra32/SRR/002074/SRR2123976	ftp://ftp.sra.ebi.ac.uk/vol1/fastq/SRR212/006/SRR2123976/SRR2123976_1.fastq.gz	ftp://ftp.sra.ebi.ac.uk/vol1/fastq/SRR212/006/SRR2123976/SRR2123976_2.fastq.gz	source_name: uterine endometrium || infection status: MEC || tissue: uterine endometrium	uterine endometrium	unknown	unknown	unknown
262	SRS1009016	Sus scrofa	PRJNA290579	SRR2123980	SRX1115558	RNA-Seq	cDNA	TRANSCRIPTOMIC	PAIRED	27.55	200	ILLUMINA	Illumina HiSeq 2000	https://sra-download.ncbi.nlm.nih.gov/traces/sra32/SRR/002074/SRR2123980	ftp://ftp.sra.ebi.ac.uk/vol1/fastq/SRR212/000/SRR2123980/SRR2123980_1.fastq.gz	ftp://ftp.sra.ebi.ac.uk/vol1/fastq/SRR212/000/SRR2123980/SRR2123980_2.fastq.gz	source_name: uterine endometrium || infection status: MEC || tissue: uterine endometrium	uterine endometrium	unknown	unknown	unknown
263	SRS1009017	Sus scrofa	PRJNA290579	SRR2123978	SRX1115556	RNA-Seq	cDNA	TRANSCRIPTOMIC	PAIRED	33.95	200	ILLUMINA	Illumina HiSeq 2000	https://sra-download.ncbi.nlm.nih.gov/traces/sra32/SRR/002074/SRR2123978	ftp://ftp.sra.ebi.ac.uk/vol1/fastq/SRR212/008/SRR2123978/SRR2123978_1.fastq.gz	ftp://ftp.sra.ebi.ac.uk/vol1/fastq/SRR212/008/SRR2123978/SRR2123978_2.fastq.gz	source_name: uterine endometrium || infection status: MEC || tissue: uterine endometrium	uterine endometrium	unknown	unknown	unknown
264	SRS1009018	Sus scrofa	PRJNA290579	SRR2123977	SRX1115555	RNA-Seq	cDNA	TRANSCRIPTOMIC	PAIRED	36.82	200	ILLUMINA	Illumina HiSeq 2000	https://sra-download.ncbi.nlm.nih.gov/traces/sra32/SRR/002074/SRR2123977	ftp://ftp.sra.ebi.ac.uk/vol1/fastq/SRR212/007/SRR2123977/SRR2123977_1.fastq.gz	ftp://ftp.sra.ebi.ac.uk/vol1/fastq/SRR212/007/SRR2123977/SRR2123977_2.fastq.gz	source_name: uterine endometrium || infection status: MEC || tissue: uterine endometrium	uterine endometrium	unknown	unknown	unknown
265	SRS1009019	Sus scrofa	PRJNA290579	SRR2123975	SRX1115553	RNA-Seq	cDNA	TRANSCRIPTOMIC	PAIRED	28.1	200	ILLUMINA	Illumina HiSeq 2000	https://sra-download.ncbi.nlm.nih.gov/traces/sra32/SRR/002074/SRR2123975	ftp://ftp.sra.ebi.ac.uk/vol1/fastq/SRR212/005/SRR2123975/SRR2123975_1.fastq.gz	ftp://ftp.sra.ebi.ac.uk/vol1/fastq/SRR212/005/SRR2123975/SRR2123975_2.fastq.gz	source_name: uterine endometrium || infection status: MEC || tissue: uterine endometrium	uterine endometrium	unknown	unknown	unknown
266	SRS1009020	Sus scrofa	PRJNA290579	SRR2123974	SRX1115552	RNA-Seq	cDNA	TRANSCRIPTOMIC	PAIRED	24.48	200	ILLUMINA	Illumina HiSeq 2000	https://sra-download.ncbi.nlm.nih.gov/traces/sra32/SRR/002074/SRR2123974	ftp://ftp.sra.ebi.ac.uk/vol1/fastq/SRR212/004/SRR2123974/SRR2123974_1.fastq.gz	ftp://ftp.sra.ebi.ac.uk/vol1/fastq/SRR212/004/SRR2123974/SRR2123974_2.fastq.gz	source_name: uterine endometrium || infection status: MEC || tissue: uterine endometrium	uterine endometrium	unknown	unknown	unknown
267	SRS1009021	Sus scrofa	PRJNA290579	SRR2123973	SRX1115551	RNA-Seq	cDNA	TRANSCRIPTOMIC	PAIRED	32.38	200	ILLUMINA	Illumina HiSeq 2000	https://sra-download.ncbi.nlm.nih.gov/traces/sra32/SRR/002074/SRR2123973	ftp://ftp.sra.ebi.ac.uk/vol1/fastq/SRR212/003/SRR2123973/SRR2123973_1.fastq.gz	ftp://ftp.sra.ebi.ac.uk/vol1/fastq/SRR212/003/SRR2123973/SRR2123973_2.fastq.gz	source_name: uterine endometrium || infection status: MEC || tissue: uterine endometrium	uterine endometrium	unknown	unknown	unknown
268	SRS1009022	Sus scrofa	PRJNA290579	SRR2123972	SRX1115550	RNA-Seq	cDNA	TRANSCRIPTOMIC	PAIRED	26.29	200	ILLUMINA	Illumina HiSeq 2000	https://sra-download.ncbi.nlm.nih.gov/traces/sra32/SRR/002074/SRR2123972	ftp://ftp.sra.ebi.ac.uk/vol1/fastq/SRR212/002/SRR2123972/SRR2123972_1.fastq.gz	ftp://ftp.sra.ebi.ac.uk/vol1/fastq/SRR212/002/SRR2123972/SRR2123972_2.fastq.gz	source_name: uterine endometrium || infection status: MEC || tissue: uterine endometrium	uterine endometrium	unknown	unknown	unknown
269	SRS1009023	Sus scrofa	PRJNA290579	SRR2123971	SRX1115549	RNA-Seq	cDNA	TRANSCRIPTOMIC	PAIRED	26.06	200	ILLUMINA	Illumina HiSeq 2000	https://sra-download.ncbi.nlm.nih.gov/traces/sra32/SRR/002074/SRR2123971	ftp://ftp.sra.ebi.ac.uk/vol1/fastq/SRR212/001/SRR2123971/SRR2123971_1.fastq.gz	ftp://ftp.sra.ebi.ac.uk/vol1/fastq/SRR212/001/SRR2123971/SRR2123971_2.fastq.gz	source_name: uterine endometrium || infection status: MEC || tissue: uterine endometrium	uterine endometrium	unknown	unknown	unknown
270	SRS1009024	Sus scrofa	PRJNA290579	SRR2123970	SRX1115548	RNA-Seq	cDNA	TRANSCRIPTOMIC	PAIRED	27.98	200	ILLUMINA	Illumina HiSeq 2000	https://sra-download.ncbi.nlm.nih.gov/traces/sra32/SRR/002074/SRR2123970	ftp://ftp.sra.ebi.ac.uk/vol1/fastq/SRR212/000/SRR2123970/SRR2123970_1.fastq.gz	ftp://ftp.sra.ebi.ac.uk/vol1/fastq/SRR212/000/SRR2123970/SRR2123970_2.fastq.gz	source_name: uterine endometrium || infection status: MEC || tissue: uterine endometrium	uterine endometrium	unknown	unknown	unknown
271	SRS1009025	Sus scrofa	PRJNA290579	SRR2123969	SRX1115547	RNA-Seq	cDNA	TRANSCRIPTOMIC	PAIRED	33.76	200	ILLUMINA	Illumina HiSeq 2000	https://sra-download.ncbi.nlm.nih.gov/traces/sra32/SRR/002074/SRR2123969	ftp://ftp.sra.ebi.ac.uk/vol1/fastq/SRR212/009/SRR2123969/SRR2123969_1.fastq.gz	ftp://ftp.sra.ebi.ac.uk/vol1/fastq/SRR212/009/SRR2123969/SRR2123969_2.fastq.gz	source_name: uterine endometrium || infection status: MEC || tissue: uterine endometrium	uterine endometrium	unknown	unknown	unknown
272	SRS1009026	Sus scrofa	PRJNA290579	SRR2123967	SRX1115545	RNA-Seq	cDNA	TRANSCRIPTOMIC	PAIRED	24.96	200	ILLUMINA	Illumina HiSeq 2000	https://sra-download.ncbi.nlm.nih.gov/traces/sra32/SRR/002074/SRR2123967	ftp://ftp.sra.ebi.ac.uk/vol1/fastq/SRR212/007/SRR2123967/SRR2123967_1.fastq.gz	ftp://ftp.sra.ebi.ac.uk/vol1/fastq/SRR212/007/SRR2123967/SRR2123967_2.fastq.gz	source_name: uterine endometrium || infection status: INF || tissue: uterine endometrium	uterine endometrium	unknown	unknown	unknown
273	SRS1009027	Sus scrofa	PRJNA290579	SRR2123968	SRX1115546	RNA-Seq	cDNA	TRANSCRIPTOMIC	PAIRED	33.8	200	ILLUMINA	Illumina HiSeq 2000	https://sra-download.ncbi.nlm.nih.gov/traces/sra32/SRR/002074/SRR2123968	ftp://ftp.sra.ebi.ac.uk/vol1/fastq/SRR212/008/SRR2123968/SRR2123968_1.fastq.gz	ftp://ftp.sra.ebi.ac.uk/vol1/fastq/SRR212/008/SRR2123968/SRR2123968_2.fastq.gz	source_name: uterine endometrium || infection status: INF || tissue: uterine endometrium	uterine endometrium	unknown	unknown	unknown
274	SRS1009028	Sus scrofa	PRJNA290579	SRR2123966	SRX1115544	RNA-Seq	cDNA	TRANSCRIPTOMIC	PAIRED	36.28	200	ILLUMINA	Illumina HiSeq 2000	https://sra-download.ncbi.nlm.nih.gov/traces/sra32/SRR/002074/SRR2123966	ftp://ftp.sra.ebi.ac.uk/vol1/fastq/SRR212/006/SRR2123966/SRR2123966_1.fastq.gz	ftp://ftp.sra.ebi.ac.uk/vol1/fastq/SRR212/006/SRR2123966/SRR2123966_2.fastq.gz	source_name: uterine endometrium || infection status: INF || tissue: uterine endometrium	uterine endometrium	unknown	unknown	unknown
275	SRS1009029	Sus scrofa	PRJNA290579	SRR2123965	SRX1115543	RNA-Seq	cDNA	TRANSCRIPTOMIC	PAIRED	33.5	200	ILLUMINA	Illumina HiSeq 2000	https://sra-download.ncbi.nlm.nih.gov/traces/sra32/SRR/002074/SRR2123965	ftp://ftp.sra.ebi.ac.uk/vol1/fastq/SRR212/005/SRR2123965/SRR2123965_1.fastq.gz	ftp://ftp.sra.ebi.ac.uk/vol1/fastq/SRR212/005/SRR2123965/SRR2123965_2.fastq.gz	source_name: uterine endometrium || infection status: INF || tissue: uterine endometrium	uterine endometrium	unknown	unknown	unknown
276	SRS1009030	Sus scrofa	PRJNA290579	SRR2123963	SRX1115541	RNA-Seq	cDNA	TRANSCRIPTOMIC	PAIRED	27.17	200	ILLUMINA	Illumina HiSeq 2000	https://sra-download.ncbi.nlm.nih.gov/traces/sra32/SRR/002074/SRR2123963	ftp://ftp.sra.ebi.ac.uk/vol1/fastq/SRR212/003/SRR2123963/SRR2123963_1.fastq.gz	ftp://ftp.sra.ebi.ac.uk/vol1/fastq/SRR212/003/SRR2123963/SRR2123963_2.fastq.gz	source_name: uterine endometrium || infection status: INF || tissue: uterine endometrium	uterine endometrium	unknown	unknown	unknown
277	SRS1009031	Sus scrofa	PRJNA290579	SRR2123964	SRX1115542	RNA-Seq	cDNA	TRANSCRIPTOMIC	PAIRED	30.5	200	ILLUMINA	Illumina HiSeq 2000	https://sra-download.ncbi.nlm.nih.gov/traces/sra32/SRR/002074/SRR2123964	ftp://ftp.sra.ebi.ac.uk/vol1/fastq/SRR212/004/SRR2123964/SRR2123964_1.fastq.gz	ftp://ftp.sra.ebi.ac.uk/vol1/fastq/SRR212/004/SRR2123964/SRR2123964_2.fastq.gz	source_name: uterine endometrium || infection status: INF || tissue: uterine endometrium	uterine endometrium	unknown	unknown	unknown
278	SRS1009032	Sus scrofa	PRJNA290579	SRR2123962	SRX1115540	RNA-Seq	cDNA	TRANSCRIPTOMIC	PAIRED	27.55	200	ILLUMINA	Illumina HiSeq 2000	https://sra-download.ncbi.nlm.nih.gov/traces/sra32/SRR/002074/SRR2123962	ftp://ftp.sra.ebi.ac.uk/vol1/fastq/SRR212/002/SRR2123962/SRR2123962_1.fastq.gz	ftp://ftp.sra.ebi.ac.uk/vol1/fastq/SRR212/002/SRR2123962/SRR2123962_2.fastq.gz	source_name: uterine endometrium || infection status: INF || tissue: uterine endometrium	uterine endometrium	unknown	unknown	unknown
279	SRS1009033	Sus scrofa	PRJNA290579	SRR2123960	SRX1115538	RNA-Seq	cDNA	TRANSCRIPTOMIC	PAIRED	25.57	200	ILLUMINA	Illumina HiSeq 2000	https://sra-download.ncbi.nlm.nih.gov/traces/sra32/SRR/002074/SRR2123960	ftp://ftp.sra.ebi.ac.uk/vol1/fastq/SRR212/000/SRR2123960/SRR2123960_1.fastq.gz	ftp://ftp.sra.ebi.ac.uk/vol1/fastq/SRR212/000/SRR2123960/SRR2123960_2.fastq.gz	source_name: uterine endometrium || infection status: INF || tissue: uterine endometrium	uterine endometrium	unknown	unknown	unknown
280	SRS1009034	Sus scrofa	PRJNA290579	SRR2123959	SRX1115537	RNA-Seq	cDNA	TRANSCRIPTOMIC	PAIRED	27.73	200	ILLUMINA	Illumina HiSeq 2000	https://sra-download.ncbi.nlm.nih.gov/traces/sra32/SRR/002074/SRR2123959	ftp://ftp.sra.ebi.ac.uk/vol1/fastq/SRR212/009/SRR2123959/SRR2123959_1.fastq.gz	ftp://ftp.sra.ebi.ac.uk/vol1/fastq/SRR212/009/SRR2123959/SRR2123959_2.fastq.gz	source_name: uterine endometrium || infection status: INF || tissue: uterine endometrium	uterine endometrium	unknown	unknown	unknown
281	SRS1009035	Sus scrofa	PRJNA290579	SRR2123958	SRX1115536	RNA-Seq	cDNA	TRANSCRIPTOMIC	PAIRED	34.62	200	ILLUMINA	Illumina HiSeq 2000	https://sra-download.ncbi.nlm.nih.gov/traces/sra32/SRR/002074/SRR2123958	ftp://ftp.sra.ebi.ac.uk/vol1/fastq/SRR212/008/SRR2123958/SRR2123958_1.fastq.gz	ftp://ftp.sra.ebi.ac.uk/vol1/fastq/SRR212/008/SRR2123958/SRR2123958_2.fastq.gz	source_name: uterine endometrium || infection status: INF || tissue: uterine endometrium	uterine endometrium	unknown	unknown	unknown
282	SRS1009036	Sus scrofa	PRJNA290579	SRR2123957	SRX1115535	RNA-Seq	cDNA	TRANSCRIPTOMIC	PAIRED	28.25	200	ILLUMINA	Illumina HiSeq 2000	https://sra-download.ncbi.nlm.nih.gov/traces/sra32/SRR/002074/SRR2123957	ftp://ftp.sra.ebi.ac.uk/vol1/fastq/SRR212/007/SRR2123957/SRR2123957_1.fastq.gz	ftp://ftp.sra.ebi.ac.uk/vol1/fastq/SRR212/007/SRR2123957/SRR2123957_2.fastq.gz	source_name: uterine endometrium || infection status: INF || tissue: uterine endometrium	uterine endometrium	unknown	unknown	unknown
283	SRS1009037	Sus scrofa	PRJNA290579	SRR2123956	SRX1115534	RNA-Seq	cDNA	TRANSCRIPTOMIC	PAIRED	28.7	200	ILLUMINA	Illumina HiSeq 2000	https://sra-download.ncbi.nlm.nih.gov/traces/sra32/SRR/002074/SRR2123956	ftp://ftp.sra.ebi.ac.uk/vol1/fastq/SRR212/006/SRR2123956/SRR2123956_1.fastq.gz	ftp://ftp.sra.ebi.ac.uk/vol1/fastq/SRR212/006/SRR2123956/SRR2123956_2.fastq.gz	source_name: uterine endometrium || infection status: UNINF || tissue: uterine endometrium	uterine endometrium	unknown	unknown	unknown
284	SRS1009038	Sus scrofa	PRJNA290579	SRR2123955	SRX1115533	RNA-Seq	cDNA	TRANSCRIPTOMIC	PAIRED	24.92	200	ILLUMINA	Illumina HiSeq 2000	https://sra-download.ncbi.nlm.nih.gov/traces/sra32/SRR/002074/SRR2123955	ftp://ftp.sra.ebi.ac.uk/vol1/fastq/SRR212/005/SRR2123955/SRR2123955_1.fastq.gz	ftp://ftp.sra.ebi.ac.uk/vol1/fastq/SRR212/005/SRR2123955/SRR2123955_2.fastq.gz	source_name: uterine endometrium || infection status: UNINF || tissue: uterine endometrium	uterine endometrium	unknown	unknown	unknown
285	SRS1009039	Sus scrofa	PRJNA290579	SRR2123954	SRX1115532	RNA-Seq	cDNA	TRANSCRIPTOMIC	PAIRED	34.33	200	ILLUMINA	Illumina HiSeq 2000	https://sra-download.ncbi.nlm.nih.gov/traces/sra32/SRR/002074/SRR2123954	ftp://ftp.sra.ebi.ac.uk/vol1/fastq/SRR212/004/SRR2123954/SRR2123954_1.fastq.gz	ftp://ftp.sra.ebi.ac.uk/vol1/fastq/SRR212/004/SRR2123954/SRR2123954_2.fastq.gz	source_name: uterine endometrium || infection status: UNINF || tissue: uterine endometrium	uterine endometrium	unknown	unknown	unknown
286	SRS1009040	Sus scrofa	PRJNA290579	SRR2123953	SRX1115531	RNA-Seq	cDNA	TRANSCRIPTOMIC	PAIRED	27.37	200	ILLUMINA	Illumina HiSeq 2000	https://sra-download.ncbi.nlm.nih.gov/traces/sra32/SRR/002074/SRR2123953	ftp://ftp.sra.ebi.ac.uk/vol1/fastq/SRR212/003/SRR2123953/SRR2123953_1.fastq.gz	ftp://ftp.sra.ebi.ac.uk/vol1/fastq/SRR212/003/SRR2123953/SRR2123953_2.fastq.gz	source_name: uterine endometrium || infection status: UNINF || tissue: uterine endometrium	uterine endometrium	unknown	unknown	unknown
287	SRS1009041	Sus scrofa	PRJNA290579	SRR2123952	SRX1115530	RNA-Seq	cDNA	TRANSCRIPTOMIC	PAIRED	28.44	200	ILLUMINA	Illumina HiSeq 2000	https://sra-download.ncbi.nlm.nih.gov/traces/sra32/SRR/002074/SRR2123952	ftp://ftp.sra.ebi.ac.uk/vol1/fastq/SRR212/002/SRR2123952/SRR2123952_1.fastq.gz	ftp://ftp.sra.ebi.ac.uk/vol1/fastq/SRR212/002/SRR2123952/SRR2123952_2.fastq.gz	source_name: uterine endometrium || infection status: UNINF || tissue: uterine endometrium	uterine endometrium	unknown	unknown	unknown
288	SRS1009042	Sus scrofa	PRJNA290579	SRR2123951	SRX1115529	RNA-Seq	cDNA	TRANSCRIPTOMIC	PAIRED	34.01	200	ILLUMINA	Illumina HiSeq 2000	https://sra-download.ncbi.nlm.nih.gov/traces/sra32/SRR/002074/SRR2123951	ftp://ftp.sra.ebi.ac.uk/vol1/fastq/SRR212/001/SRR2123951/SRR2123951_1.fastq.gz	ftp://ftp.sra.ebi.ac.uk/vol1/fastq/SRR212/001/SRR2123951/SRR2123951_2.fastq.gz	source_name: uterine endometrium || infection status: UNINF || tissue: uterine endometrium	uterine endometrium	unknown	unknown	unknown
289	SRS1009043	Sus scrofa	PRJNA290579	SRR2123948	SRX1115526	RNA-Seq	cDNA	TRANSCRIPTOMIC	PAIRED	36.38	200	ILLUMINA	Illumina HiSeq 2000	https://sra-download.ncbi.nlm.nih.gov/traces/sra32/SRR/002074/SRR2123948	ftp://ftp.sra.ebi.ac.uk/vol1/fastq/SRR212/008/SRR2123948/SRR2123948_1.fastq.gz	ftp://ftp.sra.ebi.ac.uk/vol1/fastq/SRR212/008/SRR2123948/SRR2123948_2.fastq.gz	source_name: uterine endometrium || infection status: UNINF || tissue: uterine endometrium	uterine endometrium	unknown	unknown	unknown
290	SRS1009044	Sus scrofa	PRJNA290579	SRR2123950	SRX1115528	RNA-Seq	cDNA	TRANSCRIPTOMIC	PAIRED	21.5	200	ILLUMINA	Illumina HiSeq 2000	https://sra-download.ncbi.nlm.nih.gov/traces/sra32/SRR/002074/SRR2123950	ftp://ftp.sra.ebi.ac.uk/vol1/fastq/SRR212/000/SRR2123950/SRR2123950_1.fastq.gz	ftp://ftp.sra.ebi.ac.uk/vol1/fastq/SRR212/000/SRR2123950/SRR2123950_2.fastq.gz	source_name: uterine endometrium || infection status: UNINF || tissue: uterine endometrium	uterine endometrium	unknown	unknown	unknown
291	SRS1009045	Sus scrofa	PRJNA290579	SRR2123947	SRX1115525	RNA-Seq	cDNA	TRANSCRIPTOMIC	PAIRED	30.66	200	ILLUMINA	Illumina HiSeq 2000	https://sra-download.ncbi.nlm.nih.gov/traces/sra32/SRR/002074/SRR2123947	ftp://ftp.sra.ebi.ac.uk/vol1/fastq/SRR212/007/SRR2123947/SRR2123947_1.fastq.gz	ftp://ftp.sra.ebi.ac.uk/vol1/fastq/SRR212/007/SRR2123947/SRR2123947_2.fastq.gz	source_name: uterine endometrium || infection status: UNINF || tissue: uterine endometrium	uterine endometrium	unknown	unknown	unknown
292	SRS1009046	Sus scrofa	PRJNA290579	SRR2123946	SRX1115524	RNA-Seq	cDNA	TRANSCRIPTOMIC	PAIRED	21.71	200	ILLUMINA	Illumina HiSeq 2000	https://sra-download.ncbi.nlm.nih.gov/traces/sra32/SRR/002074/SRR2123946	ftp://ftp.sra.ebi.ac.uk/vol1/fastq/SRR212/006/SRR2123946/SRR2123946_1.fastq.gz	ftp://ftp.sra.ebi.ac.uk/vol1/fastq/SRR212/006/SRR2123946/SRR2123946_2.fastq.gz	source_name: uterine endometrium || infection status: UNINF || tissue: uterine endometrium	uterine endometrium	unknown	unknown	unknown
293	SRS1009047	Sus scrofa	PRJNA290579	SRR2123945	SRX1115523	RNA-Seq	cDNA	TRANSCRIPTOMIC	PAIRED	29.08	200	ILLUMINA	Illumina HiSeq 2000	https://sra-download.ncbi.nlm.nih.gov/traces/sra32/SRR/002074/SRR2123945	ftp://ftp.sra.ebi.ac.uk/vol1/fastq/SRR212/005/SRR2123945/SRR2123945_1.fastq.gz	ftp://ftp.sra.ebi.ac.uk/vol1/fastq/SRR212/005/SRR2123945/SRR2123945_2.fastq.gz	source_name: uterine endometrium || infection status: UNINF || tissue: uterine endometrium	uterine endometrium	unknown	unknown	unknown
294	SRS1009048	Sus scrofa	PRJNA290579	SRR2123943	SRX1115521	RNA-Seq	cDNA	TRANSCRIPTOMIC	PAIRED	22.37	200	ILLUMINA	Illumina HiSeq 2000	https://sra-download.ncbi.nlm.nih.gov/traces/sra32/SRR/002074/SRR2123943	ftp://ftp.sra.ebi.ac.uk/vol1/fastq/SRR212/003/SRR2123943/SRR2123943_1.fastq.gz	ftp://ftp.sra.ebi.ac.uk/vol1/fastq/SRR212/003/SRR2123943/SRR2123943_2.fastq.gz	source_name: uterine endometrium || infection status: CON || tissue: uterine endometrium	uterine endometrium	unknown	unknown	unknown
295	SRS1009049	Sus scrofa	PRJNA290579	SRR2123944	SRX1115522	RNA-Seq	cDNA	TRANSCRIPTOMIC	PAIRED	27.71	200	ILLUMINA	Illumina HiSeq 2000	https://sra-download.ncbi.nlm.nih.gov/traces/sra32/SRR/002074/SRR2123944	ftp://ftp.sra.ebi.ac.uk/vol1/fastq/SRR212/004/SRR2123944/SRR2123944_1.fastq.gz	ftp://ftp.sra.ebi.ac.uk/vol1/fastq/SRR212/004/SRR2123944/SRR2123944_2.fastq.gz	source_name: uterine endometrium || infection status: CON || tissue: uterine endometrium	uterine endometrium	unknown	unknown	unknown
296	SRS1009050	Sus scrofa	PRJNA290579	SRR2123942	SRX1115520	RNA-Seq	cDNA	TRANSCRIPTOMIC	PAIRED	34.39	200	ILLUMINA	Illumina HiSeq 2000	https://sra-download.ncbi.nlm.nih.gov/traces/sra32/SRR/002074/SRR2123942	ftp://ftp.sra.ebi.ac.uk/vol1/fastq/SRR212/002/SRR2123942/SRR2123942_1.fastq.gz	ftp://ftp.sra.ebi.ac.uk/vol1/fastq/SRR212/002/SRR2123942/SRR2123942_2.fastq.gz	source_name: uterine endometrium || infection status: CON || tissue: uterine endometrium	uterine endometrium	unknown	unknown	unknown
297	SRS1009051	Sus scrofa	PRJNA290579	SRR2123941	SRX1115519	RNA-Seq	cDNA	TRANSCRIPTOMIC	PAIRED	20.45	200	ILLUMINA	Illumina HiSeq 2000	https://sra-download.ncbi.nlm.nih.gov/traces/sra32/SRR/002074/SRR2123941	ftp://ftp.sra.ebi.ac.uk/vol1/fastq/SRR212/001/SRR2123941/SRR2123941_1.fastq.gz	ftp://ftp.sra.ebi.ac.uk/vol1/fastq/SRR212/001/SRR2123941/SRR2123941_2.fastq.gz	source_name: uterine endometrium || infection status: CON || tissue: uterine endometrium	uterine endometrium	unknown	unknown	unknown
298	SRS1009052	Sus scrofa	PRJNA290579	SRR2123938	SRX1115516	RNA-Seq	cDNA	TRANSCRIPTOMIC	PAIRED	26.94	200	ILLUMINA	Illumina HiSeq 2000	https://sra-download.ncbi.nlm.nih.gov/traces/sra32/SRR/002074/SRR2123938	ftp://ftp.sra.ebi.ac.uk/vol1/fastq/SRR212/008/SRR2123938/SRR2123938_1.fastq.gz	ftp://ftp.sra.ebi.ac.uk/vol1/fastq/SRR212/008/SRR2123938/SRR2123938_2.fastq.gz	source_name: uterine endometrium || infection status: CON || tissue: uterine endometrium	uterine endometrium	unknown	unknown	unknown
299	SRS1009053	Sus scrofa	PRJNA290579	SRR2123939	SRX1115517	RNA-Seq	cDNA	TRANSCRIPTOMIC	PAIRED	26	200	ILLUMINA	Illumina HiSeq 2000	https://sra-download.ncbi.nlm.nih.gov/traces/sra32/SRR/002074/SRR2123939	ftp://ftp.sra.ebi.ac.uk/vol1/fastq/SRR212/009/SRR2123939/SRR2123939_1.fastq.gz	ftp://ftp.sra.ebi.ac.uk/vol1/fastq/SRR212/009/SRR2123939/SRR2123939_2.fastq.gz	source_name: uterine endometrium || infection status: CON || tissue: uterine endometrium	uterine endometrium	unknown	unknown	unknown
300	SRS1009054	Sus scrofa	PRJNA290579	SRR2123940	SRX1115518	RNA-Seq	cDNA	TRANSCRIPTOMIC	PAIRED	31.28	200	ILLUMINA	Illumina HiSeq 2000	https://sra-download.ncbi.nlm.nih.gov/traces/sra32/SRR/002074/SRR2123940	ftp://ftp.sra.ebi.ac.uk/vol1/fastq/SRR212/000/SRR2123940/SRR2123940_1.fastq.gz	ftp://ftp.sra.ebi.ac.uk/vol1/fastq/SRR212/000/SRR2123940/SRR2123940_2.fastq.gz	source_name: uterine endometrium || infection status: CON || tissue: uterine endometrium	uterine endometrium	unknown	unknown	unknown
301	SRS1009055	Sus scrofa	PRJNA290579	SRR2123937	SRX1115515	RNA-Seq	cDNA	TRANSCRIPTOMIC	PAIRED	40.27	200	ILLUMINA	Illumina HiSeq 2000	https://sra-download.ncbi.nlm.nih.gov/traces/sra32/SRR/002074/SRR2123937	ftp://ftp.sra.ebi.ac.uk/vol1/fastq/SRR212/007/SRR2123937/SRR2123937_1.fastq.gz	ftp://ftp.sra.ebi.ac.uk/vol1/fastq/SRR212/007/SRR2123937/SRR2123937_2.fastq.gz	source_name: uterine endometrium || infection status: CON || tissue: uterine endometrium	uterine endometrium	unknown	unknown	unknown
302	SRS1009056	Sus scrofa	PRJNA290579	SRR2123936	SRX1115514	RNA-Seq	cDNA	TRANSCRIPTOMIC	PAIRED	30.63	200	ILLUMINA	Illumina HiSeq 2000	https://sra-download.ncbi.nlm.nih.gov/traces/sra32/SRR/002074/SRR2123936	ftp://ftp.sra.ebi.ac.uk/vol1/fastq/SRR212/006/SRR2123936/SRR2123936_1.fastq.gz	ftp://ftp.sra.ebi.ac.uk/vol1/fastq/SRR212/006/SRR2123936/SRR2123936_2.fastq.gz	source_name: uterine endometrium || infection status: CON || tissue: uterine endometrium	uterine endometrium	unknown	unknown	unknown
303	SRS1009057	Sus scrofa	PRJNA290579	SRR2123934	SRX1115512	RNA-Seq	cDNA	TRANSCRIPTOMIC	PAIRED	33	200	ILLUMINA	Illumina HiSeq 2000	https://sra-download.ncbi.nlm.nih.gov/traces/sra32/SRR/002074/SRR2123934	ftp://ftp.sra.ebi.ac.uk/vol1/fastq/SRR212/004/SRR2123934/SRR2123934_1.fastq.gz	ftp://ftp.sra.ebi.ac.uk/vol1/fastq/SRR212/004/SRR2123934/SRR2123934_2.fastq.gz	source_name: uterine endometrium || infection status: CON || tissue: uterine endometrium	uterine endometrium	unknown	unknown	unknown
304	SRS1009058	Sus scrofa	PRJNA290579	SRR2123935	SRX1115513	RNA-Seq	cDNA	TRANSCRIPTOMIC	PAIRED	22.21	200	ILLUMINA	Illumina HiSeq 2000	https://sra-download.ncbi.nlm.nih.gov/traces/sra32/SRR/002074/SRR2123935	ftp://ftp.sra.ebi.ac.uk/vol1/fastq/SRR212/005/SRR2123935/SRR2123935_1.fastq.gz	ftp://ftp.sra.ebi.ac.uk/vol1/fastq/SRR212/005/SRR2123935/SRR2123935_2.fastq.gz	source_name: uterine endometrium || infection status: CON || tissue: uterine endometrium	uterine endometrium	unknown	unknown	unknown
305	SRS1009059	Sus scrofa	PRJNA290579	SRR2123932	SRX1115510	RNA-Seq	cDNA	TRANSCRIPTOMIC	PAIRED	32.15	200	ILLUMINA	Illumina HiSeq 2000	https://sra-download.ncbi.nlm.nih.gov/traces/sra32/SRR/002074/SRR2123932	ftp://ftp.sra.ebi.ac.uk/vol1/fastq/SRR212/002/SRR2123932/SRR2123932_1.fastq.gz	ftp://ftp.sra.ebi.ac.uk/vol1/fastq/SRR212/002/SRR2123932/SRR2123932_2.fastq.gz	source_name: fetal thymus || infection status: MEC || tissue: fetal thymus	fetal thymus	unknown	unknown	unknown
306	SRS1009060	Sus scrofa	PRJNA290579	SRR2123933	SRX1115511	RNA-Seq	cDNA	TRANSCRIPTOMIC	PAIRED	27.71	200	ILLUMINA	Illumina HiSeq 2000	https://sra-download.ncbi.nlm.nih.gov/traces/sra32/SRR/002074/SRR2123933	ftp://ftp.sra.ebi.ac.uk/vol1/fastq/SRR212/003/SRR2123933/SRR2123933_1.fastq.gz	ftp://ftp.sra.ebi.ac.uk/vol1/fastq/SRR212/003/SRR2123933/SRR2123933_2.fastq.gz	source_name: uterine endometrium || infection status: CON || tissue: uterine endometrium	uterine endometrium	unknown	unknown	unknown
307	SRS1009061	Sus scrofa	PRJNA290579	SRR2123931	SRX1115509	RNA-Seq	cDNA	TRANSCRIPTOMIC	PAIRED	33.15	200	ILLUMINA	Illumina HiSeq 2000	https://sra-download.ncbi.nlm.nih.gov/traces/sra32/SRR/002074/SRR2123931	ftp://ftp.sra.ebi.ac.uk/vol1/fastq/SRR212/001/SRR2123931/SRR2123931_1.fastq.gz	ftp://ftp.sra.ebi.ac.uk/vol1/fastq/SRR212/001/SRR2123931/SRR2123931_2.fastq.gz	source_name: fetal thymus || infection status: MEC || tissue: fetal thymus	fetal thymus	unknown	unknown	unknown
308	SRS1009062	Sus scrofa	PRJNA290579	SRR2123930	SRX1115508	RNA-Seq	cDNA	TRANSCRIPTOMIC	PAIRED	32.02	200	ILLUMINA	Illumina HiSeq 2000	https://sra-download.ncbi.nlm.nih.gov/traces/sra32/SRR/002074/SRR2123930	ftp://ftp.sra.ebi.ac.uk/vol1/fastq/SRR212/000/SRR2123930/SRR2123930_1.fastq.gz	ftp://ftp.sra.ebi.ac.uk/vol1/fastq/SRR212/000/SRR2123930/SRR2123930_2.fastq.gz	source_name: fetal thymus || infection status: MEC || tissue: fetal thymus	fetal thymus	unknown	unknown	unknown
309	SRS1009063	Sus scrofa	PRJNA290579	SRR2123928	SRX1115506	RNA-Seq	cDNA	TRANSCRIPTOMIC	PAIRED	33.41	200	ILLUMINA	Illumina HiSeq 2000	https://sra-download.ncbi.nlm.nih.gov/traces/sra32/SRR/002074/SRR2123928	ftp://ftp.sra.ebi.ac.uk/vol1/fastq/SRR212/008/SRR2123928/SRR2123928_1.fastq.gz	ftp://ftp.sra.ebi.ac.uk/vol1/fastq/SRR212/008/SRR2123928/SRR2123928_2.fastq.gz	source_name: fetal thymus || infection status: MEC || tissue: fetal thymus	fetal thymus	unknown	unknown	unknown
310	SRS1009064	Sus scrofa	PRJNA290579	SRR2123929	SRX1115507	RNA-Seq	cDNA	TRANSCRIPTOMIC	PAIRED	30.6	200	ILLUMINA	Illumina HiSeq 2000	https://sra-download.ncbi.nlm.nih.gov/traces/sra32/SRR/002074/SRR2123929	ftp://ftp.sra.ebi.ac.uk/vol1/fastq/SRR212/009/SRR2123929/SRR2123929_1.fastq.gz	ftp://ftp.sra.ebi.ac.uk/vol1/fastq/SRR212/009/SRR2123929/SRR2123929_2.fastq.gz	source_name: fetal thymus || infection status: MEC || tissue: fetal thymus	fetal thymus	unknown	unknown	unknown
311	SRS1009065	Sus scrofa	PRJNA290579	SRR2123927	SRX1115505	RNA-Seq	cDNA	TRANSCRIPTOMIC	PAIRED	29.88	200	ILLUMINA	Illumina HiSeq 2000	https://sra-download.ncbi.nlm.nih.gov/traces/sra32/SRR/002074/SRR2123927	ftp://ftp.sra.ebi.ac.uk/vol1/fastq/SRR212/007/SRR2123927/SRR2123927_1.fastq.gz	ftp://ftp.sra.ebi.ac.uk/vol1/fastq/SRR212/007/SRR2123927/SRR2123927_2.fastq.gz	source_name: fetal thymus || infection status: MEC || tissue: fetal thymus	fetal thymus	unknown	unknown	unknown
312	SRS1009066	Sus scrofa	PRJNA290579	SRR2123926	SRX1115504	RNA-Seq	cDNA	TRANSCRIPTOMIC	PAIRED	25.28	200	ILLUMINA	Illumina HiSeq 2000	https://sra-download.ncbi.nlm.nih.gov/traces/sra32/SRR/002074/SRR2123926	ftp://ftp.sra.ebi.ac.uk/vol1/fastq/SRR212/006/SRR2123926/SRR2123926_1.fastq.gz	ftp://ftp.sra.ebi.ac.uk/vol1/fastq/SRR212/006/SRR2123926/SRR2123926_2.fastq.gz	source_name: fetal thymus || infection status: MEC || tissue: fetal thymus	fetal thymus	unknown	unknown	unknown
313	SRS1009067	Sus scrofa	PRJNA290579	SRR2123924	SRX1115502	RNA-Seq	cDNA	TRANSCRIPTOMIC	PAIRED	20.91	200	ILLUMINA	Illumina HiSeq 2000	https://sra-download.ncbi.nlm.nih.gov/traces/sra32/SRR/002074/SRR2123924	ftp://ftp.sra.ebi.ac.uk/vol1/fastq/SRR212/004/SRR2123924/SRR2123924_1.fastq.gz	ftp://ftp.sra.ebi.ac.uk/vol1/fastq/SRR212/004/SRR2123924/SRR2123924_2.fastq.gz	source_name: fetal thymus || infection status: MEC || tissue: fetal thymus	fetal thymus	unknown	unknown	unknown
314	SRS1009068	Sus scrofa	PRJNA290579	SRR2123925	SRX1115503	RNA-Seq	cDNA	TRANSCRIPTOMIC	PAIRED	26.49	200	ILLUMINA	Illumina HiSeq 2000	https://sra-download.ncbi.nlm.nih.gov/traces/sra32/SRR/002074/SRR2123925	ftp://ftp.sra.ebi.ac.uk/vol1/fastq/SRR212/005/SRR2123925/SRR2123925_1.fastq.gz	ftp://ftp.sra.ebi.ac.uk/vol1/fastq/SRR212/005/SRR2123925/SRR2123925_2.fastq.gz	source_name: fetal thymus || infection status: MEC || tissue: fetal thymus	fetal thymus	unknown	unknown	unknown
315	SRS1009069	Sus scrofa	PRJNA290579	SRR2123923	SRX1115501	RNA-Seq	cDNA	TRANSCRIPTOMIC	PAIRED	23.81	200	ILLUMINA	Illumina HiSeq 2000	https://sra-download.ncbi.nlm.nih.gov/traces/sra32/SRR/002074/SRR2123923	ftp://ftp.sra.ebi.ac.uk/vol1/fastq/SRR212/003/SRR2123923/SRR2123923_1.fastq.gz	ftp://ftp.sra.ebi.ac.uk/vol1/fastq/SRR212/003/SRR2123923/SRR2123923_2.fastq.gz	source_name: fetal thymus || infection status: MEC || tissue: fetal thymus	fetal thymus	unknown	unknown	unknown
316	SRS1009070	Sus scrofa	PRJNA290579	SRR2123921	SRX1115499	RNA-Seq	cDNA	TRANSCRIPTOMIC	PAIRED	34.75	200	ILLUMINA	Illumina HiSeq 2000	https://sra-download.ncbi.nlm.nih.gov/traces/sra32/SRR/002074/SRR2123921	ftp://ftp.sra.ebi.ac.uk/vol1/fastq/SRR212/001/SRR2123921/SRR2123921_1.fastq.gz	ftp://ftp.sra.ebi.ac.uk/vol1/fastq/SRR212/001/SRR2123921/SRR2123921_2.fastq.gz	source_name: fetal thymus || infection status: MEC || tissue: fetal thymus	fetal thymus	unknown	unknown	unknown
317	SRS1009071	Sus scrofa	PRJNA290579	SRR2123922	SRX1115500	RNA-Seq	cDNA	TRANSCRIPTOMIC	PAIRED	17.01	200	ILLUMINA	Illumina HiSeq 2000	https://sra-download.ncbi.nlm.nih.gov/traces/sra32/SRR/002074/SRR2123922	ftp://ftp.sra.ebi.ac.uk/vol1/fastq/SRR212/002/SRR2123922/SRR2123922_1.fastq.gz	ftp://ftp.sra.ebi.ac.uk/vol1/fastq/SRR212/002/SRR2123922/SRR2123922_2.fastq.gz	source_name: fetal thymus || infection status: MEC || tissue: fetal thymus	fetal thymus	unknown	unknown	unknown
318	SRS1009072	Sus scrofa	PRJNA290579	SRR2123919	SRX1115497	RNA-Seq	cDNA	TRANSCRIPTOMIC	PAIRED	34.55	200	ILLUMINA	Illumina HiSeq 2000	https://sra-download.ncbi.nlm.nih.gov/traces/sra32/SRR/002074/SRR2123919	ftp://ftp.sra.ebi.ac.uk/vol1/fastq/SRR212/009/SRR2123919/SRR2123919_1.fastq.gz	ftp://ftp.sra.ebi.ac.uk/vol1/fastq/SRR212/009/SRR2123919/SRR2123919_2.fastq.gz	source_name: fetal thymus || infection status: INF || tissue: fetal thymus	fetal thymus	unknown	unknown	unknown
319	SRS1009073	Sus scrofa	PRJNA290579	SRR2123920	SRX1115498	RNA-Seq	cDNA	TRANSCRIPTOMIC	PAIRED	23.02	200	ILLUMINA	Illumina HiSeq 2000	https://sra-download.ncbi.nlm.nih.gov/traces/sra32/SRR/002074/SRR2123920	ftp://ftp.sra.ebi.ac.uk/vol1/fastq/SRR212/000/SRR2123920/SRR2123920_1.fastq.gz	ftp://ftp.sra.ebi.ac.uk/vol1/fastq/SRR212/000/SRR2123920/SRR2123920_2.fastq.gz	source_name: fetal thymus || infection status: INF || tissue: fetal thymus	fetal thymus	unknown	unknown	unknown
320	SRS1009074	Sus scrofa	PRJNA290579	SRR2123918	SRX1115496	RNA-Seq	cDNA	TRANSCRIPTOMIC	PAIRED	28.45	200	ILLUMINA	Illumina HiSeq 2000	https://sra-download.ncbi.nlm.nih.gov/traces/sra32/SRR/002074/SRR2123918	ftp://ftp.sra.ebi.ac.uk/vol1/fastq/SRR212/008/SRR2123918/SRR2123918_1.fastq.gz	ftp://ftp.sra.ebi.ac.uk/vol1/fastq/SRR212/008/SRR2123918/SRR2123918_2.fastq.gz	source_name: fetal thymus || infection status: INF || tissue: fetal thymus	fetal thymus	unknown	unknown	unknown
321	SRS1009075	Sus scrofa	PRJNA290579	SRR2123917	SRX1115495	RNA-Seq	cDNA	TRANSCRIPTOMIC	PAIRED	37.3	200	ILLUMINA	Illumina HiSeq 2000	https://sra-download.ncbi.nlm.nih.gov/traces/sra32/SRR/002074/SRR2123917	ftp://ftp.sra.ebi.ac.uk/vol1/fastq/SRR212/007/SRR2123917/SRR2123917_1.fastq.gz	ftp://ftp.sra.ebi.ac.uk/vol1/fastq/SRR212/007/SRR2123917/SRR2123917_2.fastq.gz	source_name: fetal thymus || infection status: INF || tissue: fetal thymus	fetal thymus	unknown	unknown	unknown
322	SRS1009076	Sus scrofa	PRJNA290579	SRR2123916	SRX1115494	RNA-Seq	cDNA	TRANSCRIPTOMIC	PAIRED	36.81	200	ILLUMINA	Illumina HiSeq 2000	https://sra-download.ncbi.nlm.nih.gov/traces/sra32/SRR/002074/SRR2123916	ftp://ftp.sra.ebi.ac.uk/vol1/fastq/SRR212/006/SRR2123916/SRR2123916_1.fastq.gz	ftp://ftp.sra.ebi.ac.uk/vol1/fastq/SRR212/006/SRR2123916/SRR2123916_2.fastq.gz	source_name: fetal thymus || infection status: INF || tissue: fetal thymus	fetal thymus	unknown	unknown	unknown
323	SRS1009077	Sus scrofa	PRJNA290579	SRR2123915	SRX1115493	RNA-Seq	cDNA	TRANSCRIPTOMIC	PAIRED	28.07	200	ILLUMINA	Illumina HiSeq 2000	https://sra-download.ncbi.nlm.nih.gov/traces/sra32/SRR/002074/SRR2123915	ftp://ftp.sra.ebi.ac.uk/vol1/fastq/SRR212/005/SRR2123915/SRR2123915_1.fastq.gz	ftp://ftp.sra.ebi.ac.uk/vol1/fastq/SRR212/005/SRR2123915/SRR2123915_2.fastq.gz	source_name: fetal thymus || infection status: INF || tissue: fetal thymus	fetal thymus	unknown	unknown	unknown
324	SRS1009078	Sus scrofa	PRJNA290579	SRR2123914	SRX1115492	RNA-Seq	cDNA	TRANSCRIPTOMIC	PAIRED	23.93	200	ILLUMINA	Illumina HiSeq 2000	https://sra-download.ncbi.nlm.nih.gov/traces/sra32/SRR/002074/SRR2123914	ftp://ftp.sra.ebi.ac.uk/vol1/fastq/SRR212/004/SRR2123914/SRR2123914_1.fastq.gz	ftp://ftp.sra.ebi.ac.uk/vol1/fastq/SRR212/004/SRR2123914/SRR2123914_2.fastq.gz	source_name: fetal thymus || infection status: INF || tissue: fetal thymus	fetal thymus	unknown	unknown	unknown
325	SRS1009079	Sus scrofa	PRJNA290579	SRR2123913	SRX1115491	RNA-Seq	cDNA	TRANSCRIPTOMIC	PAIRED	20.41	200	ILLUMINA	Illumina HiSeq 2000	https://sra-download.ncbi.nlm.nih.gov/traces/sra32/SRR/002074/SRR2123913	ftp://ftp.sra.ebi.ac.uk/vol1/fastq/SRR212/003/SRR2123913/SRR2123913_1.fastq.gz	ftp://ftp.sra.ebi.ac.uk/vol1/fastq/SRR212/003/SRR2123913/SRR2123913_2.fastq.gz	source_name: fetal thymus || infection status: INF || tissue: fetal thymus	fetal thymus	unknown	unknown	unknown
326	SRS1009080	Sus scrofa	PRJNA290579	SRR2123912	SRX1115490	RNA-Seq	cDNA	TRANSCRIPTOMIC	PAIRED	23.21	200	ILLUMINA	Illumina HiSeq 2000	https://sra-download.ncbi.nlm.nih.gov/traces/sra32/SRR/002074/SRR2123912	ftp://ftp.sra.ebi.ac.uk/vol1/fastq/SRR212/002/SRR2123912/SRR2123912_1.fastq.gz	ftp://ftp.sra.ebi.ac.uk/vol1/fastq/SRR212/002/SRR2123912/SRR2123912_2.fastq.gz	source_name: fetal thymus || infection status: INF || tissue: fetal thymus	fetal thymus	unknown	unknown	unknown
327	SRS1009081	Sus scrofa	PRJNA290579	SRR2123911	SRX1115489	RNA-Seq	cDNA	TRANSCRIPTOMIC	PAIRED	29.43	200	ILLUMINA	Illumina HiSeq 2000	https://sra-download.ncbi.nlm.nih.gov/traces/sra32/SRR/002074/SRR2123911	ftp://ftp.sra.ebi.ac.uk/vol1/fastq/SRR212/001/SRR2123911/SRR2123911_1.fastq.gz	ftp://ftp.sra.ebi.ac.uk/vol1/fastq/SRR212/001/SRR2123911/SRR2123911_2.fastq.gz	source_name: fetal thymus || infection status: INF || tissue: fetal thymus	fetal thymus	unknown	unknown	unknown
328	SRS1009082	Sus scrofa	PRJNA290579	SRR2123909	SRX1115487	RNA-Seq	cDNA	TRANSCRIPTOMIC	PAIRED	26.82	200	ILLUMINA	Illumina HiSeq 2000	https://sra-download.ncbi.nlm.nih.gov/traces/sra32/SRR/002074/SRR2123909	ftp://ftp.sra.ebi.ac.uk/vol1/fastq/SRR212/009/SRR2123909/SRR2123909_1.fastq.gz	ftp://ftp.sra.ebi.ac.uk/vol1/fastq/SRR212/009/SRR2123909/SRR2123909_2.fastq.gz	source_name: fetal thymus || infection status: INF || tissue: fetal thymus	fetal thymus	unknown	unknown	unknown
329	SRS1009083	Sus scrofa	PRJNA290579	SRR2123910	SRX1115488	RNA-Seq	cDNA	TRANSCRIPTOMIC	PAIRED	36.04	200	ILLUMINA	Illumina HiSeq 2000	https://sra-download.ncbi.nlm.nih.gov/traces/sra32/SRR/002074/SRR2123910	ftp://ftp.sra.ebi.ac.uk/vol1/fastq/SRR212/000/SRR2123910/SRR2123910_1.fastq.gz	ftp://ftp.sra.ebi.ac.uk/vol1/fastq/SRR212/000/SRR2123910/SRR2123910_2.fastq.gz	source_name: fetal thymus || infection status: INF || tissue: fetal thymus	fetal thymus	unknown	unknown	unknown
330	SRS1009084	Sus scrofa	PRJNA290579	SRR2123908	SRX1115486	RNA-Seq	cDNA	TRANSCRIPTOMIC	PAIRED	30.49	200	ILLUMINA	Illumina HiSeq 2000	https://sra-download.ncbi.nlm.nih.gov/traces/sra32/SRR/002074/SRR2123908	ftp://ftp.sra.ebi.ac.uk/vol1/fastq/SRR212/008/SRR2123908/SRR2123908_1.fastq.gz	ftp://ftp.sra.ebi.ac.uk/vol1/fastq/SRR212/008/SRR2123908/SRR2123908_2.fastq.gz	source_name: fetal thymus || infection status: UNINF || tissue: fetal thymus	fetal thymus	unknown	unknown	unknown
331	SRS1009085	Sus scrofa	PRJNA290579	SRR2123907	SRX1115485	RNA-Seq	cDNA	TRANSCRIPTOMIC	PAIRED	23.98	200	ILLUMINA	Illumina HiSeq 2000	https://sra-download.ncbi.nlm.nih.gov/traces/sra32/SRR/002074/SRR2123907	ftp://ftp.sra.ebi.ac.uk/vol1/fastq/SRR212/007/SRR2123907/SRR2123907_1.fastq.gz	ftp://ftp.sra.ebi.ac.uk/vol1/fastq/SRR212/007/SRR2123907/SRR2123907_2.fastq.gz	source_name: fetal thymus || infection status: UNINF || tissue: fetal thymus	fetal thymus	unknown	unknown	unknown
332	SRS1009086	Sus scrofa	PRJNA290579	SRR2123906	SRX1115484	RNA-Seq	cDNA	TRANSCRIPTOMIC	PAIRED	35.81	200	ILLUMINA	Illumina HiSeq 2000	https://sra-download.ncbi.nlm.nih.gov/traces/sra32/SRR/002074/SRR2123906	ftp://ftp.sra.ebi.ac.uk/vol1/fastq/SRR212/006/SRR2123906/SRR2123906_1.fastq.gz	ftp://ftp.sra.ebi.ac.uk/vol1/fastq/SRR212/006/SRR2123906/SRR2123906_2.fastq.gz	source_name: fetal thymus || infection status: UNINF || tissue: fetal thymus	fetal thymus	unknown	unknown	unknown
333	SRS1009087	Sus scrofa	PRJNA290579	SRR2123905	SRX1115483	RNA-Seq	cDNA	TRANSCRIPTOMIC	PAIRED	21.85	200	ILLUMINA	Illumina HiSeq 2000	https://sra-download.ncbi.nlm.nih.gov/traces/sra32/SRR/002074/SRR2123905	ftp://ftp.sra.ebi.ac.uk/vol1/fastq/SRR212/005/SRR2123905/SRR2123905_1.fastq.gz	ftp://ftp.sra.ebi.ac.uk/vol1/fastq/SRR212/005/SRR2123905/SRR2123905_2.fastq.gz	source_name: fetal thymus || infection status: UNINF || tissue: fetal thymus	fetal thymus	unknown	unknown	unknown
334	SRS1009088	Sus scrofa	PRJNA290579	SRR2123903	SRX1115481	RNA-Seq	cDNA	TRANSCRIPTOMIC	PAIRED	37.63	200	ILLUMINA	Illumina HiSeq 2000	https://sra-download.ncbi.nlm.nih.gov/traces/sra32/SRR/002074/SRR2123903	ftp://ftp.sra.ebi.ac.uk/vol1/fastq/SRR212/003/SRR2123903/SRR2123903_1.fastq.gz	ftp://ftp.sra.ebi.ac.uk/vol1/fastq/SRR212/003/SRR2123903/SRR2123903_2.fastq.gz	source_name: fetal thymus || infection status: UNINF || tissue: fetal thymus	fetal thymus	unknown	unknown	unknown
335	SRS1009089	Sus scrofa	PRJNA290579	SRR2123904	SRX1115482	RNA-Seq	cDNA	TRANSCRIPTOMIC	PAIRED	34.18	200	ILLUMINA	Illumina HiSeq 2000	https://sra-download.ncbi.nlm.nih.gov/traces/sra32/SRR/002074/SRR2123904	ftp://ftp.sra.ebi.ac.uk/vol1/fastq/SRR212/004/SRR2123904/SRR2123904_1.fastq.gz	ftp://ftp.sra.ebi.ac.uk/vol1/fastq/SRR212/004/SRR2123904/SRR2123904_2.fastq.gz	source_name: fetal thymus || infection status: UNINF || tissue: fetal thymus	fetal thymus	unknown	unknown	unknown
336	SRS1009090	Sus scrofa	PRJNA290579	SRR2123902	SRX1115480	RNA-Seq	cDNA	TRANSCRIPTOMIC	PAIRED	27.98	200	ILLUMINA	Illumina HiSeq 2000	https://sra-download.ncbi.nlm.nih.gov/traces/sra32/SRR/002074/SRR2123902	ftp://ftp.sra.ebi.ac.uk/vol1/fastq/SRR212/002/SRR2123902/SRR2123902_1.fastq.gz	ftp://ftp.sra.ebi.ac.uk/vol1/fastq/SRR212/002/SRR2123902/SRR2123902_2.fastq.gz	source_name: fetal thymus || infection status: UNINF || tissue: fetal thymus	fetal thymus	unknown	unknown	unknown
337	SRS1009091	Sus scrofa	PRJNA290579	SRR2123901	SRX1115479	RNA-Seq	cDNA	TRANSCRIPTOMIC	PAIRED	28.81	200	ILLUMINA	Illumina HiSeq 2000	https://sra-download.ncbi.nlm.nih.gov/traces/sra32/SRR/002074/SRR2123901	ftp://ftp.sra.ebi.ac.uk/vol1/fastq/SRR212/001/SRR2123901/SRR2123901_1.fastq.gz	ftp://ftp.sra.ebi.ac.uk/vol1/fastq/SRR212/001/SRR2123901/SRR2123901_2.fastq.gz	source_name: fetal thymus || infection status: UNINF || tissue: fetal thymus	fetal thymus	unknown	unknown	unknown
338	SRS1009092	Sus scrofa	PRJNA290579	SRR2123900	SRX1115478	RNA-Seq	cDNA	TRANSCRIPTOMIC	PAIRED	30.93	200	ILLUMINA	Illumina HiSeq 2000	https://sra-download.ncbi.nlm.nih.gov/traces/sra32/SRR/002074/SRR2123900	ftp://ftp.sra.ebi.ac.uk/vol1/fastq/SRR212/000/SRR2123900/SRR2123900_1.fastq.gz	ftp://ftp.sra.ebi.ac.uk/vol1/fastq/SRR212/000/SRR2123900/SRR2123900_2.fastq.gz	source_name: fetal thymus || infection status: UNINF || tissue: fetal thymus	fetal thymus	unknown	unknown	unknown
339	SRS1009093	Sus scrofa	PRJNA290579	SRR2123899	SRX1115477	RNA-Seq	cDNA	TRANSCRIPTOMIC	PAIRED	31.49	200	ILLUMINA	Illumina HiSeq 2000	https://sra-download.ncbi.nlm.nih.gov/traces/sra32/SRR/002074/SRR2123899	ftp://ftp.sra.ebi.ac.uk/vol1/fastq/SRR212/009/SRR2123899/SRR2123899_1.fastq.gz	ftp://ftp.sra.ebi.ac.uk/vol1/fastq/SRR212/009/SRR2123899/SRR2123899_2.fastq.gz	source_name: fetal thymus || infection status: UNINF || tissue: fetal thymus	fetal thymus	unknown	unknown	unknown
340	SRS1009094	Sus scrofa	PRJNA290579	SRR2123898	SRX1115476	RNA-Seq	cDNA	TRANSCRIPTOMIC	PAIRED	27.31	200	ILLUMINA	Illumina HiSeq 2000	https://sra-download.ncbi.nlm.nih.gov/traces/sra32/SRR/002074/SRR2123898	ftp://ftp.sra.ebi.ac.uk/vol1/fastq/SRR212/008/SRR2123898/SRR2123898_1.fastq.gz	ftp://ftp.sra.ebi.ac.uk/vol1/fastq/SRR212/008/SRR2123898/SRR2123898_2.fastq.gz	source_name: fetal thymus || infection status: UNINF || tissue: fetal thymus	fetal thymus	unknown	unknown	unknown
341	SRS1009095	Sus scrofa	PRJNA290579	SRR2123897	SRX1115475	RNA-Seq	cDNA	TRANSCRIPTOMIC	PAIRED	22.32	200	ILLUMINA	Illumina HiSeq 2000	https://sra-download.ncbi.nlm.nih.gov/traces/sra32/SRR/002074/SRR2123897	ftp://ftp.sra.ebi.ac.uk/vol1/fastq/SRR212/007/SRR2123897/SRR2123897_1.fastq.gz	ftp://ftp.sra.ebi.ac.uk/vol1/fastq/SRR212/007/SRR2123897/SRR2123897_2.fastq.gz	source_name: fetal thymus || infection status: UNINF || tissue: fetal thymus	fetal thymus	unknown	unknown	unknown
342	SRS1009096	Sus scrofa	PRJNA290579	SRR2123896	SRX1115474	RNA-Seq	cDNA	TRANSCRIPTOMIC	PAIRED	31.34	200	ILLUMINA	Illumina HiSeq 2000	https://sra-download.ncbi.nlm.nih.gov/traces/sra32/SRR/002074/SRR2123896	ftp://ftp.sra.ebi.ac.uk/vol1/fastq/SRR212/006/SRR2123896/SRR2123896_1.fastq.gz	ftp://ftp.sra.ebi.ac.uk/vol1/fastq/SRR212/006/SRR2123896/SRR2123896_2.fastq.gz	source_name: fetal thymus || infection status: CON || tissue: fetal thymus	fetal thymus	unknown	unknown	unknown
343	SRS1009097	Sus scrofa	PRJNA290579	SRR2123894	SRX1115472	RNA-Seq	cDNA	TRANSCRIPTOMIC	PAIRED	37.68	200	ILLUMINA	Illumina HiSeq 2000	https://sra-download.ncbi.nlm.nih.gov/traces/sra32/SRR/002074/SRR2123894	ftp://ftp.sra.ebi.ac.uk/vol1/fastq/SRR212/004/SRR2123894/SRR2123894_1.fastq.gz	ftp://ftp.sra.ebi.ac.uk/vol1/fastq/SRR212/004/SRR2123894/SRR2123894_2.fastq.gz	source_name: fetal thymus || infection status: CON || tissue: fetal thymus	fetal thymus	unknown	unknown	unknown
344	SRS1009098	Sus scrofa	PRJNA290579	SRR2123895	SRX1115473	RNA-Seq	cDNA	TRANSCRIPTOMIC	PAIRED	18.15	200	ILLUMINA	Illumina HiSeq 2000	https://sra-download.ncbi.nlm.nih.gov/traces/sra32/SRR/002074/SRR2123895	ftp://ftp.sra.ebi.ac.uk/vol1/fastq/SRR212/005/SRR2123895/SRR2123895_1.fastq.gz	ftp://ftp.sra.ebi.ac.uk/vol1/fastq/SRR212/005/SRR2123895/SRR2123895_2.fastq.gz	source_name: fetal thymus || infection status: CON || tissue: fetal thymus	fetal thymus	unknown	unknown	unknown
345	SRS1009099	Sus scrofa	PRJNA290579	SRR2123893	SRX1115471	RNA-Seq	cDNA	TRANSCRIPTOMIC	PAIRED	24.15	200	ILLUMINA	Illumina HiSeq 2000	https://sra-download.ncbi.nlm.nih.gov/traces/sra32/SRR/002074/SRR2123893	ftp://ftp.sra.ebi.ac.uk/vol1/fastq/SRR212/003/SRR2123893/SRR2123893_1.fastq.gz	ftp://ftp.sra.ebi.ac.uk/vol1/fastq/SRR212/003/SRR2123893/SRR2123893_2.fastq.gz	source_name: fetal thymus || infection status: CON || tissue: fetal thymus	fetal thymus	unknown	unknown	unknown
346	SRS1009100	Sus scrofa	PRJNA290579	SRR2123892	SRX1115470	RNA-Seq	cDNA	TRANSCRIPTOMIC	PAIRED	36.44	200	ILLUMINA	Illumina HiSeq 2000	https://sra-download.ncbi.nlm.nih.gov/traces/sra32/SRR/002074/SRR2123892	ftp://ftp.sra.ebi.ac.uk/vol1/fastq/SRR212/002/SRR2123892/SRR2123892_1.fastq.gz	ftp://ftp.sra.ebi.ac.uk/vol1/fastq/SRR212/002/SRR2123892/SRR2123892_2.fastq.gz	source_name: fetal thymus || infection status: CON || tissue: fetal thymus	fetal thymus	unknown	unknown	unknown
347	SRS1009101	Sus scrofa	PRJNA290579	SRR2123891	SRX1115469	RNA-Seq	cDNA	TRANSCRIPTOMIC	PAIRED	22.19	200	ILLUMINA	Illumina HiSeq 2000	https://sra-download.ncbi.nlm.nih.gov/traces/sra32/SRR/002074/SRR2123891	ftp://ftp.sra.ebi.ac.uk/vol1/fastq/SRR212/001/SRR2123891/SRR2123891_1.fastq.gz	ftp://ftp.sra.ebi.ac.uk/vol1/fastq/SRR212/001/SRR2123891/SRR2123891_2.fastq.gz	source_name: fetal thymus || infection status: CON || tissue: fetal thymus	fetal thymus	unknown	unknown	unknown
348	SRS1009102	Sus scrofa	PRJNA290579	SRR2123890	SRX1115468	RNA-Seq	cDNA	TRANSCRIPTOMIC	PAIRED	26.68	200	ILLUMINA	Illumina HiSeq 2000	https://sra-download.ncbi.nlm.nih.gov/traces/sra32/SRR/002074/SRR2123890	ftp://ftp.sra.ebi.ac.uk/vol1/fastq/SRR212/000/SRR2123890/SRR2123890_1.fastq.gz	ftp://ftp.sra.ebi.ac.uk/vol1/fastq/SRR212/000/SRR2123890/SRR2123890_2.fastq.gz	source_name: fetal thymus || infection status: CON || tissue: fetal thymus	fetal thymus	unknown	unknown	unknown
349	SRS1009103	Sus scrofa	PRJNA290579	SRR2123889	SRX1115467	RNA-Seq	cDNA	TRANSCRIPTOMIC	PAIRED	21.77	200	ILLUMINA	Illumina HiSeq 2000	https://sra-download.ncbi.nlm.nih.gov/traces/sra32/SRR/002074/SRR2123889	ftp://ftp.sra.ebi.ac.uk/vol1/fastq/SRR212/009/SRR2123889/SRR2123889_1.fastq.gz	ftp://ftp.sra.ebi.ac.uk/vol1/fastq/SRR212/009/SRR2123889/SRR2123889_2.fastq.gz	source_name: fetal thymus || infection status: CON || tissue: fetal thymus	fetal thymus	unknown	unknown	unknown
350	SRS1009104	Sus scrofa	PRJNA290579	SRR2123888	SRX1115466	RNA-Seq	cDNA	TRANSCRIPTOMIC	PAIRED	33.3	200	ILLUMINA	Illumina HiSeq 2000	https://sra-download.ncbi.nlm.nih.gov/traces/sra32/SRR/002074/SRR2123888	ftp://ftp.sra.ebi.ac.uk/vol1/fastq/SRR212/008/SRR2123888/SRR2123888_1.fastq.gz	ftp://ftp.sra.ebi.ac.uk/vol1/fastq/SRR212/008/SRR2123888/SRR2123888_2.fastq.gz	source_name: fetal thymus || infection status: CON || tissue: fetal thymus	fetal thymus	unknown	unknown	unknown
351	SRS1009105	Sus scrofa	PRJNA290579	SRR2123887	SRX1115465	RNA-Seq	cDNA	TRANSCRIPTOMIC	PAIRED	22.14	200	ILLUMINA	Illumina HiSeq 2000	https://sra-download.ncbi.nlm.nih.gov/traces/sra32/SRR/002074/SRR2123887	ftp://ftp.sra.ebi.ac.uk/vol1/fastq/SRR212/007/SRR2123887/SRR2123887_1.fastq.gz	ftp://ftp.sra.ebi.ac.uk/vol1/fastq/SRR212/007/SRR2123887/SRR2123887_2.fastq.gz	source_name: fetal thymus || infection status: CON || tissue: fetal thymus	fetal thymus	unknown	unknown	unknown
352	SRS1009106	Sus scrofa	PRJNA290579	SRR2123886	SRX1115464	RNA-Seq	cDNA	TRANSCRIPTOMIC	PAIRED	34.76	200	ILLUMINA	Illumina HiSeq 2000	https://sra-download.ncbi.nlm.nih.gov/traces/sra32/SRR/002074/SRR2123886	ftp://ftp.sra.ebi.ac.uk/vol1/fastq/SRR212/006/SRR2123886/SRR2123886_1.fastq.gz	ftp://ftp.sra.ebi.ac.uk/vol1/fastq/SRR212/006/SRR2123886/SRR2123886_2.fastq.gz	source_name: fetal thymus || infection status: CON || tissue: fetal thymus	fetal thymus	unknown	unknown	unknown
353	SRS1009107	Sus scrofa	PRJNA290579	SRR2123885	SRX1115463	RNA-Seq	cDNA	TRANSCRIPTOMIC	PAIRED	25.55	200	ILLUMINA	Illumina HiSeq 2000	https://sra-download.ncbi.nlm.nih.gov/traces/sra32/SRR/002074/SRR2123885	ftp://ftp.sra.ebi.ac.uk/vol1/fastq/SRR212/005/SRR2123885/SRR2123885_1.fastq.gz	ftp://ftp.sra.ebi.ac.uk/vol1/fastq/SRR212/005/SRR2123885/SRR2123885_2.fastq.gz	source_name: fetal thymus || infection status: CON || tissue: fetal thymus	fetal thymus	unknown	unknown	unknown
354	SRS1027235	Sus scrofa	PRJNA292166	SRR2148925	SRX1136484	RNA-Seq	cDNA	TRANSCRIPTOMIC	PAIRED	13.89	200	ILLUMINA	Illumina HiSeq 2000	https://sra-download.ncbi.nlm.nih.gov/traces/sra33/SRR/002098/SRR2148925	ftp://ftp.sra.ebi.ac.uk/vol1/fastq/SRR214/005/SRR2148925/SRR2148925_1.fastq.gz	ftp://ftp.sra.ebi.ac.uk/vol1/fastq/SRR214/005/SRR2148925/SRR2148925_2.fastq.gz	source_name: Embryonic brain || brain region: Hippocampus || embryonic day: E60	hippocampus	unknown	60 day embryo	unknown
355	SRS1027238	Sus scrofa	PRJNA292166	SRR2148922	SRX1136481	RNA-Seq	cDNA	TRANSCRIPTOMIC	PAIRED	19.16	200	ILLUMINA	Illumina HiSeq 2000	https://sra-download.ncbi.nlm.nih.gov/traces/sra33/SRR/002098/SRR2148922	ftp://ftp.sra.ebi.ac.uk/vol1/fastq/SRR214/002/SRR2148922/SRR2148922_1.fastq.gz	ftp://ftp.sra.ebi.ac.uk/vol1/fastq/SRR214/002/SRR2148922/SRR2148922_2.fastq.gz	source_name: Embryonic brain || brain region: Brain stem || embryonic day: E115	brain stem	unknown	115 day embryo	unknown
356	SRS1027242	Sus scrofa	PRJNA292166	SRR2148918	SRX1136477	RNA-Seq	cDNA	TRANSCRIPTOMIC	PAIRED	26.99	200	ILLUMINA	Illumina HiSeq 2000	https://sra-download.ncbi.nlm.nih.gov/traces/sra33/SRR/002098/SRR2148918	ftp://ftp.sra.ebi.ac.uk/vol1/fastq/SRR214/008/SRR2148918/SRR2148918_1.fastq.gz	ftp://ftp.sra.ebi.ac.uk/vol1/fastq/SRR214/008/SRR2148918/SRR2148918_2.fastq.gz	source_name: Embryonic brain || brain region: Cortex || embryonic day: E115	cortex	unknown	115 day embryo	unknown
357	SRS1027243	Sus scrofa	PRJNA292166	SRR2148917	SRX1136476	RNA-Seq	cDNA	TRANSCRIPTOMIC	PAIRED	24.26	200	ILLUMINA	Illumina HiSeq 2000	https://sra-download.ncbi.nlm.nih.gov/traces/sra33/SRR/002098/SRR2148917	ftp://ftp.sra.ebi.ac.uk/vol1/fastq/SRR214/007/SRR2148917/SRR2148917_1.fastq.gz	ftp://ftp.sra.ebi.ac.uk/vol1/fastq/SRR214/007/SRR2148917/SRR2148917_2.fastq.gz	source_name: Embryonic brain || brain region: Cortex || embryonic day: E100	cortex	unknown	100 day embryo	unknown
358	SRS1027244	Sus scrofa	PRJNA292166	SRR2148916	SRX1136475	RNA-Seq	cDNA	TRANSCRIPTOMIC	PAIRED	13.32	200	ILLUMINA	Illumina HiSeq 2000	https://sra-download.ncbi.nlm.nih.gov/traces/sra33/SRR/002098/SRR2148916	ftp://ftp.sra.ebi.ac.uk/vol1/fastq/SRR214/006/SRR2148916/SRR2148916_1.fastq.gz	ftp://ftp.sra.ebi.ac.uk/vol1/fastq/SRR214/006/SRR2148916/SRR2148916_2.fastq.gz	source_name: Embryonic brain || brain region: Cortex || embryonic day: E80	cortex	unknown	80 day embryo	unknown
359	SRS1027245	Sus scrofa	PRJNA292166	SRR2148915	SRX1136474	RNA-Seq	cDNA	TRANSCRIPTOMIC	PAIRED	10.71	200	ILLUMINA	Illumina HiSeq 2000	https://sra-download.ncbi.nlm.nih.gov/traces/sra33/SRR/002098/SRR2148915	ftp://ftp.sra.ebi.ac.uk/vol1/fastq/SRR214/005/SRR2148915/SRR2148915_1.fastq.gz	ftp://ftp.sra.ebi.ac.uk/vol1/fastq/SRR214/005/SRR2148915/SRR2148915_2.fastq.gz	source_name: Embryonic brain || brain region: Cortex || embryonic day: E60	cortex	unknown	60 day embryo	unknown
360	SRS1027246	Sus scrofa	PRJNA292166	SRR2148914	SRX1136473	RNA-Seq	cDNA	TRANSCRIPTOMIC	PAIRED	13.35	200	ILLUMINA	Illumina HiSeq 2000	https://sra-download.ncbi.nlm.nih.gov/traces/sra33/SRR/002098/SRR2148914	ftp://ftp.sra.ebi.ac.uk/vol1/fastq/SRR214/004/SRR2148914/SRR2148914_1.fastq.gz	ftp://ftp.sra.ebi.ac.uk/vol1/fastq/SRR214/004/SRR2148914/SRR2148914_2.fastq.gz	source_name: Embryonic brain || brain region: Cortex || embryonic day: E42	cortex	unknown	42 day embryo	unknown
361	SRS1027247	Sus scrofa	PRJNA292166	SRR2148913	SRX1136472	RNA-Seq	cDNA	TRANSCRIPTOMIC	PAIRED	29.42	200	ILLUMINA	Illumina HiSeq 2000	https://sra-download.ncbi.nlm.nih.gov/traces/sra33/SRR/002098/SRR2148913	ftp://ftp.sra.ebi.ac.uk/vol1/fastq/SRR214/003/SRR2148913/SRR2148913_1.fastq.gz	ftp://ftp.sra.ebi.ac.uk/vol1/fastq/SRR214/003/SRR2148913/SRR2148913_2.fastq.gz	source_name: Embryonic brain || brain region: Forebrain || embryonic day: E23	forebrain	unknown	22 day embryo	unknown
362	SRS1045337	Sus scrofa	PRJNA293935	SRR2183570	SRX1164619	RNA-Seq	cDNA	TRANSCRIPTOMIC	PAIRED	43.93	100	ILLUMINA	Illumina HiSeq 2000	https://sra-download.ncbi.nlm.nih.gov/traces/sra33/SRR/002132/SRR2183570	ftp://ftp.sra.ebi.ac.uk/vol1/fastq/SRR218/000/SRR2183570/SRR2183570_1.fastq.gz	ftp://ftp.sra.ebi.ac.uk/vol1/fastq/SRR218/000/SRR2183570/SRR2183570_2.fastq.gz	source_name: no nursing_PND 0_uterus || breed: Crossbred (Landrace, Yorkshire, Duroc, Hampshire) || feeding: no nursing || tissue: uterus	uterus	Crossbred (Landrace, Yorkshire, Duroc, Hampshire)	unknown	unknown
363	SRS1045338	Sus scrofa	PRJNA293935	SRR2183569	SRX1164618	RNA-Seq	cDNA	TRANSCRIPTOMIC	PAIRED	59.89	100	ILLUMINA	Illumina HiSeq 2000	https://sra-download.ncbi.nlm.nih.gov/traces/sra33/SRR/002132/SRR2183569	ftp://ftp.sra.ebi.ac.uk/vol1/fastq/SRR218/009/SRR2183569/SRR2183569_1.fastq.gz	ftp://ftp.sra.ebi.ac.uk/vol1/fastq/SRR218/009/SRR2183569/SRR2183569_2.fastq.gz	source_name: no nursing_PND 0_uterus || breed: Crossbred (Landrace, Yorkshire, Duroc, Hampshire) || feeding: no nursing || tissue: uterus	uterus	Crossbred (Landrace, Yorkshire, Duroc, Hampshire)	unknown	unknown
364	SRS1045339	Sus scrofa	PRJNA293935	SRR2183568	SRX1164617	RNA-Seq	cDNA	TRANSCRIPTOMIC	PAIRED	29.47	100	ILLUMINA	Illumina HiSeq 2000	https://sra-download.ncbi.nlm.nih.gov/traces/sra33/SRR/002132/SRR2183568	ftp://ftp.sra.ebi.ac.uk/vol1/fastq/SRR218/008/SRR2183568/SRR2183568_1.fastq.gz	ftp://ftp.sra.ebi.ac.uk/vol1/fastq/SRR218/008/SRR2183568/SRR2183568_2.fastq.gz	source_name: no nursing_PND 0_uterus || breed: Crossbred (Landrace, Yorkshire, Duroc, Hampshire) || feeding: no nursing || tissue: uterus	uterus	Crossbred (Landrace, Yorkshire, Duroc, Hampshire)	unknown	unknown
365	SRS1045340	Sus scrofa	PRJNA293935	SRR2183567	SRX1164616	RNA-Seq	cDNA	TRANSCRIPTOMIC	PAIRED	31.92	100	ILLUMINA	Illumina HiSeq 2000	https://sra-download.ncbi.nlm.nih.gov/traces/sra33/SRR/002132/SRR2183567	ftp://ftp.sra.ebi.ac.uk/vol1/fastq/SRR218/007/SRR2183567/SRR2183567_1.fastq.gz	ftp://ftp.sra.ebi.ac.uk/vol1/fastq/SRR218/007/SRR2183567/SRR2183567_2.fastq.gz	source_name: no nursing_PND 0_uterus || breed: Crossbred (Landrace, Yorkshire, Duroc, Hampshire) || feeding: no nursing || tissue: uterus	uterus	Crossbred (Landrace, Yorkshire, Duroc, Hampshire)	unknown	unknown
366	SRS1045341	Sus scrofa	PRJNA293935	SRR2183566	SRX1164615	RNA-Seq	cDNA	TRANSCRIPTOMIC	PAIRED	54.03	100	ILLUMINA	Illumina HiSeq 2000	https://sra-download.ncbi.nlm.nih.gov/traces/sra33/SRR/002132/SRR2183566	ftp://ftp.sra.ebi.ac.uk/vol1/fastq/SRR218/006/SRR2183566/SRR2183566_1.fastq.gz	ftp://ftp.sra.ebi.ac.uk/vol1/fastq/SRR218/006/SRR2183566/SRR2183566_2.fastq.gz	source_name: replacer-fed_PND 2_uterus || breed: Crossbred (Landrace, Yorkshire, Duroc, Hampshire) || feeding: replacer-fed || tissue: uterus	uterus	Crossbred (Landrace, Yorkshire, Duroc, Hampshire)	unknown	unknown
367	SRS1045342	Sus scrofa	PRJNA293935	SRR2183565	SRX1164614	RNA-Seq	cDNA	TRANSCRIPTOMIC	PAIRED	47.5	100	ILLUMINA	Illumina HiSeq 2000	https://sra-download.ncbi.nlm.nih.gov/traces/sra33/SRR/002132/SRR2183565	ftp://ftp.sra.ebi.ac.uk/vol1/fastq/SRR218/005/SRR2183565/SRR2183565_1.fastq.gz	ftp://ftp.sra.ebi.ac.uk/vol1/fastq/SRR218/005/SRR2183565/SRR2183565_2.fastq.gz	source_name: replacer-fed_PND 2_uterus || breed: Crossbred (Landrace, Yorkshire, Duroc, Hampshire) || feeding: replacer-fed || tissue: uterus	uterus	Crossbred (Landrace, Yorkshire, Duroc, Hampshire)	unknown	unknown
368	SRS1045343	Sus scrofa	PRJNA293935	SRR2183564	SRX1164613	RNA-Seq	cDNA	TRANSCRIPTOMIC	PAIRED	49.8	100	ILLUMINA	Illumina HiSeq 2000	https://sra-download.ncbi.nlm.nih.gov/traces/sra33/SRR/002132/SRR2183564	ftp://ftp.sra.ebi.ac.uk/vol1/fastq/SRR218/004/SRR2183564/SRR2183564_1.fastq.gz	ftp://ftp.sra.ebi.ac.uk/vol1/fastq/SRR218/004/SRR2183564/SRR2183564_2.fastq.gz	source_name: replacer-fed_PND 2_uterus || breed: Crossbred (Landrace, Yorkshire, Duroc, Hampshire) || feeding: replacer-fed || tissue: uterus	uterus	Crossbred (Landrace, Yorkshire, Duroc, Hampshire)	unknown	unknown
369	SRS1045344	Sus scrofa	PRJNA293935	SRR2183563	SRX1164612	RNA-Seq	cDNA	TRANSCRIPTOMIC	PAIRED	40.57	100	ILLUMINA	Illumina HiSeq 2000	https://sra-download.ncbi.nlm.nih.gov/traces/sra33/SRR/002132/SRR2183563	ftp://ftp.sra.ebi.ac.uk/vol1/fastq/SRR218/003/SRR2183563/SRR2183563_1.fastq.gz	ftp://ftp.sra.ebi.ac.uk/vol1/fastq/SRR218/003/SRR2183563/SRR2183563_2.fastq.gz	source_name: replacer-fed_PND 2_uterus || breed: Crossbred (Landrace, Yorkshire, Duroc, Hampshire) || feeding: replacer-fed || tissue: uterus	uterus	Crossbred (Landrace, Yorkshire, Duroc, Hampshire)	unknown	unknown
370	SRS1045345	Sus scrofa	PRJNA293935	SRR2183562	SRX1164611	RNA-Seq	cDNA	TRANSCRIPTOMIC	PAIRED	57.77	100	ILLUMINA	Illumina HiSeq 2000	https://sra-download.ncbi.nlm.nih.gov/traces/sra33/SRR/002132/SRR2183562	ftp://ftp.sra.ebi.ac.uk/vol1/fastq/SRR218/002/SRR2183562/SRR2183562_1.fastq.gz	ftp://ftp.sra.ebi.ac.uk/vol1/fastq/SRR218/002/SRR2183562/SRR2183562_2.fastq.gz	source_name: nursed_PND 2_uterus || breed: Crossbred (Landrace, Yorkshire, Duroc, Hampshire) || feeding: nursed || tissue: uterus	uterus	Crossbred (Landrace, Yorkshire, Duroc, Hampshire)	unknown	unknown
371	SRS1045346	Sus scrofa	PRJNA293935	SRR2183561	SRX1164610	RNA-Seq	cDNA	TRANSCRIPTOMIC	PAIRED	57.52	100	ILLUMINA	Illumina HiSeq 2000	https://sra-download.ncbi.nlm.nih.gov/traces/sra33/SRR/002132/SRR2183561	ftp://ftp.sra.ebi.ac.uk/vol1/fastq/SRR218/001/SRR2183561/SRR2183561_1.fastq.gz	ftp://ftp.sra.ebi.ac.uk/vol1/fastq/SRR218/001/SRR2183561/SRR2183561_2.fastq.gz	source_name: nursed_PND 2_uterus || breed: Crossbred (Landrace, Yorkshire, Duroc, Hampshire) || feeding: nursed || tissue: uterus	uterus	Crossbred (Landrace, Yorkshire, Duroc, Hampshire)	unknown	unknown
372	SRS1045347	Sus scrofa	PRJNA293935	SRR2183560	SRX1164609	RNA-Seq	cDNA	TRANSCRIPTOMIC	PAIRED	71.07	100	ILLUMINA	Illumina HiSeq 2000	https://sra-download.ncbi.nlm.nih.gov/traces/sra33/SRR/002132/SRR2183560	ftp://ftp.sra.ebi.ac.uk/vol1/fastq/SRR218/000/SRR2183560/SRR2183560_1.fastq.gz	ftp://ftp.sra.ebi.ac.uk/vol1/fastq/SRR218/000/SRR2183560/SRR2183560_2.fastq.gz	source_name: nursed_PND 2_uterus || breed: Crossbred (Landrace, Yorkshire, Duroc, Hampshire) || feeding: nursed || tissue: uterus	uterus	Crossbred (Landrace, Yorkshire, Duroc, Hampshire)	unknown	unknown
373	SRS1045348	Sus scrofa	PRJNA293935	SRR2183559	SRX1164608	RNA-Seq	cDNA	TRANSCRIPTOMIC	PAIRED	48.1	100	ILLUMINA	Illumina HiSeq 2000	https://sra-download.ncbi.nlm.nih.gov/traces/sra33/SRR/002132/SRR2183559	ftp://ftp.sra.ebi.ac.uk/vol1/fastq/SRR218/009/SRR2183559/SRR2183559_1.fastq.gz	ftp://ftp.sra.ebi.ac.uk/vol1/fastq/SRR218/009/SRR2183559/SRR2183559_2.fastq.gz	source_name: nursed_PND 2_uterus || breed: Crossbred (Landrace, Yorkshire, Duroc, Hampshire) || feeding: nursed || tissue: uterus	uterus	Crossbred (Landrace, Yorkshire, Duroc, Hampshire)	unknown	unknown
374	SRS1094450	Sus scrofa	PRJNA297337	SRR2536884	SRX1295674	RNA-Seq	cDNA	TRANSCRIPTOMIC	PAIRED	30.49	152	ILLUMINA	Illumina HiSeq 2000		ftp://ftp.sra.ebi.ac.uk/vol1/fastq/SRR253/004/SRR2536884/SRR2536884_1.fastq.gz	ftp://ftp.sra.ebi.ac.uk/vol1/fastq/SRR253/004/SRR2536884/SRR2536884_2.fastq.gz	source_name: Biceps femoris muscle_Iberian x Duroc || age: postnatal day 1 || Sex: male || strain: crossbred Iberian x Duroc || tissue: Biceps femoris muscle	Biceps femoris muscle	crossbred Iberian x Duroc	postnatal day 1	male
375	SRS1094451	Sus scrofa	PRJNA297337	SRR2536883	SRX1295673	RNA-Seq	cDNA	TRANSCRIPTOMIC	PAIRED	31.63	152	ILLUMINA	Illumina HiSeq 2000		ftp://ftp.sra.ebi.ac.uk/vol1/fastq/SRR253/003/SRR2536883/SRR2536883_1.fastq.gz	ftp://ftp.sra.ebi.ac.uk/vol1/fastq/SRR253/003/SRR2536883/SRR2536883_2.fastq.gz	source_name: Biceps femoris muscle_Iberian x Duroc || age: postnatal day 1 || Sex: male || strain: crossbred Iberian x Duroc || tissue: Biceps femoris muscle	Biceps femoris muscle	crossbred Iberian x Duroc	postnatal day 1	male
376	SRS1094452	Sus scrofa	PRJNA297337	SRR2536882	SRX1295672	RNA-Seq	cDNA	TRANSCRIPTOMIC	PAIRED	51.76	152	ILLUMINA	Illumina HiSeq 2000		ftp://ftp.sra.ebi.ac.uk/vol1/fastq/SRR253/002/SRR2536882/SRR2536882_1.fastq.gz	ftp://ftp.sra.ebi.ac.uk/vol1/fastq/SRR253/002/SRR2536882/SRR2536882_2.fastq.gz	source_name: Biceps femoris muscle_Iberian x Duroc || age: postnatal day 1 || Sex: male || strain: crossbred Iberian x Duroc || tissue: Biceps femoris muscle	Biceps femoris muscle	crossbred Iberian x Duroc	postnatal day 1	male
377	SRS1094453	Sus scrofa	PRJNA297337	SRR2536880	SRX1295670	RNA-Seq	cDNA	TRANSCRIPTOMIC	PAIRED	35.21	152	ILLUMINA	Illumina HiSeq 2000		ftp://ftp.sra.ebi.ac.uk/vol1/fastq/SRR253/000/SRR2536880/SRR2536880_1.fastq.gz	ftp://ftp.sra.ebi.ac.uk/vol1/fastq/SRR253/000/SRR2536880/SRR2536880_2.fastq.gz	source_name: Biceps femoris muscle_Iberian x Duroc || age: postnatal day 1 || Sex: male || strain: crossbred Iberian x Duroc || tissue: Biceps femoris muscle	Biceps femoris muscle	crossbred Iberian x Duroc	postnatal day 1	male
378	SRS1094454	Sus scrofa	PRJNA297337	SRR2536879	SRX1295669	RNA-Seq	cDNA	TRANSCRIPTOMIC	PAIRED	27.73	152	ILLUMINA	Illumina HiSeq 2000		ftp://ftp.sra.ebi.ac.uk/vol1/fastq/SRR253/009/SRR2536879/SRR2536879_1.fastq.gz	ftp://ftp.sra.ebi.ac.uk/vol1/fastq/SRR253/009/SRR2536879/SRR2536879_2.fastq.gz	source_name: Biceps femoris muscle_Iberian x Duroc || age: postnatal day 1 || Sex: male || strain: crossbred Iberian x Duroc || tissue: Biceps femoris muscle	Biceps femoris muscle	crossbred Iberian x Duroc	postnatal day 1	male
379	SRS1094455	Sus scrofa	PRJNA297337	SRR2536881	SRX1295671	RNA-Seq	cDNA	TRANSCRIPTOMIC	PAIRED	42.86	152	ILLUMINA	Illumina HiSeq 2000		ftp://ftp.sra.ebi.ac.uk/vol1/fastq/SRR253/001/SRR2536881/SRR2536881_1.fastq.gz	ftp://ftp.sra.ebi.ac.uk/vol1/fastq/SRR253/001/SRR2536881/SRR2536881_2.fastq.gz	source_name: Biceps femoris muscle_Iberian x Duroc || age: postnatal day 1 || Sex: male || strain: crossbred Iberian x Duroc || tissue: Biceps femoris muscle	Biceps femoris muscle	crossbred Iberian x Duroc	postnatal day 1	male
380	SRS1094456	Sus scrofa	PRJNA297337	SRR2536878	SRX1295668	RNA-Seq	cDNA	TRANSCRIPTOMIC	PAIRED	29.06	152	ILLUMINA	Illumina HiSeq 2000		ftp://ftp.sra.ebi.ac.uk/vol1/fastq/SRR253/008/SRR2536878/SRR2536878_1.fastq.gz	ftp://ftp.sra.ebi.ac.uk/vol1/fastq/SRR253/008/SRR2536878/SRR2536878_2.fastq.gz	source_name: Biceps femoris muscle_Iberian || age: postnatal day 1 || Sex: male || strain: pure Iberian || tissue: Biceps femoris muscle	Biceps femoris muscle	pure Iberian	postnatal day 1	male
381	SRS1094457	Sus scrofa	PRJNA297337	SRR2536876	SRX1295666	RNA-Seq	cDNA	TRANSCRIPTOMIC	PAIRED	38.34	152	ILLUMINA	Illumina HiSeq 2000		ftp://ftp.sra.ebi.ac.uk/vol1/fastq/SRR253/006/SRR2536876/SRR2536876_1.fastq.gz	ftp://ftp.sra.ebi.ac.uk/vol1/fastq/SRR253/006/SRR2536876/SRR2536876_2.fastq.gz	source_name: Biceps femoris muscle_Iberian || age: postnatal day 1 || Sex: male || strain: pure Iberian || tissue: Biceps femoris muscle	Biceps femoris muscle	pure Iberian	postnatal day 1	male
382	SRS1094458	Sus scrofa	PRJNA297337	SRR2536877	SRX1295667	RNA-Seq	cDNA	TRANSCRIPTOMIC	PAIRED	48.28	152	ILLUMINA	Illumina HiSeq 2000		ftp://ftp.sra.ebi.ac.uk/vol1/fastq/SRR253/007/SRR2536877/SRR2536877_1.fastq.gz	ftp://ftp.sra.ebi.ac.uk/vol1/fastq/SRR253/007/SRR2536877/SRR2536877_2.fastq.gz	source_name: Biceps femoris muscle_Iberian || age: postnatal day 1 || Sex: male || strain: pure Iberian || tissue: Biceps femoris muscle	Biceps femoris muscle	pure Iberian	postnatal day 1	male
383	SRS1094459	Sus scrofa	PRJNA297337	SRR2536875	SRX1295665	RNA-Seq	cDNA	TRANSCRIPTOMIC	PAIRED	36.49	152	ILLUMINA	Illumina HiSeq 2000		ftp://ftp.sra.ebi.ac.uk/vol1/fastq/SRR253/005/SRR2536875/SRR2536875_1.fastq.gz	ftp://ftp.sra.ebi.ac.uk/vol1/fastq/SRR253/005/SRR2536875/SRR2536875_2.fastq.gz	source_name: Biceps femoris muscle_Iberian || age: postnatal day 1 || Sex: male || strain: pure Iberian || tissue: Biceps femoris muscle	Biceps femoris muscle	pure Iberian	postnatal day 1	male
384	SRS1094460	Sus scrofa	PRJNA297337	SRR2536874	SRX1295664	RNA-Seq	cDNA	TRANSCRIPTOMIC	PAIRED	37.29	152	ILLUMINA	Illumina HiSeq 2000		ftp://ftp.sra.ebi.ac.uk/vol1/fastq/SRR253/004/SRR2536874/SRR2536874_1.fastq.gz	ftp://ftp.sra.ebi.ac.uk/vol1/fastq/SRR253/004/SRR2536874/SRR2536874_2.fastq.gz	source_name: Biceps femoris muscle_Iberian || age: postnatal day 1 || Sex: male || strain: pure Iberian || tissue: Biceps femoris muscle	Biceps femoris muscle	pure Iberian	postnatal day 1	male
385	SRS1094461	Sus scrofa	PRJNA297337	SRR2536873	SRX1295663	RNA-Seq	cDNA	TRANSCRIPTOMIC	PAIRED	36.75	152	ILLUMINA	Illumina HiSeq 2000		ftp://ftp.sra.ebi.ac.uk/vol1/fastq/SRR253/003/SRR2536873/SRR2536873_1.fastq.gz	ftp://ftp.sra.ebi.ac.uk/vol1/fastq/SRR253/003/SRR2536873/SRR2536873_2.fastq.gz	source_name: Biceps femoris muscle_Iberian || age: postnatal day 1 || Sex: male || strain: pure Iberian || tissue: Biceps femoris muscle	Biceps femoris muscle	pure Iberian	postnatal day 1	male
386	SRS1094779	Sus scrofa	PRJNA297376	SRR2537256	SRX1295814	RNA-Seq	cDNA	TRANSCRIPTOMIC	PAIRED	41.7	250	ILLUMINA	Illumina HiSeq 2500		ftp://ftp.sra.ebi.ac.uk/vol1/fastq/SRR253/006/SRR2537256/SRR2537256_1.fastq.gz	ftp://ftp.sra.ebi.ac.uk/vol1/fastq/SRR253/006/SRR2537256/SRR2537256_2.fastq.gz	source_name: Large White, ovary, 49 days post coitus, rep2 || breed: Large White || tissue: ovary || time: 49 days post coitus	ovary	Large White	unknown	unknown
387	SRS1094780	Sus scrofa	PRJNA297376	SRR2537257	SRX1295815	RNA-Seq	cDNA	TRANSCRIPTOMIC	PAIRED	41.99	250	ILLUMINA	Illumina HiSeq 2500		ftp://ftp.sra.ebi.ac.uk/vol1/fastq/SRR253/007/SRR2537257/SRR2537257_1.fastq.gz	ftp://ftp.sra.ebi.ac.uk/vol1/fastq/SRR253/007/SRR2537257/SRR2537257_2.fastq.gz	source_name: Large White, ovary, 49 days post coitus, rep3 || breed: Large White || tissue: ovary || time: 49 days post coitus	ovary	Large White	unknown	unknown
388	SRS1094781	Sus scrofa	PRJNA297376	SRR2537255	SRX1295813	RNA-Seq	cDNA	TRANSCRIPTOMIC	PAIRED	39.39	250	ILLUMINA	Illumina HiSeq 2500		ftp://ftp.sra.ebi.ac.uk/vol1/fastq/SRR253/005/SRR2537255/SRR2537255_1.fastq.gz	ftp://ftp.sra.ebi.ac.uk/vol1/fastq/SRR253/005/SRR2537255/SRR2537255_2.fastq.gz	source_name: Large White, ovary, 49 days post coitus, rep1 || breed: Large White || tissue: ovary || time: 49 days post coitus	ovary	Large White	unknown	unknown
389	SRS1094782	Sus scrofa	PRJNA297376	SRR2537254	SRX1295812	RNA-Seq	cDNA	TRANSCRIPTOMIC	PAIRED	44.86	250	ILLUMINA	Illumina HiSeq 2500		ftp://ftp.sra.ebi.ac.uk/vol1/fastq/SRR253/004/SRR2537254/SRR2537254_1.fastq.gz	ftp://ftp.sra.ebi.ac.uk/vol1/fastq/SRR253/004/SRR2537254/SRR2537254_2.fastq.gz	source_name: Meishan, ovary, 49 days post coitus, rep3 || breed: Meishan || tissue: ovary || time: 49 days post coitus	ovary	Meishan	unknown	unknown
390	SRS1094783	Sus scrofa	PRJNA297376	SRR2537252	SRX1295810	RNA-Seq	cDNA	TRANSCRIPTOMIC	PAIRED	41.06	250	ILLUMINA	Illumina HiSeq 2500		ftp://ftp.sra.ebi.ac.uk/vol1/fastq/SRR253/002/SRR2537252/SRR2537252_1.fastq.gz	ftp://ftp.sra.ebi.ac.uk/vol1/fastq/SRR253/002/SRR2537252/SRR2537252_2.fastq.gz	source_name: Meishan, ovary, 49 days post coitus, rep1 || breed: Meishan || tissue: ovary || time: 49 days post coitus	ovary	Meishan	unknown	unknown
391	SRS1094784	Sus scrofa	PRJNA297376	SRR2537253	SRX1295811	RNA-Seq	cDNA	TRANSCRIPTOMIC	PAIRED	41.83	250	ILLUMINA	Illumina HiSeq 2500		ftp://ftp.sra.ebi.ac.uk/vol1/fastq/SRR253/003/SRR2537253/SRR2537253_1.fastq.gz	ftp://ftp.sra.ebi.ac.uk/vol1/fastq/SRR253/003/SRR2537253/SRR2537253_2.fastq.gz	source_name: Meishan, ovary, 49 days post coitus, rep2 || breed: Meishan || tissue: ovary || time: 49 days post coitus	ovary	Meishan	unknown	unknown
392	SRS1097794	Sus scrofa	PRJNA297678	SRR2550376	SRX1301560	RNA-Seq	cDNA	TRANSCRIPTOMIC	PAIRED	24.5	200	ILLUMINA	Illumina HiSeq 2000		ftp://ftp.sra.ebi.ac.uk/vol1/fastq/SRR255/006/SRR2550376/SRR2550376_1.fastq.gz	ftp://ftp.sra.ebi.ac.uk/vol1/fastq/SRR255/006/SRR2550376/SRR2550376_2.fastq.gz	source_name: Endometrium || tissue: Endometrium of pregnancy || Stage: Day 25 of pregnancy	Endometrium of pregnancy	unknown	Day 25 of pregnancy	unknown
393	SRS1097795	Sus scrofa	PRJNA297678	SRR2550375	SRX1301559	RNA-Seq	cDNA	TRANSCRIPTOMIC	PAIRED	20.41	200	ILLUMINA	Illumina HiSeq 2000		ftp://ftp.sra.ebi.ac.uk/vol1/fastq/SRR255/005/SRR2550375/SRR2550375_1.fastq.gz	ftp://ftp.sra.ebi.ac.uk/vol1/fastq/SRR255/005/SRR2550375/SRR2550375_2.fastq.gz	source_name: Endometrium || tissue: Endometrium of pregnancy || Stage: Day 18 of pregnancy	Endometrium of pregnancy	unknown	Day 18 of pregnancy	unknown
394	SRS1097796	Sus scrofa	PRJNA297678	SRR2550374	SRX1301558	RNA-Seq	cDNA	TRANSCRIPTOMIC	PAIRED	19.66	200	ILLUMINA	Illumina HiSeq 2000		ftp://ftp.sra.ebi.ac.uk/vol1/fastq/SRR255/004/SRR2550374/SRR2550374_1.fastq.gz	ftp://ftp.sra.ebi.ac.uk/vol1/fastq/SRR255/004/SRR2550374/SRR2550374_2.fastq.gz	source_name: Endometrium || tissue: Endometrium of pregnancy || Stage: Day 12 of pregnancy	Endometrium of pregnancy	unknown	Day 12 of pregnancy	unknown
395	SRS1100806	Sus scrofa	PRJNA297855	SRR2564763	SRX1307219	RNA-Seq	cDNA	TRANSCRIPTOMIC	PAIRED	11.67	200	ILLUMINA	Illumina HiSeq 2000		ftp://ftp.sra.ebi.ac.uk/vol1/fastq/SRR256/003/SRR2564763/SRR2564763_1.fastq.gz	ftp://ftp.sra.ebi.ac.uk/vol1/fastq/SRR256/003/SRR2564763/SRR2564763_2.fastq.gz	source_name: ovary, postnatal 240 days || breed: Guizhou mini-pigs || age: postnatal 240 days || tissue: ovary	ovary	Guizhou mini-pigs	postnatal 240 days	unknown
395	SRS1100806	Sus scrofa	PRJNA297855	SRR2564765	SRX1307219	RNA-Seq	cDNA	TRANSCRIPTOMIC	PAIRED	16.85	300	ILLUMINA	Illumina HiSeq 2000		ftp://ftp.sra.ebi.ac.uk/vol1/fastq/SRR256/005/SRR2564765/SRR2564765_1.fastq.gz	ftp://ftp.sra.ebi.ac.uk/vol1/fastq/SRR256/005/SRR2564765/SRR2564765_2.fastq.gz	source_name: ovary, postnatal 240 days || breed: Guizhou mini-pigs || age: postnatal 240 days || tissue: ovary	ovary	Guizhou mini-pigs	postnatal 240 days	unknown
396	SRS1100807	Sus scrofa	PRJNA297855	SRR2564762	SRX1307218	RNA-Seq	cDNA	TRANSCRIPTOMIC	PAIRED	41.86	200	ILLUMINA	Illumina HiSeq 2000	https://sra-download.ncbi.nlm.nih.gov/traces/sra14/SRR/002504/SRR2564762	ftp://ftp.sra.ebi.ac.uk/vol1/fastq/SRR256/002/SRR2564762/SRR2564762_1.fastq.gz	ftp://ftp.sra.ebi.ac.uk/vol1/fastq/SRR256/002/SRR2564762/SRR2564762_2.fastq.gz	source_name: testis, postnatal 240 days || breed: Guizhou mini-pigs || age: postnatal 240 days || tissue: testis	testis	Guizhou mini-pigs	postnatal 240 days	unknown
397	SRS1100808	Sus scrofa	PRJNA297855	SRR2564760	SRX1307216	RNA-Seq	cDNA	TRANSCRIPTOMIC	PAIRED	39.79	200	ILLUMINA	Illumina HiSeq 2000		ftp://ftp.sra.ebi.ac.uk/vol1/fastq/SRR256/000/SRR2564760/SRR2564760_1.fastq.gz	ftp://ftp.sra.ebi.ac.uk/vol1/fastq/SRR256/000/SRR2564760/SRR2564760_2.fastq.gz	source_name: lung, postnatal 240 days || breed: Guizhou mini-pigs || age: postnatal 240 days || tissue: lung	lung	Guizhou mini-pigs	postnatal 240 days	unknown
398	SRS1100809	Sus scrofa	PRJNA297855	SRR2564761	SRX1307217	RNA-Seq	cDNA	TRANSCRIPTOMIC	PAIRED	39.38	200	ILLUMINA	Illumina HiSeq 2000		ftp://ftp.sra.ebi.ac.uk/vol1/fastq/SRR256/001/SRR2564761/SRR2564761_1.fastq.gz	ftp://ftp.sra.ebi.ac.uk/vol1/fastq/SRR256/001/SRR2564761/SRR2564761_2.fastq.gz	source_name: kindey, postnatal 240 days || breed: Guizhou mini-pigs || age: postnatal 240 days || tissue: kindey	kidney	Guizhou mini-pigs	postnatal 240 days	unknown
399	SRS1100810	Sus scrofa	PRJNA297855	SRR2564758	SRX1307214	RNA-Seq	cDNA	TRANSCRIPTOMIC	PAIRED	36.15	200	ILLUMINA	Illumina HiSeq 2000		ftp://ftp.sra.ebi.ac.uk/vol1/fastq/SRR256/008/SRR2564758/SRR2564758_1.fastq.gz	ftp://ftp.sra.ebi.ac.uk/vol1/fastq/SRR256/008/SRR2564758/SRR2564758_2.fastq.gz	source_name: liver, postnatal 240 days || breed: Guizhou mini-pigs || age: postnatal 240 days || tissue: liver	liver	Guizhou mini-pigs	postnatal 240 days	unknown
400	SRS1100811	Sus scrofa	PRJNA297855	SRR2564759	SRX1307215	RNA-Seq	cDNA	TRANSCRIPTOMIC	PAIRED	39.02	200	ILLUMINA	Illumina HiSeq 2000	https://sra-download.ncbi.nlm.nih.gov/traces/sra14/SRR/002504/SRR2564759	ftp://ftp.sra.ebi.ac.uk/vol1/fastq/SRR256/009/SRR2564759/SRR2564759_1.fastq.gz	ftp://ftp.sra.ebi.ac.uk/vol1/fastq/SRR256/009/SRR2564759/SRR2564759_2.fastq.gz	source_name: spleen, postnatal 240 days || breed: Guizhou mini-pigs || age: postnatal 240 days || tissue: spleen	spleen	Guizhou mini-pigs	postnatal 240 days	unknown
401	SRS1100812	Sus scrofa	PRJNA297855	SRR2564757	SRX1307213	RNA-Seq	cDNA	TRANSCRIPTOMIC	PAIRED	38.56	200	ILLUMINA	Illumina HiSeq 2000		ftp://ftp.sra.ebi.ac.uk/vol1/fastq/SRR256/007/SRR2564757/SRR2564757_1.fastq.gz	ftp://ftp.sra.ebi.ac.uk/vol1/fastq/SRR256/007/SRR2564757/SRR2564757_2.fastq.gz	source_name: heart, postnatal 240 days || breed: Guizhou mini-pigs || age: postnatal 240 days || tissue: heart	heart	Guizhou mini-pigs	postnatal 240 days	unknown
402	SRS1100814	Sus scrofa	PRJNA297855	SRR2564774	SRX1307225	RNA-Seq	cDNA	TRANSCRIPTOMIC	PAIRED	76.46	180	ILLUMINA	Illumina Genome Analyzer II	https://sra-download.ncbi.nlm.nih.gov/traces/sra14/SRR/002504/SRR2564774	ftp://ftp.sra.ebi.ac.uk/vol1/fastq/SRR256/004/SRR2564774/SRR2564774_1.fastq.gz	ftp://ftp.sra.ebi.ac.uk/vol1/fastq/SRR256/004/SRR2564774/SRR2564774_2.fastq.gz	source_name: multiple muscle tissues || breed: multiple breeds || age: multiple time points || tissue: longissimus dorsi	longissimus dorsi muscle	multiple breeds	multiple time points	unknown
403	SRS1100815	Sus scrofa	PRJNA297855	SRR2564773	SRX1307224	RNA-Seq	cDNA	TRANSCRIPTOMIC	PAIRED	125.49	180	ILLUMINA	Illumina Genome Analyzer II	https://sra-download.ncbi.nlm.nih.gov/traces/sra14/SRR/002504/SRR2564773	ftp://ftp.sra.ebi.ac.uk/vol1/fastq/SRR256/003/SRR2564773/SRR2564773_1.fastq.gz	ftp://ftp.sra.ebi.ac.uk/vol1/fastq/SRR256/003/SRR2564773/SRR2564773_2.fastq.gz	source_name: multiple tissues || breed: multiple breeds || age: multiple time points || tissue: multiple tissues	mixture of multiple tissues	multiple breeds	multiple time points	unknown
404	SRS1100816	Sus scrofa	PRJNA297855	SRR2564771	SRX1307223	RNA-Seq	cDNA	TRANSCRIPTOMIC	PAIRED	18.83	200	ILLUMINA	Illumina HiSeq 2000		ftp://ftp.sra.ebi.ac.uk/vol1/fastq/SRR256/001/SRR2564771/SRR2564771_1.fastq.gz	ftp://ftp.sra.ebi.ac.uk/vol1/fastq/SRR256/001/SRR2564771/SRR2564771_2.fastq.gz	source_name: longissimus dorsi, postnatal 240 days || breed: Guizhou mini-pigs || age: postnatal 240 days || tissue: longissimus dorsi	longissimus dorsi muscle	Guizhou mini-pigs	postnatal 240 days	unknown
404	SRS1100816	Sus scrofa	PRJNA297855	SRR2564772	SRX1307223	RNA-Seq	cDNA	TRANSCRIPTOMIC	PAIRED	17.94	200	ILLUMINA	Illumina HiSeq 2000		ftp://ftp.sra.ebi.ac.uk/vol1/fastq/SRR256/002/SRR2564772/SRR2564772_1.fastq.gz	ftp://ftp.sra.ebi.ac.uk/vol1/fastq/SRR256/002/SRR2564772/SRR2564772_2.fastq.gz	source_name: longissimus dorsi, postnatal 240 days || breed: Guizhou mini-pigs || age: postnatal 240 days || tissue: longissimus dorsi	longissimus dorsi muscle	Guizhou mini-pigs	postnatal 240 days	unknown
405	SRS1100817	Sus scrofa	PRJNA297855	SRR2564769	SRX1307222	RNA-Seq	cDNA	TRANSCRIPTOMIC	PAIRED	29.1	200	ILLUMINA	Illumina HiSeq 2000		ftp://ftp.sra.ebi.ac.uk/vol1/fastq/SRR256/009/SRR2564769/SRR2564769_1.fastq.gz	ftp://ftp.sra.ebi.ac.uk/vol1/fastq/SRR256/009/SRR2564769/SRR2564769_2.fastq.gz	source_name: longissimus dorsi, postnatal 30 days || breed: Guizhou mini-pigs || age: postnatal 30 days || tissue: longissimus dorsi	longissimus dorsi muscle	Guizhou mini-pigs	postnatal 30 days	unknown
406	SRS1100818	Sus scrofa	PRJNA297855	SRR2564767	SRX1307221	RNA-Seq	cDNA	TRANSCRIPTOMIC	PAIRED	33.22	200	ILLUMINA	Illumina HiSeq 2000		ftp://ftp.sra.ebi.ac.uk/vol1/fastq/SRR256/007/SRR2564767/SRR2564767_1.fastq.gz	ftp://ftp.sra.ebi.ac.uk/vol1/fastq/SRR256/007/SRR2564767/SRR2564767_2.fastq.gz	source_name: longissimus dorsi, postnatal 0 days || breed: Guizhou mini-pigs || age: postnatal 0 days || tissue: longissimus dorsi	longissimus dorsi muscle	Guizhou mini-pigs	postnatal 0 days	unknown
407	SRS1100819	Sus scrofa	PRJNA297855	SRR2564766	SRX1307220	RNA-Seq	cDNA	TRANSCRIPTOMIC	PAIRED	40	200	ILLUMINA	Illumina HiSeq 2000		ftp://ftp.sra.ebi.ac.uk/vol1/fastq/SRR256/006/SRR2564766/SRR2564766_1.fastq.gz	ftp://ftp.sra.ebi.ac.uk/vol1/fastq/SRR256/006/SRR2564766/SRR2564766_2.fastq.gz	source_name: adipose, postnatal 240 days || breed: Guizhou mini-pigs || age: postnatal 240 days || tissue: adipose	adipose	Guizhou mini-pigs	postnatal 240 days	unknown
408	SRS1167078	Sus scrofa	PRJNA302066	SRR2924899	SRX1438217	RNA-Seq	cDNA	TRANSCRIPTOMIC	PAIRED	86.72	100	ILLUMINA	Illumina HiSeq 2000	https://sra-download.ncbi.nlm.nih.gov/traces/sra36/SRR/002856/SRR2924899	ftp://ftp.sra.ebi.ac.uk/vol1/fastq/SRR292/009/SRR2924899/SRR2924899_1.fastq.gz	ftp://ftp.sra.ebi.ac.uk/vol1/fastq/SRR292/009/SRR2924899/SRR2924899_2.fastq.gz	collection_date: 2015-10-10 || sample_type: single cell || tissue: kidney || geo_loc_name: China || isolation_source: pig kidney cell lines || strain: Asia1 type foot-and-mouth disease virus jiangsu strain || BioSampleModel: Microbe, viral or environmental	kidney	Asia1 type foot-and-mouth disease virus jiangsu strain	unknown	unknown
409	SRS1168887	Sus scrofa	PRJNA302066	SRR2924891	SRX1438204	RNA-Seq	cDNA	TRANSCRIPTOMIC	PAIRED	86.72	100	ILLUMINA	Illumina HiSeq 2000	https://sra-download.ncbi.nlm.nih.gov/traces/sra36/SRR/002856/SRR2924891	ftp://ftp.sra.ebi.ac.uk/vol1/fastq/SRR292/001/SRR2924891/SRR2924891_1.fastq.gz	ftp://ftp.sra.ebi.ac.uk/vol1/fastq/SRR292/001/SRR2924891/SRR2924891_2.fastq.gz	collection_date: 2015-10-10 || sample_type: single cell || tissue: kidney || geo_loc_name: China || isolation_source: pig kidney cell lines || strain: Asia1 type foot-and-mouth disease virus jiangsu strain || BioSampleModel: Microbe, viral or environmental	kidney	Asia1 type foot-and-mouth disease virus jiangsu strain	unknown	unknown
410	SRS1164589	Sus scrofa	PRJNA302287	SRR2919662	SRX1433605	RNA-Seq	cDNA	TRANSCRIPTOMIC	PAIRED	36.15	200	ILLUMINA	Illumina HiSeq 2500	https://sra-download.ncbi.nlm.nih.gov/traces/sra35/SRR/002851/SRR2919662	ftp://ftp.sra.ebi.ac.uk/vol1/fastq/SRR291/002/SRR2919662/SRR2919662_1.fastq.gz	ftp://ftp.sra.ebi.ac.uk/vol1/fastq/SRR291/002/SRR2919662/SRR2919662_2.fastq.gz	source_name: longissimus dorsi muscle || breed: Yorkshire || age: 5 months old	longissimus dorsi muscle	Yorkshire	5 months	unknown
411	SRS1164590	Sus scrofa	PRJNA302287	SRR2919661	SRX1433604	RNA-Seq	cDNA	TRANSCRIPTOMIC	PAIRED	34.13	200	ILLUMINA	Illumina HiSeq 2500	https://sra-download.ncbi.nlm.nih.gov/traces/sra35/SRR/002851/SRR2919661	ftp://ftp.sra.ebi.ac.uk/vol1/fastq/SRR291/001/SRR2919661/SRR2919661_1.fastq.gz	ftp://ftp.sra.ebi.ac.uk/vol1/fastq/SRR291/001/SRR2919661/SRR2919661_2.fastq.gz	source_name: longissimus dorsi muscle || breed: Yorkshire || age: 5 months old	longissimus dorsi muscle	Yorkshire	5 months	unknown
412	SRS1164591	Sus scrofa	PRJNA302287	SRR2919660	SRX1433603	RNA-Seq	cDNA	TRANSCRIPTOMIC	PAIRED	28.98	200	ILLUMINA	Illumina HiSeq 2500	https://sra-download.ncbi.nlm.nih.gov/traces/sra35/SRR/002851/SRR2919660	ftp://ftp.sra.ebi.ac.uk/vol1/fastq/SRR291/000/SRR2919660/SRR2919660_1.fastq.gz	ftp://ftp.sra.ebi.ac.uk/vol1/fastq/SRR291/000/SRR2919660/SRR2919660_2.fastq.gz	source_name: longissimus dorsi muscle || breed: Yorkshire || age: 5 months old	longissimus dorsi muscle	Yorkshire	5 months	unknown
413	SRS1164592	Sus scrofa	PRJNA302287	SRR2919659	SRX1433602	RNA-Seq	cDNA	TRANSCRIPTOMIC	PAIRED	29.62	200	ILLUMINA	Illumina HiSeq 2500	https://sra-download.ncbi.nlm.nih.gov/traces/sra35/SRR/002851/SRR2919659	ftp://ftp.sra.ebi.ac.uk/vol1/fastq/SRR291/009/SRR2919659/SRR2919659_1.fastq.gz	ftp://ftp.sra.ebi.ac.uk/vol1/fastq/SRR291/009/SRR2919659/SRR2919659_2.fastq.gz	source_name: longissimus dorsi muscle || breed: Wannanhua || age: 5 months old	longissimus dorsi muscle	Wannanhua	5 months	unknown
414	SRS1164593	Sus scrofa	PRJNA302287	SRR2919658	SRX1433601	RNA-Seq	cDNA	TRANSCRIPTOMIC	PAIRED	32.16	200	ILLUMINA	Illumina HiSeq 2500	https://sra-download.ncbi.nlm.nih.gov/traces/sra35/SRR/002851/SRR2919658	ftp://ftp.sra.ebi.ac.uk/vol1/fastq/SRR291/008/SRR2919658/SRR2919658_1.fastq.gz	ftp://ftp.sra.ebi.ac.uk/vol1/fastq/SRR291/008/SRR2919658/SRR2919658_2.fastq.gz	source_name: longissimus dorsi muscle || breed: Wannanhua || age: 5 months old	longissimus dorsi muscle	Wannanhua	5 months	unknown
415	SRS1164594	Sus scrofa	PRJNA302287	SRR2919657	SRX1433600	RNA-Seq	cDNA	TRANSCRIPTOMIC	PAIRED	32.29	200	ILLUMINA	Illumina HiSeq 2500	https://sra-download.ncbi.nlm.nih.gov/traces/sra35/SRR/002851/SRR2919657	ftp://ftp.sra.ebi.ac.uk/vol1/fastq/SRR291/007/SRR2919657/SRR2919657_1.fastq.gz	ftp://ftp.sra.ebi.ac.uk/vol1/fastq/SRR291/007/SRR2919657/SRR2919657_2.fastq.gz	source_name: longissimus dorsi muscle || breed: Wannanhua || age: 5 months old	longissimus dorsi muscle	Wannanhua	5 months	unknown
416	SRS1181337	Sus scrofa	PRJNA304281	SRR2962734	SRX1453473	RNA-Seq	cDNA	TRANSCRIPTOMIC	PAIRED	191.53	300	ILLUMINA	Illumina HiSeq 4000	https://sra-download.ncbi.nlm.nih.gov/traces/sra36/SRR/002893/SRR2962734	ftp://ftp.sra.ebi.ac.uk/vol1/fastq/SRR296/004/SRR2962734/SRR2962734_1.fastq.gz	ftp://ftp.sra.ebi.ac.uk/vol1/fastq/SRR296/004/SRR2962734/SRR2962734_2.fastq.gz	breed: big white || age: 1 || sex: male || tissue: kidney || BioSampleModel: Model organism or animal	kidney	big white	1	male
417	SRS1198656	Sus scrofa	PRJNA305529	SRR2983656	SRX1472845	RNA-Seq	cDNA	TRANSCRIPTOMIC	PAIRED	14.3	152	ILLUMINA	Illumina HiSeq 2000	https://sra-download.ncbi.nlm.nih.gov/traces/sra37/SRR/002913/SRR2983656	ftp://ftp.sra.ebi.ac.uk/vol1/fastq/SRR298/006/SRR2983656/SRR2983656_1.fastq.gz	ftp://ftp.sra.ebi.ac.uk/vol1/fastq/SRR298/006/SRR2983656/SRR2983656_2.fastq.gz	source_name: Liver || age: 175 || Sex: male || phenotype: low growth and fatness || tissue: liver	liver	unknown	175	male
417	SRS1198656	Sus scrofa	PRJNA305529	SRR2983658	SRX1472845	RNA-Seq	cDNA	TRANSCRIPTOMIC	PAIRED	17.34	152	ILLUMINA	Illumina HiSeq 2000	https://sra-download.ncbi.nlm.nih.gov/traces/sra37/SRR/002913/SRR2983658	ftp://ftp.sra.ebi.ac.uk/vol1/fastq/SRR298/008/SRR2983658/SRR2983658_1.fastq.gz	ftp://ftp.sra.ebi.ac.uk/vol1/fastq/SRR298/008/SRR2983658/SRR2983658_2.fastq.gz	source_name: Liver || age: 175 || Sex: male || phenotype: low growth and fatness || tissue: liver	liver	unknown	175	male
418	SRS1198657	Sus scrofa	PRJNA305529	SRR2983653	SRX1472844	RNA-Seq	cDNA	TRANSCRIPTOMIC	PAIRED	15.91	152	ILLUMINA	Illumina HiSeq 2000	https://sra-download.ncbi.nlm.nih.gov/traces/sra37/SRR/002913/SRR2983653	ftp://ftp.sra.ebi.ac.uk/vol1/fastq/SRR298/003/SRR2983653/SRR2983653_1.fastq.gz	ftp://ftp.sra.ebi.ac.uk/vol1/fastq/SRR298/003/SRR2983653/SRR2983653_2.fastq.gz	source_name: Liver || age: 175 || Sex: male || phenotype: low growth and fatness || tissue: liver	liver	unknown	175	male
418	SRS1198657	Sus scrofa	PRJNA305529	SRR2983654	SRX1472844	RNA-Seq	cDNA	TRANSCRIPTOMIC	PAIRED	19.52	152	ILLUMINA	Illumina HiSeq 2000		ftp://ftp.sra.ebi.ac.uk/vol1/fastq/SRR298/004/SRR2983654/SRR2983654_1.fastq.gz	ftp://ftp.sra.ebi.ac.uk/vol1/fastq/SRR298/004/SRR2983654/SRR2983654_2.fastq.gz	source_name: Liver || age: 175 || Sex: male || phenotype: low growth and fatness || tissue: liver	liver	unknown	175	male
418	SRS1198657	Sus scrofa	PRJNA305529	SRR2983655	SRX1472844	RNA-Seq	cDNA	TRANSCRIPTOMIC	PAIRED	19.36	152	ILLUMINA	Illumina HiSeq 2000		ftp://ftp.sra.ebi.ac.uk/vol1/fastq/SRR298/005/SRR2983655/SRR2983655_1.fastq.gz	ftp://ftp.sra.ebi.ac.uk/vol1/fastq/SRR298/005/SRR2983655/SRR2983655_2.fastq.gz	source_name: Liver || age: 175 || Sex: male || phenotype: low growth and fatness || tissue: liver	liver	unknown	175	male
419	SRS1198658	Sus scrofa	PRJNA305529	SRR2983650	SRX1472843	RNA-Seq	cDNA	TRANSCRIPTOMIC	PAIRED	11.15	152	ILLUMINA	Illumina HiSeq 2000		ftp://ftp.sra.ebi.ac.uk/vol1/fastq/SRR298/000/SRR2983650/SRR2983650_1.fastq.gz	ftp://ftp.sra.ebi.ac.uk/vol1/fastq/SRR298/000/SRR2983650/SRR2983650_2.fastq.gz	source_name: Liver || age: 175 || Sex: male || phenotype: low growth and fatness || tissue: liver	liver	unknown	175	male
419	SRS1198658	Sus scrofa	PRJNA305529	SRR2983651	SRX1472843	RNA-Seq	cDNA	TRANSCRIPTOMIC	PAIRED	17.98	152	ILLUMINA	Illumina HiSeq 2000	https://sra-download.ncbi.nlm.nih.gov/traces/sra37/SRR/002913/SRR2983651	ftp://ftp.sra.ebi.ac.uk/vol1/fastq/SRR298/001/SRR2983651/SRR2983651_1.fastq.gz	ftp://ftp.sra.ebi.ac.uk/vol1/fastq/SRR298/001/SRR2983651/SRR2983651_2.fastq.gz	source_name: Liver || age: 175 || Sex: male || phenotype: low growth and fatness || tissue: liver	liver	unknown	175	male
419	SRS1198658	Sus scrofa	PRJNA305529	SRR2983652	SRX1472843	RNA-Seq	cDNA	TRANSCRIPTOMIC	PAIRED	17.74	152	ILLUMINA	Illumina HiSeq 2000	https://sra-download.ncbi.nlm.nih.gov/traces/sra37/SRR/002913/SRR2983652	ftp://ftp.sra.ebi.ac.uk/vol1/fastq/SRR298/002/SRR2983652/SRR2983652_1.fastq.gz	ftp://ftp.sra.ebi.ac.uk/vol1/fastq/SRR298/002/SRR2983652/SRR2983652_2.fastq.gz	source_name: Liver || age: 175 || Sex: male || phenotype: low growth and fatness || tissue: liver	liver	unknown	175	male
420	SRS1198659	Sus scrofa	PRJNA305529	SRR2983647	SRX1472842	RNA-Seq	cDNA	TRANSCRIPTOMIC	PAIRED	10.86	152	ILLUMINA	Illumina HiSeq 2000	https://sra-download.ncbi.nlm.nih.gov/traces/sra37/SRR/002913/SRR2983647	ftp://ftp.sra.ebi.ac.uk/vol1/fastq/SRR298/007/SRR2983647/SRR2983647_1.fastq.gz	ftp://ftp.sra.ebi.ac.uk/vol1/fastq/SRR298/007/SRR2983647/SRR2983647_2.fastq.gz	source_name: Liver || age: 175 || Sex: male || phenotype: low growth and fatness || tissue: liver	liver	unknown	175	male
420	SRS1198659	Sus scrofa	PRJNA305529	SRR2983648	SRX1472842	RNA-Seq	cDNA	TRANSCRIPTOMIC	PAIRED	14.29	152	ILLUMINA	Illumina HiSeq 2000	https://sra-download.ncbi.nlm.nih.gov/traces/sra37/SRR/002913/SRR2983648	ftp://ftp.sra.ebi.ac.uk/vol1/fastq/SRR298/008/SRR2983648/SRR2983648_1.fastq.gz	ftp://ftp.sra.ebi.ac.uk/vol1/fastq/SRR298/008/SRR2983648/SRR2983648_2.fastq.gz	source_name: Liver || age: 175 || Sex: male || phenotype: low growth and fatness || tissue: liver	liver	unknown	175	male
420	SRS1198659	Sus scrofa	PRJNA305529	SRR2983649	SRX1472842	RNA-Seq	cDNA	TRANSCRIPTOMIC	PAIRED	14.19	152	ILLUMINA	Illumina HiSeq 2000		ftp://ftp.sra.ebi.ac.uk/vol1/fastq/SRR298/009/SRR2983649/SRR2983649_1.fastq.gz	ftp://ftp.sra.ebi.ac.uk/vol1/fastq/SRR298/009/SRR2983649/SRR2983649_2.fastq.gz	source_name: Liver || age: 175 || Sex: male || phenotype: low growth and fatness || tissue: liver	liver	unknown	175	male
421	SRS1198660	Sus scrofa	PRJNA305529	SRR2983645	SRX1472841	RNA-Seq	cDNA	TRANSCRIPTOMIC	PAIRED	16.03	152	ILLUMINA	Illumina HiSeq 2000	https://sra-download.ncbi.nlm.nih.gov/traces/sra37/SRR/002913/SRR2983645	ftp://ftp.sra.ebi.ac.uk/vol1/fastq/SRR298/005/SRR2983645/SRR2983645_1.fastq.gz	ftp://ftp.sra.ebi.ac.uk/vol1/fastq/SRR298/005/SRR2983645/SRR2983645_2.fastq.gz	source_name: Liver || age: 175 || Sex: male || phenotype: low growth and fatness || tissue: liver	liver	unknown	175	male
421	SRS1198660	Sus scrofa	PRJNA305529	SRR2983646	SRX1472841	RNA-Seq	cDNA	TRANSCRIPTOMIC	PAIRED	15.9	152	ILLUMINA	Illumina HiSeq 2000	https://sra-download.ncbi.nlm.nih.gov/traces/sra37/SRR/002913/SRR2983646	ftp://ftp.sra.ebi.ac.uk/vol1/fastq/SRR298/006/SRR2983646/SRR2983646_1.fastq.gz	ftp://ftp.sra.ebi.ac.uk/vol1/fastq/SRR298/006/SRR2983646/SRR2983646_2.fastq.gz	source_name: Liver || age: 175 || Sex: male || phenotype: low growth and fatness || tissue: liver	liver	unknown	175	male
422	SRS1198661	Sus scrofa	PRJNA305529	SRR2983641	SRX1472840	RNA-Seq	cDNA	TRANSCRIPTOMIC	PAIRED	14.39	152	ILLUMINA	Illumina HiSeq 2000		ftp://ftp.sra.ebi.ac.uk/vol1/fastq/SRR298/001/SRR2983641/SRR2983641_1.fastq.gz	ftp://ftp.sra.ebi.ac.uk/vol1/fastq/SRR298/001/SRR2983641/SRR2983641_2.fastq.gz	source_name: Liver || age: 175 || Sex: male || phenotype: high growth and fatness || tissue: liver	liver	unknown	175	male
422	SRS1198661	Sus scrofa	PRJNA305529	SRR2983642	SRX1472840	RNA-Seq	cDNA	TRANSCRIPTOMIC	PAIRED	14.37	152	ILLUMINA	Illumina HiSeq 2000		ftp://ftp.sra.ebi.ac.uk/vol1/fastq/SRR298/002/SRR2983642/SRR2983642_1.fastq.gz	ftp://ftp.sra.ebi.ac.uk/vol1/fastq/SRR298/002/SRR2983642/SRR2983642_2.fastq.gz	source_name: Liver || age: 175 || Sex: male || phenotype: high growth and fatness || tissue: liver	liver	unknown	175	male
422	SRS1198661	Sus scrofa	PRJNA305529	SRR2983643	SRX1472840	RNA-Seq	cDNA	TRANSCRIPTOMIC	PAIRED	15.17	152	ILLUMINA	Illumina HiSeq 2000	https://sra-download.ncbi.nlm.nih.gov/traces/sra37/SRR/002913/SRR2983643	ftp://ftp.sra.ebi.ac.uk/vol1/fastq/SRR298/003/SRR2983643/SRR2983643_1.fastq.gz	ftp://ftp.sra.ebi.ac.uk/vol1/fastq/SRR298/003/SRR2983643/SRR2983643_2.fastq.gz	source_name: Liver || age: 175 || Sex: male || phenotype: high growth and fatness || tissue: liver	liver	unknown	175	male
423	SRS1198662	Sus scrofa	PRJNA305529	SRR2983637	SRX1472839	RNA-Seq	cDNA	TRANSCRIPTOMIC	PAIRED	14.89	152	ILLUMINA	Illumina HiSeq 2000	https://sra-download.ncbi.nlm.nih.gov/traces/sra37/SRR/002913/SRR2983637	ftp://ftp.sra.ebi.ac.uk/vol1/fastq/SRR298/007/SRR2983637/SRR2983637_1.fastq.gz	ftp://ftp.sra.ebi.ac.uk/vol1/fastq/SRR298/007/SRR2983637/SRR2983637_2.fastq.gz	source_name: Liver || age: 175 || Sex: male || phenotype: high growth and fatness || tissue: liver	liver	unknown	175	male
423	SRS1198662	Sus scrofa	PRJNA305529	SRR2983638	SRX1472839	RNA-Seq	cDNA	TRANSCRIPTOMIC	PAIRED	22.41	152	ILLUMINA	Illumina HiSeq 2000		ftp://ftp.sra.ebi.ac.uk/vol1/fastq/SRR298/008/SRR2983638/SRR2983638_1.fastq.gz	ftp://ftp.sra.ebi.ac.uk/vol1/fastq/SRR298/008/SRR2983638/SRR2983638_2.fastq.gz	source_name: Liver || age: 175 || Sex: male || phenotype: high growth and fatness || tissue: liver	liver	unknown	175	male
423	SRS1198662	Sus scrofa	PRJNA305529	SRR2983639	SRX1472839	RNA-Seq	cDNA	TRANSCRIPTOMIC	PAIRED	22.25	152	ILLUMINA	Illumina HiSeq 2000		ftp://ftp.sra.ebi.ac.uk/vol1/fastq/SRR298/009/SRR2983639/SRR2983639_1.fastq.gz	ftp://ftp.sra.ebi.ac.uk/vol1/fastq/SRR298/009/SRR2983639/SRR2983639_2.fastq.gz	source_name: Liver || age: 175 || Sex: male || phenotype: high growth and fatness || tissue: liver	liver	unknown	175	male
424	SRS1198663	Sus scrofa	PRJNA305529	SRR2983634	SRX1472838	RNA-Seq	cDNA	TRANSCRIPTOMIC	PAIRED	13.39	152	ILLUMINA	Illumina HiSeq 2000		ftp://ftp.sra.ebi.ac.uk/vol1/fastq/SRR298/004/SRR2983634/SRR2983634_1.fastq.gz	ftp://ftp.sra.ebi.ac.uk/vol1/fastq/SRR298/004/SRR2983634/SRR2983634_2.fastq.gz	source_name: Liver || age: 175 || Sex: male || phenotype: high growth and fatness || tissue: liver	liver	unknown	175	male
424	SRS1198663	Sus scrofa	PRJNA305529	SRR2983635	SRX1472838	RNA-Seq	cDNA	TRANSCRIPTOMIC	PAIRED	18.6	152	ILLUMINA	Illumina HiSeq 2000	https://sra-download.ncbi.nlm.nih.gov/traces/sra37/SRR/002913/SRR2983635	ftp://ftp.sra.ebi.ac.uk/vol1/fastq/SRR298/005/SRR2983635/SRR2983635_1.fastq.gz	ftp://ftp.sra.ebi.ac.uk/vol1/fastq/SRR298/005/SRR2983635/SRR2983635_2.fastq.gz	source_name: Liver || age: 175 || Sex: male || phenotype: high growth and fatness || tissue: liver	liver	unknown	175	male
424	SRS1198663	Sus scrofa	PRJNA305529	SRR2983636	SRX1472838	RNA-Seq	cDNA	TRANSCRIPTOMIC	PAIRED	18.46	152	ILLUMINA	Illumina HiSeq 2000		ftp://ftp.sra.ebi.ac.uk/vol1/fastq/SRR298/006/SRR2983636/SRR2983636_1.fastq.gz	ftp://ftp.sra.ebi.ac.uk/vol1/fastq/SRR298/006/SRR2983636/SRR2983636_2.fastq.gz	source_name: Liver || age: 175 || Sex: male || phenotype: high growth and fatness || tissue: liver	liver	unknown	175	male
425	SRS1198664	Sus scrofa	PRJNA305529	SRR2983632	SRX1472837	RNA-Seq	cDNA	TRANSCRIPTOMIC	PAIRED	14.99	152	ILLUMINA	Illumina HiSeq 2000	https://sra-download.ncbi.nlm.nih.gov/traces/sra37/SRR/002913/SRR2983632	ftp://ftp.sra.ebi.ac.uk/vol1/fastq/SRR298/002/SRR2983632/SRR2983632_1.fastq.gz	ftp://ftp.sra.ebi.ac.uk/vol1/fastq/SRR298/002/SRR2983632/SRR2983632_2.fastq.gz	source_name: Liver || age: 175 || Sex: male || phenotype: high growth and fatness || tissue: liver	liver	unknown	175	male
425	SRS1198664	Sus scrofa	PRJNA305529	SRR2983633	SRX1472837	RNA-Seq	cDNA	TRANSCRIPTOMIC	PAIRED	14.88	152	ILLUMINA	Illumina HiSeq 2000		ftp://ftp.sra.ebi.ac.uk/vol1/fastq/SRR298/003/SRR2983633/SRR2983633_1.fastq.gz	ftp://ftp.sra.ebi.ac.uk/vol1/fastq/SRR298/003/SRR2983633/SRR2983633_2.fastq.gz	source_name: Liver || age: 175 || Sex: male || phenotype: high growth and fatness || tissue: liver	liver	unknown	175	male
426	SRS1198665	Sus scrofa	PRJNA305529	SRR2983628	SRX1472836	RNA-Seq	cDNA	TRANSCRIPTOMIC	PAIRED	13.24	152	ILLUMINA	Illumina HiSeq 2000	https://sra-download.ncbi.nlm.nih.gov/traces/sra37/SRR/002913/SRR2983628	ftp://ftp.sra.ebi.ac.uk/vol1/fastq/SRR298/008/SRR2983628/SRR2983628_1.fastq.gz	ftp://ftp.sra.ebi.ac.uk/vol1/fastq/SRR298/008/SRR2983628/SRR2983628_2.fastq.gz	source_name: Liver || age: 175 || Sex: male || phenotype: high growth and fatness || tissue: liver	liver	unknown	175	male
426	SRS1198665	Sus scrofa	PRJNA305529	SRR2983629	SRX1472836	RNA-Seq	cDNA	TRANSCRIPTOMIC	PAIRED	13.25	152	ILLUMINA	Illumina HiSeq 2000		ftp://ftp.sra.ebi.ac.uk/vol1/fastq/SRR298/009/SRR2983629/SRR2983629_1.fastq.gz	ftp://ftp.sra.ebi.ac.uk/vol1/fastq/SRR298/009/SRR2983629/SRR2983629_2.fastq.gz	source_name: Liver || age: 175 || Sex: male || phenotype: high growth and fatness || tissue: liver	liver	unknown	175	male
426	SRS1198665	Sus scrofa	PRJNA305529	SRR2983630	SRX1472836	RNA-Seq	cDNA	TRANSCRIPTOMIC	PAIRED	13.68	152	ILLUMINA	Illumina HiSeq 2000	https://sra-download.ncbi.nlm.nih.gov/traces/sra37/SRR/002913/SRR2983630	ftp://ftp.sra.ebi.ac.uk/vol1/fastq/SRR298/000/SRR2983630/SRR2983630_1.fastq.gz	ftp://ftp.sra.ebi.ac.uk/vol1/fastq/SRR298/000/SRR2983630/SRR2983630_2.fastq.gz	source_name: Liver || age: 175 || Sex: male || phenotype: high growth and fatness || tissue: liver	liver	unknown	175	male
427	SRS1206413	Sus scrofa	PRJNA305784	SRR2994963	SRX1481176	RNA-Seq	cDNA	TRANSCRIPTOMIC	PAIRED	46.12	200	ILLUMINA	Illumina HiSeq 2000	https://sra-download.ncbi.nlm.nih.gov/traces/sra36/SRR/002924/SRR2994963	ftp://ftp.sra.ebi.ac.uk/vol1/fastq/SRR299/003/SRR2994963/SRR2994963_1.fastq.gz	ftp://ftp.sra.ebi.ac.uk/vol1/fastq/SRR299/003/SRR2994963/SRR2994963_2.fastq.gz	isolate: backfat tissue || dev_stage: missing || sex: female || tissue: fat tissue || BioSampleModel: Model organism or animal	fat	unknown	missing	female
428	SRS1206421	Sus scrofa	PRJNA305784	SRR2995031	SRX1481184	RNA-Seq	cDNA	TRANSCRIPTOMIC	PAIRED	46.46	200	ILLUMINA	Illumina HiSeq 2000	https://sra-download.ncbi.nlm.nih.gov/traces/sra14/SRR/002924/SRR2995031	ftp://ftp.sra.ebi.ac.uk/vol1/fastq/SRR299/001/SRR2995031/SRR2995031_1.fastq.gz	ftp://ftp.sra.ebi.ac.uk/vol1/fastq/SRR299/001/SRR2995031/SRR2995031_2.fastq.gz	isolate: backfat tissue || dev_stage: missing || sex: female || tissue: backfat tissue || BioSampleModel: Model organism or animal	backfat	unknown	missing	female
429	SRS1206426	Sus scrofa	PRJNA305784	SRR2995134	SRX1481215	RNA-Seq	cDNA	TRANSCRIPTOMIC	PAIRED	40.89	200	ILLUMINA	Illumina HiSeq 2000	https://sra-download.ncbi.nlm.nih.gov/traces/sra14/SRR/002924/SRR2995134	ftp://ftp.sra.ebi.ac.uk/vol1/fastq/SRR299/004/SRR2995134/SRR2995134_1.fastq.gz	ftp://ftp.sra.ebi.ac.uk/vol1/fastq/SRR299/004/SRR2995134/SRR2995134_2.fastq.gz	isolate: backfat tissue || dev_stage: missing || sex: male || tissue: backfat tissue || BioSampleModel: Model organism or animal	backfat	unknown	missing	male
430	SRS1206433	Sus scrofa	PRJNA305784	SRR2995139	SRX1481219	RNA-Seq	cDNA	TRANSCRIPTOMIC	PAIRED	44.67	200	ILLUMINA	Illumina HiSeq 2000	https://sra-download.ncbi.nlm.nih.gov/traces/sra21/SRR/002924/SRR2995139	ftp://ftp.sra.ebi.ac.uk/vol1/fastq/SRR299/009/SRR2995139/SRR2995139_1.fastq.gz	ftp://ftp.sra.ebi.ac.uk/vol1/fastq/SRR299/009/SRR2995139/SRR2995139_2.fastq.gz	isolate: backfat tissue || dev_stage: missing || sex: female || tissue: backfat tissue || BioSampleModel: Model organism or animal	backfat	unknown	missing	female
431	SRS1206434	Sus scrofa	PRJNA305784	SRR2995140	SRX1481221	RNA-Seq	cDNA	TRANSCRIPTOMIC	PAIRED	43.45	200	ILLUMINA	Illumina HiSeq 2000	https://sra-download.ncbi.nlm.nih.gov/traces/sra37/SRR/002924/SRR2995140	ftp://ftp.sra.ebi.ac.uk/vol1/fastq/SRR299/000/SRR2995140/SRR2995140_1.fastq.gz	ftp://ftp.sra.ebi.ac.uk/vol1/fastq/SRR299/000/SRR2995140/SRR2995140_2.fastq.gz	isolate: backfat tissue || dev_stage: missing || sex: male || tissue: backfat tissue || BioSampleModel: Model organism or animal	backfat	unknown	missing	male
432	SRS1206436	Sus scrofa	PRJNA305784	SRR2995142	SRX1481223	RNA-Seq	cDNA	TRANSCRIPTOMIC	PAIRED	25.04	200	ILLUMINA	Illumina HiSeq 2000	https://sra-download.ncbi.nlm.nih.gov/traces/sra37/SRR/002924/SRR2995142	ftp://ftp.sra.ebi.ac.uk/vol1/fastq/SRR299/002/SRR2995142/SRR2995142_1.fastq.gz	ftp://ftp.sra.ebi.ac.uk/vol1/fastq/SRR299/002/SRR2995142/SRR2995142_2.fastq.gz	isolate: backfat tissue || dev_stage: missing || sex: male || tissue: backfat tissue || BioSampleModel: Model organism or animal	backfat	unknown	missing	male
433	SRS1206439	Sus scrofa	PRJNA305784	SRR2995144	SRX1481227	RNA-Seq	cDNA	TRANSCRIPTOMIC	PAIRED	36.91	200	ILLUMINA	Illumina HiSeq 2000	https://sra-download.ncbi.nlm.nih.gov/traces/sra21/SRR/002924/SRR2995144	ftp://ftp.sra.ebi.ac.uk/vol1/fastq/SRR299/004/SRR2995144/SRR2995144_1.fastq.gz	ftp://ftp.sra.ebi.ac.uk/vol1/fastq/SRR299/004/SRR2995144/SRR2995144_2.fastq.gz	isolate: backfat tissue || dev_stage: missing || sex: male || tissue: backfat tissue || BioSampleModel: Model organism or animal	backfat	unknown	missing	male
434	SRS1206440	Sus scrofa	PRJNA305784	SRR2995148	SRX1481230	RNA-Seq	cDNA	TRANSCRIPTOMIC	PAIRED	26.05	200	ILLUMINA	Illumina HiSeq 2000	https://sra-download.ncbi.nlm.nih.gov/traces/sra37/SRR/002924/SRR2995148	ftp://ftp.sra.ebi.ac.uk/vol1/fastq/SRR299/008/SRR2995148/SRR2995148_1.fastq.gz	ftp://ftp.sra.ebi.ac.uk/vol1/fastq/SRR299/008/SRR2995148/SRR2995148_2.fastq.gz	isolate: backfat tissue || dev_stage: missing || sex: male || tissue: backfat tissue || BioSampleModel: Model organism or animal	backfat	unknown	missing	male
435	SRS1206441	Sus scrofa	PRJNA305784	SRR2995151	SRX1481233	RNA-Seq	cDNA	TRANSCRIPTOMIC	PAIRED	23.83	200	ILLUMINA	Illumina HiSeq 2000	https://sra-download.ncbi.nlm.nih.gov/traces/sra37/SRR/002924/SRR2995151	ftp://ftp.sra.ebi.ac.uk/vol1/fastq/SRR299/001/SRR2995151/SRR2995151_1.fastq.gz	ftp://ftp.sra.ebi.ac.uk/vol1/fastq/SRR299/001/SRR2995151/SRR2995151_2.fastq.gz	isolate: backfat tissue || dev_stage: missing || sex: male || tissue: backfat tissue || BioSampleModel: Model organism or animal	backfat	unknown	missing	male
436	SRS1206442	Sus scrofa	PRJNA305784	SRR2995155	SRX1481236	RNA-Seq	cDNA	TRANSCRIPTOMIC	PAIRED	29.92	200	ILLUMINA	Illumina HiSeq 2000	https://sra-download.ncbi.nlm.nih.gov/traces/sra37/SRR/002924/SRR2995155	ftp://ftp.sra.ebi.ac.uk/vol1/fastq/SRR299/005/SRR2995155/SRR2995155_1.fastq.gz	ftp://ftp.sra.ebi.ac.uk/vol1/fastq/SRR299/005/SRR2995155/SRR2995155_2.fastq.gz	isolate: backfat tissue || dev_stage: missing || sex: female || tissue: backfat tissue || BioSampleModel: Model organism or animal	backfat	unknown	missing	female
437	SRS1245674	Sus scrofa	PRJNA305976	SRR3098385	SRX1527816	RNA-Seq	cDNA	TRANSCRIPTOMIC	PAIRED	139.14	250	ILLUMINA	Illumina HiSeq 2500		ftp://ftp.sra.ebi.ac.uk/vol1/fastq/SRR309/005/SRR3098385/SRR3098385_1.fastq.gz	ftp://ftp.sra.ebi.ac.uk/vol1/fastq/SRR309/005/SRR3098385/SRR3098385_2.fastq.gz	breed: Diannan small-ear pig || dev_stage: term placenta || sex: pooled male and female || tissue: chorion regions of the pig term placenta || BioSampleModel: Model organism or animal	chorion regions of the pig term placenta	Diannan small-ear pig	term placenta	pooled male and female
438	SRS1283265	Sus scrofa	PRJNA311523	SRR3159997	SRX1569844	RNA-Seq	cDNA	TRANSCRIPTOMIC	PAIRED	29.26	200	ILLUMINA	Illumina HiSeq 2500		ftp://ftp.sra.ebi.ac.uk/vol1/fastq/SRR315/007/SRR3159997/SRR3159997_1.fastq.gz	ftp://ftp.sra.ebi.ac.uk/vol1/fastq/SRR315/007/SRR3159997/SRR3159997_2.fastq.gz	source_name: mixture of multiple tissues || age: 60 days old || tissue: mixture of multiple tissues || breed name: Berkshire	mixture of multiple tissues	Berkshire	60 days old	unknown
439	SRS1283266	Sus scrofa	PRJNA311523	SRR3159996	SRX1569843	RNA-Seq	cDNA	TRANSCRIPTOMIC	PAIRED	22.29	200	ILLUMINA	Illumina HiSeq 2500		ftp://ftp.sra.ebi.ac.uk/vol1/fastq/SRR315/006/SRR3159996/SRR3159996_1.fastq.gz	ftp://ftp.sra.ebi.ac.uk/vol1/fastq/SRR315/006/SRR3159996/SRR3159996_2.fastq.gz	source_name: ovary || age: 60 days old || tissue: ovary || breed name: Berkshire	ovary	Berkshire	60 days old	unknown
440	SRS1283267	Sus scrofa	PRJNA311523	SRR3159995	SRX1569842	RNA-Seq	cDNA	TRANSCRIPTOMIC	PAIRED	28.8	200	ILLUMINA	Illumina HiSeq 2500		ftp://ftp.sra.ebi.ac.uk/vol1/fastq/SRR315/005/SRR3159995/SRR3159995_1.fastq.gz	ftp://ftp.sra.ebi.ac.uk/vol1/fastq/SRR315/005/SRR3159995/SRR3159995_2.fastq.gz	source_name: subcutaneous adipose || age: 60 days old || tissue: subcutaneous adipose || breed name: Berkshire	subcutaneous adipose	Berkshire	60 days old	unknown
441	SRS1283268	Sus scrofa	PRJNA311523	SRR3159994	SRX1569841	RNA-Seq	cDNA	TRANSCRIPTOMIC	PAIRED	30.69	200	ILLUMINA	Illumina HiSeq 2500		ftp://ftp.sra.ebi.ac.uk/vol1/fastq/SRR315/004/SRR3159994/SRR3159994_1.fastq.gz	ftp://ftp.sra.ebi.ac.uk/vol1/fastq/SRR315/004/SRR3159994/SRR3159994_2.fastq.gz	source_name: longissimus dorsi muscle || age: 60 days old || tissue: longissimus dorsi muscle || breed name: Berkshire	longissimus dorsi muscle	Berkshire	60 days old	unknown
442	SRS1283269	Sus scrofa	PRJNA311523	SRR3159993	SRX1569840	RNA-Seq	cDNA	TRANSCRIPTOMIC	PAIRED	25.27	200	ILLUMINA	Illumina HiSeq 2500		ftp://ftp.sra.ebi.ac.uk/vol1/fastq/SRR315/003/SRR3159993/SRR3159993_1.fastq.gz	ftp://ftp.sra.ebi.ac.uk/vol1/fastq/SRR315/003/SRR3159993/SRR3159993_2.fastq.gz	source_name: psoas major muscle || age: 60 days old || tissue: psoas major muscle || breed name: Berkshire	psoas major muscle	Berkshire	60 days old	unknown
443	SRS1283270	Sus scrofa	PRJNA311523	SRR3159992	SRX1569839	RNA-Seq	cDNA	TRANSCRIPTOMIC	PAIRED	23.9	200	ILLUMINA	Illumina HiSeq 2500		ftp://ftp.sra.ebi.ac.uk/vol1/fastq/SRR315/002/SRR3159992/SRR3159992_1.fastq.gz	ftp://ftp.sra.ebi.ac.uk/vol1/fastq/SRR315/002/SRR3159992/SRR3159992_2.fastq.gz	source_name: kidney || age: 60 days old || tissue: kidney || breed name: Berkshire	kidney	Berkshire	60 days old	unknown
444	SRS1283271	Sus scrofa	PRJNA311523	SRR3159991	SRX1569838	RNA-Seq	cDNA	TRANSCRIPTOMIC	PAIRED	24.08	200	ILLUMINA	Illumina HiSeq 2500	https://sra-download.ncbi.nlm.nih.gov/traces/sra37/SRR/003085/SRR3159991	ftp://ftp.sra.ebi.ac.uk/vol1/fastq/SRR315/001/SRR3159991/SRR3159991_1.fastq.gz	ftp://ftp.sra.ebi.ac.uk/vol1/fastq/SRR315/001/SRR3159991/SRR3159991_2.fastq.gz	source_name: lung || age: 60 days old || tissue: lung || breed name: Berkshire	lung	Berkshire	60 days old	unknown
445	SRS1283272	Sus scrofa	PRJNA311523	SRR3159990	SRX1569837	RNA-Seq	cDNA	TRANSCRIPTOMIC	PAIRED	25.62	200	ILLUMINA	Illumina HiSeq 2500		ftp://ftp.sra.ebi.ac.uk/vol1/fastq/SRR315/000/SRR3159990/SRR3159990_1.fastq.gz	ftp://ftp.sra.ebi.ac.uk/vol1/fastq/SRR315/000/SRR3159990/SRR3159990_2.fastq.gz	source_name: spleen || age: 60 days old || tissue: spleen || breed name: Berkshire	spleen	Berkshire	60 days old	unknown
446	SRS1283273	Sus scrofa	PRJNA311523	SRR3159989	SRX1569836	RNA-Seq	cDNA	TRANSCRIPTOMIC	PAIRED	32.39	200	ILLUMINA	Illumina HiSeq 2500		ftp://ftp.sra.ebi.ac.uk/vol1/fastq/SRR315/009/SRR3159989/SRR3159989_1.fastq.gz	ftp://ftp.sra.ebi.ac.uk/vol1/fastq/SRR315/009/SRR3159989/SRR3159989_2.fastq.gz	source_name: liver || age: 60 days old || tissue: liver || breed name: Berkshire	liver	Berkshire	60 days old	unknown
447	SRS1283274	Sus scrofa	PRJNA311523	SRR3159988	SRX1569835	RNA-Seq	cDNA	TRANSCRIPTOMIC	PAIRED	26.73	200	ILLUMINA	Illumina HiSeq 2500		ftp://ftp.sra.ebi.ac.uk/vol1/fastq/SRR315/008/SRR3159988/SRR3159988_1.fastq.gz	ftp://ftp.sra.ebi.ac.uk/vol1/fastq/SRR315/008/SRR3159988/SRR3159988_2.fastq.gz	source_name: heart || age: 60 days old || tissue: heart || breed name: Berkshire	heart	Berkshire	60 days old	unknown
448	SRS1283275	Sus scrofa	PRJNA311523	SRR3160079	SRX1569926	RNA-Seq	cDNA	TRANSCRIPTOMIC	PAIRED	20.76	200	ILLUMINA	Illumina HiSeq 2500	https://sra-download.ncbi.nlm.nih.gov/traces/sra37/SRR/003086/SRR3160079	ftp://ftp.sra.ebi.ac.uk/vol1/fastq/SRR316/009/SRR3160079/SRR3160079_1.fastq.gz	ftp://ftp.sra.ebi.ac.uk/vol1/fastq/SRR316/009/SRR3160079/SRR3160079_2.fastq.gz	source_name: psoas major muscle || age: 60 days old || tissue: psoas major muscle || breed name: Tibetan wild boar	psoas major muscle	Tibetan wild boar	60 days old	unknown
449	SRS1283276	Sus scrofa	PRJNA311523	SRR3160078	SRX1569925	RNA-Seq	cDNA	TRANSCRIPTOMIC	PAIRED	24.1	200	ILLUMINA	Illumina HiSeq 2500	https://sra-download.ncbi.nlm.nih.gov/traces/sra37/SRR/003086/SRR3160078	ftp://ftp.sra.ebi.ac.uk/vol1/fastq/SRR316/008/SRR3160078/SRR3160078_1.fastq.gz	ftp://ftp.sra.ebi.ac.uk/vol1/fastq/SRR316/008/SRR3160078/SRR3160078_2.fastq.gz	source_name: longissimus dorsi muscle || age: 60 days old || tissue: longissimus dorsi muscle || breed name: Tibetan wild boar	longissimus dorsi muscle	Tibetan wild boar	60 days old	unknown
450	SRS1283277	Sus scrofa	PRJNA311523	SRR3160077	SRX1569924	RNA-Seq	cDNA	TRANSCRIPTOMIC	PAIRED	22.34	200	ILLUMINA	Illumina HiSeq 2500		ftp://ftp.sra.ebi.ac.uk/vol1/fastq/SRR316/007/SRR3160077/SRR3160077_1.fastq.gz	ftp://ftp.sra.ebi.ac.uk/vol1/fastq/SRR316/007/SRR3160077/SRR3160077_2.fastq.gz	source_name: spleen || age: 60 days old || tissue: spleen || breed name: Tibetan wild boar	spleen	Tibetan wild boar	60 days old	unknown
451	SRS1283278	Sus scrofa	PRJNA311523	SRR3160076	SRX1569923	RNA-Seq	cDNA	TRANSCRIPTOMIC	PAIRED	31.73	200	ILLUMINA	Illumina HiSeq 2500	https://sra-download.ncbi.nlm.nih.gov/traces/sra37/SRR/003086/SRR3160076	ftp://ftp.sra.ebi.ac.uk/vol1/fastq/SRR316/006/SRR3160076/SRR3160076_1.fastq.gz	ftp://ftp.sra.ebi.ac.uk/vol1/fastq/SRR316/006/SRR3160076/SRR3160076_2.fastq.gz	source_name: mixture of multiple tissues || age: 60 days old || tissue: mixture of multiple tissues || breed name: Rongchang	mixture of multiple tissues	Rongchang	60 days old	unknown
452	SRS1283279	Sus scrofa	PRJNA311523	SRR3160075	SRX1569922	RNA-Seq	cDNA	TRANSCRIPTOMIC	PAIRED	19.46	200	ILLUMINA	Illumina HiSeq 2500		ftp://ftp.sra.ebi.ac.uk/vol1/fastq/SRR316/005/SRR3160075/SRR3160075_1.fastq.gz	ftp://ftp.sra.ebi.ac.uk/vol1/fastq/SRR316/005/SRR3160075/SRR3160075_2.fastq.gz	source_name: ovary || age: 60 days old || tissue: ovary || breed name: Rongchang	ovary	Rongchang	60 days old	unknown
453	SRS1283280	Sus scrofa	PRJNA311523	SRR3160074	SRX1569921	RNA-Seq	cDNA	TRANSCRIPTOMIC	PAIRED	33.88	200	ILLUMINA	Illumina HiSeq 2500	https://sra-download.ncbi.nlm.nih.gov/traces/sra37/SRR/003086/SRR3160074	ftp://ftp.sra.ebi.ac.uk/vol1/fastq/SRR316/004/SRR3160074/SRR3160074_1.fastq.gz	ftp://ftp.sra.ebi.ac.uk/vol1/fastq/SRR316/004/SRR3160074/SRR3160074_2.fastq.gz	source_name: subcutaneous adipose || age: 60 days old || tissue: subcutaneous adipose || breed name: Rongchang	subcutaneous adipose	Rongchang	60 days old	unknown
454	SRS1283281	Sus scrofa	PRJNA311523	SRR3160073	SRX1569920	RNA-Seq	cDNA	TRANSCRIPTOMIC	PAIRED	35.91	200	ILLUMINA	Illumina HiSeq 2500		ftp://ftp.sra.ebi.ac.uk/vol1/fastq/SRR316/003/SRR3160073/SRR3160073_1.fastq.gz	ftp://ftp.sra.ebi.ac.uk/vol1/fastq/SRR316/003/SRR3160073/SRR3160073_2.fastq.gz	source_name: longissimus dorsi muscle || age: 60 days old || tissue: longissimus dorsi muscle || breed name: Rongchang	longissimus dorsi muscle	Rongchang	60 days old	unknown
455	SRS1283282	Sus scrofa	PRJNA311523	SRR3160072	SRX1569919	RNA-Seq	cDNA	TRANSCRIPTOMIC	PAIRED	29.19	200	ILLUMINA	Illumina HiSeq 2500	https://sra-download.ncbi.nlm.nih.gov/traces/sra37/SRR/003086/SRR3160072	ftp://ftp.sra.ebi.ac.uk/vol1/fastq/SRR316/002/SRR3160072/SRR3160072_1.fastq.gz	ftp://ftp.sra.ebi.ac.uk/vol1/fastq/SRR316/002/SRR3160072/SRR3160072_2.fastq.gz	source_name: psoas major muscle || age: 60 days old || tissue: psoas major muscle || breed name: Rongchang	psoas major muscle	Rongchang	60 days old	unknown
456	SRS1283283	Sus scrofa	PRJNA311523	SRR3160071	SRX1569918	RNA-Seq	cDNA	TRANSCRIPTOMIC	PAIRED	23.5	200	ILLUMINA	Illumina HiSeq 2500		ftp://ftp.sra.ebi.ac.uk/vol1/fastq/SRR316/001/SRR3160071/SRR3160071_1.fastq.gz	ftp://ftp.sra.ebi.ac.uk/vol1/fastq/SRR316/001/SRR3160071/SRR3160071_2.fastq.gz	source_name: kidney || age: 60 days old || tissue: kidney || breed name: Rongchang	kidney	Rongchang	60 days old	unknown
457	SRS1283284	Sus scrofa	PRJNA311523	SRR3160070	SRX1569917	RNA-Seq	cDNA	TRANSCRIPTOMIC	PAIRED	22.74	200	ILLUMINA	Illumina HiSeq 2500		ftp://ftp.sra.ebi.ac.uk/vol1/fastq/SRR316/000/SRR3160070/SRR3160070_1.fastq.gz	ftp://ftp.sra.ebi.ac.uk/vol1/fastq/SRR316/000/SRR3160070/SRR3160070_2.fastq.gz	source_name: spleen || age: 60 days old || tissue: spleen || breed name: Rongchang	spleen	Rongchang	60 days old	unknown
458	SRS1283285	Sus scrofa	PRJNA311523	SRR3160069	SRX1569916	RNA-Seq	cDNA	TRANSCRIPTOMIC	PAIRED	33.99	200	ILLUMINA	Illumina HiSeq 2500	https://sra-download.ncbi.nlm.nih.gov/traces/sra37/SRR/003086/SRR3160069	ftp://ftp.sra.ebi.ac.uk/vol1/fastq/SRR316/009/SRR3160069/SRR3160069_1.fastq.gz	ftp://ftp.sra.ebi.ac.uk/vol1/fastq/SRR316/009/SRR3160069/SRR3160069_2.fastq.gz	source_name: liver || age: 60 days old || tissue: liver || breed name: Rongchang	liver	Rongchang	60 days old	unknown
459	SRS1283286	Sus scrofa	PRJNA311523	SRR3160068	SRX1569915	RNA-Seq	cDNA	TRANSCRIPTOMIC	PAIRED	20.89	200	ILLUMINA	Illumina HiSeq 2500	https://sra-download.ncbi.nlm.nih.gov/traces/sra37/SRR/003086/SRR3160068	ftp://ftp.sra.ebi.ac.uk/vol1/fastq/SRR316/008/SRR3160068/SRR3160068_1.fastq.gz	ftp://ftp.sra.ebi.ac.uk/vol1/fastq/SRR316/008/SRR3160068/SRR3160068_2.fastq.gz	source_name: heart || age: 60 days old || tissue: heart || breed name: Rongchang	heart	Rongchang	60 days old	unknown
460	SRS1283287	Sus scrofa	PRJNA311523	SRR3160067	SRX1569914	RNA-Seq	cDNA	TRANSCRIPTOMIC	PAIRED	27.18	200	ILLUMINA	Illumina HiSeq 2500	https://sra-download.ncbi.nlm.nih.gov/traces/sra37/SRR/003086/SRR3160067	ftp://ftp.sra.ebi.ac.uk/vol1/fastq/SRR316/007/SRR3160067/SRR3160067_1.fastq.gz	ftp://ftp.sra.ebi.ac.uk/vol1/fastq/SRR316/007/SRR3160067/SRR3160067_2.fastq.gz	source_name: mixture of multiple tissues || age: 60 days old || tissue: mixture of multiple tissues || breed name: Meishan	mixture of multiple tissues	Meishan	60 days old	unknown
461	SRS1283288	Sus scrofa	PRJNA311523	SRR3160066	SRX1569913	RNA-Seq	cDNA	TRANSCRIPTOMIC	PAIRED	25	200	ILLUMINA	Illumina HiSeq 2500		ftp://ftp.sra.ebi.ac.uk/vol1/fastq/SRR316/006/SRR3160066/SRR3160066_1.fastq.gz	ftp://ftp.sra.ebi.ac.uk/vol1/fastq/SRR316/006/SRR3160066/SRR3160066_2.fastq.gz	source_name: ovary || age: 60 days old || tissue: ovary || breed name: Meishan	ovary	Meishan	60 days old	unknown
462	SRS1283289	Sus scrofa	PRJNA311523	SRR3160065	SRX1569912	RNA-Seq	cDNA	TRANSCRIPTOMIC	PAIRED	28.89	200	ILLUMINA	Illumina HiSeq 2500	https://sra-download.ncbi.nlm.nih.gov/traces/sra37/SRR/003086/SRR3160065	ftp://ftp.sra.ebi.ac.uk/vol1/fastq/SRR316/005/SRR3160065/SRR3160065_1.fastq.gz	ftp://ftp.sra.ebi.ac.uk/vol1/fastq/SRR316/005/SRR3160065/SRR3160065_2.fastq.gz	source_name: subcutaneous adipose || age: 60 days old || tissue: subcutaneous adipose || breed name: Meishan	subcutaneous adipose	Meishan	60 days old	unknown
463	SRS1283290	Sus scrofa	PRJNA311523	SRR3160064	SRX1569911	RNA-Seq	cDNA	TRANSCRIPTOMIC	PAIRED	26.32	200	ILLUMINA	Illumina HiSeq 2500		ftp://ftp.sra.ebi.ac.uk/vol1/fastq/SRR316/004/SRR3160064/SRR3160064_1.fastq.gz	ftp://ftp.sra.ebi.ac.uk/vol1/fastq/SRR316/004/SRR3160064/SRR3160064_2.fastq.gz	source_name: longissimus dorsi muscle || age: 60 days old || tissue: longissimus dorsi muscle || breed name: Meishan	longissimus dorsi muscle	Meishan	60 days old	unknown
464	SRS1283291	Sus scrofa	PRJNA311523	SRR3160063	SRX1569910	RNA-Seq	cDNA	TRANSCRIPTOMIC	PAIRED	26.12	200	ILLUMINA	Illumina HiSeq 2500		ftp://ftp.sra.ebi.ac.uk/vol1/fastq/SRR316/003/SRR3160063/SRR3160063_1.fastq.gz	ftp://ftp.sra.ebi.ac.uk/vol1/fastq/SRR316/003/SRR3160063/SRR3160063_2.fastq.gz	source_name: psoas major muscle || age: 60 days old || tissue: psoas major muscle || breed name: Meishan	psoas major muscle	Meishan	60 days old	unknown
465	SRS1283292	Sus scrofa	PRJNA311523	SRR3160062	SRX1569909	RNA-Seq	cDNA	TRANSCRIPTOMIC	PAIRED	30.42	200	ILLUMINA	Illumina HiSeq 2500		ftp://ftp.sra.ebi.ac.uk/vol1/fastq/SRR316/002/SRR3160062/SRR3160062_1.fastq.gz	ftp://ftp.sra.ebi.ac.uk/vol1/fastq/SRR316/002/SRR3160062/SRR3160062_2.fastq.gz	source_name: kidney || age: 60 days old || tissue: kidney || breed name: Meishan	kidney	Meishan	60 days old	unknown
466	SRS1283293	Sus scrofa	PRJNA311523	SRR3160061	SRX1569908	RNA-Seq	cDNA	TRANSCRIPTOMIC	PAIRED	26.65	200	ILLUMINA	Illumina HiSeq 2500	https://sra-download.ncbi.nlm.nih.gov/traces/sra37/SRR/003085/SRR3160061	ftp://ftp.sra.ebi.ac.uk/vol1/fastq/SRR316/001/SRR3160061/SRR3160061_1.fastq.gz	ftp://ftp.sra.ebi.ac.uk/vol1/fastq/SRR316/001/SRR3160061/SRR3160061_2.fastq.gz	source_name: lung || age: 60 days old || tissue: lung || breed name: Meishan	lung	Meishan	60 days old	unknown
467	SRS1283294	Sus scrofa	PRJNA311523	SRR3160060	SRX1569907	RNA-Seq	cDNA	TRANSCRIPTOMIC	PAIRED	27.55	200	ILLUMINA	Illumina HiSeq 2500	https://sra-download.ncbi.nlm.nih.gov/traces/sra37/SRR/003085/SRR3160060	ftp://ftp.sra.ebi.ac.uk/vol1/fastq/SRR316/000/SRR3160060/SRR3160060_1.fastq.gz	ftp://ftp.sra.ebi.ac.uk/vol1/fastq/SRR316/000/SRR3160060/SRR3160060_2.fastq.gz	source_name: spleen || age: 60 days old || tissue: spleen || breed name: Meishan	spleen	Meishan	60 days old	unknown
468	SRS1283295	Sus scrofa	PRJNA311523	SRR3160059	SRX1569906	RNA-Seq	cDNA	TRANSCRIPTOMIC	PAIRED	30.27	200	ILLUMINA	Illumina HiSeq 2500	https://sra-download.ncbi.nlm.nih.gov/traces/sra37/SRR/003085/SRR3160059	ftp://ftp.sra.ebi.ac.uk/vol1/fastq/SRR316/009/SRR3160059/SRR3160059_1.fastq.gz	ftp://ftp.sra.ebi.ac.uk/vol1/fastq/SRR316/009/SRR3160059/SRR3160059_2.fastq.gz	source_name: liver || age: 60 days old || tissue: liver || breed name: Meishan	liver	Meishan	60 days old	unknown
469	SRS1283296	Sus scrofa	PRJNA311523	SRR3160058	SRX1569905	RNA-Seq	cDNA	TRANSCRIPTOMIC	PAIRED	27.48	200	ILLUMINA	Illumina HiSeq 2500	https://sra-download.ncbi.nlm.nih.gov/traces/sra37/SRR/003085/SRR3160058	ftp://ftp.sra.ebi.ac.uk/vol1/fastq/SRR316/008/SRR3160058/SRR3160058_1.fastq.gz	ftp://ftp.sra.ebi.ac.uk/vol1/fastq/SRR316/008/SRR3160058/SRR3160058_2.fastq.gz	source_name: heart || age: 60 days old || tissue: heart || breed name: Meishan	heart	Meishan	60 days old	unknown
470	SRS1283297	Sus scrofa	PRJNA311523	SRR3160057	SRX1569904	RNA-Seq	cDNA	TRANSCRIPTOMIC	PAIRED	30.68	200	ILLUMINA	Illumina HiSeq 2500		ftp://ftp.sra.ebi.ac.uk/vol1/fastq/SRR316/007/SRR3160057/SRR3160057_1.fastq.gz	ftp://ftp.sra.ebi.ac.uk/vol1/fastq/SRR316/007/SRR3160057/SRR3160057_2.fastq.gz	source_name: mixture of multiple tissues || age: 60 days old || tissue: mixture of multiple tissues || breed name: Jinhua	mixture of multiple tissues	Jinhua	60 days old	unknown
471	SRS1283298	Sus scrofa	PRJNA311523	SRR3160056	SRX1569903	RNA-Seq	cDNA	TRANSCRIPTOMIC	PAIRED	24.22	200	ILLUMINA	Illumina HiSeq 2500		ftp://ftp.sra.ebi.ac.uk/vol1/fastq/SRR316/006/SRR3160056/SRR3160056_1.fastq.gz	ftp://ftp.sra.ebi.ac.uk/vol1/fastq/SRR316/006/SRR3160056/SRR3160056_2.fastq.gz	source_name: ovary || age: 60 days old || tissue: ovary || breed name: Jinhua	ovary	Jinhua	60 days old	unknown
472	SRS1283299	Sus scrofa	PRJNA311523	SRR3160055	SRX1569902	RNA-Seq	cDNA	TRANSCRIPTOMIC	PAIRED	32.42	200	ILLUMINA	Illumina HiSeq 2500		ftp://ftp.sra.ebi.ac.uk/vol1/fastq/SRR316/005/SRR3160055/SRR3160055_1.fastq.gz	ftp://ftp.sra.ebi.ac.uk/vol1/fastq/SRR316/005/SRR3160055/SRR3160055_2.fastq.gz	source_name: subcutaneous adipose || age: 60 days old || tissue: subcutaneous adipose || breed name: Jinhua	subcutaneous adipose	Jinhua	60 days old	unknown
473	SRS1283300	Sus scrofa	PRJNA311523	SRR3160054	SRX1569901	RNA-Seq	cDNA	TRANSCRIPTOMIC	PAIRED	37.14	200	ILLUMINA	Illumina HiSeq 2500	https://sra-download.ncbi.nlm.nih.gov/traces/sra37/SRR/003085/SRR3160054	ftp://ftp.sra.ebi.ac.uk/vol1/fastq/SRR316/004/SRR3160054/SRR3160054_1.fastq.gz	ftp://ftp.sra.ebi.ac.uk/vol1/fastq/SRR316/004/SRR3160054/SRR3160054_2.fastq.gz	source_name: longissimus dorsi muscle || age: 60 days old || tissue: longissimus dorsi muscle || breed name: Jinhua	longissimus dorsi muscle	Jinhua	60 days old	unknown
474	SRS1283301	Sus scrofa	PRJNA311523	SRR3160053	SRX1569900	RNA-Seq	cDNA	TRANSCRIPTOMIC	PAIRED	23.93	200	ILLUMINA	Illumina HiSeq 2500		ftp://ftp.sra.ebi.ac.uk/vol1/fastq/SRR316/003/SRR3160053/SRR3160053_1.fastq.gz	ftp://ftp.sra.ebi.ac.uk/vol1/fastq/SRR316/003/SRR3160053/SRR3160053_2.fastq.gz	source_name: psoas major muscle || age: 60 days old || tissue: psoas major muscle || breed name: Jinhua	psoas major muscle	Jinhua	60 days old	unknown
475	SRS1283302	Sus scrofa	PRJNA311523	SRR3160052	SRX1569899	RNA-Seq	cDNA	TRANSCRIPTOMIC	PAIRED	23.41	200	ILLUMINA	Illumina HiSeq 2500	https://sra-download.ncbi.nlm.nih.gov/traces/sra37/SRR/003085/SRR3160052	ftp://ftp.sra.ebi.ac.uk/vol1/fastq/SRR316/002/SRR3160052/SRR3160052_1.fastq.gz	ftp://ftp.sra.ebi.ac.uk/vol1/fastq/SRR316/002/SRR3160052/SRR3160052_2.fastq.gz	source_name: kidney || age: 60 days old || tissue: kidney || breed name: Jinhua	kidney	Jinhua	60 days old	unknown
476	SRS1283303	Sus scrofa	PRJNA311523	SRR3160051	SRX1569898	RNA-Seq	cDNA	TRANSCRIPTOMIC	PAIRED	23.95	200	ILLUMINA	Illumina HiSeq 2500	https://sra-download.ncbi.nlm.nih.gov/traces/sra37/SRR/003085/SRR3160051	ftp://ftp.sra.ebi.ac.uk/vol1/fastq/SRR316/001/SRR3160051/SRR3160051_1.fastq.gz	ftp://ftp.sra.ebi.ac.uk/vol1/fastq/SRR316/001/SRR3160051/SRR3160051_2.fastq.gz	source_name: lung || age: 60 days old || tissue: lung || breed name: Jinhua	lung	Jinhua	60 days old	unknown
477	SRS1283304	Sus scrofa	PRJNA311523	SRR3160050	SRX1569897	RNA-Seq	cDNA	TRANSCRIPTOMIC	PAIRED	22.47	200	ILLUMINA	Illumina HiSeq 2500		ftp://ftp.sra.ebi.ac.uk/vol1/fastq/SRR316/000/SRR3160050/SRR3160050_1.fastq.gz	ftp://ftp.sra.ebi.ac.uk/vol1/fastq/SRR316/000/SRR3160050/SRR3160050_2.fastq.gz	source_name: spleen || age: 60 days old || tissue: spleen || breed name: Jinhua	spleen	Jinhua	60 days old	unknown
478	SRS1283305	Sus scrofa	PRJNA311523	SRR3160049	SRX1569896	RNA-Seq	cDNA	TRANSCRIPTOMIC	PAIRED	25.79	200	ILLUMINA	Illumina HiSeq 2500		ftp://ftp.sra.ebi.ac.uk/vol1/fastq/SRR316/009/SRR3160049/SRR3160049_1.fastq.gz	ftp://ftp.sra.ebi.ac.uk/vol1/fastq/SRR316/009/SRR3160049/SRR3160049_2.fastq.gz	source_name: liver || age: 60 days old || tissue: liver || breed name: Jinhua	liver	Jinhua	60 days old	unknown
479	SRS1283306	Sus scrofa	PRJNA311523	SRR3160048	SRX1569895	RNA-Seq	cDNA	TRANSCRIPTOMIC	PAIRED	23.34	200	ILLUMINA	Illumina HiSeq 2500	https://sra-download.ncbi.nlm.nih.gov/traces/sra37/SRR/003085/SRR3160048	ftp://ftp.sra.ebi.ac.uk/vol1/fastq/SRR316/008/SRR3160048/SRR3160048_1.fastq.gz	ftp://ftp.sra.ebi.ac.uk/vol1/fastq/SRR316/008/SRR3160048/SRR3160048_2.fastq.gz	source_name: heart || age: 60 days old || tissue: heart || breed name: Jinhua	heart	Jinhua	60 days old	unknown
480	SRS1283307	Sus scrofa	PRJNA311523	SRR3160047	SRX1569894	RNA-Seq	cDNA	TRANSCRIPTOMIC	PAIRED	34.94	200	ILLUMINA	Illumina HiSeq 2500		ftp://ftp.sra.ebi.ac.uk/vol1/fastq/SRR316/007/SRR3160047/SRR3160047_1.fastq.gz	ftp://ftp.sra.ebi.ac.uk/vol1/fastq/SRR316/007/SRR3160047/SRR3160047_2.fastq.gz	source_name: mixture of multiple tissues || age: 60 days old || tissue: mixture of multiple tissues || breed name: Bamei	mixture of multiple tissues	Bamei	60 days old	unknown
481	SRS1283308	Sus scrofa	PRJNA311523	SRR3160046	SRX1569893	RNA-Seq	cDNA	TRANSCRIPTOMIC	PAIRED	21.16	200	ILLUMINA	Illumina HiSeq 2500	https://sra-download.ncbi.nlm.nih.gov/traces/sra37/SRR/003085/SRR3160046	ftp://ftp.sra.ebi.ac.uk/vol1/fastq/SRR316/006/SRR3160046/SRR3160046_1.fastq.gz	ftp://ftp.sra.ebi.ac.uk/vol1/fastq/SRR316/006/SRR3160046/SRR3160046_2.fastq.gz	source_name: ovary || age: 60 days old || tissue: ovary || breed name: Bamei	ovary	Bamei	60 days old	unknown
482	SRS1283309	Sus scrofa	PRJNA311523	SRR3160045	SRX1569892	RNA-Seq	cDNA	TRANSCRIPTOMIC	PAIRED	26.97	200	ILLUMINA	Illumina HiSeq 2500		ftp://ftp.sra.ebi.ac.uk/vol1/fastq/SRR316/005/SRR3160045/SRR3160045_1.fastq.gz	ftp://ftp.sra.ebi.ac.uk/vol1/fastq/SRR316/005/SRR3160045/SRR3160045_2.fastq.gz	source_name: subcutaneous adipose || age: 60 days old || tissue: subcutaneous adipose || breed name: Bamei	subcutaneous adipose	Bamei	60 days old	unknown
483	SRS1283310	Sus scrofa	PRJNA311523	SRR3160044	SRX1569891	RNA-Seq	cDNA	TRANSCRIPTOMIC	PAIRED	28.69	200	ILLUMINA	Illumina HiSeq 2500		ftp://ftp.sra.ebi.ac.uk/vol1/fastq/SRR316/004/SRR3160044/SRR3160044_1.fastq.gz	ftp://ftp.sra.ebi.ac.uk/vol1/fastq/SRR316/004/SRR3160044/SRR3160044_2.fastq.gz	source_name: longissimus dorsi muscle || age: 60 days old || tissue: longissimus dorsi muscle || breed name: Bamei	longissimus dorsi muscle	Bamei	60 days old	unknown
484	SRS1283311	Sus scrofa	PRJNA311523	SRR3160043	SRX1569890	RNA-Seq	cDNA	TRANSCRIPTOMIC	PAIRED	22.93	200	ILLUMINA	Illumina HiSeq 2500		ftp://ftp.sra.ebi.ac.uk/vol1/fastq/SRR316/003/SRR3160043/SRR3160043_1.fastq.gz	ftp://ftp.sra.ebi.ac.uk/vol1/fastq/SRR316/003/SRR3160043/SRR3160043_2.fastq.gz	source_name: psoas major muscle || age: 60 days old || tissue: psoas major muscle || breed name: Bamei	psoas major muscle	Bamei	60 days old	unknown
485	SRS1283312	Sus scrofa	PRJNA311523	SRR3160042	SRX1569889	RNA-Seq	cDNA	TRANSCRIPTOMIC	PAIRED	21.02	200	ILLUMINA	Illumina HiSeq 2500		ftp://ftp.sra.ebi.ac.uk/vol1/fastq/SRR316/002/SRR3160042/SRR3160042_1.fastq.gz	ftp://ftp.sra.ebi.ac.uk/vol1/fastq/SRR316/002/SRR3160042/SRR3160042_2.fastq.gz	source_name: kidney || age: 60 days old || tissue: kidney || breed name: Bamei	kidney	Bamei	60 days old	unknown
486	SRS1283313	Sus scrofa	PRJNA311523	SRR3160041	SRX1569888	RNA-Seq	cDNA	TRANSCRIPTOMIC	PAIRED	28.63	200	ILLUMINA	Illumina HiSeq 2500	https://sra-download.ncbi.nlm.nih.gov/traces/sra37/SRR/003085/SRR3160041	ftp://ftp.sra.ebi.ac.uk/vol1/fastq/SRR316/001/SRR3160041/SRR3160041_1.fastq.gz	ftp://ftp.sra.ebi.ac.uk/vol1/fastq/SRR316/001/SRR3160041/SRR3160041_2.fastq.gz	source_name: lung || age: 60 days old || tissue: lung || breed name: Bamei	lung	Bamei	60 days old	unknown
487	SRS1283314	Sus scrofa	PRJNA311523	SRR3160040	SRX1569887	RNA-Seq	cDNA	TRANSCRIPTOMIC	PAIRED	20.8	200	ILLUMINA	Illumina HiSeq 2500	https://sra-download.ncbi.nlm.nih.gov/traces/sra37/SRR/003085/SRR3160040	ftp://ftp.sra.ebi.ac.uk/vol1/fastq/SRR316/000/SRR3160040/SRR3160040_1.fastq.gz	ftp://ftp.sra.ebi.ac.uk/vol1/fastq/SRR316/000/SRR3160040/SRR3160040_2.fastq.gz	source_name: spleen || age: 60 days old || tissue: spleen || breed name: Bamei	spleen	Bamei	60 days old	unknown
488	SRS1283315	Sus scrofa	PRJNA311523	SRR3160039	SRX1569886	RNA-Seq	cDNA	TRANSCRIPTOMIC	PAIRED	31.92	200	ILLUMINA	Illumina HiSeq 2500	https://sra-download.ncbi.nlm.nih.gov/traces/sra37/SRR/003085/SRR3160039	ftp://ftp.sra.ebi.ac.uk/vol1/fastq/SRR316/009/SRR3160039/SRR3160039_1.fastq.gz	ftp://ftp.sra.ebi.ac.uk/vol1/fastq/SRR316/009/SRR3160039/SRR3160039_2.fastq.gz	source_name: liver || age: 60 days old || tissue: liver || breed name: Bamei	liver	Bamei	60 days old	unknown
489	SRS1283316	Sus scrofa	PRJNA311523	SRR3160038	SRX1569885	RNA-Seq	cDNA	TRANSCRIPTOMIC	PAIRED	27.04	200	ILLUMINA	Illumina HiSeq 2500	https://sra-download.ncbi.nlm.nih.gov/traces/sra37/SRR/003085/SRR3160038	ftp://ftp.sra.ebi.ac.uk/vol1/fastq/SRR316/008/SRR3160038/SRR3160038_1.fastq.gz	ftp://ftp.sra.ebi.ac.uk/vol1/fastq/SRR316/008/SRR3160038/SRR3160038_2.fastq.gz	source_name: heart || age: 60 days old || tissue: heart || breed name: Bamei	heart	Bamei	60 days old	unknown
490	SRS1283317	Sus scrofa	PRJNA311523	SRR3160037	SRX1569884	RNA-Seq	cDNA	TRANSCRIPTOMIC	PAIRED	27.74	200	ILLUMINA	Illumina HiSeq 2500		ftp://ftp.sra.ebi.ac.uk/vol1/fastq/SRR316/007/SRR3160037/SRR3160037_1.fastq.gz	ftp://ftp.sra.ebi.ac.uk/vol1/fastq/SRR316/007/SRR3160037/SRR3160037_2.fastq.gz	source_name: mixture of multiple tissues || age: 60 days old || tissue: mixture of multiple tissues || breed name: PiÃ©train	mixture of multiple tissues	PiÃ©train	60 days old	unknown
491	SRS1283318	Sus scrofa	PRJNA311523	SRR3160036	SRX1569883	RNA-Seq	cDNA	TRANSCRIPTOMIC	PAIRED	22.79	200	ILLUMINA	Illumina HiSeq 2500		ftp://ftp.sra.ebi.ac.uk/vol1/fastq/SRR316/006/SRR3160036/SRR3160036_1.fastq.gz	ftp://ftp.sra.ebi.ac.uk/vol1/fastq/SRR316/006/SRR3160036/SRR3160036_2.fastq.gz	source_name: ovary || age: 60 days old || tissue: ovary || breed name: PiÃ©train	ovary	PiÃ©train	60 days old	unknown
492	SRS1283319	Sus scrofa	PRJNA311523	SRR3160035	SRX1569882	RNA-Seq	cDNA	TRANSCRIPTOMIC	PAIRED	29.46	200	ILLUMINA	Illumina HiSeq 2500	https://sra-download.ncbi.nlm.nih.gov/traces/sra37/SRR/003085/SRR3160035	ftp://ftp.sra.ebi.ac.uk/vol1/fastq/SRR316/005/SRR3160035/SRR3160035_1.fastq.gz	ftp://ftp.sra.ebi.ac.uk/vol1/fastq/SRR316/005/SRR3160035/SRR3160035_2.fastq.gz	source_name: subcutaneous adipose || age: 60 days old || tissue: subcutaneous adipose || breed name: PiÃ©train	subcutaneous adipose	PiÃ©train	60 days old	unknown
493	SRS1283320	Sus scrofa	PRJNA311523	SRR3160034	SRX1569881	RNA-Seq	cDNA	TRANSCRIPTOMIC	PAIRED	26.23	200	ILLUMINA	Illumina HiSeq 2500	https://sra-download.ncbi.nlm.nih.gov/traces/sra37/SRR/003085/SRR3160034	ftp://ftp.sra.ebi.ac.uk/vol1/fastq/SRR316/004/SRR3160034/SRR3160034_1.fastq.gz	ftp://ftp.sra.ebi.ac.uk/vol1/fastq/SRR316/004/SRR3160034/SRR3160034_2.fastq.gz	source_name: longissimus dorsi muscle || age: 60 days old || tissue: longissimus dorsi muscle || breed name: PiÃ©train	longissimus dorsi muscle	PiÃ©train	60 days old	unknown
494	SRS1283321	Sus scrofa	PRJNA311523	SRR3160033	SRX1569880	RNA-Seq	cDNA	TRANSCRIPTOMIC	PAIRED	27.59	200	ILLUMINA	Illumina HiSeq 2500		ftp://ftp.sra.ebi.ac.uk/vol1/fastq/SRR316/003/SRR3160033/SRR3160033_1.fastq.gz	ftp://ftp.sra.ebi.ac.uk/vol1/fastq/SRR316/003/SRR3160033/SRR3160033_2.fastq.gz	source_name: psoas major muscle || age: 60 days old || tissue: psoas major muscle || breed name: PiÃ©train	psoas major muscle	PiÃ©train	60 days old	unknown
495	SRS1283322	Sus scrofa	PRJNA311523	SRR3160032	SRX1569879	RNA-Seq	cDNA	TRANSCRIPTOMIC	PAIRED	20.63	200	ILLUMINA	Illumina HiSeq 2500		ftp://ftp.sra.ebi.ac.uk/vol1/fastq/SRR316/002/SRR3160032/SRR3160032_1.fastq.gz	ftp://ftp.sra.ebi.ac.uk/vol1/fastq/SRR316/002/SRR3160032/SRR3160032_2.fastq.gz	source_name: kidney || age: 60 days old || tissue: kidney || breed name: PiÃ©train	kidney	PiÃ©train	60 days old	unknown
496	SRS1283323	Sus scrofa	PRJNA311523	SRR3160031	SRX1569878	RNA-Seq	cDNA	TRANSCRIPTOMIC	PAIRED	20.46	200	ILLUMINA	Illumina HiSeq 2500		ftp://ftp.sra.ebi.ac.uk/vol1/fastq/SRR316/001/SRR3160031/SRR3160031_1.fastq.gz	ftp://ftp.sra.ebi.ac.uk/vol1/fastq/SRR316/001/SRR3160031/SRR3160031_2.fastq.gz	source_name: lung || age: 60 days old || tissue: lung || breed name: PiÃ©train	lung	PiÃ©train	60 days old	unknown
497	SRS1283324	Sus scrofa	PRJNA311523	SRR3160030	SRX1569877	RNA-Seq	cDNA	TRANSCRIPTOMIC	PAIRED	23.54	200	ILLUMINA	Illumina HiSeq 2500	https://sra-download.ncbi.nlm.nih.gov/traces/sra37/SRR/003085/SRR3160030	ftp://ftp.sra.ebi.ac.uk/vol1/fastq/SRR316/000/SRR3160030/SRR3160030_1.fastq.gz	ftp://ftp.sra.ebi.ac.uk/vol1/fastq/SRR316/000/SRR3160030/SRR3160030_2.fastq.gz	source_name: spleen || age: 60 days old || tissue: spleen || breed name: PiÃ©train	spleen	PiÃ©train	60 days old	unknown
498	SRS1283325	Sus scrofa	PRJNA311523	SRR3160029	SRX1569876	RNA-Seq	cDNA	TRANSCRIPTOMIC	PAIRED	29.9	200	ILLUMINA	Illumina HiSeq 2500		ftp://ftp.sra.ebi.ac.uk/vol1/fastq/SRR316/009/SRR3160029/SRR3160029_1.fastq.gz	ftp://ftp.sra.ebi.ac.uk/vol1/fastq/SRR316/009/SRR3160029/SRR3160029_2.fastq.gz	source_name: liver || age: 60 days old || tissue: liver || breed name: PiÃ©train	liver	PiÃ©train	60 days old	unknown
499	SRS1283326	Sus scrofa	PRJNA311523	SRR3160028	SRX1569875	RNA-Seq	cDNA	TRANSCRIPTOMIC	PAIRED	18.17	200	ILLUMINA	Illumina HiSeq 2500		ftp://ftp.sra.ebi.ac.uk/vol1/fastq/SRR316/008/SRR3160028/SRR3160028_1.fastq.gz	ftp://ftp.sra.ebi.ac.uk/vol1/fastq/SRR316/008/SRR3160028/SRR3160028_2.fastq.gz	source_name: heart || age: 60 days old || tissue: heart || breed name: PiÃ©train	heart	PiÃ©train	60 days old	unknown
500	SRS1283327	Sus scrofa	PRJNA311523	SRR3160027	SRX1569874	RNA-Seq	cDNA	TRANSCRIPTOMIC	PAIRED	36.2	200	ILLUMINA	Illumina HiSeq 2500		ftp://ftp.sra.ebi.ac.uk/vol1/fastq/SRR316/007/SRR3160027/SRR3160027_1.fastq.gz	ftp://ftp.sra.ebi.ac.uk/vol1/fastq/SRR316/007/SRR3160027/SRR3160027_2.fastq.gz	source_name: mixture of multiple tissues || age: 60 days old || tissue: mixture of multiple tissues || breed name: Large White	mixture of multiple tissues	Large White	60 days old	unknown
501	SRS1283328	Sus scrofa	PRJNA311523	SRR3160025	SRX1569872	RNA-Seq	cDNA	TRANSCRIPTOMIC	PAIRED	28.66	200	ILLUMINA	Illumina HiSeq 2500	https://sra-download.ncbi.nlm.nih.gov/traces/sra37/SRR/003085/SRR3160025	ftp://ftp.sra.ebi.ac.uk/vol1/fastq/SRR316/005/SRR3160025/SRR3160025_1.fastq.gz	ftp://ftp.sra.ebi.ac.uk/vol1/fastq/SRR316/005/SRR3160025/SRR3160025_2.fastq.gz	source_name: subcutaneous adipose || age: 60 days old || tissue: subcutaneous adipose || breed name: Large White	subcutaneous adipose	Large White	60 days old	unknown
502	SRS1283329	Sus scrofa	PRJNA311523	SRR3160024	SRX1569871	RNA-Seq	cDNA	TRANSCRIPTOMIC	PAIRED	27.16	200	ILLUMINA	Illumina HiSeq 2500	https://sra-download.ncbi.nlm.nih.gov/traces/sra37/SRR/003085/SRR3160024	ftp://ftp.sra.ebi.ac.uk/vol1/fastq/SRR316/004/SRR3160024/SRR3160024_1.fastq.gz	ftp://ftp.sra.ebi.ac.uk/vol1/fastq/SRR316/004/SRR3160024/SRR3160024_2.fastq.gz	source_name: longissimus dorsi muscle || age: 60 days old || tissue: longissimus dorsi muscle || breed name: Large White	longissimus dorsi muscle	Large White	60 days old	unknown
503	SRS1283330	Sus scrofa	PRJNA311523	SRR3160023	SRX1569870	RNA-Seq	cDNA	TRANSCRIPTOMIC	PAIRED	23.83	200	ILLUMINA	Illumina HiSeq 2500	https://sra-download.ncbi.nlm.nih.gov/traces/sra37/SRR/003085/SRR3160023	ftp://ftp.sra.ebi.ac.uk/vol1/fastq/SRR316/003/SRR3160023/SRR3160023_1.fastq.gz	ftp://ftp.sra.ebi.ac.uk/vol1/fastq/SRR316/003/SRR3160023/SRR3160023_2.fastq.gz	source_name: psoas major muscle || age: 60 days old || tissue: psoas major muscle || breed name: Large White	psoas major muscle	Large White	60 days old	unknown
504	SRS1283331	Sus scrofa	PRJNA311523	SRR3160022	SRX1569869	RNA-Seq	cDNA	TRANSCRIPTOMIC	PAIRED	24.18	200	ILLUMINA	Illumina HiSeq 2500		ftp://ftp.sra.ebi.ac.uk/vol1/fastq/SRR316/002/SRR3160022/SRR3160022_1.fastq.gz	ftp://ftp.sra.ebi.ac.uk/vol1/fastq/SRR316/002/SRR3160022/SRR3160022_2.fastq.gz	source_name: kidney || age: 60 days old || tissue: kidney || breed name: Large White	kidney	Large White	60 days old	unknown
505	SRS1283332	Sus scrofa	PRJNA311523	SRR3160021	SRX1569868	RNA-Seq	cDNA	TRANSCRIPTOMIC	PAIRED	23.88	200	ILLUMINA	Illumina HiSeq 2500	https://sra-download.ncbi.nlm.nih.gov/traces/sra37/SRR/003085/SRR3160021	ftp://ftp.sra.ebi.ac.uk/vol1/fastq/SRR316/001/SRR3160021/SRR3160021_1.fastq.gz	ftp://ftp.sra.ebi.ac.uk/vol1/fastq/SRR316/001/SRR3160021/SRR3160021_2.fastq.gz	source_name: lung || age: 60 days old || tissue: lung || breed name: Large White	lung	Large White	60 days old	unknown
506	SRS1283333	Sus scrofa	PRJNA311523	SRR3160020	SRX1569867	RNA-Seq	cDNA	TRANSCRIPTOMIC	PAIRED	25.45	200	ILLUMINA	Illumina HiSeq 2500	https://sra-download.ncbi.nlm.nih.gov/traces/sra37/SRR/003085/SRR3160020	ftp://ftp.sra.ebi.ac.uk/vol1/fastq/SRR316/000/SRR3160020/SRR3160020_1.fastq.gz	ftp://ftp.sra.ebi.ac.uk/vol1/fastq/SRR316/000/SRR3160020/SRR3160020_2.fastq.gz	source_name: spleen || age: 60 days old || tissue: spleen || breed name: Large White	spleen	Large White	60 days old	unknown
507	SRS1283334	Sus scrofa	PRJNA311523	SRR3160018	SRX1569865	RNA-Seq	cDNA	TRANSCRIPTOMIC	PAIRED	21.64	200	ILLUMINA	Illumina HiSeq 2500	https://sra-download.ncbi.nlm.nih.gov/traces/sra37/SRR/003085/SRR3160018	ftp://ftp.sra.ebi.ac.uk/vol1/fastq/SRR316/008/SRR3160018/SRR3160018_1.fastq.gz	ftp://ftp.sra.ebi.ac.uk/vol1/fastq/SRR316/008/SRR3160018/SRR3160018_2.fastq.gz	source_name: heart || age: 60 days old || tissue: heart || breed name: Large White	heart	Large White	60 days old	unknown
508	SRS1283335	Sus scrofa	PRJNA311523	SRR3160019	SRX1569866	RNA-Seq	cDNA	TRANSCRIPTOMIC	PAIRED	32.16	200	ILLUMINA	Illumina HiSeq 2500	https://sra-download.ncbi.nlm.nih.gov/traces/sra37/SRR/003085/SRR3160019	ftp://ftp.sra.ebi.ac.uk/vol1/fastq/SRR316/009/SRR3160019/SRR3160019_1.fastq.gz	ftp://ftp.sra.ebi.ac.uk/vol1/fastq/SRR316/009/SRR3160019/SRR3160019_2.fastq.gz	source_name: liver || age: 60 days old || tissue: liver || breed name: Large White	liver	Large White	60 days old	unknown
509	SRS1283336	Sus scrofa	PRJNA311523	SRR3160017	SRX1569864	RNA-Seq	cDNA	TRANSCRIPTOMIC	PAIRED	32.73	200	ILLUMINA	Illumina HiSeq 2500	https://sra-download.ncbi.nlm.nih.gov/traces/sra37/SRR/003085/SRR3160017	ftp://ftp.sra.ebi.ac.uk/vol1/fastq/SRR316/007/SRR3160017/SRR3160017_1.fastq.gz	ftp://ftp.sra.ebi.ac.uk/vol1/fastq/SRR316/007/SRR3160017/SRR3160017_2.fastq.gz	source_name: mixture of multiple tissues || age: 60 days old || tissue: mixture of multiple tissues || breed name: Landrace	mixture of multiple tissues	Landrace	60 days old	unknown
510	SRS1283337	Sus scrofa	PRJNA311523	SRR3160016	SRX1569863	RNA-Seq	cDNA	TRANSCRIPTOMIC	PAIRED	30.5	200	ILLUMINA	Illumina HiSeq 2500	https://sra-download.ncbi.nlm.nih.gov/traces/sra37/SRR/003085/SRR3160016	ftp://ftp.sra.ebi.ac.uk/vol1/fastq/SRR316/006/SRR3160016/SRR3160016_1.fastq.gz	ftp://ftp.sra.ebi.ac.uk/vol1/fastq/SRR316/006/SRR3160016/SRR3160016_2.fastq.gz	source_name: ovary || age: 60 days old || tissue: ovary || breed name: Landrace	ovary	Landrace	60 days old	unknown
511	SRS1283338	Sus scrofa	PRJNA311523	SRR3160015	SRX1569862	RNA-Seq	cDNA	TRANSCRIPTOMIC	PAIRED	33.46	200	ILLUMINA	Illumina HiSeq 2500	https://sra-download.ncbi.nlm.nih.gov/traces/sra37/SRR/003085/SRR3160015	ftp://ftp.sra.ebi.ac.uk/vol1/fastq/SRR316/005/SRR3160015/SRR3160015_1.fastq.gz	ftp://ftp.sra.ebi.ac.uk/vol1/fastq/SRR316/005/SRR3160015/SRR3160015_2.fastq.gz	source_name: subcutaneous adipose || age: 60 days old || tissue: subcutaneous adipose || breed name: Landrace	subcutaneous adipose	Landrace	60 days old	unknown
512	SRS1283339	Sus scrofa	PRJNA311523	SRR3160014	SRX1569861	RNA-Seq	cDNA	TRANSCRIPTOMIC	PAIRED	29.29	200	ILLUMINA	Illumina HiSeq 2500		ftp://ftp.sra.ebi.ac.uk/vol1/fastq/SRR316/004/SRR3160014/SRR3160014_1.fastq.gz	ftp://ftp.sra.ebi.ac.uk/vol1/fastq/SRR316/004/SRR3160014/SRR3160014_2.fastq.gz	source_name: longissimus dorsi muscle || age: 60 days old || tissue: longissimus dorsi muscle || breed name: Landrace	longissimus dorsi muscle	Landrace	60 days old	unknown
513	SRS1283340	Sus scrofa	PRJNA311523	SRR3160013	SRX1569860	RNA-Seq	cDNA	TRANSCRIPTOMIC	PAIRED	36.29	200	ILLUMINA	Illumina HiSeq 2500	https://sra-download.ncbi.nlm.nih.gov/traces/sra37/SRR/003085/SRR3160013	ftp://ftp.sra.ebi.ac.uk/vol1/fastq/SRR316/003/SRR3160013/SRR3160013_1.fastq.gz	ftp://ftp.sra.ebi.ac.uk/vol1/fastq/SRR316/003/SRR3160013/SRR3160013_2.fastq.gz	source_name: psoas major muscle || age: 60 days old || tissue: psoas major muscle || breed name: Landrace	psoas major muscle	Landrace	60 days old	unknown
514	SRS1283341	Sus scrofa	PRJNA311523	SRR3160012	SRX1569859	RNA-Seq	cDNA	TRANSCRIPTOMIC	PAIRED	18.41	200	ILLUMINA	Illumina HiSeq 2500		ftp://ftp.sra.ebi.ac.uk/vol1/fastq/SRR316/002/SRR3160012/SRR3160012_1.fastq.gz	ftp://ftp.sra.ebi.ac.uk/vol1/fastq/SRR316/002/SRR3160012/SRR3160012_2.fastq.gz	source_name: kidney || age: 60 days old || tissue: kidney || breed name: Landrace	kidney	Landrace	60 days old	unknown
515	SRS1283342	Sus scrofa	PRJNA311523	SRR3160026	SRX1569873	RNA-Seq	cDNA	TRANSCRIPTOMIC	PAIRED	22.69	200	ILLUMINA	Illumina HiSeq 2500	https://sra-download.ncbi.nlm.nih.gov/traces/sra37/SRR/003085/SRR3160026	ftp://ftp.sra.ebi.ac.uk/vol1/fastq/SRR316/006/SRR3160026/SRR3160026_1.fastq.gz	ftp://ftp.sra.ebi.ac.uk/vol1/fastq/SRR316/006/SRR3160026/SRR3160026_2.fastq.gz	source_name: ovary || age: 60 days old || tissue: ovary || breed name: Large White	ovary	Large White	60 days old	unknown
516	SRS1283343	Sus scrofa	PRJNA311523	SRR3160011	SRX1569858	RNA-Seq	cDNA	TRANSCRIPTOMIC	PAIRED	25.85	200	ILLUMINA	Illumina HiSeq 2500		ftp://ftp.sra.ebi.ac.uk/vol1/fastq/SRR316/001/SRR3160011/SRR3160011_1.fastq.gz	ftp://ftp.sra.ebi.ac.uk/vol1/fastq/SRR316/001/SRR3160011/SRR3160011_2.fastq.gz	source_name: lung || age: 60 days old || tissue: lung || breed name: Landrace	lung	Landrace	60 days old	unknown
517	SRS1283344	Sus scrofa	PRJNA311523	SRR3160010	SRX1569857	RNA-Seq	cDNA	TRANSCRIPTOMIC	PAIRED	23.72	200	ILLUMINA	Illumina HiSeq 2500		ftp://ftp.sra.ebi.ac.uk/vol1/fastq/SRR316/000/SRR3160010/SRR3160010_1.fastq.gz	ftp://ftp.sra.ebi.ac.uk/vol1/fastq/SRR316/000/SRR3160010/SRR3160010_2.fastq.gz	source_name: spleen || age: 60 days old || tissue: spleen || breed name: Landrace	spleen	Landrace	60 days old	unknown
518	SRS1283345	Sus scrofa	PRJNA311523	SRR3160009	SRX1569856	RNA-Seq	cDNA	TRANSCRIPTOMIC	PAIRED	30.07	200	ILLUMINA	Illumina HiSeq 2500		ftp://ftp.sra.ebi.ac.uk/vol1/fastq/SRR316/009/SRR3160009/SRR3160009_1.fastq.gz	ftp://ftp.sra.ebi.ac.uk/vol1/fastq/SRR316/009/SRR3160009/SRR3160009_2.fastq.gz	source_name: liver || age: 60 days old || tissue: liver || breed name: Landrace	liver	Landrace	60 days old	unknown
519	SRS1283346	Sus scrofa	PRJNA311523	SRR3160008	SRX1569855	RNA-Seq	cDNA	TRANSCRIPTOMIC	PAIRED	27.12	200	ILLUMINA	Illumina HiSeq 2500		ftp://ftp.sra.ebi.ac.uk/vol1/fastq/SRR316/008/SRR3160008/SRR3160008_1.fastq.gz	ftp://ftp.sra.ebi.ac.uk/vol1/fastq/SRR316/008/SRR3160008/SRR3160008_2.fastq.gz	source_name: heart || age: 60 days old || tissue: heart || breed name: Landrace	heart	Landrace	60 days old	unknown
520	SRS1283347	Sus scrofa	PRJNA311523	SRR3160007	SRX1569854	RNA-Seq	cDNA	TRANSCRIPTOMIC	PAIRED	32.08	200	ILLUMINA	Illumina HiSeq 2500		ftp://ftp.sra.ebi.ac.uk/vol1/fastq/SRR316/007/SRR3160007/SRR3160007_1.fastq.gz	ftp://ftp.sra.ebi.ac.uk/vol1/fastq/SRR316/007/SRR3160007/SRR3160007_2.fastq.gz	source_name: mixture of multiple tissues || age: 60 days old || tissue: mixture of multiple tissues || breed name: Hampshire	mixture of multiple tissues	Hampshire	60 days old	unknown
521	SRS1283348	Sus scrofa	PRJNA311523	SRR3160006	SRX1569853	RNA-Seq	cDNA	TRANSCRIPTOMIC	PAIRED	19.85	200	ILLUMINA	Illumina HiSeq 2500	https://sra-download.ncbi.nlm.nih.gov/traces/sra37/SRR/003085/SRR3160006	ftp://ftp.sra.ebi.ac.uk/vol1/fastq/SRR316/006/SRR3160006/SRR3160006_1.fastq.gz	ftp://ftp.sra.ebi.ac.uk/vol1/fastq/SRR316/006/SRR3160006/SRR3160006_2.fastq.gz	source_name: ovary || age: 60 days old || tissue: ovary || breed name: Hampshire	ovary	Hampshire	60 days old	unknown
522	SRS1283349	Sus scrofa	PRJNA311523	SRR3160005	SRX1569852	RNA-Seq	cDNA	TRANSCRIPTOMIC	PAIRED	27.67	200	ILLUMINA	Illumina HiSeq 2500	https://sra-download.ncbi.nlm.nih.gov/traces/sra37/SRR/003085/SRR3160005	ftp://ftp.sra.ebi.ac.uk/vol1/fastq/SRR316/005/SRR3160005/SRR3160005_1.fastq.gz	ftp://ftp.sra.ebi.ac.uk/vol1/fastq/SRR316/005/SRR3160005/SRR3160005_2.fastq.gz	source_name: subcutaneous adipose || age: 60 days old || tissue: subcutaneous adipose || breed name: Hampshire	subcutaneous adipose	Hampshire	60 days old	unknown
523	SRS1283350	Sus scrofa	PRJNA311523	SRR3160004	SRX1569851	RNA-Seq	cDNA	TRANSCRIPTOMIC	PAIRED	27.55	200	ILLUMINA	Illumina HiSeq 2500		ftp://ftp.sra.ebi.ac.uk/vol1/fastq/SRR316/004/SRR3160004/SRR3160004_1.fastq.gz	ftp://ftp.sra.ebi.ac.uk/vol1/fastq/SRR316/004/SRR3160004/SRR3160004_2.fastq.gz	source_name: longissimus dorsi muscle || age: 60 days old || tissue: longissimus dorsi muscle || breed name: Hampshire	longissimus dorsi muscle	Hampshire	60 days old	unknown
524	SRS1283351	Sus scrofa	PRJNA311523	SRR3160003	SRX1569850	RNA-Seq	cDNA	TRANSCRIPTOMIC	PAIRED	23.36	200	ILLUMINA	Illumina HiSeq 2500	https://sra-download.ncbi.nlm.nih.gov/traces/sra37/SRR/003085/SRR3160003	ftp://ftp.sra.ebi.ac.uk/vol1/fastq/SRR316/003/SRR3160003/SRR3160003_1.fastq.gz	ftp://ftp.sra.ebi.ac.uk/vol1/fastq/SRR316/003/SRR3160003/SRR3160003_2.fastq.gz	source_name: psoas major muscle || age: 60 days old || tissue: psoas major muscle || breed name: Hampshire	psoas major muscle	Hampshire	60 days old	unknown
525	SRS1283352	Sus scrofa	PRJNA311523	SRR3160002	SRX1569849	RNA-Seq	cDNA	TRANSCRIPTOMIC	PAIRED	26.87	200	ILLUMINA	Illumina HiSeq 2500		ftp://ftp.sra.ebi.ac.uk/vol1/fastq/SRR316/002/SRR3160002/SRR3160002_1.fastq.gz	ftp://ftp.sra.ebi.ac.uk/vol1/fastq/SRR316/002/SRR3160002/SRR3160002_2.fastq.gz	source_name: kidney || age: 60 days old || tissue: kidney || breed name: Hampshire	kidney	Hampshire	60 days old	unknown
526	SRS1283353	Sus scrofa	PRJNA311523	SRR3160001	SRX1569848	RNA-Seq	cDNA	TRANSCRIPTOMIC	PAIRED	24.65	200	ILLUMINA	Illumina HiSeq 2500	https://sra-download.ncbi.nlm.nih.gov/traces/sra37/SRR/003085/SRR3160001	ftp://ftp.sra.ebi.ac.uk/vol1/fastq/SRR316/001/SRR3160001/SRR3160001_1.fastq.gz	ftp://ftp.sra.ebi.ac.uk/vol1/fastq/SRR316/001/SRR3160001/SRR3160001_2.fastq.gz	source_name: lung || age: 60 days old || tissue: lung || breed name: Hampshire	lung	Hampshire	60 days old	unknown
527	SRS1283354	Sus scrofa	PRJNA311523	SRR3160000	SRX1569847	RNA-Seq	cDNA	TRANSCRIPTOMIC	PAIRED	24.64	200	ILLUMINA	Illumina HiSeq 2500		ftp://ftp.sra.ebi.ac.uk/vol1/fastq/SRR316/000/SRR3160000/SRR3160000_1.fastq.gz	ftp://ftp.sra.ebi.ac.uk/vol1/fastq/SRR316/000/SRR3160000/SRR3160000_2.fastq.gz	source_name: spleen || age: 60 days old || tissue: spleen || breed name: Hampshire	spleen	Hampshire	60 days old	unknown
528	SRS1283355	Sus scrofa	PRJNA311523	SRR3159998	SRX1569845	RNA-Seq	cDNA	TRANSCRIPTOMIC	PAIRED	23.15	200	ILLUMINA	Illumina HiSeq 2500	https://sra-download.ncbi.nlm.nih.gov/traces/sra37/SRR/003085/SRR3159998	ftp://ftp.sra.ebi.ac.uk/vol1/fastq/SRR315/008/SRR3159998/SRR3159998_1.fastq.gz	ftp://ftp.sra.ebi.ac.uk/vol1/fastq/SRR315/008/SRR3159998/SRR3159998_2.fastq.gz	source_name: heart || age: 60 days old || tissue: heart || breed name: Hampshire	heart	Hampshire	60 days old	unknown
529	SRS1283356	Sus scrofa	PRJNA311523	SRR3159999	SRX1569846	RNA-Seq	cDNA	TRANSCRIPTOMIC	PAIRED	33.83	200	ILLUMINA	Illumina HiSeq 2500	https://sra-download.ncbi.nlm.nih.gov/traces/sra37/SRR/003085/SRR3159999	ftp://ftp.sra.ebi.ac.uk/vol1/fastq/SRR315/009/SRR3159999/SRR3159999_1.fastq.gz	ftp://ftp.sra.ebi.ac.uk/vol1/fastq/SRR315/009/SRR3159999/SRR3159999_2.fastq.gz	source_name: liver || age: 60 days old || tissue: liver || breed name: Hampshire	liver	Hampshire	60 days old	unknown
530	SRS1314910	Sus scrofa	PRJNA313448	SRR3194645	SRX1605244	RNA-Seq	cDNA	TRANSCRIPTOMIC	PAIRED	21.16	200	ILLUMINA	Illumina HiSeq 2000		ftp://ftp.sra.ebi.ac.uk/vol1/fastq/SRR319/005/SRR3194645/SRR3194645_1.fastq.gz	ftp://ftp.sra.ebi.ac.uk/vol1/fastq/SRR319/005/SRR3194645/SRR3194645_2.fastq.gz	source_name: 28 DPI_whole blood || animal id: 5009 || gender: female || days post infection: 28 DPI || wur marker type: AA || viremia level: 4.06702 || tissue: peripheral blood	peripheral blood	unknown	unknown	female
531	SRS1314911	Sus scrofa	PRJNA313448	SRR3194794	SRX1605393	RNA-Seq	cDNA	TRANSCRIPTOMIC	PAIRED	22.97	200	ILLUMINA	Illumina HiSeq 2000	https://sra-download.ncbi.nlm.nih.gov/traces/sra32/SRR/003119/SRR3194794	ftp://ftp.sra.ebi.ac.uk/vol1/fastq/SRR319/004/SRR3194794/SRR3194794_1.fastq.gz	ftp://ftp.sra.ebi.ac.uk/vol1/fastq/SRR319/004/SRR3194794/SRR3194794_2.fastq.gz	source_name: 7 DPI_whole blood || animal id: 5186 || gender: female || days post infection: 7 DPI || wur marker type: AG || viremia level: 6.36077 || tissue: peripheral blood	peripheral blood	unknown	unknown	female
532	SRS1314912	Sus scrofa	PRJNA313448	SRR3194793	SRX1605392	RNA-Seq	cDNA	TRANSCRIPTOMIC	PAIRED	23.03	200	ILLUMINA	Illumina HiSeq 2000		ftp://ftp.sra.ebi.ac.uk/vol1/fastq/SRR319/003/SRR3194793/SRR3194793_1.fastq.gz	ftp://ftp.sra.ebi.ac.uk/vol1/fastq/SRR319/003/SRR3194793/SRR3194793_2.fastq.gz	source_name: 4 DPI_whole blood || animal id: 5186 || gender: female || days post infection: 4 DPI || wur marker type: AG || viremia level: 5.8972 || tissue: peripheral blood	peripheral blood	unknown	unknown	female
533	SRS1314913	Sus scrofa	PRJNA313448	SRR3194624	SRX1605223	RNA-Seq	cDNA	TRANSCRIPTOMIC	PAIRED	11.89	200	ILLUMINA	Illumina HiSeq 2000		ftp://ftp.sra.ebi.ac.uk/vol1/fastq/SRR319/004/SRR3194624/SRR3194624_1.fastq.gz	ftp://ftp.sra.ebi.ac.uk/vol1/fastq/SRR319/004/SRR3194624/SRR3194624_2.fastq.gz	source_name: 28 DPI_whole blood || animal id: 5002 || gender: male || days post infection: 28 DPI || wur marker type: AA || viremia level: 5.56332 || tissue: peripheral blood	peripheral blood	unknown	unknown	male
534	SRS1314914	Sus scrofa	PRJNA313448	SRR3194792	SRX1605391	RNA-Seq	cDNA	TRANSCRIPTOMIC	PAIRED	24.2	200	ILLUMINA	Illumina HiSeq 2000	https://sra-download.ncbi.nlm.nih.gov/traces/sra35/SRR/003119/SRR3194792	ftp://ftp.sra.ebi.ac.uk/vol1/fastq/SRR319/002/SRR3194792/SRR3194792_1.fastq.gz	ftp://ftp.sra.ebi.ac.uk/vol1/fastq/SRR319/002/SRR3194792/SRR3194792_2.fastq.gz	source_name: 10 DPI_whole blood || animal id: 5186 || gender: female || days post infection: 10 DPI || wur marker type: AG || viremia level: 5.92806 || tissue: peripheral blood	peripheral blood	unknown	unknown	female
535	SRS1314915	Sus scrofa	PRJNA313448	SRR3194790	SRX1605389	RNA-Seq	cDNA	TRANSCRIPTOMIC	PAIRED	18.12	200	ILLUMINA	Illumina HiSeq 2000		ftp://ftp.sra.ebi.ac.uk/vol1/fastq/SRR319/000/SRR3194790/SRR3194790_1.fastq.gz	ftp://ftp.sra.ebi.ac.uk/vol1/fastq/SRR319/000/SRR3194790/SRR3194790_2.fastq.gz	source_name: 4 DPI_whole blood || animal id: 5178 || gender: female || days post infection: 4 DPI || wur marker type: AA || viremia level: 6.96072 || tissue: peripheral blood	peripheral blood	unknown	unknown	female
536	SRS1314916	Sus scrofa	PRJNA313448	SRR3194791	SRX1605390	RNA-Seq	cDNA	TRANSCRIPTOMIC	PAIRED	21.97	200	ILLUMINA	Illumina HiSeq 2000		ftp://ftp.sra.ebi.ac.uk/vol1/fastq/SRR319/001/SRR3194791/SRR3194791_1.fastq.gz	ftp://ftp.sra.ebi.ac.uk/vol1/fastq/SRR319/001/SRR3194791/SRR3194791_2.fastq.gz	source_name: 7 DPI_whole blood || animal id: 5178 || gender: female || days post infection: 7 DPI || wur marker type: AA || viremia level: 6.10568 || tissue: peripheral blood	peripheral blood	unknown	unknown	female
537	SRS1314917	Sus scrofa	PRJNA313448	SRR3194789	SRX1605388	RNA-Seq	cDNA	TRANSCRIPTOMIC	PAIRED	19.7	200	ILLUMINA	Illumina HiSeq 2000		ftp://ftp.sra.ebi.ac.uk/vol1/fastq/SRR319/009/SRR3194789/SRR3194789_1.fastq.gz	ftp://ftp.sra.ebi.ac.uk/vol1/fastq/SRR319/009/SRR3194789/SRR3194789_2.fastq.gz	source_name: 28 DPI_whole blood || animal id: 5178 || gender: female || days post infection: 28 DPI || wur marker type: AA || viremia level: 4.08846 || tissue: peripheral blood	peripheral blood	unknown	unknown	female
538	SRS1314918	Sus scrofa	PRJNA313448	SRR3194788	SRX1605387	RNA-Seq	cDNA	TRANSCRIPTOMIC	PAIRED	22.64	200	ILLUMINA	Illumina HiSeq 2000		ftp://ftp.sra.ebi.ac.uk/vol1/fastq/SRR319/008/SRR3194788/SRR3194788_1.fastq.gz	ftp://ftp.sra.ebi.ac.uk/vol1/fastq/SRR319/008/SRR3194788/SRR3194788_2.fastq.gz	source_name: 21 DPI_whole blood || animal id: 5178 || gender: female || days post infection: 21 DPI || wur marker type: AA || viremia level: 4.87701 || tissue: peripheral blood	peripheral blood	unknown	unknown	female
539	SRS1314919	Sus scrofa	PRJNA313448	SRR3194787	SRX1605386	RNA-Seq	cDNA	TRANSCRIPTOMIC	PAIRED	22.65	200	ILLUMINA	Illumina HiSeq 2000		ftp://ftp.sra.ebi.ac.uk/vol1/fastq/SRR319/007/SRR3194787/SRR3194787_1.fastq.gz	ftp://ftp.sra.ebi.ac.uk/vol1/fastq/SRR319/007/SRR3194787/SRR3194787_2.fastq.gz	source_name: 14 DPI_whole blood || animal id: 5178 || gender: female || days post infection: 14 DPI || wur marker type: AA || viremia level: 5.77613 || tissue: peripheral blood	peripheral blood	unknown	unknown	female
540	SRS1314920	Sus scrofa	PRJNA313448	SRR3194786	SRX1605385	RNA-Seq	cDNA	TRANSCRIPTOMIC	PAIRED	21.03	200	ILLUMINA	Illumina HiSeq 2000		ftp://ftp.sra.ebi.ac.uk/vol1/fastq/SRR319/006/SRR3194786/SRR3194786_1.fastq.gz	ftp://ftp.sra.ebi.ac.uk/vol1/fastq/SRR319/006/SRR3194786/SRR3194786_2.fastq.gz	source_name: 10 DPI_whole blood || animal id: 5178 || gender: female || days post infection: 10 DPI || wur marker type: AA || viremia level: 6.18302 || tissue: peripheral blood	peripheral blood	unknown	unknown	female
541	SRS1314921	Sus scrofa	PRJNA313448	SRR3194784	SRX1605383	RNA-Seq	cDNA	TRANSCRIPTOMIC	PAIRED	19.82	200	ILLUMINA	Illumina HiSeq 2000		ftp://ftp.sra.ebi.ac.uk/vol1/fastq/SRR319/004/SRR3194784/SRR3194784_1.fastq.gz	ftp://ftp.sra.ebi.ac.uk/vol1/fastq/SRR319/004/SRR3194784/SRR3194784_2.fastq.gz	source_name: 7 DPI_whole blood || animal id: 5170 || gender: male || days post infection: 7 DPI || wur marker type: AG || viremia level: 6.04059 || tissue: peripheral blood	peripheral blood	unknown	unknown	male
542	SRS1314922	Sus scrofa	PRJNA313448	SRR3194785	SRX1605384	RNA-Seq	cDNA	TRANSCRIPTOMIC	PAIRED	16.38	200	ILLUMINA	Illumina HiSeq 2000	https://sra-download.ncbi.nlm.nih.gov/traces/sra33/SRR/003119/SRR3194785	ftp://ftp.sra.ebi.ac.uk/vol1/fastq/SRR319/005/SRR3194785/SRR3194785_1.fastq.gz	ftp://ftp.sra.ebi.ac.uk/vol1/fastq/SRR319/005/SRR3194785/SRR3194785_2.fastq.gz	source_name: 0 DPI_whole blood || animal id: 5178 || gender: female || days post infection: 0 DPI || wur marker type: AA || viremia level: 0 || tissue: peripheral blood	peripheral blood	unknown	unknown	female
543	SRS1314923	Sus scrofa	PRJNA313448	SRR3194783	SRX1605382	RNA-Seq	cDNA	TRANSCRIPTOMIC	PAIRED	20.13	200	ILLUMINA	Illumina HiSeq 2000		ftp://ftp.sra.ebi.ac.uk/vol1/fastq/SRR319/003/SRR3194783/SRR3194783_1.fastq.gz	ftp://ftp.sra.ebi.ac.uk/vol1/fastq/SRR319/003/SRR3194783/SRR3194783_2.fastq.gz	source_name: 4 DPI_whole blood || animal id: 5170 || gender: male || days post infection: 4 DPI || wur marker type: AG || viremia level: 6.26143 || tissue: peripheral blood	peripheral blood	unknown	unknown	male
544	SRS1314924	Sus scrofa	PRJNA313448	SRR3194782	SRX1605381	RNA-Seq	cDNA	TRANSCRIPTOMIC	PAIRED	19.99	200	ILLUMINA	Illumina HiSeq 2000	https://sra-download.ncbi.nlm.nih.gov/traces/sra35/SRR/003119/SRR3194782	ftp://ftp.sra.ebi.ac.uk/vol1/fastq/SRR319/002/SRR3194782/SRR3194782_1.fastq.gz	ftp://ftp.sra.ebi.ac.uk/vol1/fastq/SRR319/002/SRR3194782/SRR3194782_2.fastq.gz	source_name: 28 DPI_whole blood || animal id: 5170 || gender: male || days post infection: 28 DPI || wur marker type: AG || viremia level: 4.5159 || tissue: peripheral blood	peripheral blood	unknown	unknown	male
545	SRS1314925	Sus scrofa	PRJNA313448	SRR3194781	SRX1605380	RNA-Seq	cDNA	TRANSCRIPTOMIC	PAIRED	23.5	200	ILLUMINA	Illumina HiSeq 2000		ftp://ftp.sra.ebi.ac.uk/vol1/fastq/SRR319/001/SRR3194781/SRR3194781_1.fastq.gz	ftp://ftp.sra.ebi.ac.uk/vol1/fastq/SRR319/001/SRR3194781/SRR3194781_2.fastq.gz	source_name: 21 DPI_whole blood || animal id: 5170 || gender: male || days post infection: 21 DPI || wur marker type: AG || viremia level: 1.90442 || tissue: peripheral blood	peripheral blood	unknown	unknown	male
546	SRS1314926	Sus scrofa	PRJNA313448	SRR3194780	SRX1605379	RNA-Seq	cDNA	TRANSCRIPTOMIC	PAIRED	21.25	200	ILLUMINA	Illumina HiSeq 2000	https://sra-download.ncbi.nlm.nih.gov/traces/sra35/SRR/003119/SRR3194780	ftp://ftp.sra.ebi.ac.uk/vol1/fastq/SRR319/000/SRR3194780/SRR3194780_1.fastq.gz	ftp://ftp.sra.ebi.ac.uk/vol1/fastq/SRR319/000/SRR3194780/SRR3194780_2.fastq.gz	source_name: 14 DPI_whole blood || animal id: 5170 || gender: male || days post infection: 14 DPI || wur marker type: AG || viremia level: 4.22691 || tissue: peripheral blood	peripheral blood	unknown	unknown	male
547	SRS1314927	Sus scrofa	PRJNA313448	SRR3194779	SRX1605378	RNA-Seq	cDNA	TRANSCRIPTOMIC	PAIRED	20.92	200	ILLUMINA	Illumina HiSeq 2000		ftp://ftp.sra.ebi.ac.uk/vol1/fastq/SRR319/009/SRR3194779/SRR3194779_1.fastq.gz	ftp://ftp.sra.ebi.ac.uk/vol1/fastq/SRR319/009/SRR3194779/SRR3194779_2.fastq.gz	source_name: 10 DPI_whole blood || animal id: 5170 || gender: male || days post infection: 10 DPI || wur marker type: AG || viremia level: 4.9114 || tissue: peripheral blood	peripheral blood	unknown	unknown	male
548	SRS1314928	Sus scrofa	PRJNA313448	SRR3194778	SRX1605377	RNA-Seq	cDNA	TRANSCRIPTOMIC	PAIRED	19.77	200	ILLUMINA	Illumina HiSeq 2000		ftp://ftp.sra.ebi.ac.uk/vol1/fastq/SRR319/008/SRR3194778/SRR3194778_1.fastq.gz	ftp://ftp.sra.ebi.ac.uk/vol1/fastq/SRR319/008/SRR3194778/SRR3194778_2.fastq.gz	source_name: 0 DPI_whole blood || animal id: 5170 || gender: male || days post infection: 0 DPI || wur marker type: AG || viremia level: 0 || tissue: peripheral blood	peripheral blood	unknown	unknown	male
549	SRS1314929	Sus scrofa	PRJNA313448	SRR3194777	SRX1605376	RNA-Seq	cDNA	TRANSCRIPTOMIC	PAIRED	19.42	200	ILLUMINA	Illumina HiSeq 2000		ftp://ftp.sra.ebi.ac.uk/vol1/fastq/SRR319/007/SRR3194777/SRR3194777_1.fastq.gz	ftp://ftp.sra.ebi.ac.uk/vol1/fastq/SRR319/007/SRR3194777/SRR3194777_2.fastq.gz	source_name: 7 DPI_whole blood || animal id: 5159 || gender: female || days post infection: 7 DPI || wur marker type: AA || viremia level: 5.64635 || tissue: peripheral blood	peripheral blood	unknown	unknown	female
550	SRS1314930	Sus scrofa	PRJNA313448	SRR3194776	SRX1605375	RNA-Seq	cDNA	TRANSCRIPTOMIC	PAIRED	23.4	200	ILLUMINA	Illumina HiSeq 2000		ftp://ftp.sra.ebi.ac.uk/vol1/fastq/SRR319/006/SRR3194776/SRR3194776_1.fastq.gz	ftp://ftp.sra.ebi.ac.uk/vol1/fastq/SRR319/006/SRR3194776/SRR3194776_2.fastq.gz	source_name: 4 DPI_whole blood || animal id: 5159 || gender: female || days post infection: 4 DPI || wur marker type: AA || viremia level: 6.44178 || tissue: peripheral blood	peripheral blood	unknown	unknown	female
551	SRS1314931	Sus scrofa	PRJNA313448	SRR3194775	SRX1605374	RNA-Seq	cDNA	TRANSCRIPTOMIC	PAIRED	25.05	200	ILLUMINA	Illumina HiSeq 2000		ftp://ftp.sra.ebi.ac.uk/vol1/fastq/SRR319/005/SRR3194775/SRR3194775_1.fastq.gz	ftp://ftp.sra.ebi.ac.uk/vol1/fastq/SRR319/005/SRR3194775/SRR3194775_2.fastq.gz	source_name: 28 DPI_whole blood || animal id: 5159 || gender: female || days post infection: 28 DPI || wur marker type: AA || viremia level: 2.06553 || tissue: peripheral blood	peripheral blood	unknown	unknown	female
552	SRS1314932	Sus scrofa	PRJNA313448	SRR3194774	SRX1605373	RNA-Seq	cDNA	TRANSCRIPTOMIC	PAIRED	18.29	200	ILLUMINA	Illumina HiSeq 2000	https://sra-download.ncbi.nlm.nih.gov/traces/sra35/SRR/003119/SRR3194774	ftp://ftp.sra.ebi.ac.uk/vol1/fastq/SRR319/004/SRR3194774/SRR3194774_1.fastq.gz	ftp://ftp.sra.ebi.ac.uk/vol1/fastq/SRR319/004/SRR3194774/SRR3194774_2.fastq.gz	source_name: 21 DPI_whole blood || animal id: 5159 || gender: female || days post infection: 21 DPI || wur marker type: AA || viremia level: 2.10816 || tissue: peripheral blood	peripheral blood	unknown	unknown	female
553	SRS1314933	Sus scrofa	PRJNA313448	SRR3194773	SRX1605372	RNA-Seq	cDNA	TRANSCRIPTOMIC	PAIRED	21.52	200	ILLUMINA	Illumina HiSeq 2000	https://sra-download.ncbi.nlm.nih.gov/traces/sra33/SRR/003119/SRR3194773	ftp://ftp.sra.ebi.ac.uk/vol1/fastq/SRR319/003/SRR3194773/SRR3194773_1.fastq.gz	ftp://ftp.sra.ebi.ac.uk/vol1/fastq/SRR319/003/SRR3194773/SRR3194773_2.fastq.gz	source_name: 14 DPI_whole blood || animal id: 5159 || gender: female || days post infection: 14 DPI || wur marker type: AA || viremia level: 4.84992 || tissue: peripheral blood	peripheral blood	unknown	unknown	female
554	SRS1314934	Sus scrofa	PRJNA313448	SRR3194772	SRX1605371	RNA-Seq	cDNA	TRANSCRIPTOMIC	PAIRED	21.92	200	ILLUMINA	Illumina HiSeq 2000		ftp://ftp.sra.ebi.ac.uk/vol1/fastq/SRR319/002/SRR3194772/SRR3194772_1.fastq.gz	ftp://ftp.sra.ebi.ac.uk/vol1/fastq/SRR319/002/SRR3194772/SRR3194772_2.fastq.gz	source_name: 10 DPI_whole blood || animal id: 5159 || gender: female || days post infection: 10 DPI || wur marker type: AA || viremia level: 5.6447 || tissue: peripheral blood	peripheral blood	unknown	unknown	female
555	SRS1314935	Sus scrofa	PRJNA313448	SRR3194771	SRX1605370	RNA-Seq	cDNA	TRANSCRIPTOMIC	PAIRED	18.6	200	ILLUMINA	Illumina HiSeq 2000		ftp://ftp.sra.ebi.ac.uk/vol1/fastq/SRR319/001/SRR3194771/SRR3194771_1.fastq.gz	ftp://ftp.sra.ebi.ac.uk/vol1/fastq/SRR319/001/SRR3194771/SRR3194771_2.fastq.gz	source_name: 0 DPI_whole blood || animal id: 5159 || gender: female || days post infection: 0 DPI || wur marker type: AA || viremia level: 0 || tissue: peripheral blood	peripheral blood	unknown	unknown	female
556	SRS1314936	Sus scrofa	PRJNA313448	SRR3194770	SRX1605369	RNA-Seq	cDNA	TRANSCRIPTOMIC	PAIRED	21.26	200	ILLUMINA	Illumina HiSeq 2000	https://sra-download.ncbi.nlm.nih.gov/traces/sra35/SRR/003119/SRR3194770	ftp://ftp.sra.ebi.ac.uk/vol1/fastq/SRR319/000/SRR3194770/SRR3194770_1.fastq.gz	ftp://ftp.sra.ebi.ac.uk/vol1/fastq/SRR319/000/SRR3194770/SRR3194770_2.fastq.gz	source_name: 7 DPI_whole blood || animal id: 5155 || gender: female || days post infection: 7 DPI || wur marker type: AA || viremia level: 6.13678 || tissue: peripheral blood	peripheral blood	unknown	unknown	female
557	SRS1314937	Sus scrofa	PRJNA313448	SRR3194769	SRX1605368	RNA-Seq	cDNA	TRANSCRIPTOMIC	PAIRED	26.6	200	ILLUMINA	Illumina HiSeq 2000	https://sra-download.ncbi.nlm.nih.gov/traces/sra35/SRR/003119/SRR3194769	ftp://ftp.sra.ebi.ac.uk/vol1/fastq/SRR319/009/SRR3194769/SRR3194769_1.fastq.gz	ftp://ftp.sra.ebi.ac.uk/vol1/fastq/SRR319/009/SRR3194769/SRR3194769_2.fastq.gz	source_name: 4 DPI_whole blood || animal id: 5155 || gender: female || days post infection: 4 DPI || wur marker type: AA || viremia level: 6.09158 || tissue: peripheral blood	peripheral blood	unknown	unknown	female
558	SRS1314938	Sus scrofa	PRJNA313448	SRR3194768	SRX1605367	RNA-Seq	cDNA	TRANSCRIPTOMIC	PAIRED	25.35	200	ILLUMINA	Illumina HiSeq 2000	https://sra-download.ncbi.nlm.nih.gov/traces/sra35/SRR/003119/SRR3194768	ftp://ftp.sra.ebi.ac.uk/vol1/fastq/SRR319/008/SRR3194768/SRR3194768_1.fastq.gz	ftp://ftp.sra.ebi.ac.uk/vol1/fastq/SRR319/008/SRR3194768/SRR3194768_2.fastq.gz	source_name: 21 DPI_whole blood || animal id: 5155 || gender: female || days post infection: 21 DPI || wur marker type: AA || viremia level: 3.18552 || tissue: peripheral blood	peripheral blood	unknown	unknown	female
559	SRS1314939	Sus scrofa	PRJNA313448	SRR3194767	SRX1605366	RNA-Seq	cDNA	TRANSCRIPTOMIC	PAIRED	30.86	200	ILLUMINA	Illumina HiSeq 2000	https://sra-download.ncbi.nlm.nih.gov/traces/sra35/SRR/003119/SRR3194767	ftp://ftp.sra.ebi.ac.uk/vol1/fastq/SRR319/007/SRR3194767/SRR3194767_1.fastq.gz	ftp://ftp.sra.ebi.ac.uk/vol1/fastq/SRR319/007/SRR3194767/SRR3194767_2.fastq.gz	source_name: 14 DPI_whole blood || animal id: 5155 || gender: female || days post infection: 14 DPI || wur marker type: AA || viremia level: 4.71671 || tissue: peripheral blood	peripheral blood	unknown	unknown	female
560	SRS1314940	Sus scrofa	PRJNA313448	SRR3194766	SRX1605365	RNA-Seq	cDNA	TRANSCRIPTOMIC	PAIRED	24.93	200	ILLUMINA	Illumina HiSeq 2000	https://sra-download.ncbi.nlm.nih.gov/traces/sra35/SRR/003119/SRR3194766	ftp://ftp.sra.ebi.ac.uk/vol1/fastq/SRR319/006/SRR3194766/SRR3194766_1.fastq.gz	ftp://ftp.sra.ebi.ac.uk/vol1/fastq/SRR319/006/SRR3194766/SRR3194766_2.fastq.gz	source_name: 11 DPI_whole blood || animal id: 5155 || gender: female || days post infection: 11 DPI || wur marker type: AA || viremia level: 5.42497 || tissue: peripheral blood	peripheral blood	unknown	unknown	female
561	SRS1314941	Sus scrofa	PRJNA313448	SRR3194765	SRX1605364	RNA-Seq	cDNA	TRANSCRIPTOMIC	PAIRED	23.96	200	ILLUMINA	Illumina HiSeq 2000	https://sra-download.ncbi.nlm.nih.gov/traces/sra35/SRR/003119/SRR3194765	ftp://ftp.sra.ebi.ac.uk/vol1/fastq/SRR319/005/SRR3194765/SRR3194765_1.fastq.gz	ftp://ftp.sra.ebi.ac.uk/vol1/fastq/SRR319/005/SRR3194765/SRR3194765_2.fastq.gz	source_name: 0 DPI_whole blood || animal id: 5155 || gender: female || days post infection: 0 DPI || wur marker type: AA || viremia level: 0 || tissue: peripheral blood	peripheral blood	unknown	unknown	female
562	SRS1314942	Sus scrofa	PRJNA313448	SRR3194764	SRX1605363	RNA-Seq	cDNA	TRANSCRIPTOMIC	PAIRED	31.82	200	ILLUMINA	Illumina HiSeq 2000		ftp://ftp.sra.ebi.ac.uk/vol1/fastq/SRR319/004/SRR3194764/SRR3194764_1.fastq.gz	ftp://ftp.sra.ebi.ac.uk/vol1/fastq/SRR319/004/SRR3194764/SRR3194764_2.fastq.gz	source_name: 7 DPI_whole blood || animal id: 5145 || gender: female || days post infection: 7 DPI || wur marker type: AA || viremia level: 6.26279 || tissue: peripheral blood	peripheral blood	unknown	unknown	female
563	SRS1314943	Sus scrofa	PRJNA313448	SRR3194763	SRX1605362	RNA-Seq	cDNA	TRANSCRIPTOMIC	PAIRED	26.71	200	ILLUMINA	Illumina HiSeq 2000		ftp://ftp.sra.ebi.ac.uk/vol1/fastq/SRR319/003/SRR3194763/SRR3194763_1.fastq.gz	ftp://ftp.sra.ebi.ac.uk/vol1/fastq/SRR319/003/SRR3194763/SRR3194763_2.fastq.gz	source_name: 28 DPI_whole blood || animal id: 5145 || gender: female || days post infection: 28 DPI || wur marker type: AA || viremia level: 2.2208 || tissue: peripheral blood	peripheral blood	unknown	unknown	female
564	SRS1314944	Sus scrofa	PRJNA313448	SRR3194762	SRX1605361	RNA-Seq	cDNA	TRANSCRIPTOMIC	PAIRED	39.96	200	ILLUMINA	Illumina HiSeq 2000	https://sra-download.ncbi.nlm.nih.gov/traces/sra36/SRR/003119/SRR3194762	ftp://ftp.sra.ebi.ac.uk/vol1/fastq/SRR319/002/SRR3194762/SRR3194762_1.fastq.gz	ftp://ftp.sra.ebi.ac.uk/vol1/fastq/SRR319/002/SRR3194762/SRR3194762_2.fastq.gz	source_name: 21 DPI_whole blood || animal id: 5145 || gender: female || days post infection: 21 DPI || wur marker type: AA || viremia level: 3.51606 || tissue: peripheral blood	peripheral blood	unknown	unknown	female
565	SRS1314945	Sus scrofa	PRJNA313448	SRR3194761	SRX1605360	RNA-Seq	cDNA	TRANSCRIPTOMIC	PAIRED	22.24	200	ILLUMINA	Illumina HiSeq 2000	https://sra-download.ncbi.nlm.nih.gov/traces/sra33/SRR/003119/SRR3194761	ftp://ftp.sra.ebi.ac.uk/vol1/fastq/SRR319/001/SRR3194761/SRR3194761_1.fastq.gz	ftp://ftp.sra.ebi.ac.uk/vol1/fastq/SRR319/001/SRR3194761/SRR3194761_2.fastq.gz	source_name: 14 DPI_whole blood || animal id: 5145 || gender: female || days post infection: 14 DPI || wur marker type: AA || viremia level: 5.73836 || tissue: peripheral blood	peripheral blood	unknown	unknown	female
566	SRS1314946	Sus scrofa	PRJNA313448	SRR3194760	SRX1605359	RNA-Seq	cDNA	TRANSCRIPTOMIC	PAIRED	19.71	200	ILLUMINA	Illumina HiSeq 2000	https://sra-download.ncbi.nlm.nih.gov/traces/sra33/SRR/003119/SRR3194760	ftp://ftp.sra.ebi.ac.uk/vol1/fastq/SRR319/000/SRR3194760/SRR3194760_1.fastq.gz	ftp://ftp.sra.ebi.ac.uk/vol1/fastq/SRR319/000/SRR3194760/SRR3194760_2.fastq.gz	source_name: 10 DPI_whole blood || animal id: 5145 || gender: female || days post infection: 10 DPI || wur marker type: AA || viremia level: 6.01051 || tissue: peripheral blood	peripheral blood	unknown	unknown	female
567	SRS1314947	Sus scrofa	PRJNA313448	SRR3194759	SRX1605358	RNA-Seq	cDNA	TRANSCRIPTOMIC	PAIRED	26.79	200	ILLUMINA	Illumina HiSeq 2000		ftp://ftp.sra.ebi.ac.uk/vol1/fastq/SRR319/009/SRR3194759/SRR3194759_1.fastq.gz	ftp://ftp.sra.ebi.ac.uk/vol1/fastq/SRR319/009/SRR3194759/SRR3194759_2.fastq.gz	source_name: 0 DPI_whole blood || animal id: 5145 || gender: female || days post infection: 0 DPI || wur marker type: AA || viremia level: 0 || tissue: peripheral blood	peripheral blood	unknown	unknown	female
568	SRS1314948	Sus scrofa	PRJNA313448	SRR3194758	SRX1605357	RNA-Seq	cDNA	TRANSCRIPTOMIC	PAIRED	35.17	200	ILLUMINA	Illumina HiSeq 2000		ftp://ftp.sra.ebi.ac.uk/vol1/fastq/SRR319/008/SRR3194758/SRR3194758_1.fastq.gz	ftp://ftp.sra.ebi.ac.uk/vol1/fastq/SRR319/008/SRR3194758/SRR3194758_2.fastq.gz	source_name: 7 DPI_whole blood || animal id: 5142 || gender: female || days post infection: 7 DPI || wur marker type: AA || viremia level: 5.71785 || tissue: peripheral blood	peripheral blood	unknown	unknown	female
569	SRS1314949	Sus scrofa	PRJNA313448	SRR3194757	SRX1605356	RNA-Seq	cDNA	TRANSCRIPTOMIC	PAIRED	25.98	200	ILLUMINA	Illumina HiSeq 2000		ftp://ftp.sra.ebi.ac.uk/vol1/fastq/SRR319/007/SRR3194757/SRR3194757_1.fastq.gz	ftp://ftp.sra.ebi.ac.uk/vol1/fastq/SRR319/007/SRR3194757/SRR3194757_2.fastq.gz	source_name: 4 DPI_whole blood || animal id: 5142 || gender: female || days post infection: 4 DPI || wur marker type: AA || viremia level: 5.67504 || tissue: peripheral blood	peripheral blood	unknown	unknown	female
570	SRS1314950	Sus scrofa	PRJNA313448	SRR3194756	SRX1605355	RNA-Seq	cDNA	TRANSCRIPTOMIC	PAIRED	38.24	200	ILLUMINA	Illumina HiSeq 2000	https://sra-download.ncbi.nlm.nih.gov/traces/sra35/SRR/003119/SRR3194756	ftp://ftp.sra.ebi.ac.uk/vol1/fastq/SRR319/006/SRR3194756/SRR3194756_1.fastq.gz	ftp://ftp.sra.ebi.ac.uk/vol1/fastq/SRR319/006/SRR3194756/SRR3194756_2.fastq.gz	source_name: 21 DPI_whole blood || animal id: 5142 || gender: female || days post infection: 21 DPI || wur marker type: AA || viremia level: 3.837 || tissue: peripheral blood	peripheral blood	unknown	unknown	female
571	SRS1314951	Sus scrofa	PRJNA313448	SRR3194755	SRX1605354	RNA-Seq	cDNA	TRANSCRIPTOMIC	PAIRED	29.07	200	ILLUMINA	Illumina HiSeq 2000	https://sra-download.ncbi.nlm.nih.gov/traces/sra35/SRR/003119/SRR3194755	ftp://ftp.sra.ebi.ac.uk/vol1/fastq/SRR319/005/SRR3194755/SRR3194755_1.fastq.gz	ftp://ftp.sra.ebi.ac.uk/vol1/fastq/SRR319/005/SRR3194755/SRR3194755_2.fastq.gz	source_name: 14 DPI_whole blood || animal id: 5142 || gender: female || days post infection: 14 DPI || wur marker type: AA || viremia level: 4.77526 || tissue: peripheral blood	peripheral blood	unknown	unknown	female
572	SRS1314952	Sus scrofa	PRJNA313448	SRR3194754	SRX1605353	RNA-Seq	cDNA	TRANSCRIPTOMIC	PAIRED	25.77	200	ILLUMINA	Illumina HiSeq 2000		ftp://ftp.sra.ebi.ac.uk/vol1/fastq/SRR319/004/SRR3194754/SRR3194754_1.fastq.gz	ftp://ftp.sra.ebi.ac.uk/vol1/fastq/SRR319/004/SRR3194754/SRR3194754_2.fastq.gz	source_name: 10 DPI_whole blood || animal id: 5142 || gender: female || days post infection: 10 DPI || wur marker type: AA || viremia level: 5.70831 || tissue: peripheral blood	peripheral blood	unknown	unknown	female
573	SRS1314953	Sus scrofa	PRJNA313448	SRR3194753	SRX1605352	RNA-Seq	cDNA	TRANSCRIPTOMIC	PAIRED	21.57	200	ILLUMINA	Illumina HiSeq 2000	https://sra-download.ncbi.nlm.nih.gov/traces/sra33/SRR/003119/SRR3194753	ftp://ftp.sra.ebi.ac.uk/vol1/fastq/SRR319/003/SRR3194753/SRR3194753_1.fastq.gz	ftp://ftp.sra.ebi.ac.uk/vol1/fastq/SRR319/003/SRR3194753/SRR3194753_2.fastq.gz	source_name: 0 DPI_whole blood || animal id: 5142 || gender: female || days post infection: 0 DPI || wur marker type: AA || viremia level: 0 || tissue: peripheral blood	peripheral blood	unknown	unknown	female
574	SRS1314954	Sus scrofa	PRJNA313448	SRR3194752	SRX1605351	RNA-Seq	cDNA	TRANSCRIPTOMIC	PAIRED	22.92	200	ILLUMINA	Illumina HiSeq 2000	https://sra-download.ncbi.nlm.nih.gov/traces/sra33/SRR/003119/SRR3194752	ftp://ftp.sra.ebi.ac.uk/vol1/fastq/SRR319/002/SRR3194752/SRR3194752_1.fastq.gz	ftp://ftp.sra.ebi.ac.uk/vol1/fastq/SRR319/002/SRR3194752/SRR3194752_2.fastq.gz	source_name: 7 DPI_whole blood || animal id: 5119 || gender: female || days post infection: 7 DPI || wur marker type: AA || viremia level: 6.19244 || tissue: peripheral blood	peripheral blood	unknown	unknown	female
575	SRS1314955	Sus scrofa	PRJNA313448	SRR3194751	SRX1605350	RNA-Seq	cDNA	TRANSCRIPTOMIC	PAIRED	17.8	200	ILLUMINA	Illumina HiSeq 2000	https://sra-download.ncbi.nlm.nih.gov/traces/sra33/SRR/003119/SRR3194751	ftp://ftp.sra.ebi.ac.uk/vol1/fastq/SRR319/001/SRR3194751/SRR3194751_1.fastq.gz	ftp://ftp.sra.ebi.ac.uk/vol1/fastq/SRR319/001/SRR3194751/SRR3194751_2.fastq.gz	source_name: 4 DPI_whole blood || animal id: 5119 || gender: female || days post infection: 4 DPI || wur marker type: AA || viremia level: 5.96315 || tissue: peripheral blood	peripheral blood	unknown	unknown	female
576	SRS1314956	Sus scrofa	PRJNA313448	SRR3194750	SRX1605349	RNA-Seq	cDNA	TRANSCRIPTOMIC	PAIRED	19.09	200	ILLUMINA	Illumina HiSeq 2000		ftp://ftp.sra.ebi.ac.uk/vol1/fastq/SRR319/000/SRR3194750/SRR3194750_1.fastq.gz	ftp://ftp.sra.ebi.ac.uk/vol1/fastq/SRR319/000/SRR3194750/SRR3194750_2.fastq.gz	source_name: 28 DPI_whole blood || animal id: 5119 || gender: female || days post infection: 28 DPI || wur marker type: AA || viremia level: 0.37597 || tissue: peripheral blood	peripheral blood	unknown	unknown	female
577	SRS1314957	Sus scrofa	PRJNA313448	SRR3194749	SRX1605348	RNA-Seq	cDNA	TRANSCRIPTOMIC	PAIRED	22.14	200	ILLUMINA	Illumina HiSeq 2000	https://sra-download.ncbi.nlm.nih.gov/traces/sra33/SRR/003119/SRR3194749	ftp://ftp.sra.ebi.ac.uk/vol1/fastq/SRR319/009/SRR3194749/SRR3194749_1.fastq.gz	ftp://ftp.sra.ebi.ac.uk/vol1/fastq/SRR319/009/SRR3194749/SRR3194749_2.fastq.gz	source_name: 21 DPI_whole blood || animal id: 5119 || gender: female || days post infection: 21 DPI || wur marker type: AA || viremia level: 1.37066 || tissue: peripheral blood	peripheral blood	unknown	unknown	female
578	SRS1314958	Sus scrofa	PRJNA313448	SRR3194748	SRX1605347	RNA-Seq	cDNA	TRANSCRIPTOMIC	PAIRED	20.39	200	ILLUMINA	Illumina HiSeq 2000		ftp://ftp.sra.ebi.ac.uk/vol1/fastq/SRR319/008/SRR3194748/SRR3194748_1.fastq.gz	ftp://ftp.sra.ebi.ac.uk/vol1/fastq/SRR319/008/SRR3194748/SRR3194748_2.fastq.gz	source_name: 14 DPI_whole blood || animal id: 5119 || gender: female || days post infection: 14 DPI || wur marker type: AA || viremia level: 3.81659 || tissue: peripheral blood	peripheral blood	unknown	unknown	female
579	SRS1314959	Sus scrofa	PRJNA313448	SRR3194747	SRX1605346	RNA-Seq	cDNA	TRANSCRIPTOMIC	PAIRED	17.47	200	ILLUMINA	Illumina HiSeq 2000		ftp://ftp.sra.ebi.ac.uk/vol1/fastq/SRR319/007/SRR3194747/SRR3194747_1.fastq.gz	ftp://ftp.sra.ebi.ac.uk/vol1/fastq/SRR319/007/SRR3194747/SRR3194747_2.fastq.gz	source_name: 10 DPI_whole blood || animal id: 5119 || gender: female || days post infection: 10 DPI || wur marker type: AA || viremia level: 4.79293 || tissue: peripheral blood	peripheral blood	unknown	unknown	female
[truncated: 337 more rows]
