# Supplementary material for: Functional Annotation of the Transcriptome of the Pig, Sus scrofa, Based Upon Network Analysis of an RNAseq Transcriptional Atlas
Source: Front Genet. 2020 Feb 14;10:1355. doi: 10.3389/fgene.2019.01355 (PMC7034361; doi:10.3389/fgene.2019.01355)
Supplement: Supplementary file 3 [file Table_2.xlsx]

## Sheet: ReadMe
Supplementary Table S2
Network analysis of the pig transcriptional atlas
Sample description and colour coding for histograms
	List of samples across the graphs	Note re sex of samples The sex of the sample is indicated on the upper coloured bar. Here blue is female, green is male, teal is pooled sexes and pink is unknown. The sex indicated is taken from the metadata; where it was not indicated the source files and publications were searched to obtain the sex. For fetal and embryo samples there was no sex allocated. NB this does not always match the Y gen…
	heart (BioProject: PRJNA297855 | Breed: Guizhou mini-pigs | Sex: unknown)
	heart (BioProject: PRJNA311523 | Breed: Bamei | Sex: unknown)
	heart (BioProject: PRJNA311523 | Breed: Berkshire | Sex: unknown)
	heart (BioProject: PRJNA311523 | Breed: Hampshire | Sex: unknown)
	heart (BioProject: PRJNA311523 | Breed: Jinhua | Sex: unknown)
	heart (BioProject: PRJNA311523 | Breed: Landrace | Sex: unknown)
	heart (BioProject: PRJNA311523 | Breed: Large White | Sex: unknown)
	heart (BioProject: PRJNA311523 | Breed: Meishan | Sex: unknown)
	heart (BioProject: PRJNA311523 | Breed: Pietrain | Sex: unknown)		Female
	heart (BioProject: PRJNA311523 | Breed: Rongchang | Sex: unknown)		Male reproductive sysstem
	heart (BioProject: PRJNA359208 | Breed: Yorkshire | Sex: male)		Pooled
	heart left ventricle (BioProject: PRJEB19386 | Breed: Duroc | Sex: female)		Unknown
	heart left ventricle (BioProject: PRJEB19386 | Breed: Duroc | Sex: male)
	biceps femoris muscle (BioProject: PRJNA297337 | Breed: crossbred Iberian x Duroc | Sex: male)
	biceps femoris muscle (BioProject: PRJNA297337 | Breed: pure Iberian | Sex: male)
	gluteus medius muscle (BioProject: PRJNA326880 | Breed: Polish Landrace | Sex: unknown)
	longissimus dorsi muscle (BioProject: PRJNA297855 | Breed: Guizhou mini-pigs | Sex: unknown)
	longissimus dorsi muscle (BioProject: PRJNA297855 | Breed: multiple breeds | Sex: unknown)
	longissimus dorsi muscle (BioProject: PRJNA302287 | Breed: Wannanhua | Sex: unknown)
	longissimus dorsi muscle (BioProject: PRJNA302287 | Breed: Yorkshire | Sex: unknown)	Note re organ system The organ system allocated is taken from the metadata and is not always entirely appropriate, for example pituitary is included in nervous system rather than endocrine system. Colour coding for the organ systems is shown below.
	longissimus dorsi muscle (BioProject: PRJNA311523 | Breed: Bamei | Sex: unknown)
	longissimus dorsi muscle (BioProject: PRJNA311523 | Breed: Berkshire | Sex: unknown)
	longissimus dorsi muscle (BioProject: PRJNA311523 | Breed: Hampshire | Sex: unknown)
	longissimus dorsi muscle (BioProject: PRJNA311523 | Breed: Jinhua | Sex: unknown)		Muscular system
	longissimus dorsi muscle (BioProject: PRJNA311523 | Breed: Landrace | Sex: unknown)		Integumentary system
	longissimus dorsi muscle (BioProject: PRJNA311523 | Breed: Large White | Sex: unknown)		Not available
	longissimus dorsi muscle (BioProject: PRJNA311523 | Breed: Meishan | Sex: unknown)		Gastrointestinal tract
	longissimus dorsi muscle (BioProject: PRJNA311523 | Breed: Pietrain | Sex: unknown)		Nervous system
	longissimus dorsi muscle (BioProject: PRJNA311523 | Breed: Rongchang | Sex: unknown)		Renal system
	longissimus dorsi muscle (BioProject: PRJNA311523 | Breed: Tibetan wild boar | Sex: unknown)		Endocrine system
	longissimus dorsi muscle (BioProject: PRJNA340232 | Breed: unknown | Sex: unknown)		Respiratory system
	longissimus dorsi muscle (BioProject: PRJNA341938 | Breed: unknown | Sex: male)		Immune system
	longissimus dorsi muscle (BioProject: PRJNA389512 | Breed: Large White pig | Sex: unknown)		Male reproductive sysstem
	longissimus dorsi muscle (BioProject: PRJNA389512 | Breed: Wujin pig | Sex: unknown)		Female reproductive system
	psoas major muscle (BioProject: PRJNA311523 | Breed: Bamei | Sex: unknown)		Mixture of tissues
	psoas major muscle (BioProject: PRJNA311523 | Breed: Berkshire | Sex: unknown)
	psoas major muscle (BioProject: PRJNA311523 | Breed: Hampshire | Sex: unknown)
	psoas major muscle (BioProject: PRJNA311523 | Breed: Jinhua | Sex: unknown)
	psoas major muscle (BioProject: PRJNA311523 | Breed: Landrace | Sex: unknown)
	psoas major muscle (BioProject: PRJNA311523 | Breed: Large White | Sex: unknown)
	psoas major muscle (BioProject: PRJNA311523 | Breed: Meishan | Sex: unknown)
	psoas major muscle (BioProject: PRJNA311523 | Breed: Pietrain | Sex: unknown)
	psoas major muscle (BioProject: PRJNA311523 | Breed: Rongchang | Sex: unknown)
	psoas major muscle (BioProject: PRJNA311523 | Breed: Tibetan wild boar | Sex: unknown)
	skeletal muscle (BioProject: PRJNA325481 | Breed: DLY | Sex: unknown)
	skeletal muscle tissue (BioProject: PRJEB19386 | Breed: Duroc | Sex: female)
	skeletal muscle tissue (BioProject: PRJEB19386 | Breed: Duroc | Sex: male)
	muscle (BioProject: PRJNA246567 | Breed: unknown | Sex: female)
	muscle (BioProject: PRJNA246567 | Breed: unknown | Sex: male)
	muscle (BioProject: PRJNA354523 | Breed: unknown | Sex: unknown)
	backfat (BioProject: PRJNA234335 | Breed: songliao black pigs | Sex: female)
	backfat (BioProject: PRJNA305784 | Breed: unknown | Sex: female)
	backfat (BioProject: PRJNA305784 | Breed: unknown | Sex: male)
	subcutaneous adipose (BioProject: PRJNA260632 | Breed: unknown | Sex: female)
	subcutaneous adipose (BioProject: PRJNA260632 | Breed: unknown | Sex: male)
	subcutaneous adipose (BioProject: PRJNA311523 | Breed: Bamei | Sex: unknown)
	subcutaneous adipose (BioProject: PRJNA311523 | Breed: Berkshire | Sex: unknown)
	subcutaneous adipose (BioProject: PRJNA311523 | Breed: Hampshire | Sex: unknown)
	subcutaneous adipose (BioProject: PRJNA311523 | Breed: Jinhua | Sex: unknown)
	subcutaneous adipose (BioProject: PRJNA311523 | Breed: Landrace | Sex: unknown)
	subcutaneous adipose (BioProject: PRJNA311523 | Breed: Large White | Sex: unknown)
	subcutaneous adipose (BioProject: PRJNA311523 | Breed: Meishan | Sex: unknown)
	subcutaneous adipose (BioProject: PRJNA311523 | Breed: Pietrain | Sex: unknown)
	subcutaneous adipose (BioProject: PRJNA311523 | Breed: Rongchang | Sex: unknown)
	adipose (BioProject: PRJNA297855 | Breed: Guizhou mini-pigs | Sex: unknown)
	fat (BioProject: PRJNA305784 | Breed: unknown | Sex: female)
	ear (BioProject: PRJNA319492 | Breed: Sutai | Sex: unknown)
	inner ear stria vascularis (BioProject: PRJNA319623 | Breed: unknown | Sex: unknown)
	omentum (BioProject: PRJEB19386 | Breed: Duroc | Sex: female)
	omentum (BioProject: PRJEB19386 | Breed: Duroc | Sex: male)
	stomach (BioProject: PRJEB19386 | Breed: Duroc | Sex: female)
	stomach (BioProject: PRJEB19386 | Breed: Duroc | Sex: male)
	duodenum (BioProject: PRJEB19386 | Breed: Duroc | Sex: male)
	duodenum (BioProject: PRJNA271310 | Breed: Meishan piglets | Sex: male)
	ileum (BioProject: PRJEB19386 | Breed: Duroc | Sex: female)
	ileum (BioProject: PRJEB19386 | Breed: Duroc | Sex: male)
	caecum (BioProject: PRJEB19386 | Breed: Duroc | Sex: female)
	caecum (BioProject: PRJEB19386 | Breed: Duroc | Sex: male)
	colon (BioProject: PRJEB19386 | Breed: Duroc | Sex: female)
	colon (BioProject: PRJEB19386 | Breed: Duroc | Sex: male)
	amygdala (BioProject: PRJEB19386 | Breed: Duroc | Sex: female)
	brain (BioProject: PRJNA407675 | Breed: Landrace gilt | Sex: female)
	brain (BioProject: PRJNA407675 | Breed: Landrace gilt | Sex: male)
	amygdala (BioProject: PRJEB19386 | Breed: Duroc | Sex: male)
	brainstem (BioProject: PRJNA292166 | Breed: unknown | Sex: unknown)
	brainstem (BioProject: PRJEB19386 | Breed: Duroc | Sex: male)
	forebrain (BioProject: PRJNA292166 | Breed: unknown | Sex: unknown)
	corpus callosum (BioProject: PRJEB19386 | Breed: Duroc | Sex: female)
	corpus callosum (BioProject: PRJEB19386 | Breed: Duroc | Sex: male)
	dorsal plus ventral thalamus (BioProject: PRJEB19386 | Breed: Duroc | Sex: female)
	cortex (BioProject: PRJNA292166 | Breed: unknown | Sex: unknown)
	frontal cortex (BioProject: PRJEB19386 | Breed: Duroc | Sex: male)
	occipital cortex (BioProject: PRJEB19386 | Breed: Duroc | Sex: female)
	hippocampal formation (BioProject: PRJEB19386 | Breed: Duroc | Sex: female)
	hippocampal formation (BioProject: PRJEB19386 | Breed: Duroc | Sex: male)
	hippocampus (BioProject: PRJNA292166 | Breed: unknown | Sex: unknown)
	hypothalamus (BioProject: PRJNA225941 | Breed: Iberian x Landrace backcross | Sex: unknown)
	medulla oblongata (BioProject: PRJEB19386 | Breed: Duroc | Sex: female)
	medulla oblongata (BioProject: PRJEB19386 | Breed: Duroc | Sex: male)
	pons (BioProject: PRJEB19386 | Breed: Duroc | Sex: female)
	pituitary gland (BioProject: PRJEB19386 | Breed: Duroc | Sex: female)
	pituitary gland (BioProject: PRJEB19386 | Breed: Duroc | Sex: male)
	cortex of kidney (BioProject: PRJEB19386 | Breed: Duroc | Sex: female)
	cortex of kidney (BioProject: PRJEB19386 | Breed: Duroc | Sex: male)
	kidney (BioProject: PRJNA188070 | Breed: Tibetan | Sex: unknown)
	kidney (BioProject: PRJNA297855 | Breed: Guizhou mini-pigs | Sex: unknown)
	kidney (BioProject: PRJNA311523 | Breed: Bamei | Sex: unknown)
	kidney (BioProject: PRJNA311523 | Breed: Berkshire | Sex: unknown)
	kidney (BioProject: PRJNA311523 | Breed: Hampshire | Sex: unknown)
	kidney (BioProject: PRJNA311523 | Breed: Jinhua | Sex: unknown)
	kidney (BioProject: PRJNA311523 | Breed: Landrace | Sex: unknown)
	kidney (BioProject: PRJNA311523 | Breed: Large White | Sex: unknown)
	kidney (BioProject: PRJNA311523 | Breed: Meishan | Sex: unknown)
	kidney (BioProject: PRJNA311523 | Breed: Pietrain | Sex: unknown)
	kidney (BioProject: PRJNA311523 | Breed: Rongchang | Sex: unknown)
	kidney cell line (BioProject: PRJNA304281 | Breed: big white | Sex: male)
	liver (BioProject: PRJNA193204 | Breed: Berkshire | Sex: unknown)
	liver (BioProject: PRJNA240332 | Breed: Yorkshire-Landrace | Sex: unknown)
	liver (BioProject: PRJNA297855 | Breed: Guizhou mini-pigs | Sex: unknown)
	liver (BioProject: PRJNA305529 | Breed: unknown | Sex: male)
	liver (BioProject: PRJNA311523 | Breed: Bamei | Sex: unknown)
	liver (BioProject: PRJNA311523 | Breed: Berkshire | Sex: unknown)
	liver (BioProject: PRJNA311523 | Breed: Hampshire | Sex: unknown)
	liver (BioProject: PRJNA311523 | Breed: Jinhua | Sex: unknown)
	liver (BioProject: PRJNA311523 | Breed: Landrace | Sex: unknown)
	liver (BioProject: PRJNA311523 | Breed: Large White | Sex: unknown)
	liver (BioProject: PRJNA311523 | Breed: Meishan | Sex: unknown)
	liver (BioProject: PRJNA311523 | Breed: Pietrain | Sex: unknown)
	liver (BioProject: PRJNA311523 | Breed: Rongchang | Sex: unknown)
	liver (BioProject: PRJNA451072 | Breed: unknown | Sex: unknown)
	lung (BioProject: PRJNA311523 | Breed: Bamei | Sex: unknown)
	lung (BioProject: PRJNA311523 | Breed: Berkshire | Sex: unknown)
	lung (BioProject: PRJNA311523 | Breed: Hampshire | Sex: unknown)
	lung (BioProject: PRJNA311523 | Breed: Jinhua | Sex: unknown)
	lung (BioProject: PRJNA311523 | Breed: Landrace | Sex: unknown)
	lung (BioProject: PRJNA311523 | Breed: Large White | Sex: unknown)
	lung (BioProject: PRJNA311523 | Breed: Meishan | Sex: unknown)
	lung (BioProject: PRJNA311523 | Breed: Pietrain | Sex: unknown)
	tonsil (BioProject: PRJEB19386 | Breed: Duroc | Sex: male)
	spleen (BioProject: PRJNA311523 | Breed: Bamei | Sex: unknown)
	spleen (BioProject: PRJNA311523 | Breed: Berkshire | Sex: unknown)
	spleen (BioProject: PRJNA311523 | Breed: Hampshire | Sex: unknown)
	spleen (BioProject: PRJNA311523 | Breed: Jinhua | Sex: unknown)
	spleen (BioProject: PRJNA311523 | Breed: Landrace | Sex: unknown)
	spleen (BioProject: PRJNA311523 | Breed: Large White | Sex: unknown)
	spleen (BioProject: PRJNA311523 | Breed: Meishan | Sex: unknown)
	spleen (BioProject: PRJNA311523 | Breed: Pietrain | Sex: unknown)
	spleen (BioProject: PRJNA311523 | Breed: Rongchang | Sex: unknown)
	spleen (BioProject: PRJNA311523 | Breed: Tibetan wild boar | Sex: unknown)
	spleen (BioProject: PRJEB19386 | Breed: Duroc | Sex: female)
	spleen (BioProject: PRJNA297855 | Breed: Guizhou mini-pigs | Sex: unknown)
	mesenteric lymph node (BioProject: PRJEB19386 | Breed: Duroc | Sex: female)
	mesenteric lymph node (BioProject: PRJEB19386 | Breed: Duroc | Sex: male)
	fetal thymus (BioProject: PRJNA290579 | Breed: unknown | Sex: female)
	fetal thymus (BioProject: PRJNA290579 | Breed: unknown | Sex: unknown)
	alveolar macrophage (BioProject: PRJEB19386 | Breed: Duroc | Sex: female)
	alveolar macrophage (BioProject: PRJEB19386 | Breed: Duroc | Sex: male)
	BMDMs + 0hr LPS (BioProject: PRJEB23119 | Breed: Duroc | Sex: unknown)
	BMDMs + 7hr LPS (BioProject: PRJEB23119 | Breed: Duroc | Sex: unknown)
	epididymis (BioProject: PRJEB19386 | Breed: Duroc | Sex: male)
	penis (BioProject: PRJEB19386 | Breed: Duroc | Sex: male)
	testis (BioProject: PRJNA297855 | Breed: Guizhou mini-pigs | Sex: male)
	testis (BioProject: PRJNA451072 | Breed: unknown | Sex: male)
	chorion regions of the pig term placenta (BioProject: PRJNA305976 | Breed: Diannan small-ear pig | Sex: pooled male and female)
	endometrium of pregnancy (BioProject: PRJNA297678 | Breed: unknown | Sex: female)
	uterine endometrium (BioProject: PRJNA290579 | Breed: unknown | Sex: female)
	uterine endometrium (BioProject: PRJNA290579 | Breed: unknown | Sex: unknown)
	uterus (BioProject: PRJEB19386 | Breed: Duroc | Sex: female)
	uterus (BioProject: PRJNA293935 | Breed: Crossbred (Landrace, Yorkshire, Duroc, Hampshire) | Sex: female)
	ovary (BioProject: PRJNA297376 | Breed: Large White | Sex: female)
	ovary (BioProject: PRJNA297376 | Breed: Meishan | Sex: female)
	ovary (BioProject: PRJNA297855 | Breed: Guizhou mini-pigs | Sex: female)
	ovary (BioProject: PRJNA311523 | Breed: Bamei | Sex: female)
	ovary (BioProject: PRJNA311523 | Breed: Berkshire | Sex: female)
	ovary (BioProject: PRJNA311523 | Breed: Hampshire | Sex: unknown)
	ovary (BioProject: PRJNA311523 | Breed: Jinhua | Sex: female)
	ovary (BioProject: PRJNA311523 | Breed: Landrace | Sex: female)
	ovary (BioProject: PRJNA311523 | Breed: Large White | Sex: female)
	ovary (BioProject: PRJNA311523 | Breed: Meishan | Sex: female)
	ovary (BioProject: PRJNA311523 | Breed: Pietrain | Sex: female)
	ovary (BioProject: PRJNA311523 | Breed: Rongchang | Sex: unknown)
	oocyte (BioProject: PRJNA237914 | Breed: unknown | Sex: female)
	embryo (BioProject: PRJNA255281 | Breed: Erhualian and Shaziling | Sex: not collected)
	inner cell mass from day 7-8 embryos (BioProject: PRJNA358728 | Breed: unknown | Sex: unknown)
	induced pluripotent stem cells (iPSCs) (BioProject: PRJNA344493 | Breed: Small Xiang Pig | Sex: unknown)
	induced pluripotent stem cells (iPSCs) (BioProject: PRJNA358728 | Breed: unknown | Sex: unknown)
	primordia of developing teeth (BioProject: PRJNA316011 | Breed: miniature pig | Sex: unknown)
	stem cells (BioProject: PRJDB5113 | Breed: unknown | Sex: female)
	mesenchymal stromal/stem cells (BioProject: PRJNA347624 | Breed: unknown | Sex: unknown)
	extracellular vesicles (BioProject: PRJNA347624 | Breed: unknown | Sex: unknown)
	fibroblasts (BioProject: PRJNA344493 | Breed: Small Xiang Pig | Sex: unknown)
	fibroblasts (BioProject: PRJNA358728 | Breed: unknown | Sex: unknown)
	somatic cells (BioProject: PRJDB5113 | Breed: unknown | Sex: unknown)
	peripheral blood (BioProject: PRJNA313448 | Breed: unknown | Sex: female)
	peripheral blood (BioProject: PRJNA313448 | Breed: unknown | Sex: male)
	mixture of multiple tissues (BioProject: PRJNA297855 | Breed: multiple breeds | Sex: unknown)
	mixture of multiple tissues (BioProject: PRJNA311523 | Breed: Bamei | Sex: unknown)
	mixture of multiple tissues (BioProject: PRJNA311523 | Breed: Berkshire | Sex: unknown)
	mixture of multiple tissues (BioProject: PRJNA311523 | Breed: Hampshire | Sex: unknown)
	mixture of multiple tissues (BioProject: PRJNA311523 | Breed: Jinhua | Sex: unknown)
	mixture of multiple tissues (BioProject: PRJNA311523 | Breed: Landrace | Sex: unknown)
	mixture of multiple tissues (BioProject: PRJNA311523 | Breed: Large White | Sex: unknown)
	mixture of multiple tissues (BioProject: PRJNA311523 | Breed: Meishan | Sex: unknown)
	mixture of multiple tissues (BioProject: PRJNA311523 | Breed: Pietrain | Sex: unknown)
	mixture of multiple tissues (BioProject: PRJNA311523 | Breed: Rongchang | Sex: unknown)

## Sheet: Cluster profiles and gene lists
Supplementary Table S2
Network analysis of the pig transcriptional atlas
Cluster profiles and gene lists
Name	Ensembl gene ID	Transcript IDs	Location (chr:start-end:strand)	Description	MCL_2.2_6
AASDH	ENSSSCG00000027403	ENSSSCT00000024804, ENSSSCT00000038551, ENSSSCT00000040399, ENSSSCT00000051274, ENSSSCT00000053182, ENSSSCT00000064956, XM_021101363, XM_021101365, XM_021101366, XM_021101367, XM_021101368, XM_021101369, XM_021101370, XM_021101371, XM_021101372	8:55606144-55647217:-1	aminoadipate-semialdehyde dehydrogenase	Cluster0001
ABCA5	ENSSSCG00000017255	ENSSSCT00000018784, ENSSSCT00000033236, ENSSSCT00000046270, XM_021068102, XM_021068103, XM_021068105, XM_021068106, XM_021068108, XM_021068109, XM_021068110, XM_021068111, XM_021068112, XM_021068113	12:11018687-11152913:+1	ATP binding cassette subfamily A member 5	Cluster0001
ABHD1	ENSSSCG00000008554	ENSSSCT00000009359, XM_005662672, XM_005662673, XM_021087704, XM_021087705	3:111991257-112002148:-1	abhydrolase domain containing 1	Cluster0001
ABL2	ENSSSCG00000024674	ENSSSCT00000027500, ENSSSCT00000038371, ENSSSCT00000047288, ENSSSCT00000052053, ENSSSCT00000054313, XM_003357551, XM_003482730, XM_003482731, XM_003482732, XM_005667790, XM_005667791, XM_005667792	9:120894825-120985119:-1	ABL proto-oncogene 2, non-receptor tyrosine kinase	Cluster0001
ACAP2	ENSSSCG00000031147	ENSSSCT00000037703, ENSSSCT00000037839, ENSSSCT00000047910, ENSSSCT00000048801, ENSSSCT00000054180, ENSSSCT00000055236, ENSSSCT00000065924, XM_021070077, XM_021070078, XM_021070079, XM_021070080, XM_021070081, XM_021070082, XM_021070083, XM_021070084	13:132273877-132431933:-1	ArfGAP with coiled-coil, ankyrin repeat and PH domains 2	Cluster0001
ACSM5	ENSSSCG00000026453	ENSSSCT00000027749, ENSSSCT00000041222, XM_003124563, XM_005662100, XM_005662101, XM_021086523	3:25390279-25422556:-1	acyl-CoA synthetase medium-chain family member 5	Cluster0001
ACTR6	ENSSSCG00000025682	ENSSSCT00000000963, XM_003355672, XM_005664212, XM_013998037	5:83908883-83929081:-1	ARP6 actin related protein 6 homolog	Cluster0001
ACVR2A	ENSSSCG00000015669	ENSSSCT00000017067, ENSSSCT00000046920	15:4173797-4259962:-1	activin A receptor type 2A	Cluster0001
ADAL	ENSSSCG00000004710	ENSSSCT00000005202, ENSSSCT00000049753, XM_005659689, XM_013993096, XM_013993097, XM_013993098, XM_013993099	1:128089963-128125932:-1	adenosine deaminase like	Cluster0001
ADAM10	ENSSSCG00000004595	ENSSSCT00000005076, ENSSSCT00000032619	1:113289084-113412543:+1	ADAM metallopeptidase domain 10	Cluster0001
ADAMTS6	ENSSSCG00000016943	ENSSSCT00000018451, ENSSSCT00000040629, ENSSSCT00000058489, XM_021076778	16:43702520-44011065:-1	ADAM metallopeptidase with thrombospondin type 1 motif 6	Cluster0001
ADD3	ENSSSCG00000010621	ENSSSCT00000011617, ENSSSCT00000037328, ENSSSCT00000040025, ENSSSCT00000043324, ENSSSCT00000054427, ENSSSCT00000059341, ENSSSCT00000060301, XM_001924738, XM_001924829, XM_003359365, XM_005671448, XM_013983720, XM_021073191, XM_021073194, XM_021073195, XM_021073196	14:120451095-120586072:+1	adducin 3	Cluster0001
ADGB	.	XM_013992506, XM_021072116	.	androglobin	Cluster0001
ADPRM	ENSSSCG00000018009	ENSSSCT00000019603, XM_005669245, XM_021066273, XM_021066275, XM_021066276, XM_021066277	12:55430702-55436067:+1	ADP-ribose/CDP-alcohol diphosphatase, manganese dependent	Cluster0001
AEBP2	ENSSSCG00000000587	ENSSSCT00000000632, ENSSSCT00000037031, ENSSSCT00000040914, XM_003126446, XM_021092257	5:53441484-53691547:-1	AE binding protein 2	Cluster0001
AFF4	ENSSSCG00000014291	ENSSSCT00000015614, ENSSSCT00000025744, ENSSSCT00000045065, ENSSSCT00000062227, XM_003123929, XM_021084747, XM_021084749, XM_021084750, XM_021084751	2:135197775-135283923:-1	AF4/FMR2 family member 4	Cluster0001
AFG1L	ENSSSCG00000040199	ENSSSCT00000022746, ENSSSCT00000046117, ENSSSCT00000056646, XM_021090790	1:74367425-74591853:+1	AFG1 like ATPase	Cluster0001
AGBL1	ENSSSCG00000036551	ENSSSCT00000038676, ENSSSCT00000059905, ENSSSCT00000060385, ENSSSCT00000062307, XM_021062610	1:192722847-193534417:-1	ATP/GTP binding protein like 1	Cluster0001
AGBL3	ENSSSCG00000016529	ENSSSCT00000017997, XM_021079175	18:14164327-14247877:-1	ATP/GTP binding protein like 3	Cluster0001
AGFG1	ENSSSCG00000016248	ENSSSCT00000017692, ENSSSCT00000038663, ENSSSCT00000058789, ENSSSCT00000065375, XM_021075860, XM_021075862, XM_021075863, XM_021075864, XM_021075865, XM_021075866, XM_021075867, XM_021075868, XM_021075869, XM_021075870, XM_021075871, XM_021075872	15:128898265-128975515:+1	ArfGAP with FG repeats 1	Cluster0001
AGGF1	.	XM_003123715	.	angiogenic factor with G-patch and FHA domains 1	Cluster0001
AGO3	ENSSSCG00000003630	ENSSSCT00000004025, ENSSSCT00000004026, ENSSSCT00000004027, ENSSSCT00000030097, ENSSSCT00000038441, ENSSSCT00000038526, ENSSSCT00000045582, ENSSSCT00000056463, ENSSSCT00000064566, ENSSSCT00000065601, XM_021093288, XM_021093289, XM_021093290, XM_021093291	6:91967494-92212455:+1	argonaute 3, RISC catalytic component	Cluster0001
AHCTF1	ENSSSCG00000010863	ENSSSCT00000011885, ENSSSCT00000039756, ENSSSCT00000047033, XM_021064441, XM_021064442, XM_021064443	10:15041762-15121942:+1	AT-hook containing transcription factor 1	Cluster0001
AHI1	ENSSSCG00000004166	ENSSSCT00000004605, ENSSSCT00000036796, ENSSSCT00000040870, ENSSSCT00000057650, ENSSSCT00000057712, ENSSSCT00000058434, ENSSSCT00000060523, ENSSSCT00000062806, ENSSSCT00000065502, XM_003121183	1:28566397-28762381:+1	Abelson helper integration site 1	Cluster0001
AKAP13	.	XM_021099911, XM_021099912	.	A-kinase anchoring protein 13	Cluster0001
AKAP9	ENSSSCG00000015310	ENSSSCT00000016683, ENSSSCT00000023446, ENSSSCT00000025278, ENSSSCT00000030484, ENSSSCT00000041238, ENSSSCT00000042493, ENSSSCT00000058131, ENSSSCT00000063634, ENSSSCT00000064131, XM_021102178, XM_021102179, XM_021102180, XM_021102181, XM_021102182, XM_021102183, XM_021102184, XM_021102185, XM_021102186, XM_021102187, XM_021102188, XM_021102189, XM_021102190, XM_021102191, XM_021102192, XM_021102…	9:71895563-72054897:+1	A-kinase anchoring protein 9	Cluster0001
ALG11	ENSSSCG00000009381	ENSSSCT00000010279, ENSSSCT00000055298, ENSSSCT00000059390, XM_001927096, XM_005668385, XM_013980485, XM_013980486	11:15855788-15876629:-1	ALG11, alpha-1,2-mannosyltransferase	Cluster0001
ALG6	ENSSSCG00000003815	ENSSSCT00000004222, ENSSSCT00000043270, ENSSSCT00000052712, ENSSSCT00000059178, XM_003127947, XM_013988885, XM_013988886	6:149027978-149113122:-1	ALG6, alpha-1,3-glucosyltransferase	Cluster0001
ALKBH2	ENSSSCG00000009940	ENSSSCT00000010892, XM_003132926, XM_005670740, XM_013982983	14:41760439-41768527:+1	alkB homolog 2, alpha-ketoglutarate dependent dioxygenase	Cluster0001
AMMECR1	ENSSSCG00000037591	ENSSSCT00000050890, ENSSSCT00000066136, XM_003135311	X:90304923-90420253:-1	Alport syndrome, mental retardation, midface hypoplasia and elliptocytosis chromosomal region gene 1	Cluster0001
AMN1	ENSSSCG00000034407	ENSSSCT00000054232, XM_021092084, XM_021092085, XM_021092087, XM_021092088	5:42518642-42567943:+1	antagonist of mitotic exit network 1 homolog	Cluster0001
ANAPC10	.	XM_013978863, XM_013978864, XM_021100318	.	anaphase promoting complex subunit 10	Cluster0001
ANAPC4	ENSSSCG00000025902	ENSSSCT00000027484, ENSSSCT00000046907, ENSSSCT00000052951, XM_021101074, XM_021101075	8:19301472-19343716:+1	anaphase promoting complex subunit 4	Cluster0001
ANGEL2	ENSSSCG00000015588	ENSSSCT00000016981, ENSSSCT00000038645, ENSSSCT00000042646, ENSSSCT00000049420, ENSSSCT00000062807, XM_003130402, XM_003357587, XM_005667848, XM_013979952, XM_013979953, XM_013979955, XM_021063848, XM_021063849	9:130453922-130474918:+1	angel homolog 2	Cluster0001
ANGPTL5	ENSSSCG00000014978	ENSSSCT00000016340, XM_003129804	9:32609135-32627638:-1	angiopoietin like 5	Cluster0001
ANKFY1	ENSSSCG00000017877	ENSSSCT00000019454, ENSSSCT00000043120, ENSSSCT00000051814, ENSSSCT00000063642, XM_021067694	12:50167960-50251790:-1	ankyrin repeat and FYVE domain containing 1	Cluster0001
ANKHD1	ENSSSCG00000014364	ENSSSCT00000015694, ENSSSCT00000047944	2:142166314-142298097:+1	ankyrin repeat and KH domain containing 1	Cluster0001
ANKIB1	ENSSSCG00000015314	ENSSSCT00000016687, ENSSSCT00000055638, XM_003130136, XM_005667593, XM_013979684	9:72079300-72329544:+1	ankyrin repeat and IBR domain containing 1	Cluster0001
ANKMY2	ENSSSCG00000015360	ENSSSCT00000016735, XM_013991184	9:85850647-85887485:-1	ankyrin repeat and MYND domain containing 2	Cluster0001
ANKRD13C	ENSSSCG00000003790	ENSSSCT00000004194, ENSSSCT00000046944, ENSSSCT00000047894, XM_003127927	6:142516120-142618400:+1	ankyrin repeat domain 13C	Cluster0001
ANKRD17	ENSSSCG00000024592	ENSSSCT00000028188, ENSSSCT00000039427, ENSSSCT00000060221, XM_021100379, XM_021100380, XM_021100381, XM_021100382, XM_021100384, XM_021100385, XM_021100386, XM_021100387, XM_021100388, XM_021100389, XM_021100390, XM_021100391, XM_021100392, XM_021100393	8:69361213-69531286:-1	ankyrin repeat domain 17	Cluster0001
ANKRD24	ENSSSCG00000013497	ENSSSCT00000014743, ENSSSCT00000043714, ENSSSCT00000048578, ENSSSCT00000049540, ENSSSCT00000059794, ENSSSCT00000063857, XM_013994770, XM_021084068, XM_021084069, XM_021084070, XM_021084071, XM_021084072, XM_021084073, XM_021084074, XM_021084075, XM_021084076, XM_021084077, XM_021084078, XM_021084079, XM_021084081, XM_021084082, XM_021084083	2:74539688-74564902:-1	ankyrin repeat domain 24	Cluster0001
ANKRD28	ENSSSCG00000011194	ENSSSCT00000012259, ENSSSCT00000040406, ENSSSCT00000043002, ENSSSCT00000043480, ENSSSCT00000062689, XM_013981383, XM_013981385, XM_021068206, XM_021068208, XM_021068209, XM_021068210, XM_021068211, XM_021068212	13:2922860-3136951:-1	ankyrin repeat domain 28	Cluster0001
ANKRD42	ENSSSCG00000014902	ENSSSCT00000016257, ENSSSCT00000044553, ENSSSCT00000050097, ENSSSCT00000056596, ENSSSCT00000064507, XM_013979195, XM_013979196, XM_021062579, XM_021062580, XM_021062581, XM_021062582, XM_021062583, XM_021062584, XM_021062585	9:17334055-17410294:+1	ankyrin repeat domain 42	Cluster0001
ANKRD44	ENSSSCG00000016074	ENSSSCT00000017501, ENSSSCT00000041974, ENSSSCT00000046158, ENSSSCT00000051756, ENSSSCT00000059190, XM_005672043, XM_013984362, XM_013984363, XM_021076232, XM_021076233, XM_021076234, XM_021076236, XM_021076237, XM_021076238	15:100868475-101211230:-1	ankyrin repeat domain 44	Cluster0001
ANXA9	ENSSSCG00000006643	ENSSSCT00000007279, ENSSSCT00000060028, ENSSSCT00000064954, ENSSSCT00000066293, XM_013997160, XM_021088517, XM_021088518, XM_021088519, XM_021088520, XM_021088522, XM_021088523, XM_021088524, XM_021088525, XM_021088526, XM_021088527	4:98221851-98242243:-1	annexin A9	Cluster0001
AP1G1	ENSSSCG00000002740	ENSSSCT00000003036, XM_003126897, XM_021093827	6:14719953-14809756:-1	adaptor related protein complex 1 gamma 1 subunit	Cluster0001
AP3M1	ENSSSCG00000010314	ENSSSCT00000011291, ENSSSCT00000036753, ENSSSCT00000040274, ENSSSCT00000054294, XM_005671062, XM_013983315	14:76809471-76835678:-1	adaptor related protein complex 3 mu 1 subunit	Cluster0001
AP4S1	ENSSSCG00000001972	ENSSSCT00000002205, XM_021098034, XM_021098036, XM_021098037	7:68426259-68447491:-1	adaptor related protein complex 4 sigma 1 subunit	Cluster0001
AP5M1	ENSSSCG00000005065	ENSSSCT00000005582, ENSSSCT00000037259, ENSSSCT00000052868	1:186430248-186459932:+1	adaptor related protein complex 5 subunit mu 1	Cluster0001
APAF1	ENSSSCG00000000884	ENSSSCT00000000968, ENSSSCT00000028858, ENSSSCT00000033603, ENSSSCT00000064350, XM_003481742, XM_013998050, XM_021093025	5:85166460-85258707:-1	apoptotic peptidase activating factor 1	Cluster0001
API5	ENSSSCG00000013285	ENSSSCT00000014509, ENSSSCT00000063970, XM_003122856, XM_005660984	2:18962271-18994240:-1	apoptosis inhibitor 5	Cluster0001
APPBP2	ENSSSCG00000017678	ENSSSCT00000019242, ENSSSCT00000054052, XM_013981135	12:37613770-37678712:+1	amyloid beta precursor protein binding protein 2	Cluster0001
APPL1	ENSSSCG00000032357	ENSSSCT00000047890, ENSSSCT00000057301, ENSSSCT00000060109, ENSSSCT00000060859	13:39088704-39129433:+1	adaptor protein, phosphotyrosine interacting with PH domain and leucine zipper 1	Cluster0001
AQR	ENSSSCG00000004802	ENSSSCT00000005301, ENSSSCT00000040622, XM_021098271, XM_021098273	1:136121111-136236356:+1	aquarius intron-binding spliceosomal factor	Cluster0001
ARFGEF1	ENSSSCG00000006201	ENSSSCT00000006796, ENSSSCT00000035957, XM_001928010	4:67465517-67613622:+1	ADP ribosylation factor guanine nucleotide exchange factor 1	Cluster0001
ARFGEF2	ENSSSCG00000007460	ENSSSCT00000008164, XM_003483981, XM_005654245	17:50631850-50732243:+1	ADP ribosylation factor guanine nucleotide exchange factor 2	Cluster0001
ARHGAP12	ENSSSCG00000011026	ENSSSCT00000012068, ENSSSCT00000041109, ENSSSCT00000042987, ENSSSCT00000045314, ENSSSCT00000045467, ENSSSCT00000050368, ENSSSCT00000056090, ENSSSCT00000062860, ENSSSCT00000066336, XM_005668094, XM_013980219, XM_013980220, XM_013980221, XM_021064793, XM_021064794, XM_021064795, XM_021064797, XM_021064798, XM_021064800, XM_021064802, XM_021064803, XM_021064804	10:42458052-42577350:-1	Rho GTPase activating protein 12	Cluster0001
ARHGAP42	ENSSSCG00000014976	ENSSSCT00000016338	9:31721350-31997616:+1	Rho GTPase activating protein 42	Cluster0001
ARHGAP5	ENSSSCG00000001966	ENSSSCT00000002199, ENSSSCT00000028957, ENSSSCT00000039111, ENSSSCT00000060419, ENSSSCT00000065462, XM_013978128, XM_021099176, XM_021099177, XM_021099178, XM_021099179, XM_021099182, XM_021099183, XM_021099184	7:67493997-67631449:-1	Rho GTPase activating protein 5	Cluster0001
ARHGEF12	ENSSSCG00000015129	ENSSSCT00000016495, ENSSSCT00000048704, ENSSSCT00000048768, ENSSSCT00000053259, ENSSSCT00000058555, XM_013979482, XM_021062982, XM_021062983, XM_021062984	9:47475134-47621287:+1	Rho guanine nucleotide exchange factor 12	Cluster0001
ARID2	ENSSSCG00000030685	ENSSSCT00000030858, ENSSSCT00000049846, ENSSSCT00000063011, ENSSSCT00000064554, XM_021092987	5:76634700-76799691:+1	AT-rich interaction domain 2	Cluster0001
ARIH1	ENSSSCG00000023188	ENSSSCT00000030450, XM_021099101, XM_021099102, XM_021099103	7:60707489-60824123:-1	ariadne RBR E3 ubiquitin protein ligase 1	Cluster0001
ARL13B	ENSSSCG00000027571	ENSSSCT00000024264, ENSSSCT00000027056, XM_013991457, XM_013991460, XM_021070732, XM_021070733, XM_021070735	13:165828077-165910937:-1	ADP ribosylation factor like GTPase 13B	Cluster0001
ARL14EP	ENSSSCG00000039889	ENSSSCT00000039547, ENSSSCT00000043056, XM_021083232	2:30295066-30311535:-1	ADP ribosylation factor like GTPase 14 effector protein	Cluster0001
ARL5A	ENSSSCG00000031541	ENSSSCT00000038014, ENSSSCT00000047745, ENSSSCT00000059749, XM_021076258	15:467941-498964:+1	ADP ribosylation factor like GTPase 5A	Cluster0001
ARL5B	ENSSSCG00000031456	ENSSSCT00000059248, ENSSSCT00000066395, XM_005668272	10:55675138-55700324:-1	ADP ribosylation factor like GTPase 5B	Cluster0001
ARL6	ENSSSCG00000027278	ENSSSCT00000023112, ENSSSCT00000045020, ENSSSCT00000053845, XM_003358869, XM_013990169, XM_013990170, XM_021070699, XM_021070700	13:162504022-162556089:-1	ADP ribosylation factor like GTPase 6	Cluster0001
ARMC8	ENSSSCG00000036610	ENSSSCT00000026476, ENSSSCT00000036720, ENSSSCT00000036952, ENSSSCT00000052893, XM_021069500	13:78982605-79083809:+1	armadillo repeat containing 8	Cluster0001
ARMH3	ENSSSCG00000010571	ENSSSCT00000011564, ENSSSCT00000040717, ENSSSCT00000050290, ENSSSCT00000066186	14:112877308-113073591:-1	armadillo-like helical domain containing 3	Cluster0001
ARSA	ENSSSCG00000032428	ENSSSCT00000048812	5:107098-112557:+1	arylsulfatase A	Cluster0001
ASCC3	ENSSSCG00000004358	ENSSSCT00000004815, ENSSSCT00000004816, ENSSSCT00000058812, XM_021090356, XM_021090357, XM_021090366	1:67331948-67657114:-1	activating signal cointegrator 1 complex subunit 3	Cluster0001
ASH1L	ENSSSCG00000006508	ENSSSCT00000007128, ENSSSCT00000026228, ENSSSCT00000027588, XM_013997001, XM_021089695, XM_021089696, XM_021089697	4:94298139-94483792:+1	ASH1 like histone lysine methyltransferase	Cluster0001
ASTE1	ENSSSCG00000011182	ENSSSCT00000012245, ENSSSCT00000035248, ENSSSCT00000057686, ENSSSCT00000065559, XM_001925695, XM_021071324, XM_021071325	13:1435709-1455181:+1	asteroid homolog 1 (Drosophila)	Cluster0001
ASXL2	ENSSSCG00000008575	ENSSSCT00000009382, ENSSSCT00000062944, XM_003125333, XM_021087739, XM_021087740	3:113044777-113179913:+1	additional sex combs like 2, transcriptional regulator	Cluster0001
ATAD1	ENSSSCG00000010438	ENSSSCT00000011423, XM_001927977, XM_005671257, XM_013983524, XM_021073106, XM_021073107	14:99812050-99886058:-1	ATPase family, AAA domain containing 1	Cluster0001
ATAD2B	ENSSSCG00000008591	ENSSSCT00000009401, ENSSSCT00000009403, ENSSSCT00000066132, XM_021087780, XM_021087781	3:114722150-114846644:+1	ATPase family, AAA domain containing 2B	Cluster0001
ATE1	ENSSSCG00000010699	ENSSSCT00000011705, ENSSSCT00000039554, ENSSSCT00000042438, ENSSSCT00000052213, ENSSSCT00000065903, XM_003133201, XM_003483566, XM_005671511, XM_005671512, XM_013983810, XM_013983814, XM_013983817, XM_021073564, XM_021073565, XM_021073566, XM_021073568, XM_021073570	14:131381938-131580336:-1	arginyltransferase 1	Cluster0001
ATF7IP	ENSSSCG00000000612	ENSSSCT00000000658, ENSSSCT00000022782, ENSSSCT00000039240, ENSSSCT00000039361, ENSSSCT00000051931, ENSSSCT00000052005, ENSSSCT00000052841, ENSSSCT00000061398, ENSSSCT00000063620, ENSSSCT00000064888, XM_003126462, XM_021092310, XM_021092311, XM_021092313	5:58022733-58150185:-1	activating transcription factor 7 interacting protein	Cluster0001
ATG2B	ENSSSCG00000002502	ENSSSCT00000002780, ENSSSCT00000052844, ENSSSCT00000057140, XM_013978411, XM_021098162, XM_021098163, XM_021098164	7:117486124-117586587:-1	autophagy related 2B	Cluster0001
ATG4C	ENSSSCG00000003816	ENSSSCT00000004223, ENSSSCT00000050413, XM_013988887	6:149608220-149691946:-1	autophagy related 4C cysteine peptidase	Cluster0001
ATG5	ENSSSCG00000004370	ENSSSCT00000004831, ENSSSCT00000025776, ENSSSCT00000049307, ENSSSCT00000065385, XM_021090470, XM_021090478, XM_021090485, XM_021090491, XM_021090498	1:72345004-72520448:-1	autophagy related 5	Cluster0001
ATM	ENSSSCG00000025606	ENSSSCT00000016371, ENSSSCT00000028051, ENSSSCT00000054007, ENSSSCT00000055430, ENSSSCT00000063833, ENSSSCT00000065931, XM_021101922, XM_021101923, XM_021101924, XM_021101925, XM_021101926, XM_021101927, XM_021101928, XM_021101929, XM_021101931, XM_021101932, XM_021101933, XM_021101934, XM_021101935, XM_021101936	9:36620587-36759552:+1	ATM serine/threonine kinase	Cluster0001
ATP11B	ENSSSCG00000011772	ENSSSCT00000012884, ENSSSCT00000038416, ENSSSCT00000050824, ENSSSCT00000053777, ENSSSCT00000062766, ENSSSCT00000065991, XM_021069865, XM_021069866, XM_021069868, XM_021069869, XM_021069870, XM_021069871, XM_021069872, XM_021069873, XM_021069874, XM_021069875, XM_021069876, XM_021069877, XM_021069878, XM_021069880, XM_021069882, XM_021069883, XM_021069884	13:120727597-120873932:+1	ATPase phospholipid transporting 11B (putative)	Cluster0001
ATP11C	ENSSSCG00000012713	ENSSSCT00000013899, ENSSSCT00000035711, ENSSSCT00000036522, ENSSSCT00000038310, ENSSSCT00000044077, ENSSSCT00000046314, ENSSSCT00000049594, ENSSSCT00000053041, ENSSSCT00000063255, ENSSSCT00000065618, XM_021080194, XM_021080196, XM_021080197, XM_021080198, XM_021080199, XM_021080201, XM_021080202	X:114394433-114574071:-1	ATPase phospholipid transporting 11C	Cluster0001
ATP6V0A2	ENSSSCG00000009766	ENSSSCT00000010708, XM_013982778, XM_021072229	14:29250404-29297695:-1	ATPase H+ transporting V0 subunit a2	Cluster0001
ATP7A	ENSSSCG00000012437	ENSSSCT00000013601, XM_013990937, XM_013990938	X:61973012-62110048:+1	ATPase copper transporting alpha	Cluster0001
ATR	ENSSSCG00000011679	ENSSSCT00000012786, XM_021069571	13:83175883-83289831:-1	ATR serine/threonine kinase	Cluster0001
ATXN3L	ENSSSCG00000002446	ENSSSCT00000002716	7:113608781-113645844:-1	ataxin 3	Cluster0001
AVL9	ENSSSCG00000023445	ENSSSCT00000029825, ENSSSCT00000053149, ENSSSCT00000055803, ENSSSCT00000060396, XM_021079002, XM_021079003	18:40656660-40739172:-1	AVL9 cell migration associated	Cluster0001
AZI2	ENSSSCG00000028258	ENSSSCT00000030647, ENSSSCT00000053342, XM_003358349, XM_021071480, XM_021071481, XM_021071482	13:14754011-14785502:-1	5-azacytidine induced 2	Cluster0001
AZIN1	ENSSSCG00000023873	ENSSSCT00000024569, XM_021088634, XM_021088635, XM_021088636, XM_021088637, XM_021088638	4:34242981-34254926:+1	antizyme inhibitor 1	Cluster0001
B4GALT7	ENSSSCG00000014035	ENSSSCT00000015331, ENSSSCT00000047565	2:80346568-80359959:-1	beta-1,4-galactosyltransferase 7	Cluster0001
BAG4	ENSSSCG00000034468	ENSSSCT00000037183, XM_013984080	15:48300132-48348525:-1	BCL2 associated athanogene 4	Cluster0001
BAZ1B	ENSSSCG00000027342	ENSSSCT00000030732, ENSSSCT00000050875, XM_003354497, XM_005661976, XM_021086315	3:10761474-10844544:-1	bromodomain adjacent to zinc finger domain 1B	Cluster0001
BAZ2B	ENSSSCG00000015882	ENSSSCT00000017293, ENSSSCT00000017294, ENSSSCT00000024565, ENSSSCT00000044120, XM_021074758	15:66255010-66681077:-1	bromodomain adjacent to zinc finger domain 2B	Cluster0001
BBS9	ENSSSCG00000024754	ENSSSCT00000018146, ENSSSCT00000031056, ENSSSCT00000043707, XM_021079327, XM_021079328, XM_021079330, XM_021079331, XM_021079332, XM_021079333, XM_021079334, XM_021079335, XM_021079336, XM_021079337, XM_021079338, XM_021079339	18:39950745-40394356:-1	Bardet-Biedl syndrome 9	Cluster0001
BBX	ENSSSCG00000011943	ENSSSCT00000013069, ENSSSCT00000024394, ENSSSCT00000037798, ENSSSCT00000043746, ENSSSCT00000049495, ENSSSCT00000053393, ENSSSCT00000053558, ENSSSCT00000061993, XM_021070457, XM_021070458, XM_021070459, XM_021070460, XM_021070461, XM_021070462, XM_021070463, XM_021070464, XM_021070466, XM_021070467, XM_021070468, XM_021070469, XM_021070470, XM_021070471, XM_021070472, XM_021070473, XM_021070474, X…	13:151722098-152005232:-1	BBX, HMG-box containing	Cluster0001
BCAS3	ENSSSCG00000017676	ENSSSCT00000019240, ENSSSCT00000036941, ENSSSCT00000048048, ENSSSCT00000058151, ENSSSCT00000060823, XM_021068154, XM_021068155, XM_021068156, XM_021068157, XM_021068158, XM_021068159, XM_021068160, XM_021068161, XM_021068162, XM_021068164, XM_021068165, XM_021068166	12:36920487-37475545:-1	BCAS3, microtubule associated cell migration factor	Cluster0001
BCDIN3D	ENSSSCG00000040144	ENSSSCT00000055995, ENSSSCT00000064868, XM_005663848	5:15750504-15761536:-1	BCDIN3 domain containing RNA methyltransferase	Cluster0001
BCLAF1	ENSSSCG00000004163	ENSSSCT00000004602, ENSSSCT00000037556, ENSSSCT00000043883, ENSSSCT00000048439, ENSSSCT00000058049, ENSSSCT00000060649, XM_005654382, XM_005654383, XM_005654384	1:27872183-27919899:+1	BCL2 associated transcription factor 1	Cluster0001
BCLAF3	ENSSSCG00000023334	ENSSSCT00000029969, ENSSSCT00000036170, ENSSSCT00000049332, ENSSSCT00000053769	X:16249443-16312407:-1	BCLAF1 and THRAP3 family member 3	Cluster0001
BDP1	ENSSSCG00000016968	ENSSSCT00000018477, ENSSSCT00000039274, ENSSSCT00000048269, XM_005672527	16:47801293-47907221:+1	B double prime 1, subunit of RNA polymerase III transcription initiation factor IIIB	Cluster0001
BIRC6	ENSSSCG00000008513	ENSSSCT00000009316, XM_021087656	3:107013931-107269370:-1	baculoviral IAP repeat containing 6	Cluster0001
BIVM	.	XM_021065131, XM_021065132, XM_021065133, XM_021065134, XM_021065135	.	basic, immunoglobulin-like variable motif containing	Cluster0001
BLOC1S6	ENSSSCG00000037384	ENSSSCT00000029227, ENSSSCT00000047121	1:126165986-126185033:-1	biogenesis of lysosomal organelles complex 1 subunit 6	Cluster0001
BMT2	ENSSSCG00000021466	ENSSSCT00000032557, ENSSSCT00000038521	18:32798061-32900764:+1	base methyltransferase of 25S rRNA 2 homolog	Cluster0001
BMX	ENSSSCG00000012137	ENSSSCT00000013276, ENSSSCT00000032899, XM_005673449, XM_021080134, XM_021080135, XM_021080136	X:12044490-12096638:+1	BMX non-receptor tyrosine kinase	Cluster0001
BNIP2	ENSSSCG00000004582	ENSSSCT00000005061, ENSSSCT00000040315, ENSSSCT00000065435, XM_003121469	1:112344060-112369245:+1	BCL2 interacting protein 2	Cluster0001
BPTF	ENSSSCG00000033528	ENSSSCT00000039908, ENSSSCT00000043587, ENSSSCT00000046760, ENSSSCT00000062661, XM_021068118	12:14112643-14255404:+1	bromodomain PHD finger transcription factor	Cluster0001
BRAF	ENSSSCG00000016494	ENSSSCT00000017958, ENSSSCT00000036816, ENSSSCT00000040418, ENSSSCT00000046523, ENSSSCT00000053983, ENSSSCT00000055445, XM_005654267, XM_021078583, XM_021078585, XM_021078586, XM_021078587, XM_021078588	18:8957353-9132553:+1	B-Raf proto-oncogene, serine/threonine kinase	Cluster0001
BRWD3	ENSSSCG00000025156	ENSSSCT00000031239, ENSSSCT00000033174, ENSSSCT00000040534, ENSSSCT00000045006, ENSSSCT00000058949, ENSSSCT00000062528, XM_021080763	X:64237200-64403851:-1	bromodomain and WD repeat domain containing 3	Cluster0001
BTAF1	ENSSSCG00000010467	ENSSSCT00000011455, ENSSSCT00000027675, ENSSSCT00000029375, ENSSSCT00000047194, ENSSSCT00000065436, XM_003359291	14:103530636-103641746:+1	B-TFIID TATA-box binding protein associated factor 1	Cluster0001
BTBD7	ENSSSCG00000002461	ENSSSCT00000002732, XM_013989219	7:114619396-114707051:-1	BTB domain containing 7	Cluster0001
C10orf82	ENSSSCG00000034237	ENSSSCT00000045513	14:126848155-126858306:-1	chromosome 10 open reading frame 82	Cluster0001
C11orf65	ENSSSCG00000015008	ENSSSCT00000016372, ENSSSCT00000039567, ENSSSCT00000063890	9:36775101-36823983:-1	chromosome 9 C11orf65 homolog	Cluster0001
C11orf97	ENSSSCG00000014957	ENSSSCT00000016318, ENSSSCT00000054300	9:26648086-26669961:+1	chromosome 9 C11orf97 homolog	Cluster0001
C12orf4	ENSSSCG00000000723	ENSSSCT00000000786, ENSSSCT00000063252	5:65892910-65939569:+1	chromosome 5 C12orf4 homolog	Cluster0001
C12orf45	ENSSSCG00000027792	ENSSSCT00000028485, ENSSSCT00000037000, ENSSSCT00000065347	5:79545430-79575998:-1	chromosome 5 C12orf45 homolog	Cluster0001
C12orf49	ENSSSCG00000035873	ENSSSCT00000049639	14:35705924-35727018:+1	chromosome 14 C12orf49 homolog	Cluster0001
C13H3orf35	.	XM_021071657	.	chromosome 13 C3orf35 homolog	Cluster0001
C14orf28	ENSSSCG00000030679	ENSSSCT00000005509	1:175145913-175156595:+1	chromosome 1 C14orf28 homolog	Cluster0001
C16H5orf22	.	XM_003359737	.	chromosome 16 C5orf22 homolog	Cluster0001
C16H5orf34	.	XM_021077011	.	chromosome 16 C5orf34 homolog	Cluster0001
C16H5orf42	.	XM_005672422	.	chromosome 16 C5orf42 homolog	Cluster0001
C16orf89	ENSSSCG00000025072	ENSSSCT00000031769, ENSSSCT00000046949	3:37346626-37367380:+1	chromosome 3 C16orf89 homolog	Cluster0001
C16orf91	ENSSSCG00000038882	ENSSSCT00000061309	3:40439995-40444934:+1	chromosome 3 C16orf91 homolog	Cluster0001
C17H20orf194	.	XM_021078124, XM_021078125, XM_021078126	.	chromosome 17 C20orf194 homolog	Cluster0001
C17orf75	ENSSSCG00000017733	ENSSSCT00000019300, ENSSSCT00000058186	12:42611547-42627053:+1	chromosome 12 C17orf75 homolog	Cluster0001
C18orf54	ENSSSCG00000004531	ENSSSCT00000005005, ENSSSCT00000040280, ENSSSCT00000043978, ENSSSCT00000054889	1:103861549-103887284:+1	chromosome 1 C18orf54 homolog	Cluster0001
C1orf131	ENSSSCG00000010176	ENSSSCT00000011142	14:59239854-59262187:+1	chromosome 14 C1orf131 homolog	Cluster0001
C1orf194	ENSSSCG00000033292	ENSSSCT00000056295, ENSSSCT00000058691	4:110954921-110965148:+1	chromosome 4 C1orf194 homolog	Cluster0001
C1orf35	ENSSSCG00000013991	ENSSSCT00000015282	2:51236996-51241274:-1	chromosome 2 C1orf35 homolog	Cluster0001
C2CD5	ENSSSCG00000000570	ENSSSCT00000000613, ENSSSCT00000038149, ENSSSCT00000038815, ENSSSCT00000054563, ENSSSCT00000058783, ENSSSCT00000061175, ENSSSCT00000064561, XM_021092212, XM_021092213, XM_021092215, XM_021092216, XM_021092217, XM_021092218, XM_021092219, XM_021092221, XM_021092222, XM_021092223, XM_021092224, XM_021092225, XM_021092226, XM_021092227, XM_021092228, XM_021092229, XM_021092231, XM_021092232	5:51040519-51132282:+1	C2 calcium dependent domain containing 5	Cluster0001
C2orf15	ENSSSCG00000038761	ENSSSCT00000049827, ENSSSCT00000065733	3:55186961-55198128:-1	chromosome 2 open reading frame 15	Cluster0001
C2orf69	ENSSSCG00000016086	ENSSSCT00000017514	15:103542938-103558166:+1	chromosome 2 open reading frame 69	Cluster0001
C2orf73	ENSSSCG00000008410	ENSSSCT00000009209, ENSSSCT00000045131	3:86885459-86921986:-1	chromosome 3 C2orf73 homolog	Cluster0001
C2orf76	ENSSSCG00000015718	ENSSSCT00000017118, ENSSSCT00000057987	15:24835544-24867827:-1	chromosome 15 C2orf76 homolog	Cluster0001
C2orf80	ENSSSCG00000032040	ENSSSCT00000044044	15:111276760-111304249:-1	chromosome 15 C2orf80 homolog	Cluster0001
C3orf38	ENSSSCG00000034645	ENSSSCT00000039968, ENSSSCT00000058542, ENSSSCT00000059044	13:167790021-167803758:-1	chromosome 13 C3orf38 homolog	Cluster0001
C4H8orf88	.	XM_021089133, XM_021089134	.	chromosome 4 C8orf88 homolog	Cluster0001
C4orf47	ENSSSCG00000015794	ENSSSCT00000017197, ENSSSCT00000061654	15:46470765-46490010:+1	chromosome 15 C4orf47 homolog	Cluster0001
C5orf24	ENSSSCG00000034954	ENSSSCT00000039433, ENSSSCT00000047815	2:137017027-137049441:+1	chromosome 2 C5orf24 homolog	Cluster0001
C5orf30	ENSSSCG00000038779	ENSSSCT00000025743, ENSSSCT00000043971, ENSSSCT00000045725, ENSSSCT00000045933, ENSSSCT00000059613, ENSSSCT00000065499	2:108733368-108753275:+1	chromosome 2 C5orf30 homolog	Cluster0001
C5orf51	ENSSSCG00000040855	ENSSSCT00000051159, ENSSSCT00000051201	16:26681712-26702537:+1	chromosome 16 C5orf51 homolog	Cluster0001
C6H16orf74	.	XM_013998143	.	chromosome 6 C16orf74 homolog	Cluster0001
C6orf222	ENSSSCG00000001560	ENSSSCT00000001739, ENSSSCT00000037378, ENSSSCT00000058810	7:32032485-32054703:-1	chromosome 7 C6orf222 homolog	Cluster0001
C7orf57	ENSSSCG00000033266	ENSSSCT00000043583	18:48449219-48473246:-1	chromosome 18 C7orf57 homolog	Cluster0001
C8H4orf36	.	XM_013979046, XM_013979047	.	chromosome 8 C4orf36 homolog	Cluster0001
C8orf34	ENSSSCG00000035887	ENSSSCT00000006793, ENSSSCT00000025843, ENSSSCT00000037361, ENSSSCT00000039627, ENSSSCT00000041171, ENSSSCT00000042892, ENSSSCT00000044006, ENSSSCT00000047463, ENSSSCT00000055687	4:66118883-66637258:-1	chromosome 4 C8orf34 homolog	Cluster0001
C8orf37	ENSSSCG00000034398	ENSSSCT00000040863	4:41372785-41397071:+1	chromosome 4 C8orf37 homolog	Cluster0001
C8orf48	ENSSSCG00000006972	ENSSSCT00000007637	17:1610301-1634640:+1	chromosome 8 open reading frame 48	Cluster0001
C8orf88	ENSSSCG00000040562	ENSSSCT00000038259, ENSSSCT00000058205	4:45923213-46092151:+1	chromosome 4 C8orf88 homolog	Cluster0001
C9H1orf27	.	XM_005653747	.	chromosome 9 C1orf27 homolog	Cluster0001
C9orf135	ENSSSCG00000035668	ENSSSCT00000039324	1:223153116-223247892:+1	chromosome 1 C9orf135 homolog	Cluster0001
C9orf72	ENSSSCG00000011010	ENSSSCT00000012052, ENSSSCT00000047297, ENSSSCT00000051717, ENSSSCT00000052740	10:38389216-38415901:+1	chromosome 10 C9orf72 homolog	Cluster0001
C9orf85	ENSSSCG00000031105	ENSSSCT00000050062	1:225193703-225258921:+1	chromosome 1 C9orf85 homolog	Cluster0001
CAAP1	ENSSSCG00000005127	ENSSSCT00000005652, XM_003121874, XM_021062724	1:196229391-196276252:+1	caspase activity and apoptosis inhibitor 1	Cluster0001
CAB39	ENSSSCG00000016266	ENSSSCT00000017712, ENSSSCT00000060071, XM_021075733, XM_021075734	15:131492570-131585105:+1	calcium binding protein 39	Cluster0001
CACUL1	ENSSSCG00000038222	ENSSSCT00000036843, XM_003483565	14:128682657-128749062:-1	CDK2 associated cullin domain 1	Cluster0001
CAMLG	ENSSSCG00000038955	ENSSSCT00000037783	2:136957733-136972341:+1	calcium modulating ligand	Cluster0001
CAND1	ENSSSCG00000028869	ENSSSCT00000000517, ENSSSCT00000001046, XM_003126362	5:31657501-31699839:+1	cullin associated and neddylation dissociated 1	Cluster0001
CAPN7	ENSSSCG00000030697	ENSSSCT00000022738	13:2452183-2504905:+1	calpain 7	Cluster0001
CARF	ENSSSCG00000016117	ENSSSCT00000017548, ENSSSCT00000038096, ENSSSCT00000049286, ENSSSCT00000050182, XM_021075544, XM_021075545, XM_021075546, XM_021075547, XM_021075548, XM_021075549, XM_021075550, XM_021075552, XM_021075553, XM_021075556, XM_021075557, XM_021075558	15:106410155-106466801:+1	calcium responsive transcription factor	Cluster0001
CASC1	ENSSSCG00000040550	ENSSSCT00000058759, ENSSSCT00000062474, ENSSSCT00000065379, XM_021092188, XM_021092189, XM_021092193, XM_021092194, XM_021092195, XM_021092196, XM_021092197, XM_021092198, XM_021092200, XM_021092201	5:48555688-48651365:+1	cancer susceptibility 1	Cluster0001
CASC4	ENSSSCG00000023996	ENSSSCT00000005183, ENSSSCT00000025826, XM_013993061, XM_021096541	1:127130089-127238624:-1	cancer susceptibility 4	Cluster0001
CATIP	ENSSSCG00000016187	ENSSSCT00000017627	15:120419473-120429632:+1	ciliogenesis associated TTC17 interacting protein	Cluster0001
CBFB	ENSSSCG00000033811	ENSSSCT00000051311, ENSSSCT00000054949, XM_021094052, XM_021094053, XM_021094054, XM_021094057, XM_021094058	6:27684323-27750852:+1	core-binding factor beta subunit	Cluster0001
CBLB	ENSSSCG00000022486	ENSSSCT00000023448, ENSSSCT00000031442, ENSSSCT00000052720, ENSSSCT00000058581, XM_013982478, XM_013982479, XM_021070489, XM_021070492, XM_021070493, XM_021070494, XM_021070495, XM_021070496	13:153479925-153700111:+1	Cbl proto-oncogene B	Cluster0001
CC2D2A	ENSSSCG00000008738	ENSSSCT00000009559, XM_003128860	8:10800525-10898034:+1	coiled-coil and C2 domain containing 2A	Cluster0001
CCDC107	ENSSSCG00000005313	ENSSSCT00000005851, XM_005660222, XM_005660223	1:236380141-236383666:+1	coiled-coil domain containing 107	Cluster0001
CCDC122	ENSSSCG00000009426	ENSSSCT00000010330, ENSSSCT00000010331, ENSSSCT00000040221, ENSSSCT00000047699, ENSSSCT00000054317, XM_013980558, XM_013980559, XM_013980561, XM_013980562, XM_021065619, XM_021065620, XM_021065621	11:23159279-23200053:+1	coiled-coil domain containing 122	Cluster0001
CCDC125	ENSSSCG00000016963	ENSSSCT00000018472, ENSSSCT00000018473, ENSSSCT00000030315, XM_005672514, XM_013984840, XM_013984842, XM_013984843, XM_021076889, XM_021076890	16:47442083-47477940:-1	coiled-coil domain containing 125	Cluster0001
CCDC126	ENSSSCG00000029174	ENSSSCT00000028274, ENSSSCT00000037533, XM_003357478, XM_021102513, XM_021102514	9:92372064-92419237:+1	coiled-coil domain containing 126	Cluster0001
CCDC14	ENSSSCG00000025349	ENSSSCT00000029688, ENSSSCT00000040405, XM_021070220, XM_021070221, XM_021070222, XM_021070223, XM_021070224, XM_021070225, XM_021070226, XM_021070227, XM_021070228, XM_021070229, XM_021070230	13:136438962-136493792:+1	coiled-coil domain containing 14	Cluster0001
CCDC18	ENSSSCG00000006897	ENSSSCT00000007552, ENSSSCT00000030921, ENSSSCT00000050342, ENSSSCT00000053970, ENSSSCT00000060895, XM_021090188, XM_021090189, XM_021090190, XM_021090191, XM_021090192, XM_021090193, XM_021090194, XM_021090195, XM_021090199, XM_021090200, XM_021090201, XM_021090202	4:123902320-124008748:-1	coiled-coil domain containing 18	Cluster0001
CCDC191	ENSSSCG00000011913	ENSSSCT00000013036, ENSSSCT00000023697, XM_021070332, XM_021070333, XM_021070334, XM_021070336, XM_021070337, XM_021070338, XM_021070339, XM_021070340, XM_021070341, XM_021070342, XM_021070343, XM_021070344	13:145880093-145981116:+1	coiled-coil domain containing 191	Cluster0001
CCDC39	ENSSSCG00000011768	ENSSSCT00000012879, XM_021071236	13:118626330-118682281:-1	coiled-coil domain containing 39	Cluster0001
CCDC59	ENSSSCG00000038987	ENSSSCT00000064425	5:99358244-99367980:+1	coiled-coil domain containing 59	Cluster0001
CCDC90B	ENSSSCG00000014903	ENSSSCT00000016258, ENSSSCT00000052993, ENSSSCT00000065129, XM_003129718, XM_013979203	9:17414356-17446992:-1	coiled-coil domain containing 90B	Cluster0001
CCN6	ENSSSCG00000004422	ENSSSCT00000004887, ENSSSCT00000057912	1:78005360-78021145:+1	cellular communication network factor 6	Cluster0001
CCND2	ENSSSCG00000038694	ENSSSCT00000044116, ENSSSCT00000062210	5:66087379-66114616:-1	cyclin D2	Cluster0001
CCNH	ENSSSCG00000014147	ENSSSCT00000015451, ENSSSCT00000054912, ENSSSCT00000065980, XM_005661543, XM_005661544, XM_013994968, XM_013994969, XM_013994970, XM_013994971, XM_013994972, XM_021077281	2:94979956-95018726:-1	cyclin H	Cluster0001
CCNT1	ENSSSCG00000038181	ENSSSCT00000060508, XM_003481561	5:14768425-14806821:-1	cyclin T1	Cluster0001
CCNT2	ENSSSCG00000015697	ENSSSCT00000017097, XM_021075754, XM_021075756, XM_021075757, XM_021075758, XM_021075759, XM_021075760, XM_021075761, XM_021075762	15:16979672-17021248:-1	cyclin T2	Cluster0001
CCPG1	ENSSSCG00000004610	ENSSSCT00000005091, ENSSSCT00000031473, ENSSSCT00000044453, ENSSSCT00000048314, ENSSSCT00000053631, ENSSSCT00000064058, XM_021099673, XM_021099736, XM_021099788, XM_021099820, XM_021099858, XM_021099927, XM_021099998, XM_021100015, XM_021100040, XM_021100069	1:116449098-116522390:+1	cell cycle progression 1	Cluster0001
CD28	ENSSSCG00000028561	ENSSSCT00000022535	15:107127600-107162919:+1	CD28 molecule	Cluster0001
CD80	ENSSSCG00000011899	ENSSSCT00000013021, ENSSSCT00000033659, ENSSSCT00000034815, ENSSSCT00000041623, ENSSSCT00000049779, XM_021068533, XM_021068535	13:140693432-140731247:+1	CD80 molecule	Cluster0001
CDC27	ENSSSCG00000017308	ENSSSCT00000018844, ENSSSCT00000046519, ENSSSCT00000054238, ENSSSCT00000058263, XM_003131307, XM_005656938, XM_005656939, XM_013989920, XM_021066795, XM_021066796, XM_021066797	12:16810859-16882371:+1	cell division cycle 27	Cluster0001
CDC40	ENSSSCG00000004403	ENSSSCT00000004866, ENSSSCT00000046475, XM_003121352, XM_005652465	1:76179164-76234685:+1	cell division cycle 40	Cluster0001
CDC42BPA	ENSSSCG00000010862	ENSSSCT00000011884, ENSSSCT00000038398, ENSSSCT00000039715, ENSSSCT00000043351, ENSSSCT00000052341, ENSSSCT00000054261, ENSSSCT00000057313, ENSSSCT00000058000, ENSSSCT00000064427, XM_003482782, XM_021064422, XM_021064423, XM_021064425, XM_021064428, XM_021064430, XM_021064431, XM_021064432, XM_021064433, XM_021064434, XM_021064435, XM_021064437, XM_021064438, XM_021064440	10:14649277-14940830:-1	CDC42 binding protein kinase alpha	Cluster0001
CDK12	ENSSSCG00000017504	ENSSSCT00000019057, ENSSSCT00000040777, ENSSSCT00000053602, ENSSSCT00000057004, XM_003131505, XM_003358062, XM_005653930, XM_005653931, XM_021067051, XM_021067052, XM_021067053	12:22755956-22831356:-1	cyclin dependent kinase 12	Cluster0001
CDK13	ENSSSCG00000016769	ENSSSCT00000018255, XM_021078845	18:54313147-54429939:-1	cyclin dependent kinase 13	Cluster0001
CDK14	ENSSSCG00000015307	ENSSSCT00000016680, ENSSSCT00000040409, ENSSSCT00000040722, ENSSSCT00000040937, XM_021102363	9:70678582-71310252:+1	cyclin dependent kinase 14	Cluster0001
CDK19	ENSSSCG00000037424	ENSSSCT00000004858, ENSSSCT00000044968, ENSSSCT00000046900, ENSSSCT00000053920, ENSSSCT00000057673, ENSSSCT00000059751, XM_021091146, XM_021091165, XM_021091179	1:76589052-76793931:-1	cyclin dependent kinase 19	Cluster0001
CDK6	ENSSSCG00000040183	ENSSSCT00000034946, ENSSSCT00000035327, ENSSSCT00000053045	9:72518100-72765558:-1	cyclin dependent kinase 6	Cluster0001
CDK7	ENSSSCG00000016961	ENSSSCT00000018470, ENSSSCT00000054098, XM_021076536, XM_021076537, XM_021076538	16:47410138-47437521:+1	cyclin dependent kinase 7	Cluster0001
CDKAL1	ENSSSCG00000001080	ENSSSCT00000001175, ENSSSCT00000040980, ENSSSCT00000042404, ENSSSCT00000057787, ENSSSCT00000063418, XM_003128199, XM_005665616, XM_005665617, XM_005665619, XM_005665620, XM_005665623, XM_021099783, XM_021099784, XM_021099785, XM_021099786	7:15910494-16674989:+1	CDK5 regulatory subunit associated protein 1 like 1	Cluster0001
CDKN2AIPNL	ENSSSCG00000037127	ENSSSCT00000054735, ENSSSCT00000063858	2:136652465-136685955:-1	CDKN2A interacting protein N-terminal like	Cluster0001
CELF1	ENSSSCG00000013233	ENSSSCT00000014453, ENSSSCT00000036890, ENSSSCT00000038870, ENSSSCT00000039348, ENSSSCT00000044038, ENSSSCT00000047694, ENSSSCT00000049636, ENSSSCT00000053247, ENSSSCT00000053550, XM_021083076, XM_021083077, XM_021083078, XM_021083079, XM_021083080, XM_021083081, XM_021083082, XM_021083083, XM_021083084, XM_021083088, XM_021083089, XM_021083090, XM_021083091, XM_021083092, XM_021083093, XM_021083…	2:15066520-15154390:+1	CUGBP Elav-like family member 1	Cluster0001
CENPC	ENSSSCG00000008921	ENSSSCT00000009769, ENSSSCT00000059921, XM_021101386	8:65238062-65315788:-1	centromere protein C	Cluster0001
CENPK	ENSSSCG00000016946	ENSSSCT00000018454, XM_005672481, XM_021076784, XM_021076785, XM_021076786, XM_021076787	16:44042219-44080472:-1	centromere protein K	Cluster0001
CEP112	ENSSSCG00000023992	ENSSSCT00000018795, ENSSSCT00000027357, ENSSSCT00000052192, XM_021066725, XM_021066726, XM_021066727, XM_021066728, XM_021066729, XM_021066730, XM_021066731, XM_021066732	12:12397533-12815921:-1	centrosomal protein 112	Cluster0001
CEP120	ENSSSCG00000014239	ENSSSCT00000015559, ENSSSCT00000038553, ENSSSCT00000061703, XM_005661594, XM_013995057	2:126840263-126930236:-1	centrosomal protein 120	Cluster0001
CEP135	ENSSSCG00000022283	ENSSSCT00000031478, ENSSSCT00000052897, XM_021101350, XM_021101351, XM_021101352	8:55250621-55325388:+1	centrosomal protein 135	Cluster0001
CEP162	ENSSSCG00000004289	ENSSSCT00000004742, ENSSSCT00000038085, ENSSSCT00000057299, XM_005659266, XM_013992659, XM_013992660, XM_021089595, XM_021089607, XM_021089608	1:53329026-53442711:-1	centrosomal protein 162	Cluster0001
CEP290	ENSSSCG00000000926	ENSSSCT00000001011, ENSSSCT00000038054, ENSSSCT00000041889, ENSSSCT00000049055, ENSSSCT00000052762, ENSSSCT00000061535, ENSSSCT00000065935, XM_021092777	5:94383946-94469001:+1	centrosomal protein 290	Cluster0001
CEP295	ENSSSCG00000014946	ENSSSCT00000016304, ENSSSCT00000047165, ENSSSCT00000053790, ENSSSCT00000054502, ENSSSCT00000061483, ENSSSCT00000065668, XM_021062639	9:26103132-26155065:+1	centrosomal protein 295	Cluster0001
CEP350	ENSSSCG00000015531	ENSSSCT00000016919, XM_021063750	9:121607078-121741125:+1	centrosomal protein 350	Cluster0001
CEP68	ENSSSCG00000008360	ENSSSCT00000009154, ENSSSCT00000039584, ENSSSCT00000057474, ENSSSCT00000058150, ENSSSCT00000060946, XM_021087447, XM_021087448	3:76837899-76932659:-1	centrosomal protein 68	Cluster0001
CEP85L	ENSSSCG00000004249	ENSSSCT00000004696, XM_003121248	1:43392975-43559423:+1	centrosomal protein 85 like	Cluster0001
CERS6	ENSSSCG00000032715	ENSSSCT00000058572, ENSSSCT00000060525, XM_021075469, XM_021075470, XM_021075471	15:74927130-75261557:+1	ceramide synthase 6	Cluster0001
CETN2	.	XM_005673970	.	centrin 2	Cluster0001
CFAP99	ENSSSCG00000034633	ENSSSCT00000051364, XM_021100933	8:1328158-1352990:+1	cilia and flagella associated protein 99	Cluster0001
CGRRF1	ENSSSCG00000021451	ENSSSCT00000027967, XM_021102210, XM_021102212, XM_021102214, XM_021102217	1:183876905-183903895:+1	cell growth regulator with ring finger domain 1	Cluster0001
CHAC2	ENSSSCG00000037577	ENSSSCT00000045031, ENSSSCT00000053708, XM_003125149, XM_021088232	3:87403602-87416501:-1	ChaC cation transport regulator homolog 2	Cluster0001
CHD1	ENSSSCG00000014177	ENSSSCT00000015489, ENSSSCT00000022643, ENSSSCT00000032432, ENSSSCT00000056887, XM_021085397, XM_021085398, XM_021085399, XM_021085400	2:105113163-105203206:-1	chromodomain helicase DNA binding protein 1	Cluster0001
CHD2	ENSSSCG00000002266	ENSSSCT00000002524, ENSSSCT00000025402, ENSSSCT00000027293, ENSSSCT00000037867, ENSSSCT00000043688, ENSSSCT00000047171, ENSSSCT00000061746, ENSSSCT00000063923, XM_013978270, XM_013978275, XM_021099369, XM_021099370	7:85980766-86107778:-1	chromodomain helicase DNA binding protein 2	Cluster0001
CHD6	ENSSSCG00000007360	ENSSSCT00000008053, ENSSSCT00000043660, ENSSSCT00000045480, ENSSSCT00000047315, ENSSSCT00000055531, ENSSSCT00000058435, ENSSSCT00000065491, ENSSSCT00000065786, XM_021077868, XM_021077869, XM_021077870, XM_021077871, XM_021077872	17:44050008-44267340:-1	chromodomain helicase DNA binding protein 6	Cluster0001
CHD8	ENSSSCG00000002127	ENSSSCT00000002379, ENSSSCT00000052517, ENSSSCT00000056768, XM_003482263, XM_013978247, XM_013978249, XM_013978251, XM_013978252, XM_021099292, XM_021099293, XM_021099294, XM_021099295, XM_021099296, XM_021099297, XM_021099298, XM_021099300, XM_021099301, XM_021099302	7:77719517-77780205:+1	chromodomain helicase DNA binding protein 8	Cluster0001
CHD9	ENSSSCG00000033591	ENSSSCT00000040052, XM_021094174	6:31832493-31979935:-1	chromodomain helicase DNA binding protein 9	Cluster0001
CHM	ENSSSCG00000012463	ENSSSCT00000013630, ENSSSCT00000034355, ENSSSCT00000034485, ENSSSCT00000034932, XM_003135219, XM_021080638, XM_021080639, XM_021080640	X:68873359-69066325:-1	CHM, Rab escort protein 1	Cluster0001
CHML	ENSSSCG00000031212	ENSSSCT00000041144	10:11835585-11845808:+1	CHM like, Rab escort protein 2	Cluster0001
CHMP2B	ENSSSCG00000011997	ENSSSCT00000013128, ENSSSCT00000046434, XM_013990175, XM_013990176	13:168531817-168569669:-1	charged multivesicular body protein 2B	Cluster0001
CHMP5	ENSSSCG00000010995	ENSSSCT00000012036, ENSSSCT00000039850	10:33212767-33227911:-1	charged multivesicular body protein 5	Cluster0001
CHORDC1	ENSSSCG00000014934	ENSSSCT00000016291, ENSSSCT00000036879	9:23183802-23209543:-1	cysteine and histidine rich domain containing 1	Cluster0001
CHRNA3	ENSSSCG00000001752	ENSSSCT00000001958, ENSSSCT00000053544, ENSSSCT00000062231, ENSSSCT00000064641, XM_001925760	7:47361726-47384676:+1	cholinergic receptor nicotinic alpha 3 subunit	Cluster0001
CHRNA6	ENSSSCG00000023338	ENSSSCT00000025156, ENSSSCT00000045159, ENSSSCT00000046657, ENSSSCT00000066424, XM_003359871	17:11724257-11740071:-1	cholinergic receptor nicotinic alpha 6 subunit	Cluster0001
CHUK	ENSSSCG00000010548	ENSSSCT00000011540	14:111312022-111351669:-1	conserved helix-loop-helix ubiquitous kinase	Cluster0001
CLASP1	ENSSSCG00000039157	ENSSSCT00000017131, ENSSSCT00000024092, ENSSSCT00000040879, ENSSSCT00000042638, ENSSSCT00000060889, XM_021075147, XM_021075148, XM_021075150, XM_021075151, XM_021075152, XM_021075153, XM_021075154, XM_021075155, XM_021075156, XM_021075157, XM_021075158, XM_021075159, XM_021075161, XM_021075162, XM_021075163, XM_021075164, XM_021075165, XM_021075166, XM_021075167, XM_021075168, XM_021075169, XM_02…	15:29782544-30042725:+1	cytoplasmic linker associated protein 1	Cluster0001
CLEC12A	ENSSSCG00000039287	ENSSSCT00000045034	5:61922301-61940247:+1	C-type lectin domain family 12 member A	Cluster0001
CLINT1	ENSSSCG00000017047	ENSSSCT00000018560, ENSSSCT00000047716, ENSSSCT00000060942, XM_021076893, XM_021076894	16:65497232-65555313:+1	clathrin interactor 1	Cluster0001
CLK4	ENSSSCG00000014028	ENSSSCT00000015323, ENSSSCT00000039001, XM_003123650, XM_005654961, XM_005654962, XM_021084351, XM_021084352, XM_021084353, XM_021084354, XM_021084355, XM_021084356	2:79729482-79752939:+1	CDC like kinase 4	Cluster0001
CLOCK	ENSSSCG00000008909	ENSSSCT00000009755, ENSSSCT00000009757, ENSSSCT00000039975, ENSSSCT00000048111, ENSSSCT00000048864, ENSSSCT00000052116, ENSSSCT00000059916, XM_021101318, XM_021101320, XM_021101321, XM_021101323, XM_021101324, XM_021101325, XM_021101327, XM_021101329, XM_021101330, XM_021101331, XM_021101332, XM_021101333, XM_021101334, XM_021101335	8:54788863-54910133:-1	clock circadian regulator	Cluster0001
CLSPN	ENSSSCG00000003628	ENSSSCT00000004024, ENSSSCT00000042351, XM_021095922, XM_021095923, XM_021095924	6:91903714-91941692:-1	claspin	Cluster0001
CLTC	ENSSSCG00000022659	ENSSSCT00000027653, ENSSSCT00000033168, XM_021066047, XM_021066049	12:35848535-35926019:+1	clathrin heavy chain	Cluster0001
CMTR2	ENSSSCG00000033156	ENSSSCT00000060062, XM_021093815, XM_021093816	6:14323278-14333763:-1	cap methyltransferase 2	Cluster0001
CNIH1	ENSSSCG00000027256	ENSSSCT00000022519, ENSSSCT00000050324	1:183810849-183829200:-1	cornichon family AMPA receptor auxiliary protein 1	Cluster0001
CNOT1	ENSSSCG00000002799	ENSSSCT00000003099, ENSSSCT00000023952, ENSSSCT00000052383, ENSSSCT00000055198, ENSSSCT00000060693, ENSSSCT00000062805, XM_021093953, XM_021093954, XM_021093955, XM_021093956, XM_021093957, XM_021093958, XM_021093959, XM_021093960, XM_021093962, XM_021093963, XM_021093964, XM_021093965, XM_021093966	6:20271594-20372920:-1	CCR4-NOT transcription complex subunit 1	Cluster0001
CNOT2	ENSSSCG00000000502	ENSSSCT00000000541, ENSSSCT00000040735, ENSSSCT00000046336, ENSSSCT00000049259, ENSSSCT00000055525, ENSSSCT00000061741, ENSSSCT00000063368, ENSSSCT00000064126	5:34426399-34550088:+1	CCR4-NOT transcription complex subunit 2	Cluster0001
CNOT4	ENSSSCG00000021354	ENSSSCT00000017996, ENSSSCT00000029334, ENSSSCT00000043394, ENSSSCT00000046643, ENSSSCT00000053462, XM_021078768, XM_021078769, XM_021078770, XM_021078772, XM_021078773	18:13821546-14006761:+1	CCR4-NOT transcription complex subunit 4	Cluster0001
CNOT6	ENSSSCG00000014009	ENSSSCT00000015302, ENSSSCT00000044313, ENSSSCT00000047369, XM_003123627, XM_013994856, XM_013994859, XM_021084315	2:78130842-78202504:-1	CCR4-NOT transcription complex subunit 6	Cluster0001
CNOT6L	ENSSSCG00000008989	ENSSSCT00000009846, ENSSSCT00000040815, ENSSSCT00000041786, ENSSSCT00000051409, ENSSSCT00000056702, XM_021100608, XM_021100609, XM_021100612, XM_021100613	8:73194478-73305308:-1	CCR4-NOT transcription complex subunit 6 like	Cluster0001
CNOT7	ENSSSCG00000006983	ENSSSCT00000007648, ENSSSCT00000007651, ENSSSCT00000038577, ENSSSCT00000042803, XM_003483868, XM_005672641, XM_013984984, XM_021078072	17:4926156-4949607:-1	CCR4-NOT transcription complex subunit 7	Cluster0001
CNST	ENSSSCG00000010882	ENSSSCT00000011905, ENSSSCT00000036817, XM_021064469, XM_021064470	10:19046380-19140303:+1	consortin, connexin sorting protein	Cluster0001
CNTN3	ENSSSCG00000011522	ENSSSCT00000012610, ENSSSCT00000039178, ENSSSCT00000039741, ENSSSCT00000045538, ENSSSCT00000055003, ENSSSCT00000060175, ENSSSCT00000060774, ENSSSCT00000062604, ENSSSCT00000064417, XM_021069224, XM_021069225, XM_021069227, XM_021069228, XM_021069229, XM_021069230, XM_021069231, XM_021069233, XM_021069234, XM_021069235, XM_021069236, XM_021069237, XM_021069238, XM_021069239	13:55648514-56019207:-1	contactin 3	Cluster0001
COL4A3BP	ENSSSCG00000014081	ENSSSCT00000026755, XM_021084454	2:84417409-84537369:-1	collagen type IV alpha 3 binding protein	Cluster0001
COMMD10	ENSSSCG00000014223	ENSSSCT00000015541, ENSSSCT00000038009, ENSSSCT00000058424, XM_005661591, XM_013995040, XM_013995042, XM_013995043, XM_021079246, XM_021079249, XM_021079259, XM_021079267, XM_021079292, XM_021079305, XM_021079322, XM_021079329	2:120238616-120429907:+1	COMM domain containing 10	Cluster0001
COMMD8	ENSSSCG00000033373	ENSSSCT00000040940, ENSSSCT00000048831, XM_003128956, XM_021100563, XM_021100564	8:37336985-37380396:-1	COMM domain containing 8	Cluster0001
COPS2	ENSSSCG00000004652	ENSSSCT00000005137, ENSSSCT00000049645, XM_021072083	1:122542409-122575007:+1	COP9 signalosome subunit 2	Cluster0001
CORO1C	ENSSSCG00000009944	ENSSSCT00000010896, ENSSSCT00000031523, ENSSSCT00000057469, XM_001929345, XM_005670752	14:42062365-42145124:+1	coronin 1C	Cluster0001
COX18	ENSSSCG00000008947	ENSSSCT00000009801, ENSSSCT00000050797	8:69274028-69354896:-1	mitochondrial inner membrane protein COX18	Cluster0001
COX7A2L	ENSSSCG00000008466	ENSSSCT00000009268, ENSSSCT00000045711	3:97951110-97984009:+1	cytochrome c oxidase subunit 7A-related protein, mitochondrial	Cluster0001
CPA6	ENSSSCG00000006200	ENSSSCT00000006795, ENSSSCT00000034412, XM_013996693, XM_021089270, XM_021089271	4:67158043-67411613:+1	carboxypeptidase A6	Cluster0001
CPLANE1	ENSSSCG00000016843	ENSSSCT00000018340, ENSSSCT00000047199, ENSSSCT00000056694, ENSSSCT00000060439, ENSSSCT00000065360	16:22379885-22497499:-1	ciliogenesis and planar polarity effector 1	Cluster0001
CPSF2	ENSSSCG00000002447	ENSSSCT00000002717, ENSSSCT00000037118, ENSSSCT00000043192, XM_021099625, XM_021099626, XM_021099627	7:113659452-113691241:+1	cleavage and polyadenylation specific factor 2	Cluster0001
CPSF6	ENSSSCG00000038031	ENSSSCT00000039379, ENSSSCT00000041371, ENSSSCT00000053818, ENSSSCT00000055283, ENSSSCT00000064622, XM_021090899, XM_021090900, XM_021090901, XM_021090903, XM_021090904, XM_021090905	5:33501353-33559987:+1	cleavage and polyadenylation specific factor 6	Cluster0001
CREB1	ENSSSCG00000034395	ENSSSCT00000039485, ENSSSCT00000040624, ENSSSCT00000045029, ENSSSCT00000051771, ENSSSCT00000063875, XM_021075304, XM_021075308, XM_021075309, XM_021075310, XM_021075311	15:110705580-110772401:+1	cAMP responsive element binding protein 1	Cluster0001
CREBRF	ENSSSCG00000016986	ENSSSCT00000018496, ENSSSCT00000049310, ENSSSCT00000063982, XM_005657631, XM_013990647, XM_021076896, XM_021076898	16:51146042-51260684:-1	CREB3 regulatory factor	Cluster0001
CRHR2	ENSSSCG00000033514	ENSSSCT00000054973, ENSSSCT00000057070, XM_021078456, XM_021078457, XM_021078458, XM_021078459	18:42251834-42297289:+1	corticotropin releasing hormone receptor 2	Cluster0001
CRK	ENSSSCG00000033812	ENSSSCT00000048357, XM_021066038, XM_021066039	12:47657839-47690398:-1	CRK proto-oncogene, adaptor protein	Cluster0001
CRYBA1	ENSSSCG00000040641	ENSSSCT00000052274, ENSSSCT00000056050, XM_021067510	12:45466530-45473129:+1	crystallin beta A1	Cluster0001
CRYGS	ENSSSCG00000040431	ENSSSCT00000040120, ENSSSCT00000041862, XM_001926147	13:124355012-124363477:-1	crystallin gamma S	Cluster0001
CSNK1A1	.	XM_003124088, XM_003354351, XM_005661799, XM_005661801, XM_021085007	.	casein kinase 1 alpha 1	Cluster0001
CSNK1G1	ENSSSCG00000004558	ENSSSCT00000005035, ENSSSCT00000046925, ENSSSCT00000060507, ENSSSCT00000063162, XM_005659506, XM_021093855, XM_021093872	1:107690006-107884050:+1	casein kinase 1 gamma 1	Cluster0001
CSNK1G3	ENSSSCG00000014240	ENSSSCT00000015560, ENSSSCT00000049569, ENSSSCT00000058378, ENSSSCT00000064332, XM_021084688, XM_021084690, XM_021084691, XM_021084692, XM_021084693, XM_021084694, XM_021084695, XM_021084696, XM_021084697, XM_021084698, XM_021084699, XM_021084700, XM_021084701	2:127017026-127130631:+1	casein kinase 1 gamma 3	Cluster0001
CSPP1	ENSSSCG00000006202	ENSSSCT00000006797, ENSSSCT00000029434, ENSSSCT00000045141, ENSSSCT00000046810, ENSSSCT00000047786, ENSSSCT00000063543, XM_005663038, XM_005663039, XM_005663040, XM_005663041, XM_005663042, XM_013996695, XM_013996699, XM_013996700, XM_013996701, XM_013996702, XM_021089272, XM_021089273, XM_021089274, XM_021089275, XM_021089276, XM_021089277	4:67613655-67738877:-1	centrosome and spindle pole associated protein 1	Cluster0001
CTDSPL2	ENSSSCG00000035827	ENSSSCT00000048521, ENSSSCT00000063792, XM_021096494, XM_021096504, XM_021096513, XM_021096524, XM_021096535	1:127028849-127125410:-1	CTD small phosphatase like 2	Cluster0001
CTR9	ENSSSCG00000013406	ENSSSCT00000014646, ENSSSCT00000058352, XM_021083325	2:48697163-48729516:-1	CTR9 homolog, Paf1/RNA polymerase II complex component	Cluster0001
CTSO	ENSSSCG00000008867	ENSSSCT00000009707, ENSSSCT00000058051	8:44728991-44765230:-1	cathepsin O	Cluster0001
CUL2	ENSSSCG00000011104	ENSSSCT00000012151	10:57701112-57768379:-1	cullin 2	Cluster0001
CWC22	ENSSSCG00000016008	ENSSSCT00000017430, XM_003133514, XM_005671989, XM_013984315	15:85542295-85605901:-1	CWC22 spliceosome associated protein homolog	Cluster0001
CWC27	ENSSSCG00000016942	ENSSSCT00000018450, ENSSSCT00000044880, XM_021076543, XM_021076544	16:43345584-43593474:+1	CWC27 spliceosome associated protein homolog	Cluster0001
CWF19L1	ENSSSCG00000010550	ENSSSCT00000011542, XM_013983660, XM_013983661, XM_013983662, XM_013983663, XM_021072386, XM_021072387	14:111354603-111387740:-1	CWF19 like 1, cell cycle control (S. pombe)	Cluster0001
CXCR3	ENSSSCG00000012402	ENSSSCT00000033181, XM_003135179	X:57591012-57595434:-1	C-X-C motif chemokine receptor 3	Cluster0001
CXHXorf23	.	XM_005673485, XM_013985984, XM_013985985, XM_021080781, XM_021080782, XM_021080783, XM_021080784, XM_021080785, XM_021080786, XM_021080787, XM_021080788	.	chromosome X CXorf23 homolog	Cluster0001
CXorf56	ENSSSCG00000012622	ENSSSCT00000013801	X:97971831-97986333:-1	chromosome X CXorf56 homolog	Cluster0001
CYP20A1	ENSSSCG00000016118	ENSSSCT00000017549, ENSSSCT00000038809, ENSSSCT00000045406, ENSSSCT00000054292, ENSSSCT00000054340, ENSSSCT00000059664	15:106516324-106763536:+1	neurobeachin like 1	Cluster0001
DCAF10	ENSSSCG00000005356	ENSSSCT00000005896, ENSSSCT00000044900, ENSSSCT00000060291, XM_021066212, XM_021066214	1:238567589-238628415:+1	DDB1 and CUL4 associated factor 10	Cluster0001
DCLRE1C	ENSSSCG00000011049	ENSSSCT00000012093, ENSSSCT00000041140, ENSSSCT00000043043, ENSSSCT00000046734, ENSSSCT00000060736, ENSSSCT00000061074, XM_021063988, XM_021063989, XM_021063990	10:46820000-46868033:+1	DNA cross-link repair 1C	Cluster0001
DCP2	ENSSSCG00000014204	ENSSSCT00000015522, ENSSSCT00000038180, ENSSSCT00000049147, XM_003123832	2:116743012-116804633:-1	decapping mRNA 2	Cluster0001
DCTN6	ENSSSCG00000038895	ENSSSCT00000050716	15:54872208-54895883:-1	dynactin subunit 6	Cluster0001
DDX17	ENSSSCG00000000104	ENSSSCT00000000110, ENSSSCT00000054754, ENSSSCT00000059784	5:9485487-9505157:+1	DEAD-box helicase 17	Cluster0001
DDX3X	ENSSSCG00000012252	ENSSSCT00000013398, ENSSSCT00000041730, XM_005673561	X:36989260-37005523:+1	DEAD-box helicase 3, X-linked	Cluster0001
DDX5	ENSSSCG00000032092	ENSSSCT00000038465, ENSSSCT00000044670, ENSSSCT00000049450, ENSSSCT00000057534, ENSSSCT00000058299, ENSSSCT00000065017, ENSSSCT00000065237, XM_021066758, XM_021066760, XM_021066761	12:14571687-14582970:+1	DEAD-box helicase 5	Cluster0001
DDX50	ENSSSCG00000010246	ENSSSCT00000011216, ENSSSCT00000042413, XM_003133052, XM_005657388, XM_005657389, XM_021072504	14:71989533-72030993:+1	DExD-box helicase 50	Cluster0001
DDX6	ENSSSCG00000015097	ENSSSCT00000016463, ENSSSCT00000043421, ENSSSCT00000054132, ENSSSCT00000058313, ENSSSCT00000062639, ENSSSCT00000066230, XM_003129914, XM_005667408, XM_005667409, XM_005667410, XM_013979454, XM_013979455, XM_021062947	9:46025445-46063836:-1	DEAD-box helicase 6	Cluster0001
DENND1B	ENSSSCG00000010900	ENSSSCT00000011926, ENSSSCT00000042034, ENSSSCT00000049148, ENSSSCT00000062646, XM_021064483	10:20392326-20707474:-1	DENN domain containing 1B	Cluster0001
DENND4A	ENSSSCG00000004938	ENSSSCT00000005449, ENSSSCT00000039194, ENSSSCT00000044216, ENSSSCT00000058982, XM_021100187	1:163659936-163790227:-1	DENN domain containing 4A	Cluster0001
DENND4C	ENSSSCG00000005170	ENSSSCT00000005700, ENSSSCT00000052325, ENSSSCT00000055612, XM_021063185	1:203449835-203601371:-1	DENN domain containing 4C	Cluster0001
DENND5B	ENSSSCG00000022636	ENSSSCT00000024435, ENSSSCT00000027035, ENSSSCT00000029878, ENSSSCT00000058288, ENSSSCT00000064369, XM_021092091, XM_021092093, XM_021092094, XM_021092096	5:42642896-42867359:+1	DENN domain containing 5B	Cluster0001
DENND6A	ENSSSCG00000011467	ENSSSCT00000012548, ENSSSCT00000012549, ENSSSCT00000026579, ENSSSCT00000058112, XM_021069009, XM_021069010, XM_021069011, XM_021069012	13:39457895-39567446:-1	DENN domain containing 6A	Cluster0001
DEPDC4	ENSSSCG00000036721	ENSSSCT00000048632, XM_013998040	5:83878603-83894636:+1	DEP domain containing 4	Cluster0001
DGKH	ENSSSCG00000009431	ENSSSCT00000010338, ENSSSCT00000038721, ENSSSCT00000038881, ENSSSCT00000043201, ENSSSCT00000046329, ENSSSCT00000055857, XM_021065624	11:24784441-24964414:-1	diacylglycerol kinase eta	Cluster0001
DHX29	ENSSSCG00000016907	ENSSSCT00000018413, ENSSSCT00000025611, ENSSSCT00000030291, XM_003133948, XM_013984775	16:34425720-34478878:-1	DExH-box helicase 29	Cluster0001
DHX36	ENSSSCG00000024916	ENSSSCT00000027576, XM_021069687, XM_021069688	13:94299605-94350303:-1	DEAH-box helicase 36	Cluster0001
DHX57	ENSSSCG00000008479	ENSSSCT00000009281, ENSSSCT00000027140, ENSSSCT00000045436, ENSSSCT00000047956, XM_021087592, XM_021087593, XM_021087594	3:101458895-101569798:+1	DExH-box helicase 57	Cluster0001
DIAPH2	ENSSSCG00000012474	ENSSSCT00000013641, XM_021080479, XM_021080480, XM_021080481, XM_021080482	X:78602537-79519058:+1	diaphanous related formin 2	Cluster0001
DICER1	ENSSSCG00000028225	ENSSSCT00000022914, ENSSSCT00000038351, ENSSSCT00000039889, ENSSSCT00000049913, ENSSSCT00000050852, ENSSSCT00000059204, XM_013989222, XM_013989223, XM_021098166, XM_021098167, XM_021098168, XM_021098170, XM_021098171, XM_021098172, XM_021098173, XM_021098174, XM_021098176, XM_021098177, XM_021098178, XM_021098180, XM_021098181, XM_021098183	7:116361678-116436396:-1	dicer 1, ribonuclease III	Cluster0001
DIS3L	ENSSSCG00000004941	ENSSSCT00000005453, ENSSSCT00000024119, ENSSSCT00000039494, XM_021100270, XM_021100274	1:164309837-164351928:+1	DIS3 like exosome 3 -5 exoribonuclease	Cluster0001
DLG1	ENSSSCG00000011833	ENSSSCT00000012945, ENSSSCT00000033279, ENSSSCT00000034060, ENSSSCT00000041463, ENSSSCT00000047155, ENSSSCT00000047590, ENSSSCT00000055575, ENSSSCT00000057107, XM_005670090, XM_005670091, XM_005670092, XM_005670093, XM_005670094, XM_021070092, XM_021070093, XM_021070094, XM_021070095, XM_021070096, XM_021070098, XM_021070099, XM_021070100, XM_021070101, XM_021070102, XM_021070103, XM_021070104, X…	13:132820911-133086841:+1	discs large MAGUK scaffold protein 1	Cluster0001
DMAC2L	ENSSSCG00000031354	ENSSSCT00000039137, ENSSSCT00000041018	1:180069138-180081412:+1	distal membrane arm assembly complex 2 like	Cluster0001
DMTF1	ENSSSCG00000015393	ENSSSCT00000016768, ENSSSCT00000051661, ENSSSCT00000053118, ENSSSCT00000059103, ENSSSCT00000063267, XM_005656701, XM_005656704, XM_013989601, XM_021063470, XM_021063471	9:93416453-93463082:-1	cyclin D binding myb like transcription factor 1	Cluster0001
DMXL1	ENSSSCG00000027857	ENSSSCT00000024571, ENSSSCT00000031873, ENSSSCT00000046477, XM_021084664, XM_021084665, XM_021084666, XM_021084667, XM_021084668, XM_021084669, XM_021084670, XM_021084671, XM_021084672	2:123002933-123139318:+1	Dmx like 1	Cluster0001
DNAJA2	ENSSSCG00000002846	ENSSSCT00000003147, ENSSSCT00000035203, XM_003126994	6:37591569-37692578:+1	DnaJ heat shock protein family (Hsp40) member A2	Cluster0001
DNAJB14	ENSSSCG00000009177	ENSSSCT00000010050, ENSSSCT00000046070, XM_021101721, XM_021101722, XM_021101723, XM_021101724	8:120567390-120623513:+1	DnaJ heat shock protein family (Hsp40) member B14	Cluster0001
DNAJC10	ENSSSCG00000016017	ENSSSCT00000017440, ENSSSCT00000055807, ENSSSCT00000061963, ENSSSCT00000063475, ENSSSCT00000066241, XM_021076312, XM_021076313, XM_021076314	15:88198611-88258464:+1	DnaJ heat shock protein family (Hsp40) member C10	Cluster0001
DNAJC13	ENSSSCG00000011628	ENSSSCT00000012725, ENSSSCT00000054517, ENSSSCT00000055186, ENSSSCT00000064607, XM_003132418, XM_021069457	13:73573926-73710844:+1	DnaJ heat shock protein family (Hsp40) member C13	Cluster0001
DNAJC24	ENSSSCG00000026083	ENSSSCT00000032359, ENSSSCT00000059636, XM_013994473, XM_013994474	2:29305410-29365167:-1	DnaJ heat shock protein family (Hsp40) member C24	Cluster0001
DNAJC28	ENSSSCG00000028192	ENSSSCT00000024359, XM_003358936	13:197112304-197113551:-1	DnaJ heat shock protein family (Hsp40) member C28	Cluster0001
DOCK7	ENSSSCG00000003818	ENSSSCT00000004225, ENSSSCT00000047866, ENSSSCT00000054439, ENSSSCT00000060418, ENSSSCT00000065151, XM_021096545, XM_021096546, XM_021096548, XM_021096549, XM_021096550, XM_021096551, XM_021096552	6:149747860-149971847:+1	dedicator of cytokinesis 7	Cluster0001
DOP1A	ENSSSCG00000004457	ENSSSCT00000004923, ENSSSCT00000022952, ENSSSCT00000035912, ENSSSCT00000037010, ENSSSCT00000046795	1:83026514-83141042:-1	DOP1 leucine zipper like protein A	Cluster0001
DOPEY1	.	XM_003480309, XM_005659411, XM_021091824, XM_021091831, XM_021091842, XM_021091853, XM_021091863, XM_021091876, XM_021091892	.	dopey family member 1	Cluster0001
DPM1	ENSSSCG00000034952	ENSSSCT00000008179, ENSSSCT00000040191, XM_013985457	17:52350235-52377275:-1	dolichyl-phosphate mannosyltransferase subunit 1, catalytic	Cluster0001
DPP8	ENSSSCG00000004934	ENSSSCT00000005445, ENSSSCT00000034112, ENSSSCT00000034461, ENSSSCT00000035110, ENSSSCT00000036317, XM_001929097, XM_005659849	1:163446885-163517416:-1	dipeptidyl peptidase 8	Cluster0001
DPY19L4	ENSSSCG00000006098	ENSSSCT00000006689, ENSSSCT00000047479, ENSSSCT00000053370, ENSSSCT00000058605, ENSSSCT00000062305, XM_005662961, XM_021089086	4:41925625-41985855:-1	dpy-19 like 4 (C. elegans)	Cluster0001
DTD2	ENSSSCG00000026663	ENSSSCT00000032499, XM_013978134, XM_013978135	7:68106227-68116983:+1	D-tyrosyl-tRNA deacylase 2 (putative)	Cluster0001
DTWD2	ENSSSCG00000014225	ENSSSCT00000015543, ENSSSCT00000026355, XM_003480896, XM_021084662, XM_021084663	2:122817435-122936995:-1	DTW domain containing 2	Cluster0001
DUSP11	ENSSSCG00000008298	ENSSSCT00000009088, ENSSSCT00000036998, ENSSSCT00000039455, ENSSSCT00000039748, ENSSSCT00000043615, ENSSSCT00000044521, ENSSSCT00000064275, XM_003125007	3:69187569-69226315:+1	dual specificity phosphatase 11	Cluster0001
DYNC1LI1	ENSSSCG00000011233	ENSSSCT00000012300, ENSSSCT00000059524, XM_021071542	13:18506260-18558062:-1	dynein cytoplasmic 1 light intermediate chain 1	Cluster0001
DYNC2H1	.	XM_021062717	.	dynein cytoplasmic 2 heavy chain 1	Cluster0001
DYRK1A	ENSSSCG00000030480	ENSSSCT00000013196, ENSSSCT00000028889, ENSSSCT00000041061, ENSSSCT00000059892, XM_005670334, XM_005670335, XM_005670336, XM_013982583, XM_013982584, XM_013982585, XM_021070970, XM_021070971, XM_021070972, XM_021070973	13:201008329-201159952:+1	dual specificity tyrosine phosphorylation regulated kinase 1A	Cluster0001
DZIP3	ENSSSCG00000011940	ENSSSCT00000013065, ENSSSCT00000037908, ENSSSCT00000049075, ENSSSCT00000057462, XM_021070418, XM_021070419, XM_021070420, XM_021070421, XM_021070422, XM_021070423, XM_021070424, XM_021070425, XM_021070426, XM_021070428, XM_021070429, XM_021070430, XM_021070431	13:150796667-150933799:-1	DAZ interacting zinc finger protein 3	Cluster0001
E2F3	ENSSSCG00000040178	ENSSSCT00000043429, ENSSSCT00000050079, XM_021098397, XM_021098399	7:15793995-15870059:+1	E2F transcription factor 3	Cluster0001
EBAG9	ENSSSCG00000006024	ENSSSCT00000006611, ENSSSCT00000047634, ENSSSCT00000059006, XM_013988048	4:27986866-28013914:-1	estrogen receptor binding site associated, antigen, 9	Cluster0001
EDEM3	ENSSSCG00000015566	ENSSSCT00000016956, ENSSSCT00000045584, ENSSSCT00000050142, ENSSSCT00000064334, XM_021102624, XM_021102626, XM_021102627, XM_021102628, XM_021102629	9:125908842-125983079:-1	ER degradation enhancing alpha-mannosidase like protein 3	Cluster0001
EFCAB7	ENSSSCG00000003814	ENSSSCT00000004221, ENSSSCT00000052439, XM_013988883	6:148939053-148996669:-1	EF-hand calcium binding domain 7	Cluster0001
EHBP1	ENSSSCG00000008372	ENSSSCT00000009167, ENSSSCT00000024919, ENSSSCT00000037536, ENSSSCT00000046220, ENSSSCT00000049734, ENSSSCT00000052845, ENSSSCT00000054931, ENSSSCT00000059752, ENSSSCT00000061355, ENSSSCT00000061454, XM_021087469, XM_021087470, XM_021087471, XM_021087472, XM_021087473, XM_021087474, XM_021087475, XM_021087476, XM_021087477, XM_021087478	3:78896498-79345378:-1	EH domain binding protein 1	Cluster0001
EIF2AK3	ENSSSCG00000008208	ENSSSCT00000008989, ENSSSCT00000032709, ENSSSCT00000056246, ENSSSCT00000064768	3:57423943-57506246:+1	eukaryotic translation initiation factor 2 alpha kinase 3	Cluster0001
EIF2AK4	ENSSSCG00000039061	ENSSSCT00000024247, ENSSSCT00000038114, ENSSSCT00000041164, ENSSSCT00000045624, ENSSSCT00000048679, ENSSSCT00000054025, ENSSSCT00000054318, ENSSSCT00000056508, ENSSSCT00000057886, ENSSSCT00000059269, XM_021097873, XM_021097878, XM_021097886	1:131241571-131355291:-1	eukaryotic translation initiation factor 2 alpha kinase 4	Cluster0001
ELAC1	ENSSSCG00000024479	ENSSSCT00000026385, XM_003121444	1:100514767-100535987:+1	elaC ribonuclease Z 1	Cluster0001
ELF2	ENSSSCG00000029920	ENSSSCT00000023729, ENSSSCT00000037210, ENSSSCT00000044832, ENSSSCT00000049971, XM_021101561, XM_021101562, XM_021101563, XM_021101564, XM_021101565, XM_021101566, XM_021101567, XM_021101568, XM_021101571, XM_021101572, XM_021101573, XM_021101574, XM_021101575, XM_021101576, XM_021101577, XM_021101579, XM_021101580, XM_021101581, XM_021101582, XM_021101583, XM_021101584	8:87774594-87878662:+1	E74 like ETS transcription factor 2	Cluster0001
ELF5	ENSSSCG00000013301	ENSSSCT00000014527, ENSSSCT00000040051, XM_005660986, XM_005660987, XM_021077723	2:26443977-26488445:+1	E74 like ETS transcription factor 5	Cluster0001
ELK4	ENSSSCG00000025182	ENSSSCT00000028838, ENSSSCT00000037380, ENSSSCT00000056047, XM_003357396, XM_005667536	9:66297338-66316374:-1	ELK4, ETS transcription factor	Cluster0001
ELMOD2	ENSSSCG00000009055	ENSSSCT00000009919, ENSSSCT00000064745, XM_021101556	8:86527552-86569395:-1	ELMO domain containing 2	Cluster0001
ELP1	ENSSSCG00000005441	ENSSSCT00000005985, ENSSSCT00000056556, ENSSSCT00000063138, XM_001924394	1:249905472-249980543:+1	elongator complex protein 1	Cluster0001
EMC2	ENSSSCG00000006032	ENSSSCT00000006621, ENSSSCT00000041057, ENSSSCT00000059680, ENSSSCT00000061152, ENSSSCT00000064438, XM_021089015, XM_021089016, XM_021089017, XM_021089018, XM_021089019, XM_021089020, XM_021089021, XM_021089022, XM_021089023, XM_021089024	4:29024670-29079125:-1	ER membrane protein complex subunit 2	Cluster0001
EML4	ENSSSCG00000008467	ENSSSCT00000009269, ENSSSCT00000043652, ENSSSCT00000047843, XM_003125196, XM_005662587, XM_005662588, XM_013996185, XM_013996186	3:98005813-98155842:-1	echinoderm microtubule associated protein like 4	Cluster0001
EMSY	ENSSSCG00000014868	ENSSSCT00000016221, ENSSSCT00000042237, ENSSSCT00000062021, ENSSSCT00000062151, ENSSSCT00000062543, ENSSSCT00000062568, ENSSSCT00000065038, XM_003482569, XM_005667141, XM_005667143, XM_005667144, XM_005667148, XM_013979150, XM_013979151, XM_013979152, XM_013979153, XM_013979154, XM_013979155, XM_013979156, XM_013979157, XM_013979158, XM_013979159, XM_021062538, XM_021062539, XM_021062540, XM_0210…	9:10628053-10716398:+1	EMSY, BRCA2 interacting transcriptional repressor	Cluster0001
ENSSSCG00000000081	ENSSSCG00000000081	ENSSSCT00000000087	5:8534267-8553015:+1	No Class	Cluster0001
ENSSSCG00000000608	ENSSSCG00000000608	ENSSSCT00000000654	5:57723338-57725790:+1	No Class	Cluster0001
ENSSSCG00000000638	ENSSSCG00000000638	ENSSSCT00000000687	5:61556450-61568088:+1	killer cell lectin-like receptor 8	Cluster0001
ENSSSCG00000001088	ENSSSCG00000001088	ENSSSCT00000001184	7:19272032-19272388:-1	No Class	Cluster0001
ENSSSCG00000001202	ENSSSCG00000001202	ENSSSCT00000001300	7:22010409-22011463:+1	No Class	Cluster0001
ENSSSCG00000001395	ENSSSCG00000001395	ENSSSCT00000001520	7:23616984-23621159:-1	No Class	Cluster0001
ENSSSCG00000001612	ENSSSCG00000001612	ENSSSCT00000001792, ENSSSCT00000027428	7:36411189-36453132:+1	adenylate cyclase type 10	Cluster0001
ENSSSCG00000001950	ENSSSCG00000001950	ENSSSCT00000002182, ENSSSCT00000040635, ENSSSCT00000066254	7:64620226-64763453:-1	KIAA0391 ortholog	Cluster0001
ENSSSCG00000001956	ENSSSCG00000001956	ENSSSCT00000024498	7:64876955-64905741:+1	uncharacterized LOC100153150	Cluster0001
ENSSSCG00000001982	ENSSSCG00000001982	ENSSSCT00000002218, ENSSSCT00000025429	7:74826914-74830017:+1	No Class	Cluster0001
ENSSSCG00000002081	ENSSSCG00000002081	ENSSSCT00000002326	7:76978175-76979901:-1	No Class	Cluster0001
ENSSSCG00000002260	ENSSSCG00000002260	ENSSSCT00000002517, ENSSSCT00000032333	7:88015484-88046066:+1	No Class	Cluster0001
ENSSSCG00000002841	ENSSSCG00000002841	ENSSSCT00000003142, ENSSSCT00000058108	6:36122035-36188003:+1	NEDD4 binding protein 1	Cluster0001
ENSSSCG00000002876	ENSSSCG00000002876	ENSSSCT00000003178, ENSSSCT00000038576, ENSSSCT00000058445	6:44103215-44119940:+1	No Class	Cluster0001
ENSSSCG00000002877	ENSSSCG00000002877	ENSSSCT00000003179, ENSSSCT00000042052, ENSSSCT00000048797, ENSSSCT00000052302	6:44243314-44357540:+1	zinc finger protein 181	Cluster0001
ENSSSCG00000002935	ENSSSCG00000002935	ENSSSCT00000003248, ENSSSCT00000038450, ENSSSCT00000055356	6:46093204-46121776:-1	zinc finger protein 568	Cluster0001
ENSSSCG00000002937	ENSSSCG00000002937	ENSSSCT00000040852, ENSSSCT00000046937	6:46484117-46530389:-1	zinc finger protein 420	Cluster0001
ENSSSCG00000002938	ENSSSCG00000002938	ENSSSCT00000003260	6:46209122-46229060:-1	No Class	Cluster0001
ENSSSCG00000002941	ENSSSCG00000002941	ENSSSCT00000003263, ENSSSCT00000063856	6:57627154-57662259:+1	No Class	Cluster0001
ENSSSCG00000003012	ENSSSCG00000003012	ENSSSCT00000003345, ENSSSCT00000039400	6:49481906-49490586:+1	No Class	Cluster0001
ENSSSCG00000003277	ENSSSCG00000003277	ENSSSCT00000003639, ENSSSCT00000049756	6:59186265-59208337:+1	No Class	Cluster0001
ENSSSCG00000003303	ENSSSCG00000003303	ENSSSCT00000003667, ENSSSCT00000044144, ENSSSCT00000053023	6:59860495-59868085:-1	ret finger protein-like 4A	Cluster0001
ENSSSCG00000003322	ENSSSCG00000003322	ENSSSCT00000003688, ENSSSCT00000036749	6:60721485-60750617:+1	zinc finger protein 582	Cluster0001
ENSSSCG00000003667	ENSSSCG00000003667	ENSSSCT00000004063, ENSSSCT00000045812	6:95629628-95683807:-1	tRNA isopentenyltransferase 1	Cluster0001
ENSSSCG00000003741	ENSSSCG00000003741	ENSSSCT00000004142, ENSSSCT00000041427, ENSSSCT00000043383, ENSSSCT00000045162	6:119104467-119132976:+1	zinc finger protein 397	Cluster0001
ENSSSCG00000003771	ENSSSCG00000003771	ENSSSCT00000004169, ENSSSCT00000004173, ENSSSCT00000048540, ENSSSCT00000053943, ENSSSCT00000054267, ENSSSCT00000054676, ENSSSCT00000055676	6:135281521-135318714:+1	far upstream element binding protein 1	Cluster0001
ENSSSCG00000003772	ENSSSCG00000003772	ENSSSCT00000004174, ENSSSCT00000041460, ENSSSCT00000042432, ENSSSCT00000042580, ENSSSCT00000055109, ENSSSCT00000061129	6:135606205-135741548:+1	zinc finger ZZ-type containing 3	Cluster0001
ENSSSCG00000003792	ENSSSCG00000003792	ENSSSCT00000004196, ENSSSCT00000049225, ENSSSCT00000065126	6:142668092-142715692:+1	leucine rich repeat containing 40	Cluster0001
ENSSSCG00000003987	ENSSSCG00000003987	ENSSSCT00000004409, ENSSSCT00000052086	6:62300574-62330233:+1	No Class	Cluster0001
ENSSSCG00000003989	ENSSSCG00000003989	ENSSSCT00000004411	6:62368887-62378218:+1	No Class	Cluster0001
ENSSSCG00000003990	ENSSSCG00000003990	ENSSSCT00000004412, ENSSSCT00000046560	6:62496644-62727021:+1	zinc finger protein 671	Cluster0001
ENSSSCG00000004008	ENSSSCG00000004008	ENSSSCT00000004431	1:578465-719928:+1	WD repeat domain 27	Cluster0001
ENSSSCG00000004175	ENSSSCG00000004175	ENSSSCT00000004614	17:38689023-38689416:+1	No Class	Cluster0001
ENSSSCG00000004212	ENSSSCG00000004212	ENSSSCT00000004653	1:35600113-35621314:+1	protein LEG1 homolog	Cluster0001
ENSSSCG00000004253	ENSSSCG00000004253	ENSSSCT00000004701, ENSSSCT00000046257, ENSSSCT00000054920, ENSSSCT00000059612	1:44239364-44287001:+1	golgi associated PDZ and coiled-coil motif containing	Cluster0001
ENSSSCG00000004445	ENSSSCG00000004445	ENSSSCT00000004910	1:82150167-82155098:+1	calcium homeostasis modulator family member 4	Cluster0001
ENSSSCG00000004594	ENSSSCG00000004594	ENSSSCT00000005075	1:113319160-113319551:+1	No Class	Cluster0001
ENSSSCG00000004786	ENSSSCG00000004786	ENSSSCT00000005285	1:131419385-131420067:-1	No Class	Cluster0001
ENSSSCG00000005255	ENSSSCG00000005255	ENSSSCT00000005790, ENSSSCT00000030411, ENSSSCT00000045213, ENSSSCT00000049308, ENSSSCT00000058898	1:223560268-223653368:+1	structural maintenance of chromosomes 5	Cluster0001
ENSSSCG00000005934	ENSSSCG00000005934	ENSSSCT00000006514, ENSSSCT00000006515	4:3070742-3220098:+1	trafficking protein particle complex 9	Cluster0001
ENSSSCG00000006008	ENSSSCG00000006008	ENSSSCT00000006592	4:20663970-20669687:-1	No Class	Cluster0001
ENSSSCG00000006510	ENSSSCG00000006510	ENSSSCT00000007130, ENSSSCT00000028079, ENSSSCT00000029338, ENSSSCT00000029745, ENSSSCT00000057637	4:94161520-94248784:+1	gon-4 like	Cluster0001
ENSSSCG00000006636	ENSSSCG00000006636	ENSSSCT00000007272, ENSSSCT00000042088	4:98120186-98163945:-1	GA binding protein transcription factor subunit beta 2	Cluster0001
ENSSSCG00000006870	ENSSSCG00000006870	ENSSSCT00000007523, ENSSSCT00000023573, ENSSSCT00000040468	4:118024991-118090395:-1	major facilitator superfamily domain containing 14A	Cluster0001
ENSSSCG00000006984	ENSSSCG00000006984	ENSSSCT00000007649, ENSSSCT00000050932, ENSSSCT00000051067, ENSSSCT00000054191, ENSSSCT00000057561	17:4949627-5015621:+1	VPS37A, ESCRT-I subunit	Cluster0001
ENSSSCG00000007047	ENSSSCG00000007047	ENSSSCT00000007716, ENSSSCT00000050038	17:14790344-14837414:+1	minichromosome maintenance 8 homologous recombination repair factor	Cluster0001
ENSSSCG00000008052	ENSSSCG00000008052	ENSSSCT00000008824	3:39666440-39667494:-1	No Class	Cluster0001
ENSSSCG00000008352	ENSSSCG00000008352	ENSSSCT00000009146, ENSSSCT00000043700	3:74067838-74084918:-1	partner of NOB1 homolog	Cluster0001
ENSSSCG00000008383	ENSSSCG00000008383	ENSSSCT00000009179, ENSSSCT00000044873, ENSSSCT00000048895	3:80583777-80615987:-1	activator of HSP90 ATPase homolog 2, pseudogene	Cluster0001
ENSSSCG00000008415	ENSSSCG00000008415	ENSSSCT00000009215	3:87389835-87501290:+1	ankyrin repeat and SOCS box containing 3	Cluster0001
ENSSSCG00000008440	ENSSSCG00000008440	ENSSSCT00000009241	3:93925887-93975100:+1	phosphatidylinositol glycan anchor biosynthesis class F	Cluster0001
ENSSSCG00000008496	ENSSSCG00000008496	ENSSSCT00000034217, ENSSSCT00000050794	3:103041221-103096738:+1	eukaryotic translation initiation factor 2 alpha kinase 2	Cluster0001
ENSSSCG00000008531	ENSSSCG00000008531	ENSSSCT00000009335	18:15431463-15431744:+1	No Class	Cluster0001
ENSSSCG00000008576	ENSSSCG00000008576	ENSSSCT00000009384, ENSSSCT00000038297, ENSSSCT00000048810, ENSSSCT00000054168, ENSSSCT00000057606, ENSSSCT00000065664, ENSSSCT00000066423	3:113229159-113476818:+1	dystrobrevin beta	Cluster0001
ENSSSCG00000008892	ENSSSCG00000008892	ENSSSCT00000009686, ENSSSCT00000009689, ENSSSCT00000009735, ENSSSCT00000054020, ENSSSCT00000061442	8:42180811-42382865:-1	zinc finger protein 493-like	Cluster0001
ENSSSCG00000008990	ENSSSCG00000008990	ENSSSCT00000009847, ENSSSCT00000038257, ENSSSCT00000054176	8:73305439-73414563:+1	mitochondrial ribosomal protein L1	Cluster0001
ENSSSCG00000009126	ENSSSCG00000009126	ENSSSCT00000009993	13:145953917-145954507:-1	No Class	Cluster0001
ENSSSCG00000009341	ENSSSCG00000009341	ENSSSCT00000010237, ENSSSCT00000037915, ENSSSCT00000048618, ENSSSCT00000050581, ENSSSCT00000061265	11:8891335-8997769:-1	NEDD4 binding protein 2 like 2	Cluster0001
ENSSSCG00000009419	ENSSSCG00000009419	ENSSSCT00000010321, ENSSSCT00000058368	11:22231683-22267364:-1	GPALPP motifs containing 1	Cluster0001
ENSSSCG00000009425	ENSSSCG00000009425	ENSSSCT00000010329, ENSSSCT00000037244, ENSSSCT00000052760	11:23143715-23159780:-1	laccase domain containing 1	Cluster0001
ENSSSCG00000009788	ENSSSCG00000009788	ENSSSCT00000010730	14:30069487-30085002:-1	density regulated re-initiation and release factor	Cluster0001
ENSSSCG00000009952	ENSSSCG00000009952	ENSSSCT00000010904	14:42979735-42984889:-1	transmembrane protein 211	Cluster0001
ENSSSCG00000009967	ENSSSCG00000009967	ENSSSCT00000010923, ENSSSCT00000024426	14:45187621-45242360:-1	phosphatidylinositol transfer protein beta	Cluster0001
ENSSSCG00000010440	ENSSSCG00000010440	ENSSSCT00000011425	14:99929448-100023251:+1	phosphatase and tensin homolog	Cluster0001
ENSSSCG00000010674	ENSSSCG00000010674	ENSSSCT00000011675, ENSSSCT00000050717, ENSSSCT00000060922	14:128366145-128402557:-1	family with sequence similarity 204 member A	Cluster0001
ENSSSCG00000010685	ENSSSCG00000010685	ENSSSCT00000011686, ENSSSCT00000040327, ENSSSCT00000041191, ENSSSCT00000041990, ENSSSCT00000055569, ENSSSCT00000064923	14:129441211-129467150:-1	TIA1 cytotoxic granule associated RNA binding protein like 1	Cluster0001
ENSSSCG00000010843	ENSSSCG00000010843	ENSSSCT00000011864, ENSSSCT00000039543	10:11851593-11853815:-1	No Class	Cluster0001
ENSSSCG00000010941	ENSSSCG00000010941	ENSSSCT00000011974, ENSSSCT00000042428, ENSSSCT00000049680, ENSSSCT00000052054	10:26110173-26264030:-1	ERCC excision repair 6 like 2	Cluster0001
ENSSSCG00000011068	ENSSSCG00000011068	ENSSSCT00000012112, ENSSSCT00000030870, ENSSSCT00000038107, ENSSSCT00000058596, ENSSSCT00000062750	10:48644542-48795773:-1	ankyrin repeat domain-containing protein 26	Cluster0001
ENSSSCG00000011081	ENSSSCG00000011081	ENSSSCT00000012128, ENSSSCT00000038173	10:52583492-52596824:-1	BMI1 proto-oncogene, polycomb ring finger	Cluster0001
ENSSSCG00000011493	ENSSSCG00000011493	ENSSSCT00000012576, ENSSSCT00000040902, ENSSSCT00000042772, ENSSSCT00000045012, ENSSSCT00000048532, ENSSSCT00000059028, ENSSSCT00000064610	13:45391196-45508849:+1	ataxin 7	Cluster0001
ENSSSCG00000011506	ENSSSCG00000011506	ENSSSCT00000012592, ENSSSCT00000057487, ENSSSCT00000062691	13:50479263-50504880:-1	ubiquitin like modifier activating enzyme 3	Cluster0001
ENSSSCG00000011632	ENSSSCG00000011632	ENSSSCT00000012730, ENSSSCT00000012733, ENSSSCT00000043793, ENSSSCT00000045991, ENSSSCT00000050444, ENSSSCT00000061217, ENSSSCT00000063129	13:73843805-73901085:-1	nephrocystin 3	Cluster0001
ENSSSCG00000011678	ENSSSCG00000011678	ENSSSCT00000012784	13:83116343-83174532:-1	No Class	Cluster0001
ENSSSCG00000011851	ENSSSCG00000011851	ENSSSCT00000012963, ENSSSCT00000038856, ENSSSCT00000057619	13:134185794-134281086:-1	mucin 20, cell surface associated	Cluster0001
ENSSSCG00000011931	ENSSSCG00000011931	ENSSSCT00000013055, ENSSSCT00000042513, ENSSSCT00000044451	13:147385169-147390366:+1	No Class	Cluster0001
ENSSSCG00000012264	ENSSSCG00000012264	ENSSSCT00000013411, ENSSSCT00000039214, ENSSSCT00000042539, ENSSSCT00000051467, ENSSSCT00000057216	X:41089601-41118904:+1	zinc finger protein 674	Cluster0001
ENSSSCG00000012517	ENSSSCG00000012517	ENSSSCT00000013686	X:84815571-84818686:-1	thymosin beta 15B	Cluster0001
ENSSSCG00000012640	ENSSSCG00000012640	ENSSSCT00000013821	X:101170504-101178970:+1	No Class	Cluster0001
ENSSSCG00000012693	ENSSSCG00000012693	ENSSSCT00000013876, ENSSSCT00000057498, ENSSSCT00000062875, ENSSSCT00000063567	X:110843956-110963522:-1	cancer/testis antigen 55	Cluster0001
ENSSSCG00000012700	ENSSSCG00000012700	ENSSSCT00000013885, ENSSSCT00000013886, ENSSSCT00000052322, ENSSSCT00000059025, ENSSSCT00000061437	X:111370841-111420287:-1	MAP7 domain containing 3	Cluster0001
ENSSSCG00000013715	ENSSSCG00000013715	ENSSSCT00000014980, ENSSSCT00000043253, ENSSSCT00000043841, ENSSSCT00000043900, ENSSSCT00000045265, ENSSSCT00000048932, ENSSSCT00000065087	2:66718077-66853255:+1	zinc finger protein 709-like	Cluster0001
ENSSSCG00000013717	ENSSSCG00000013717	ENSSSCT00000014989, ENSSSCT00000052990	2:70350648-70390717:+1	zinc finger protein 709	Cluster0001
ENSSSCG00000013718	ENSSSCG00000013718	ENSSSCT00000014984, ENSSSCT00000014992, ENSSSCT00000014993, ENSSSCT00000038959, ENSSSCT00000052129	2:66591831-66634720:-1	zinc finger protein 14-like	Cluster0001
ENSSSCG00000014094	ENSSSCG00000014094	ENSSSCT00000015395	2:85890815-85937992:+1	angiogenic factor with G-patch and FHA domains 1	Cluster0001
ENSSSCG00000014161	ENSSSCG00000014161	ENSSSCT00000015470, ENSSSCT00000037024, ENSSSCT00000057953	2:100937214-101292482:-1	KIAA0825 ortholog	Cluster0001
ENSSSCG00000014165	ENSSSCG00000014165	ENSSSCT00000015474, ENSSSCT00000063761	2:102079675-102163939:-1	tetratricopeptide repeat domain 37	Cluster0001
ENSSSCG00000014267	ENSSSCG00000014267	ENSSSCT00000015589, ENSSSCT00000037141, ENSSSCT00000045383, ENSSSCT00000046870, ENSSSCT00000046940, ENSSSCT00000047517, ENSSSCT00000056234, ENSSSCT00000059525, ENSSSCT00000064186	2:133708265-133951406:-1	Rap guanine nucleotide exchange factor 6	Cluster0001
ENSSSCG00000014343	ENSSSCG00000014343	ENSSSCT00000015671, ENSSSCT00000040778, ENSSSCT00000040894, ENSSSCT00000040926, ENSSSCT00000048814, ENSSSCT00000052776, ENSSSCT00000057911, ENSSSCT00000058287, ENSSSCT00000061551, ENSSSCT00000066118	2:141179564-141231658:+1	matrin 3	Cluster0001
ENSSSCG00000014351	ENSSSCG00000014351	ENSSSCT00000015680, ENSSSCT00000056185, ENSSSCT00000065040	2:141341596-141352643:-1	endothelial cell surface expressed chemotaxis and apoptosis regulator	Cluster0001
ENSSSCG00000014949	ENSSSCG00000014949	ENSSSCT00000016308, ENSSSCT00000042245, ENSSSCT00000047839	9:26167401-26215092:+1	mediator complex subunit 17	Cluster0001
ENSSSCG00000014974	ENSSSCG00000014974	ENSSSCT00000016336	3:86972006-86972360:+1	No Class	Cluster0001
ENSSSCG00000015011	ENSSSCG00000015011	ENSSSCT00000016375, ENSSSCT00000057940	9:37006544-37268472:+1	DEAD-box helicase 10	Cluster0001
ENSSSCG00000015305	ENSSSCG00000015305	ENSSSCT00000016677	9:70462515-70490330:+1	GTP binding protein 10	Cluster0001
ENSSSCG00000015313	ENSSSCG00000015313	ENSSSCT00000016686, ENSSSCT00000037162, ENSSSCT00000037393, ENSSSCT00000049748, ENSSSCT00000052895	9:72144530-72185727:-1	KRIT1, ankyrin repeat containing	Cluster0001
ENSSSCG00000015367	ENSSSCG00000015367	ENSSSCT00000016742, ENSSSCT00000058540	9:87114324-87120160:+1	No Class	Cluster0001
ENSSSCG00000015499	ENSSSCG00000015499	ENSSSCT00000016886, ENSSSCT00000023973, ENSSSCT00000053070, ENSSSCT00000059537, ENSSSCT00000060873, ENSSSCT00000062007, ENSSSCT00000063552, ENSSSCT00000066062	9:116402336-117060053:+1	RAB GTPase activating protein 1 like	Cluster0001
ENSSSCG00000015773	ENSSSCG00000015773	ENSSSCT00000017174	15:43954523-43979296:+1	No Class	Cluster0001
ENSSSCG00000015795	ENSSSCG00000015795	ENSSSCT00000017198, ENSSSCT00000025197, ENSSSCT00000061583	15:46493522-46503415:-1	coiled-coil domain containing 110	Cluster0001
ENSSSCG00000016085	ENSSSCG00000016085	ENSSSCT00000017513, ENSSSCT00000053322, ENSSSCT00000055271	15:103454997-103494700:-1	formiminotransferase N-terminal subdomain-containing protein-like	Cluster0001
ENSSSCG00000016195	ENSSSCG00000016195	ENSSSCT00000017636	15:120569623-120570128:-1	No Class	Cluster0001
ENSSSCG00000016509	ENSSSCG00000016509	ENSSSCT00000017974, ENSSSCT00000047032, ENSSSCT00000052365, ENSSSCT00000052423, ENSSSCT00000056034, ENSSSCT00000061653	18:10270429-10332784:-1	putative RNA-binding protein Luc7-like 2	Cluster0001
ENSSSCG00000016597	ENSSSCG00000016597	ENSSSCT00000018070, ENSSSCT00000047604, ENSSSCT00000050143	18:22885671-23022156:+1	protection of telomeres 1	Cluster0001
ENSSSCG00000016650	ENSSSCG00000016650	ENSSSCT00000018128	18:34045825-34074472:+1	No Class	Cluster0001
ENSSSCG00000016651	ENSSSCG00000016651	ENSSSCT00000018129	18:34154379-34154633:-1	No Class	Cluster0001
ENSSSCG00000017038	ENSSSCG00000017038	ENSSSCT00000018551, ENSSSCT00000043377, ENSSSCT00000059849, ENSSSCT00000060022	16:63409697-63450295:+1	PWWP domain containing 2A	Cluster0001
ENSSSCG00000017235	ENSSSCG00000017235	ENSSSCT00000018764, ENSSSCT00000035140, ENSSSCT00000065939	12:6597337-6615768:-1	No Class	Cluster0001
ENSSSCG00000017352	ENSSSCG00000017352	ENSSSCT00000018890	12:18639586-18649729:+1	coiled-coil domain containing 43	Cluster0001
ENSSSCG00000017507	ENSSSCG00000017507	ENSSSCT00000019060	12:22975513-22986846:-1	transcription factor CP2-like protein 1	Cluster0001
ENSSSCG00000017670	ENSSSCG00000017670	ENSSSCT00000019234	12:36111579-36160383:+1	ribosomal protein S6 kinase B1	Cluster0001
ENSSSCG00000020659	ENSSSCG00000020659	ENSSSCT00000062461	1:241875085-241875456:+1	No Class	Cluster0001
ENSSSCG00000020870	ENSSSCG00000020870	ENSSSCT00000030750, ENSSSCT00000039858, ENSSSCT00000052093	9:92445643-92481379:-1	DBF4 zinc finger	Cluster0001
ENSSSCG00000020921	ENSSSCG00000020921	ENSSSCT00000026836	6:135546264-135560226:+1	No Class	Cluster0001
ENSSSCG00000021069	ENSSSCG00000021069	ENSSSCT00000026384, ENSSSCT00000038312, ENSSSCT00000046436, ENSSSCT00000052289, ENSSSCT00000058781	7:22003043-22055233:+1	zinc finger protein 260-like	Cluster0001
ENSSSCG00000021322	ENSSSCG00000021322	ENSSSCT00000027404, ENSSSCT00000042462, ENSSSCT00000054095	X:20221414-20275192:+1	zinc finger protein X-linked	Cluster0001
ENSSSCG00000021380	ENSSSCG00000021380	ENSSSCT00000030409, ENSSSCT00000046083	13:133689758-133747103:+1	UBX domain protein 7	Cluster0001
ENSSSCG00000021757	ENSSSCG00000021757	ENSSSCT00000014982, ENSSSCT00000052537	2:66564534-66576444:-1	zinc finger protein 709-like	Cluster0001
ENSSSCG00000021858	ENSSSCG00000021858	ENSSSCT00000023489	3:81114808-81115017:-1	No Class	Cluster0001
ENSSSCG00000022130	ENSSSCG00000022130	ENSSSCT00000026639	1:271344580-271345458:-1	No Class	Cluster0001
ENSSSCG00000022423	ENSSSCG00000022423	ENSSSCT00000030595, ENSSSCT00000052694	6:46259501-46282772:+1	No Class	Cluster0001
ENSSSCG00000022462	ENSSSCG00000022462	ENSSSCT00000030301, ENSSSCT00000056805	13:27818990-27828351:-1	zinc finger protein with KRAB and SCAN domains 7	Cluster0001
ENSSSCG00000022466	ENSSSCG00000022466	ENSSSCT00000025016	3:25239062-25245917:+1	ERI1 exoribonuclease family member 2	Cluster0001
ENSSSCG00000022634	ENSSSCG00000022634	ENSSSCT00000030978, ENSSSCT00000047541, ENSSSCT00000051109, ENSSSCT00000051361, ENSSSCT00000056155	2:66480292-66540349:-1	zinc finger protein 709-like	Cluster0001
ENSSSCG00000022640	ENSSSCG00000022640	ENSSSCT00000025827	13:28868395-28868721:-1	No Class	Cluster0001
ENSSSCG00000023323	ENSSSCG00000023323	ENSSSCT00000029891	2:9084277-9091616:+1	chromosome 2 C11orf98 homolog	Cluster0001
ENSSSCG00000023324	ENSSSCG00000023324	ENSSSCT00000030447, ENSSSCT00000041538, ENSSSCT00000055636, ENSSSCT00000063432, ENSSSCT00000066282	9:45743478-45823883:+1	lysine methyltransferase 2A	Cluster0001
ENSSSCG00000023560	ENSSSCG00000023560	ENSSSCT00000030704	14:134134831-134154652:-1	EEF1A lysine methyltransferase 2	Cluster0001
ENSSSCG00000023596	ENSSSCG00000023596	ENSSSCT00000027466, ENSSSCT00000039466, ENSSSCT00000040019, ENSSSCT00000046214, ENSSSCT00000054331, ENSSSCT00000057351, ENSSSCT00000058609, ENSSSCT00000065708	14:60998430-61030598:-1	zinc finger protein 33B	Cluster0001
ENSSSCG00000023757	ENSSSCG00000023757	ENSSSCT00000026904	16:52264641-52265157:+1	No Class	Cluster0001
ENSSSCG00000023850	ENSSSCG00000023850	ENSSSCT00000028067	9:76699563-76772365:+1	succinate dehydrogenase complex assembly factor 3	Cluster0001
ENSSSCG00000023865	ENSSSCG00000023865	ENSSSCT00000027406	14:132509944-132523100:-1	uncharacterized protein C10orf88	Cluster0001
ENSSSCG00000023976	ENSSSCG00000023976	ENSSSCT00000028544, ENSSSCT00000052044	5:68922437-68976007:-1	decapping mRNA 1B	Cluster0001
ENSSSCG00000024113	ENSSSCG00000024113	ENSSSCT00000049314	6:60685337-60688631:+1	No Class	Cluster0001
ENSSSCG00000024486	ENSSSCG00000024486	ENSSSCT00000031247, ENSSSCT00000042749, ENSSSCT00000046572, ENSSSCT00000062728	17:11817942-11902266:+1	hook microtubule tethering protein 3	Cluster0001
ENSSSCG00000024618	ENSSSCG00000024618	ENSSSCT00000032380	10:19936211-19968960:+1	F-box protein 28	Cluster0001
ENSSSCG00000024663	ENSSSCG00000024663	ENSSSCT00000029496	13:146411280-146468318:+1	spindle and centriole associated protein 1	Cluster0001
ENSSSCG00000024825	ENSSSCG00000024825	ENSSSCT00000024558	6:91716165-91716996:+1	No Class	Cluster0001
ENSSSCG00000025007	ENSSSCG00000025007	ENSSSCT00000027178	3:72983124-73013823:+1	NFU1 iron-sulfur cluster scaffold	Cluster0001
ENSSSCG00000025028	ENSSSCG00000025028	ENSSSCT00000029211, ENSSSCT00000037928, ENSSSCT00000054695, ENSSSCT00000056305, ENSSSCT00000057452	X:101399374-101440034:+1	X-linked inhibitor of apoptosis	Cluster0001
ENSSSCG00000025041	ENSSSCG00000025041	ENSSSCT00000023480, ENSSSCT00000052906	5:104510587-104525997:+1	rab-like protein 2A	Cluster0001
ENSSSCG00000025209	ENSSSCG00000025209	ENSSSCT00000031739	6:120675906-120711203:+1	No Class	Cluster0001
ENSSSCG00000025590	ENSSSCG00000025590	ENSSSCT00000003241, ENSSSCT00000003256, ENSSSCT00000003259	6:46541828-46555683:-1	No Class	Cluster0001
ENSSSCG00000026045	ENSSSCG00000026045	ENSSSCT00000030766, ENSSSCT00000059329	6:60759168-60773371:+1	zinc finger protein OZF	Cluster0001
ENSSSCG00000026719	ENSSSCG00000026719	ENSSSCT00000029447	5:40416335-40423016:-1	ALG10, alpha-1,2-glucosyltransferase	Cluster0001
ENSSSCG00000026960	ENSSSCG00000026960	ENSSSCT00000028724, ENSSSCT00000040424, ENSSSCT00000040591, ENSSSCT00000043281, ENSSSCT00000053154, ENSSSCT00000054455, ENSSSCT00000054572, ENSSSCT00000064595	1:115219883-115345923:+1	zinc finger protein 280D	Cluster0001
ENSSSCG00000026961	ENSSSCG00000026961	ENSSSCT00000003239, ENSSSCT00000050731	6:46823973-46842870:+1	zinc finger protein 607-like	Cluster0001
ENSSSCG00000027007	ENSSSCG00000027007	ENSSSCT00000031445	6:96893571-96912389:+1	centrosomal protein 76	Cluster0001
ENSSSCG00000027086	ENSSSCG00000027086	ENSSSCT00000031747, ENSSSCT00000044079	8:104548524-104553901:-1	No Class	Cluster0001
ENSSSCG00000027115	ENSSSCG00000027115	ENSSSCT00000032456, ENSSSCT00000045081, ENSSSCT00000052748, ENSSSCT00000053799	X:57382500-57466705:+1	TATA-box binding protein associated factor 1	Cluster0001
ENSSSCG00000027232	ENSSSCG00000027232	ENSSSCT00000030120, ENSSSCT00000030424, ENSSSCT00000048040, ENSSSCT00000059099, ENSSSCT00000059822, ENSSSCT00000059833	1:137199072-137297207:-1	family with sequence similarity 169 member B	Cluster0001
ENSSSCG00000027301	ENSSSCG00000027301	ENSSSCT00000024934	8:55219313-55219886:-1	No Class	Cluster0001
ENSSSCG00000027329	ENSSSCG00000027329	ENSSSCT00000029089, ENSSSCT00000049606	14:85574901-85575574:-1	No Class	Cluster0001
ENSSSCG00000027429	ENSSSCG00000027429	ENSSSCT00000024439, ENSSSCT00000062299	5:41561558-41584232:+1	tyrosyl-tRNA synthetase 2	Cluster0001
ENSSSCG00000027556	ENSSSCG00000027556	ENSSSCT00000027533, ENSSSCT00000049563	13:97893520-98333630:+1	arginine and serine rich coiled-coil 1	Cluster0001
ENSSSCG00000027675	ENSSSCG00000027675	ENSSSCT00000012602, ENSSSCT00000022793, ENSSSCT00000053409, ENSSSCT00000053905, ENSSSCT00000064840	13:52348094-52974267:-1	forkhead box P1	Cluster0001
ENSSSCG00000027718	ENSSSCG00000027718	ENSSSCT00000009502, ENSSSCT00000026057, ENSSSCT00000038830, ENSSSCT00000040746, ENSSSCT00000055426	8:1184845-1198526:-1	HAUS augmin like complex subunit 3	Cluster0001
ENSSSCG00000027741	ENSSSCG00000027741	ENSSSCT00000022365, ENSSSCT00000060336	6:57038063-57073957:+1	zinc finger protein 665-like	Cluster0001
ENSSSCG00000027974	ENSSSCG00000027974	ENSSSCT00000024573	1:243100362-243106781:-1	mitochondrial ribosomal protein L50	Cluster0001
ENSSSCG00000028005	ENSSSCG00000028005	ENSSSCT00000030351, ENSSSCT00000048816	14:30468977-30496742:+1	VPS33A, CORVET/HOPS core subunit	Cluster0001
ENSSSCG00000028345	ENSSSCG00000028345	ENSSSCT00000023762, ENSSSCT00000025281, ENSSSCT00000029648	14:60884782-60905183:-1	zinc finger protein 33B	Cluster0001
ENSSSCG00000028382	ENSSSCG00000028382	ENSSSCT00000030170	2:143067729-143071262:+1	No Class	Cluster0001
ENSSSCG00000028663	ENSSSCG00000028663	ENSSSCT00000032106	7:96447235-96471315:+1	No Class	Cluster0001
ENSSSCG00000028677	ENSSSCG00000028677	ENSSSCT00000032455, ENSSSCT00000045058, ENSSSCT00000065887	13:157504281-157522344:-1	tRNA methyltransferase 10C, mitochondrial RNase P subunit	Cluster0001
ENSSSCG00000028737	ENSSSCG00000028737	ENSSSCT00000005040, ENSSSCT00000029412, ENSSSCT00000031114, ENSSSCT00000055085	1:108414360-108515548:-1	ubiquitin specific peptidase 3	Cluster0001
ENSSSCG00000028786	ENSSSCG00000028786	ENSSSCT00000023904	16:47658162-47688397:+1	general transcription factor IIH subunit 2	Cluster0001
ENSSSCG00000029035	ENSSSCG00000029035	ENSSSCT00000022409, ENSSSCT00000049029, ENSSSCT00000059728	2:70576977-70605449:-1	zinc finger protein 558	Cluster0001
ENSSSCG00000029696	ENSSSCG00000029696	ENSSSCT00000029899, ENSSSCT00000062819	6:62294949-62330236:+1	zinc finger protein 211	Cluster0001
ENSSSCG00000030131	ENSSSCG00000030131	ENSSSCT00000026762	7:51929381-51935725:+1	chromosome 7 C15orf40 homolog	Cluster0001
ENSSSCG00000030248	ENSSSCG00000030248	ENSSSCT00000028671, ENSSSCT00000063764	6:109190365-109190917:+1	No Class	Cluster0001
ENSSSCG00000030414	ENSSSCG00000030414	ENSSSCT00000031370, ENSSSCT00000049251	15:31106303-31110097:+1	No Class	Cluster0001
ENSSSCG00000030951	ENSSSCG00000030951	ENSSSCT00000034077	X:93925747-93926194:+1	No Class	Cluster0001
ENSSSCG00000030971	ENSSSCG00000030971	ENSSSCT00000035978, ENSSSCT00000062220	17:55603258-55608615:-1	No Class	Cluster0001
ENSSSCG00000031197	ENSSSCG00000031197	ENSSSCT00000040715	3:22784008-22785218:+1	No Class	Cluster0001
ENSSSCG00000031281	ENSSSCG00000031281	ENSSSCT00000042282, ENSSSCT00000054915, ENSSSCT00000064252, ENSSSCT00000064373	4:45434596-45671964:-1	No Class	Cluster0001
ENSSSCG00000031317	ENSSSCG00000031317	ENSSSCT00000060882	10:46868564-46871628:+1	No Class	Cluster0001
ENSSSCG00000031327	ENSSSCG00000031327	ENSSSCT00000052761	1:216929832-216931321:-1	No Class	Cluster0001
ENSSSCG00000031351	ENSSSCG00000031351	ENSSSCT00000061431	17:4758290-4759161:-1	No Class	Cluster0001
ENSSSCG00000031385	ENSSSCG00000031385	ENSSSCT00000039251	11:6698577-6702494:+1	No Class	Cluster0001
ENSSSCG00000031395	ENSSSCG00000031395	ENSSSCT00000042443	13:35429531-35434132:-1	No Class	Cluster0001
ENSSSCG00000031479	ENSSSCG00000031479	ENSSSCT00000064978	11:51338513-51338710:-1	No Class	Cluster0001
ENSSSCG00000031501	ENSSSCG00000031501	ENSSSCT00000059815	2:49341216-49342160:-1	No Class	Cluster0001
ENSSSCG00000031524	ENSSSCG00000031524	ENSSSCT00000032043	13:150186763-150204369:+1	developmental pluripotency associated 2	Cluster0001
ENSSSCG00000031655	ENSSSCG00000031655	ENSSSCT00000041560	12:45871598-45871840:-1	No Class	Cluster0001
ENSSSCG00000031656	ENSSSCG00000031656	ENSSSCT00000041434, ENSSSCT00000053755	3:125448531-125453386:-1	No Class	Cluster0001
ENSSSCG00000031677	ENSSSCG00000031677	ENSSSCT00000049524	17:8965937-8971000:-1	No Class	Cluster0001
ENSSSCG00000031722	ENSSSCG00000031722	ENSSSCT00000054447	5:21076909-21078789:+1	olfactory receptor 2AP1-like	Cluster0001
ENSSSCG00000031730	ENSSSCG00000031730	ENSSSCT00000042461, ENSSSCT00000055286	6:96877429-96893434:-1	proteasome assembly chaperone 2	Cluster0001
ENSSSCG00000031734	ENSSSCG00000031734	ENSSSCT00000036948	9:92312987-92314223:-1	No Class	Cluster0001
ENSSSCG00000031738	ENSSSCG00000031738	ENSSSCT00000066185	4:130208451-130242371:+1	No Class	Cluster0001
ENSSSCG00000031754	ENSSSCG00000031754	ENSSSCT00000057919	17:22592121-22593299:+1	No Class	Cluster0001
ENSSSCG00000031770	ENSSSCG00000031770	ENSSSCT00000041154, ENSSSCT00000047622	5:42393558-42396191:-1	No Class	Cluster0001
ENSSSCG00000031774	ENSSSCG00000031774	ENSSSCT00000025688, ENSSSCT00000044336, ENSSSCT00000054725, ENSSSCT00000055535, ENSSSCT00000056943, ENSSSCT00000059576, ENSSSCT00000064772	6:62388324-62486808:-1	putative uncharacterized zinc finger protein 814	Cluster0001
ENSSSCG00000031827	ENSSSCG00000031827	ENSSSCT00000055607	9:72114292-72114855:+1	No Class	Cluster0001
ENSSSCG00000031871	ENSSSCG00000031871	ENSSSCT00000043918, ENSSSCT00000064834	14:7565612-7604471:-1	ectonucleoside triphosphate diphosphohydrolase 4	Cluster0001
ENSSSCG00000031951	ENSSSCG00000031951	ENSSSCT00000039855	15:32172618-32178103:+1	No Class	Cluster0001
ENSSSCG00000031979	ENSSSCG00000031979	ENSSSCT00000053325	9:12442414-12451687:-1	potassium channel tetramerization domain containing 14	Cluster0001
ENSSSCG00000031983	ENSSSCG00000031983	ENSSSCT00000066347	18:8935808-8939331:-1	No Class	Cluster0001
ENSSSCG00000032023	ENSSSCG00000032023	ENSSSCT00000045977, ENSSSCT00000047339, ENSSSCT00000048854	6:57389541-57411363:-1	No Class	Cluster0001
ENSSSCG00000032098	ENSSSCG00000032098	ENSSSCT00000050306	6:53686094-53693386:+1	zinc finger protein 664-like	Cluster0001
ENSSSCG00000032113	ENSSSCG00000032113	ENSSSCT00000003612, ENSSSCT00000038605, ENSSSCT00000046646, ENSSSCT00000047274, ENSSSCT00000048021, ENSSSCT00000048583, ENSSSCT00000049154, ENSSSCT00000054185, ENSSSCT00000055598, ENSSSCT00000060045	6:56304681-56381217:-1	cationic amino acid transporter 3-like	Cluster0001
ENSSSCG00000032114	ENSSSCG00000032114	ENSSSCT00000048647	1:56068691-56069048:-1	No Class	Cluster0001
ENSSSCG00000032142	ENSSSCG00000032142	ENSSSCT00000037294	3:107864617-107904494:-1	No Class	Cluster0001
ENSSSCG00000032160	ENSSSCG00000032160	ENSSSCT00000040691	4:111320261-111328271:-1	No Class	Cluster0001
ENSSSCG00000032168	ENSSSCG00000032168	ENSSSCT00000057834, ENSSSCT00000065987	13:140740622-140745642:+1	No Class	Cluster0001
ENSSSCG00000032185	ENSSSCG00000032185	ENSSSCT00000049883	3:6129397-6129618:+1	No Class	Cluster0001
ENSSSCG00000032196	ENSSSCG00000032196	ENSSSCT00000037046, ENSSSCT00000041476, ENSSSCT00000062348	6:61836686-61907723:+1	zinc finger protein 17-like	Cluster0001
ENSSSCG00000032214	ENSSSCG00000032214	ENSSSCT00000054675, ENSSSCT00000059603	1:152593651-152636635:-1	suppressor of cytokine signaling 6	Cluster0001
ENSSSCG00000032236	ENSSSCG00000032236	ENSSSCT00000062148	1:105074795-105079597:-1	No Class	Cluster0001
ENSSSCG00000032238	ENSSSCG00000032238	ENSSSCT00000053060	2:137489427-137493321:-1	No Class	Cluster0001
ENSSSCG00000032255	ENSSSCG00000032255	ENSSSCT00000061428	1:249988794-249995755:-1	No Class	Cluster0001
ENSSSCG00000032297	ENSSSCG00000032297	ENSSSCT00000036761, ENSSSCT00000038193, ENSSSCT00000047268, ENSSSCT00000047710, ENSSSCT00000050352, ENSSSCT00000050857, ENSSSCT00000052997, ENSSSCT00000057613, ENSSSCT00000065280	1:261133231-261229288:+1	centriolin	Cluster0001
ENSSSCG00000032311	ENSSSCG00000032311	ENSSSCT00000017585, ENSSSCT00000048863	15:112723344-112745892:+1	ribulose-5-phosphate-3-epimerase	Cluster0001
ENSSSCG00000032352	ENSSSCG00000032352	ENSSSCT00000047540, ENSSSCT00000049623, ENSSSCT00000055462, ENSSSCT00000058739, ENSSSCT00000065732	6:62620057-62643090:+1	zinc finger protein 256	Cluster0001
ENSSSCG00000032418	ENSSSCG00000032418	ENSSSCT00000040305	16:28108424-28108925:-1	No Class	Cluster0001
ENSSSCG00000032461	ENSSSCG00000032461	ENSSSCT00000057274	6:63012520-63012915:+1	No Class	Cluster0001
ENSSSCG00000032495	ENSSSCG00000032495	ENSSSCT00000048858	18:7573633-7578532:-1	No Class	Cluster0001
ENSSSCG00000032554	ENSSSCG00000032554	ENSSSCT00000065547	1:238641670-238642785:-1	solute carrier family 25 member 51	Cluster0001
ENSSSCG00000032565	ENSSSCG00000032565	ENSSSCT00000037904	6:91286496-91289893:+1	No Class	Cluster0001
ENSSSCG00000032671	ENSSSCG00000032671	ENSSSCT00000058670	12:16230009-16235068:+1	No Class	Cluster0001
ENSSSCG00000032736	ENSSSCG00000032736	ENSSSCT00000045587, ENSSSCT00000047266, ENSSSCT00000049816, ENSSSCT00000056715, ENSSSCT00000064235	X:41200707-41731258:+1	No Class	Cluster0001
ENSSSCG00000032747	ENSSSCG00000032747	ENSSSCT00000063765	14:40414028-40423782:+1	glutamyl-tRNA amidotransferase subunit C	Cluster0001
ENSSSCG00000032765	ENSSSCG00000032765	ENSSSCT00000058447, ENSSSCT00000061475	2:61741068-61760025:-1	cytochrome P450, family 4, subfamily F, polypeptide 2	Cluster0001
ENSSSCG00000032840	ENSSSCG00000032840	ENSSSCT00000042226	5:20600905-20602673:+1	olfactory receptor 6C3-like	Cluster0001
ENSSSCG00000032879	ENSSSCG00000032879	ENSSSCT00000064422, ENSSSCT00000065963	1:108567270-108568865:-1	No Class	Cluster0001
ENSSSCG00000032881	ENSSSCG00000032881	ENSSSCT00000061322	AEMK02000512.1:4780-9106:+1	No Class	Cluster0001
ENSSSCG00000032894	ENSSSCG00000032894	ENSSSCT00000037946, ENSSSCT00000038327, ENSSSCT00000050565, ENSSSCT00000059416	AEMK02000641.1:17658-64160:+1	TBC1 domain family member 14-like	Cluster0001
ENSSSCG00000032951	ENSSSCG00000032951	ENSSSCT00000059174, ENSSSCT00000064329	7:58130695-58135377:-1	No Class	Cluster0001
ENSSSCG00000032961	ENSSSCG00000032961	ENSSSCT00000046179	3:24786516-24807129:-1	No Class	Cluster0001
ENSSSCG00000032966	ENSSSCG00000032966	ENSSSCT00000057296	2:75161459-75185284:-1	No Class	Cluster0001
ENSSSCG00000032969	ENSSSCG00000032969	ENSSSCT00000003604, ENSSSCT00000045748, ENSSSCT00000048196, ENSSSCT00000050476	6:58189335-58201899:+1	zinc finger protein 84-like	Cluster0001
ENSSSCG00000032975	ENSSSCG00000032975	ENSSSCT00000062991	14:82099487-82100569:-1	No Class	Cluster0001
ENSSSCG00000032978	ENSSSCG00000032978	ENSSSCT00000052214, ENSSSCT00000058425, ENSSSCT00000065556	6:56998692-57024232:+1	zinc finger protein OZF-like	Cluster0001
ENSSSCG00000033022	ENSSSCG00000033022	ENSSSCT00000048954	2:16033622-16035451:-1	No Class	Cluster0001
ENSSSCG00000033069	ENSSSCG00000033069	ENSSSCT00000044680	AEMK02000204.1:16038-136086:+1	multidrug resistance-associated protein 4-like	Cluster0001
ENSSSCG00000033104	ENSSSCG00000033104	ENSSSCT00000037557, ENSSSCT00000047295, ENSSSCT00000053062, ENSSSCT00000054969, ENSSSCT00000055861, ENSSSCT00000058479, ENSSSCT00000060089, ENSSSCT00000062483, ENSSSCT00000064493, ENSSSCT00000065170	7:76929473-77221300:-1	uncharacterized LOC106504483	Cluster0001
ENSSSCG00000033138	ENSSSCG00000033138	ENSSSCT00000037309	13:146235657-146238662:-1	No Class	Cluster0001
ENSSSCG00000033159	ENSSSCG00000033159	ENSSSCT00000049469	9:51338609-51338855:+1	No Class	Cluster0001
ENSSSCG00000033197	ENSSSCG00000033197	ENSSSCT00000047418	1:129675106-129675291:+1	No Class	Cluster0001
ENSSSCG00000033232	ENSSSCG00000033232	ENSSSCT00000057365	6:61800671-61810505:-1	zinc finger protein OZF-like	Cluster0001
ENSSSCG00000033240	ENSSSCG00000033240	ENSSSCT00000058073	13:30692188-30694292:+1	No Class	Cluster0001
ENSSSCG00000033241	ENSSSCG00000033241	ENSSSCT00000048011	15:16887762-16893076:-1	No Class	Cluster0001
ENSSSCG00000033271	ENSSSCG00000033271	ENSSSCT00000058444	9:51337178-51338098:+1	No Class	Cluster0001
ENSSSCG00000033281	ENSSSCG00000033281	ENSSSCT00000056649	3:106922744-106923404:+1	No Class	Cluster0001
ENSSSCG00000033296	ENSSSCG00000033296	ENSSSCT00000037230	2:137490310-137491003:-1	No Class	Cluster0001
ENSSSCG00000033302	ENSSSCG00000033302	ENSSSCT00000063767	12:27436493-27459772:-1	No Class	Cluster0001
ENSSSCG00000033312	ENSSSCG00000033312	ENSSSCT00000041162	4:33414360-33478732:-1	No Class	Cluster0001
ENSSSCG00000033338	ENSSSCG00000033338	ENSSSCT00000043928	4:100700297-100702788:-1	No Class	Cluster0001
ENSSSCG00000033340	ENSSSCG00000033340	ENSSSCT00000046485, ENSSSCT00000048174, ENSSSCT00000056336, ENSSSCT00000059195, ENSSSCT00000063394, ENSSSCT00000063720, ENSSSCT00000064168	6:61558393-61643907:+1	zinc finger protein 264-like	Cluster0001
ENSSSCG00000033351	ENSSSCG00000033351	ENSSSCT00000038641, ENSSSCT00000049206	6:62003270-62016533:+1	zinc finger protein OZF-like	Cluster0001
ENSSSCG00000033379	ENSSSCG00000033379	ENSSSCT00000065754	14:31180280-31181772:-1	No Class	Cluster0001
ENSSSCG00000033388	ENSSSCG00000033388	ENSSSCT00000039679, ENSSSCT00000051962, ENSSSCT00000063791	2:66449007-66499957:-1	No Class	Cluster0001
ENSSSCG00000033421	ENSSSCG00000033421	ENSSSCT00000053147	12:16291733-16308522:-1	methyltransferase like 2A	Cluster0001
ENSSSCG00000033472	ENSSSCG00000033472	ENSSSCT00000059767	1:129131216-129131431:-1	No Class	Cluster0001
ENSSSCG00000033555	ENSSSCG00000033555	ENSSSCT00000051673	7:113797561-113800875:+1	No Class	Cluster0001
ENSSSCG00000033601	ENSSSCG00000033601	ENSSSCT00000054649	6:62205214-62230947:-1	zinc finger protein 211-like	Cluster0001
ENSSSCG00000033617	ENSSSCG00000033617	ENSSSCT00000048834	1:168427513-168429874:+1	No Class	Cluster0001
ENSSSCG00000033645	ENSSSCG00000033645	ENSSSCT00000062673	4:93177170-93179068:+1	No Class	Cluster0001
ENSSSCG00000033647	ENSSSCG00000033647	ENSSSCT00000054844	7:13867734-13919401:-1	No Class	Cluster0001
ENSSSCG00000033664	ENSSSCG00000033664	ENSSSCT00000041408	2:102421587-102457565:+1	No Class	Cluster0001
ENSSSCG00000033746	ENSSSCG00000033746	ENSSSCT00000057510	8:43921204-43922117:+1	No Class	Cluster0001
ENSSSCG00000033766	ENSSSCG00000033766	ENSSSCT00000044390	5:42566351-42576030:-1	electron transfer flavoprotein subunit beta lysine methyltransferase	Cluster0001
ENSSSCG00000033804	ENSSSCG00000033804	ENSSSCT00000053101	1:269008363-269009987:+1	No Class	Cluster0001
ENSSSCG00000033871	ENSSSCG00000033871	ENSSSCT00000044544	8:83353254-83428674:+1	anaphase promoting complex subunit 10	Cluster0001
ENSSSCG00000033882	ENSSSCG00000033882	ENSSSCT00000063180	4:18598948-18651536:-1	No Class	Cluster0001
ENSSSCG00000033884	ENSSSCG00000033884	ENSSSCT00000045261	13:162720267-162721322:+1	No Class	Cluster0001
ENSSSCG00000033901	ENSSSCG00000033901	ENSSSCT00000037604	3:29567280-29567610:-1	No Class	Cluster0001
ENSSSCG00000033937	ENSSSCG00000033937	ENSSSCT00000054964, ENSSSCT00000055891	9:33721060-33770390:+1	No Class	Cluster0001
ENSSSCG00000033942	ENSSSCG00000033942	ENSSSCT00000064479	9:7970737-7971485:-1	No Class	Cluster0001
ENSSSCG00000033951	ENSSSCG00000033951	ENSSSCT00000056177	13:128580861-128593891:-1	No Class	Cluster0001
ENSSSCG00000033964	ENSSSCG00000033964	ENSSSCT00000056590, ENSSSCT00000063882	8:40804217-40806420:+1	No Class	Cluster0001
ENSSSCG00000033966	ENSSSCG00000033966	ENSSSCT00000048724	13:74801077-74805255:+1	No Class	Cluster0001
ENSSSCG00000033992	ENSSSCG00000033992	ENSSSCT00000045889, ENSSSCT00000064070	2:51302359-51306531:-1	No Class	Cluster0001
ENSSSCG00000034029	ENSSSCG00000034029	ENSSSCT00000055630	11:25577264-25577651:+1	No Class	Cluster0001
ENSSSCG00000034038	ENSSSCG00000034038	ENSSSCT00000051450, ENSSSCT00000054911	AEMK02000189.1:80083-80743:+1	isopentenyl-diphosphate Delta-isomerase 1-like	Cluster0001
ENSSSCG00000034104	ENSSSCG00000034104	ENSSSCT00000066040	3:52536399-52536630:-1	No Class	Cluster0001
ENSSSCG00000034110	ENSSSCG00000034110	ENSSSCT00000063289	7:77432711-77436843:-1	No Class	Cluster0001
ENSSSCG00000034193	ENSSSCG00000034193	ENSSSCT00000054841	15:81714586-81789534:+1	No Class	Cluster0001
ENSSSCG00000034223	ENSSSCG00000034223	ENSSSCT00000064903	3:31466874-31470623:+1	No Class	Cluster0001
ENSSSCG00000034267	ENSSSCG00000034267	ENSSSCT00000046337	15:39406059-39718205:+1	No Class	Cluster0001
ENSSSCG00000034280	ENSSSCG00000034280	ENSSSCT00000042415, ENSSSCT00000048188, ENSSSCT00000049359, ENSSSCT00000053780, ENSSSCT00000054210, ENSSSCT00000061266, ENSSSCT00000064472	8:96751303-96856344:-1	La ribonucleoprotein domain family member 1B	Cluster0001
ENSSSCG00000034283	ENSSSCG00000034283	ENSSSCT00000053374	2:8280373-8320348:+1	No Class	Cluster0001
ENSSSCG00000034322	ENSSSCG00000034322	ENSSSCT00000053330	6:169102897-169119916:-1	No Class	Cluster0001
ENSSSCG00000034352	ENSSSCG00000034352	ENSSSCT00000045108	1:121186406-121190883:-1	No Class	Cluster0001
ENSSSCG00000034355	ENSSSCG00000034355	ENSSSCT00000059960	8:42099871-42103291:+1	No Class	Cluster0001
ENSSSCG00000034366	ENSSSCG00000034366	ENSSSCT00000061815	1:121400072-121400711:+1	No Class	Cluster0001
ENSSSCG00000034437	ENSSSCG00000034437	ENSSSCT00000045593	X:3905567-3907829:-1	No Class	Cluster0001
ENSSSCG00000034526	ENSSSCG00000034526	ENSSSCT00000052946	2:120035581-120035763:+1	No Class	Cluster0001
ENSSSCG00000034537	ENSSSCG00000034537	ENSSSCT00000041456	18:8160120-8162247:+1	No Class	Cluster0001
ENSSSCG00000034540	ENSSSCG00000034540	ENSSSCT00000041056, ENSSSCT00000064528	6:57089528-57129251:-1	protein ZNF738-like	Cluster0001
ENSSSCG00000034541	ENSSSCG00000034541	ENSSSCT00000055654	1:263878219-263879207:-1	No Class	Cluster0001
ENSSSCG00000034555	ENSSSCG00000034555	ENSSSCT00000040812, ENSSSCT00000043848	5:62106284-62124604:+1	killer cell lectin-like receptor subfamily B member 1B allele B	Cluster0001
ENSSSCG00000034629	ENSSSCG00000034629	ENSSSCT00000041319	3:11897899-11899312:-1	No Class	Cluster0001
ENSSSCG00000034649	ENSSSCG00000034649	ENSSSCT00000041839	16:32937475-32937965:-1	No Class	Cluster0001
ENSSSCG00000034665	ENSSSCG00000034665	ENSSSCT00000055800	13:38542781-38544856:+1	No Class	Cluster0001
ENSSSCG00000034683	ENSSSCG00000034683	ENSSSCT00000063070	6:85440301-85443762:-1	No Class	Cluster0001
ENSSSCG00000034699	ENSSSCG00000034699	ENSSSCT00000041654	14:29769028-29769550:-1	No Class	Cluster0001
ENSSSCG00000034700	ENSSSCG00000034700	ENSSSCT00000058377	1:253085143-253090283:+1	No Class	Cluster0001
ENSSSCG00000034711	ENSSSCG00000034711	ENSSSCT00000062054	13:133625754-133654122:+1	ring finger protein 168	Cluster0001
ENSSSCG00000034731	ENSSSCG00000034731	ENSSSCT00000050770, ENSSSCT00000057760	13:205686685-205691882:-1	trefoil factor 1	Cluster0001
ENSSSCG00000034747	ENSSSCG00000034747	ENSSSCT00000065176	3:93902674-93907681:-1	No Class	Cluster0001
ENSSSCG00000034788	ENSSSCG00000034788	ENSSSCT00000059902	15:72498282-72504723:+1	No Class	Cluster0001
ENSSSCG00000034793	ENSSSCG00000034793	ENSSSCT00000041519	10:68666912-68667587:-1	No Class	Cluster0001
ENSSSCG00000034805	ENSSSCG00000034805	ENSSSCT00000039707, ENSSSCT00000044649, ENSSSCT00000057341	2:70370699-70372586:-1	No Class	Cluster0001
ENSSSCG00000034843	ENSSSCG00000034843	ENSSSCT00000053535	5:13598-24198:+1	RAB, member of RAS oncogene family like 2B	Cluster0001
ENSSSCG00000034844	ENSSSCG00000034844	ENSSSCT00000057828	14:55818830-55880995:-1	tubulin folding cofactor E	Cluster0001
ENSSSCG00000034878	ENSSSCG00000034878	ENSSSCT00000037663, ENSSSCT00000057316	3:43929745-43930249:-1	No Class	Cluster0001
ENSSSCG00000034950	ENSSSCG00000034950	ENSSSCT00000064055	X:60212242-60212414:+1	No Class	Cluster0001
ENSSSCG00000035056	ENSSSCG00000035056	ENSSSCT00000064646	14:63784248-63786016:+1	No Class	Cluster0001
ENSSSCG00000035060	ENSSSCG00000035060	ENSSSCT00000054790	8:103028687-103032398:-1	No Class	Cluster0001
ENSSSCG00000035099	ENSSSCG00000035099	ENSSSCT00000051419, ENSSSCT00000062329	4:129425768-129453966:-1	No Class	Cluster0001
ENSSSCG00000035142	ENSSSCG00000035142	ENSSSCT00000050755, ENSSSCT00000061494	8:53738862-53761213:+1	zinc finger protein 525-like	Cluster0001
ENSSSCG00000035150	ENSSSCG00000035150	ENSSSCT00000056274	2:74800137-74802666:+1	No Class	Cluster0001
ENSSSCG00000035154	ENSSSCG00000035154	ENSSSCT00000040486	3:16673866-16704543:+1	No Class	Cluster0001
ENSSSCG00000035217	ENSSSCG00000035217	ENSSSCT00000052642	X:20589794-20724712:+1	No Class	Cluster0001
ENSSSCG00000035345	ENSSSCG00000035345	ENSSSCT00000042175	9:36381808-36383253:+1	No Class	Cluster0001
ENSSSCG00000035350	ENSSSCG00000035350	ENSSSCT00000038554	7:57152110-57194404:+1	No Class	Cluster0001
ENSSSCG00000035363	ENSSSCG00000035363	ENSSSCT00000040090, ENSSSCT00000052159	11:68192980-68193949:-1	No Class	Cluster0001
ENSSSCG00000035527	ENSSSCG00000035527	ENSSSCT00000062520	6:62597613-62615310:+1	zinc finger protein 256-like	Cluster0001
ENSSSCG00000035541	ENSSSCG00000035541	ENSSSCT00000051128	17:26890465-26891020:-1	No Class	Cluster0001
ENSSSCG00000035613	ENSSSCG00000035613	ENSSSCT00000038225, ENSSSCT00000059492, ENSSSCT00000063377	5:78060687-78064315:+1	No Class	Cluster0001
ENSSSCG00000035636	ENSSSCG00000035636	ENSSSCT00000049995	14:74968877-75061477:+1	No Class	Cluster0001
ENSSSCG00000035652	ENSSSCG00000035652	ENSSSCT00000036833	7:95434922-95435126:+1	No Class	Cluster0001
ENSSSCG00000035680	ENSSSCG00000035680	ENSSSCT00000060226	17:13987162-13991745:+1	No Class	Cluster0001
ENSSSCG00000035721	ENSSSCG00000035721	ENSSSCT00000060564	11:1539207-1592813:-1	No Class	Cluster0001
ENSSSCG00000035732	ENSSSCG00000035732	ENSSSCT00000026900, ENSSSCT00000044177	4:127236599-127245376:+1	No Class	Cluster0001
ENSSSCG00000035750	ENSSSCG00000035750	ENSSSCT00000065824	14:39859778-39892666:+1	No Class	Cluster0001
ENSSSCG00000035751	ENSSSCG00000035751	ENSSSCT00000061863	18:16063958-16258823:-1	No Class	Cluster0001
ENSSSCG00000035766	ENSSSCG00000035766	ENSSSCT00000039403	AEMK02000346.1:38460-39264:-1	No Class	Cluster0001
ENSSSCG00000035788	ENSSSCG00000035788	ENSSSCT00000061434	6:57994333-58016149:-1	zinc finger protein 350	Cluster0001
ENSSSCG00000035794	ENSSSCG00000035794	ENSSSCT00000063851	14:105766502-105770810:+1	No Class	Cluster0001
ENSSSCG00000035799	ENSSSCG00000035799	ENSSSCT00000050693, ENSSSCT00000058460, ENSSSCT00000065240	1:182296371-182301217:+1	No Class	Cluster0001
ENSSSCG00000035816	ENSSSCG00000035816	ENSSSCT00000058799	17:33747089-33774285:-1	No Class	Cluster0001
ENSSSCG00000035821	ENSSSCG00000035821	ENSSSCT00000059067	4:94443830-94449043:+1	No Class	Cluster0001
ENSSSCG00000035826	ENSSSCG00000035826	ENSSSCT00000043092	4:68814682-68815626:-1	No Class	Cluster0001
ENSSSCG00000035835	ENSSSCG00000035835	ENSSSCT00000059354	5:42759662-42759967:-1	No Class	Cluster0001
ENSSSCG00000035838	ENSSSCG00000035838	ENSSSCT00000046973, ENSSSCT00000048488, ENSSSCT00000051753, ENSSSCT00000057638	Y:2678541-2701163:+1	pseudouridine 5 -phosphatase	Cluster0001
ENSSSCG00000035840	ENSSSCG00000035840	ENSSSCT00000056268	1:228153730-228154035:-1	No Class	Cluster0001
ENSSSCG00000035910	ENSSSCG00000035910	ENSSSCT00000037394	1:237927796-237928471:-1	No Class	Cluster0001
ENSSSCG00000035961	ENSSSCG00000035961	ENSSSCT00000051790, ENSSSCT00000056220	13:117363066-117363988:-1	No Class	Cluster0001
ENSSSCG00000036013	ENSSSCG00000036013	ENSSSCT00000048398, ENSSSCT00000050219, ENSSSCT00000057621, ENSSSCT00000063384, ENSSSCT00000064145, ENSSSCT00000064982	18:7629256-7696828:+1	trypsinogen	Cluster0001
ENSSSCG00000036019	ENSSSCG00000036019	ENSSSCT00000056011, ENSSSCT00000056330, ENSSSCT00000062756	5:61876396-61884485:-1	C-type lectin domain containing 9A	Cluster0001
ENSSSCG00000036025	ENSSSCG00000036025	ENSSSCT00000049824, ENSSSCT00000052013	8:31122333-31122963:+1	No Class	Cluster0001
ENSSSCG00000036083	ENSSSCG00000036083	ENSSSCT00000037661, ENSSSCT00000039478, ENSSSCT00000041071, ENSSSCT00000043792, ENSSSCT00000049776, ENSSSCT00000063730	14:102827559-102961858:+1	polycomb group ring finger 5	Cluster0001
ENSSSCG00000036097	ENSSSCG00000036097	ENSSSCT00000057044, ENSSSCT00000059236, ENSSSCT00000061118, ENSSSCT00000061165, ENSSSCT00000062139, ENSSSCT00000063525	7:77028600-77044110:-1	No Class	Cluster0001
ENSSSCG00000036116	ENSSSCG00000036116	ENSSSCT00000046735	14:11451120-11492385:+1	No Class	Cluster0001
ENSSSCG00000036138	ENSSSCG00000036138	ENSSSCT00000061291	9:52871556-52888324:+1	No Class	Cluster0001
ENSSSCG00000036227	ENSSSCG00000036227	ENSSSCT00000047534	13:29479280-29484683:+1	No Class	Cluster0001
ENSSSCG00000036241	ENSSSCG00000036241	ENSSSCT00000063376, ENSSSCT00000064603	7:13579544-13582658:+1	No Class	Cluster0001
ENSSSCG00000036260	ENSSSCG00000036260	ENSSSCT00000065492	6:62486591-62491463:+1	No Class	Cluster0001
ENSSSCG00000036268	ENSSSCG00000036268	ENSSSCT00000043651, ENSSSCT00000053284, ENSSSCT00000053973	3:23754086-23793597:-1	No Class	Cluster0001
ENSSSCG00000036301	ENSSSCG00000036301	ENSSSCT00000060036, ENSSSCT00000063388	10:19936271-19953757:+1	No Class	Cluster0001
ENSSSCG00000036303	ENSSSCG00000036303	ENSSSCT00000042699	3:126071562-126115295:-1	No Class	Cluster0001
ENSSSCG00000036313	ENSSSCG00000036313	ENSSSCT00000053299	8:121427999-121452085:-1	No Class	Cluster0001
ENSSSCG00000036330	ENSSSCG00000036330	ENSSSCT00000060613	17:14655407-14656866:-1	No Class	Cluster0001
ENSSSCG00000036333	ENSSSCG00000036333	ENSSSCT00000048883	9:74374482-74374895:+1	prothymosin alpha-like	Cluster0001
ENSSSCG00000036342	ENSSSCG00000036342	ENSSSCT00000039637, ENSSSCT00000046608	2:64298168-64369886:+1	adhesion G protein-coupled receptor E2-like	Cluster0001
ENSSSCG00000036346	ENSSSCG00000036346	ENSSSCT00000049028	7:87891082-87896031:-1	No Class	Cluster0001
ENSSSCG00000036373	ENSSSCG00000036373	ENSSSCT00000051640	15:13170820-13175152:+1	No Class	Cluster0001
ENSSSCG00000036426	ENSSSCG00000036426	ENSSSCT00000041334	1:252980054-253057781:+1	No Class	Cluster0001
ENSSSCG00000036430	ENSSSCG00000036430	ENSSSCT00000048284	16:27970924-28007943:+1	No Class	Cluster0001
ENSSSCG00000036442	ENSSSCG00000036442	ENSSSCT00000061061	1:146511071-146515922:+1	No Class	Cluster0001
ENSSSCG00000036529	ENSSSCG00000036529	ENSSSCT00000056599	2:103799715-103823573:-1	RIO kinase 2	Cluster0001
ENSSSCG00000036577	ENSSSCG00000036577	ENSSSCT00000038309, ENSSSCT00000039596, ENSSSCT00000050616, ENSSSCT00000052480, ENSSSCT00000054252, ENSSSCT00000060600	7:74811477-74820399:+1	No Class	Cluster0001
ENSSSCG00000036603	ENSSSCG00000036603	ENSSSCT00000041904, ENSSSCT00000058141	3:18434223-18453628:+1	CLN3, battenin	Cluster0001
ENSSSCG00000036608	ENSSSCG00000036608	ENSSSCT00000014990, ENSSSCT00000043500, ENSSSCT00000057224	2:66718077-66901663:+1	No Class	Cluster0001
ENSSSCG00000036698	ENSSSCG00000036698	ENSSSCT00000048319	11:25782622-25782858:+1	No Class	Cluster0001
ENSSSCG00000036707	ENSSSCG00000036707	ENSSSCT00000064520	18:42590416-42596182:+1	No Class	Cluster0001
ENSSSCG00000036736	ENSSSCG00000036736	ENSSSCT00000042617, ENSSSCT00000043847, ENSSSCT00000058041	8:56084512-56143731:+1	No Class	Cluster0001
ENSSSCG00000036788	ENSSSCG00000036788	ENSSSCT00000052538, ENSSSCT00000053156	AEMK02000425.1:50615-51186:-1	No Class	Cluster0001
ENSSSCG00000036853	ENSSSCG00000036853	ENSSSCT00000037920	9:6733758-6736426:-1	No Class	Cluster0001
ENSSSCG00000036854	ENSSSCG00000036854	ENSSSCT00000055840	1:190656086-190656952:-1	No Class	Cluster0001
ENSSSCG00000036877	ENSSSCG00000036877	ENSSSCT00000054332, ENSSSCT00000056030, ENSSSCT00000060034, ENSSSCT00000061333	15:37901687-37957410:-1	zinc finger protein 705A-like	Cluster0001
ENSSSCG00000036900	ENSSSCG00000036900	ENSSSCT00000065169	12:3950017-3951499:+1	No Class	Cluster0001
ENSSSCG00000036951	ENSSSCG00000036951	ENSSSCT00000066211	17:11903343-11908578:+1	No Class	Cluster0001
ENSSSCG00000037003	ENSSSCG00000037003	ENSSSCT00000051592	13:32490811-32493497:+1	No Class	Cluster0001
ENSSSCG00000037014	ENSSSCG00000037014	ENSSSCT00000061281	4:14705893-14706150:-1	No Class	Cluster0001
ENSSSCG00000037031	ENSSSCG00000037031	ENSSSCT00000056709	12:59201509-59276624:+1	No Class	Cluster0001
ENSSSCG00000037042	ENSSSCG00000037042	ENSSSCT00000056614	1:110949975-110950463:-1	No Class	Cluster0001
ENSSSCG00000037050	ENSSSCG00000037050	ENSSSCT00000058807, ENSSSCT00000063916	10:32871417-32874837:-1	No Class	Cluster0001
ENSSSCG00000037059	ENSSSCG00000037059	ENSSSCT00000048813, ENSSSCT00000054256	X:105985489-105986282:+1	No Class	Cluster0001
ENSSSCG00000037089	ENSSSCG00000037089	ENSSSCT00000061350	15:17814953-17816491:+1	No Class	Cluster0001
ENSSSCG00000037092	ENSSSCG00000037092	ENSSSCT00000039298, ENSSSCT00000042309, ENSSSCT00000044041, ENSSSCT00000063391	7:80511103-80516640:-1	No Class	Cluster0001
ENSSSCG00000037160	ENSSSCG00000037160	ENSSSCT00000057181	14:31151480-31151656:-1	No Class	Cluster0001
ENSSSCG00000037175	ENSSSCG00000037175	ENSSSCT00000046100, ENSSSCT00000065473	6:94880893-94885051:-1	No Class	Cluster0001
ENSSSCG00000037176	ENSSSCG00000037176	ENSSSCT00000056971	8:109905225-109907157:+1	No Class	Cluster0001
ENSSSCG00000037278	ENSSSCG00000037278	ENSSSCT00000057797	9:104910270-104910730:-1	No Class	Cluster0001
ENSSSCG00000037290	ENSSSCG00000037290	ENSSSCT00000064450	AEMK02000465.1:371000-375905:-1	No Class	Cluster0001
ENSSSCG00000037295	ENSSSCG00000037295	ENSSSCT00000054762	5:31657933-31672113:+1	No Class	Cluster0001
ENSSSCG00000037332	ENSSSCG00000037332	ENSSSCT00000040323	9:52895640-52900415:-1	No Class	Cluster0001
ENSSSCG00000037342	ENSSSCG00000037342	ENSSSCT00000043220	12:14245334-14252046:+1	No Class	Cluster0001
ENSSSCG00000037390	ENSSSCG00000037390	ENSSSCT00000064077	1:228956158-228956415:-1	No Class	Cluster0001
ENSSSCG00000037394	ENSSSCG00000037394	ENSSSCT00000053109	10:16580673-16581063:+1	No Class	Cluster0001
ENSSSCG00000037444	ENSSSCG00000037444	ENSSSCT00000058398	16:28649720-28653045:+1	No Class	Cluster0001
ENSSSCG00000037504	ENSSSCG00000037504	ENSSSCT00000052924	2:40373330-40379772:+1	MAS related GPR family member X2	Cluster0001
ENSSSCG00000037511	ENSSSCG00000037511	ENSSSCT00000056424	14:120472314-120472577:-1	No Class	Cluster0001
ENSSSCG00000037541	ENSSSCG00000037541	ENSSSCT00000058861	12:6501299-6523747:+1	CD300 molecule like family member f	Cluster0001
ENSSSCG00000037571	ENSSSCG00000037571	ENSSSCT00000066072	6:62205215-62215077:+1	No Class	Cluster0001
ENSSSCG00000037576	ENSSSCG00000037576	ENSSSCT00000055627	11:1443136-1445715:+1	No Class	Cluster0001
ENSSSCG00000037595	ENSSSCG00000037595	ENSSSCT00000015538, ENSSSCT00000038543, ENSSSCT00000047844, ENSSSCT00000058971, ENSSSCT00000062758, ENSSSCT00000062841	2:119955513-120039947:+1	adaptor related protein complex 3 subunit sigma 1	Cluster0001
ENSSSCG00000037636	ENSSSCG00000037636	ENSSSCT00000053463	8:113605919-113607879:+1	No Class	Cluster0001
ENSSSCG00000037655	ENSSSCG00000037655	ENSSSCT00000055120, ENSSSCT00000057131, ENSSSCT00000060835	13:189289522-189327500:+1	GA binding protein transcription factor subunit alpha	Cluster0001
ENSSSCG00000037664	ENSSSCG00000037664	ENSSSCT00000043472	6:82672445-82674046:+1	No Class	Cluster0001
ENSSSCG00000037679	ENSSSCG00000037679	ENSSSCT00000065580	7:94157732-94163433:+1	No Class	Cluster0001
ENSSSCG00000037683	ENSSSCG00000037683	ENSSSCT00000040475	2:9278890-9296411:+1	No Class	Cluster0001
ENSSSCG00000037695	ENSSSCG00000037695	ENSSSCT00000056680	7:45298705-45299811:+1	No Class	Cluster0001
ENSSSCG00000037748	ENSSSCG00000037748	ENSSSCT00000059129	6:95070798-95115106:+1	No Class	Cluster0001
ENSSSCG00000037778	ENSSSCG00000037778	ENSSSCT00000044839	3:97967833-97996098:-1	No Class	Cluster0001
ENSSSCG00000037783	ENSSSCG00000037783	ENSSSCT00000059866	17:41564163-41564887:+1	No Class	Cluster0001
ENSSSCG00000037786	ENSSSCG00000037786	ENSSSCT00000054942	13:5484986-5488701:-1	No Class	Cluster0001
ENSSSCG00000037861	ENSSSCG00000037861	ENSSSCT00000059079	6:135485758-135487033:+1	No Class	Cluster0001
ENSSSCG00000037936	ENSSSCG00000037936	ENSSSCT00000053434	13:30469970-30470170:+1	No Class	Cluster0001
ENSSSCG00000037945	ENSSSCG00000037945	ENSSSCT00000055748	13:82794260-82794526:+1	No Class	Cluster0001
ENSSSCG00000037976	ENSSSCG00000037976	ENSSSCT00000051859	6:56804686-56868877:-1	No Class	Cluster0001
ENSSSCG00000037998	ENSSSCG00000037998	ENSSSCT00000056451	1:107108433-107110300:+1	small ubiquitin-related modifier 1-like	Cluster0001
ENSSSCG00000038091	ENSSSCG00000038091	ENSSSCT00000063149	14:31738597-31741641:+1	No Class	Cluster0001
ENSSSCG00000038095	ENSSSCG00000038095	ENSSSCT00000054074, ENSSSCT00000054419, ENSSSCT00000055969, ENSSSCT00000060813	8:42129911-42154634:+1	zinc finger protein 11-like	Cluster0001
ENSSSCG00000038098	ENSSSCG00000038098	ENSSSCT00000051385	7:55423721-55424053:+1	No Class	Cluster0001
ENSSSCG00000038103	ENSSSCG00000038103	ENSSSCT00000062280	5:16056486-16056611:+1	No Class	Cluster0001
ENSSSCG00000038120	ENSSSCG00000038120	ENSSSCT00000045360, ENSSSCT00000046696	9:131063054-131066123:-1	No Class	Cluster0001
ENSSSCG00000038235	ENSSSCG00000038235	ENSSSCT00000042434	9:121742539-121743904:+1	No Class	Cluster0001
ENSSSCG00000038260	ENSSSCG00000038260	ENSSSCT00000043173	5:79281586-79288705:+1	No Class	Cluster0001
ENSSSCG00000038261	ENSSSCG00000038261	ENSSSCT00000056541	1:57011549-57011982:+1	No Class	Cluster0001
ENSSSCG00000038327	ENSSSCG00000038327	ENSSSCT00000039668, ENSSSCT00000050968, ENSSSCT00000052392, ENSSSCT00000055826	6:61810536-61826917:+1	zinc finger protein 548-like	Cluster0001
ENSSSCG00000038336	ENSSSCG00000038336	ENSSSCT00000054824	2:26065465-26065620:+1	No Class	Cluster0001
ENSSSCG00000038360	ENSSSCG00000038360	ENSSSCT00000053400, ENSSSCT00000059706	10:24805127-24806354:+1	No Class	Cluster0001
ENSSSCG00000038385	ENSSSCG00000038385	ENSSSCT00000055517	8:132444611-132444835:-1	No Class	Cluster0001
ENSSSCG00000038392	ENSSSCG00000038392	ENSSSCT00000046584, ENSSSCT00000051520, ENSSSCT00000058257, ENSSSCT00000063343	AEMK02000605.1:2916-24244:-1	antigen WC1.1-like	Cluster0001
ENSSSCG00000038426	ENSSSCG00000038426	ENSSSCT00000056013	X:34311017-34401764:-1	No Class	Cluster0001
ENSSSCG00000038434	ENSSSCG00000038434	ENSSSCT00000055606	3:80022163-80064825:-1	No Class	Cluster0001
ENSSSCG00000038445	ENSSSCG00000038445	ENSSSCT00000065152	7:89663037-89666734:+1	No Class	Cluster0001
ENSSSCG00000038457	ENSSSCG00000038457	ENSSSCT00000055624	17:37696841-37729831:-1	No Class	Cluster0001
ENSSSCG00000038462	ENSSSCG00000038462	ENSSSCT00000039689	AEMK02000427.1:23459-67882:+1	centrosomal protein of 70 kDa-like	Cluster0001
ENSSSCG00000038475	ENSSSCG00000038475	ENSSSCT00000044916, ENSSSCT00000049717, ENSSSCT00000053793	6:128004528-128030296:+1	glyoxylate/hydroxypyruvate reductase B	Cluster0001
ENSSSCG00000038608	ENSSSCG00000038608	ENSSSCT00000041430	15:17026306-17033444:+1	No Class	Cluster0001
ENSSSCG00000038621	ENSSSCG00000038621	ENSSSCT00000037912	5:65932439-65932794:+1	No Class	Cluster0001
ENSSSCG00000038633	ENSSSCG00000038633	ENSSSCT00000039717	14:113809345-113845713:+1	BLOC-1 related complex subunit 7	Cluster0001
ENSSSCG00000038638	ENSSSCG00000038638	ENSSSCT00000048516	13:134495552-134495852:+1	No Class	Cluster0001
ENSSSCG00000038697	ENSSSCG00000038697	ENSSSCT00000037073	14:66855456-66856003:-1	No Class	Cluster0001
ENSSSCG00000038845	ENSSSCG00000038845	ENSSSCT00000040016, ENSSSCT00000048289, ENSSSCT00000062503	13:120805064-120809024:+1	protein FAM136A	Cluster0001
ENSSSCG00000038865	ENSSSCG00000038865	ENSSSCT00000048762, ENSSSCT00000053307, ENSSSCT00000065753	3:55160296-55165675:+1	No Class	Cluster0001
ENSSSCG00000038908	ENSSSCG00000038908	ENSSSCT00000039027	X:64697402-64718565:-1	No Class	Cluster0001
ENSSSCG00000038939	ENSSSCG00000038939	ENSSSCT00000059338	14:9699489-9702689:+1	No Class	Cluster0001
ENSSSCG00000038957	ENSSSCG00000038957	ENSSSCT00000045102	4:66932-72480:+1	No Class	Cluster0001
ENSSSCG00000038982	ENSSSCG00000038982	ENSSSCT00000048660	16:68260647-68261729:+1	No Class	Cluster0001
ENSSSCG00000039035	ENSSSCG00000039035	ENSSSCT00000053629	1:143696607-143699105:+1	No Class	Cluster0001
ENSSSCG00000039086	ENSSSCG00000039086	ENSSSCT00000040983	13:69261187-69268942:-1	No Class	Cluster0001
ENSSSCG00000039126	ENSSSCG00000039126	ENSSSCT00000045377, ENSSSCT00000061752, ENSSSCT00000066362	2:67320809-67324550:-1	No Class	Cluster0001
ENSSSCG00000039128	ENSSSCG00000039128	ENSSSCT00000056808	6:51401281-51420787:-1	No Class	Cluster0001
ENSSSCG00000039177	ENSSSCG00000039177	ENSSSCT00000038604, ENSSSCT00000044792	AEMK02000170.1:3565-4583:+1	No Class	Cluster0001
ENSSSCG00000039240	ENSSSCG00000039240	ENSSSCT00000046505	7:78340556-78368517:+1	ribonuclease A family member 9 (inactive)	Cluster0001
ENSSSCG00000039242	ENSSSCG00000039242	ENSSSCT00000059261	AEMK02000484.1:4468-5709:-1	No Class	Cluster0001
ENSSSCG00000039254	ENSSSCG00000039254	ENSSSCT00000037903	2:42321547-42383106:+1	No Class	Cluster0001
ENSSSCG00000039259	ENSSSCG00000039259	ENSSSCT00000042591, ENSSSCT00000042709	12:26532917-26559058:-1	leucine-rich repeat-containing protein 37A2-like	Cluster0001
ENSSSCG00000039277	ENSSSCG00000039277	ENSSSCT00000057215	6:92133938-92134180:-1	No Class	Cluster0001
ENSSSCG00000039305	ENSSSCG00000039305	ENSSSCT00000044574	4:91320200-91322072:-1	No Class	Cluster0001
ENSSSCG00000039310	ENSSSCG00000039310	ENSSSCT00000046419	18:13841304-13843295:+1	No Class	Cluster0001
ENSSSCG00000039323	ENSSSCG00000039323	ENSSSCT00000052220, ENSSSCT00000062326	4:51249854-51252893:+1	No Class	Cluster0001
ENSSSCG00000039422	ENSSSCG00000039422	ENSSSCT00000040739	7:63394845-63397710:+1	No Class	Cluster0001
ENSSSCG00000039434	ENSSSCG00000039434	ENSSSCT00000064798	6:151188407-151189697:+1	No Class	Cluster0001
ENSSSCG00000039443	ENSSSCG00000039443	ENSSSCT00000054229	1:104157073-104170987:+1	dynactin-associated protein	Cluster0001
ENSSSCG00000039446	ENSSSCG00000039446	ENSSSCT00000063111	9:65858366-65858717:+1	No Class	Cluster0001
ENSSSCG00000039456	ENSSSCG00000039456	ENSSSCT00000049875	X:37341574-37391557:-1	No Class	Cluster0001
ENSSSCG00000039476	ENSSSCG00000039476	ENSSSCT00000047004, ENSSSCT00000050047, ENSSSCT00000055770, ENSSSCT00000056683	AEMK02000465.1:376842-635796:-1	dehydrogenase/reductase SDR family member on chromosome X	Cluster0001
ENSSSCG00000039478	ENSSSCG00000039478	ENSSSCT00000045216	13:31394604-31395059:+1	No Class	Cluster0001
ENSSSCG00000039484	ENSSSCG00000039484	ENSSSCT00000063546	3:77371874-77378441:+1	No Class	Cluster0001
ENSSSCG00000039698	ENSSSCG00000039698	ENSSSCT00000042268	4:84972422-85000563:-1	No Class	Cluster0001
ENSSSCG00000039705	ENSSSCG00000039705	ENSSSCT00000044840, ENSSSCT00000064150	2:82235428-82238674:-1	No Class	Cluster0001
ENSSSCG00000039709	ENSSSCG00000039709	ENSSSCT00000051584	7:77171479-77172859:-1	No Class	Cluster0001
ENSSSCG00000039716	ENSSSCG00000039716	ENSSSCT00000049713	3:24702755-24705017:-1	No Class	Cluster0001
ENSSSCG00000039746	ENSSSCG00000039746	ENSSSCT00000064952	2:8305547-8308255:+1	No Class	Cluster0001
ENSSSCG00000039774	ENSSSCG00000039774	ENSSSCT00000047218	2:75774533-75785862:+1	zinc finger protein 709-like	Cluster0001
ENSSSCG00000039814	ENSSSCG00000039814	ENSSSCT00000040298, ENSSSCT00000046864, ENSSSCT00000063416	9:51337486-51538289:-1	No Class	Cluster0001
ENSSSCG00000039877	ENSSSCG00000039877	ENSSSCT00000042898	7:83254491-83256588:-1	No Class	Cluster0001
ENSSSCG00000039898	ENSSSCG00000039898	ENSSSCT00000054431	9:127744717-127751146:-1	No Class	Cluster0001
ENSSSCG00000039978	ENSSSCG00000039978	ENSSSCT00000043187, ENSSSCT00000048832, ENSSSCT00000054825	6:61929046-61945739:+1	zinc finger protein 773-like	Cluster0001
ENSSSCG00000040018	ENSSSCG00000040018	ENSSSCT00000047073	1:128091512-128092406:-1	No Class	Cluster0001
ENSSSCG00000040032	ENSSSCG00000040032	ENSSSCT00000047542	5:99297125-99298088:+1	No Class	Cluster0001
ENSSSCG00000040036	ENSSSCG00000040036	ENSSSCT00000041682, ENSSSCT00000047722, ENSSSCT00000059708	6:54963996-54971107:+1	sialic acid binding Ig like lectin 11	Cluster0001
ENSSSCG00000040048	ENSSSCG00000040048	ENSSSCT00000042721	4:36663869-36664275:-1	No Class	Cluster0001
ENSSSCG00000040064	ENSSSCG00000040064	ENSSSCT00000041736	16:22170247-22170935:-1	No Class	Cluster0001
ENSSSCG00000040113	ENSSSCG00000040113	ENSSSCT00000054264	AEMK02000156.1:63872-96759:+1	No Class	Cluster0001
ENSSSCG00000040122	ENSSSCG00000040122	ENSSSCT00000053869	6:62388338-62393699:+1	No Class	Cluster0001
ENSSSCG00000040146	ENSSSCG00000040146	ENSSSCT00000065323	13:29674384-29679064:-1	serine protease 45	Cluster0001
ENSSSCG00000040148	ENSSSCG00000040148	ENSSSCT00000058745	8:37906223-37912030:-1	No Class	Cluster0001
ENSSSCG00000040196	ENSSSCG00000040196	ENSSSCT00000056380	14:50123718-50124210:-1	No Class	Cluster0001
ENSSSCG00000040198	ENSSSCG00000040198	ENSSSCT00000061982	X:69843622-69847416:+1	No Class	Cluster0001
ENSSSCG00000040217	ENSSSCG00000040217	ENSSSCT00000043590	13:30448643-30448891:+1	No Class	Cluster0001
ENSSSCG00000040227	ENSSSCG00000040227	ENSSSCT00000053213	2:72732478-72732711:-1	No Class	Cluster0001
ENSSSCG00000040260	ENSSSCG00000040260	ENSSSCT00000050609, ENSSSCT00000058515	3:7581544-7623302:-1	transmembrane protein 238-like	Cluster0001
ENSSSCG00000040280	ENSSSCG00000040280	ENSSSCT00000041548	13:31480620-31481098:+1	No Class	Cluster0001
ENSSSCG00000040294	ENSSSCG00000040294	ENSSSCT00000062499	15:17576842-17580220:+1	activated RNA polymerase II transcriptional coactivator p15	Cluster0001
ENSSSCG00000040351	ENSSSCG00000040351	ENSSSCT00000062075	6:54302892-54308064:+1	No Class	Cluster0001
ENSSSCG00000040379	ENSSSCG00000040379	ENSSSCT00000058603	3:57276251-57280798:+1	No Class	Cluster0001
ENSSSCG00000040380	ENSSSCG00000040380	ENSSSCT00000038505	2:5800855-5805813:+1	No Class	Cluster0001
ENSSSCG00000040392	ENSSSCG00000040392	ENSSSCT00000058309	17:49320614-49380788:-1	No Class	Cluster0001
ENSSSCG00000040415	ENSSSCG00000040415	ENSSSCT00000041044	7:77051319-77056115:-1	No Class	Cluster0001
ENSSSCG00000040429	ENSSSCG00000040429	ENSSSCT00000063073	5:6926390-6967045:-1	No Class	Cluster0001
ENSSSCG00000040433	ENSSSCG00000040433	ENSSSCT00000045568, ENSSSCT00000056096, ENSSSCT00000059274	6:57353640-57378192:-1	No Class	Cluster0001
ENSSSCG00000040437	ENSSSCG00000040437	ENSSSCT00000045864	18:18861715-18865622:-1	No Class	Cluster0001
ENSSSCG00000040473	ENSSSCG00000040473	ENSSSCT00000027608	AEMK02000208.1:64345-65494:+1	No Class	Cluster0001
ENSSSCG00000040487	ENSSSCG00000040487	ENSSSCT00000061572	2:70175404-70203800:+1	No Class	Cluster0001
ENSSSCG00000040490	ENSSSCG00000040490	ENSSSCT00000049444	4:101208883-101255110:-1	No Class	Cluster0001
ENSSSCG00000040491	ENSSSCG00000040491	ENSSSCT00000037107, ENSSSCT00000052359	13:112989559-112991056:-1	No Class	Cluster0001
ENSSSCG00000040525	ENSSSCG00000040525	ENSSSCT00000066063	8:67454568-67458814:-1	No Class	Cluster0001
ENSSSCG00000040548	ENSSSCG00000040548	ENSSSCT00000002321, ENSSSCT00000037040, ENSSSCT00000044298, ENSSSCT00000050307, ENSSSCT00000054752, ENSSSCT00000056946, ENSSSCT00000065670	7:77310953-77333092:-1	No Class	Cluster0001
ENSSSCG00000040560	ENSSSCG00000040560	ENSSSCT00000059654	AEMK02000245.1:52104-52901:+1	No Class	Cluster0001
ENSSSCG00000040566	ENSSSCG00000040566	ENSSSCT00000041843	11:8857175-8872221:-1	No Class	Cluster0001
ENSSSCG00000040580	ENSSSCG00000040580	ENSSSCT00000048759	1:9209308-9210565:+1	No Class	Cluster0001
ENSSSCG00000040585	ENSSSCG00000040585	ENSSSCT00000038997, ENSSSCT00000053501	13:67613229-67614657:-1	No Class	Cluster0001
ENSSSCG00000040632	ENSSSCG00000040632	ENSSSCT00000062662	4:94297627-94301463:-1	No Class	Cluster0001
ENSSSCG00000040684	ENSSSCG00000040684	ENSSSCT00000054259	9:46308906-46313312:-1	No Class	Cluster0001
ENSSSCG00000040688	ENSSSCG00000040688	ENSSSCT00000058294	6:62465106-62469988:+1	No Class	Cluster0001
ENSSSCG00000040699	ENSSSCG00000040699	ENSSSCT00000047933, ENSSSCT00000059462	6:105450070-105454565:+1	No Class	Cluster0001
ENSSSCG00000040737	ENSSSCG00000040737	ENSSSCT00000051716	7:35090513-35096103:-1	No Class	Cluster0001
ENSSSCG00000040739	ENSSSCG00000040739	ENSSSCT00000040758	14:108337302-108338069:+1	No Class	Cluster0001
ENSSSCG00000040752	ENSSSCG00000040752	ENSSSCT00000061502	3:120013010-120022784:+1	No Class	Cluster0001
ENSSSCG00000040763	ENSSSCG00000040763	ENSSSCT00000038017, ENSSSCT00000041592, ENSSSCT00000059042	2:67881805-67907863:-1	zinc finger protein 177-like	Cluster0001
ENSSSCG00000040767	ENSSSCG00000040767	ENSSSCT00000037266	4:6884182-6888029:+1	No Class	Cluster0001
ENSSSCG00000040781	ENSSSCG00000040781	ENSSSCT00000039915, ENSSSCT00000057978	15:118235172-118235946:-1	No Class	Cluster0001
ENSSSCG00000040827	ENSSSCG00000040827	ENSSSCT00000065785	13:196207407-196224805:-1	cilia and flagella associated protein 298	Cluster0001
ENSSSCG00000040828	ENSSSCG00000040828	ENSSSCT00000038426, ENSSSCT00000051050, ENSSSCT00000052561	6:57239708-57258115:-1	zinc finger protein 347	Cluster0001
ENSSSCG00000040830	ENSSSCG00000040830	ENSSSCT00000037684	13:39402190-39435280:+1	No Class	Cluster0001
ENSSSCG00000040864	ENSSSCG00000040864	ENSSSCT00000058876	4:83706077-83708941:-1	No Class	Cluster0001
ENSSSCG00000040906	ENSSSCG00000040906	ENSSSCT00000061861	7:19520081-19524321:-1	No Class	Cluster0001
ENSSSCG00000040918	ENSSSCG00000040918	ENSSSCT00000061187	1:21406937-21409950:+1	No Class	Cluster0001
ENSSSCG00000040942	ENSSSCG00000040942	ENSSSCT00000055200	12:25366931-25410026:-1	beta-1,4-N-acetyl-galactosaminyltransferase 2	Cluster0001
ENSSSCG00000040958	ENSSSCG00000040958	ENSSSCT00000065116	16:28176015-28176685:-1	No Class	Cluster0001
EPC1	ENSSSCG00000011028	ENSSSCT00000012070, ENSSSCT00000045008, ENSSSCT00000046192, ENSSSCT00000062300, XM_005668099, XM_005668100, XM_013980224, XM_021064807	10:42835287-42946864:-1	enhancer of polycomb homolog 1	Cluster0001
EPC2	ENSSSCG00000027211	ENSSSCT00000017063, ENSSSCT00000028524, ENSSSCT00000042713, XM_021076082, XM_021076083	15:3417078-3526187:-1	enhancer of polycomb homolog 2	Cluster0001
EPG5	ENSSSCG00000021072	ENSSSCT00000027237, XM_021092525	1:95498733-95603018:-1	ectopic P-granules autophagy protein 5 homolog	Cluster0001
EPGN	ENSSSCG00000040736	ENSSSCT00000040660, XM_021101431	8:70283900-70300594:+1	epithelial mitogen	Cluster0001
EPS15	ENSSSCG00000003872	ENSSSCT00000004284, ENSSSCT00000036928, ENSSSCT00000039780, ENSSSCT00000042554, ENSSSCT00000059835, XM_005665438, XM_013999405, XM_013999406, XM_013999407, XM_021096667, XM_021096668, XM_021096669	6:160653848-160792631:+1	epidermal growth factor receptor pathway substrate 15	Cluster0001
ERBIN	ENSSSCG00000016954	ENSSSCT00000018461, ENSSSCT00000018462, ENSSSCT00000035098, ENSSSCT00000050289, ENSSSCT00000054440, ENSSSCT00000056306, ENSSSCT00000057010, ENSSSCT00000060941, XM_013984821, XM_021076788, XM_021076789, XM_021076790, XM_021076791, XM_021076792, XM_021076793, XM_021076794, XM_021076795, XM_021076796, XM_021076797, XM_021076798, XM_021076799, XM_021076800, XM_021076801, XM_021076803, XM_021076804, X…	16:44415164-44533349:+1	erbb2 interacting protein	Cluster0001
ERCC4	ENSSSCG00000007881	ENSSSCT00000008636, XM_003124586	3:29269989-29306109:-1	ERCC excision repair 4, endonuclease catalytic subunit	Cluster0001
ERCC6	ENSSSCG00000010391	ENSSSCT00000011375, XM_021073703	14:90002024-90070439:-1	ERCC excision repair 6, chromatin remodeling factor	Cluster0001
ERI1	ENSSSCG00000033634	ENSSSCT00000044132, ENSSSCT00000044310, ENSSSCT00000053872, XM_021075033	15:56096806-56160272:-1	exoribonuclease 1	Cluster0001
ERO1A	ENSSSCG00000005037	ENSSSCT00000005553, ENSSSCT00000048184, ENSSSCT00000059363	1:182265012-182318968:-1	endoplasmic reticulum oxidoreductase 1 alpha	Cluster0001
ESCO1	ENSSSCG00000003700	ENSSSCT00000004099, ENSSSCT00000042993, XM_003127852, XM_021096164, XM_021096165	6:106695847-106789243:-1	establishment of sister chromatid cohesion N-acetyltransferase 1	Cluster0001
ETAA1	ENSSSCG00000023908	ENSSSCT00000027369, ENSSSCT00000050623, XM_021087430, XM_021087431, XM_021087432, XM_021087433, XM_021087434, XM_021087435	3:74721069-74795623:-1	ETAA1, ATR kinase activator	Cluster0001
ETNK1	ENSSSCG00000039397	ENSSSCT00000046295, XM_021092211	5:50914827-50970738:-1	ethanolamine kinase 1	Cluster0001
EXOC1	ENSSSCG00000023269	ENSSSCT00000024124, ENSSSCT00000031053, ENSSSCT00000038825, ENSSSCT00000043734, ENSSSCT00000054715, ENSSSCT00000055655, ENSSSCT00000060283, ENSSSCT00000062601, XM_003356946, XM_005666702, XM_005666704, XM_005666705, XM_005666706, XM_005666707, XM_013978732, XM_021101339, XM_021101340, XM_021101342, XM_021101343, XM_021101345, XM_021101346, XM_021101348, XM_021101349	8:55189324-55246528:+1	exocyst complex component 1	Cluster0001
EXOC4	ENSSSCG00000016543	ENSSSCT00000018013, XM_021078822	18:15109324-15906714:-1	exocyst complex component 4	Cluster0001
EXOC5	ENSSSCG00000005066	ENSSSCT00000005583, ENSSSCT00000040330, XM_021102546	1:186377519-186430107:-1	exocyst complex component 5	Cluster0001
EXOC6	ENSSSCG00000010473	ENSSSCT00000011461, ENSSSCT00000032502, ENSSSCT00000042930, ENSSSCT00000051724, XM_021073792, XM_021073793, XM_021073794, XM_021073795	14:104327026-104550642:+1	exocyst complex component 6	Cluster0001
EXOC6B	ENSSSCG00000008310	ENSSSCT00000009101, ENSSSCT00000026655, ENSSSCT00000032116, ENSSSCT00000057848, XM_013996035	3:69938880-70401539:+1	exocyst complex component 6B	Cluster0001
EXOC8	ENSSSCG00000010174	ENSSSCT00000011140	14:59192408-59197537:+1	exocyst complex component 8	Cluster0001
EXOG	ENSSSCG00000011258	ENSSSCT00000012326, XM_003132105, XM_021071674, XM_021071675	13:23279168-23322253:+1	exo/endonuclease G	Cluster0001
EYA3	ENSSSCG00000003580	ENSSSCT00000003975, ENSSSCT00000024325, ENSSSCT00000038041, ENSSSCT00000052478, XM_021095661	6:85095413-85185861:-1	EYA transcriptional coactivator and phosphatase 3	Cluster0001
FAF1	ENSSSCG00000003877	ENSSSCT00000004289, ENSSSCT00000036500, ENSSSCT00000056458, XM_021097816, XM_021097817	6:161166981-161603725:+1	Fas associated factor 1	Cluster0001
FAM114A2	ENSSSCG00000017073	ENSSSCT00000018589, ENSSSCT00000032210, XM_013984903, XM_013984904	16:69121537-69159408:+1	family with sequence similarity 114 member A2	Cluster0001
FAM120C	ENSSSCG00000035822	ENSSSCT00000040652, XM_021080777	X:46777923-46904289:-1	family with sequence similarity 120C	Cluster0001
FAM126A	ENSSSCG00000015386	ENSSSCT00000016761, ENSSSCT00000022993, XM_005656687, XM_013989579	9:91729060-91821619:-1	family with sequence similarity 126 member A	Cluster0001
FAM126B	ENSSSCG00000036339	ENSSSCT00000048280, ENSSSCT00000048503, ENSSSCT00000050098, ENSSSCT00000051647, ENSSSCT00000061427	15:104665729-104747617:-1	family with sequence similarity 126 member B	Cluster0001
FAM135A	ENSSSCG00000004275	ENSSSCT00000004725, ENSSSCT00000045995, ENSSSCT00000048904, ENSSSCT00000054799, ENSSSCT00000060012, ENSSSCT00000062959, ENSSSCT00000064116, XM_003353241, XM_005659250, XM_013992626, XM_021089377, XM_021089387, XM_021089417, XM_021089429, XM_021089434, XM_021089438	1:50579715-50716186:+1	family with sequence similarity 135 member A	Cluster0001
FAM13B	ENSSSCG00000029125	ENSSSCT00000029775, ENSSSCT00000038786, ENSSSCT00000041691, ENSSSCT00000043309, ENSSSCT00000043549, ENSSSCT00000046408, ENSSSCT00000046424, ENSSSCT00000047010, XM_021084802, XM_021084803, XM_021084804, XM_021084805, XM_021084806, XM_021084807, XM_021084808, XM_021084809, XM_021084811, XM_021084812, XM_021084813, XM_021084814, XM_021084815, XM_021084816, XM_021084817, XM_021084818, XM_021084819, X…	2:139957613-140073621:-1	family with sequence similarity 13 member B	Cluster0001
FAM149B1	ENSSSCG00000026898	ENSSSCT00000011267, ENSSSCT00000031242, ENSSSCT00000038043, ENSSSCT00000056961, ENSSSCT00000061766, XM_013983338, XM_021074321, XM_021074322	14:75992590-76097838:+1	family with sequence similarity 149 member B1	Cluster0001
FAM151B	ENSSSCG00000014123	ENSSSCT00000029158, XM_021084494	2:89112321-89144266:+1	family with sequence similarity 151 member B	Cluster0001
FAM160B1	ENSSSCG00000010652	ENSSSCT00000011651, XM_001929362	14:125158266-125196249:+1	family with sequence similarity 160 member B1	Cluster0001
FAM172A	ENSSSCG00000027608	ENSSSCT00000015467, ENSSSCT00000022254, ENSSSCT00000041667, ENSSSCT00000042389, ENSSSCT00000043904, ENSSSCT00000045326, ENSSSCT00000046017, ENSSSCT00000049759, ENSSSCT00000050975, ENSSSCT00000065346, XM_013994983, XM_013994986, XM_013994988, XM_013994989, XM_021085388, XM_021085389, XM_021085390, XM_021085392, XM_021085393	2:100456787-100893668:-1	family with sequence similarity 172 member A	Cluster0001
FAM185A	ENSSSCG00000015414	ENSSSCT00000016789, ENSSSCT00000049275, XM_013979806, XM_021102563, XM_021102564, XM_021102565	9:102919961-102969690:+1	family with sequence similarity 185 member A	Cluster0001
FAM208A	.	XM_003358482, XM_003358484, XM_013981800, XM_021068979	.	family with sequence similarity 208 member A	Cluster0001
FAM20B	ENSSSCG00000015524	ENSSSCT00000016911, ENSSSCT00000047758, ENSSSCT00000059851, ENSSSCT00000063189, XM_003130339, XM_013979902, XM_013979903, XM_021063733, XM_021063734	9:120809706-120854970:+1	FAM20B, glycosaminoglycan xylosylkinase	Cluster0001
FAM214A	ENSSSCG00000004617	ENSSSCT00000005098, ENSSSCT00000045447, ENSSSCT00000047929, ENSSSCT00000052318, ENSSSCT00000053294, ENSSSCT00000063995, XM_005659591, XM_005659592, XM_005659593, XM_021095179, XM_021095188, XM_021095202	1:118993420-119124457:+1	family with sequence similarity 214 member A	Cluster0001
FAM237B	ENSSSCG00000031091	ENSSSCT00000063465	9:70434363-70462456:-1	family with sequence similarity 237 member A	Cluster0001
FAM3C	ENSSSCG00000016616	ENSSSCT00000018090, ENSSSCT00000047128, ENSSSCT00000062708, XM_003134737	18:25569383-25612740:+1	family with sequence similarity 3 member C	Cluster0001
FAM76A	ENSSSCG00000027894	ENSSSCT00000030027, ENSSSCT00000052271, XM_005653375, XM_021093428	6:84879984-84912714:+1	family with sequence similarity 76 member A	Cluster0001
FAM76B	ENSSSCG00000014967	ENSSSCT00000016328, XM_003129793, XM_013979298, XM_013979299	9:27790141-27812222:-1	family with sequence similarity 76 member B	Cluster0001
FANCC	ENSSSCG00000033654	ENSSSCT00000011975, ENSSSCT00000045875, XM_021064599, XM_021064600, XM_021064601	10:26796553-27061583:+1	Fanconi anemia complementation group C	Cluster0001
FANCM	ENSSSCG00000005000	ENSSSCT00000005515, ENSSSCT00000030082, ENSSSCT00000061562, XM_003480459, XM_021101202	1:175334141-175445650:+1	Fanconi anemia complementation group M	Cluster0001
FAR1	ENSSSCG00000021170	ENSSSCT00000025883, ENSSSCT00000039737, ENSSSCT00000043897, ENSSSCT00000045981, ENSSSCT00000061471, ENSSSCT00000065337, XM_013994548	2:45527952-45605657:-1	fatty acyl-CoA reductase 1	Cluster0001
FAS	ENSSSCG00000010448	ENSSSCT00000011433, XM_021072073	14:100927112-100954882:+1	Fas cell surface death receptor	Cluster0001
FASTKD1	ENSSSCG00000015933	ENSSSCT00000017349, ENSSSCT00000025574, ENSSSCT00000038522, ENSSSCT00000038722, ENSSSCT00000054623, ENSSSCT00000054941, ENSSSCT00000056560, ENSSSCT00000060656, ENSSSCT00000065999	15:75895528-75929510:-1	FAST kinase domains 1	Cluster0001
FAT4	ENSSSCG00000036155	ENSSSCT00000056583, XM_021101611	8:99149641-99310519:-1	FAT atypical cadherin 4	Cluster0001
FBXL13	ENSSSCG00000037822	ENSSSCT00000038399, XM_013979811	9:102975060-103179322:-1	F-box and leucine rich repeat protein 13	Cluster0001
FBXL17	ENSSSCG00000014190	ENSSSCT00000015504, ENSSSCT00000040936, ENSSSCT00000041259, XM_003123817	2:113297645-113480210:-1	F-box and leucine rich repeat protein 17	Cluster0001
FBXL20	ENSSSCG00000017506	ENSSSCT00000019059, ENSSSCT00000051396, XM_003482995, XM_013979816, XM_013979820	12:22874161-22967342:+1	F-box and leucine rich repeat protein 20	Cluster0001
FBXL3	ENSSSCG00000009472	ENSSSCT00000010385, ENSSSCT00000039556, ENSSSCT00000059559, XM_003357868	11:49131434-49151026:-1	F-box and leucine rich repeat protein 3	Cluster0001
FBXO11	ENSSSCG00000029485	ENSSSCT00000028062	3:92696409-92792621:+1	F-box protein 11	Cluster0001
FBXO16	ENSSSCG00000009678	ENSSSCT00000010612, ENSSSCT00000055664, ENSSSCT00000058235, XM_005670453, XM_013982683, XM_021072808	14:12220506-12277551:-1	F-box protein 16	Cluster0001
FBXO3	ENSSSCG00000013308	ENSSSCT00000014534, XM_003480711	2:27145774-27184181:+1	F-box protein 3	Cluster0001
FBXO4	ENSSSCG00000016865	ENSSSCT00000018368	16:26707474-26722866:+1	F-box protein 4	Cluster0001
FBXW11	ENSSSCG00000023307	ENSSSCT00000032458, ENSSSCT00000048792, ENSSSCT00000053069, ENSSSCT00000053469, ENSSSCT00000054736, ENSSSCT00000055215, ENSSSCT00000058532, XM_021077115, XM_021077119, XM_021077121	16:52212645-52337913:+1	F-box and WD repeat domain containing 11	Cluster0001
FCHO2	ENSSSCG00000022661	ENSSSCT00000026067, ENSSSCT00000041247, ENSSSCT00000047233, ENSSSCT00000054977, ENSSSCT00000061003, XM_013994888, XM_021084437, XM_021084438	2:82100554-82246034:+1	FCH domain only 2	Cluster0001
FDXACB1	ENSSSCG00000021871	ENSSSCT00000027060	9:39624123-39629861:-1	ferredoxin-fold anticodon binding domain containing 1	Cluster0001
FEM1C	ENSSSCG00000014217	ENSSSCT00000015535, ENSSSCT00000041545, ENSSSCT00000051904, XM_021084648, XM_021084651	2:119699598-119722902:-1	fem-1 homolog C	Cluster0001
FER	ENSSSCG00000027074	ENSSSCT00000015505, ENSSSCT00000024375, ENSSSCT00000050072, ENSSSCT00000050549, XM_021084606, XM_021084608, XM_021084610, XM_021084611	2:113822532-114206930:+1	FER tyrosine kinase	Cluster0001
FGD4	ENSSSCG00000000530	ENSSSCT00000000572, ENSSSCT00000033918, ENSSSCT00000035951, ENSSSCT00000036458, ENSSSCT00000039923, ENSSSCT00000051863, ENSSSCT00000064276, XM_021092067, XM_021092070, XM_021092071, XM_021092072, XM_021092074	5:41681453-41879084:-1	FYVE, RhoGEF and PH domain containing 4	Cluster0001
FGFR1OP2	ENSSSCG00000000554	ENSSSCT00000000597, ENSSSCT00000032540, ENSSSCT00000046515, XM_001924597, XM_005664032, XM_013997787, XM_021092166	5:46793137-46824696:-1	FGFR1 oncogene partner 2	Cluster0001
FLVCR1	ENSSSCG00000015590	ENSSSCT00000016983	9:130541635-130570702:-1	feline leukemia virus subgroup C cellular receptor 1	Cluster0001
FMR1	ENSSSCG00000012727	ENSSSCT00000013914, ENSSSCT00000034989, ENSSSCT00000035645, ENSSSCT00000036178, ENSSSCT00000036460, XM_001925732, XM_003360469, XM_003360470, XM_005673954, XM_005673955, XM_005673956, XM_005673957, XM_005673958, XM_005673959, XM_005673960, XM_005673961, XM_021080769, XM_021080770, XM_021080772	X:120361162-120400388:+1	fragile X mental retardation 1	Cluster0001
FNIP1	ENSSSCG00000014269	ENSSSCT00000015591, ENSSSCT00000030991, ENSSSCT00000060769, XM_021085414, XM_021085415	2:133957553-134093383:-1	folliculin interacting protein 1	Cluster0001
FOCAD	ENSSSCG00000028406	ENSSSCT00000005693, ENSSSCT00000028872, ENSSSCT00000041034, ENSSSCT00000044086, ENSSSCT00000055841, ENSSSCT00000056267, ENSSSCT00000060666, XM_021063102, XM_021063107, XM_021063113, XM_021063125, XM_021063132, XM_021063140, XM_021063146	1:201880712-202259322:-1	focadhesin	Cluster0001
FOXJ3	ENSSSCG00000023266	ENSSSCT00000024723, ENSSSCT00000031628, ENSSSCT00000038171, XM_021096927, XM_021096928, XM_021096930, XM_021096932, XM_021096933, XM_021096934, XM_021096936	6:168994463-169135040:+1	forkhead box J3	Cluster0001
FOXN2	ENSSSCG00000029593	ENSSSCT00000025707, ENSSSCT00000057213, ENSSSCT00000064038, XM_013987897, XM_013987898, XM_021087542	3:92268786-92337180:-1	forkhead box N2	Cluster0001
FPGT	ENSSSCG00000003783	ENSSSCT00000004186	6:138940486-138950366:-1	fucose-1-phosphate guanylyltransferase	Cluster0001
FRA10AC1	ENSSSCG00000024359	ENSSSCT00000031763, ENSSSCT00000043737, ENSSSCT00000064837, XM_005671290, XM_005671293, XM_005671294, XM_013983566, XM_013983569, XM_021072007	14:105125153-105169866:-1	fragile site, folic acid type, rare, fra(10)(q23.3) or fra(10)(q24.2) candidate 1	Cluster0001
FRYL	ENSSSCG00000008826	ENSSSCT00000009658, ENSSSCT00000009659, ENSSSCT00000031947, ENSSSCT00000037122, ENSSSCT00000049673, ENSSSCT00000064649, XM_021101174, XM_021101175, XM_021101176, XM_021101178, XM_021101179, XM_021101180, XM_021101181, XM_021101182, XM_021101183, XM_021101184, XM_021101185, XM_021101186, XM_021101187, XM_021101188	8:38397687-38697194:-1	FRY like transcription coactivator	Cluster0001
FUT10	ENSSSCG00000038178	ENSSSCT00000037948, ENSSSCT00000041035, ENSSSCT00000041833, ENSSSCT00000055123, ENSSSCT00000055897, ENSSSCT00000061536, XM_021081782, XM_021081783, XM_021081784, XM_021081786, XM_021081787, XM_021081788, XM_021081790	AEMK02000697.1:4320-116874:-1	fucosyltransferase 10	Cluster0001
FYB1	ENSSSCG00000016855	ENSSSCT00000018355, ENSSSCT00000034777, ENSSSCT00000035208, ENSSSCT00000051040, ENSSSCT00000053381	16:24086959-24508504:-1	FYN binding protein 1	Cluster0001
FYTTD1	ENSSSCG00000027139	ENSSSCT00000031764, ENSSSCT00000050530, XM_003358772, XM_005670139, XM_021070193	13:134363714-134403062:+1	forty-two-three domain containing 1	Cluster0001
G3BP2	ENSSSCG00000022940	ENSSSCT00000026131, ENSSSCT00000037856, ENSSSCT00000046241, ENSSSCT00000047438, ENSSSCT00000049387, ENSSSCT00000052418, ENSSSCT00000058918, ENSSSCT00000058999, ENSSSCT00000063951, XM_003356980, XM_003356981, XM_005666759, XM_013978783, XM_021101451, XM_021101452, XM_021101453	8:71241317-71363479:-1	G3BP stress granule assembly factor 2	Cluster0001
GABPB1	ENSSSCG00000004645	ENSSSCT00000005130, ENSSSCT00000040971, ENSSSCT00000053221, ENSSSCT00000059948, XM_001928218, XM_003480365, XM_005659620, XM_013993007, XM_021095667, XM_021095672, XM_021095676, XM_021095682, XM_021095701, XM_021095723, XM_021095726	1:121412982-121488366:+1	GA binding protein transcription factor beta subunit 1	Cluster0001
GALNT1	ENSSSCG00000003743	ENSSSCT00000004144, ENSSSCT00000032735, XM_003482057, XM_021096269, XM_021096270	6:119357006-119493897:+1	polypeptide N-acetylgalactosaminyltransferase 1	Cluster0001
GAN	ENSSSCG00000002690	ENSSSCT00000002983, XM_003126840	6:6931564-6989675:-1	gigaxonin	Cluster0001
GAPVD1	ENSSSCG00000005602	ENSSSCT00000006160, ENSSSCT00000044899, ENSSSCT00000047655, ENSSSCT00000050019, ENSSSCT00000057490, ENSSSCT00000061872, XM_021068628, XM_021068631, XM_021068637, XM_021068642, XM_021068646, XM_021068648, XM_021068659, XM_021068670, XM_021068681, XM_021068692, XM_021068703, XM_021068709, XM_021068720, XM_021068728, XM_021068734, XM_021068736, XM_021068745, XM_021068756, XM_021068765, XM_021068772,…	1:265948072-266028535:+1	GTPase activating protein and VPS9 domains 1	Cluster0001
GATAD2B	ENSSSCG00000006562	ENSSSCT00000007189, ENSSSCT00000048640, ENSSSCT00000063170, XM_021089803, XM_021089804	4:95766589-95865502:+1	GATA zinc finger domain containing 2B	Cluster0001
GCC2	ENSSSCG00000008138	ENSSSCT00000008915, ENSSSCT00000060003, XM_003124853	3:47717799-47759042:-1	GRIP and coiled-coil domain containing 2	Cluster0001
GCFC2	ENSSSCG00000021287	ENSSSCT00000023923, ENSSSCT00000031635, ENSSSCT00000064852, XM_021087312, XM_021087313, XM_021087314, XM_021087315	3:67547769-67593915:+1	GC-rich sequence DNA-binding factor 2	Cluster0001
GCNT7	ENSSSCG00000007497	ENSSSCT00000008207, ENSSSCT00000051408, XM_005673033	17:57058548-57074002:-1	glucosaminyl (N-acetyl) transferase family member 7	Cluster0001
GEMIN2	ENSSSCG00000004985	ENSSSCT00000005498, ENSSSCT00000029560, XM_003121777, XM_005659903, XM_005659904, XM_005659905, XM_021101032	1:169676056-169701534:+1	gem nuclear organelle associated protein 2	Cluster0001
GEMIN5	ENSSSCG00000017066	ENSSSCT00000018581, ENSSSCT00000040991, ENSSSCT00000048964, ENSSSCT00000056153, XM_005672598, XM_005672599, XM_005672600, XM_013984899	16:68279185-68332901:+1	gem nuclear organelle associated protein 5	Cluster0001
GGPS1	ENSSSCG00000031680	ENSSSCT00000060758	14:55907893-55923989:-1	geranylgeranyl diphosphate synthase 1	Cluster0001
GHSR	ENSSSCG00000011754	ENSSSCT00000012865, ENSSSCT00000059499, XM_021068541	13:110982830-110990247:-1	growth hormone secretagogue receptor	Cluster0001
GIN1	ENSSSCG00000025287	ENSSSCT00000024159, ENSSSCT00000041620, ENSSSCT00000061672, XM_013987576, XM_021084586, XM_021084587, XM_021084588	2:108558156-108596782:-1	gypsy retrotransposon integrase 1	Cluster0001
GK5	ENSSSCG00000011677	ENSSSCT00000012783, ENSSSCT00000055833, ENSSSCT00000059059, ENSSSCT00000059628, XM_003483257, XM_021069567, XM_021069569	13:82947740-83036424:-1	glycerol kinase 5 (putative)	Cluster0001
GLCE	ENSSSCG00000026078	ENSSSCT00000022924, ENSSSCT00000055842	1:167007863-167122188:+1	glucuronic acid epimerase	Cluster0001
GLMN	ENSSSCG00000006904	ENSSSCT00000007560, ENSSSCT00000007561, ENSSSCT00000033937, ENSSSCT00000035642, XM_021090232, XM_021090233, XM_021090234, XM_021090235, XM_021090236, XM_021090237	4:124773964-124813323:+1	glomulin, FKBP associated protein	Cluster0001
GLS	ENSSSCG00000016056	ENSSSCT00000017481, ENSSSCT00000066240, XM_021076049, XM_021076050, XM_021076052, XM_021076053, XM_021076054	15:95512869-95598311:+1	glutaminase	Cluster0001
GLT6D1	ENSSSCG00000031107	ENSSSCT00000037213	AEMK02000682.1:1862180-1874294:+1	glycosyltransferase 6 domain containing 1	Cluster0001
GLYR1	ENSSSCG00000007931	ENSSSCT00000008693, ENSSSCT00000030382, ENSSSCT00000041735, XM_003354620, XM_013995678	3:37555339-37594080:+1	glyoxylate reductase 1 homolog	Cluster0001
GMEB1	ENSSSCG00000038872	ENSSSCT00000043716, ENSSSCT00000052521, ENSSSCT00000060437, XM_021095680, XM_021095681, XM_021095683, XM_021095684, XM_021095685, XM_021095686, XM_021095687	6:85657523-85701386:+1	glucocorticoid modulatory element binding protein 1	Cluster0001
GNAT2	ENSSSCG00000006823	ENSSSCT00000007474	4:110515253-110523071:+1	G protein subunit alpha transducin 2	Cluster0001
GNB4	ENSSSCG00000037583	ENSSSCT00000045231, ENSSSCT00000048231, ENSSSCT00000054082, XM_021069860	13:117444978-117523305:-1	G protein subunit beta 4	Cluster0001
GNPDA2	ENSSSCG00000008808	ENSSSCT00000009638, XM_003128949, XM_013978642	8:35192527-35219521:-1	glucosamine-6-phosphate deaminase 2	Cluster0001
GOLGB1	ENSSSCG00000011882	ENSSSCT00000012998, XM_021070274	13:138771381-138845995:+1	golgin B1	Cluster0001
GOSR1	ENSSSCG00000029262	ENSSSCT00000030283, ENSSSCT00000043406, XM_005669105	12:46541172-46597071:+1	golgi SNAP receptor complex member 1	Cluster0001
GPATCH2	ENSSSCG00000027207	ENSSSCT00000025633, ENSSSCT00000039960, ENSSSCT00000044388, XM_021064098, XM_021064099, XM_021064100, XM_021064102, XM_021064104, XM_021064105	10:7615592-7797378:-1	G-patch domain containing 2	Cluster0001
GPATCH2L	ENSSSCG00000002387	ENSSSCT00000002654, ENSSSCT00000041128, ENSSSCT00000044164, ENSSSCT00000054806, ENSSSCT00000056751, ENSSSCT00000065736, XM_005666353, XM_021097999	7:99325558-99375831:+1	G-patch domain containing 2 like	Cluster0001
GPBP1	ENSSSCG00000016922	ENSSSCT00000018429, ENSSSCT00000047569, XM_003133975, XM_005672465, XM_005672467, XM_005672468, XM_021076981, XM_021076982, XM_021076984, XM_021076985	16:36217248-36299629:+1	GC-rich promoter binding protein 1	Cluster0001
GPHN	ENSSSCG00000002285	ENSSSCT00000002545, ENSSSCT00000041451, ENSSSCT00000053538, ENSSSCT00000060902, ENSSSCT00000061076, ENSSSCT00000063633, XM_021098002, XM_021098003, XM_021098004, XM_021098005, XM_021098006, XM_021098007, XM_021098008, XM_021098009, XM_021098010, XM_021098012, XM_021098013, XM_021098014, XM_021098015, XM_021098016, XM_021098018, XM_021098019, XM_021098020, XM_021098021, XM_021098022, XM_021098024	7:90346501-90914280:+1	gephyrin	Cluster0001
GPR141	ENSSSCG00000016655	ENSSSCT00000018133	18:36611203-36662070:-1	probable G-protein coupled receptor 141	Cluster0001
GPR155	ENSSSCG00000015965	ENSSSCT00000017384, ENSSSCT00000038330, ENSSSCT00000040091, ENSSSCT00000059864, XM_003133486, XM_013990589	15:80416709-80483021:-1	G protein-coupled receptor 155	Cluster0001
GRXCR2	ENSSSCG00000040306	ENSSSCT00000052384, XM_003124061	2:147222643-147232250:-1	glutaredoxin and cysteine rich domain containing 2	Cluster0001
GSK3B	ENSSSCG00000011889	ENSSSCT00000013006, ENSSSCT00000036443, ENSSSCT00000039364, XM_021068185, XM_021068186, XM_021068187	13:140136158-140369575:+1	glycogen synthase kinase 3 beta	Cluster0001
GSTCD	ENSSSCG00000023548	ENSSSCT00000010025, XM_021101711	8:115902994-116031858:-1	glutathione S-transferase C-terminal domain containing	Cluster0001
GTDC1	ENSSSCG00000015670	ENSSSCT00000017069, ENSSSCT00000038661, ENSSSCT00000046993, ENSSSCT00000054970, ENSSSCT00000058484, ENSSSCT00000064065, XM_021074836, XM_021074837, XM_021074838, XM_021074839, XM_021074840, XM_021074841, XM_021074842, XM_021074843, XM_021074844, XM_021074845, XM_021074847, XM_021074848, XM_021074850, XM_021074851, XM_021074852, XM_021074853, XM_021074854, XM_021074855, XM_021074857, XM_021074858,…	15:7736969-8102907:+1	glycosyltransferase like domain containing 1	Cluster0001
GTF2A1	ENSSSCG00000002411	ENSSSCT00000002680, XM_021099583	7:103963245-104009302:-1	general transcription factor IIA subunit 1	Cluster0001
GTF2H1	ENSSSCG00000013367	ENSSSCT00000014599, ENSSSCT00000052595, ENSSSCT00000056070, ENSSSCT00000059779, ENSSSCT00000066142	2:40857630-40900624:-1	general transcription factor IIH subunit 1	Cluster0001
GTF2H2	.	XM_005672520, XM_013984847	.	general transcription factor IIH subunit 2	Cluster0001
GTF2I	ENSSSCG00000007721	ENSSSCT00000008466, ENSSSCT00000030268, ENSSSCT00000031896, ENSSSCT00000052444, XM_005661990, XM_005661991, XM_005661992, XM_005661993, XM_005661994, XM_021086344	3:11656922-11811423:+1	general transcription factor IIi	Cluster0001
GTF3C3	ENSSSCG00000016070	ENSSSCT00000017496, XM_001925846, XM_013982275	15:100667319-100701708:-1	general transcription factor IIIC subunit 3	Cluster0001
GTPBP8	ENSSSCG00000036952	ENSSSCT00000013048, ENSSSCT00000045292, XM_003132676, XM_005670222, XM_013982453, XM_013982454, XM_013982455	13:146909260-146932906:-1	GTP binding protein 8 (putative)	Cluster0001
GUF1	ENSSSCG00000008807	ENSSSCT00000009637, ENSSSCT00000048495, XM_003128951, XM_013978641, XM_021101163	8:35167843-35192684:+1	GUF1 homolog, GTPase	Cluster0001
GVQW3	ENSSSCG00000032157	ENSSSCT00000043599	9:10566782-10572435:+1	GVQW motif containing 3	Cluster0001
GZMK	ENSSSCG00000016901	ENSSSCT00000018406	16:34217371-34227565:+1	granzyme K	Cluster0001
HACE1	ENSSSCG00000004364	ENSSSCT00000004823, ENSSSCT00000048824, ENSSSCT00000051567, ENSSSCT00000059109, XM_021096191	1:70994036-71105046:-1	HECT domain and ankyrin repeat containing E3 ubiquitin protein ligase 1	Cluster0001
HARBI1	ENSSSCG00000013258	ENSSSCT00000014482, XM_003122827	2:15916417-15928721:+1	harbinger transposase derived 1	Cluster0001
HAUS6	ENSSSCG00000005173	ENSSSCT00000005703, XM_001928749, XM_013993527	1:203720256-203771228:+1	HAUS augmin like complex subunit 6	Cluster0001
HCFC2	ENSSSCG00000000846	ENSSSCT00000000923, ENSSSCT00000051495, XM_003126644	5:80368244-80409786:-1	host cell factor C2	Cluster0001
HDAC9	ENSSSCG00000015368	ENSSSCT00000005975, ENSSSCT00000016743, ENSSSCT00000033282, ENSSSCT00000033958, ENSSSCT00000042130, ENSSSCT00000065597, XM_021102459, XM_021102460, XM_021102461, XM_021102462, XM_021102463, XM_021102465, XM_021102466, XM_021102467, XM_021102468, XM_021102469, XM_021102470, XM_021102471, XM_021102472, XM_021102473, XM_021102474, XM_021102476, XM_021102477, XM_021102478, XM_021102479, XM_021102480,…	9:87449660-88186959:+1	histone deacetylase 9	Cluster0001
HEATR3	ENSSSCG00000039577	ENSSSCT00000044682, XM_021094219, XM_021094220	6:34706560-34759160:-1	HEAT repeat containing 3	Cluster0001
HEATR5A	ENSSSCG00000001970	ENSSSCT00000002203, XM_021099894	7:68161060-68257904:+1	HEAT repeat containing 5A	Cluster0001
HEATR5B	ENSSSCG00000008498	ENSSSCT00000009300, ENSSSCT00000037227, ENSSSCT00000039767, XM_003481246	3:103112053-103230548:+1	HEAT repeat containing 5B	Cluster0001
HELB	ENSSSCG00000000477	ENSSSCT00000000515, ENSSSCT00000052520, XM_003126364, XM_013997699	5:30645632-30696486:+1	DNA helicase B	Cluster0001
HELQ	ENSSSCG00000009236	ENSSSCT00000010115, ENSSSCT00000043082, ENSSSCT00000044598, ENSSSCT00000045578, ENSSSCT00000061867, XM_003129349, XM_013989414, XM_013989415, XM_013989419, XM_013989420, XM_013989423, XM_013989424, XM_013989426, XM_021101802	8:135026315-135061116:+1	helicase, POLQ-like	Cluster0001
HELZ	ENSSSCG00000017272	ENSSSCT00000018802, ENSSSCT00000041156, ENSSSCT00000051180, ENSSSCT00000051713, ENSSSCT00000056309, ENSSSCT00000064372, XM_021066743, XM_021066744, XM_021066745, XM_021066749, XM_021066752	12:13495008-13654937:-1	helicase with zinc finger	Cluster0001
HERC1	ENSSSCG00000004561	ENSSSCT00000005038, ENSSSCT00000026841, ENSSSCT00000044262, XM_021093938, XM_021093944, XM_021093952, XM_021093961, XM_021093969, XM_021093976, XM_021093982, XM_021093989, XM_021094000, XM_021094008, XM_021094017, XM_021094025, XM_021094031, XM_021094038, XM_021094045, XM_021094055, XM_021094060, XM_021094069, XM_021094074, XM_021094078, XM_021094084	1:108205794-108403681:+1	HECT and RLD domain containing E3 ubiquitin protein ligase family member 1	Cluster0001
HERC2	ENSSSCG00000015853	ENSSSCT00000017261, ENSSSCT00000057088, ENSSSCT00000063259, XM_021075343, XM_021075344, XM_021075345, XM_021075346, XM_021075347	15:56437557-56649117:+1	HECT and RLD domain containing E3 ubiquitin protein ligase 2	Cluster0001
HERC3	.	XM_021100749, XM_021100750, XM_021100751, XM_021100753, XM_021100754, XM_021100755, XM_021100756, XM_021100757	.	HECT and RLD domain containing E3 ubiquitin protein ligase 3	Cluster0001
HERC4	ENSSSCG00000038913	ENSSSCT00000040035, ENSSSCT00000044180, ENSSSCT00000047111, ENSSSCT00000048345, ENSSSCT00000060005, ENSSSCT00000064230, XM_021072871, XM_021072872, XM_021072873, XM_021072874, XM_021072877	14:71122792-71269729:-1	HECT and RLD domain containing E3 ubiquitin protein ligase 4	Cluster0001
HERPUD2	ENSSSCG00000027389	ENSSSCT00000024969, XM_021078631	18:38284520-38326392:+1	HERPUD family member 2	Cluster0001
HESX1	ENSSSCG00000021207	ENSSSCT00000031271, ENSSSCT00000049729, XM_021069004, XM_021069005, XM_021069006, XM_021069007	13:39044534-39088909:-1	HESX homeobox 1	Cluster0001
HIGD1C	ENSSSCG00000035326	ENSSSCT00000040745, XM_021081718	AEMK02000258.1:389828-394916:-1	HIG1 hypoxia inducible domain family member 1C	Cluster0001
HLTF	ENSSSCG00000025293	ENSSSCT00000023239, ENSSSCT00000042341, ENSSSCT00000051853, ENSSSCT00000065702, XM_003358605, XM_013991989, XM_013992040	13:89258896-89333032:-1	helicase like transcription factor	Cluster0001
HMBOX1	ENSSSCG00000009682	ENSSSCT00000010616, ENSSSCT00000010617, ENSSSCT00000059777, XM_001926736, XM_005670458, XM_005670459, XM_005670460, XM_005670461, XM_005670462, XM_005670463	14:12692447-12883426:+1	homeobox containing 1	Cluster0001
HNRNPH2	ENSSSCG00000033161	ENSSSCT00000061978, XM_021079664, XM_021079665	X:83032520-83038355:+1	heterogeneous nuclear ribonucleoprotein H2	Cluster0001
HNRNPLL	ENSSSCG00000020878	ENSSSCT00000024049, ENSSSCT00000030162, ENSSSCT00000036773, ENSSSCT00000038680, ENSSSCT00000048190, ENSSSCT00000059400, ENSSSCT00000065400, XM_021087607, XM_021087608, XM_021087609	3:101753285-101802062:+1	heterogeneous nuclear ribonucleoprotein L like	Cluster0001
HOOK3	.	XM_021077846, XM_021077847, XM_021077848, XM_021077849, XM_021077850	.	hook microtubule tethering protein 3	Cluster0001
HS3ST2	ENSSSCG00000036475	ENSSSCT00000047856, XM_003124544	3:23251941-23366324:-1	heparan sulfate-glucosamine 3-sulfotransferase 2	Cluster0001
HSPA4	ENSSSCG00000014292	ENSSSCT00000015615, ENSSSCT00000028758, ENSSSCT00000047672, XM_005661654	2:135305749-135394185:+1	heat shock protein family A (Hsp70) member 4	Cluster0001
HSPBAP1	ENSSSCG00000011873	ENSSSCT00000012987, ENSSSCT00000038953, ENSSSCT00000040798, ENSSSCT00000061022, XM_003132636, XM_005670165	13:137739144-137809274:+1	HSPB1 associated protein 1	Cluster0001
HTD2	ENSSSCG00000035452	ENSSSCT00000046433, ENSSSCT00000050996, ENSSSCT00000057307, ENSSSCT00000058752	13:40062162-40078178:+1	hydroxyacyl-thioester dehydratase type 2, mitochondrial	Cluster0001
HTR2B	ENSSSCG00000016273	ENSSSCT00000017721, ENSSSCT00000063536, XM_005672269, XM_013984563	15:131842105-131860900:-1	5-hydroxytryptamine receptor 2B	Cluster0001
HUWE1	ENSSSCG00000012328	ENSSSCT00000013481, ENSSSCT00000032330, ENSSSCT00000034630, ENSSSCT00000035055, XM_005673652, XM_013986152, XM_013986153, XM_013986154, XM_013986155, XM_013986156, XM_013986157, XM_013986158, XM_013986159, XM_013986160, XM_021080180, XM_021080182, XM_021080184, XM_021080185, XM_021080186	X:46282491-46444611:-1	HECT, UBA and WWE domain containing 1, E3 ubiquitin protein ligase	Cluster0001
ICE2	ENSSSCG00000004577	ENSSSCT00000005056, ENSSSCT00000025364, ENSSSCT00000047039, XM_001925575, XM_013992913, XM_021094409, XM_021094415, XM_021094419, XM_021094424, XM_021094430, XM_021094439, XM_021094453	1:111489168-111561911:+1	interactor of little elongation complex ELL subunit 2	Cluster0001
IFT80	ENSSSCG00000011733	ENSSSCT00000012844, ENSSSCT00000024496, ENSSSCT00000046767, ENSSSCT00000047821, ENSSSCT00000049394, ENSSSCT00000055799, ENSSSCT00000060868, XM_021069732	13:99939722-100078148:-1	intraflagellar transport 80	Cluster0001
IFT81	ENSSSCG00000009818	ENSSSCT00000010761, XM_021073040, XM_021073041, XM_021073042, XM_021073043, XM_021073044, XM_021073045	14:31425661-31615000:+1	intraflagellar transport 81	Cluster0001
IL12RB2	ENSSSCG00000003799	ENSSSCT00000004204, XM_013988878, XM_021093521, XM_021093522, XM_021093523	6:145212980-145279893:-1	interleukin 12 receptor subunit beta 2	Cluster0001
IL17RB	ENSSSCG00000037914	ENSSSCT00000037128, ENSSSCT00000049312, XM_005669645, XM_021068972	13:35947983-35966767:+1	interleukin 17 receptor B	Cluster0001
IL17RD	ENSSSCG00000011463	ENSSSCT00000012544, XM_021068996	13:38939402-39006690:-1	interleukin 17 receptor D	Cluster0001
IL2	ENSSSCG00000033267	ENSSSCT00000047936, ENSSSCT00000065532, XM_021100436	8:101640168-101649714:+1	interleukin 2	Cluster0001
IL23R	ENSSSCG00000003801	ENSSSCT00000034401, XM_021093601	6:145333822-145401731:-1	interleukin 23 receptor	Cluster0001
IL26	ENSSSCG00000039976	ENSSSCT00000051861, XM_005663966	5:32564261-32583345:-1	interleukin 26	Cluster0001
IMPACT	ENSSSCG00000003713	ENSSSCT00000004113, ENSSSCT00000044081, XM_005665327	6:109235381-109272792:+1	impact RWD domain protein	Cluster0001
INO80	ENSSSCG00000004753	ENSSSCT00000005252, ENSSSCT00000057611, XM_003121588	1:130201843-130374040:+1	INO80 complex subunit	Cluster0001
INTS2	ENSSSCG00000017673	ENSSSCT00000019237, ENSSSCT00000047797	12:36435812-36494591:+1	integrator complex subunit 2	Cluster0001
INTS6	ENSSSCG00000009384	ENSSSCT00000010282, ENSSSCT00000043398, ENSSSCT00000044667, ENSSSCT00000048274, ENSSSCT00000062775, XM_021065288, XM_021065289, XM_021065290, XM_021065291, XM_021065292	11:16372805-16468247:+1	integrator complex subunit 6	Cluster0001
INTS8	ENSSSCG00000006096	ENSSSCT00000006687, ENSSSCT00000059483, XM_003125559	4:41821848-41878690:-1	integrator complex subunit 8	Cluster0001
IPO11	ENSSSCG00000016938	ENSSSCT00000018446, ENSSSCT00000038152, ENSSSCT00000040024, ENSSSCT00000042522, ENSSSCT00000049001, ENSSSCT00000053964, XM_021077043, XM_021077044, XM_021077045	16:41121007-41522669:+1	importin 11	Cluster0001
IPO8	ENSSSCG00000000534	ENSSSCT00000000576, ENSSSCT00000042238, ENSSSCT00000046018, ENSSSCT00000051727, XM_003126400, XM_005664009	5:43099745-43182803:+1	importin 8	Cluster0001
IPPK	ENSSSCG00000030204	ENSSSCT00000008849, ENSSSCT00000025658, XM_013995782	3:42308005-42368224:-1	inositol-pentakisphosphate 2-kinase	Cluster0001
IQCF5	ENSSSCG00000033277	ENSSSCT00000062241	13:34044286-34048825:-1	IQ domain-containing protein F5	Cluster0001
IREB2	ENSSSCG00000001756	ENSSSCT00000001962	7:47481539-47529187:-1	iron responsive element binding protein 2	Cluster0001
ITCH	ENSSSCG00000007280	ENSSSCT00000007965, ENSSSCT00000036055, ENSSSCT00000036444, ENSSSCT00000041641	17:37810175-37918962:+1	itchy E3 ubiquitin protein ligase	Cluster0001
ITFG1	ENSSSCG00000033527	ENSSSCT00000041701, XM_021094239	6:37193632-37432889:+1	integrin alpha FG-GAP repeat containing 1	Cluster0001
ITGB8	ENSSSCG00000015375	ENSSSCT00000016750, ENSSSCT00000034047, ENSSSCT00000050379, ENSSSCT00000059291, XM_021101901, XM_021101902, XM_021101903, XM_021101904	9:89341141-89450696:+1	integrin subunit beta 8	Cluster0001
ITPR2	ENSSSCG00000000555	ENSSSCT00000000598, ENSSSCT00000023164, ENSSSCT00000044206, ENSSSCT00000062438, XM_021092920	5:46935923-47464125:+1	inositol 1,4,5-trisphosphate receptor type 2	Cluster0001
ITSN2	ENSSSCG00000008583	ENSSSCT00000009393, ENSSSCT00000063673, XM_021088350, XM_021088351, XM_021088352, XM_021088353, XM_021088354, XM_021088356, XM_021088357, XM_021088358, XM_021088359, XM_021088360, XM_021088361, XM_021088362, XM_021088363, XM_021088364, XM_021088365	3:114403171-114472638:+1	intersectin 2	Cluster0001
JAK2	ENSSSCG00000005215	ENSSSCT00000005748, ENSSSCT00000034494, ENSSSCT00000034678, XM_021082799, XM_021082802, XM_021082806, XM_021082809	1:216848648-217002166:-1	Janus kinase 2	Cluster0001
JHY	ENSSSCG00000015138	ENSSSCT00000016504	9:49826361-49889024:+1	junctional cadherin complex regulator	Cluster0001
JMJD1C	ENSSSCG00000010226	ENSSSCT00000011192, ENSSSCT00000051269, ENSSSCT00000053707, ENSSSCT00000063041, ENSSSCT00000065498, XM_005671027, XM_005671029, XM_005671030, XM_005671032, XM_005671035, XM_021073640, XM_021073641, XM_021073642, XM_021073643, XM_021073644, XM_021073645, XM_021073648, XM_021073649, XM_021073650, XM_021073651, XM_021073652, XM_021073654, XM_021073655, XM_021073656, XM_021073657, XM_021073659, XM_02…	14:66640849-66967077:-1	jumonji domain containing 1C	Cluster0001
JRKL	ENSSSCG00000034924	ENSSSCT00000038595	9:28407434-28412041:+1	JRK like	Cluster0001
KANSL1	ENSSSCG00000017310	ENSSSCT00000018846, ENSSSCT00000045465, ENSSSCT00000049217, ENSSSCT00000050465, ENSSSCT00000051407, ENSSSCT00000059161, ENSSSCT00000064536, XM_003131310, XM_005656940, XM_013989924, XM_013989925, XM_021066798	12:16901704-17100049:+1	KAT8 regulatory NSL complex subunit 1	Cluster0001
KAT6B	ENSSSCG00000010316	ENSSSCT00000011293, ENSSSCT00000040190, ENSSSCT00000043884, ENSSSCT00000056205, ENSSSCT00000063691, XM_005671117, XM_005671118, XM_013983356, XM_021072865, XM_021072866, XM_021072867, XM_021072868, XM_021072870	14:77404443-77597673:+1	lysine acetyltransferase 6B	Cluster0001
KATNAL1	ENSSSCG00000009326	ENSSSCT00000010220, ENSSSCT00000039810, ENSSSCT00000054714, ENSSSCT00000065982, XM_013980418, XM_021065529, XM_021065531, XM_021065532, XM_021065533, XM_021065534, XM_021065536, XM_021065537, XM_021065538, XM_021065539, XM_021065541, XM_021065542, XM_021065543, XM_021065544	11:7001310-7064592:-1	katanin catalytic subunit A1 like 1	Cluster0001
KATNBL1	ENSSSCG00000002245	ENSSSCT00000002500, XM_021098029	7:80287646-80350165:+1	katanin regulatory subunit B1 like 1	Cluster0001
KBTBD2	ENSSSCG00000022464	ENSSSCT00000026958, ENSSSCT00000041863, XM_013985724, XM_021079001	18:40604558-40637085:+1	kelch repeat and BTB domain containing 2	Cluster0001
KCNJ13	ENSSSCG00000025038	ENSSSCT00000025634, ENSSSCT00000051392, XM_021075635	15:133075775-133249630:-1	potassium voltage-gated channel subfamily J member 13	Cluster0001
KCNRG	ENSSSCG00000009388	ENSSSCT00000010287	11:17788580-17793804:-1	potassium channel regulator	Cluster0001
KDM3A	ENSSSCG00000008221	ENSSSCT00000009003, ENSSSCT00000027376, ENSSSCT00000041997, XM_003124935, XM_005662401, XM_013995985, XM_021087280, XM_021087281	3:58299723-58355000:-1	lysine demethylase 3A	Cluster0001
KDM4C	ENSSSCG00000005198	ENSSSCT00000005730, ENSSSCT00000056156, XM_021063858, XM_021063862, XM_021063866	1:215071419-215507712:-1	lysine demethylase 4C	Cluster0001
KDM6A	.	XM_021079778, XM_021079779, XM_021079780, XM_021079781, XM_021079782, XM_021079783, XM_021079784	.	lysine demethylase 6A	Cluster0001
KIAA0232	ENSSSCG00000008713	ENSSSCT00000009532, XM_021100968	8:3945345-3992328:-1	KIAA0232 ortholog	Cluster0001
KIAA0586	ENSSSCG00000005076	ENSSSCT00000005594, ENSSSCT00000023827, ENSSSCT00000026022, ENSSSCT00000046539, ENSSSCT00000051083, ENSSSCT00000063997, ENSSSCT00000064069, XM_021102647	1:187475007-187725226:+1	KIAA0586 ortholog	Cluster0001
KIAA0825	.	XM_021085377, XM_021085378, XM_021085379, XM_021085380, XM_021085381, XM_021085383	.	KIAA0825 ortholog	Cluster0001
KIAA1109	ENSSSCG00000009090	ENSSSCT00000009956, ENSSSCT00000038122, ENSSSCT00000039509, ENSSSCT00000045526, ENSSSCT00000057093, ENSSSCT00000061877, ENSSSCT00000065880, XM_021101618, XM_021101619, XM_021101620, XM_021101623, XM_021101624, XM_021101625, XM_021101626, XM_021101627, XM_021101629, XM_021101630, XM_021101631, XM_021101633, XM_021101634, XM_021101635	8:101737599-101937111:-1	KIAA1109 ortholog	Cluster0001
KIAA1143	ENSSSCG00000032344	ENSSSCT00000039182	13:27955217-27966593:-1	KIAA1143 ortholog	Cluster0001
KIAA1328	ENSSSCG00000003747	ENSSSCT00000004149, ENSSSCT00000048090, ENSSSCT00000054817, XM_021096286, XM_021096287, XM_021096289, XM_021096290, XM_021096291	6:120794841-121036285:+1	KIAA1328 ortholog	Cluster0001
KIAA1429	.	XM_021089096, XM_021089097, XM_021089098, XM_021089099, XM_021089100	.	KIAA1429 ortholog	Cluster0001
KIAA2026	ENSSSCG00000005205	ENSSSCT00000005737, ENSSSCT00000030906, ENSSSCT00000044426, XM_013993582	1:216115981-216226152:+1	KIAA2026 ortholog	Cluster0001
KIF3B	ENSSSCG00000007247	ENSSSCT00000007929, ENSSSCT00000050721, XM_021077423, XM_021077425	17:35914214-35961687:+1	kinesin family member 3B	Cluster0001
KLF12	ENSSSCG00000025130	ENSSSCT00000026048, ENSSSCT00000040861, ENSSSCT00000042308, ENSSSCT00000043538, ENSSSCT00000047737, ENSSSCT00000055878, XM_021065113, XM_021065114, XM_021065115, XM_021065116, XM_021065117, XM_021065118, XM_021065119, XM_021065120, XM_021065121, XM_021065122, XM_021065123, XM_021065124, XM_021065127	11:45988229-46446134:-1	Kruppel like factor 12	Cluster0001
KLHDC1	ENSSSCG00000032489	ENSSSCT00000044601, ENSSSCT00000051347, ENSSSCT00000061246, XM_021101379, XM_021101382, XM_021101387, XM_021101392, XM_021101403	1:179540511-179605628:+1	kelch domain containing 1	Cluster0001
KLHDC10	ENSSSCG00000027131	ENSSSCT00000018031, ENSSSCT00000027084, ENSSSCT00000044515, XM_021079113, XM_021079115	18:18667365-18723490:-1	kelch domain containing 10	Cluster0001
KLHL15	ENSSSCG00000027652	ENSSSCT00000024155, ENSSSCT00000057918, ENSSSCT00000064866, XM_021080521	X:20091904-20130017:-1	kelch like family member 15	Cluster0001
KLHL28	ENSSSCG00000004996	ENSSSCT00000005510, ENSSSCT00000039734, XM_001926290	1:175164040-175180525:-1	kelch like family member 28	Cluster0001
KLHL9	ENSSSCG00000005150	ENSSSCT00000005678	1:201589416-201591302:-1	kelch like family member 9	Cluster0001
KLK11	ENSSSCG00000038283	ENSSSCT00000049697, XM_021094838	6:55678393-55685532:-1	kallikrein related peptidase 11	Cluster0001
KLRG2	ENSSSCG00000016506	ENSSSCT00000017971, XM_003134626	18:10213507-10235900:+1	killer cell lectin like receptor G2	Cluster0001
KMT2C	ENSSSCG00000020663	ENSSSCT00000025866, ENSSSCT00000026487, ENSSSCT00000043226, ENSSSCT00000043259, ENSSSCT00000044152, ENSSSCT00000050452, ENSSSCT00000051463, ENSSSCT00000053377, XM_021079121, XM_021079122, XM_021079123, XM_021079124, XM_021079125, XM_021079126, XM_021079127, XM_021079128, XM_021079130, XM_021079131, XM_021079132, XM_021079133, XM_021079134, XM_021079135, XM_021079136, XM_021079137, XM_021079138, X…	18:4993204-5277722:+1	lysine methyltransferase 2C	Cluster0001
KMT2E	ENSSSCG00000029082	ENSSSCT00000022506, ENSSSCT00000038016, ENSSSCT00000038314, ENSSSCT00000043656, ENSSSCT00000052703, ENSSSCT00000053473, ENSSSCT00000058146, ENSSSCT00000059260, XM_013979824, XM_021102566, XM_021102567, XM_021102568, XM_021102569, XM_021102570, XM_021102571, XM_021102573, XM_021102574, XM_021102576	9:104911799-105041742:+1	lysine methyltransferase 2E	Cluster0001
KMT5B	ENSSSCG00000031459	ENSSSCT00000024630, ENSSSCT00000038627, ENSSSCT00000051185, ENSSSCT00000056668, XM_003122431, XM_021082725, XM_021082726, XM_021082728, XM_021082729, XM_021082730, XM_021082731, XM_021082732	2:4711090-4767688:+1	lysine methyltransferase 5B	Cluster0001
KPNA5	ENSSSCG00000004262	ENSSSCT00000004711, ENSSSCT00000024609, XM_005654392, XM_005654393	1:44899462-44940551:-1	karyopherin subunit alpha 5	Cluster0001
KRAS	ENSSSCG00000026969	ENSSSCT00000025989, ENSSSCT00000042185, XM_003126427, XM_005653151, XM_005653152, XM_013993780, XM_013993793	5:48508774-48549358:+1	KRAS proto-oncogene, GTPase	Cluster0001
KRIT1	.	XM_021102370, XM_021102371, XM_021102372, XM_021102373, XM_021102374, XM_021102375, XM_021102376, XM_021102377	.	KRIT1, ankyrin repeat containing	Cluster0001
KTN1	ENSSSCG00000005060	ENSSSCT00000005577, ENSSSCT00000043033, ENSSSCT00000045650, ENSSSCT00000049631, ENSSSCT00000052096, ENSSSCT00000054544, ENSSSCT00000060703, XM_021085505, XM_021085523, XM_021085571, XM_021085663, XM_021085690, XM_021085751, XM_021085852, XM_021085894, XM_021085951, XM_021086020, XM_021086082, XM_021086137	1:184881550-184990938:+1	kinectin 1	Cluster0001
L2HGDH	ENSSSCG00000005016	ENSSSCT00000005532, ENSSSCT00000058026, XM_001926818, XM_021101450	1:180022721-180069065:-1	L-2-hydroxyglutarate dehydrogenase	Cluster0001
L3MBTL3	ENSSSCG00000004203	ENSSSCT00000004644, ENSSSCT00000054860, ENSSSCT00000058280, ENSSSCT00000061211, ENSSSCT00000065993, XM_003121201, XM_003121202, XM_005659197, XM_005659198, XM_021088384, XM_021088389, XM_021088393, XM_021088399, XM_021088401, XM_021088404, XM_021088410, XM_021088414	1:33195395-33319720:-1	l(3)mbt-like 3 (Drosophila)	Cluster0001
LARP4	ENSSSCG00000028516	ENSSSCT00000000235, ENSSSCT00000025921, ENSSSCT00000034406, ENSSSCT00000034524, XM_003355385, XM_005653114, XM_005653120, XM_005653121, XM_021091644, XM_021091645, XM_021091646, XM_021091647, XM_021091648, XM_021091649, XM_021091650, XM_021091652, XM_021091653, XM_021091654, XM_021091656, XM_021091657	5:16284949-16353555:+1	La ribonucleoprotein domain family member 4	Cluster0001
LATS1	ENSSSCG00000004106	ENSSSCT00000004541, ENSSSCT00000064835, XM_005659149	1:16274843-16321581:+1	large tumor suppressor kinase 1	Cluster0001
LCLAT1	ENSSSCG00000025901	ENSSSCT00000026214, ENSSSCT00000036770, ENSSSCT00000040883, ENSSSCT00000048388	3:108690872-108882081:-1	lysocardiolipin acyltransferase 1	Cluster0001
LCOR	ENSSSCG00000010513	ENSSSCT00000011501, ENSSSCT00000011503, ENSSSCT00000040853, ENSSSCT00000041184, ENSSSCT00000042373, ENSSSCT00000047065, ENSSSCT00000047494, ENSSSCT00000052455, ENSSSCT00000059038	14:108303948-108436982:+1	ligand-dependent corepressor	Cluster0001
LCORL	ENSSSCG00000008748	ENSSSCT00000009571, ENSSSCT00000040059, ENSSSCT00000048407, ENSSSCT00000054647, ENSSSCT00000062828, ENSSSCT00000065885, XM_021100293, XM_021100294, XM_021100295, XM_021100296, XM_021100297, XM_021100298, XM_021100299, XM_021100300, XM_021100301, XM_021100302, XM_021100303	8:12806881-12969994:-1	ligand dependent nuclear receptor corepressor like	Cluster0001
LDAH	ENSSSCG00000025357	ENSSSCT00000023215, XM_005662712, XM_005662715, XM_013996307, XM_013996308, XM_013996309	3:117463827-117575717:+1	lipid droplet associated hydrolase	Cluster0001
LEKR1	ENSSSCG00000035453	ENSSSCT00000051444, XM_021069706, XM_021069707, XM_021069708	13:96675110-96676458:+1	leucine, glutamate and lysine rich 1	Cluster0001
LEMD3	ENSSSCG00000000469	ENSSSCT00000000507, ENSSSCT00000037587	5:29595883-29673875:+1	LEM domain containing 3	Cluster0001
LEPROTL1	ENSSSCG00000038085	ENSSSCT00000047780	15:54916040-54929770:-1	leptin receptor overlapping transcript like 1	Cluster0001
LIN52	ENSSSCG00000027564	ENSSSCT00000028560, XM_005656377, XM_005656378	7:97382342-97491672:+1	lin-52 DREAM MuvB core complex component	Cluster0001
LIN54	ENSSSCG00000009242	ENSSSCT00000010122, ENSSSCT00000029534, ENSSSCT00000040449, ENSSSCT00000050831, ENSSSCT00000055002, XM_013989440, XM_013989441, XM_021101860, XM_021101862, XM_021101864, XM_021101865, XM_021101867, XM_021101868, XM_021101870, XM_021101871	8:135330918-135398263:+1	lin-54 DREAM MuvB core complex component	Cluster0001
LMBRD1	ENSSSCG00000004272	ENSSSCT00000004721, ENSSSCT00000042299, XM_013992625	1:49868609-49977989:-1	LMBR1 domain containing 1	Cluster0001
LMBRD2	ENSSSCG00000016834	ENSSSCT00000018329, ENSSSCT00000037666, ENSSSCT00000043890, ENSSSCT00000048047, XM_005657606, XM_013990625, XM_013990626, XM_013990628, XM_021076987, XM_021076988, XM_021076990, XM_021076991, XM_021076992	16:21405545-21463031:-1	LMBR1 domain containing 2	Cluster0001
LNPEP	ENSSSCG00000014173	ENSSSCT00000015485, ENSSSCT00000058506	2:103567602-103661070:+1	leucyl and cystinyl aminopeptidase	Cluster0001
LOC100152218	.	XM_003356767	.	60S ribosomal protein L23a-like	Cluster0001
LOC100155468	.	XM_013990143	.	protein FAM136A	Cluster0001
LOC100511114	.	XM_003135136	.	zinc finger X-linked protein ZXDB	Cluster0001
LOC100511376	.	XM_005662337, XM_013995880, XM_013995882, XM_013995883, XM_021087106	.	E3 SUMO-protein ligase RanBP2	Cluster0001
LOC100513362	.	XM_005664913, XM_005664914	.	zinc finger protein 211-like	Cluster0001
LOC100513942	.	XM_003129985	.	olfactory receptor 148-like	Cluster0001
LOC100516390	.	XM_021064869, XM_021064870, XM_021064872, XM_021064873, XM_021064874, XM_021064875, XM_021064876, XM_021064877	.	ankyrin repeat domain-containing protein 26	Cluster0001
LOC100516424	.	XM_021084708, XM_021084709, XM_021084710, XM_021084711, XM_021084712, XM_021084713, XM_021084714, XM_021084715, XM_021084716, XM_021084717, XM_021084718, XM_021084719	.	uncharacterized LOC100516424	Cluster0001
LOC100517149	.	XM_005662211, XM_005662212, XM_013995730, XM_013995731, XM_013995732, XM_021088101, XM_021088102, XM_021088103, XM_021088104, XM_021088105, XM_021088107, XM_021088108	.	zinc finger protein 75A	Cluster0001
LOC100519166	.	XM_021081021	.	uncharacterized LOC100519166	Cluster0001
LOC100519264	.	XM_003130144, XM_021102381	.	EF-hand calcium-binding domain-containing protein 1-like	Cluster0001
LOC100523359	.	XM_013991098	.	apoptosis regulatory protein Siva	Cluster0001
LOC100523736	.	XM_003125853, XM_013997272	.	protein pitchfork-like	Cluster0001
LOC100524378	.	XM_021094778	.	zinc finger protein 420	Cluster0001
LOC100525433	.	XM_013987060, XM_021076376, XM_021076377, XM_021076378, XM_021076379, XM_021076380, XM_021076381, XM_021076382, XM_021076383, XM_021076385, XM_021076386, XM_021076387, XM_021076388, XM_021076389, XM_021076390, XM_021076391	.	zinc finger protein 705A-like	Cluster0001
LOC100620089	.	XM_013989289, XM_021101275	.	zinc finger protein 11-like	Cluster0001
LOC100621124	.	XM_021082254	.	olfactory receptor 1G1-like	Cluster0001
LOC100622980	.	XM_013992656, XM_021089548, XM_021089555	.	cytochrome b5 reductase 4	Cluster0001
LOC100627195	.	XM_021062741, XM_021062742, XM_021062743	.	protein NPAT	Cluster0001
LOC100737218	.	XM_021097382, XM_021097383	.	zinc finger protein 256	Cluster0001
LOC100737756	.	XM_021095138, XM_021095139, XM_021095140, XM_021095141	.	zinc finger protein 850-like	Cluster0001
LOC100738050	.	XM_005671004, XM_021072348, XM_021072349, XM_021072350, XM_021072351, XM_021072352, XM_021072353, XM_021072354, XM_021072355, XM_021072356, XM_021072357, XM_021072358, XM_021072359, XM_021072360, XM_021072361, XM_021072362, XM_021072363, XM_021072364, XM_021072365, XM_021072366, XM_021072367, XM_021072368, XM_021072369, XM_021072370	.	zinc finger protein 33B	Cluster0001
LOC100738280	.	XM_013998920, XM_013998921, XM_021097422	.	zinc finger protein 132-like	Cluster0001
LOC102157627	.	XM_021101675	.	uncharacterized LOC102157627	Cluster0001
LOC102158569	.	XM_013992987, XM_021095361, XM_021095379	.	RNA polymerase-associated protein LEO1-like	Cluster0001
LOC102158906	.	XM_021097268	.	protein ZNF738-like	Cluster0001
LOC102164650	.	XM_005660390, XM_013993809, XM_021068168, XM_021068169	.	protein CutA homolog	Cluster0001
LOC102166523	.	XM_013982945	.	RWD domain-containing protein 1-like	Cluster0001
LOC102167685	.	XM_021092607	.	uncharacterized LOC102167685	Cluster0001
LOC102168143	.	XM_013992889	.	40S ribosomal protein S27-like	Cluster0001
LOC106504178	.	XM_013998888, XM_013998889	.	zinc finger protein 256-like	Cluster0001
LOC106504991	.	XM_013979822	.	translation initiation factor IF-2-like	Cluster0001
LOC106505596	.	XM_021070954	.	glycine cleavage system H protein, mitochondrial-like	Cluster0001
LOC106506010	.	XM_013983252, XM_021072380, XM_021072381, XM_021072382, XM_021072383, XM_021072384	.	zinc finger protein 33B-like	Cluster0001
LOC106507363	.	XM_013987798	.	NADH dehydrogenase [ubiquinone] 1 alpha subcomplex subunit 2-like	Cluster0001
LOC106508100	.	XM_021083741, XM_021083742, XM_021083743, XM_021083744	.	zinc finger protein 791-like	Cluster0001
LOC106509590	.	XM_021084927	.	protocadherin gamma-B4-like	Cluster0001
LOC106510528	.	XM_021097135, XM_021097137, XM_021097138, XM_021097139, XM_021097140	.	zinc finger protein 461	Cluster0001
LOC106510601	.	XM_021095477	.	zinc finger protein 883-like	Cluster0001
LOC110255302	.	XM_021082081, XM_021082082	.	leucine carboxyl methyltransferase 1-like	Cluster0001
LOC110255693	.	XM_021064878	.	coiled-coil domain-containing protein 144B-like	Cluster0001
LOC110256637	.	XM_021072665, XM_021072666, XM_021072667, XM_021072668, XM_021072669	.	SMC5-SMC6 complex localization factor protein 2	Cluster0001
LOC110256864	.	XM_021074058	.	uncharacterized LOC110256864	Cluster0001
LOC110257311	.	XM_021076974	.	uncharacterized LOC110257311	Cluster0001
LOC110257476	.	XM_021078196	.	ankyrin repeat domain-containing protein 26-like	Cluster0001
LOC110257828	.	XM_021080577, XM_021080578, XM_021080579, XM_021080580, XM_021080581	.	negative regulator of P-body association	Cluster0001
LOC110259145	.	XM_021082459	.	uncharacterized LOC110259145	Cluster0001
LOC110259698	.	XM_021085417	.	uncharacterized LOC110259698	Cluster0001
LOC110260079	.	XM_021087984	.	uncharacterized LOC110260079	Cluster0001
LOC110260093	.	XM_021088112	.	zinc finger protein 75A-like	Cluster0001
LOC110260282	.	XM_021089279	.	tigger transposable element-derived protein 1-like	Cluster0001
LOC110260386	.	XM_021090293	.	DBIRD complex subunit ZNF326-like	Cluster0001
LOC110260612	.	XM_021091383	.	uncharacterized LOC110260612	Cluster0001
LOC110261288	.	XM_021097250, XM_021097251, XM_021097252, XM_021097253, XM_021097254, XM_021097255	.	zinc finger protein 836-like	Cluster0001
LOC110261304	.	XM_021097282	.	zinc finger protein 558-like	Cluster0001
LOC110261313	.	XM_021097306	.	zinc finger protein 548-like	Cluster0001
LOC110262090	.	XM_021101266, XM_021101267, XM_021101268, XM_021101269, XM_021101270, XM_021101271, XM_021101272, XM_021101273, XM_021101274	.	zinc finger protein 493-like	Cluster0001
LOC110262100	.	XM_021101306	.	rap guanine nucleotide exchange factor 6-like	Cluster0001
LRCH3	ENSSSCG00000011854	ENSSSCT00000012966, ENSSSCT00000038706, ENSSSCT00000039750, ENSSSCT00000042288, ENSSSCT00000052232, ENSSSCT00000060622, ENSSSCT00000065012, XM_005670143, XM_005670144, XM_005670145, XM_005670149, XM_013982361, XM_021070195	13:134405169-134539326:+1	leucine rich repeats and calponin homology domain containing 3	Cluster0001
LRIG2	ENSSSCG00000034581	ENSSSCT00000060304, XM_021090735, XM_021090736, XM_021090737, XM_021090738	4:107349169-107416936:-1	leucine rich repeats and immunoglobulin like domains 2	Cluster0001
LRP12	ENSSSCG00000006039	ENSSSCT00000006628, ENSSSCT00000036698, ENSSSCT00000045729, XM_003125531	4:32701641-32791374:+1	LDL receptor related protein 12	Cluster0001
LRRC14B	ENSSSCG00000033375	ENSSSCT00000038979, XM_021076932	16:79873731-79883064:-1	leucine rich repeat containing 14B	Cluster0001
LRRC58	ENSSSCG00000034616	ENSSSCT00000045509, ENSSSCT00000057648, ENSSSCT00000059422, ENSSSCT00000060298, XM_021070309	13:139927228-139951341:+1	leucine rich repeat containing 58	Cluster0001
LRRC66	ENSSSCG00000008832	ENSSSCT00000009667, ENSSSCT00000023082, ENSSSCT00000040178, XM_003128972, XM_021101208	8:39104074-39126800:-1	leucine rich repeat containing 66	Cluster0001
LRRCC1	ENSSSCG00000006146	ENSSSCT00000006739, ENSSSCT00000025998, XM_021089162, XM_021089163, XM_021089164, XM_021089165, XM_021089166, XM_021089167, XM_021089168	4:51532258-51570594:-1	leucine rich repeat and coiled-coil centrosomal protein 1	Cluster0001
LSM14A	ENSSSCG00000002869	ENSSSCT00000003170, ENSSSCT00000055533	6:43847732-43907127:+1	LSM14A, mRNA processing body assembly factor	Cluster0001
LTN1	ENSSSCG00000030528	ENSSSCT00000030539, ENSSSCT00000056141, ENSSSCT00000061785	13:192295769-192374069:-1	listerin E3 ubiquitin protein ligase 1	Cluster0001
LYRM2	ENSSSCG00000004324	ENSSSCT00000004780	1:57651684-57654886:-1	LYR motif containing 2	Cluster0001
LYRM7	ENSSSCG00000033213	ENSSSCT00000039869, ENSSSCT00000052533, ENSSSCT00000059961, XM_013995089, XM_021085418, XM_021085419, XM_021085420	2:133480180-133716619:+1	LYR motif containing 7	Cluster0001
LYSMD3	ENSSSCG00000024193	ENSSSCT00000028243, ENSSSCT00000047391, XM_003123779	2:97689376-97703742:-1	LysM domain containing 3	Cluster0001
LYST	ENSSSCG00000010151	ENSSSCT00000011115, ENSSSCT00000033787, ENSSSCT00000033939, ENSSSCT00000050051, ENSSSCT00000050254, ENSSSCT00000066064, XM_021073151, XM_021073154, XM_021073155, XM_021073156, XM_021073157, XM_021073158	14:55433018-55633484:+1	lysosomal trafficking regulator	Cluster0001
MACF1	ENSSSCG00000003654	ENSSSCT00000004050, ENSSSCT00000039184, ENSSSCT00000040898, ENSSSCT00000043147, XM_021095983	6:95150836-95304767:+1	microtubule-actin crosslinking factor 1	Cluster0001
MACO1	ENSSSCG00000030682	ENSSSCT00000029593	6:82933826-82997149:+1	macoilin 1	Cluster0001
MAGI1	ENSSSCG00000011497	ENSSSCT00000012581, ENSSSCT00000045910, ENSSSCT00000048160, ENSSSCT00000052727, ENSSSCT00000054758, ENSSSCT00000060145, XM_005669707, XM_021070785, XM_021070786, XM_021070787, XM_021070788, XM_021070789, XM_021070790, XM_021070791, XM_021070792, XM_021070793, XM_021070794, XM_021070795, XM_021070796, XM_021070797, XM_021070798, XM_021070799, XM_021070800, XM_021070801, XM_021070802, XM_021070805,…	13:46897427-47160117:-1	membrane associated guanylate kinase, WW and PDZ domain containing 1	Cluster0001
MALT1	ENSSSCG00000004917	ENSSSCT00000005425, ENSSSCT00000034163, ENSSSCT00000049658, ENSSSCT00000053114, XM_021100024	1:162076966-162145116:-1	MALT1 paracaspase	Cluster0001
MAML2	ENSSSCG00000034879	ENSSSCT00000062330, XM_021102334, XM_021102335	9:27901597-28371503:-1	mastermind like transcriptional coactivator 2	Cluster0001
MAN1A2	ENSSSCG00000006730	ENSSSCT00000007372	4:103214939-103376673:-1	mannosidase alpha class 1A member 2	Cluster0001
MAN2A1	ENSSSCG00000014195	ENSSSCT00000015510, ENSSSCT00000056127, ENSSSCT00000060059	2:114675917-114853524:+1	mannosidase alpha class 2A member 1	Cluster0001
MANSC4	ENSSSCG00000000546	ENSSSCT00000000589, ENSSSCT00000037307, XM_003126417, XM_013997771	5:45955090-45973028:+1	MANSC domain containing 4	Cluster0001
MAP10	ENSSSCG00000010167	ENSSSCT00000011133, ENSSSCT00000066134, XM_005670971	14:57969630-57972322:-1	microtubule associated protein 10	Cluster0001
MAP1LC3C	ENSSSCG00000034838	ENSSSCT00000045638, XM_003130558, XM_013980061	10:15372943-15382939:+1	microtubule associated protein 1 light chain 3 gamma	Cluster0001
MAP2K5	ENSSSCG00000004955	ENSSSCT00000005467, ENSSSCT00000024115, ENSSSCT00000036194, ENSSSCT00000054919, ENSSSCT00000060702, ENSSSCT00000065488, XM_021100434, XM_021100437, XM_021100443, XM_021100450, XM_021100460, XM_021100463, XM_021100467, XM_021100477, XM_021100478, XM_021100479, XM_021100484, XM_021100489	1:165458207-165737958:+1	mitogen-activated protein kinase kinase 5	Cluster0001
MAP3K2	ENSSSCG00000030354	ENSSSCT00000022881, ENSSSCT00000030086, ENSSSCT00000056882, XM_003359437, XM_005671635	15:25086967-25175455:+1	mitogen-activated protein kinase kinase kinase 2	Cluster0001
MAP3K7	ENSSSCG00000004334	ENSSSCT00000004790, ENSSSCT00000035193, ENSSSCT00000036555, XM_021082147	1:58481896-58548057:-1	mitogen-activated protein kinase kinase kinase 7	Cluster0001
MAP4K3	ENSSSCG00000008475	ENSSSCT00000009277, ENSSSCT00000009278, ENSSSCT00000036710, ENSSSCT00000038995, ENSSSCT00000052650, ENSSSCT00000054876, ENSSSCT00000062184, XM_021088335, XM_021088336, XM_021088337, XM_021088338, XM_021088339, XM_021088340	3:100886834-101084677:+1	mitogen-activated protein kinase kinase kinase kinase 3	Cluster0001
MAP4K5	ENSSSCG00000036634	ENSSSCT00000053912, XM_021101533, XM_021101543, XM_021101550, XM_021101552	1:180164454-180299496:-1	mitogen-activated protein kinase kinase kinase kinase 5	Cluster0001
MAPK6	ENSSSCG00000004624	ENSSSCT00000005107, ENSSSCT00000041237, ENSSSCT00000050785, XM_005659599, XM_005659601, XM_013992986, XM_021095334, XM_021095339	1:119725029-119771400:-1	mitogen-activated protein kinase 6	Cluster0001
MAPKAPK5	ENSSSCG00000009890	ENSSSCT00000010840	14:39849415-39886455:-1	mitogen-activated protein kinase-activated protein kinase 5	Cluster0001
MARCH7	ENSSSCG00000015883	ENSSSCT00000017295, ENSSSCT00000031773, ENSSSCT00000040696, ENSSSCT00000044284, ENSSSCT00000052594, ENSSSCT00000053020, ENSSSCT00000065361, XM_001928215, XM_005657534, XM_005657535, XM_021074770, XM_021074771, XM_021074773, XM_021074774, XM_021074775, XM_021074776, XM_021074777, XM_021074779, XM_021074780, XM_021074781	15:66649426-66700961:+1	membrane associated ring-CH-type finger 7	Cluster0001
MAST4	ENSSSCG00000016956	ENSSSCT00000018465, ENSSSCT00000022983, ENSSSCT00000025361, ENSSSCT00000037845, ENSSSCT00000055508, ENSSSCT00000059534, XM_013984834, XM_021076748, XM_021076749, XM_021076750, XM_021076751, XM_021076752, XM_021076753, XM_021076754, XM_021076756, XM_021076757, XM_021076758, XM_021076760, XM_021076761, XM_021076762, XM_021076763, XM_021076764, XM_021076765, XM_021076767	16:44972726-45561352:+1	microtubule associated serine/threonine kinase family member 4	Cluster0001
MBD4	ENSSSCG00000033303	ENSSSCT00000036989, ENSSSCT00000053411, ENSSSCT00000056277, ENSSSCT00000061275, XM_021069359, XM_021069360, XM_021069361	13:68814823-68828964:-1	methyl-CpG binding domain 4, DNA glycosylase	Cluster0001
MBD5	ENSSSCG00000015667	ENSSSCT00000017065, ENSSSCT00000053338, XM_021076098, XM_021076099, XM_021076101, XM_021076102, XM_021076103, XM_021076104, XM_021076105, XM_021076106, XM_021076107, XM_021076108, XM_021076109, XM_021076110, XM_021076111, XM_021076112, XM_021076113, XM_021076114, XM_021076115	15:3658230-3913196:-1	methyl-CpG binding domain protein 5	Cluster0001
MBOAT4	ENSSSCG00000015847	ENSSSCT00000017255	15:54902513-54911246:+1	membrane bound O-acyltransferase domain containing 4	Cluster0001
MBTD1	ENSSSCG00000017592	ENSSSCT00000019153, ENSSSCT00000042742, ENSSSCT00000044386, ENSSSCT00000047530, XM_005668934, XM_005668935, XM_013981060, XM_013981061, XM_013981062, XM_013981063, XM_013981064, XM_013981065, XM_013981066, XM_013981067, XM_013981068, XM_013981069, XM_013981070, XM_013981071, XM_013981072, XM_013981073, XM_013981074, XM_013981077, XM_021067216, XM_021067217, XM_021067218, XM_021067219, XM_02106722…	12:27450806-27528894:-1	mbt domain containing 1	Cluster0001
MCM9	.	XM_003353232	.	minichromosome maintenance 9 homologous recombination repair factor	Cluster0001
MDM1	.	XM_013997708	.	Mdm1 nuclear protein	Cluster0001
MDM4	ENSSSCG00000015284	ENSSSCT00000016655, ENSSSCT00000030810, ENSSSCT00000038012, XM_013989569, XM_021063227, XM_021063228	9:65174849-65216958:+1	MDM4, p53 regulator	Cluster0001
MDN1	ENSSSCG00000004328	ENSSSCT00000004784, XM_021089975	1:57661474-57826188:-1	midasin AAA ATPase 1	Cluster0001
MED13	ENSSSCG00000017672	ENSSSCT00000019236, XM_021067300	12:36333191-36429291:+1	mediator complex subunit 13	Cluster0001
MED13L	ENSSSCG00000009864	ENSSSCT00000010812, ENSSSCT00000039293, ENSSSCT00000041331, ENSSSCT00000046098, ENSSSCT00000048241, XM_021073120, XM_021073121, XM_021073122, XM_021073123, XM_021073124, XM_021073125, XM_021073126, XM_021073127	14:36063644-36383803:+1	mediator complex subunit 13 like	Cluster0001
MED21	ENSSSCG00000000552	ENSSSCT00000000595	5:46730210-46736376:-1	mediator complex subunit 21	Cluster0001
MED23	ENSSSCG00000004196	ENSSSCT00000004637, ENSSSCT00000030957, ENSSSCT00000032585, XM_021087972	1:31960024-32001581:+1	mediator complex subunit 23	Cluster0001
MED6	ENSSSCG00000034290	ENSSSCT00000039879, ENSSSCT00000066264	7:94157622-94184551:-1	mediator complex subunit 6	Cluster0001
MEF2A	ENSSSCG00000028771	ENSSSCT00000005317, ENSSSCT00000023102, ENSSSCT00000028081, ENSSSCT00000054655, ENSSSCT00000059700, ENSSSCT00000065681	1:138341158-138511314:+1	myocyte enhancer factor 2A	Cluster0001
METTL14	ENSSSCG00000009113	ENSSSCT00000009980, ENSSSCT00000045916, ENSSSCT00000065060, XM_003129231	8:105019481-105054016:-1	methyltransferase like 14	Cluster0001
METTL15	ENSSSCG00000013331	ENSSSCT00000014558, XM_005654689	2:32033207-32238752:-1	methyltransferase like 15	Cluster0001
METTL16	ENSSSCG00000017832	ENSSSCT00000019407, ENSSSCT00000050588, XM_021067617, XM_021067618, XM_021067619, XM_021067620, XM_021067621	12:48499240-48567246:-1	methyltransferase like 16	Cluster0001
METTL25	ENSSSCG00000000941	ENSSSCT00000001029, ENSSSCT00000001030, ENSSSCT00000038923, ENSSSCT00000043327, ENSSSCT00000057847, XM_021092800, XM_021092802, XM_021092803	5:99230284-99359244:-1	methyltransferase like 25	Cluster0001
METTL4	ENSSSCG00000034816	ENSSSCT00000037788, ENSSSCT00000038489, XM_021096141, XM_021096142, XM_021096143, XM_021096144, XM_021096145, XM_021096146, XM_021096147	6:104055869-104078363:+1	methyltransferase like 4	Cluster0001
METTL5	.	XM_005671918, XM_005671920, XM_005671923, XM_005671924	.	methyltransferase like 5	Cluster0001
METTL8	ENSSSCG00000015945	ENSSSCT00000017362, ENSSSCT00000037849, ENSSSCT00000039003, ENSSSCT00000039305, ENSSSCT00000042481, ENSSSCT00000043087, ENSSSCT00000043451, ENSSSCT00000049329, XM_001925591, XM_005671957, XM_005671962, XM_005671963, XM_005671965, XM_013984274, XM_021076465, XM_021076466, XM_021076467, XM_021076468	15:77474599-77565880:-1	methyltransferase like 8	Cluster0001
MFN1	ENSSSCG00000039285	ENSSSCT00000039446, XM_021068493, XM_021068494	13:117404647-117441769:+1	mitofusin 1	Cluster0001
MGA	ENSSSCG00000004739	ENSSSCT00000005235, ENSSSCT00000005236, ENSSSCT00000042707, ENSSSCT00000050299, ENSSSCT00000056991, ENSSSCT00000059374, XM_021097378	1:129594990-129697417:-1	MGA, MAX dimerization protein	Cluster0001
MGAT5	ENSSSCG00000015701	ENSSSCT00000017101, ENSSSCT00000041068, ENSSSCT00000055235, ENSSSCT00000063870, ENSSSCT00000065053, XM_021075184, XM_021075185, XM_021075186, XM_021075188, XM_021075189	15:17544802-17919559:-1	mannosyl (alpha-1,6-)-glycoprotein beta-1,6-N-acetyl-glucosaminyltransferase	Cluster0001
MIB1	ENSSSCG00000025478	ENSSSCT00000025346, ENSSSCT00000065295, XM_003356369	6:106914006-107041596:+1	mindbomb E3 ubiquitin protein ligase 1	Cluster0001
MIER1	ENSSSCG00000030423	ENSSSCT00000024138, ENSSSCT00000029681, ENSSSCT00000047796, ENSSSCT00000049924, ENSSSCT00000053204, ENSSSCT00000058649, XM_021096496, XM_021096498, XM_021096500, XM_021096502, XM_021096503, XM_021096505, XM_021096507, XM_021096508, XM_021096509, XM_021096510, XM_021096511, XM_021096512	6:145609621-145680649:-1	MIER1 transcriptional regulator	Cluster0001
MINDY2	ENSSSCG00000024131	ENSSSCT00000022531, ENSSSCT00000025255, ENSSSCT00000031003, XM_021094552	1:113172899-113258753:-1	MINDY lysine 48 deubiquitinase 2	Cluster0001
MINPP1	ENSSSCG00000010435	ENSSSCT00000011420, XM_001927672, XM_021072285	14:99574423-99628395:+1	multiple inositol-polyphosphate phosphatase 1	Cluster0001
MIPOL1	ENSSSCG00000039714	ENSSSCT00000023477, ENSSSCT00000040658, ENSSSCT00000043917, ENSSSCT00000055718, XM_021099131, XM_021099132, XM_021099133, XM_021099134, XM_021099135, XM_021099136, XM_021099137, XM_021099138, XM_021099139	7:62515075-62796051:-1	mirror-image polydactyly 1	Cluster0001
MIS12	ENSSSCG00000034958	ENSSSCT00000042182, XM_021067725, XM_021067726, XM_021067727	12:51505169-51508260:-1	MIS12, kinetochore complex component	Cluster0001
MITD1	ENSSSCG00000008185	ENSSSCT00000008964, XM_021087196	3:55054517-55069867:+1	microtubule interacting and trafficking domain containing 1	Cluster0001
MKLN1	ENSSSCG00000016549	ENSSSCT00000018019, ENSSSCT00000060927, ENSSSCT00000064864, XM_013990796, XM_021078930, XM_021078931, XM_021078932, XM_021078933, XM_021078934, XM_021078935, XM_021078936	18:17504858-17832503:-1	muskelin 1	Cluster0001
MLH3	ENSSSCG00000002378	ENSSSCT00000002644, ENSSSCT00000044140, ENSSSCT00000045183, ENSSSCT00000050288, ENSSSCT00000055483, ENSSSCT00000059831, ENSSSCT00000060904, ENSSSCT00000064099	7:98218807-98259624:-1	acylphosphatase 1	Cluster0001
MLLT10	ENSSSCG00000011085	ENSSSCT00000012132, ENSSSCT00000040886, ENSSSCT00000048220, ENSSSCT00000049894, ENSSSCT00000050792, ENSSSCT00000051729, ENSSSCT00000052589, ENSSSCT00000062642, ENSSSCT00000064367, ENSSSCT00000065696, XM_003130784, XM_021064920, XM_021064921, XM_021064922, XM_021064923, XM_021064924, XM_021064925, XM_021064926, XM_021064927, XM_021064928, XM_021064929, XM_021064930, XM_021064931, XM_021064933, XM_…	10:53069736-53316041:-1	myeloid/lymphoid or mixed-lineage leukemia; translocated to, 10	Cluster0001
MMGT1	ENSSSCG00000025854	ENSSSCT00000029855	X:111145712-111158474:-1	membrane magnesium transporter 1	Cluster0001
MNAT1	ENSSSCG00000005090	ENSSSCT00000005610, XM_021064622, XM_021064673	1:189690344-189910589:+1	MNAT1, CDK activating kinase assembly factor	Cluster0001
MOB1B	.	XM_003129073, XM_021100592, XM_021100593, XM_021100594	.	MOB kinase activator 1B	Cluster0001
MOBKL3	ENSSSCG00000016079	ENSSSCT00000017507	15:101390834-101420885:+1	MOB family member 4, phocein	Cluster0001
MON2	ENSSSCG00000000458	ENSSSCT00000000494, ENSSSCT00000039671, ENSSSCT00000041357, ENSSSCT00000047696, ENSSSCT00000050175, XM_021091923, XM_021091924, XM_021091925, XM_021091926, XM_021091927, XM_021091929, XM_021091930, XM_021091931, XM_021091932, XM_021091933, XM_021091934, XM_021091935	5:27126040-27241940:+1	MON2 homolog, regulator of endosome-to-Golgi trafficking	Cluster0001
MPHOSPH9	ENSSSCG00000009779	ENSSSCT00000010721, ENSSSCT00000025142, ENSSSCT00000040904, ENSSSCT00000053306, ENSSSCT00000055081, XM_013982787, XM_013982788, XM_013982789, XM_013982790, XM_021074059, XM_021074060, XM_021074061, XM_021074062, XM_021074063	14:29658767-29728211:+1	M-phase phosphoprotein 9	Cluster0001
MPIG6B	ENSSSCG00000034664	ENSSSCT00000038756, ENSSSCT00000047520, ENSSSCT00000066401, XM_021098455	7:23829506-23838637:+1	megakaryocyte and platelet inhibitory receptor G6b	Cluster0001
MPST	ENSSSCG00000038190	ENSSSCT00000037349, ENSSSCT00000062112, XM_013997539, XM_021091532	5:10736051-10749752:-1	mercaptopyruvate sulfurtransferase	Cluster0001
MSANTD1	ENSSSCG00000040111	ENSSSCT00000046635, ENSSSCT00000052009, XM_013978508	8:1938397-1947985:+1	Myb/SANT DNA binding domain containing 1	Cluster0001
MSH3	ENSSSCG00000014126	ENSSSCT00000015430, ENSSSCT00000044915, XM_021084495	2:89255554-89452223:+1	mutS homolog 3	Cluster0001
MSI2	ENSSSCG00000038505	ENSSSCT00000036438, ENSSSCT00000037980, ENSSSCT00000044888, ENSSSCT00000059213, ENSSSCT00000061073, ENSSSCT00000064756, XM_021066167, XM_021066168, XM_021066169, XM_021066170, XM_021066171, XM_021066172, XM_021066173, XM_021066174, XM_021066175, XM_021066176, XM_021066177	12:33536327-33975556:+1	musashi RNA binding protein 2	Cluster0001
MSL2	ENSSSCG00000011650	ENSSSCT00000012752, XM_001927762, XM_021069488	13:77146315-77180769:-1	male-specific lethal 2 homolog (Drosophila)	Cluster0001
MTDH	ENSSSCG00000006084	ENSSSCT00000006675, ENSSSCT00000040545, ENSSSCT00000052010, XM_005655347, XM_005655348	4:39051468-39113899:-1	metadherin	Cluster0001
MTERF1	ENSSSCG00000015309	ENSSSCT00000016682, ENSSSCT00000039655, ENSSSCT00000046737, ENSSSCT00000049326, ENSSSCT00000051628, ENSSSCT00000064264	9:71845662-71853853:-1	mitochondrial transcription termination factor 1	Cluster0001
MTERF2	ENSSSCG00000039109	ENSSSCT00000057294, ENSSSCT00000059227, XM_021091566	5:13365676-13377519:+1	mitochondrial transcription termination factor 2	Cluster0001
MTERF3	ENSSSCG00000006090	ENSSSCT00000006681, ENSSSCT00000041831, ENSSSCT00000048089, XM_001929271, XM_005662952, XM_021089076, XM_021089077	4:40375990-40401167:+1	mitochondrial transcription termination factor 3	Cluster0001
MTFMT	ENSSSCG00000004543	ENSSSCT00000005018, XM_005659485, XM_013992885	1:106970635-107001118:+1	mitochondrial methionyl-tRNA formyltransferase	Cluster0001
MTIF2	ENSSSCG00000008404	ENSSSCT00000009201, ENSSSCT00000051676, ENSSSCT00000058866, ENSSSCT00000064578, XM_013996153, XM_013996157, XM_021087524, XM_021087525, XM_021087526, XM_021087527, XM_021087528, XM_021087530	3:85948550-85992911:+1	mitochondrial translational initiation factor 2	Cluster0001
MTOR	ENSSSCG00000003413	ENSSSCT00000003786, ENSSSCT00000049073, ENSSSCT00000052098, ENSSSCT00000054206, ENSSSCT00000055666, XM_003127584	6:71285103-71448662:-1	mechanistic target of rapamycin	Cluster0001
MTPAP	ENSSSCG00000011018	ENSSSCT00000012060, ENSSSCT00000048465	10:40764363-40793380:+1	mitochondrial poly(A) polymerase	Cluster0001
MTRF1	ENSSSCG00000009436	ENSSSCT00000010343, ENSSSCT00000058161, ENSSSCT00000062595, XM_021065101, XM_021065102, XM_021065103	11:25603779-25642049:+1	mitochondrial translation release factor 1	Cluster0001
MTRF1L	ENSSSCG00000004076	ENSSSCT00000004505, XM_013992473, XM_013992474, XM_021072417	1:13446492-13458290:+1	mitochondrial translational release factor 1 like	Cluster0001
MTX3	ENSSSCG00000014116	ENSSSCT00000015420, ENSSSCT00000029307, ENSSSCT00000049799, ENSSSCT00000053978, XM_013994940, XM_013994941, XM_013994943	2:88667294-88680947:-1	metaxin 3	Cluster0001
MYCBP2	ENSSSCG00000009473	ENSSSCT00000010386, ENSSSCT00000043213, ENSSSCT00000044438, ENSSSCT00000051420, ENSSSCT00000065466, XM_021065732, XM_021065733, XM_021065734, XM_021065735, XM_021065736, XM_021065737, XM_021065738, XM_021065739, XM_021065740, XM_021065741, XM_021065742, XM_021065743, XM_021065744, XM_021065745, XM_021065746, XM_021065747, XM_021065748, XM_021065749, XM_021065750, XM_021065751, XM_021065752	11:49164685-49396395:-1	MYC binding protein 2, E3 ubiquitin protein ligase	Cluster0001
MYNN	ENSSSCG00000026829	ENSSSCT00000029120, ENSSSCT00000032001, XM_005669990	13:108435189-108451888:+1	myoneurin	Cluster0001
MYO9A	ENSSSCG00000004979	ENSSSCT00000005491, ENSSSCT00000036741, ENSSSCT00000038413, ENSSSCT00000050576, ENSSSCT00000057674, XM_021100877, XM_021100886, XM_021100896, XM_021100901, XM_021100912, XM_021100919, XM_021100928, XM_021100935, XM_021100939, XM_021100941, XM_021100946, XM_021100948, XM_021100955, XM_021100965, XM_021100967, XM_021100971, XM_021100980, XM_021100985, XM_021100994, XM_021101004, XM_021101009	1:169373981-169597167:-1	myosin IXA	Cluster0001
MYSM1	ENSSSCG00000003830	ENSSSCT00000004239, ENSSSCT00000040154, ENSSSCT00000042998, ENSSSCT00000048732, XM_021096567, XM_021096568, XM_021096569, XM_021096570, XM_021096571, XM_021096572, XM_021096574, XM_021096575	6:153755746-153795535:+1	Myb like, SWIRM and MPN domains 1	Cluster0001
N4BP2	ENSSSCG00000008792	ENSSSCT00000009619, XM_021101117	8:31231943-31284621:+1	NEDD4 binding protein 2	Cluster0001
NAA15	ENSSSCG00000009061	ENSSSCT00000009925, ENSSSCT00000043966, XM_003129186, XM_005656536	8:87607957-87691313:-1	N(alpha)-acetyltransferase 15, NatA auxiliary subunit	Cluster0001
NAA16	ENSSSCG00000009435	ENSSSCT00000010342, ENSSSCT00000037355, ENSSSCT00000040117, ENSSSCT00000043268, ENSSSCT00000056551, ENSSSCT00000057964, ENSSSCT00000063298, XM_003482898, XM_021065626, XM_021065627, XM_021065628, XM_021065629, XM_021065630, XM_021065631, XM_021065632	11:25528896-25595133:-1	N(alpha)-acetyltransferase 16, NatA auxiliary subunit	Cluster0001
NAA25	ENSSSCG00000009887	ENSSSCT00000010837, ENSSSCT00000027618, ENSSSCT00000059448, ENSSSCT00000062454	14:39579503-39682469:+1	N(alpha)-acetyltransferase 25, NatB auxiliary subunit	Cluster0001
NAB1	ENSSSCG00000029547	ENSSSCT00000026187, ENSSSCT00000036736, ENSSSCT00000042698, XM_021076055, XM_021076056, XM_021076057, XM_021076058	15:95248755-95295081:+1	NGFI-A binding protein 1	Cluster0001
NAE1	ENSSSCG00000035639	ENSSSCT00000052701, ENSSSCT00000062562, XM_021094010	6:27503833-27540045:-1	NEDD8 activating enzyme E1 subunit 1	Cluster0001
NAPEPLD	ENSSSCG00000022903	ENSSSCT00000016793, ENSSSCT00000016799, ENSSSCT00000061651, ENSSSCT00000061699, XM_003130240, XM_021102560, XM_021102561, XM_021102562	9:103210771-103262902:-1	N-acyl phosphatidylethanolamine phospholipase D	Cluster0001
NBEAL1	.	XM_021075103, XM_021075104, XM_021075105, XM_021075106, XM_021075108, XM_021075109, XM_021075110	.	neurobeachin like 1	Cluster0001
NBN	ENSSSCG00000006127	ENSSSCT00000006719, ENSSSCT00000033100, ENSSSCT00000035696, ENSSSCT00000039740, ENSSSCT00000043550, ENSSSCT00000047583, XM_021089136, XM_021089137	4:46787470-46903999:+1	nibrin	Cluster0001
NEDD1	ENSSSCG00000000890	ENSSSCT00000000974, ENSSSCT00000039030, ENSSSCT00000041043, ENSSSCT00000053878, XM_021092727, XM_021092729	5:86693818-86737265:-1	neural precursor cell expressed, developmentally down-regulated 1	Cluster0001
NEK1	ENSSSCG00000009714	ENSSSCT00000010650, ENSSSCT00000010651, ENSSSCT00000037030, ENSSSCT00000042806, ENSSSCT00000053967, XM_013982714, XM_013982715, XM_013982716, XM_013982717, XM_013982718, XM_013982719, XM_013982720, XM_013982721, XM_013982722, XM_021072839, XM_021072840, XM_021072842, XM_021072843, XM_021072845, XM_021072846, XM_021072847, XM_021072849, XM_021072850, XM_021072851, XM_021072852, XM_021072853	14:20144601-20332251:+1	NIMA related kinase 1	Cluster0001
NEK4	ENSSSCG00000011446	ENSSSCT00000012526, ENSSSCT00000038250, ENSSSCT00000041332, ENSSSCT00000042456, ENSSSCT00000054306, XM_021068929, XM_021068930, XM_021068931, XM_021068932, XM_021068933, XM_021068934, XM_021068935, XM_021068937, XM_021068938, XM_021068939, XM_021068940, XM_021068941, XM_021068942, XM_021068943, XM_021068944, XM_021068945, XM_021068946	13:34839363-34896525:-1	NIMA related kinase 4	Cluster0001
NEMF	ENSSSCG00000005011	ENSSSCT00000005527, ENSSSCT00000027331, XM_001924630, XM_021101414	1:179624624-179671288:-1	nuclear export mediator factor	Cluster0001
NF1	ENSSSCG00000017748	ENSSSCT00000019317, XM_021067460	12:43490814-43753770:-1	neurofibromin 1	Cluster0001
NFAT5	ENSSSCG00000002755	ENSSSCT00000003052, ENSSSCT00000033936, ENSSSCT00000034601, ENSSSCT00000037905, ENSSSCT00000045027, ENSSSCT00000049049, ENSSSCT00000056075, ENSSSCT00000062731, ENSSSCT00000063448, ENSSSCT00000066307, XM_003355770, XM_003355771, XM_005655768, XM_005655769, XM_005655770, XM_013988501, XM_013988503, XM_013988506, XM_013988508, XM_021093866, XM_021093867, XM_021093868, XM_021093869, XM_021093870, XM_…	6:17313413-17434951:-1	nuclear factor of activated T-cells 5	Cluster0001
NHLRC2	ENSSSCG00000010645	ENSSSCT00000011644	14:124162492-124239727:+1	NHL repeat containing 2	Cluster0001
NHLRC3	ENSSSCG00000037746	ENSSSCT00000037975, ENSSSCT00000043055, ENSSSCT00000044811, ENSSSCT00000045173, ENSSSCT00000060985	11:14184134-14370915:+1	NHL repeat containing 3	Cluster0001
NIN	ENSSSCG00000005022	ENSSSCT00000005538, ENSSSCT00000032295, ENSSSCT00000038837, ENSSSCT00000040667, ENSSSCT00000041637, ENSSSCT00000045235, ENSSSCT00000053603, ENSSSCT00000060723, ENSSSCT00000062524, XM_021101651, XM_021101655, XM_021101658, XM_021101660, XM_021101669, XM_021101671, XM_021101674, XM_021101678, XM_021101685, XM_021101688, XM_021101690, XM_021101696, XM_021101701, XM_021101710, XM_021101716, XM_021101…	1:180479612-180553674:-1	ninein	Cluster0001
NIPAL2	ENSSSCG00000031267	ENSSSCT00000062458, XM_003125547	4:38491243-38587448:+1	NIPA like domain containing 2	Cluster0001
NIPBL	ENSSSCG00000016842	ENSSSCT00000018339, ENSSSCT00000038335, ENSSSCT00000055899, ENSSSCT00000060078, ENSSSCT00000060510, ENSSSCT00000062716, XM_013984737, XM_021076590, XM_021076591, XM_021076593	16:22152469-22363821:+1	NIPBL, cohesin loading factor	Cluster0001
NKTR	ENSSSCG00000011284	ENSSSCT00000012354, ENSSSCT00000037714, ENSSSCT00000040672, ENSSSCT00000043993, ENSSSCT00000044830, ENSSSCT00000051375, ENSSSCT00000054499, ENSSSCT00000061772, ENSSSCT00000065120, XM_003132134, XM_005669406, XM_005669411, XM_005669412, XM_021071701, XM_021071702, XM_021071703, XM_021071704, XM_021071705, XM_021071706	13:26125110-26176400:+1	natural killer cell triggering receptor	Cluster0001
NLRX1	ENSSSCG00000015113	ENSSSCT00000016479, ENSSSCT00000016480, ENSSSCT00000053071, ENSSSCT00000061161, ENSSSCT00000062585, ENSSSCT00000062953, ENSSSCT00000063585, ENSSSCT00000065430, XM_005667404, XM_005667405, XM_021102056, XM_021102057, XM_021102058	9:46363928-46400749:+1	NLR family member X1	Cluster0001
NMBR	ENSSSCG00000036250	ENSSSCT00000042834, XM_021063332	1:22971977-22991686:+1	neuromedin B receptor	Cluster0001
NMD3	ENSSSCG00000022952	ENSSSCT00000024911, ENSSSCT00000048423, ENSSSCT00000065835, XM_021069741, XM_021069742, XM_021069744	13:100924633-100991988:+1	NMD3 ribosome export adaptor	Cluster0001
NME7	ENSSSCG00000006294	ENSSSCT00000006898, ENSSSCT00000036864, ENSSSCT00000054580, ENSSSCT00000063322, XM_021089439, XM_021089440, XM_021089442	4:81639167-81915931:+1	NME/NM23 family member 7	Cluster0001
NOC3L	ENSSSCG00000010484	ENSSSCT00000011472, ENSSSCT00000032028, XM_021072030	14:105769555-105806339:-1	NOC3 like DNA replication regulator	Cluster0001
NOL8	ENSSSCG00000008069	ENSSSCT00000008842, ENSSSCT00000047806, XM_013995776, XM_021086989, XM_021086990	3:42024373-42053711:-1	nucleolar protein 8	Cluster0001
NPAT	ENSSSCG00000026959	ENSSSCT00000027557, ENSSSCT00000028182, ENSSSCT00000046664, ENSSSCT00000066034	9:36554670-36620511:-1	protein NPAT	Cluster0001
NPHP3	.	XM_021069458, XM_021069459, XM_021069460, XM_021069461, XM_021069462, XM_021069463	.	nephrocystin 3	Cluster0001
NR2C2	ENSSSCG00000011594	ENSSSCT00000012690, ENSSSCT00000057618, XM_003132387, XM_005669805	13:69466291-69576914:-1	nuclear receptor subfamily 2 group C member 2	Cluster0001
NRF1	ENSSSCG00000016566	ENSSSCT00000018036, ENSSSCT00000027878, ENSSSCT00000045355, ENSSSCT00000048237, XM_021078996, XM_021078997, XM_021078998, XM_021078999, XM_021079000	18:19008420-19142666:-1	nuclear respiratory factor 1	Cluster0001
NRIP1	ENSSSCG00000021038	ENSSSCT00000028007, ENSSSCT00000037452, XM_013982535, XM_021070820	13:179826141-179915149:-1	nuclear receptor interacting protein 1	Cluster0001
NSD1	ENSSSCG00000014044	ENSSSCT00000015341, ENSSSCT00000053942, ENSSSCT00000055036, ENSSSCT00000059399, ENSSSCT00000061395, ENSSSCT00000066090, XM_021084398, XM_021084399, XM_021084400, XM_021084401, XM_021084402, XM_021084404, XM_021084405, XM_021084406, XM_021084407, XM_021084408, XM_021084409	2:80654373-80809689:-1	nuclear receptor binding SET domain protein 1	Cluster0001
NSD3	ENSSSCG00000015820	ENSSSCT00000017228, ENSSSCT00000039934, ENSSSCT00000047326, ENSSSCT00000051362, ENSSSCT00000053196, ENSSSCT00000061612, XM_013984071, XM_021075907, XM_021075908, XM_021075909, XM_021075910, XM_021075912, XM_021075913, XM_021075914, XM_021075915, XM_021075916	15:48136362-48241800:+1	nuclear receptor binding SET domain protein 3	Cluster0001
NSL1	ENSSSCG00000015593	ENSSSCT00000016986, XM_021063971	9:130622331-130668933:+1	NSL1, MIS12 kinetochore complex component	Cluster0001
NUDT21	ENSSSCG00000034521	ENSSSCT00000036721	6:29339841-29363300:+1	nudix hydrolase 21	Cluster0001
NUFIP2	ENSSSCG00000017785	ENSSSCT00000019357, ENSSSCT00000045233, ENSSSCT00000053347	12:45479109-45507024:-1	nuclear FMR1 interacting protein 2	Cluster0001
NUP153	ENSSSCG00000026034	ENSSSCT00000025406, ENSSSCT00000044984, ENSSSCT00000047490, ENSSSCT00000062257, XM_001926651, XM_013977453, XM_013977458	7:13393535-13466582:-1	nucleoporin 153	Cluster0001
NXNL1	ENSSSCG00000040328	ENSSSCT00000065552, XM_003354140	2:60244606-60253586:+1	nucleoredoxin-like 1	Cluster0001
OCRL	ENSSSCG00000012650	ENSSSCT00000013831, ENSSSCT00000035468, ENSSSCT00000036143, ENSSSCT00000043719, XM_021079694, XM_021079695, XM_021079696	X:106135335-106192320:+1	OCRL, inositol polyphosphate-5-phosphatase	Cluster0001
ODF2L	ENSSSCG00000006936	ENSSSCT00000007599, ENSSSCT00000007600, ENSSSCT00000048203, ENSSSCT00000057473, ENSSSCT00000062333, XM_005663730, XM_005663731, XM_013997450, XM_013997451, XM_013997452, XM_013997453, XM_021090775, XM_021090776, XM_021090777, XM_021090778, XM_021090780, XM_021090781, XM_021090782	4:129476422-129804203:+1	outer dense fiber of sperm tails 2 like	Cluster0001
ODR4	ENSSSCG00000015577	ENSSSCT00000016970	9:127540486-127580978:+1	odr-4 GPCR localization factor homolog	Cluster0001
OGA	ENSSSCG00000010569	ENSSSCT00000011561, ENSSSCT00000038930, ENSSSCT00000039103, ENSSSCT00000046580, ENSSSCT00000050574, ENSSSCT00000052888	14:112822409-112851442:-1	O-GlcNAcase	Cluster0001
OPHN1	ENSSSCG00000022676	ENSSSCT00000033803, XM_021080299, XM_021080300, XM_021080301, XM_021080302, XM_021080303, XM_021080304	X:54057017-54616924:-1	oligophrenin 1	Cluster0001
ORC2	ENSSSCG00000016098	ENSSSCT00000017527, ENSSSCT00000049523, ENSSSCT00000059684, XM_021074956	15:104610357-104656553:-1	origin recognition complex subunit 2	Cluster0001
ORC3	ENSSSCG00000004306	ENSSSCT00000004761, ENSSSCT00000037698, ENSSSCT00000044632, XM_003121290, XM_021089812, XM_021089821, XM_021089832	1:55954149-56044246:+1	origin recognition complex subunit 3	Cluster0001
ORC4	ENSSSCG00000015668	ENSSSCT00000017066, ENSSSCT00000042728, ENSSSCT00000046525, XM_005671603, XM_005671604, XM_005671606, XM_013983928, XM_021076117, XM_021076118, XM_021076119, XM_021076120, XM_021076121, XM_021076123	15:4096539-4176080:+1	origin recognition complex subunit 4	Cluster0001
OSBPL8	ENSSSCG00000027503	ENSSSCT00000000566, ENSSSCT00000029484, ENSSSCT00000046802, ENSSSCT00000048486, ENSSSCT00000049557, ENSSSCT00000057968, XM_005655647, XM_013988326, XM_013988327, XM_021092052, XM_021092053, XM_021092054	5:39545743-39744655:-1	oxysterol binding protein like 8	Cluster0001
OSGEPL1	ENSSSCG00000016043	ENSSSCT00000017468, ENSSSCT00000057158, ENSSSCT00000059005, ENSSSCT00000062823, ENSSSCT00000064692, XM_013984339, XM_021075402, XM_021075405	15:94329901-94351558:-1	O-sialoglycoprotein endopeptidase like 1	Cluster0001
OSTN	ENSSSCG00000031478	ENSSSCT00000059041	13:128530677-128576136:+1	osteocrin	Cluster0001
OTUD3	ENSSSCG00000039652	ENSSSCT00000047279, XM_021095471, XM_021095472	6:78241624-78273539:+1	OTU deubiquitinase 3	Cluster0001
OTUD4	ENSSSCG00000009042	ENSSSCT00000009902, ENSSSCT00000044496, XM_021100662	8:83240174-83288234:+1	OTU deubiquitinase 4	Cluster0001
OTUD6B	ENSSSCG00000006120	ENSSSCT00000006712, XM_003125574	4:45776588-45793161:-1	OTU domain containing 6B	Cluster0001
OXSR1	ENSSSCG00000011253	ENSSSCT00000012320, XM_021068550	13:23020484-23116957:+1	oxidative stress responsive 1	Cluster0001
PAK2	ENSSSCG00000011843	ENSSSCT00000012955, XM_021070137, XM_021070138	13:133278877-133383452:-1	p21 (RAC1) activated kinase 2	Cluster0001
PAN2	ENSSSCG00000000393	ENSSSCT00000000424, ENSSSCT00000038548, ENSSSCT00000040880, ENSSSCT00000046573, ENSSSCT00000051504, ENSSSCT00000055361, XM_001929293, XM_005655618, XM_005655619, XM_013988315, XM_021092864, XM_021092865, XM_021092866, XM_021092867, XM_021092868, XM_021092870, XM_021092871, XM_021092872, XM_021092873, XM_021092874, XM_021092875	5:21710772-21748950:-1	PAN2 poly(A) specific ribonuclease subunit	Cluster0001
PAN3	ENSSSCG00000009319	ENSSSCT00000010210, ENSSSCT00000041753, ENSSSCT00000045308, ENSSSCT00000052848, ENSSSCT00000063523, XM_005668295, XM_005668299, XM_013980413	11:5487337-5611652:+1	PAN3 poly(A) specific ribonuclease subunit	Cluster0001
PANK2	ENSSSCG00000007142	ENSSSCT00000007814, ENSSSCT00000040048, XM_005672769, XM_005672770, XM_013985149, XM_021078058, XM_021078059, XM_021078060, XM_021078061	17:31798780-31829161:-1	pantothenate kinase 2	Cluster0001
PANK3	ENSSSCG00000017014	ENSSSCT00000018526, ENSSSCT00000058020, XM_021077093	16:55313484-55340067:+1	pantothenate kinase 3	Cluster0001
PAPOLA	.	XM_001929075, XM_021099679, XM_021099680, XM_021099681, XM_021099682, XM_021099683, XM_021099684, XM_021099685	.	poly(A) polymerase alpha	Cluster0001
PAPOLG	ENSSSCG00000008389	ENSSSCT00000009186, ENSSSCT00000054449, ENSSSCT00000065722, XM_013996138	3:80989887-81025336:-1	poly(A) polymerase gamma	Cluster0001
PARG	ENSSSCG00000010396	ENSSSCT00000011380, ENSSSCT00000063100, XM_005671221, XM_005671222, XM_013983451, XM_013983452	14:90338508-90480991:-1	poly(ADP-ribose) glycohydrolase	Cluster0001
PARN	ENSSSCG00000007878	ENSSSCT00000008633, ENSSSCT00000037222, ENSSSCT00000051626, ENSSSCT00000053722, XM_021086561, XM_021086563, XM_021086564	3:28616808-28802505:+1	poly(A)-specific ribonuclease	Cluster0001
PAXBP1	ENSSSCG00000012037	ENSSSCT00000013169, XM_003132753	13:196336959-196371263:-1	PAX3 and PAX7 binding protein 1	Cluster0001
PBRM1	ENSSSCG00000035824	ENSSSCT00000041273, ENSSSCT00000044065, ENSSSCT00000048799, ENSSSCT00000057913, ENSSSCT00000058421, ENSSSCT00000058608, ENSSSCT00000059908, XM_021068902, XM_021068903, XM_021068904, XM_021068905, XM_021068906, XM_021068908, XM_021068909, XM_021068911, XM_021068912, XM_021068913, XM_021068914, XM_021068915, XM_021068916, XM_021068917, XM_021068918, XM_021068919, XM_021068920, XM_021068921, XM_0210…	13:34689711-34820952:-1	polybromo 1	Cluster0001
PBX1	ENSSSCG00000006331	ENSSSCT00000006939, ENSSSCT00000042595, ENSSSCT00000043973, ENSSSCT00000053615, XM_001927886, XM_003355078, XM_005655372, XM_005655374, XM_013988079	4:85821494-86170191:-1	PBX homeobox 1	Cluster0001
PCDHA13	ENSSSCG00000028030	ENSSSCT00000030968, ENSSSCT00000056227	2:142547430-142553513:+1	protocadherin alpha-13	Cluster0001
PCDHGA10	ENSSSCG00000021051	ENSSSCT00000022662	2:143050428-143060768:+1	protocadherin gamma subfamily A, 10	Cluster0001
PCDHGB5	ENSSSCG00000023485	ENSSSCT00000023828	2:143036876-143039295:+1	protocadherin gamma subfamily B, 5	Cluster0001
PCF11	ENSSSCG00000014901	ENSSSCT00000016256, ENSSSCT00000043941, XM_003129708, XM_013979192, XM_021062577, XM_021062578	9:17297867-17324710:+1	PCF11 cleavage and polyadenylation factor subunit	Cluster0001
PCGF5	.	XM_003133143, XM_005671277, XM_013983547, XM_021073243, XM_021073244, XM_021073245, XM_021073246, XM_021073247	.	polycomb group ring finger 5	Cluster0001
PCM1	ENSSSCG00000006994	ENSSSCT00000007659, ENSSSCT00000048607, ENSSSCT00000049226, ENSSSCT00000052942, ENSSSCT00000055887, ENSSSCT00000060136, ENSSSCT00000065244, XM_021077902, XM_021077903, XM_021077904, XM_021077905, XM_021077906, XM_021077907, XM_021077908, XM_021077909, XM_021077910, XM_021077911, XM_021077912, XM_021077913, XM_021077914, XM_021077915, XM_021077916, XM_021077917, XM_021077918, XM_021077919, XM_0210…	17:5596385-5690349:+1	pericentriolar material 1	Cluster0001
PCNP	ENSSSCG00000036491	ENSSSCT00000061429	13:157470048-157491211:-1	PEST proteolytic signal containing nuclear protein	Cluster0001
PCNX1	ENSSSCG00000002330	ENSSSCT00000002593, ENSSSCT00000045706, ENSSSCT00000054657, ENSSSCT00000055338, ENSSSCT00000057905, XM_021099420, XM_021099421, XM_021099422, XM_021099423, XM_021099424, XM_021099425	7:94445384-94617925:+1	pecanex homolog 1 (Drosophila)	Cluster0001
PCNX4	ENSSSCG00000005082	ENSSSCT00000005601, ENSSSCT00000042041, ENSSSCT00000063751	1:189110458-189151734:+1	pecanex 4	Cluster0001
PDCD10	ENSSSCG00000011739	ENSSSCT00000012850, ENSSSCT00000037934, ENSSSCT00000044943, ENSSSCT00000045799, ENSSSCT00000062372, XM_005669964, XM_005669965, XM_005669966, XM_013982176, XM_021068277, XM_021068278, XM_021068280	13:106517359-106559618:-1	programmed cell death 10	Cluster0001
PDIK1L	ENSSSCG00000030660	ENSSSCT00000028111, ENSSSCT00000041960, XM_003356214, XM_005665134, XM_005665135, XM_013999071, XM_021095610	6:83543793-83554307:+1	PDLIM1 interacting kinase 1 like	Cluster0001
PDS5A	ENSSSCG00000023112	ENSSSCT00000029818, ENSSSCT00000045596, ENSSSCT00000046561, ENSSSCT00000047810, ENSSSCT00000048475, ENSSSCT00000060181	8:30988370-31134033:-1	PDS5 cohesin associated factor A	Cluster0001
PDS5B	ENSSSCG00000009345	ENSSSCT00000010242, ENSSSCT00000051730, ENSSSCT00000063159, XM_021065557, XM_021065558, XM_021065559, XM_021065561, XM_021065563, XM_021065564, XM_021065565	11:9014746-9223029:+1	PDS5 cohesin associated factor B	Cluster0001
PGAP1	ENSSSCG00000016073	ENSSSCT00000017500, ENSSSCT00000023196, XM_021075855, XM_021075856, XM_021075857, XM_021075858, XM_021075859	15:100733560-100820553:-1	post-GPI attachment to proteins 1	Cluster0001
PGGT1B	ENSSSCG00000014215	ENSSSCT00000015533, ENSSSCT00000053180, XM_003123848	2:119386053-119440325:-1	protein geranylgeranyltransferase type I subunit beta	Cluster0001
PHAX	ENSSSCG00000014244	ENSSSCT00000015564, ENSSSCT00000041186, XM_005661605	2:129712882-129727090:+1	phosphorylated adaptor for RNA export	Cluster0001
PHC3	ENSSSCG00000030467	ENSSSCT00000027451, ENSSSCT00000029926, ENSSSCT00000038072, ENSSSCT00000040331, ENSSSCT00000050971, ENSSSCT00000057064, ENSSSCT00000063470, XM_021069778, XM_021069779, XM_021069780, XM_021069781, XM_021069782, XM_021069783, XM_021069784, XM_021069785, XM_021069786, XM_021069787, XM_021069789	13:108795364-108913621:-1	polyhomeotic homolog 3	Cluster0001
PHF20	ENSSSCG00000007311	ENSSSCT00000008000, ENSSSCT00000031797, ENSSSCT00000037132, ENSSSCT00000041013, ENSSSCT00000049627, ENSSSCT00000054603, XM_005672899, XM_021078127, XM_021078128, XM_021078129, XM_021078130, XM_021078131	17:39064838-39244923:+1	PHD finger protein 20	Cluster0001
PHF20L1	ENSSSCG00000005950	ENSSSCT00000006533, ENSSSCT00000033933, ENSSSCT00000051386, ENSSSCT00000065912, XM_021088877, XM_021088878, XM_021088879, XM_021088880, XM_021088881, XM_021088882, XM_021088884, XM_021088885, XM_021088887, XM_021088888, XM_021088889, XM_021088890, XM_021088891, XM_021088892	4:8394953-8468265:-1	PHD finger protein 20-like 1	Cluster0001
PHF21A	ENSSSCG00000023974	ENSSSCT00000014488, ENSSSCT00000023373, ENSSSCT00000051529, ENSSSCT00000058477, ENSSSCT00000061805, XM_005660964, XM_013994378, XM_021083121, XM_021083122, XM_021083123, XM_021083124, XM_021083125, XM_021083126, XM_021083127, XM_021083128, XM_021083129, XM_021083132, XM_021083133, XM_021083134, XM_021083135, XM_021083136, XM_021083137, XM_021083138, XM_021083139, XM_021083141	2:16344157-16545272:+1	PHD finger protein 21A	Cluster0001
PHF3	ENSSSCG00000035259	ENSSSCT00000040949, ENSSSCT00000052268, XM_021089288, XM_021089294, XM_021089298, XM_021089302, XM_021089312	1:45219389-45296398:+1	PHD finger protein 3	Cluster0001
PHF8	ENSSSCG00000012329	ENSSSCT00000013482, ENSSSCT00000033605, ENSSSCT00000035915, ENSSSCT00000038669, XM_005673656, XM_013986163, XM_021080703, XM_021080705	X:46648166-46759250:-1	PHD finger protein 8	Cluster0001
PHIP	ENSSSCG00000004473	ENSSSCT00000004941, XM_021092177, XM_021092205, XM_021092207, XM_021092214	1:87117224-87242674:+1	pleckstrin homology domain interacting protein	Cluster0001
PHLPP2	ENSSSCG00000002739	ENSSSCT00000003035, ENSSSCT00000024128, ENSSSCT00000032306, XM_021093823, XM_021093824, XM_021093825	6:14637938-14715966:-1	PH domain and leucine rich repeat protein phosphatase 2	Cluster0001
PHYKPL	ENSSSCG00000014030	ENSSSCT00000015326, ENSSSCT00000041254, ENSSSCT00000043206, ENSSSCT00000043888, ENSSSCT00000052072, ENSSSCT00000055724, XM_021084358, XM_021084359, XM_021084360, XM_021084362	2:80141834-80191957:+1	5-phosphohydroxy-L-lysine phospho-lyase	Cluster0001
PIAS1	ENSSSCG00000004958	ENSSSCT00000005470, ENSSSCT00000026593, XM_003121749	1:165853126-166087239:+1	protein inhibitor of activated STAT 1	Cluster0001
PIAS2	ENSSSCG00000034730	ENSSSCT00000038005, ENSSSCT00000046962, ENSSSCT00000063240, XM_021092622, XM_021092626, XM_021092632, XM_021092641, XM_021092649, XM_021092655, XM_021092679	1:96441666-96545780:-1	protein inhibitor of activated STAT 2	Cluster0001
PIBF1	ENSSSCG00000024722	ENSSSCT00000025113, ENSSSCT00000026633, ENSSSCT00000045708, ENSSSCT00000046867, ENSSSCT00000051035, XM_021065658, XM_021065659, XM_021065660, XM_021065661, XM_021065663, XM_021065664, XM_021065665	11:45076007-45362693:+1	progesterone immunomodulatory binding factor 1	Cluster0001
PICALM	ENSSSCG00000014913	ENSSSCT00000016269, ENSSSCT00000023370, ENSSSCT00000042038, ENSSSCT00000044370, ENSSSCT00000045815, ENSSSCT00000052852, XM_021102067, XM_021102068, XM_021102070, XM_021102071, XM_021102072, XM_021102073, XM_021102074, XM_021102075, XM_021102076, XM_021102077, XM_021102079, XM_021102081, XM_021102082, XM_021102083, XM_021102084, XM_021102085, XM_021102086, XM_021102087, XM_021102088, XM_021102089,…	9:19835303-19947213:-1	phosphatidylinositol binding clathrin assembly protein	Cluster0001
PIK3C2A	ENSSSCG00000025406	ENSSSCT00000024535, XM_021083275	2:41933429-42022209:+1	phosphatidylinositol-4-phosphate 3-kinase catalytic subunit type 2 alpha	Cluster0001
PIK3C3	ENSSSCG00000003749	ENSSSCT00000004151, ENSSSCT00000048045, ENSSSCT00000057896, ENSSSCT00000060093, XM_021093598	6:125890532-126043141:+1	phosphatidylinositol 3-kinase catalytic subunit type 3	Cluster0001
PIK3CA	ENSSSCG00000030413	ENSSSCT00000029004, ENSSSCT00000039550, ENSSSCT00000042181, XM_021069858, XM_021069859	13:117179941-117278498:+1	phosphatidylinositol-4,5-bisphosphate 3-kinase catalytic subunit alpha	Cluster0001
PIK3CB	ENSSSCG00000021203	ENSSSCT00000024030, ENSSSCT00000026312, ENSSSCT00000044249, ENSSSCT00000058043, ENSSSCT00000066091, XM_021069524, XM_021069525, XM_021069526, XM_021069527, XM_021069528, XM_021069529, XM_021069530	13:79425840-79610840:-1	phosphatidylinositol-4,5-bisphosphate 3-kinase catalytic subunit beta	Cluster0001
PIK3R1	ENSSSCG00000016958	ENSSSCT00000018467, ENSSSCT00000030461, ENSSSCT00000033882, ENSSSCT00000035672, ENSSSCT00000036318, ENSSSCT00000042717, ENSSSCT00000058089, ENSSSCT00000063013, XM_005672504	16:46434814-46523623:+1	phosphoinositide-3-kinase regulatory subunit 1	Cluster0001
PIK3R4	ENSSSCG00000029094	ENSSSCT00000025472, ENSSSCT00000051930, ENSSSCT00000057523, ENSSSCT00000061418, ENSSSCT00000063509, ENSSSCT00000064032, XM_021071332, XM_021071333	13:1730949-1815547:+1	phosphoinositide-3-kinase regulatory subunit 4	Cluster0001
PIKFYVE	ENSSSCG00000016147	ENSSSCT00000017580, ENSSSCT00000038596, ENSSSCT00000046313, ENSSSCT00000063694, ENSSSCT00000065767, XM_013984438, XM_013984439, XM_013984440, XM_021076162, XM_021076165, XM_021076166, XM_021076167, XM_021076168	15:111371992-111467899:+1	phosphoinositide kinase, FYVE-type zinc finger containing	Cluster0001
PJA1	ENSSSCG00000024463	ENSSSCT00000032049, ENSSSCT00000049199, XM_003360347, XM_005673702, XM_005673703, XM_005673704, XM_005673705	X:55238193-55280530:-1	praja ring finger ubiquitin ligase 1	Cluster0001
PKN2	ENSSSCG00000006927	ENSSSCT00000007588, ENSSSCT00000045662, ENSSSCT00000063690, XM_013997432, XM_021090332, XM_021090333, XM_021090334, XM_021090335, XM_021090337, XM_021090338	4:127573740-127709942:-1	protein kinase N2	Cluster0001
PLA2G1B	ENSSSCG00000029501	ENSSSCT00000031208	14:40313837-40322365:-1	phospholipase A2 group IB	Cluster0001
PLCB4	ENSSSCG00000007058	ENSSSCT00000007729, ENSSSCT00000037645, ENSSSCT00000041040, ENSSSCT00000049832, ENSSSCT00000056686, ENSSSCT00000062599, ENSSSCT00000066318, XM_013985064, XM_021077452, XM_021077453, XM_021077456, XM_021077458, XM_021077459, XM_021077460, XM_021077461, XM_021077462, XM_021077463, XM_021077464, XM_021077465	17:17916027-18402537:+1	phospholipase C beta 4	Cluster0001
PLCH1	ENSSSCG00000026718	ENSSSCT00000027658, ENSSSCT00000038534, ENSSSCT00000043094, ENSSSCT00000045003, ENSSSCT00000052117, ENSSSCT00000054380, XM_013982145, XM_013982146, XM_013982147, XM_013982148, XM_013982149, XM_013982154, XM_021069697, XM_021069698, XM_021069700, XM_021069701, XM_021069702, XM_021069703	13:95406827-95643193:-1	phospholipase C eta 1	Cluster0001
PLEKHA5	ENSSSCG00000000588	ENSSSCT00000000633, ENSSSCT00000037877, ENSSSCT00000041180, ENSSSCT00000046224, ENSSSCT00000055577, ENSSSCT00000056634, ENSSSCT00000059158, ENSSSCT00000060287, XM_021092259, XM_021092260, XM_021092262, XM_021092263, XM_021092266, XM_021092268, XM_021092269, XM_021092270, XM_021092271, XM_021092272, XM_021092273, XM_021092274, XM_021092275, XM_021092276, XM_021092278, XM_021092280, XM_021092282, X…	5:53760818-54016938:-1	pleckstrin homology domain containing A5	Cluster0001
PLEKHA8	ENSSSCG00000016682	ENSSSCT00000018163, ENSSSCT00000060505, ENSSSCT00000061655, ENSSSCT00000065209, XM_013985757, XM_021079155, XM_021079156	18:42845609-42926059:-1	pleckstrin homology domain containing A8	Cluster0001
PMS1	ENSSSCG00000016045	ENSSSCT00000017470, ENSSSCT00000037039, ENSSSCT00000037786, ENSSSCT00000048592, ENSSSCT00000052772, ENSSSCT00000059289, ENSSSCT00000062488, XM_013984337, XM_021075389, XM_021075390, XM_021075391, XM_021075392, XM_021075393, XM_021075394, XM_021075395, XM_021075396, XM_021075397, XM_021075398, XM_021075399, XM_021075400, XM_021075401	15:94351324-94524555:+1	PMS1 homolog 1, mismatch repair system component	Cluster0001
PMS2	ENSSSCG00000007590	ENSSSCT00000008330, XM_003124283, XM_021086081	3:5118018-5145628:+1	PMS1 homolog 2, mismatch repair system component	Cluster0001
PNISR	ENSSSCG00000037594	ENSSSCT00000028650, ENSSSCT00000048318, ENSSSCT00000060237, XM_021079463, XM_021079851, XM_021080246, XM_021080749, XM_021081189	1:66321459-66381449:-1	PNN interacting serine and arginine rich protein	Cluster0001
PNPLA8	ENSSSCG00000015446	ENSSSCT00000016827, ENSSSCT00000016828, XM_005667750, XM_021063571, XM_021063572, XM_021063574, XM_021063575, XM_021063576	9:108271348-108320579:-1	patatin like phospholipase domain containing 8	Cluster0001
PNPT1	ENSSSCG00000031882	ENSSSCT00000055752, XM_021085800	3:85595305-85639660:+1	polyribonucleotide nucleotidyltransferase 1	Cluster0001
POGLUT1	ENSSSCG00000032313	ENSSSCT00000013019, ENSSSCT00000040662, ENSSSCT00000041017, ENSSSCT00000047109, XM_021070325, XM_021070326, XM_021070327, XM_021070328	13:140764216-140793651:-1	protein O-glucosyltransferase 1	Cluster0001
POLI	ENSSSCG00000004529	ENSSSCT00000005003, ENSSSCT00000036768, ENSSSCT00000055241, XM_021093313, XM_021093315, XM_021093318, XM_021093321, XM_021093324, XM_021093327	1:103794071-103824644:+1	DNA polymerase iota	Cluster0001
POLK	ENSSSCG00000014082	ENSSSCT00000015383, ENSSSCT00000045937, ENSSSCT00000047573, ENSSSCT00000049282, XM_021084453	2:84531102-84690674:+1	DNA polymerase kappa	Cluster0001
POLR3B	ENSSSCG00000000169	ENSSSCT00000000177, ENSSSCT00000000178, ENSSSCT00000028672, ENSSSCT00000052954, XM_021091574, XM_021091576	5:13590158-13926729:-1	RNA polymerase III subunit B	Cluster0001
POLR3F	ENSSSCG00000007095	ENSSSCT00000007767, ENSSSCT00000050283, XM_003483898, XM_003483899	17:26719514-26737643:+1	RNA polymerase III subunit F	Cluster0001
POU2F1	ENSSSCG00000006310	ENSSSCT00000006917, ENSSSCT00000041850, ENSSSCT00000045260, ENSSSCT00000053018, ENSSSCT00000062507, XM_005663132, XM_005663133, XM_005663134, XM_005663135, XM_013996798	4:83596194-83777283:-1	POU class 2 homeobox 1	Cluster0001
PPHLN1	ENSSSCG00000000793	ENSSSCT00000000859, ENSSSCT00000056187, ENSSSCT00000056241, ENSSSCT00000063623, ENSSSCT00000064602, ENSSSCT00000065723, XM_013997947, XM_013997950, XM_021092548, XM_021092549, XM_021092550, XM_021092551, XM_021092552, XM_021092554, XM_021092555	5:73555798-73697374:+1	periphilin 1	Cluster0001
PPIL4	ENSSSCG00000028867	ENSSSCT00000024741	1:16400963-16446849:+1	peptidylprolyl isomerase like 4	Cluster0001
PPIP5K2	ENSSSCG00000024999	ENSSSCT00000023670, ENSSSCT00000031964, ENSSSCT00000047228, ENSSSCT00000048119, ENSSSCT00000052307, ENSSSCT00000052528, ENSSSCT00000055761, ENSSSCT00000057798, ENSSSCT00000060027, ENSSSCT00000064119, XM_013987579, XM_013987581, XM_021084570, XM_021084571, XM_021084572, XM_021084574, XM_021084575, XM_021084577, XM_021084578, XM_021084579, XM_021084580, XM_021084581, XM_021084582, XM_021084583, XM_…	2:108585999-108692404:+1	diphosphoinositol pentakisphosphate kinase 2	Cluster0001
PPP1R12A	ENSSSCG00000038973	ENSSSCT00000050420, ENSSSCT00000057360, XM_021092811	5:101490207-101608398:+1	protein phosphatase 1 regulatory subunit 12A	Cluster0001
PPP1R21	ENSSSCG00000008423	ENSSSCT00000009224, ENSSSCT00000056003, ENSSSCT00000056264, XM_003125155, XM_005655227	3:92100282-92228138:-1	protein phosphatase 1 regulatory subunit 21	Cluster0001
PPP2CA	ENSSSCG00000014298	ENSSSCT00000015621, ENSSSCT00000041775	2:136494395-136522681:-1	protein phosphatase 2 catalytic subunit alpha	Cluster0001
PPP2R5E	ENSSSCG00000026382	ENSSSCT00000032151, ENSSSCT00000057247	1:194504962-194657743:+1	protein phosphatase 2 regulatory subunit B epsilon	Cluster0001
PPP4R2	ENSSSCG00000037216	ENSSSCT00000055097, ENSSSCT00000056573, ENSSSCT00000057625	13:54324978-54378276:+1	protein phosphatase 4 regulatory subunit 2	Cluster0001
PPP4R3A	ENSSSCG00000002441	ENSSSCT00000002711, ENSSSCT00000056021, XM_005666398, XM_005666399, XM_021099618, XM_021099619	7:113111303-113148986:-1	protein phosphatase 4 regulatory subunit 3A	Cluster0001
PPP4R3B	ENSSSCG00000008398	ENSSSCT00000009195, ENSSSCT00000045674, ENSSSCT00000050802, ENSSSCT00000060710	3:85649855-85711107:+1	protein phosphatase 4 regulatory subunit 3B	Cluster0001
PPP6R3	ENSSSCG00000012884	ENSSSCT00000014085, ENSSSCT00000040805, ENSSSCT00000050172, ENSSSCT00000052161, ENSSSCT00000055428, ENSSSCT00000061252, ENSSSCT00000063131, ENSSSCT00000063174, XM_021082693, XM_021082694, XM_021082695, XM_021082696, XM_021082697, XM_021082698, XM_021082699, XM_021082700, XM_021082701, XM_021082702, XM_021082703, XM_021082704, XM_021082705, XM_021082706, XM_021082707, XM_021082708, XM_021082709, X…	2:4394676-4523830:-1	protein phosphatase 6 regulatory subunit 3	Cluster0001
PPWD1	ENSSSCG00000016945	ENSSSCT00000018453, XM_005672480, XM_013984813, XM_021076546, XM_021076547	16:44080627-44101428:+1	peptidylprolyl isomerase domain and WD repeat containing 1	Cluster0001
PRDM10	ENSSSCG00000015243	ENSSSCT00000016612, ENSSSCT00000037612, XM_013979567	9:56657272-56749476:-1	PR/SET domain 10	Cluster0001
PRKAA1	ENSSSCG00000024598	ENSSSCT00000030818, ENSSSCT00000065700, XM_021076521, XM_021076522	16:25743603-25783610:-1	protein kinase AMP-activated catalytic subunit alpha 1	Cluster0001
PRKCI	ENSSSCG00000011745	ENSSSCT00000012856, ENSSSCT00000045511, ENSSSCT00000052077	13:108912758-108997931:+1	protein kinase C iota	Cluster0001
PRKD3	ENSSSCG00000008495	ENSSSCT00000009297, ENSSSCT00000041926, ENSSSCT00000046610, ENSSSCT00000050408, ENSSSCT00000056079, ENSSSCT00000056226, XM_003125235, XM_013996209, XM_013996210, XM_013996211, XM_021087628, XM_021087629	3:102842183-102948978:+1	protein kinase D3	Cluster0001
PRKDC	ENSSSCG00000006274	ENSSSCT00000006873, ENSSSCT00000038758, ENSSSCT00000039555, ENSSSCT00000057372, XM_021089419, XM_021089420, XM_021089421, XM_021089422	4:79686651-79845655:+1	protein kinase, DNA-activated, catalytic polypeptide	Cluster0001
PRKRA	ENSSSCG00000038254	ENSSSCT00000065566, XM_001927705	15:84130236-84156382:-1	protein activator of interferon induced protein kinase EIF2AK2	Cluster0001
PRMT3	ENSSSCG00000013347	ENSSSCT00000014576, ENSSSCT00000029445	2:38888028-39032739:-1	protein arginine methyltransferase 3	Cluster0001
PRMT9	ENSSSCG00000009030	ENSSSCT00000009889, ENSSSCT00000053728, ENSSSCT00000055721, ENSSSCT00000058857, XM_021101522, XM_021101524, XM_021101525, XM_021101526	8:81072565-81115966:+1	protein arginine methyltransferase 9	Cluster0001
PROKR2	ENSSSCG00000037063	ENSSSCT00000049900, ENSSSCT00000053231, XM_003359888	17:14242504-14257379:-1	prokineticin receptor 2	Cluster0001
PRPF39	ENSSSCG00000004997	ENSSSCT00000005511, ENSSSCT00000049494, ENSSSCT00000052409, ENSSSCT00000057685, ENSSSCT00000062711, ENSSSCT00000065682, XM_001927120, XM_005659929, XM_005659930, XM_021101255, XM_021101264	1:175285243-175317242:+1	pre-mRNA processing factor 39	Cluster0001
PRPF40A	ENSSSCG00000015867	ENSSSCT00000017278, ENSSSCT00000037304, ENSSSCT00000038990, ENSSSCT00000049118, ENSSSCT00000049460, ENSSSCT00000055453, ENSSSCT00000064185, ENSSSCT00000066344, XM_005671845, XM_013984127, XM_013984128, XM_013984129, XM_013984130, XM_013984132, XM_021074550, XM_021074551, XM_021074552, XM_021074553, XM_021074554	15:60386596-60440529:-1	pre-mRNA processing factor 40 homolog A	Cluster0001
PRR14L	ENSSSCG00000010033	ENSSSCT00000010990, ENSSSCT00000037841, ENSSSCT00000045627, ENSSSCT00000051499, ENSSSCT00000053318, ENSSSCT00000058673, ENSSSCT00000060188, XM_005670868, XM_005670869, XM_013983088, XM_021073914, XM_021073915	14:48351979-48418167:-1	proline rich 14 like	Cluster0001
PRRC2C	ENSSSCG00000015480	ENSSSCT00000016863, ENSSSCT00000054927, ENSSSCT00000060211, ENSSSCT00000065140, ENSSSCT00000066046, XM_003130303, XM_005653732, XM_005653733, XM_005653735, XM_005653736, XM_005653737, XM_005653738, XM_005653739, XM_005653740, XM_005653741, XM_005653742, XM_013977753, XM_013977760, XM_021063628, XM_021063629, XM_021063630, XM_021063631, XM_021063632, XM_021063633, XM_021063634	9:113973268-114067553:+1	proline rich coiled-coil 2C	Cluster0001
PSMC6	ENSSSCG00000005038	ENSSSCT00000005554, ENSSSCT00000053879, ENSSSCT00000056381, XM_001928747	1:182318731-182357981:+1	proteasome 26S subunit, ATPase 6	Cluster0001
PTAR1	ENSSSCG00000005252	ENSSSCT00000005787, ENSSSCT00000042045	1:223032881-223089666:-1	protein prenyltransferase alpha subunit repeat containing 1	Cluster0001
PTEN	.	XM_021071996	.	phosphatase and tensin homolog	Cluster0001
PTPN20	ENSSSCG00000010377	ENSSSCT00000011359, ENSSSCT00000066207, XM_021073067	14:88766367-88804203:-1	protein tyrosine phosphatase, non-receptor type 20	Cluster0001
PTPRK	ENSSSCG00000004209	ENSSSCT00000004650, ENSSSCT00000038730, ENSSSCT00000038851, ENSSSCT00000054145, ENSSSCT00000060259, ENSSSCT00000062128, ENSSSCT00000063294, ENSSSCT00000063865, XM_001926628, XM_003353215, XM_005652678, XM_013988357, XM_013988360, XM_013988362, XM_013988367, XM_013988375, XM_013988384, XM_013988397, XM_021072702, XM_021072706, XM_021072711, XM_021072717, XM_021072723, XM_021072728, XM_021072735	1:34692715-35258701:+1	protein tyrosine phosphatase, receptor type K	Cluster0001
PUM1	ENSSSCG00000003591	ENSSSCT00000003986, ENSSSCT00000025839, ENSSSCT00000043104, ENSSSCT00000048874, ENSSSCT00000049915, ENSSSCT00000057746, ENSSSCT00000064370, XM_013999086, XM_021095734, XM_021095735, XM_021095736, XM_021095737, XM_021095738, XM_021095739, XM_021095740, XM_021095741, XM_021095742, XM_021095743, XM_021095744, XM_021095745, XM_021095746, XM_021095747, XM_021095749, XM_021095750, XM_021095751, XM_0210…	6:87547320-87687460:-1	pumilio RNA binding family member 1	Cluster0001
PUM2	ENSSSCG00000008600	ENSSSCT00000009411, ENSSSCT00000037311, ENSSSCT00000037408, ENSSSCT00000043465, ENSSSCT00000045037, ENSSSCT00000045867, ENSSSCT00000050255, ENSSSCT00000050337, XM_003125374, XM_003481283, XM_005662719, XM_005662720, XM_013996319, XM_013996320, XM_013996322, XM_013996323, XM_013996324, XM_021087792, XM_021087793, XM_021087794, XM_021087795, XM_021087796, XM_021087797, XM_021087798, XM_021087800, X…	3:117857960-117965567:+1	pumilio RNA binding family member 2	Cluster0001
PUS10	ENSSSCG00000008385	ENSSSCT00000009182, ENSSSCT00000048867, ENSSSCT00000057933, XM_021087518	3:80791459-80861714:+1	pseudouridylate synthase 10	Cluster0001
PUS7	ENSSSCG00000015428	ENSSSCT00000016808, ENSSSCT00000028990, ENSSSCT00000041093, ENSSSCT00000045267, ENSSSCT00000052189, XM_021102593, XM_021102594	9:105325722-105445621:-1	pseudouridylate synthase 7 (putative)	Cluster0001
PUS7L	ENSSSCG00000000800	ENSSSCT00000000867, ENSSSCT00000040277, ENSSSCT00000061131, ENSSSCT00000065568, XM_001924907, XM_013997955, XM_013997956, XM_013997957, XM_021092565, XM_021092566	5:74803484-74835140:-1	pseudouridylate synthase 7 like	Cluster0001
PWWP3B	ENSSSCG00000012548	ENSSSCT00000013720, ENSSSCT00000034012	X:86788430-86814622:+1	PWWP domain containing 3B	Cluster0001
PXMP4	ENSSSCG00000034625	ENSSSCT00000053969, ENSSSCT00000059657, XM_021077364	17:37199884-37218165:-1	peroxisomal membrane protein 4	Cluster0001
PYROXD1	ENSSSCG00000000583	ENSSSCT00000000627, XM_021092253, XM_021092254	5:51993954-52021439:-1	pyridine nucleotide-disulphide oxidoreductase domain 1	Cluster0001
QSER1	ENSSSCG00000013314	ENSSSCT00000014540, ENSSSCT00000025799, ENSSSCT00000038039, ENSSSCT00000038902, ENSSSCT00000061207, XM_013994460, XM_021083211, XM_021083212, XM_021083213, XM_021083215	2:27955398-28043478:-1	glutamine and serine rich 1	Cluster0001
R3HCC1L	ENSSSCG00000010531	ENSSSCT00000011521, ENSSSCT00000042068, ENSSSCT00000043687, ENSSSCT00000054712, ENSSSCT00000055184, XM_001929141, XM_005671376, XM_021074445, XM_021074446	14:109484152-109569340:+1	R3H domain and coiled-coil containing 1 like	Cluster0001
RAB11FIP2	ENSSSCG00000010672	ENSSSCT00000011673, ENSSSCT00000048560, XM_001927901	14:128068015-128111134:-1	RAB11 family interacting protein 2	Cluster0001
RAB18	ENSSSCG00000028655	ENSSSCT00000024844, XM_003357752, XM_021064710	10:38970428-39004972:+1	RAB18, member RAS oncogene family	Cluster0001
RAB21	ENSSSCG00000032468	ENSSSCT00000056108, XM_003481659	5:35757278-35790377:+1	RAB21, member RAS oncogene family	Cluster0001
RAB33B	ENSSSCG00000020711	ENSSSCT00000023933, XM_003357021	8:87545116-87570545:-1	RAB33B, member RAS oncogene family	Cluster0001
RAB3GAP1	ENSSSCG00000015695	ENSSSCT00000017095, XM_013983945	15:16764048-16814764:-1	RAB3 GTPase activating protein catalytic subunit 1	Cluster0001
RAB5A	ENSSSCG00000037653	ENSSSCT00000045035, XM_021068191, XM_021068192	13:6905178-6941791:+1	RAB5A, member RAS oncogene family	Cluster0001
RAB8B	ENSSSCG00000026571	ENSSSCT00000026677, ENSSSCT00000052686, ENSSSCT00000056693, ENSSSCT00000061279, XM_001929029	1:108764304-108840218:-1	RAB8B, member RAS oncogene family	Cluster0001
RABGAP1	ENSSSCG00000020743	ENSSSCT00000023452, ENSSSCT00000024937, ENSSSCT00000025490, ENSSSCT00000064053, XM_021074563, XM_021074567, XM_021074570, XM_021074574, XM_021074580, XM_021074586, XM_021074593, XM_021074599	1:263847015-264030582:+1	RAB GTPase activating protein 1	Cluster0001
RABGAP1L	.	XM_003130320, XM_013989628, XM_021102607, XM_021102608, XM_021102609, XM_021102610, XM_021102611, XM_021102612, XM_021102613	.	RAB GTPase activating protein 1 like	Cluster0001
RAD17	ENSSSCG00000016960	ENSSSCT00000018469, ENSSSCT00000023550, ENSSSCT00000030759, ENSSSCT00000039928, XM_021076887, XM_021076888	16:47499531-47533692:+1	RAD17 checkpoint clamp loader component	Cluster0001
RAD51B	ENSSSCG00000028877	ENSSSCT00000023246, XM_005656349, XM_021099931, XM_021099932, XM_021099933, XM_021099934, XM_021099935, XM_021099936, XM_021099937, XM_021099938, XM_021099939, XM_021099940, XM_021099941	7:91592445-92177108:+1	RAD51 paralog B	Cluster0001
RAD51C	ENSSSCG00000023955	ENSSSCT00000023145, XM_003131660, XM_005668974, XM_013981102, XM_021067279, XM_021067280, XM_021067281	12:34975979-35019019:+1	RAD51 paralog C	Cluster0001
RAD52	ENSSSCG00000000754	ENSSSCT00000000818, ENSSSCT00000040429, ENSSSCT00000042724, ENSSSCT00000046239, ENSSSCT00000046779, ENSSSCT00000050037, ENSSSCT00000051733, ENSSSCT00000052070, XM_005664104, XM_005664105, XM_005664106, XM_005664107, XM_013997861, XM_013997863, XM_013997864, XM_013997865, XM_013997868, XM_013997869, XM_021090880, XM_021090881, XM_021090882, XM_021090885, XM_021090886	5:68133699-68223645:-1	RAD52 homolog, DNA repair protein	Cluster0001
RADX	ENSSSCG00000012549	ENSSSCT00000013721, ENSSSCT00000060670	X:87025077-87106878:+1	RPA1 related single stranded DNA binding protein, X-linked	Cluster0001
RALGAPA1	ENSSSCG00000032377	ENSSSCT00000024175, ENSSSCT00000053217, ENSSSCT00000062114, ENSSSCT00000064523, ENSSSCT00000065480, XM_021099149, XM_021099150, XM_021099151, XM_021099152, XM_021099153, XM_021099154, XM_021099155, XM_021099156, XM_021099157, XM_021099158, XM_021099159, XM_021099160, XM_021099161, XM_021099163, XM_021099164, XM_021099165	7:64140697-64375535:+1	Ral GTPase activating protein catalytic alpha subunit 1	Cluster0001
RALGAPB	ENSSSCG00000007345	ENSSSCT00000008037, ENSSSCT00000008039, ENSSSCT00000026825, XM_021078132, XM_021078133, XM_021078135, XM_021078137, XM_021078138, XM_021078139	17:41507756-41606905:+1	Ral GTPase activating protein non-catalytic beta subunit	Cluster0001
RALGPS2	ENSSSCG00000015523	ENSSSCT00000016910, ENSSSCT00000038783, XM_021063728, XM_021063729, XM_021063730	9:120562409-120724218:+1	Ral GEF with PH domain and SH3 binding motif 2	Cluster0001
RANBP17	ENSSSCG00000017000	ENSSSCT00000018512, ENSSSCT00000043212, ENSSSCT00000047646, ENSSSCT00000050855, ENSSSCT00000061529, XM_021076680, XM_021076681, XM_021076682	16:52833313-53160177:-1	RAN binding protein 17	Cluster0001
RAPGEF2	ENSSSCG00000008881	ENSSSCT00000009724, ENSSSCT00000043305, ENSSSCT00000048354, ENSSSCT00000057939, ENSSSCT00000061660, ENSSSCT00000062205, ENSSSCT00000062306, XM_013978701, XM_021101305	8:48020695-48277458:+1	Rap guanine nucleotide exchange factor 2	Cluster0001
RAPGEF6	.	XM_005661629, XM_021085403, XM_021085404, XM_021085405, XM_021085407, XM_021085408, XM_021085409, XM_021085410, XM_021085411, XM_021085412, XM_021085413	.	Rap guanine nucleotide exchange factor 6	Cluster0001
RASA1	ENSSSCG00000014146	ENSSSCT00000015450, ENSSSCT00000056952, XM_003354207, XM_005661545, XM_021084515	2:94879210-94994624:+1	RAS p21 protein activator 1	Cluster0001
RASA2	ENSSSCG00000011672	ENSSSCT00000012777, ENSSSCT00000053735, XM_021069542, XM_021069543, XM_021069544, XM_021069545	13:82230118-82352756:+1	RAS p21 protein activator 2	Cluster0001
RASAL2	ENSSSCG00000015519	ENSSSCT00000016906, ENSSSCT00000032575, ENSSSCT00000037395, ENSSSCT00000047395, ENSSSCT00000047555, ENSSSCT00000050116, ENSSSCT00000057410, XM_005667785, XM_005667786, XM_013979892, XM_013979893, XM_013979894, XM_021063711, XM_021063712, XM_021063713, XM_021063714, XM_021063715, XM_021063716, XM_021063717, XM_021063719, XM_021063720, XM_021063721, XM_021063722	9:120131617-120325107:+1	RAS protein activator like 2	Cluster0001
RAVER2	ENSSSCG00000025672	ENSSSCT00000022489, ENSSSCT00000042459, ENSSSCT00000050562, XM_021096539	6:147567182-147722429:-1	ribonucleoprotein, PTB binding 2	Cluster0001
RB1	ENSSSCG00000009401	ENSSSCT00000010300, ENSSSCT00000039213, XM_013992198	11:19186760-19317688:-1	RB transcriptional corepressor 1	Cluster0001
RBAK	ENSSSCG00000008668	ENSSSCT00000009485, XM_005653058, XM_021086052	3:4422475-4439939:-1	RB associated KRAB zinc finger	Cluster0001
RBBP5	ENSSSCG00000015288	ENSSSCT00000016659, XM_003482655, XM_003482656, XM_013979609	9:65780923-65821532:-1	RB binding protein 5, histone lysine methyltransferase complex subunit	Cluster0001
RBM12	ENSSSCG00000036156	ENSSSCT00000028045, XM_003483946, XM_005672896, XM_013985324, XM_013985325, XM_021078266	17:38982708-38997242:-1	RNA binding motif protein 12	Cluster0001
RBM12B	ENSSSCG00000006110	ENSSSCT00000006702, ENSSSCT00000051303, ENSSSCT00000059771, ENSSSCT00000061181, XM_003125566, XM_005662972, XM_013996610, XM_013996611, XM_021089110, XM_021089111, XM_021089112	4:42946778-42963993:+1	RNA binding motif protein 12B	Cluster0001
RBM15	ENSSSCG00000006809	ENSSSCT00000007457, ENSSSCT00000007458, ENSSSCT00000060223, ENSSSCT00000061298, ENSSSCT00000065773, XM_005663577	4:109744852-109786235:-1	RNA binding motif protein 15	Cluster0001
RBM26	ENSSSCG00000009479	ENSSSCT00000010394, ENSSSCT00000028357, ENSSSCT00000050901, ENSSSCT00000061236, ENSSSCT00000064925, XM_001925971, XM_005668487, XM_013980595, XM_013980596, XM_013980597, XM_013980598, XM_013980599, XM_013980600, XM_013980606, XM_013980607, XM_013980609, XM_013980610, XM_013980611, XM_013980612, XM_021065770, XM_021065771, XM_021065772, XM_021065773, XM_021065774, XM_021065775, XM_021065776, XM_02…	11:51340630-51420865:-1	RNA binding motif protein 26	Cluster0001
RBM39	ENSSSCG00000007309	ENSSSCT00000007997, ENSSSCT00000048381, ENSSSCT00000055064, ENSSSCT00000055143, ENSSSCT00000060269, ENSSSCT00000061882, XM_003359964, XM_003359965, XM_005672897, XM_005672898, XM_013985327, XM_021078267, XM_021078268, XM_021078269, XM_021078270, XM_021078271, XM_021078272, XM_021078273, XM_021078274, XM_021078275, XM_021078276, XM_021078278, XM_021078279, XM_021078280, XM_021078281, XM_021078282,…	17:39029018-39064908:-1	RNA binding motif protein 39	Cluster0001
RBM41	ENSSSCG00000012556	ENSSSCT00000013728, ENSSSCT00000036760, ENSSSCT00000046582, XM_003135295, XM_013983724	X:87512550-87575086:-1	RNA binding motif protein 41	Cluster0001
RBM45	ENSSSCG00000015996	ENSSSCT00000017417, ENSSSCT00000053566, ENSSSCT00000055879, XM_013990595, XM_013990596, XM_021074963, XM_021074964, XM_021074965	15:83792723-83819027:+1	RNA binding motif protein 45	Cluster0001
RBM48	ENSSSCG00000015315	ENSSSCT00000016688, XM_003130141	9:72444810-72454069:+1	RNA binding motif protein 48	Cluster0001
RBM5	ENSSSCG00000011395	ENSSSCT00000012473, ENSSSCT00000057016, XM_005669588	13:32579775-32612713:+1	RNA binding motif protein 5	Cluster0001
RBM6	ENSSSCG00000011394	ENSSSCT00000012472, ENSSSCT00000036734, ENSSSCT00000057165, XM_003483187, XM_005669583, XM_013981726, XM_013981727, XM_013981728, XM_021068796, XM_021068797, XM_021068798, XM_021068799, XM_021068800	13:32445015-32589407:+1	RNA binding motif protein 6	Cluster0001
RBM7	.	XM_003129877	.	RNA binding motif protein 7	Cluster0001
RBMX2	ENSSSCG00000032739	ENSSSCT00000023251, ENSSSCT00000059332, ENSSSCT00000063495	X:106880833-106891969:+1	RNA binding motif protein X-linked 2	Cluster0001
RBMXL1	ENSSSCG00000012703	ENSSSCT00000013889, ENSSSCT00000034598, ENSSSCT00000035101, ENSSSCT00000035747	X:111962632-111974472:-1	RNA binding motif protein X-linked	Cluster0001
RBPJ	ENSSSCG00000022155	ENSSSCT00000023054, ENSSSCT00000038081, ENSSSCT00000038237, ENSSSCT00000044877, ENSSSCT00000056023, ENSSSCT00000060917, XM_003356883, XM_003356884, XM_005666567	8:19932466-20166754:+1	recombination signal binding protein for immunoglobulin kappa J region	Cluster0001
RC3H1	ENSSSCG00000015498	ENSSSCT00000016884, ENSSSCT00000041796, ENSSSCT00000054568, XM_003357546, XM_013989616	9:116208794-116293915:-1	ring finger and CCCH-type domains 1	Cluster0001
RC3H2	ENSSSCG00000005575	ENSSSCT00000006128, ENSSSCT00000060389, XM_013993836, XM_013993837, XM_021068506	1:263772173-263821948:-1	ring finger and CCCH-type domains 2	Cluster0001
RCOR3	ENSSSCG00000028293	ENSSSCT00000026117, ENSSSCT00000040028, ENSSSCT00000047312, ENSSSCT00000050585, ENSSSCT00000061679, XM_021063868, XM_021063869, XM_021063870, XM_021063872, XM_021063873, XM_021063874, XM_021063875	9:131833346-131890819:-1	REST corepressor 3	Cluster0001
RD3	ENSSSCG00000035369	ENSSSCT00000063257, XM_021063864	9:131704683-131720294:+1	retinal degeneration 3	Cluster0001
RD3L	ENSSSCG00000033990	ENSSSCT00000054448, ENSSSCT00000061873, XM_005653540	AEMK02000452.1:2401612-2404836:-1	retinal degeneration 3-like	Cluster0001
RECQL	ENSSSCG00000000580	ENSSSCT00000000624, ENSSSCT00000036882, ENSSSCT00000059872, XM_021091092	5:51953184-51997113:+1	RecQ like helicase	Cluster0001
REL	ENSSSCG00000008388	ENSSSCT00000009185, ENSSSCT00000054060, XM_013996137	3:80872286-80911959:-1	REL proto-oncogene, NF-kB subunit	Cluster0001
RELCH	ENSSSCG00000004899	ENSSSCT00000005405, ENSSSCT00000047247, ENSSSCT00000055242, ENSSSCT00000055331, ENSSSCT00000062212, ENSSSCT00000063628	1:159207616-159317675:-1	RAB11 binding and LisH domain, coiled-coil and HEAT repeat containing	Cluster0001
REST	ENSSSCG00000023357	ENSSSCT00000009736, ENSSSCT00000030837, ENSSSCT00000057786, ENSSSCT00000058507, ENSSSCT00000064442, XM_003129021	8:56035202-56215010:+1	RE1 silencing transcription factor	Cluster0001
REV3L	ENSSSCG00000025703	ENSSSCT00000004881, ENSSSCT00000026193, ENSSSCT00000042003, ENSSSCT00000046763, ENSSSCT00000061586, XM_021091238, XM_021091250	1:77195253-77401051:-1	REV3 like, DNA directed polymerase zeta catalytic subunit	Cluster0001
RFC1	ENSSSCG00000008788	ENSSSCT00000009614, ENSSSCT00000040698, ENSSSCT00000061707, ENSSSCT00000063047, XM_005666588, XM_005666589, XM_013978598, XM_021101113	8:30552948-30635896:-1	replication factor C subunit 1	Cluster0001
RFWD2	.	XM_021063674, XM_021063675, XM_021063677, XM_021063678, XM_021063679, XM_021063680	.	ring finger and WD repeat domain 2	Cluster0001
RFX7	ENSSSCG00000004603	ENSSSCT00000005084, ENSSSCT00000040161, ENSSSCT00000056523, XM_021094829, XM_021094830, XM_021094836, XM_021094860	1:115734358-115871092:+1	regulatory factor X7	Cluster0001
RHOBTB3	ENSSSCG00000029805	ENSSSCT00000024526, ENSSSCT00000028564, ENSSSCT00000063199, XM_003354222, XM_021084548	2:102334820-102491856:+1	Rho related BTB domain containing 3	Cluster0001
RHOT1	ENSSSCG00000017735	ENSSSCT00000019302, ENSSSCT00000036939, ENSSSCT00000045634, ENSSSCT00000052850, ENSSSCT00000056201, XM_003131742, XM_005656986, XM_013989959	12:42711234-42783421:-1	ras homolog family member T1	Cluster0001
RIC8B	ENSSSCG00000000167	ENSSSCT00000000176, ENSSSCT00000047620, ENSSSCT00000053958, ENSSSCT00000055709, ENSSSCT00000060459, XM_005655526	5:13468944-13585781:-1	RIC8 guanine nucleotide exchange factor B	Cluster0001
RICTOR	ENSSSCG00000016853	ENSSSCT00000018353, ENSSSCT00000040125, ENSSSCT00000056502, ENSSSCT00000064221, ENSSSCT00000064773, ENSSSCT00000066384, XM_003359762, XM_021076927, XM_021076928	16:24109947-24311162:-1	RPTOR independent companion of MTOR complex 2	Cluster0001
RIF1	ENSSSCG00000016395	ENSSSCT00000017851, ENSSSCT00000055870, XM_003359717, XM_013990617, XM_021076097	15:774191-832010:-1	replication timing regulatory factor 1	Cluster0001
RIOK2	.	XM_021085153	.	RIO kinase 2	Cluster0001
RIPK2	ENSSSCG00000024096	ENSSSCT00000024891, ENSSSCT00000026840, ENSSSCT00000034284, XM_021089139	4:47026055-47075138:-1	receptor interacting serine/threonine kinase 2	Cluster0001
RLF	ENSSSCG00000003670	ENSSSCT00000004066, ENSSSCT00000045163, ENSSSCT00000046706, XM_021096011	6:95900086-95994043:+1	rearranged L-myc fusion	Cluster0001
RLIM	ENSSSCG00000028538	ENSSSCT00000013579, ENSSSCT00000030994, ENSSSCT00000060205, ENSSSCT00000065811, XM_003135188, XM_003360370, XM_021080456	X:59890207-59920493:-1	ring finger protein, LIM domain interacting	Cluster0001
RNF111	ENSSSCG00000004589	ENSSSCT00000005070, ENSSSCT00000038790, ENSSSCT00000042854, ENSSSCT00000047283, XM_013992922, XM_013992923, XM_013992924, XM_013992925, XM_013992927, XM_021073547, XM_021073569, XM_021073571	1:112961417-113059713:-1	ring finger protein 111	Cluster0001
RNF115	ENSSSCG00000037355	ENSSSCT00000053819	4:99493465-99577921:+1	ring finger protein 115	Cluster0001
RNF169	ENSSSCG00000021822	ENSSSCT00000032202	9:9069816-9173899:+1	ring finger protein 169	Cluster0001
RNF19A	ENSSSCG00000006066	ENSSSCT00000006656, ENSSSCT00000041893, ENSSSCT00000042277, ENSSSCT00000047504, XM_013996573	4:36654208-36726969:+1	ring finger protein 19A, RBR E3 ubiquitin protein ligase	Cluster0001
RNF219	ENSSSCG00000029113	ENSSSCT00000031188, ENSSSCT00000045220, ENSSSCT00000051817, ENSSSCT00000059820, ENSSSCT00000065608, XM_003131038, XM_021065768, XM_021065769	11:50741629-50786853:-1	ring finger protein 219	Cluster0001
RNF24	ENSSSCG00000035181	ENSSSCT00000037004, XM_021078064	17:31765269-31794881:+1	ring finger protein 24	Cluster0001
RNF7	ENSSSCG00000029774	ENSSSCT00000027810, ENSSSCT00000060469, XM_005669903	13:82548570-82557995:+1	ring finger protein 7	Cluster0001
RNGTT	ENSSSCG00000004311	ENSSSCT00000004766, ENSSSCT00000053939, ENSSSCT00000058496	1:56852866-57062070:-1	RNA guanylyltransferase and 5 -phosphatase	Cluster0001
RNMT	ENSSSCG00000025855	ENSSSCT00000027735, XM_021096015	6:96342914-96360169:-1	RNA guanine-7 methyltransferase	Cluster0001
RNPC3	ENSSSCG00000037254	ENSSSCT00000026127, ENSSSCT00000031651, ENSSSCT00000031693, ENSSSCT00000057343, XM_005663629, XM_005663631, XM_013997339	4:115243183-115311972:-1	RNA binding region (RNP1, RRM) containing 3	Cluster0001
RO60	ENSSSCG00000032055	ENSSSCT00000052320, ENSSSCT00000063834	10:694350-725346:-1	Ro60, Y RNA binding protein	Cluster0001
ROCK1	ENSSSCG00000021893	ENSSSCT00000026467, ENSSSCT00000029907, ENSSSCT00000046687, ENSSSCT00000057778	6:106163698-106314952:-1	Rho associated coiled-coil containing protein kinase 1	Cluster0001
RP2	ENSSSCG00000027701	ENSSSCT00000024745, ENSSSCT00000038063	X:41488003-41534806:+1	RP2, ARL3 GTPase activating protein	Cluster0001
RPAP2	ENSSSCG00000006903	ENSSSCT00000007559, ENSSSCT00000038115, ENSSSCT00000042637, ENSSSCT00000043396, ENSSSCT00000046391	4:124691657-124773890:-1	RNA polymerase II associated protein 2	Cluster0001
RPP30	ENSSSCG00000010460	ENSSSCT00000011446, XM_001924771	14:102565990-102598694:+1	ribonuclease P/MRP subunit p30	Cluster0001
RPRD2	ENSSSCG00000030291	ENSSSCT00000022559, ENSSSCT00000049663, ENSSSCT00000062584, ENSSSCT00000064242, XM_013988087, XM_013988089, XM_021089901, XM_021089902, XM_021089903	4:98639851-98734297:-1	regulation of nuclear pre-mRNA domain containing 2	Cluster0001
RPS6KA5	ENSSSCG00000024377	ENSSSCT00000002707, ENSSSCT00000026351, ENSSSCT00000043476, ENSSSCT00000046328, XM_021099610, XM_021099612, XM_021099613, XM_021099614, XM_021099616, XM_021099617	7:112561988-112753617:-1	ribosomal protein S6 kinase A5	Cluster0001
RPS6KA6	ENSSSCG00000012456	ENSSSCT00000013622, ENSSSCT00000032934, XM_013990943, XM_013990944, XM_013990945, XM_021079908	X:67239639-67414713:-1	ribosomal protein S6 kinase A6	Cluster0001
RPS6KB1	.	XM_003131671, XM_021067293, XM_021067294	.	ribosomal protein S6 kinase B1	Cluster0001
RPS6KC1	ENSSSCG00000015586	ENSSSCT00000016979, ENSSSCT00000016980, ENSSSCT00000036947, ENSSSCT00000050185, ENSSSCT00000050930, ENSSSCT00000059546, ENSSSCT00000061768, ENSSSCT00000065919, XM_021063832, XM_021063833, XM_021063834, XM_021063835, XM_021063836, XM_021063837, XM_021063839, XM_021063840, XM_021063841, XM_021063842, XM_021063843, XM_021063844, XM_021063845, XM_021063846, XM_021063847	9:130172639-130435295:-1	ribosomal protein S6 kinase C1	Cluster0001
RRN3	ENSSSCG00000033356	ENSSSCT00000044185, ENSSSCT00000045768, XM_021086179, XM_021086180	3:7535339-7572389:-1	RRN3 homolog, RNA polymerase I transcription factor	Cluster0001
RRP15	ENSSSCG00000027846	ENSSSCT00000024386, ENSSSCT00000053121, XM_005653761, XM_013978068, XM_021064300	10:8253769-8296143:+1	ribosomal RNA processing 15 homolog	Cluster0001
RSBN1	ENSSSCG00000030154	ENSSSCT00000025140, ENSSSCT00000039380	4:106759050-106806863:+1	round spermatid basic protein 1	Cluster0001
RSBN1L	ENSSSCG00000038977	ENSSSCT00000049333, XM_021102552	9:102363944-102435215:-1	round spermatid basic protein 1 like	Cluster0001
RSF1	ENSSSCG00000014882	ENSSSCT00000016236	9:12128808-12278109:-1	remodeling and spacing factor 1	Cluster0001
RTTN	ENSSSCG00000032574	ENSSSCT00000043505, XM_021099245, XM_021099249, XM_021099260, XM_021099267, XM_021099271, XM_021099277, XM_021099278, XM_021099282, XM_021099283, XM_021099284, XM_021099285	1:152689491-152833961:+1	rotatin	Cluster0001
RUBCN	ENSSSCG00000011853	ENSSSCT00000012965, ENSSSCT00000042106, ENSSSCT00000053334, ENSSSCT00000055908, ENSSSCT00000056979, XM_005670134, XM_005670135, XM_013982359, XM_021068219, XM_021068220, XM_021068221, XM_021068223, XM_021068224	13:134299209-134363695:-1	RUN and cysteine rich domain containing beclin 1 interacting protein	Cluster0001
RUFY2	ENSSSCG00000010239	ENSSSCT00000011206, XM_021073521	14:71500830-71544880:-1	RUN and FYVE domain containing 2	Cluster0001
S100Z	ENSSSCG00000014092	ENSSSCT00000036069, XM_003123714	2:85767571-85770957:+1	S100 calcium binding protein Z	Cluster0001
SACM1L	ENSSSCG00000027176	ENSSSCT00000029881, XM_003358405, XM_021068641	13:28817244-28892013:+1	SAC1 suppressor of actin mutations 1 like (yeast)	Cluster0001
SAMD5	ENSSSCG00000004112	ENSSSCT00000004547, XM_005659159, XM_021072102	1:18284157-18289758:-1	sterile alpha motif domain containing 5	Cluster0001
SAMD8	ENSSSCG00000010319	ENSSSCT00000011296, ENSSSCT00000037641, XM_005671120, XM_005671121, XM_013983359, XM_013983360, XM_013983361, XM_021073146	14:77679281-77737658:+1	sterile alpha motif domain containing 8	Cluster0001
SBF2	ENSSSCG00000013409	ENSSSCT00000014649, ENSSSCT00000024151, ENSSSCT00000051649, ENSSSCT00000064321, ENSSSCT00000066259, XM_003122980, XM_005661131, XM_013994573	2:49241933-49691760:+1	SET binding factor 2	Cluster0001
SBNO1	ENSSSCG00000009776	ENSSSCT00000010718, ENSSSCT00000039568, ENSSSCT00000048707, ENSSSCT00000054058, XM_021073992, XM_021073994, XM_021073995, XM_021073996, XM_021073997	14:29559155-29620696:+1	strawberry notch homolog 1	Cluster0001
SCAF11	ENSSSCG00000000806	ENSSSCT00000000875, ENSSSCT00000023077, ENSSSCT00000031177, ENSSSCT00000045668, ENSSSCT00000051539, ENSSSCT00000054901, ENSSSCT00000060867, XM_005664158, XM_021092988, XM_021092989, XM_021092990, XM_021092991, XM_021092992	5:76807231-76876613:-1	SR-related CTD associated factor 11	Cluster0001
SCAF8	ENSSSCG00000004070	ENSSSCT00000004499, ENSSSCT00000048023, ENSSSCT00000056077, ENSSSCT00000057187, ENSSSCT00000062929, ENSSSCT00000065131, XM_021072006, XM_021072011, XM_021072016, XM_021072020, XM_021072034, XM_021072042, XM_021072047, XM_021072049	1:11929991-12146676:-1	SR-related CTD associated factor 8	Cluster0001
SCUBE3	ENSSSCG00000001536	ENSSSCT00000001711, ENSSSCT00000065256, XM_013977806, XM_021098614, XM_021098615	7:31114281-31154151:+1	signal peptide, CUB domain and EGF like domain containing 3	Cluster0001
SCYL2	ENSSSCG00000000877	ENSSSCT00000000960, ENSSSCT00000029830, ENSSSCT00000040713, ENSSSCT00000045567, ENSSSCT00000049215, ENSSSCT00000053383, XM_021092720, XM_021092721, XM_021092722, XM_021092724	5:83812681-83879088:-1	SCY1 like pseudokinase 2	Cluster0001
SEC22A	ENSSSCG00000024904	ENSSSCT00000023567, ENSSSCT00000039608, ENSSSCT00000039895, ENSSSCT00000045491, ENSSSCT00000057928, XM_021070245, XM_021070246, XM_021070247, XM_021070249, XM_021070250, XM_021070251	13:137173825-137250704:-1	SEC22 homolog A, vesicle trafficking protein	Cluster0001
SEC22C	ENSSSCG00000034200	ENSSSCT00000040625, ENSSSCT00000056387, XM_005669387, XM_005669390, XM_005669393, XM_013981500, XM_013981501, XM_013981502, XM_021068234, XM_021068235, XM_021068236, XM_021068237, XM_021068238, XM_021068239, XM_021068240, XM_021068241	13:26082586-26108241:-1	SEC22 homolog C, vesicle trafficking protein	Cluster0001
SEC23IP	ENSSSCG00000010690	ENSSSCT00000011691, XM_021073464	14:129758371-129801477:+1	SEC23 interacting protein	Cluster0001
SEC24B	ENSSSCG00000009142	ENSSSCT00000010010, ENSSSCT00000042746, XM_021101680, XM_021101682, XM_021101683	8:112670533-112762870:-1	SEC24 homolog B, COPII coat complex component	Cluster0001
SELENOI	ENSSSCG00000030643	ENSSSCT00000023702, XM_021085655	3:112631902-112671085:-1	selenoprotein I	Cluster0001
SELENOT	ENSSSCG00000036920	ENSSSCT00000046666	13:90818332-90842346:+1	selenoprotein T	Cluster0001
SENP1	ENSSSCG00000000816	ENSSSCT00000000889, ENSSSCT00000062578, ENSSSCT00000064113, ENSSSCT00000065021, XM_005664162, XM_013997973, XM_013997974, XM_013997976, XM_013997978, XM_013997979	5:78423137-78476313:-1	SUMO1/sentrin specific peptidase 1	Cluster0001
SENP2	ENSSSCG00000011794	ENSSSCT00000012906, ENSSSCT00000029102, XM_021069989, XM_021069990, XM_021069991, XM_021069992, XM_021069993, XM_021069994, XM_021069995, XM_021069996	13:123429980-123473415:+1	SUMO1/sentrin/SMT3 specific peptidase 2	Cluster0001
SENP6	ENSSSCG00000020702	ENSSSCT00000026640, ENSSSCT00000037375, ENSSSCT00000038303, ENSSSCT00000058321, ENSSSCT00000064205, XM_021092294, XM_021092296, XM_021092302, XM_021092307, XM_021092309	1:90166647-90300286:-1	SUMO1/sentrin specific peptidase 6	Cluster0001
SENP7	ENSSSCG00000021791	ENSSSCT00000022387, ENSSSCT00000039429, ENSSSCT00000040456, ENSSSCT00000042835, ENSSSCT00000058114, XM_013990163	13:157504281-157672814:+1	SUMO1/sentrin specific peptidase 7	Cluster0001
SESN3	ENSSSCG00000037015	ENSSSCT00000042442, XM_003129758	9:27207236-27279173:-1	sestrin 3	Cluster0001
SESTD1	ENSSSCG00000016005	ENSSSCT00000017426, ENSSSCT00000017427, ENSSSCT00000065199, XM_003133513, XM_021075318, XM_021075319, XM_021075320, XM_021075321, XM_021075322	15:84760560-84958521:-1	SEC14 and spectrin domain containing 1	Cluster0001
SETBP1	ENSSSCG00000004490	ENSSSCT00000004961, XM_013988555, XM_013988558, XM_021092436, XM_021092446, XM_021092449	1:94314556-94663029:+1	SET binding protein 1	Cluster0001
SETD2	ENSSSCG00000011332	ENSSSCT00000012409, ENSSSCT00000042293, ENSSSCT00000044654, ENSSSCT00000051013, XM_021068704	13:29884710-29996359:-1	SET domain containing 2	Cluster0001
SETD5	ENSSSCG00000011540	ENSSSCT00000012630, ENSSSCT00000012635, ENSSSCT00000047624, ENSSSCT00000048743, ENSSSCT00000049786, ENSSSCT00000051320, ENSSSCT00000056097, ENSSSCT00000058035, ENSSSCT00000061370, ENSSSCT00000066352, XM_013981946	13:65759965-65854432:+1	SET domain containing 5	Cluster0001
SETD9	ENSSSCG00000016919	ENSSSCT00000018425, ENSSSCT00000048917, ENSSSCT00000058197, XM_003133974	16:35980163-35988779:+1	SET domain containing 9	Cluster0001
SETDB2	ENSSSCG00000009395	ENSSSCT00000010294, ENSSSCT00000048316, ENSSSCT00000048559, ENSSSCT00000050377, XM_003130966, XM_013980507, XM_013980508, XM_013980509, XM_013980512, XM_021065313, XM_021065314	11:18251218-18297826:-1	SET domain bifurcated 2	Cluster0001
SHOC2	ENSSSCG00000010628	ENSSSCT00000011624, ENSSSCT00000059486, ENSSSCT00000066370, XM_001927493, XM_005671457, XM_005671458, XM_013983728	14:121347933-121445558:+1	SHOC2, leucine rich repeat scaffold protein	Cluster0001
SHPRH	ENSSSCG00000004120	ENSSSCT00000004555, ENSSSCT00000039335, ENSSSCT00000044986, ENSSSCT00000060565, XM_013992509, XM_013992510, XM_021087080, XM_021087086	1:19612823-19695273:+1	SNF2 histone linker PHD RING helicase	Cluster0001
SIKE1	ENSSSCG00000006751	ENSSSCT00000007396, ENSSSCT00000045016	4:105779808-105790688:+1	suppressor of IKBKE 1	Cluster0001
SIRT1	ENSSSCG00000010235	ENSSSCT00000011202, XM_021072203, XM_021072204	14:71091167-71122936:+1	sirtuin 1	Cluster0001
SKIL	ENSSSCG00000011746	ENSSSCT00000012857, ENSSSCT00000054581, XM_021069797	13:109029856-109059171:+1	SKI like proto-oncogene	Cluster0001
SLC10A7	ENSSSCG00000009035	ENSSSCT00000009895, ENSSSCT00000039687, XM_021100286, XM_021100287	8:82115069-82355655:+1	solute carrier family 10 member 7	Cluster0001
SLC18B1	ENSSSCG00000004178	ENSSSCT00000004617, XM_001924949, XM_005652674, XM_013988250, XM_013988257, XM_021087825, XM_021087839	1:30923524-30957745:+1	solute carrier family 18 member B1	Cluster0001
SLC25A16	ENSSSCG00000022303	ENSSSCT00000026289, ENSSSCT00000033713, XM_021072451, XM_021072452	14:71612206-71651107:-1	solute carrier family 25 member 16	Cluster0001
SLC25A36	ENSSSCG00000036855	ENSSSCT00000039971, ENSSSCT00000063584, XM_013982079	13:81749989-81791923:+1	solute carrier family 25 member 36	Cluster0001
SLC25A40	ENSSSCG00000026177	ENSSSCT00000028088, ENSSSCT00000060095, XM_021102524, XM_021102525, XM_021102526, XM_021102527	9:92481534-92528207:+1	solute carrier family 25 member 40	Cluster0001
SLC2A7	ENSSSCG00000003390	ENSSSCT00000003761, XM_021095281	6:69481119-69503994:-1	solute carrier family 2 member 7	Cluster0001
SLC30A4	ENSSSCG00000004668	ENSSSCT00000005154, ENSSSCT00000042133, ENSSSCT00000052964, ENSSSCT00000060812	1:126236792-126268096:+1	solute carrier family 30 member 4	Cluster0001
SLC30A6	ENSSSCG00000008518	ENSSSCT00000009322, ENSSSCT00000038324, ENSSSCT00000041509, ENSSSCT00000043276, ENSSSCT00000052851, XM_021085560, XM_021085561, XM_021085563	3:107387859-107426744:-1	solute carrier family 30 member 6	Cluster0001
SLC35A1	ENSSSCG00000004304	ENSSSCT00000004759, ENSSSCT00000051469, XM_003353254, XM_021089797	1:55859614-55895782:+1	solute carrier family 35 member A1	Cluster0001
SLC35A5	ENSSSCG00000011929	ENSSSCT00000013053, ENSSSCT00000046667	13:147252707-147279323:-1	solute carrier family 35 member A5	Cluster0001
SLC35B3	ENSSSCG00000001033	ENSSSCT00000001126, ENSSSCT00000049112, XM_021100161, XM_021100163, XM_021100164, XM_021100165, XM_021100166	7:5581756-5606551:-1	solute carrier family 35 member B3	Cluster0001
SLC35D2	.	XM_021063996, XM_021063997	.	solute carrier family 35 member D2	Cluster0001
SLC35E1	ENSSSCG00000013861	ENSSSCT00000015140, ENSSSCT00000042579	2:61037726-61058093:+1	solute carrier family 35 member E1	Cluster0001
SLC36A3	ENSSSCG00000038877	ENSSSCT00000046387, XM_021077075, XM_021077076	16:71686370-71734972:+1	solute carrier family 36 member 3	Cluster0001
SLC36A4	ENSSSCG00000024933	ENSSSCT00000023503, XM_013979268, XM_021062637	9:25639387-25689028:-1	solute carrier family 36 member 4	Cluster0001
SLC5A3	ENSSSCG00000034167	ENSSSCT00000065757	13:197688632-197718695:+1	solute carrier family 5 member 3	Cluster0001
SLC5A8	ENSSSCG00000000871	ENSSSCT00000000951	5:82973250-83030996:+1	solute carrier family 5 member 8	Cluster0001
SLC6A4	ENSSSCG00000017797	ENSSSCT00000019369, ENSSSCT00000047751, ENSSSCT00000053012, ENSSSCT00000061541, ENSSSCT00000065916, XM_021067520, XM_021067522	12:46283610-46327787:-1	solute carrier family 6 member 4	Cluster0001
SLC9A8	ENSSSCG00000007466	ENSSSCT00000008170, XM_021077955, XM_021077956, XM_021077957	17:51400910-51477217:+1	solute carrier family 9 member A8	Cluster0001
SLC9A9	ENSSSCG00000011686	ENSSSCT00000012794, ENSSSCT00000041604, XM_021071130, XM_021071131, XM_021071132, XM_021071133	13:83893458-84502196:-1	solute carrier family 9 member A9	Cluster0001
SLF2	ENSSSCG00000037592	ENSSSCT00000057557	14:111996933-112046072:+1	SMC5-SMC6 complex localization factor protein 2	Cluster0001
SLFN14	ENSSSCG00000031114	ENSSSCT00000046309, ENSSSCT00000060694, ENSSSCT00000061607	12:39950502-39964565:+1	schlafen family member 14	Cluster0001
SLK	ENSSSCG00000010606	ENSSSCT00000011602, ENSSSCT00000061849, XM_001929430, XM_005671435	14:114898852-114957490:+1	STE20 like kinase	Cluster0001
SLTM	ENSSSCG00000004592	ENSSSCT00000005071, ENSSSCT00000005073, ENSSSCT00000037087, ENSSSCT00000039763, ENSSSCT00000043725, ENSSSCT00000052540, XM_021073578, XM_021073584, XM_021073587, XM_021073590, XM_021073596, XM_021073604, XM_021073609, XM_021073614, XM_021073617, XM_021073618, XM_021073623, XM_021073626, XM_021073634, XM_021073639, XM_021073646, XM_021073653, XM_021073663, XM_021073671	1:113084864-113136206:+1	SAFB like transcription modulator	Cluster0001
SLU7	ENSSSCG00000017033	ENSSSCT00000018545	16:63118710-63136234:+1	SLU7 homolog, splicing factor	Cluster0001
SMAD2	ENSSSCG00000004505	ENSSSCT00000004977, ENSSSCT00000042255, ENSSSCT00000045010, ENSSSCT00000046471, ENSSSCT00000054452, XM_005659448, XM_005659449, XM_013992841, XM_021092635, XM_021092745, XM_021092986	1:97415716-97511880:-1	SMAD family member 2	Cluster0001
SMAD4	ENSSSCG00000004524	ENSSSCT00000004997, ENSSSCT00000039851, ENSSSCT00000041073, ENSSSCT00000045286, ENSSSCT00000058124, ENSSSCT00000059572, XM_005654429, XM_013985326	1:100514791-100632822:+1	SMAD family member 4	Cluster0001
SMAD5	ENSSSCG00000014319	ENSSSCT00000015645, ENSSSCT00000036284, ENSSSCT00000041137, ENSSSCT00000053829, XM_021084785, XM_021084786, XM_021084787, XM_021084788	2:138287431-138344762:+1	SMAD family member 5	Cluster0001
SMAP1	ENSSSCG00000004276	ENSSSCT00000004726, ENSSSCT00000050145, ENSSSCT00000051535, ENSSSCT00000052276, ENSSSCT00000052865, ENSSSCT00000056202, ENSSSCT00000057791, XM_021089443, XM_021089445, XM_021089451, XM_021089462, XM_021089472, XM_021089481	1:50721701-50945633:+1	small ArfGAP 1	Cluster0001
SMARCA5	ENSSSCG00000009047	ENSSSCT00000009907, ENSSSCT00000064754, XM_003129174	8:84137838-84224877:-1	SWI/SNF related, matrix associated, actin dependent regulator of chromatin, subfamily a, member 5	Cluster0001
SMARCAD1	ENSSSCG00000009193	ENSSSCT00000010066, ENSSSCT00000045825, ENSSSCT00000054734, XM_005666984, XM_005666985, XM_021101760	8:125409490-125488481:-1	SWI/SNF-related, matrix-associated actin-dependent regulator of chromatin, subfamily a, containing DEAD/H box 1	Cluster0001
SMC5	.	XM_021064741, XM_021064744, XM_021064752	.	structural maintenance of chromosomes 5	Cluster0001
SMCHD1	ENSSSCG00000029030	ENSSSCT00000024634, ENSSSCT00000025549, ENSSSCT00000029309, XM_021096137, XM_021096138	6:103808904-103986144:-1	structural maintenance of chromosomes flexible hinge domain containing 1	Cluster0001
SMG1	ENSSSCG00000032531	ENSSSCT00000054147, ENSSSCT00000054686, XM_021086547, XM_021086548, XM_021086549, XM_021086550, XM_021086551, XM_021086552	3:26653779-26753738:+1	SMG1, nonsense mediated mRNA decay associated PI3K related kinase	Cluster0001
SMG7	ENSSSCG00000015558	ENSSSCT00000016948, ENSSSCT00000026288, ENSSSCT00000048611, ENSSSCT00000053586, XM_003357575, XM_005667813, XM_005667816, XM_021063785, XM_021063786, XM_021063787, XM_021063788, XM_021063790, XM_021063791, XM_021063792, XM_021063793, XM_021063794, XM_021063795, XM_021063796	9:124696426-124775737:+1	SMG7, nonsense mediated mRNA decay factor	Cluster0001
SMIM19	ENSSSCG00000031857	ENSSSCT00000039304, ENSSSCT00000047679	17:11549516-11569655:+1	small integral membrane protein 19	Cluster0001
SMU1	ENSSSCG00000010999	ENSSSCT00000012041, ENSSSCT00000060863	10:33399331-33441638:+1	SMU1, DNA replication regulator and spliceosomal factor	Cluster0001
SNX13	ENSSSCG00000024761	ENSSSCT00000029645, ENSSSCT00000048803, ENSSSCT00000063406, XM_003357459, XM_021063410	9:86964041-87086580:-1	sorting nexin 13	Cluster0001
SNX14	ENSSSCG00000004293	ENSSSCT00000004747, XM_001927319	1:54460815-54549309:-1	sorting nexin 14	Cluster0001
SNX16	ENSSSCG00000006151	ENSSSCT00000006745, ENSSSCT00000053302, ENSSSCT00000060128, XM_001926702, XM_013988064	4:54801358-54837981:+1	sorting nexin 16	Cluster0001
SOCS4	ENSSSCG00000032332	ENSSSCT00000064961, XM_005659980	1:184379016-184398896:+1	suppressor of cytokine signaling 4	Cluster0001
SOCS5	ENSSSCG00000008437	ENSSSCT00000009238, ENSSSCT00000060362, XM_021085624, XM_021085625	3:93783898-93854419:-1	suppressor of cytokine signaling 5	Cluster0001
SON	ENSSSCG00000023674	ENSSSCT00000026483, ENSSSCT00000060699, ENSSSCT00000063351, ENSSSCT00000065483, XM_003358932, XM_005657147	13:197161237-197197123:+1	SON DNA binding protein	Cluster0001
SOS1	ENSSSCG00000008478	ENSSSCT00000009279, ENSSSCT00000009280, ENSSSCT00000039269, ENSSSCT00000044630, ENSSSCT00000054983, ENSSSCT00000061552, XM_021087587, XM_021087588, XM_021087589	3:101089243-101362724:+1	SOS Ras/Rac guanine nucleotide exchange factor 1	Cluster0001
SOS2	ENSSSCG00000005015	ENSSSCT00000005531, ENSSSCT00000063003, XM_021101439	1:179907590-180069092:-1	SOS Ras/Rho guanine nucleotide exchange factor 2	Cluster0001
SP3	ENSSSCG00000015962	ENSSSCT00000017380, XM_021075841, XM_021075842	15:79935363-79985778:-1	Sp3 transcription factor	Cluster0001
SP4	ENSSSCG00000015378	ENSSSCT00000016753, ENSSSCT00000046035, ENSSSCT00000053051, ENSSSCT00000057177, ENSSSCT00000060410, XM_003482682	9:90336690-90410527:+1	Sp4 transcription factor	Cluster0001
SPACA6	ENSSSCG00000003238	ENSSSCT00000003597	6:58321914-58331374:-1	sperm acrosome associated 6	Cluster0001
SPART	ENSSSCG00000024635	ENSSSCT00000010250, ENSSSCT00000027170, ENSSSCT00000039012	11:12313216-12365426:-1	spartin	Cluster0001
SPATA1	ENSSSCG00000029882	ENSSSCT00000022406, XM_021096354	6:129209185-129238893:-1	spermatogenesis associated 1	Cluster0001
SPATA5L1	ENSSSCG00000004671	ENSSSCT00000005157, ENSSSCT00000066317	1:126314755-126335391:-1	spermatogenesis associated 5 like 1	Cluster0001
SPEN	ENSSSCG00000034484	ENSSSCT00000042154, ENSSSCT00000064339, XM_021095393	6:75001088-75103474:+1	spen family transcriptional repressor	Cluster0001
SPIN3	ENSSSCG00000032692	ENSSSCT00000041788, XM_005673679	X:49351996-49356811:-1	spindlin family member 3	Cluster0001
SPOPL	ENSSSCG00000032198	ENSSSCT00000038678, ENSSSCT00000059167, XM_013983941, XM_013983943, XM_021075289	15:13134225-13207737:-1	speckle type BTB/POZ protein like	Cluster0001
SPRED1	ENSSSCG00000039393	ENSSSCT00000055368, XM_013985631	1:132904275-133016243:-1	sprouty related EVH1 domain containing 1	Cluster0001
SPRTN	ENSSSCG00000040087	ENSSSCT00000049185	14:59172201-59192225:-1	SprT-like N-terminal domain	Cluster0001
SRBD1	ENSSSCG00000008445	ENSSSCT00000009247, ENSSSCT00000044314, ENSSSCT00000046422, XM_021087562, XM_021087563	3:94909139-95134517:+1	S1 RNA binding domain 1	Cluster0001
SRGAP1	ENSSSCG00000029815	ENSSSCT00000025861, ENSSSCT00000062028, XM_021091938, XM_021091939	5:28300950-28605119:+1	SLIT-ROBO Rho GTPase activating protein 1	Cluster0001
SRPK1	ENSSSCG00000001554	ENSSSCT00000001732, ENSSSCT00000039757, ENSSSCT00000049454, ENSSSCT00000056511, ENSSSCT00000058591, ENSSSCT00000059532, ENSSSCT00000062109, XM_005665912	7:31645755-31701405:-1	SRSF protein kinase 1	Cluster0001
SRSF12	ENSSSCG00000032781	ENSSSCT00000039409, XM_021085130	1:57147075-57165800:-1	serine and arginine rich splicing factor 12	Cluster0001
SS18	ENSSSCG00000003716	ENSSSCT00000004116, ENSSSCT00000036742, ENSSSCT00000041526, ENSSSCT00000044354, ENSSSCT00000056678, ENSSSCT00000059468, ENSSSCT00000065907, ENSSSCT00000066204	6:110629086-110790517:-1	SS18, nBAF chromatin remodeling complex subunit	Cluster0001
SS18L1	ENSSSCG00000035448	ENSSSCT00000027440, ENSSSCT00000065314	17:61571687-61598099:+1	SS18L1, nBAF chromatin remodeling complex subunit	Cluster0001
ST7L	ENSSSCG00000006779	ENSSSCT00000007425, ENSSSCT00000037780, ENSSSCT00000043728, ENSSSCT00000046600, ENSSSCT00000056333, ENSSSCT00000064851, XM_005655448, XM_013988151, XM_013988153, XM_021090743, XM_021090744, XM_021090746, XM_021090747, XM_021090748, XM_021090749, XM_021090750, XM_021090751, XM_021090752, XM_021090753, XM_021090755	4:107821381-107976340:+1	suppression of tumorigenicity 7 like	Cluster0001
STAG1	ENSSSCG00000011652	ENSSSCT00000012754, ENSSSCT00000012756, ENSSSCT00000060294, XM_021071121, XM_021071122, XM_021071123	13:77321880-77863508:-1	stromal antigen 1	Cluster0001
STAG2	ENSSSCG00000012642	ENSSSCT00000013823, ENSSSCT00000033199, ENSSSCT00000033242, ENSSSCT00000048514, ENSSSCT00000049710, ENSSSCT00000051232, ENSSSCT00000063134, XM_005673884, XM_005673885, XM_005673887, XM_013986402, XM_013986404, XM_021080224, XM_021080225, XM_021080226, XM_021080227, XM_021080228, XM_021080230, XM_021080231, XM_021080232	X:101477233-101617563:+1	stromal antigen 2	Cluster0001
STAM2	ENSSSCG00000016399	ENSSSCT00000017856, ENSSSCT00000040963, ENSSSCT00000049379, XM_013997353, XM_021076487, XM_021076488	15:115119-167698:+1	signal transducing adaptor molecule 2	Cluster0001
STIM2	ENSSSCG00000008762	ENSSSCT00000009587, ENSSSCT00000023243, ENSSSCT00000059551, XM_003128897	8:20456243-20609281:+1	stromal interaction molecule 2	Cluster0001
STON2	ENSSSCG00000002412	ENSSSCT00000002681, ENSSSCT00000039865, XM_005656442, XM_021099578, XM_021099579, XM_021099580, XM_021099581, XM_021099582	7:104039514-104190377:-1	stonin 2	Cluster0001
STPG2	ENSSSCG00000009188	ENSSSCT00000010061, ENSSSCT00000040653, ENSSSCT00000044046, ENSSSCT00000058512, XM_021101745	8:122114575-122338603:+1	sperm tail PG-rich repeat containing 2	Cluster0001
STRBP	ENSSSCG00000005582	ENSSSCT00000006135, ENSSSCT00000050780, ENSSSCT00000052201, ENSSSCT00000057725, ENSSSCT00000064320, XM_021074603, XM_021074606, XM_021074611	1:264045670-264195963:-1	spermatid perinuclear RNA binding protein	Cluster0001
STX17	ENSSSCG00000005386	ENSSSCT00000005928, ENSSSCT00000046121, ENSSSCT00000053491, XM_005660277	1:241657506-241764960:+1	syntaxin 17	Cluster0001
STXBP3	ENSSSCG00000006845	ENSSSCT00000007494, ENSSSCT00000007497, ENSSSCT00000039057, ENSSSCT00000042059, ENSSSCT00000042570, XM_021090106	4:111233280-111347487:-1	syntaxin binding protein 3	Cluster0001
STXBP4	ENSSSCG00000017602	ENSSSCT00000019163, XM_021067243, XM_021067244, XM_021067245, XM_021067246	12:31298157-31469457:+1	syntaxin binding protein 4	Cluster0001
STYX	ENSSSCG00000005039	ENSSSCT00000005555, ENSSSCT00000038827, ENSSSCT00000041008, XM_005659958, XM_005659959, XM_013993418, XM_013993419, XM_021102038	1:182357607-182407784:+1	serine/threonine/tyrosine interacting protein	Cluster0001
SUCO	ENSSSCG00000015485	ENSSSCT00000016869, XM_003357538	9:114917314-115006352:+1	SUN domain containing ossification factor	Cluster0001
SUGP1	.	XM_021083429	.	SURP and G-patch domain containing 1	Cluster0001
SUPT20H	ENSSSCG00000009359	ENSSSCT00000010256, ENSSSCT00000037044, ENSSSCT00000040086, ENSSSCT00000043361, ENSSSCT00000052734, ENSSSCT00000053123, ENSSSCT00000060979, XM_021065219, XM_021065220, XM_021065221, XM_021065222, XM_021065223, XM_021065224, XM_021065225, XM_021065226, XM_021065227, XM_021065228, XM_021065229, XM_021065230, XM_021065231, XM_021065232, XM_021065233, XM_021065234, XM_021065235, XM_021065236, XM_0210…	11:12825759-12865253:-1	SPT20 homolog, SAGA complex component	Cluster0001
SUZ12	ENSSSCG00000017744	ENSSSCT00000019312, ENSSSCT00000043030, ENSSSCT00000052927, XM_003131745, XM_005669065, XM_005669069	12:42983388-43032751:-1	SUZ12 polycomb repressive complex 2 subunit	Cluster0001
SWT1	ENSSSCG00000015569	ENSSSCT00000016960, ENSSSCT00000037950, ENSSSCT00000040797, ENSSSCT00000055779, XM_005667828, XM_013979933	9:126347586-126452887:+1	SWT1, RNA endoribonuclease homolog	Cluster0001
SYNRG	ENSSSCG00000026596	ENSSSCT00000028499, ENSSSCT00000036739, ENSSSCT00000046617, ENSSSCT00000049452, ENSSSCT00000049980, ENSSSCT00000061712, XM_013989945, XM_021067343, XM_021067344, XM_021067345, XM_021067346, XM_021067347, XM_021067349, XM_021067350, XM_021067351, XM_021067352, XM_021067353, XM_021067354, XM_021067355, XM_021067356, XM_021067357, XM_021067359, XM_021067360, XM_021067361, XM_021067362, XM_021067363,…	12:38976023-39069868:-1	synergin gamma	Cluster0001
TAF1B	ENSSSCG00000008637	ENSSSCT00000009449, XM_021087858, XM_021087859, XM_021087860, XM_021087861	3:126523620-126586748:-1	TATA-box binding protein associated factor, RNA polymerase I subunit B	Cluster0001
TAF2	ENSSSCG00000006000	ENSSSCT00000006583, ENSSSCT00000033583, ENSSSCT00000035390, ENSSSCT00000055155, ENSSSCT00000061987, XM_021090551	4:19161226-19276501:+1	TATA-box binding protein associated factor 2	Cluster0001
TAF9B	ENSSSCG00000026714	ENSSSCT00000023290, ENSSSCT00000029310, ENSSSCT00000050614, ENSSSCT00000052639, ENSSSCT00000065816, XM_013986250, XM_013986251	X:62212657-62229026:-1	TATA-box binding protein associated factor 9b	Cluster0001
TAOK1	ENSSSCG00000017790	ENSSSCT00000019362, XM_003483075	12:45597002-45744809:+1	TAO kinase 1	Cluster0001
TARBP1	ENSSSCG00000010160	ENSSSCT00000011124, ENSSSCT00000049578, ENSSSCT00000056947, ENSSSCT00000057981, XM_005670967	14:56669622-56746312:+1	TAR (HIV-1) RNA binding protein 1	Cluster0001
TASOR	ENSSSCG00000024201	ENSSSCT00000028725, ENSSSCT00000045728, ENSSSCT00000048219	13:38491056-38557931:-1	transcription activation suppressor	Cluster0001
TASP1	ENSSSCG00000007074	ENSSSCT00000007745, ENSSSCT00000022973, ENSSSCT00000040258, ENSSSCT00000043473, ENSSSCT00000047206, ENSSSCT00000050893, ENSSSCT00000052394, ENSSSCT00000057957, XM_013985076, XM_013985078, XM_013985079, XM_021078003, XM_021078004, XM_021078005, XM_021078006, XM_021078007	17:21949606-22357662:-1	taspase 1	Cluster0001
TATDN1	ENSSSCG00000030603	ENSSSCT00000029865, ENSSSCT00000032699, ENSSSCT00000034999, ENSSSCT00000035892, ENSSSCT00000053540, ENSSSCT00000060443, XM_005662855, XM_021088663, XM_021088664, XM_021088665	4:15113037-15159498:+1	TatD DNase domain containing 1	Cluster0001
TATDN3	ENSSSCG00000015592	ENSSSCT00000016985, ENSSSCT00000049456, ENSSSCT00000062542, ENSSSCT00000065731, XM_003130403, XM_003130404, XM_005667850, XM_013979957, XM_013979958, XM_013979959, XM_013979960, XM_013979961, XM_013979962, XM_021063851	9:130590486-130623050:-1	TatD DNase domain containing 3	Cluster0001
TAX1BP1	ENSSSCG00000016692	ENSSSCT00000018173, ENSSSCT00000036364, ENSSSCT00000043680, ENSSSCT00000058734, ENSSSCT00000059402, XM_021079291, XM_021079293, XM_021079294	18:44823858-44910731:-1	Tax1 binding protein 1	Cluster0001
TBC1D15	ENSSSCG00000000512	ENSSSCT00000000551, ENSSSCT00000042002, ENSSSCT00000048467, XM_001925336, XM_003355517	5:35827440-35908180:+1	TBC1 domain family member 15	Cluster0001
TBC1D23	ENSSSCG00000030486	ENSSSCT00000030794, ENSSSCT00000040945, XM_021071307, XM_021071308	13:158665077-158729282:-1	TBC1 domain family member 23	Cluster0001
TBC1D31	ENSSSCG00000005987	ENSSSCT00000006570, ENSSSCT00000025217, ENSSSCT00000041765, ENSSSCT00000042108, ENSSSCT00000043801, ENSSSCT00000044289, ENSSSCT00000054858, ENSSSCT00000061971, ENSSSCT00000062974, ENSSSCT00000064984, XM_013996507, XM_021088959, XM_021088960, XM_021088961, XM_021088962, XM_021088963, XM_021088964, XM_021088965, XM_021088966, XM_021088967, XM_021088968, XM_021088971	4:16212553-16288167:-1	TBC1 domain family member 31	Cluster0001
TBC1D5	ENSSSCG00000011199	ENSSSCT00000012264, ENSSSCT00000012265, ENSSSCT00000048133, ENSSSCT00000060482, XM_021069679, XM_021069681, XM_021069682, XM_021069683, XM_021069684, XM_021069685, XM_021069686	13:4201100-4764226:-1	TBC1 domain family member 5	Cluster0001
TBC1D9	ENSSSCG00000032741	ENSSSCT00000009921, ENSSSCT00000043750, ENSSSCT00000044420, ENSSSCT00000065068, XM_021101555	8:86403426-86521688:+1	TBC1 domain family member 9	Cluster0001
TBCCD1	ENSSSCG00000011797	ENSSSCT00000012909, ENSSSCT00000055755, ENSSSCT00000060953, ENSSSCT00000066258, XM_005652362, XM_005652366, XM_021068227, XM_021068228, XM_021068229	13:124363457-124388392:-1	TBCC domain containing 1	Cluster0001
TBCK	ENSSSCG00000021784	ENSSSCT00000031175, ENSSSCT00000041750, ENSSSCT00000048474, ENSSSCT00000055701, XM_021101698, XM_021101699, XM_021101700	8:115476956-115701468:+1	TBC1 domain containing kinase	Cluster0001
TBK1	ENSSSCG00000031103	ENSSSCT00000040775, ENSSSCT00000044524, ENSSSCT00000051932, ENSSSCT00000061881, ENSSSCT00000062705, ENSSSCT00000066145, XM_021090852, XM_021090853, XM_021090854	5:28880205-28929963:+1	TANK binding kinase 1	Cluster0001
TBL1XR1	ENSSSCG00000011760	ENSSSCT00000012871, ENSSSCT00000028290, ENSSSCT00000038018, ENSSSCT00000038564, ENSSSCT00000047161, ENSSSCT00000056472, ENSSSCT00000057255, ENSSSCT00000058021, ENSSSCT00000058149, ENSSSCT00000063961, XM_003132542, XM_021071196, XM_021071197, XM_021071199, XM_021071200, XM_021071202, XM_021071205, XM_021071207, XM_021071208, XM_021071210, XM_021071211	13:115311025-115488354:-1	transducin beta like 1 X-linked receptor 1	Cluster0001
TCAIM	ENSSSCG00000031304	ENSSSCT00000040053, ENSSSCT00000048164, ENSSSCT00000053555, ENSSSCT00000063549, XM_021071724	13:27647870-27703546:+1	T-cell activation inhibitor, mitochondrial	Cluster0001
TCEANC2	ENSSSCG00000021216	ENSSSCT00000029087, XM_005665408, XM_013999364, XM_013999365	6:158219136-158261729:-1	transcription elongation factor A N-terminal and central domain containing 2	Cluster0001
TDG	ENSSSCG00000000847	ENSSSCT00000000924, XM_021092634	5:80437959-80492252:-1	thymine DNA glycosylase	Cluster0001
TDRD3	ENSSSCG00000009449	ENSSSCT00000010359, ENSSSCT00000024660, XM_013980575, XM_021065650, XM_021065651	11:33258041-33440123:+1	tudor domain containing 3	Cluster0001
TEFM	ENSSSCG00000017741	ENSSSCT00000019308, XM_003131737, XM_005669064	12:42864612-42875696:+1	transcription elongation factor, mitochondrial	Cluster0001
TENT4B	ENSSSCG00000040887	ENSSSCT00000039496, ENSSSCT00000045040, ENSSSCT00000053666	6:34603208-34669311:-1	terminal nucleotidyltransferase 4B	Cluster0001
TET1	ENSSSCG00000010241	ENSSSCT00000011209	14:71675671-71812694:+1	tet methylcytosine dioxygenase 1	Cluster0001
TET2	ENSSSCG00000009157	ENSSSCT00000010028, ENSSSCT00000038037, ENSSSCT00000046452, ENSSSCT00000049129, XM_013978993	8:116415272-116545514:-1	tet methylcytosine dioxygenase 2	Cluster0001
TFAM	ENSSSCG00000040185	ENSSSCT00000046982	14:92259542-92279731:-1	transcription factor A, mitochondrial	Cluster0001
TFB2M	ENSSSCG00000023775	ENSSSCT00000032587, ENSSSCT00000037887, ENSSSCT00000048893, XM_021064472, XM_021064473	10:19027223-19046191:-1	transcription factor B2, mitochondrial	Cluster0001
TFCP2	ENSSSCG00000031206	ENSSSCT00000061563, XM_021081711, XM_021081712, XM_021081713	AEMK02000258.1:226608-290224:+1	transcription factor CP2	Cluster0001
TGS1	ENSSSCG00000006251	ENSSSCT00000006850, ENSSSCT00000032365, XM_001927876	4:75937129-75969160:-1	trimethylguanosine synthase 1	Cluster0001
THADA	ENSSSCG00000008459	ENSSSCT00000009261, XM_021088406	3:96875589-97196315:+1	THADA, armadillo repeat containing	Cluster0001
THAP2	ENSSSCG00000021270	ENSSSCT00000027083, XM_003126383	5:35671280-35687414:+1	THAP domain containing 2	Cluster0001
THAP5	ENSSSCG00000038158	ENSSSCT00000055927, XM_003134778	18:36584386-36592905:+1	THAP domain containing 5	Cluster0001
THAP6	ENSSSCG00000029348	ENSSSCT00000026309, ENSSSCT00000041240, ENSSSCT00000048953, XM_005666756	8:71181952-71201912:+1	THAP domain containing 6	Cluster0001
THOC2	ENSSSCG00000012639	ENSSSCT00000013820, ENSSSCT00000040325, ENSSSCT00000045808, ENSSSCT00000055062, ENSSSCT00000060332, XM_013986394, XM_013986395, XM_013986396, XM_021080460, XM_021080461, XM_021080462, XM_021080463, XM_021080464, XM_021080465, XM_021080466, XM_021080467, XM_021080468, XM_021080469	X:101171362-101285370:-1	THO complex 2	Cluster0001
THUMPD2	ENSSSCG00000008470	ENSSSCT00000009272, ENSSSCT00000039948, ENSSSCT00000052081, ENSSSCT00000062890, XM_003481230, XM_013987918, XM_013987919	3:100556833-100600909:+1	THUMP domain containing 2	Cluster0001
THUMPD3	ENSSSCG00000011542	ENSSSCT00000012632, ENSSSCT00000058011, XM_021071098, XM_021071099, XM_021071100, XM_021071101, XM_021071102, XM_021071104	13:65721470-65749299:+1	THUMP domain containing 3	Cluster0001
TIA1	ENSSSCG00000023409	ENSSSCT00000027073, ENSSSCT00000037586, ENSSSCT00000040169, ENSSSCT00000041698, ENSSSCT00000043646, ENSSSCT00000051669, ENSSSCT00000055127, ENSSSCT00000060792, XM_013996070, XM_021087399, XM_021087401, XM_021087403	3:72240590-72277296:+1	TIA1 cytotoxic granule associated RNA binding protein	Cluster0001
TIGD4	ENSSSCG00000038186	ENSSSCT00000043041, ENSSSCT00000058550	8:76270626-76281482:+1	tigger transposable element derived 4	Cluster0001
TIGD7	ENSSSCG00000037309	ENSSSCT00000060893	3:38893694-38900332:+1	tigger transposable element derived 7	Cluster0001
TLK1	ENSSSCG00000015944	ENSSSCT00000017361, ENSSSCT00000058240, ENSSSCT00000061621, ENSSSCT00000063036, XM_001927890, XM_021075292, XM_021075293	15:77171692-77328950:-1	tousled like kinase 1	Cluster0001
TLK2	ENSSSCG00000017301	ENSSSCT00000018837, ENSSSCT00000041301, ENSSSCT00000041446, ENSSSCT00000048621, ENSSSCT00000049337, ENSSSCT00000061479, ENSSSCT00000062575, XM_021068144, XM_021068147, XM_021068148, XM_021068151	12:16129248-16275679:-1	tousled like kinase 2	Cluster0001
TM2D2	ENSSSCG00000028592	ENSSSCT00000023110, ENSSSCT00000057465	15:47601900-47611802:+1	TM2 domain containing 2	Cluster0001
TMEM106B	ENSSSCG00000032740	ENSSSCT00000046979, XM_003130176, XM_021102434	9:81837709-81864209:+1	transmembrane protein 106B	Cluster0001
TMEM107	ENSSSCG00000027528	ENSSSCT00000024863, XM_013990058	12:53393334-53397064:-1	transmembrane protein 107	Cluster0001
TMEM161B	ENSSSCG00000014148	ENSSSCT00000015452, ENSSSCT00000044012, ENSSSCT00000060958, ENSSSCT00000062535, ENSSSCT00000065876, XM_003123774, XM_013994974, XM_013994977, XM_021084516, XM_021084517, XM_021084519, XM_021084520, XM_021084521, XM_021084522, XM_021084523, XM_021084524, XM_021084525, XM_021084526, XM_021084527	2:95579436-95700822:-1	transmembrane protein 161B	Cluster0001
TMEM167A	.	XM_003123759	.	transmembrane protein 167A	Cluster0001
TMEM168	ENSSSCG00000016643	ENSSSCT00000018121, ENSSSCT00000061311, XM_003134765, XM_005673235	18:32927707-32961214:+1	transmembrane protein 168	Cluster0001
TMEM199	ENSSSCG00000040883	ENSSSCT00000039026, XM_003358166	12:44636332-44643505:+1	transmembrane protein 199	Cluster0001
TMEM241	ENSSSCG00000040452	ENSSSCT00000054167, ENSSSCT00000056793, XM_021097744, XM_021097745, XM_021097746, XM_021097747, XM_021097748, XM_021097749	6:108232990-108329763:-1	transmembrane protein 241	Cluster0001
TMEM260	ENSSSCG00000005062	ENSSSCT00000005579, ENSSSCT00000043116, ENSSSCT00000052474, ENSSSCT00000055762, ENSSSCT00000064039, XM_003121823, XM_005659990, XM_013993446	1:185821242-185886556:+1	transmembrane protein 260	Cluster0001
TMEM267	ENSSSCG00000032979	ENSSSCT00000024269, ENSSSCT00000024367, ENSSSCT00000057020, ENSSSCT00000066147, XM_021077012, XM_021077015, XM_021077016, XM_021077017, XM_021077018, XM_021077019, XM_021077021, XM_021077022, XM_021077023, XM_021077024, XM_021077025	16:28027408-28057375:-1	transmembrane protein 267	Cluster0001
TMEM30A	ENSSSCG00000033155	ENSSSCT00000044778, ENSSSCT00000050629, ENSSSCT00000058400, XM_021092349, XM_021092352	1:90643886-90688161:+1	transmembrane protein 30A	Cluster0001
TMEM62	ENSSSCG00000004716	ENSSSCT00000005208, ENSSSCT00000023322, ENSSSCT00000061188, XM_021097069, XM_021097078	1:128269599-128306056:-1	transmembrane protein 62	Cluster0001
TMEM67	ENSSSCG00000006108	ENSSSCT00000006700, ENSSSCT00000039168, ENSSSCT00000039970, ENSSSCT00000040183, ENSSSCT00000049613, ENSSSCT00000050941, ENSSSCT00000052802, XM_021089104, XM_021089105, XM_021089106, XM_021089107, XM_021089109	4:42867765-42931137:-1	transmembrane protein 67	Cluster0001
TMF1	ENSSSCG00000011510	ENSSSCT00000012597, ENSSSCT00000060970, XM_021069200	13:50443795-50477368:-1	TATA element modulatory factor 1	Cluster0001
TMTC3	ENSSSCG00000000927	ENSSSCT00000001012, ENSSSCT00000037954, ENSSSCT00000058626, ENSSSCT00000061331, ENSSSCT00000065817, XM_021092779	5:94308752-94384263:-1	transmembrane and tetratricopeptide repeat containing 3	Cluster0001
TMX3	ENSSSCG00000004884	ENSSSCT00000005390, XM_005654478, XM_021099371	1:153988015-154032757:+1	thioredoxin related transmembrane protein 3	Cluster0001
TNFSF11	ENSSSCG00000009429	ENSSSCT00000010336, XM_001925694	11:24466586-24505422:-1	TNF superfamily member 11	Cluster0001
TNFSF4	ENSSSCG00000015488	ENSSSCT00000016872, XM_021102254, XM_021102255	9:115553329-115572267:-1	TNF superfamily member 4	Cluster0001
TNKS	ENSSSCG00000015851	ENSSSCT00000017259, ENSSSCT00000050161	15:55514267-55681593:-1	tankyrase	Cluster0001
TNKS2	ENSSSCG00000010465	ENSSSCT00000011453, ENSSSCT00000054170, XM_001926556	14:103396273-103461821:+1	tankyrase 2	Cluster0001
TNPO1	ENSSSCG00000027293	ENSSSCT00000026046, ENSSSCT00000052539, XM_003359811, XM_021076714	16:49048679-49151926:+1	transportin 1	Cluster0001
TNRC6A	ENSSSCG00000038870	ENSSSCT00000037676, ENSSSCT00000040546, ENSSSCT00000040687, ENSSSCT00000042519, ENSSSCT00000045367, ENSSSCT00000047880, ENSSSCT00000049514, ENSSSCT00000057934, XM_021081315, XM_021081316, XM_021081317, XM_021081319, XM_021081320, XM_021081321, XM_021081322, XM_021081323, XM_021081324, XM_021081325, XM_021081326, XM_021081330, XM_021081334, XM_021081335, XM_021081336, XM_021081339	AEMK02000510.1:580337-823839:-1	trinucleotide repeat containing 6A	Cluster0001
TNRC6B	ENSSSCG00000000078	ENSSSCT00000000084, ENSSSCT00000038352, ENSSSCT00000048750, ENSSSCT00000049384, ENSSSCT00000064217, ENSSSCT00000065531, XM_021092843, XM_021092845, XM_021092846	5:8060526-8311105:-1	trinucleotide repeat containing 6B	Cluster0001
TOGARAM1	ENSSSCG00000027765	ENSSSCT00000025268, ENSSSCT00000037091, ENSSSCT00000039813, ENSSSCT00000042534, ENSSSCT00000050100, ENSSSCT00000054357, XM_005659920, XM_005659921, XM_005659923, XM_005659924, XM_005659925, XM_013993374, XM_013993375, XM_021101162, XM_021101164	1:175198145-175274636:+1	TOG array regulator of axonemal microtubules 1	Cluster0001
TOP2B	ENSSSCG00000011213	ENSSSCT00000012279	13:12508063-12575042:-1	DNA topoisomerase II beta	Cluster0001
TOPAZ1	ENSSSCG00000029268	ENSSSCT00000022484, XM_021071723	13:27574879-27643934:+1	testis and ovary specific PAZ domain containing 1	Cluster0001
TOPORS	ENSSSCG00000011004	ENSSSCT00000012046, ENSSSCT00000038964, XM_005668076, XM_013980194	10:33866433-33879141:+1	TOP1 binding arginine/serine rich protein	Cluster0001
TPR	ENSSSCG00000015576	ENSSSCT00000016969, ENSSSCT00000056338, XM_013977898, XM_021063816	9:127481827-127540790:-1	translocated promoter region, nuclear basket protein	Cluster0001
TRAF6	ENSSSCG00000038082	ENSSSCT00000038108, XM_013990069	2:24602811-24628262:+1	TNF receptor associated factor 6	Cluster0001
TRAPPC11	ENSSSCG00000015777	ENSSSCT00000017178, ENSSSCT00000043231, ENSSSCT00000058860, XM_003133337, XM_021074796, XM_021074797	15:44989215-45044034:+1	trafficking protein particle complex 11	Cluster0001
TRAPPC8	ENSSSCG00000003728	ENSSSCT00000004127, ENSSSCT00000004128, ENSSSCT00000042677, ENSSSCT00000065819, XM_021096211, XM_021096212	6:115694899-115787035:-1	trafficking protein particle complex 8	Cluster0001
TRAV3	ENSSSCG00000032592	ENSSSCT00000038358, ENSSSCT00000040560	7:77481930-77487706:-1	T cell receptor alpha variable 3 (gene/pseudogene)	Cluster0001
TRAV6	ENSSSCG00000036635	ENSSSCT00000038066	7:77445856-77447335:-1	T cell receptor alpha variable 6	Cluster0001
TRDMT1	ENSSSCG00000021309	ENSSSCT00000030385, XM_021063975	10:43434460-43493778:-1	tRNA aspartic acid methyltransferase 1	Cluster0001
TRIM23	ENSSSCG00000016948	ENSSSCT00000018456, ENSSSCT00000033510, ENSSSCT00000052745, XM_003134013, XM_003359790, XM_013984818, XM_021076780, XM_021076781	16:44103172-44146296:-1	tripartite motif containing 23	Cluster0001
TRIM33	ENSSSCG00000006757	ENSSSCT00000007402, ENSSSCT00000022292, ENSSSCT00000029002, XM_021090006, XM_021090007, XM_021090008	4:106058103-106191800:+1	tripartite motif containing 33	Cluster0001
TRIM44	ENSSSCG00000013295	ENSSSCT00000014520, ENSSSCT00000045333, XM_003122865, XM_005660994	2:25272622-25378733:-1	tripartite motif containing 44	Cluster0001
TRIO	ENSSSCG00000016781	ENSSSCT00000018268, XM_021077141, XM_021077142, XM_021077143	16:3563660-3919737:+1	trio Rho guanine nucleotide exchange factor	Cluster0001
TRIP11	ENSSSCG00000002445	ENSSSCT00000002715, ENSSSCT00000038260, ENSSSCT00000044128, ENSSSCT00000056353, XM_021099622	7:113525678-113600581:-1	thyroid hormone receptor interactor 11	Cluster0001
TRIP12	ENSSSCG00000024373	ENSSSCT00000029290, ENSSSCT00000037680, ENSSSCT00000037953, ENSSSCT00000038752, ENSSSCT00000041440, ENSSSCT00000051734, ENSSSCT00000057657, ENSSSCT00000059340, ENSSSCT00000060169, XM_021075057, XM_021075058, XM_021075059, XM_021075060, XM_021075061, XM_021075062, XM_021075063, XM_021075066, XM_021075067, XM_021075068, XM_021075069, XM_021075070, XM_021075071, XM_021075072, XM_021075073, XM_021075…	15:130787843-130939825:-1	thyroid hormone receptor interactor 12	Cluster0001
TRIQK	ENSSSCG00000037733	ENSSSCT00000056844, ENSSSCT00000064247, XM_021089114, XM_021089115, XM_021089116, XM_021089117, XM_021089118, XM_021089119, XM_021089120, XM_021089121	4:43707843-43793341:+1	triple QxxK/R motif containing	Cluster0001
TRMO	ENSSSCG00000005370	ENSSSCT00000005910, ENSSSCT00000062895	1:239768203-239786932:-1	tRNA methyltransferase O	Cluster0001
TRMT10B	ENSSSCG00000005354	ENSSSCT00000005894, ENSSSCT00000044620, XM_001928975, XM_013993673, XM_021066232	1:238516042-238537149:+1	tRNA methyltransferase 10B	Cluster0001
TRMT10C	ENSSSCG00000011956	ENSSSCT00000013082, ENSSSCT00000040020, XM_005657119, XM_005657120, XM_005657121, XM_013990166, XM_021070506, XM_021070507, XM_021070508	13:157500348-157521693:-1	tRNA methyltransferase 10C, mitochondrial RNase P subunit	Cluster0001
TRMT11	ENSSSCG00000004220	ENSSSCT00000004665, ENSSSCT00000045517, ENSSSCT00000051154, ENSSSCT00000052828, XM_001928661, XM_013992581, XM_013992582, XM_013992583, XM_013992584, XM_013992585	1:36932458-37002371:-1	tRNA methyltransferase 11 homolog	Cluster0001
TRMT13	ENSSSCG00000006869	ENSSSCT00000007522, ENSSSCT00000057662	4:117961116-117985870:-1	tRNA methyltransferase 13 homolog	Cluster0001
TRMT1L	ENSSSCG00000021393	ENSSSCT00000029214, ENSSSCT00000049159, XM_021102636	9:126302340-126392551:-1	tRNA methyltransferase 1 like	Cluster0001
TRMT5	ENSSSCG00000024529	ENSSSCT00000027040, ENSSSCT00000058749, XM_013993474	1:189914786-189923194:-1	tRNA methyltransferase 5	Cluster0001
TRPC1	ENSSSCG00000011681	ENSSSCT00000012789, ENSSSCT00000040029, ENSSSCT00000050805, ENSSSCT00000051266, ENSSSCT00000056922, ENSSSCT00000064199, XM_021068257, XM_021068259, XM_021068260	13:83436021-83498422:+1	transient receptor potential cation channel subfamily C member 1	Cluster0001
TRPM7	ENSSSCG00000004636	ENSSSCT00000005121, ENSSSCT00000050675, ENSSSCT00000055327, ENSSSCT00000059656, ENSSSCT00000064891, XM_003121515, XM_013993003, XM_021095609	1:121145857-121250211:+1	transient receptor potential cation channel subfamily M member 7	Cluster0001
TRPS1	ENSSSCG00000006018	ENSSSCT00000006604, ENSSSCT00000022591, ENSSSCT00000025325, ENSSSCT00000034476, ENSSSCT00000041790, ENSSSCT00000054515, ENSSSCT00000055503, XM_021088993, XM_021088996, XM_021088997, XM_021088998, XM_021088999, XM_021089000, XM_021089001, XM_021089002, XM_021089006, XM_021089007	4:22910553-23159822:+1	transcriptional repressor GATA binding 1	Cluster0001
TRUB1	ENSSSCG00000010653	ENSSSCT00000011652, ENSSSCT00000041459, ENSSSCT00000066250, XM_001929396, XM_013983770, XM_013983771, XM_021073386	14:125262109-125315467:+1	TruB pseudouridine synthase family member 1	Cluster0001
TSHR	ENSSSCG00000031771	ENSSSCT00000037791, ENSSSCT00000038969, ENSSSCT00000054379, ENSSSCT00000058429, ENSSSCT00000059307, ENSSSCT00000061359, XM_021098308	7:103768260-103926287:+1	thyroid stimulating hormone receptor	Cluster0001
TSNAX	ENSSSCG00000010171	ENSSSCT00000011137, ENSSSCT00000056392, ENSSSCT00000056849	14:59025174-59058287:-1	translin associated factor X	Cluster0001
TSPAN19	ENSSSCG00000040399	ENSSSCT00000062504, ENSSSCT00000064277	5:96993171-97021848:+1	tetraspanin 19	Cluster0001
TSPO2	ENSSSCG00000038553	ENSSSCT00000045945, XM_021098666, XM_021098667	7:36346547-36355300:+1	translocator protein 2	Cluster0001
TTC13	ENSSSCG00000010180	ENSSSCT00000011146, ENSSSCT00000040508, ENSSSCT00000041953, ENSSSCT00000042973, ENSSSCT00000048649, ENSSSCT00000049003, ENSSSCT00000051301, ENSSSCT00000058902, XM_001926644, XM_005652418, XM_005652419, XM_013993736, XM_013993802, XM_013993824, XM_021073608	14:59409123-59491962:+1	tetratricopeptide repeat domain 13	Cluster0001
TTC14	ENSSSCG00000011767	ENSSSCT00000012878, ENSSSCT00000060925, XM_001927185, XM_013982230	13:118614387-118625221:+1	tetratricopeptide repeat domain 14	Cluster0001
TTC21B	ENSSSCG00000015908	ENSSSCT00000017321, ENSSSCT00000017322, ENSSSCT00000030496, ENSSSCT00000038484, ENSSSCT00000049996, ENSSSCT00000052558, ENSSSCT00000059662, XM_021074791	15:72430726-72512852:-1	tetratricopeptide repeat domain 21B	Cluster0001
TTC26	ENSSSCG00000016511	ENSSSCT00000017977, ENSSSCT00000037886, ENSSSCT00000057927, ENSSSCT00000058067, XM_003134620	18:10462669-10509567:-1	tetratricopeptide repeat domain 26	Cluster0001
TTC33	ENSSSCG00000034966	ENSSSCT00000047662, ENSSSCT00000060463, XM_021076656, XM_021076657	16:25695939-25741945:-1	tetratricopeptide repeat domain 33	Cluster0001
TTL	ENSSSCG00000008097	ENSSSCT00000008870, ENSSSCT00000044871	3:43977111-44022635:-1	tubulin tyrosine ligase	Cluster0001
TUBGCP4	ENSSSCG00000004708	ENSSSCT00000005200, ENSSSCT00000052259, XM_001926011, XM_021096979	1:128029406-128084044:-1	tubulin gamma complex associated protein 4	Cluster0001
TUT4	ENSSSCG00000003859	ENSSSCT00000004271, ENSSSCT00000029203, ENSSSCT00000036893, ENSSSCT00000043569, ENSSSCT00000044168, ENSSSCT00000049536, ENSSSCT00000059634	6:159655629-159792599:+1	terminal uridylyl transferase 4	Cluster0001
TXNDC16	ENSSSCG00000035934	ENSSSCT00000045130, ENSSSCT00000052025, ENSSSCT00000054153, ENSSSCT00000057472, XM_021101990, XM_021101991, XM_021101992, XM_021102000, XM_021102004, XM_021102006	1:182101620-182204311:-1	thioredoxin domain containing 16	Cluster0001
U2SURP	ENSSSCG00000011684	ENSSSCT00000012792, ENSSSCT00000051826, ENSSSCT00000055076, XM_013982107, XM_013982108, XM_021069579, XM_021069580, XM_021069582, XM_021069583, XM_021069584, XM_021069585	13:83704576-83759969:+1	U2 snRNP associated SURP domain containing	Cluster0001
UBE2Q2	.	XM_021099009, XM_021099010	.	ubiquitin conjugating enzyme E2 Q2	Cluster0001
UBE2W	ENSSSCG00000006177	ENSSSCT00000006771, ENSSSCT00000039705, ENSSSCT00000053891, ENSSSCT00000055188	4:62014257-62098400:+1	ubiquitin conjugating enzyme E2 W	Cluster0001
UBE4A	ENSSSCG00000015095	ENSSSCT00000016461	9:45661090-45714514:+1	ubiquitination factor E4A	Cluster0001
UBLCP1	ENSSSCG00000017042	ENSSSCT00000018555, ENSSSCT00000050578, XM_003134100, XM_005672578	16:64178941-64205675:-1	ubiquitin like domain containing CTD phosphatase 1	Cluster0001
UBN2	ENSSSCG00000016510	ENSSSCT00000017975, ENSSSCT00000052833, ENSSSCT00000053236, ENSSSCT00000062255, XM_003360116, XM_013990786, XM_021079092	18:10381234-10451978:-1	ubinuclein 2	Cluster0001
UBR1	ENSSSCG00000004717	ENSSSCT00000005209, ENSSSCT00000032277, ENSSSCT00000046627, XM_021097091, XM_021097096, XM_021097103	1:128319311-128474302:+1	ubiquitin protein ligase E3 component n-recognin 1	Cluster0001
UBR2	ENSSSCG00000001641	ENSSSCT00000001825, ENSSSCT00000037445, ENSSSCT00000037458, ENSSSCT00000043593, ENSSSCT00000047658, ENSSSCT00000062002, XM_021098701, XM_021098702, XM_021098703	7:37655733-37784353:+1	ubiquitin protein ligase E3 component n-recognin 2	Cluster0001
UBR5	ENSSSCG00000022479	ENSSSCT00000022974, ENSSSCT00000023965, ENSSSCT00000033532, ENSSSCT00000035758, ENSSSCT00000064677, XM_021089030, XM_021089031, XM_021089032, XM_021089033, XM_021089034, XM_021089035, XM_021089036, XM_021089037, XM_021089038, XM_021089039	4:34645809-34794338:+1	ubiquitin protein ligase E3 component n-recognin 5	Cluster0001
UBXN2A	ENSSSCG00000033753	ENSSSCT00000050261	3:114673035-114714174:-1	UBX domain protein 2A	Cluster0001
UEVLD	ENSSSCG00000013362	ENSSSCT00000014593, ENSSSCT00000046159, XM_013994493, XM_021083261, XM_021083262	2:40617172-40673369:+1	UEV and lactate/malate dehyrogenase domains	Cluster0001
UFL1	ENSSSCG00000004339	ENSSSCT00000004795, ENSSSCT00000028080, ENSSSCT00000048009	1:63638525-63700975:+1	UFM1 specific ligase 1	Cluster0001
UGCG	ENSSSCG00000022780	ENSSSCT00000024726, ENSSSCT00000045204, XM_001925267, XM_021067532	1:252652194-252691024:+1	UDP-glucose ceramide glucosyltransferase	Cluster0001
UHRF1BP1L	ENSSSCG00000026697	ENSSSCT00000028017, ENSSSCT00000038630, ENSSSCT00000046579, ENSSSCT00000059466, ENSSSCT00000059790, ENSSSCT00000062521, XM_003126693, XM_021092726	5:83935699-84041752:+1	UHRF1 binding protein 1 like	Cluster0001
UMAD1	ENSSSCG00000036169	ENSSSCT00000040562, XM_021102419, XM_021102420, XM_021102421	9:77915042-78136249:+1	UBAP1-MVB12-associated (UMA) domain containing 1	Cluster0001
UPRT	ENSSSCG00000012425	ENSSSCT00000013586, ENSSSCT00000055659, XM_021079380	X:60426950-60448722:+1	uracil phosphoribosyltransferase homolog	Cluster0001
URI1	ENSSSCG00000025912	ENSSSCT00000026169	6:40043331-40110538:+1	URI1, prefoldin like chaperone	Cluster0001
USF3	ENSSSCG00000011918	ENSSSCT00000013042, XM_005670202, XM_013982422, XM_021068421	13:146230185-146282335:+1	upstream transcription factor family member 3	Cluster0001
USO1	ENSSSCG00000008971	ENSSSCT00000009826, ENSSSCT00000049903, ENSSSCT00000055573, ENSSSCT00000062382, XM_005666762	8:71363532-71451255:+1	USO1 vesicle transport factor	Cluster0001
USP15	ENSSSCG00000000457	ENSSSCT00000000493, ENSSSCT00000030942, XM_003126341, XM_003481646, XM_021091916, XM_021091917, XM_021091919, XM_021091920, XM_021091921, XM_021091922	5:26964788-27083336:+1	ubiquitin specific peptidase 15	Cluster0001
USP34	ENSSSCG00000008382	ENSSSCT00000009178, ENSSSCT00000028791, ENSSSCT00000039215, ENSSSCT00000044987, ENSSSCT00000051906, XM_013996121, XM_021087489, XM_021087490, XM_021087491, XM_021087492, XM_021087493, XM_021087495, XM_021087496, XM_021087497, XM_021087498, XM_021087499, XM_021087501	3:80331838-80587365:+1	ubiquitin specific peptidase 34	Cluster0001
USP37	ENSSSCG00000016194	ENSSSCT00000017635, ENSSSCT00000024409, ENSSSCT00000044371, ENSSSCT00000048145, ENSSSCT00000053346, XM_003133658, XM_005672197, XM_005672200, XM_013984488, XM_021076476	15:120492554-120590235:-1	ubiquitin specific peptidase 37	Cluster0001
USP4	ENSSSCG00000011382	ENSSSCT00000012460, ENSSSCT00000039768, ENSSSCT00000057843, ENSSSCT00000059156, XM_005669505, XM_013981641, XM_013981642, XM_013981644, XM_021068408, XM_021068409	13:31840300-31904384:-1	ubiquitin specific peptidase 4	Cluster0001
USP40	ENSSSCG00000016306	ENSSSCT00000017757, ENSSSCT00000017758, ENSSSCT00000017759, ENSSSCT00000024707, ENSSSCT00000028215, ENSSSCT00000042186, ENSSSCT00000060171, XM_021076204, XM_021076206, XM_021076207, XM_021076208, XM_021076209, XM_021076210	15:133870833-133952928:-1	ubiquitin specific peptidase 40	Cluster0001
USP6NL	ENSSSCG00000011120	ENSSSCT00000012170, ENSSSCT00000043013, ENSSSCT00000046062, ENSSSCT00000046564, ENSSSCT00000051909, ENSSSCT00000052464, ENSSSCT00000054011, ENSSSCT00000055282, XM_003130817, XM_013980314, XM_021064995, XM_021064996, XM_021064997	10:60193067-60396617:+1	USP6 N-terminal like	Cluster0001
USP8	ENSSSCG00000004639	ENSSSCT00000005124, ENSSSCT00000054894, ENSSSCT00000062423, XM_021095634, XM_021095641, XM_021095647, XM_021095657	1:121306032-121376122:-1	ubiquitin specific peptidase 8	Cluster0001
USP9X	ENSSSCG00000012251	ENSSSCT00000013397, ENSSSCT00000039814, ENSSSCT00000054956, ENSSSCT00000062541, XM_021080147, XM_021080148, XM_021080149, XM_021080150, XM_021080151, XM_021080152	X:36760774-36885294:+1	ubiquitin specific peptidase 9, X-linked	Cluster0001
USPL1	ENSSSCG00000028065	ENSSSCT00000027994, XM_021065545, XM_021065547, XM_021065548	11:7321187-7361569:+1	ubiquitin specific peptidase like 1	Cluster0001
UTP15	ENSSSCG00000014068	ENSSSCT00000015368, ENSSSCT00000040632	2:82715411-82734113:+1	UTP15, small subunit processome component	Cluster0001
UTP20	ENSSSCG00000000869	ENSSSCT00000000949	5:82813701-82913162:-1	UTP20, small subunit processome component	Cluster0001
VCPIP1	ENSSSCG00000006209	ENSSSCT00000006805, XM_003355045	4:68073271-68108130:+1	valosin containing protein interacting protein 1	Cluster0001
VIRMA	ENSSSCG00000006100	ENSSSCT00000006691, ENSSSCT00000045445, ENSSSCT00000065864	4:42162338-42237427:+1	vir like m6A methyltransferase associated	Cluster0001
VMAC	ENSSSCG00000031764	ENSSSCT00000059748	2:73123203-73130027:-1	vimentin type intermediate filament associated coiled-coil protein	Cluster0001
VPS13A	.	XM_021065108	.	vacuolar protein sorting 13 homolog A	Cluster0001
VPS13B	ENSSSCG00000006071	ENSSSCT00000006662, ENSSSCT00000045194, ENSSSCT00000053310, XM_021090606, XM_021090607, XM_021090611, XM_021090613, XM_021090614, XM_021090615	4:37091454-37819717:-1	vacuolar protein sorting 13 homolog B	Cluster0001
VPS13C	ENSSSCG00000036431	ENSSSCT00000053839, ENSSSCT00000061270, ENSSSCT00000062985, XM_021094362, XM_021094370, XM_021094373	1:109931251-110104257:+1	vacuolar protein sorting 13 homolog C	Cluster0001
VPS13D	ENSSSCG00000003438	ENSSSCT00000003816, ENSSSCT00000039196, ENSSSCT00000045404, ENSSSCT00000062913, ENSSSCT00000064371, XM_021095374, XM_021095375, XM_021095376, XM_021095377, XM_021095378, XM_021095380, XM_021095381	6:72256822-72510188:+1	vacuolar protein sorting 13 homolog D	Cluster0001
VPS35	ENSSSCG00000026239	ENSSSCT00000023228, ENSSSCT00000040826, XM_021094246	6:37944100-37977092:+1	VPS35, retromer complex component	Cluster0001
VPS53	ENSSSCG00000017812	ENSSSCT00000019386, ENSSSCT00000039738, ENSSSCT00000041195, ENSSSCT00000049947, ENSSSCT00000054724, ENSSSCT00000066402, XM_003131813, XM_021067534	12:47143707-47327667:+1	VPS53, GARP complex subunit	Cluster0001
VPS54	ENSSSCG00000027509	ENSSSCT00000029984, ENSSSCT00000054111, XM_021087459, XM_021087460, XM_021087462	3:77842484-77975436:+1	VPS54, GARP complex subunit	Cluster0001
VPS8	ENSSSCG00000011788	ENSSSCT00000012900, ENSSSCT00000024055, ENSSSCT00000041981, ENSSSCT00000050775, ENSSSCT00000058657, ENSSSCT00000064248, XM_021069973, XM_021069974, XM_021069975, XM_021069976, XM_021069977	13:122615226-122951656:+1	VPS8, CORVET complex subunit	Cluster0001
VSTM2B	ENSSSCG00000023921	ENSSSCT00000025639, ENSSSCT00000065343, XM_003355830, XM_005664465	6:39670680-39701764:+1	V-set and transmembrane domain containing 2B	Cluster0001
VTA1	ENSSSCG00000004140	ENSSSCT00000004575, ENSSSCT00000065783, XM_021087275, XM_021087276	1:22861450-22923980:-1	vesicle trafficking 1	Cluster0001
WAC	ENSSSCG00000011013	ENSSSCT00000012055, ENSSSCT00000024775, ENSSSCT00000049530, ENSSSCT00000063562, XM_003130704, XM_013980204, XM_013980206, XM_013980207	10:39932590-40024134:+1	WW domain containing adaptor with coiled-coil	Cluster0001
WAPL	ENSSSCG00000010357	ENSSSCT00000011339, ENSSSCT00000051558, ENSSSCT00000054933, XM_013990453, XM_021073751, XM_021073753	14:87492114-87588730:-1	WAPL cohesin release factor	Cluster0001
WASHC4	ENSSSCG00000000840	ENSSSCT00000000914, ENSSSCT00000031450, ENSSSCT00000052333, ENSSSCT00000056143, XM_021092625	5:79417712-79474645:-1	WASH complex subunit 4	Cluster0001
WDPCP	ENSSSCG00000032229	ENSSSCT00000052355, ENSSSCT00000066039, XM_021087464, XM_021087466, XM_021087467	3:78441093-78727940:+1	WD repeat containing planar cell polarity effector	Cluster0001
WDR33	ENSSSCG00000015861	ENSSSCT00000017272, ENSSSCT00000026043, ENSSSCT00000029060, XM_021075457, XM_021075458, XM_021075459, XM_021075461, XM_021075462	15:59520038-59758210:+1	WD repeat domain 33	Cluster0001
WDR35	ENSSSCG00000008604	ENSSSCT00000009415, ENSSSCT00000031965, ENSSSCT00000040514, ENSSSCT00000044182, ENSSSCT00000051533, XM_021087810	3:118208863-118277853:+1	WD repeat domain 35	Cluster0001
WDR36	ENSSSCG00000014199	ENSSSCT00000015514, ENSSSCT00000051417, ENSSSCT00000051665, ENSSSCT00000064278	2:115835104-115907635:+1	WD repeat domain 36	Cluster0001
WDR41	ENSSSCG00000014098	ENSSSCT00000015400, ENSSSCT00000047826, ENSSSCT00000064435, XM_013994928	2:86322955-86380571:-1	WD repeat domain 41	Cluster0001
WDR44	ENSSSCG00000035488	ENSSSCT00000053734, XM_021080420, XM_021080421	X:96950288-97027123:+1	WD repeat domain 44	Cluster0001
WDR48	ENSSSCG00000011261	ENSSSCT00000012329, ENSSSCT00000065490, XM_003132119, XM_013981475, XM_013981476	13:23735567-23786317:+1	WD repeat domain 48	Cluster0001
WDR5B	.	XM_005654047, XM_005654048	.	WD repeat domain 5B	Cluster0001
WDR75	ENSSSCG00000016036	ENSSSCT00000017461, XM_003133536, XM_021076080	15:93981049-94026707:+1	WD repeat domain 75	Cluster0001
WRN	ENSSSCG00000015840	ENSSSCT00000017248, ENSSSCT00000022344, ENSSSCT00000043230, ENSSSCT00000056627, ENSSSCT00000061430, XM_021075782, XM_021075783, XM_021075784, XM_021075785, XM_021075786, XM_021075787, XM_021075788, XM_021075789, XM_021075790, XM_021075791, XM_021075792	15:53966973-54094997:-1	Werner syndrome RecQ like helicase	Cluster0001
XPA	ENSSSCG00000005368	ENSSSCT00000005908, XM_003122025	1:239532272-239568649:-1	XPA, DNA damage recognition and repair factor	Cluster0001
XPO1	ENSSSCG00000028228	ENSSSCT00000031737, ENSSSCT00000038585, ENSSSCT00000048179, ENSSSCT00000049858, ENSSSCT00000057995, ENSSSCT00000065655, XM_013996110, XM_021087484, XM_021087485, XM_021087486, XM_021087487, XM_021087488	3:80254765-80302922:+1	exportin 1	Cluster0001
XPO4	ENSSSCG00000009276	ENSSSCT00000010159, ENSSSCT00000051789, XM_021065437, XM_021065438, XM_021065439, XM_021065440, XM_021065441, XM_021065442	11:1105047-1208182:-1	exportin 4	Cluster0001
XRCC4	.	XM_003123760, XM_003123761, XM_005661540, XM_013994963, XM_013994965, XM_013994966, XM_021085369, XM_021085370, XM_021085371	.	X-ray repair cross complementing 4	Cluster0001
XRN1	.	XM_005669915	.	5 -3 exoribonuclease 1	Cluster0001
XRN2	ENSSSCG00000007109	ENSSSCT00000007781, ENSSSCT00000059298, XM_005672749	17:29107756-29193020:+1	5 -3 exoribonuclease 2	Cluster0001
YAE1	ENSSSCG00000030497	ENSSSCT00000025505, ENSSSCT00000042615, ENSSSCT00000057509, ENSSSCT00000059136	18:54489417-54663245:-1	YAE1, ABCE1 maturation factor	Cluster0001
YAF2	ENSSSCG00000031775	ENSSSCT00000039411, ENSSSCT00000043238, XM_021092540, XM_021092541, XM_021092542, XM_021092543, XM_021092545, XM_021092547	5:73411030-73497180:-1	YY1 associated factor 2	Cluster0001
YEATS2	ENSSSCG00000011776	ENSSSCT00000012888, ENSSSCT00000043012, ENSSSCT00000044377, ENSSSCT00000046642, ENSSSCT00000050821, ENSSSCT00000055903, XM_003132559, XM_021069909, XM_021069910, XM_021069911, XM_021069912, XM_021069914, XM_021069916, XM_021069917, XM_021069919, XM_021069920, XM_021069922, XM_021069923, XM_021069924	13:121637804-121748886:+1	YEATS domain containing 2	Cluster0001
YIPF6	ENSSSCG00000028336	ENSSSCT00000014023, ENSSSCT00000030519, XM_005673699	X:54661817-54687983:+1	Yip1 domain family member 6	Cluster0001
YME1L1	ENSSSCG00000011066	ENSSSCT00000012110, ENSSSCT00000037234, ENSSSCT00000058945, ENSSSCT00000064510, XM_021064882, XM_021064883	10:48807571-48855233:-1	YME1 like 1 ATPase	Cluster0001
YTHDC2	ENSSSCG00000014211	ENSSSCT00000015529, ENSSSCT00000038889, ENSSSCT00000060020, XM_021084627, XM_021084628, XM_021084629	2:118003541-118092173:+1	YTH domain containing 2	Cluster0001
ZBED8	ENSSSCG00000038662	ENSSSCT00000058179	16:63142841-63144625:+1	zinc finger BED-type containing 8	Cluster0001
ZBTB1	ENSSSCG00000023724	ENSSSCT00000025336, ENSSSCT00000057464, XM_003482279, XM_005666307	7:88590931-88604300:+1	zinc finger and BTB domain containing 1	Cluster0001
ZBTB10	ENSSSCG00000006155	ENSSSCT00000006749, XM_001928277, XM_005663005	4:56138088-56174938:-1	zinc finger and BTB domain containing 10	Cluster0001
ZBTB11	ENSSSCG00000011953	ENSSSCT00000013079, ENSSSCT00000058856, XM_003132695, XM_021070501	13:157422018-157460212:+1	zinc finger and BTB domain containing 11	Cluster0001
ZBTB20	ENSSSCG00000026113	ENSSSCT00000023030, ENSSSCT00000040578, ENSSSCT00000041534, ENSSSCT00000047305, ENSSSCT00000049300, ENSSSCT00000050472, ENSSSCT00000057285, XM_021071294, XM_021071295, XM_021071300, XM_021071306	13:145364768-145648350:+1	zinc finger and BTB domain containing 20	Cluster0001
ZBTB25	ENSSSCG00000039616	ENSSSCT00000044505, ENSSSCT00000055723, XM_021099914, XM_021099916, XM_021099917, XM_021099918, XM_021099919, XM_021099920, XM_021099921, XM_021099922, XM_021099923, XM_021099924, XM_021099925	7:88553696-88575663:-1	zinc finger and BTB domain containing 25	Cluster0001
ZBTB26	ENSSSCG00000032575	ENSSSCT00000041069, ENSSSCT00000049597, XM_005660409, XM_005660412, XM_013993838, XM_013993839, XM_013993840, XM_013993841, XM_021068524	1:263831228-263846860:-1	zinc finger and BTB domain containing 26	Cluster0001
ZBTB37	ENSSSCG00000015494	ENSSSCT00000016878, ENSSSCT00000044452, ENSSSCT00000050920, XM_005656719, XM_005656720, XM_013989614, XM_021063656	9:116149235-116176677:+1	zinc finger and BTB domain containing 37	Cluster0001
ZBTB38	ENSSSCG00000022073	ENSSSCT00000025924, ENSSSCT00000041375, ENSSSCT00000049108, ENSSSCT00000049277, ENSSSCT00000060641, XM_005669895, XM_005669896, XM_005669897, XM_005669898, XM_013982074, XM_013982075, XM_013982078, XM_021068345, XM_021068346, XM_021068348, XM_021068349, XM_021068350, XM_021068351, XM_021068353, XM_021068354, XM_021068355, XM_021068356, XM_021068357, XM_021068358, XM_021068359	13:82064510-82195287:+1	zinc finger and BTB domain containing 38	Cluster0001
ZBTB6	ENSSSCG00000005576	ENSSSCT00000006129	1:263827304-263828578:-1	zinc finger and BTB domain containing 6	Cluster0001
ZBTB8A	ENSSSCG00000021457	ENSSSCT00000024432, ENSSSCT00000045330, ENSSSCT00000059382, XM_005665187	6:88922795-88960980:+1	zinc finger and BTB domain containing 8A	Cluster0001
ZBTB8OS	ENSSSCG00000029799	ENSSSCT00000026659, ENSSSCT00000051193, XM_005665186, XM_021095813, XM_021095814	6:88969761-88987492:-1	zinc finger and BTB domain containing 8 opposite strand	Cluster0001
ZC3H6	ENSSSCG00000008096	ENSSSCT00000008869, ENSSSCT00000041159, ENSSSCT00000063972, XM_021087025	3:44085333-44149461:-1	zinc finger CCCH-type containing 6	Cluster0001
ZC3H7A	ENSSSCG00000007895	ENSSSCT00000008651, ENSSSCT00000056905, ENSSSCT00000059885, ENSSSCT00000060257, ENSSSCT00000062475, XM_021086593, XM_021086594, XM_021086595, XM_021086596, XM_021086597, XM_021086598, XM_021086599	3:31335347-31376346:+1	zinc finger CCCH-type containing 7A	Cluster0001
ZC3H8	ENSSSCG00000008099	ENSSSCT00000008872, ENSSSCT00000046196, ENSSSCT00000063864, XM_005662275	3:44161271-44183383:+1	zinc finger CCCH-type containing 8	Cluster0001
ZCCHC11	.	XM_021096634, XM_021096635, XM_021096636, XM_021096637, XM_021096638, XM_021096639, XM_021096640, XM_021096641, XM_021096642, XM_021096643, XM_021096644, XM_021096645	.	zinc finger CCHC-type containing 11	Cluster0001
ZCCHC6	.	XM_003130637, XM_005656799, XM_013989708, XM_013989709, XM_013989710, XM_013989711, XM_021064628, XM_021064630, XM_021064631, XM_021064632	.	zinc finger CCHC-type containing 6	Cluster0001
ZCCHC7	ENSSSCG00000005346	ENSSSCT00000005885, ENSSSCT00000059045, ENSSSCT00000060025, XM_021066106, XM_021066112, XM_021066118	1:237820363-238069534:+1	zinc finger CCHC-type containing 7	Cluster0001
ZDHHC15	ENSSSCG00000012426	ENSSSCT00000013587, ENSSSCT00000039320, ENSSSCT00000056936, ENSSSCT00000059639, XM_021079754, XM_021079755	X:60393625-60585318:-1	zinc finger DHHC-type containing 15	Cluster0001
ZDHHC17	ENSSSCG00000000952	ENSSSCT00000001041, ENSSSCT00000042307, XM_021092815, XM_021092816	5:104300877-104395288:-1	zinc finger DHHC-type containing 17	Cluster0001
ZDHHC21	ENSSSCG00000035730	ENSSSCT00000051251, XM_021063627	1:207836573-207912546:+1	zinc finger DHHC-type containing 21	Cluster0001
ZFAND1	ENSSSCG00000024780	ENSSSCT00000025525, ENSSSCT00000057814	4:54908876-54931825:+1	zinc finger AN1-type containing 1	Cluster0001
ZFC3H1	ENSSSCG00000000509	ENSSSCT00000000547, ENSSSCT00000000548, ENSSSCT00000039112, ENSSSCT00000046824	5:35612726-35671191:-1	zinc finger C3H1-type containing	Cluster0001
ZFP1	ENSSSCG00000022668	ENSSSCT00000031098, XM_005664345, XM_013998178, XM_013998179, XM_013998180	6:12482182-12531529:-1	ZFP1 zinc finger protein	Cluster0001
ZFP14	ENSSSCG00000032673	ENSSSCT00000042274, ENSSSCT00000044492, ENSSSCT00000052379, XM_013998454, XM_013998455	6:45994478-46013418:+1	ZFP14 zinc finger protein	Cluster0001
ZFP28	ENSSSCG00000027774	ENSSSCT00000025504, ENSSSCT00000047182, ENSSSCT00000064869	6:60904998-60927200:-1	ZFP28 zinc finger protein	Cluster0001
ZFP30	ENSSSCG00000029408	ENSSSCT00000024936, ENSSSCT00000064239	6:46761193-46786246:-1	zinc finger protein 30 homolog	Cluster0001
ZFP62	ENSSSCG00000014539	ENSSSCT00000015889, ENSSSCT00000046738, XM_005652971, XM_013991854, XM_013991857, XM_013991861, XM_013991869, XM_013991870	2:57848414-57861972:+1	ZFP62 zinc finger protein	Cluster0001
ZFP69B	ENSSSCG00000003981	ENSSSCT00000004403, ENSSSCT00000004404, ENSSSCT00000039544, ENSSSCT00000040104, ENSSSCT00000040215, ENSSSCT00000046970, ENSSSCT00000050813, ENSSSCT00000061381	6:170657358-170701730:-1	zinc finger protein 643	Cluster0001
ZFP90	ENSSSCG00000032372	ENSSSCT00000039730, ENSSSCT00000056579, ENSSSCT00000065431, XM_021093882, XM_021093883, XM_021093884, XM_021093886	6:18312936-18335962:-1	ZFP90 zinc finger protein	Cluster0001
ZFR	ENSSSCG00000027681	ENSSSCT00000025090, ENSSSCT00000029135, ENSSSCT00000054181, ENSSSCT00000060047, XM_021076977, XM_021076978	16:18560280-18656346:-1	zinc finger RNA binding protein	Cluster0001
ZFYVE16	ENSSSCG00000014121	ENSSSCT00000015425, ENSSSCT00000024491, ENSSSCT00000027041, ENSSSCT00000027416	2:89045085-89107255:+1	zinc finger FYVE-type containing 16	Cluster0001
ZGRF1	ENSSSCG00000009120	ENSSSCT00000009987, ENSSSCT00000023614, ENSSSCT00000056210, ENSSSCT00000058304, XM_021101661, XM_021101662, XM_021101663, XM_021101664, XM_021101665, XM_021101666, XM_021101667, XM_021101668	8:110089893-110171741:+1	zinc finger GRF-type containing 1	Cluster0001
ZHX1	ENSSSCG00000005984	ENSSSCT00000006567, ENSSSCT00000037816, ENSSSCT00000046918, XM_001928633, XM_005662871, XM_013996503	4:16100782-16126672:+1	zinc fingers and homeoboxes 1	Cluster0001
ZKSCAN1	ENSSSCG00000031461	ENSSSCT00000054086, XM_005661886, XM_013995409, XM_021086186, XM_021086187, XM_021086188, XM_021086189, XM_021086190, XM_021086191	3:7920635-7942629:+1	zinc finger with KRAB and SCAN domains 1	Cluster0001
ZKSCAN8	ENSSSCG00000001201	ENSSSCT00000001299, ENSSSCT00000037299, ENSSSCT00000040919	7:21981150-22000834:+1	zinc finger with KRAB and SCAN domains 8	Cluster0001
ZMPSTE24	ENSSSCG00000027902	ENSSSCT00000025758, ENSSSCT00000036916, XM_021096012, XM_021096013	6:96008304-96057123:+1	zinc metallopeptidase STE24	Cluster0001
ZMYM1	ENSSSCG00000034292	ENSSSCT00000040523, ENSSSCT00000061141, ENSSSCT00000061235, XM_021095888, XM_021095889, XM_021095890, XM_021095891, XM_021095892, XM_021095893, XM_021095894, XM_021095895	6:91312167-91346281:+1	zinc finger MYM-type containing 1	Cluster0001
ZMYM2	ENSSSCG00000021814	ENSSSCT00000028293, ENSSSCT00000044485, ENSSSCT00000045548, ENSSSCT00000047482, XM_021065426, XM_021065427, XM_021065428	11:651805-731035:+1	zinc finger MYM-type containing 2	Cluster0001
ZMYM4	ENSSSCG00000003627	ENSSSCT00000004023, ENSSSCT00000053311, ENSSSCT00000058871, ENSSSCT00000060786, ENSSSCT00000061991, XM_021095899, XM_021095900, XM_021095901, XM_021095902, XM_021095903, XM_021095904, XM_021095905, XM_021095906, XM_021095907, XM_021095908, XM_021095909, XM_021095910	6:91455778-91623818:+1	zinc finger MYM-type containing 4	Cluster0001
ZMYM6	ENSSSCG00000034618	ENSSSCT00000038214, ENSSSCT00000060589, ENSSSCT00000060801, XM_021095873, XM_021095874, XM_021095875, XM_021095876, XM_021095878, XM_021095879, XM_021095880, XM_021095881, XM_021095882, XM_021095883, XM_021095884, XM_021095885	6:91237848-91294209:-1	zinc finger MYM-type containing 6	Cluster0001
ZNF12	ENSSSCG00000034517	ENSSSCT00000055615, XM_005653056	3:4454953-4472353:+1	zinc finger protein 12	Cluster0001
ZNF132	.	XM_013998916	.	zinc finger protein 132	Cluster0001
ZNF135	ENSSSCG00000021888	ENSSSCT00000031894, ENSSSCT00000036822, ENSSSCT00000037793, ENSSSCT00000039252, XM_021097360, XM_021097361, XM_021097363, XM_021097364, XM_021097366, XM_021097368, XM_021097369	6:62754117-62768886:+1	zinc finger protein 135	Cluster0001
ZNF143	ENSSSCG00000022070	ENSSSCT00000032233, XM_021062240, XM_021062241, XM_021062242, XM_021062243, XM_021062244, XM_021062246, XM_021062247	9:41974-104825:-1	zinc finger protein 143	Cluster0001
ZNF148	ENSSSCG00000011858	ENSSSCT00000012971, ENSSSCT00000049443, ENSSSCT00000051980, ENSSSCT00000053548, ENSSSCT00000060773, ENSSSCT00000063441, ENSSSCT00000064810, XM_013982364, XM_021070209, XM_021070210, XM_021070211, XM_021070212, XM_021070213, XM_021070214, XM_021070215, XM_021070216	13:134969668-135091568:+1	zinc finger protein 148	Cluster0001
ZNF169	ENSSSCG00000032834	ENSSSCT00000045315, ENSSSCT00000063648, XM_021087001, XM_021087002, XM_021087003, XM_021087005, XM_021087006, XM_021087007, XM_021087008, XM_021087009, XM_021087010, XM_021087011, XM_021087012, XM_021087013, XM_021087014, XM_021087015, XM_021087016, XM_021087017, XM_021087018, XM_021087019	3:43513397-43558613:+1	zinc finger protein 169	Cluster0001
ZNF175	ENSSSCG00000003233	ENSSSCT00000003592, XM_013995120	6:58408877-58417422:-1	zinc finger protein 175	Cluster0001
ZNF182	ENSSSCG00000012284	ENSSSCT00000013433, ENSSSCT00000050580, ENSSSCT00000061397, XM_013990882, XM_013990883, XM_013990884, XM_013990885, XM_021080396, XM_021080397	X:42443395-42473285:-1	zinc finger protein 182	Cluster0001
ZNF184	ENSSSCG00000001164	ENSSSCT00000001262, ENSSSCT00000024766, ENSSSCT00000055194, ENSSSCT00000055328, ENSSSCT00000055457, XM_013977499, XM_013977500, XM_021099794, XM_021099795, XM_021099796, XM_021099797, XM_021099798, XM_021099799, XM_021099800	7:21413117-21435873:-1	zinc finger protein 184	Cluster0001
ZNF189	ENSSSCG00000034239	ENSSSCT00000039074, ENSSSCT00000049810, XM_005652705	1:243106986-243118344:+1	zinc finger protein 189	Cluster0001
ZNF197	ENSSSCG00000011304	ENSSSCT00000012375, ENSSSCT00000056487, ENSSSCT00000063661, XM_003358389, XM_005669432, XM_005669433, XM_005669435, XM_005669436, XM_013981532, XM_013981536, XM_021071728, XM_021071730	13:27875474-27901238:+1	zinc finger protein 197	Cluster0001
ZNF2	ENSSSCG00000008117	ENSSSCT00000008892, ENSSSCT00000008893, ENSSSCT00000049906, XM_005658595, XM_013991837, XM_013991840, XM_021087077, XM_021087078, XM_021087079	3:46083351-46106435:-1	zinc finger protein 2	Cluster0001
ZNF236	ENSSSCG00000023533	ENSSSCT00000023890, ENSSSCT00000025136, ENSSSCT00000048749, XM_021099032, XM_021099035, XM_021099040, XM_021099045	1:147688520-147782141:-1	zinc finger protein 236	Cluster0001
ZNF24	ENSSSCG00000023276	ENSSSCT00000027716, ENSSSCT00000057538, ENSSSCT00000061057, ENSSSCT00000064718, XM_021093437, XM_021093438	6:119156492-119193356:-1	zinc finger protein 24	Cluster0001
ZNF248	ENSSSCG00000037204	ENSSSCT00000038529, ENSSSCT00000039669, ENSSSCT00000047718, ENSSSCT00000056250, ENSSSCT00000058851, ENSSSCT00000064753, XM_005670987, XM_021072373, XM_021072374, XM_021072376	14:61047835-61065950:+1	zinc finger protein 248	Cluster0001
ZNF25	ENSSSCG00000010196	ENSSSCT00000011162, ENSSSCT00000040744, XM_005670993, XM_021072377, XM_021072378	14:60938912-60968872:+1	zinc finger protein 25	Cluster0001
ZNF26	ENSSSCG00000009730	ENSSSCT00000010668	14:22593642-22608916:-1	zinc finger protein 84	Cluster0001
ZNF260	ENSSSCG00000002930	ENSSSCT00000003237, ENSSSCT00000045961, ENSSSCT00000064022, XM_013998468, XM_013998469, XM_013998470, XM_013998471, XM_013998472	6:45859484-45880709:+1	zinc finger protein 260	Cluster0001
ZNF268	ENSSSCG00000035148	ENSSSCT00000045013, ENSSSCT00000045920, ENSSSCT00000057692, ENSSSCT00000062641	14:22379611-22406493:+1	zinc finger protein 268	Cluster0001
ZNF274	ENSSSCG00000003998	ENSSSCT00000004421	6:62833219-62862906:+1	neurotrophin receptor-interacting factor homolog	Cluster0001
ZNF277	ENSSSCG00000025910	ENSSSCT00000026979, ENSSSCT00000043240, XM_005673239, XM_021079287	18:33310106-33423795:-1	zinc finger protein 277	Cluster0001
ZNF280C	ENSSSCG00000012659	ENSSSCT00000013840, ENSSSCT00000033263, ENSSSCT00000043182, ENSSSCT00000056024, XM_005673903, XM_005673904, XM_013986418, XM_021079649	X:106735077-106795731:-1	zinc finger protein 280C	Cluster0001
ZNF280D	.	XM_005659574, XM_005659575, XM_013992957, XM_013992958, XM_021094773, XM_021094785, XM_021094794	.	zinc finger protein 280D	Cluster0001
ZNF283	ENSSSCG00000003072	ENSSSCT00000003409, XM_013988663	6:50650505-50678027:+1	zinc finger protein 283	Cluster0001
ZNF287	ENSSSCG00000018031	ENSSSCT00000019626, XM_013980315	12:59038737-59052727:+1	zinc finger protein 287	Cluster0001
ZNF292	ENSSSCG00000035281	ENSSSCT00000041286, ENSSSCT00000045846, ENSSSCT00000065061, XM_021089731, XM_021089734, XM_021089737	1:55618002-55712943:+1	zinc finger protein 292	Cluster0001
ZNF304	ENSSSCG00000034301	ENSSSCT00000048095, ENSSSCT00000062249, XM_021097291, XM_021097292, XM_021097293	6:61723697-61752520:+1	zinc finger protein 304	Cluster0001
ZNF317	ENSSSCG00000032506	ENSSSCT00000045988, ENSSSCT00000052663, XM_013990499, XM_013990500	2:67312164-67336319:+1	zinc finger protein 317	Cluster0001
ZNF322	ENSSSCG00000001156	ENSSSCT00000001254, ENSSSCT00000039473, XM_021099812, XM_021099813	7:21127869-21143387:-1	zinc finger protein 322	Cluster0001
ZNF331	ENSSSCG00000031793	ENSSSCT00000036826, ENSSSCT00000058208, ENSSSCT00000059412, ENSSSCT00000063790, XM_021097271, XM_021097273	6:56594917-56611353:-1	zinc finger protein 331	Cluster0001
ZNF333	ENSSSCG00000013786	ENSSSCT00000015063, ENSSSCT00000049284, XM_005654876, XM_005654878, XM_013987447, XM_013987448, XM_021083686, XM_021083687	2:64587860-64607784:-1	zinc finger protein 333	Cluster0001
ZNF35	ENSSSCG00000032080	ENSSSCT00000042762, XM_021071741, XM_021071742, XM_021071743	13:27897518-27917788:+1	zinc finger protein 35	Cluster0001
ZNF350	ENSSSCG00000027056	ENSSSCT00000024905, ENSSSCT00000036790, ENSSSCT00000039904	6:58039679-58085781:-1	zinc finger protein 350	Cluster0001
ZNF37A	.	XM_005670986, XM_013983244, XM_013983245, XM_021072371, XM_021072372	.	zinc finger protein 37A	Cluster0001
ZNF383	ENSSSCG00000021946	ENSSSCT00000003249, ENSSSCT00000022792, ENSSSCT00000037837, ENSSSCT00000043410, ENSSSCT00000055342, ENSSSCT00000055594, ENSSSCT00000057244, ENSSSCT00000057579, XM_013998484, XM_021097184, XM_021097185, XM_021097186	6:46121774-46284605:+1	zinc finger protein 383	Cluster0001
ZNF404	ENSSSCG00000003071	ENSSSCT00000003408	6:50698321-50721479:-1	zinc finger protein 404	Cluster0001
ZNF407	ENSSSCG00000033971	ENSSSCT00000038557, ENSSSCT00000046040, XM_021073786, XM_021073791	1:149090512-149517284:-1	zinc finger protein 407	Cluster0001
ZNF41	ENSSSCG00000039997	ENSSSCT00000039230, ENSSSCT00000041437, ENSSSCT00000046814, ENSSSCT00000051937, XM_021080384	X:41934977-41984711:-1	zinc finger protein 41	Cluster0001
ZNF445	ENSSSCG00000024556	ENSSSCT00000031378, ENSSSCT00000053242, ENSSSCT00000056173, ENSSSCT00000059863, XM_003358387, XM_005657067, XM_021071725, XM_021071726	13:27748438-27783513:-1	zinc finger protein 445	Cluster0001
ZNF45	ENSSSCG00000003070	ENSSSCT00000003407, ENSSSCT00000060898, XM_021094489, XM_021094490, XM_021094491, XM_021094492, XM_021094493, XM_021094494, XM_021094495, XM_021094497, XM_021094498, XM_021094499	6:50733138-50759459:+1	zinc finger protein 45	Cluster0001
ZNF454	ENSSSCG00000027351	ENSSSCT00000030072, ENSSSCT00000051858	2:79492281-79515681:-1	zinc finger protein 454	Cluster0001
ZNF461	ENSSSCG00000029875	ENSSSCT00000003258, ENSSSCT00000040041, ENSSSCT00000045305, ENSSSCT00000063106, ENSSSCT00000065342	6:45743982-45833592:+1	zinc finger protein 461	Cluster0001
ZNF470	ENSSSCG00000039914	ENSSSCT00000054397, ENSSSCT00000063301, XM_005664902, XM_005664903, XM_005664904, XM_013998860, XM_013998861, XM_021095089	6:60890688-60900884:-1	zinc finger protein 470	Cluster0001
ZNF471	ENSSSCG00000003324	ENSSSCT00000003690, ENSSSCT00000047187, ENSSSCT00000052179, ENSSSCT00000057001	6:60784524-60804616:+1	zinc finger protein 471	Cluster0001
ZNF507	ENSSSCG00000025139	ENSSSCT00000024594, ENSSSCT00000038392, ENSSSCT00000059591, ENSSSCT00000065936, XM_021094261, XM_021094263	6:42273848-42335234:+1	zinc finger protein 507	Cluster0001
ZNF512	ENSSSCG00000008545	ENSSSCT00000009350, ENSSSCT00000042327, ENSSSCT00000053321, ENSSSCT00000056567, XM_005653048, XM_021087678	3:111572424-111605885:-1	zinc finger protein 512	Cluster0001
ZNF518A	ENSSSCG00000010503	ENSSSCT00000011492, XM_013983631, XM_013983632, XM_013983634, XM_013983635, XM_013983636, XM_013983637, XM_013983638, XM_013983640, XM_021074255, XM_021074256, XM_021074257, XM_021074258, XM_021074259, XM_021074261	14:107611957-107619768:+1	zinc finger protein 518A	Cluster0001
ZNF527	ENSSSCG00000021741	ENSSSCT00000026545, ENSSSCT00000047576, ENSSSCT00000049264, ENSSSCT00000055379, ENSSSCT00000064324, XM_013998437, XM_013998439, XM_013998440, XM_021097233	6:46291605-46328230:+1	zinc finger protein 527	Cluster0001
ZNF546	ENSSSCG00000002988	ENSSSCT00000003319, ENSSSCT00000043489, ENSSSCT00000059258, ENSSSCT00000059411	6:48418756-48430858:+1	zinc finger protein 546	Cluster0001
ZNF565	ENSSSCG00000002931	ENSSSCT00000003238, ENSSSCT00000039125, ENSSSCT00000048166, XM_013998372, XM_021097172	6:45543133-45577294:-1	zinc finger protein 565	Cluster0001
ZNF567	ENSSSCG00000002932	ENSSSCT00000003245, XM_013998427, XM_021097127, XM_021097128, XM_021097129, XM_021097130	6:45709662-45737832:-1	zinc finger protein 567	Cluster0001
ZNF569	ENSSSCG00000029420	ENSSSCT00000003257	6:46377296-46425611:-1	zinc finger protein 569	Cluster0001
ZNF570	ENSSSCG00000031612	ENSSSCT00000051747, ENSSSCT00000063716, XM_013998447, XM_013998448, XM_013998449, XM_013998450	6:46442781-46468684:+1	zinc finger protein 570	Cluster0001
ZNF572	ENSSSCG00000005971	ENSSSCT00000006554, XM_021088933	4:14719854-14722269:-1	zinc finger protein 572	Cluster0001
ZNF606	ENSSSCG00000003995	ENSSSCT00000004418, ENSSSCT00000057242, ENSSSCT00000061223	6:62695608-62739701:-1	zinc finger protein 606	Cluster0001
ZNF613	ENSSSCG00000032585	ENSSSCT00000056801, ENSSSCT00000060733, ENSSSCT00000064778	6:58166101-58217654:-1	zinc finger protein 613	Cluster0001
ZNF614	ENSSSCG00000003241	ENSSSCT00000003600, ENSSSCT00000038166, XM_021097258	6:58102159-58134942:-1	zinc finger protein 614	Cluster0001
ZNF624	ENSSSCG00000025254	ENSSSCT00000029252, ENSSSCT00000039119, ENSSSCT00000047172, ENSSSCT00000049345, XM_005653995, XM_021067911	12:58986547-59007697:+1	zinc finger protein 624	Cluster0001
ZNF638	ENSSSCG00000022708	ENSSSCT00000026994, ENSSSCT00000027413, ENSSSCT00000041940, ENSSSCT00000047685, ENSSSCT00000054625, ENSSSCT00000062246, XM_005662475, XM_005662477, XM_013996059, XM_013996060, XM_021087382, XM_021087383, XM_021087384, XM_021087386, XM_021087387, XM_021087388, XM_021087389	3:71284025-71424234:-1	zinc finger protein 638	Cluster0001
ZNF644	ENSSSCG00000022534	ENSSSCT00000007571, ENSSSCT00000031349, ENSSSCT00000038524, ENSSSCT00000043089, ENSSSCT00000047668, ENSSSCT00000052759, ENSSSCT00000061126, ENSSSCT00000062073, XM_013997393, XM_021090261, XM_021090262, XM_021090263, XM_021090264, XM_021090265, XM_021090266, XM_021090267, XM_021090268, XM_021090269, XM_021090270, XM_021090271, XM_021090272, XM_021090273, XM_021090275, XM_021090276, XM_021090277, X…	4:125740329-125857196:+1	zinc finger protein 644	Cluster0001
ZNF654	ENSSSCG00000036885	ENSSSCT00000045660, ENSSSCT00000054967, XM_021070739, XM_021070740, XM_021070741, XM_021070742, XM_021070743, XM_021070745, XM_021070746, XM_021070747	13:167807050-167895769:-1	zinc finger protein 654	Cluster0001
ZNF658	ENSSSCG00000036693	ENSSSCT00000050983, ENSSSCT00000060376, XM_021064707	10:38797315-38818862:-1	zinc finger protein 658	Cluster0001
ZNF662	ENSSSCG00000011292	ENSSSCT00000012362, XM_005669423, XM_005669424, XM_013981526, XM_013981527, XM_021071712	13:26343815-26350626:+1	zinc finger protein 662	Cluster0001
ZNF684	ENSSSCG00000003979	ENSSSCT00000004401, ENSSSCT00000064049	6:170622180-170657024:-1	zinc finger protein 684	Cluster0001
ZNF70	ENSSSCG00000010076	ENSSSCT00000011037, ENSSSCT00000061554, XM_001926805, XM_013983166	14:49928357-49935617:+1	zinc finger protein 70	Cluster0001
ZNF74	ENSSSCG00000036280	ENSSSCT00000045835, ENSSSCT00000054360, XM_021073672	14:50836906-50883438:-1	zinc finger protein 74	Cluster0001
ZNF770	ENSSSCG00000004799	ENSSSCT00000005298, XM_003121632, XM_013993206, XM_013993207, XM_021098147, XM_021098156	1:136122720-136129840:+1	zinc finger protein 770	Cluster0001
ZNF782	ENSSSCG00000011167	ENSSSCT00000012229, ENSSSCT00000047298, ENSSSCT00000062281, ENSSSCT00000065357, XM_021064572, XM_021064573	10:25283932-25341575:+1	zinc finger protein 782	Cluster0001
ZNF793	ENSSSCG00000033611	ENSSSCT00000044146, ENSSSCT00000064074	6:46170579-46192399:-1	zinc finger protein 793	Cluster0001
ZNF800	ENSSSCG00000024157	ENSSSCT00000025503, ENSSSCT00000030524, ENSSSCT00000050138, ENSSSCT00000057018, ENSSSCT00000058606, ENSSSCT00000066345, XM_021079288, XM_021079289	18:20834506-20888091:+1	zinc finger protein 800	Cluster0001
ZNF81	ENSSSCG00000012283	ENSSSCT00000013432, XM_021080394, XM_021080395	X:42277048-42363521:+1	zinc finger protein 81	Cluster0001
ZNF891	ENSSSCG00000037951	ENSSSCT00000041945	14:22502746-22521194:+1	zinc finger protein 891	Cluster0001
ZRANB2	ENSSSCG00000003787	ENSSSCT00000004190, XM_013988867	6:141927468-141947765:+1	zinc finger RANBP2-type containing 2	Cluster0001
ZSCAN12	ENSSSCG00000001209	ENSSSCT00000001307, XM_013977533, XM_013977534, XM_021099801, XM_021099802, XM_021099803, XM_021099804	7:22189821-22208745:-1	zinc finger and SCAN domain containing 12	Cluster0001
ZSCAN16	ENSSSCG00000022664	ENSSSCT00000025146, ENSSSCT00000040377, XM_013977531	7:21950389-21965593:+1	zinc finger and SCAN domain containing 16	Cluster0001
ZSCAN23	ENSSSCG00000037512	ENSSSCT00000061198, XM_005665675, XM_013977537, XM_013977539, XM_021099816	7:22224212-22229204:-1	zinc finger and SCAN domain containing 23	Cluster0001
ZSCAN31	ENSSSCG00000025335	ENSSSCT00000024140, XM_013977535	7:22173468-22181176:-1	zinc finger and SCAN domain containing 31	Cluster0001
ZSWIM6	ENSSSCG00000025194	ENSSSCT00000030260, XM_021076973	16:40105426-40305375:+1	zinc finger SWIM-type containing 6	Cluster0001
ZUP1	ENSSSCG00000004263	ENSSSCT00000004712, ENSSSCT00000025750, ENSSSCT00000061721	1:44939894-44962730:+1	zinc finger containing ubiquitin peptidase 1	Cluster0001
ZZZ3	.	XM_005653415, XM_013996145, XM_013996149, XM_013996150, XM_013996152, XM_021096454, XM_021096455, XM_021096456, XM_021096457, XM_021096458	.	zinc finger ZZ-type containing 3	Cluster0001
AAR2	ENSSSCG00000007315	ENSSSCT00000008004, XM_001926938, XM_005672908, XM_005672909, XM_013985342, XM_013985343, XM_021077487	17:39498710-39522518:+1	AAR2 splicing factor homolog	Cluster0002
AARS2	ENSSSCG00000001706	ENSSSCT00000001906, ENSSSCT00000041366, ENSSSCT00000063672, XM_001929593	7:39299460-39313778:-1	alanyl-tRNA synthetase 2, mitochondrial	Cluster0002
ABCB8	ENSSSCG00000027986	ENSSSCT00000024743, XM_013990736	18:6178553-6196959:-1	ATP binding cassette subfamily B member 8	Cluster0002
ABCC10	ENSSSCG00000001680	ENSSSCT00000001875, ENSSSCT00000038932, ENSSSCT00000042205, ENSSSCT00000047503, ENSSSCT00000065759, XM_021098753, XM_021098754	7:38432732-38452691:+1	ATP binding cassette subfamily C member 10	Cluster0002
ABCF1	ENSSSCG00000001346	ENSSSCT00000001462, ENSSSCT00000035204, XM_005653453	7:23126307-23143994:+1	ATP binding cassette subfamily F member 1	Cluster0002
ABHD14A	ENSSSCG00000030229	ENSSSCT00000026406, ENSSSCT00000040942, ENSSSCT00000044844, XM_005669556, XM_005669557, XM_005669558, XM_021068477, XM_021068478, XM_021068479, XM_021068481, XM_021068482, XM_021068483, XM_021068484, XM_021068485, XM_021068486, XM_021068487	13:34104411-34112723:+1	abhydrolase domain containing 14A	Cluster0002
ABHD16A	ENSSSCG00000034923	ENSSSCT00000047968, XM_021098060	7:23799337-23824299:-1	abhydrolase domain containing 16A	Cluster0002
ABHD17A	ENSSSCG00000013442	ENSSSCT00000014686, ENSSSCT00000059941, XM_003122999	2:76658068-76666559:+1	abhydrolase domain containing 17A	Cluster0002
ABL1	ENSSSCG00000005706	ENSSSCT00000006275, ENSSSCT00000039018, ENSSSCT00000054304, XM_005660524, XM_005660525, XM_005660526	1:270761674-270906709:+1	ABL proto-oncogene 1, non-receptor tyrosine kinase	Cluster0002
ABT1	ENSSSCG00000038191	ENSSSCT00000052336, XM_001926306	7:21024603-21031093:+1	activator of basal transcription 1	Cluster0002
ABTB1	ENSSSCG00000024827	ENSSSCT00000023623, ENSSSCT00000058290, XM_005669821, XM_005669823, XM_005669824, XM_013982019, XM_021069446, XM_021069448, XM_021069449	13:72573335-72579197:-1	ankyrin repeat and BTB domain containing 1	Cluster0002
ACD	ENSSSCG00000029590	ENSSSCT00000027655, ENSSSCT00000055555, XM_021094092, XM_021094094	6:28277614-28280405:-1	ACD, shelterin complex subunit and telomerase recruitment factor	Cluster0002
ACOT8	ENSSSCG00000007426	ENSSSCT00000025270, XM_001928889	17:48038561-48054209:-1	acyl-CoA thioesterase 8	Cluster0002
ACOX3	ENSSSCG00000008724	ENSSSCT00000009544, ENSSSCT00000046718, ENSSSCT00000063782, XM_021100951, XM_021100952, XM_021100953	8:2716923-2757262:+1	acyl-CoA oxidase 3, pristanoyl	Cluster0002
ACTR1B	ENSSSCG00000008194	ENSSSCT00000008973, XM_021087260	3:56610540-56619171:+1	ARP1 actin related protein 1 homolog B	Cluster0002
ACTR5	ENSSSCG00000007349	ENSSSCT00000008041, XM_021077707	17:41702273-41724377:+1	ARP5 actin related protein 5 homolog	Cluster0002
ADCK2	ENSSSCG00000016496	ENSSSCT00000017960, ENSSSCT00000028640, ENSSSCT00000049683, XM_005654271, XM_021078591	18:9153839-9173007:-1	aarF domain containing kinase 2	Cluster0002
ADCK5	ENSSSCG00000005907	ENSSSCT00000006487, XM_005662813, XM_013996404, XM_021090463, XM_021090464	4:393723-410559:-1	aarF domain containing kinase 5	Cluster0002
ADGRG1	ENSSSCG00000002815	ENSSSCT00000003115, ENSSSCT00000037501, ENSSSCT00000040726, ENSSSCT00000064327, ENSSSCT00000066416, XM_021093328, XM_021093330, XM_021093331, XM_021093332, XM_021093333, XM_021093334, XM_021093335, XM_021093336, XM_021093337, XM_021093338	6:19527450-19570893:+1	adhesion G protein-coupled receptor G1	Cluster0002
ADIPOR1	.	XM_005668010	.	adiponectin receptor 1	Cluster0002
ADPRHL2	ENSSSCG00000003634	ENSSSCT00000004030	6:92238473-92244514:+1	ADP-ribosylhydrolase like 2	Cluster0002
ADRM1	ENSSSCG00000038718	ENSSSCT00000044242, XM_021078219, XM_021078220	17:61692968-61698141:+1	adhesion regulating molecule 1	Cluster0002
AGFG2	ENSSSCG00000007664	ENSSSCT00000008404, ENSSSCT00000036923, ENSSSCT00000064137, XM_005661910, XM_013995456	3:8467945-8494490:+1	ArfGAP with FG repeats 2	Cluster0002
AIMP2	ENSSSCG00000024245	ENSSSCT00000026197, ENSSSCT00000057069	3:5106171-5117985:-1	aminoacyl tRNA synthetase complex interacting multifunctional protein 2	Cluster0002
AIP	ENSSSCG00000012904	ENSSSCT00000014107, XM_003122456, XM_013994026	2:5042125-5048963:-1	aryl hydrocarbon receptor interacting protein	Cluster0002
AKAP17A	ENSSSCG00000032986	ENSSSCT00000043093, XM_021081363	AEMK02000569.1:896261-904353:+1	A-kinase anchoring protein 17A	Cluster0002
ALDH16A1	ENSSSCG00000003168	ENSSSCT00000003518, ENSSSCT00000047007, XM_005664733, XM_005664735, XM_013998648, XM_013998649, XM_013998650, XM_021094738, XM_021094739, XM_021094740, XM_021094741, XM_021094742, XM_021094744	6:54528848-54548146:+1	aldehyde dehydrogenase 16 family member A1	Cluster0002
ALG12	ENSSSCG00000000980	ENSSSCT00000001070, XM_021091350, XM_021091351	5:716940-729397:+1	ALG12, alpha-1,6-mannosyltransferase	Cluster0002
ALYREF	ENSSSCG00000032655	ENSSSCT00000057499, XM_021066432	12:1099337-1103054:+1	Aly/REF export factor	Cluster0002
AMBRA1	ENSSSCG00000013262	ENSSSCT00000014486, ENSSSCT00000035985, ENSSSCT00000039176, ENSSSCT00000045828, ENSSSCT00000059623, XM_003122844, XM_005660955, XM_013994370, XM_021085242, XM_021085243, XM_021085244, XM_021085246, XM_021085247	2:15935373-16122864:+1	autophagy and beclin 1 regulator 1	Cluster0002
AMPD2	ENSSSCG00000031125	ENSSSCT00000043867, ENSSSCT00000044677, ENSSSCT00000060220, ENSSSCT00000065590, XM_021090065, XM_021090066, XM_021090067, XM_021090068	4:110489904-110505105:-1	adenosine monophosphate deaminase 2	Cluster0002
ANAPC2	ENSSSCG00000032828	ENSSSCT00000044999, XM_021081169	AEMK02000682.1:711813-722517:+1	anaphase promoting complex subunit 2	Cluster0002
ANKRD11	ENSSSCG00000039541	ENSSSCT00000044664, ENSSSCT00000047946, ENSSSCT00000053956, XM_021097034, XM_021097035, XM_021097036, XM_021097037, XM_021097038, XM_021097039, XM_021097040, XM_021097041	6:519828-612194:+1	ankyrin repeat domain 11	Cluster0002
ANKRD16	ENSSSCG00000028790	ENSSSCT00000029024, XM_005668213	10:65109084-65122187:+1	ankyrin repeat domain 16	Cluster0002
ANKRD27	ENSSSCG00000002859	ENSSSCT00000003160, ENSSSCT00000045176, ENSSSCT00000045922, ENSSSCT00000049000, ENSSSCT00000051135, ENSSSCT00000051630, XM_013988549, XM_021094270, XM_021094271	6:42392901-42560004:-1	ankyrin repeat domain 27	Cluster0002
ANKS3	ENSSSCG00000007939	ENSSSCT00000008701, ENSSSCT00000041338, ENSSSCT00000044528, ENSSSCT00000053580, XM_021086672, XM_021086673	3:37640448-37691738:+1	ankyrin repeat and sterile alpha motif domain containing 3	Cluster0002
ANKZF1	.	XM_001925639	.	ankyrin repeat and zinc finger domain containing 1	Cluster0002
ANXA11	ENSSSCG00000010331	ENSSSCT00000011309, ENSSSCT00000033910, XM_001924178, XM_005671147, XM_021073998	14:81835194-81879565:+1	annexin A11	Cluster0002
AP1G2	ENSSSCG00000002015	ENSSSCT00000002254, ENSSSCT00000059093, ENSSSCT00000063590, ENSSSCT00000066171, XM_013978200, XM_013978201, XM_013978202	7:75530033-75549488:+1	adaptor related protein complex 1 gamma 2 subunit	Cluster0002
AP2A1	ENSSSCG00000003199	ENSSSCT00000003554, ENSSSCT00000026861, XM_021094758, XM_021094760	6:54786699-54823541:+1	adaptor related protein complex 2 alpha 1 subunit	Cluster0002
AP2A2	ENSSSCG00000012836	ENSSSCT00000014031, XM_021082580, XM_021082581, XM_021082582	2:580191-632663:+1	adaptor related protein complex 2 alpha 2 subunit	Cluster0002
AP4M1	ENSSSCG00000034288	ENSSSCT00000047201, ENSSSCT00000054274, XM_021086201, XM_021086202	3:8013002-8020184:+1	adaptor related protein complex 4 mu 1 subunit	Cluster0002
AP5B1	ENSSSCG00000012978	ENSSSCT00000014186, ENSSSCT00000053652, XM_003122530, XM_005660690, XM_021082823	2:6538246-6551209:+1	adaptor related protein complex 5 beta 1 subunit	Cluster0002
AP5Z1	ENSSSCG00000007577	ENSSSCT00000008316, XM_005661828, XM_005661829, XM_005661830	3:3622684-3642412:+1	adaptor related protein complex 5 zeta 1 subunit	Cluster0002
APBA3	ENSSSCG00000013492	ENSSSCT00000014738, ENSSSCT00000040504, ENSSSCT00000063127, XM_003123055	2:74929342-74945290:+1	amyloid beta precursor protein binding family A member 3	Cluster0002
APEH	ENSSSCG00000011385	ENSSSCT00000012463, ENSSSCT00000023528, XM_005669560	13:32205709-32214522:+1	acylaminoacyl-peptide hydrolase	Cluster0002
APEX1	.	XM_021098038, XM_021098039	.	apurinic/apyrimidinic endodeoxyribonuclease 1	Cluster0002
APRT	ENSSSCG00000002650	ENSSSCT00000002941, XM_021093642, XM_021093643, XM_021093644	6:890903-893277:+1	adenine phosphoribosyltransferase	Cluster0002
ARF5	ENSSSCG00000016593	ENSSSCT00000018066	18:20694359-20699110:-1	ADP ribosylation factor 5	Cluster0002
ARF6	ENSSSCG00000005012	ENSSSCT00000005528, ENSSSCT00000058177, XM_005659939	1:179712932-179734451:+1	ADP ribosylation factor 6	Cluster0002
ARFGAP1	ENSSSCG00000032235	ENSSSCT00000039233, ENSSSCT00000061928, XM_021077586, XM_021077587, XM_021077588, XM_021077589, XM_021077590, XM_021077591, XM_021077592	17:62380066-62394499:+1	ADP ribosylation factor GTPase activating protein 1	Cluster0002
ARFGAP2	ENSSSCG00000013245	ENSSSCT00000014465, ENSSSCT00000027492, ENSSSCT00000062485	2:15390427-15401228:+1	ADP ribosylation factor GTPase activating protein 2	Cluster0002
ARFRP1	ENSSSCG00000035304	ENSSSCT00000051782, XM_021078377, XM_021078378, XM_021078379, XM_021078380	17:62636588-62642451:-1	ADP ribosylation factor related protein 1	Cluster0002
ARHGAP1	ENSSSCG00000013256	ENSSSCT00000014480, ENSSSCT00000056878, XM_003122825, XM_013994368, XM_021085239, XM_021085240	2:15834270-15857543:+1	Rho GTPase activating protein 1	Cluster0002
ARHGAP39	ENSSSCG00000005894	ENSSSCT00000006473, XM_003125457	4:241979-273642:+1	Rho GTPase activating protein 39	Cluster0002
ARHGDIA	ENSSSCG00000034058	ENSSSCT00000040580, ENSSSCT00000042867, ENSSSCT00000054400, ENSSSCT00000054661, XM_021066136, XM_021066138, XM_021066139	12:1093195-1121126:+1	Rho GDP dissociation inhibitor alpha	Cluster0002
ARHGEF17	ENSSSCG00000014822	ENSSSCT00000016174, XM_003357192	9:7767128-7825035:+1	Rho guanine nucleotide exchange factor 17	Cluster0002
ARID1A	ENSSSCG00000003559	ENSSSCT00000003953, ENSSSCT00000057023, ENSSSCT00000063135, XM_021095630, XM_021095631	6:84049087-84127790:+1	AT-rich interaction domain 1A	Cluster0002
ARMC5	ENSSSCG00000025245	ENSSSCT00000031066, ENSSSCT00000057304, XM_021086388	3:17100897-17108981:-1	armadillo repeat containing 5	Cluster0002
ARPC1A	.	XM_005661855	.	actin related protein 2/3 complex subunit 1A	Cluster0002
ARPIN	.	XM_021098268, XM_021098269, XM_021098270, XM_021098272	.	actin related protein 2/3 complex inhibitor	Cluster0002
ARRDC1	ENSSSCG00000039824	ENSSSCT00000037362, ENSSSCT00000053624, ENSSSCT00000054861, ENSSSCT00000058193, ENSSSCT00000061338, ENSSSCT00000062621, XM_021081097, XM_021081098, XM_021081099, XM_021081100, XM_021081101, XM_021081102, XM_021081103, XM_021081104, XM_021081105, XM_021081106, XM_021081107, XM_021081108, XM_021081109, XM_021081110, XM_021081111, XM_021081112, XM_021081113	AEMK02000682.1:390200-401852:-1	arrestin domain containing 1	Cluster0002
ASAP3	ENSSSCG00000028108	ENSSSCT00000022632, ENSSSCT00000040503, ENSSSCT00000064920, XM_021095526	6:81309748-81360248:-1	ArfGAP with SH3 domain, ankyrin repeat and PH domain 3	Cluster0002
ASB6	ENSSSCG00000005679	ENSSSCT00000006244, XM_005654566	1:269828286-269834278:-1	ankyrin repeat and SOCS box containing 6	Cluster0002
ASPSCR1	ENSSSCG00000040727	ENSSSCT00000043862, ENSSSCT00000045296, ENSSSCT00000055014, ENSSSCT00000060959, XM_021066376, XM_021066378, XM_021066379, XM_021066380	12:995689-1031128:-1	ASPSCR1, UBX domain containing tether for SLC2A4	Cluster0002
ASXL1	ENSSSCG00000007248	ENSSSCT00000007930, ENSSSCT00000038792, ENSSSCT00000051049, ENSSSCT00000053508, ENSSSCT00000054073, ENSSSCT00000058891, ENSSSCT00000063789, XM_021077426, XM_021077427, XM_021077428	17:35985535-36068178:+1	additional sex combs like 1, transcriptional regulator	Cluster0002
ATF6B	ENSSSCG00000001430	ENSSSCT00000001575, ENSSSCT00000036323, XM_021097945, XM_021097946, XM_021097947, XM_021097948, XM_021097950, XM_021097951, XM_021097952, XM_021097953, XM_021097954, XM_021097956, XM_021097957, XM_021097958	7:24161053-24171742:-1	activating transcription factor 6 beta	Cluster0002
ATG101	ENSSSCG00000033687	ENSSSCT00000047310, ENSSSCT00000063502, XM_021091674, XM_021091675, XM_021091676, XM_021091677	5:17417819-17426528:+1	autophagy related 101	Cluster0002
ATG13	ENSSSCG00000013257	ENSSSCT00000014481, ENSSSCT00000039071, ENSSSCT00000042777, ENSSSCT00000053628, ENSSSCT00000060155, XM_003122826, XM_005660944, XM_005660945, XM_005660946, XM_005660949, XM_005660950, XM_005660951, XM_021085237, XM_021085238	2:15856860-15916399:-1	autophagy related 13	Cluster0002
ATG2A	ENSSSCG00000023890	ENSSSCT00000026889, ENSSSCT00000041502, ENSSSCT00000054729, ENSSSCT00000057157, XM_021077540	2:7261756-7282611:+1	autophagy related 2A	Cluster0002
ATG4B	ENSSSCG00000032919	ENSSSCT00000047384, ENSSSCT00000058721, XM_021074594	15:140223889-140246321:+1	autophagy related 4B cysteine peptidase	Cluster0002
ATN1	ENSSSCG00000025117	ENSSSCT00000028309, ENSSSCT00000061206, XM_003126540, XM_005652594	5:63782162-63796169:-1	atrophin 1	Cluster0002
ATP13A1	ENSSSCG00000013930	ENSSSCT00000015216, ENSSSCT00000041308, XM_013987501	2:58267720-58296258:+1	ATPase 13A1	Cluster0002
ATP13A2	ENSSSCG00000031082	ENSSSCT00000029404, ENSSSCT00000031813, ENSSSCT00000053686, XM_005665049, XM_005665050, XM_005665051, XM_013999018, XM_021095421, XM_021095422, XM_021095424	6:75618314-75638584:-1	ATPase 13A2	Cluster0002
ATRIP	ENSSSCG00000011359	ENSSSCT00000012436, XM_005669525	13:31159949-31179010:+1	ATR interacting protein	Cluster0002
ATXN2L	ENSSSCG00000021845	ENSSSCT00000029453, ENSSSCT00000037339, ENSSSCT00000048591, ENSSSCT00000050424, ENSSSCT00000060828, ENSSSCT00000063630, XM_003124511, XM_003354561, XM_003354562, XM_003354564, XM_005662049, XM_005662050, XM_005662052, XM_005662054, XM_021088042, XM_021088044, XM_021088045, XM_021088046, XM_021088048	3:18506052-18519056:+1	ataxin 2 like	Cluster0002
ATXN7L2	ENSSSCG00000006828	ENSSSCT00000007479, XM_005663590, XM_021090074, XM_021090075	4:110637237-110646042:-1	ataxin 7 like 2	Cluster0002
AURKAIP1	ENSSSCG00000038474	ENSSSCT00000044905, ENSSSCT00000052240, XM_021097450, XM_021097451, XM_021097452, XM_021097453, XM_021097454	6:63656119-63658000:-1	aurora kinase A interacting protein 1	Cluster0002
AXIN1	ENSSSCG00000023204	ENSSSCT00000023524, ENSSSCT00000053343, XM_021086926, XM_021086927, XM_021086928, XM_021086929, XM_021086930, XM_021086931	3:41348117-41394714:+1	axin 1	Cluster0002
AXL	ENSSSCG00000038806	ENSSSCT00000046198	6:49245802-49277917:+1	AXL receptor tyrosine kinase	Cluster0002
B3GALT4	ENSSSCG00000001503	ENSSSCT00000001676	7:29643177-29644845:+1	beta-1,3-galactosyltransferase 4	Cluster0002
B3GALT6	ENSSSCG00000022151	ENSSSCT00000023773	6:63540141-63541112:+1	beta-1,3-galactosyltransferase 6	Cluster0002
B3GAT3	ENSSSCG00000020809	ENSSSCT00000023287, ENSSSCT00000065750, XM_013994208, XM_013994209	2:9119631-9125063:+1	beta-1,3-glucuronyltransferase 3	Cluster0002
B3GNTL1	.	XM_003131147, XM_005656882, XM_021066333, XM_021066334	.	UDP-GlcNAc:betaGal beta-1,3-N-acetylglucosaminyltransferase like 1	Cluster0002
B9D1	ENSSSCG00000039681	ENSSSCT00000055077, XM_021067970	12:60162638-60174202:+1	B9 domain containing 1	Cluster0002
B9D2	ENSSSCG00000003013	ENSSSCT00000003346	6:49349710-49358404:-1	B9 domain containing 2	Cluster0002
BABAM1	ENSSSCG00000031073	ENSSSCT00000050512, XM_021083571, XM_021083572	2:60397400-60407921:-1	BRISC and BRCA1 A complex member 1	Cluster0002
BAHD1	ENSSSCG00000004772	ENSSSCT00000005271, ENSSSCT00000044464, ENSSSCT00000060819, ENSSSCT00000066319, XM_013993174, XM_021097659, XM_021097670, XM_021097680, XM_021097688, XM_021097694	1:130847278-130878321:-1	bromo adjacent homology domain containing 1	Cluster0002
BAP1	ENSSSCG00000011438	ENSSSCT00000012518, ENSSSCT00000037523, ENSSSCT00000061123, ENSSSCT00000065124, XM_001925236	13:34544572-34553621:-1	BRCA1 associated protein 1	Cluster0002
BAX	ENSSSCG00000003144	ENSSSCT00000003487, ENSSSCT00000063771, XM_003127290, XM_013998624	6:54210654-54229745:+1	BCL2 associated X, apoptosis regulator	Cluster0002
BBC3	.	XM_003127254, XM_005664627, XM_013998532, XM_013998533	.	BCL2 binding component 3	Cluster0002
BCL3	ENSSSCG00000027426	ENSSSCT00000035316, ENSSSCT00000036014	6:51255938-51265354:+1	BCL3, transcription coactivator	Cluster0002
BCL7B	ENSSSCG00000007708	ENSSSCT00000008451, XM_003354498, XM_013995535	3:10850350-10869319:-1	BCL tumor suppressor 7B	Cluster0002
BCL7C	ENSSSCG00000007776	ENSSSCT00000008523, XM_003124483, XM_013995586	3:17547426-17551783:+1	BCL tumor suppressor 7C	Cluster0002
[truncated: 17,922 more rows]

## Sheet: ENSSSCG and LOC genes 
Supplementary Table S2
Network analysis of the pig transcriptional atlas
ENSSSCG and LOC genes
Cluster number	Number ENSSSCG	Number LOC	Total in cluster	% ENSSSCG	% LOC	% Unannotated		Expression pattern
049	21	22	50	42	44	86		Digestive tract, forebrain, tonsil, lymph nodes, spleen (one) > ovary (two), male reproductive
029	86	10	112	76.7857	8.92857	85.7143		Hippocampus (fetal) >oocyte > random samples
050	39	3	49	79.5918	6.12245	85.7143		Duodenum > other intestine, spleen, alveolar macrophages
059	22	8	41	53.6585	19.5122	73.1707		Liver (one)
052	23	7	47	48.9362	14.8936	63.8298		Kidney only, one sample very high
028	75	16	157	47.7707	10.1911	57.9618		Stem cells >> iPSC
057	20	3	41	48.7805	7.31707	56.0976		Pituitary gland only
027	40	25	116	34.4828	21.5517	56.0345		Ileum >>> other digestive tract
045	14	15	53	26.4151	28.3019	54.717		Mixture of multiple tissues (one) >> random other samples
055	19	3	43	44.186	6.97674	51.1628		Ovary (one) >> ovary (two)
037	35	0	72	48.6111	0	48.6111		Digestive tract, spleen, ovary > adipose, lung, blood > muscle, heart, liver, kidney
044	21	3	55	38.1818	5.45455	43.6364		Immune, digestive tract
015	44	72	274	16.0584	26.2774	42.3358		Ear >>> adipose (some)
042	15	12	64	23.4375	18.75	42.1875		Kidney cell line
038	26	3	70	37.1429	4.28571	41.4286		Stomach >>> fibroblasts, somatic cells
041	18	6	64	28.125	9.375	37.5		Primordia of developing teeth only
034	21	6	74	28.3784	8.10811	36.4865		Pituitary gland only
025	23	22	127	18.1102	17.3228	35.4331		Uterine endometrium > chorion
003	296	213	1505	19.6678	14.1528	33.8206		Testis only
024	31	13	131	23.6641	9.92366	33.5878		Epididymis
056	13	1	42	30.9524	2.38095	33.3333		Testis > CNS, digestive tract > other male reproductive
026	30	10	125	24	8	32		Peripheral blood only
053	11	4	47	23.4043	8.51064	31.9149		Endometrium of pregnancy >> uterine endometrium
019	40	13	169	23.6686	7.69231	31.3609		Large intestine > small intestine
001	527	58	1902	27.7077	3.04942	30.7571		Digestive tract, CNS > immune > others
039	13	8	69	18.8406	11.5942	30.4348		Alveolar macrophages > BMDMs > lung
017	27	28	181	14.9171	15.4696	30.3867		Fetal thymus >>> immune system, blood
040	12	8	66	18.1818	12.1212	30.303		Penis >> tonsil >> alveolar macrophages
032	16	9	85	18.8235	10.5882	29.4118		Duodenum >> ileum, caecum, colon
021	32	13	154	20.7792	8.44156	29.2208		Ovary (three only)
046	14	1	53	26.4151	1.88679	28.3019		iPSC >> CNS, digestive tract
005	113	107	787	14.3583	13.5959	27.9543		Ovary (some) only
022	22	19	147	14.966	12.9252	27.8912		Inner cell mass from day 7-8 embryos only
007	81	47	560	14.4643	8.39286	22.8571		Oocyte only
020	25	9	156	16.0256	5.76923	21.7949		Heart > muscle > kidney, mixture of tissues > digestive tract > liver, lung, immune
009	66	29	445	14.8315	6.51685	21.3483		Liver > mixture of tissues
006	95	42	651	14.5929	6.45161	21.0445		Spleen > lung, peripheral blood > lymph nodes, thymus, tonsil, macrophages
036	10	4	72	13.8889	5.55556	19.4444		Hippocampal formation, amygdala (one) >> other CNS
043	8	3	58	13.7931	5.17241	18.9655		iPSC (one) > other stem cells
031	13	6	104	12.5	5.76923	18.2692		Heart >> muscle > mixture of tissues
008	68	21	502	13.5458	4.18327	17.7291		Kidney >> liver, ovary (two), mixture of tissues
051	6	2	48	12.5	4.16667	16.6667		Ovary (most), CNS
004	199	44	1504	13.2314	2.92553	16.1569		CNS
054	5	2	44	11.3636	4.54545	15.9091		Adipose, lung, ovary, spleen > digestive tract, macrophages > heart
047	7	1	51	13.7255	1.96078	15.6863		BMDM after LPS, some spleen, some lung > blood, some adipose, some ovary > diggestive tract
016	19	10	187	10.1604	5.34759	15.508		BMDM >> alveolar macrophages, immune
023	18	5	151	11.9205	3.31126	15.2318		Inner ear stria vascularis only
033	8	5	86	9.30233	5.81395	15.1163		Longissimus dorsi muscle (two only) >> other muscle, heart, chorion
048	7	0	50	14	0	14		Oocyte > digestive tract, CNS, kidney, lung, spleen, immune, ovary > liver, heart, muscle, adipose
013	25	11	264	9.4697	4.16667	13.6364		Mesenchymal cells > adipose, muscle (some), ovary, lung
030	10	4	107	9.34579	3.73832	13.0841		Fibroblasts > somatic cells
018	15	7	170	8.82353	4.11765	12.9412		Adipose only
058	5	0	41	12.1951	0	12.1951		Inner cell mass >> adipose, kidney, lung, spleen, BMDM, ovary
010	25	14	321	7.78816	4.36137	12.1495		Lung >>> adipose, mixture of tissues
011	30	6	319	9.40439	1.88088	11.2853		Muscle >> heart, mixture of tissues
035	6	2	73	8.21918	2.73973	10.9589		Embryo, inner cell mass > ovary (most), fetal thymus, random others
012	26	0	279	9.319	0	9.319		Fetal thymus, cell lines > immune, ovary > digestive tract, adipose, kidney
002	113	17	1555	7.26688	1.09325	8.36013		Ovary (some) > immune, kidney, adipose > liver, muscle, adipose
014	10	4	262	3.81679	1.52672	5.34351		Stem cells > brain >immune, ovary, adipose, digestive tract

## Sheet: ENSSSCG genes cluster 4
		Supplementary Table S2
		Network analysis of the pig transcriptional atlas
		ENSSSCG genes cluster 4
Ensembl gene ID	Transcript IDs	Location (chr:start-end:strand)	Description	MCL_2.2_6	Ortholog?	Expression in human
ENSSSCG00000000040	ENSSSCT00000000042, ENSSSCT00000000043, ENSSSCT00000040807, ENSSSCT00000049671	5:6604283-6654438:-1	septin 3	Cluster0004
ENSSSCG00000000882	ENSSSCT00000000964, ENSSSCT00000000965, ENSSSCT00000000966, ENSSSCT00000061480	5:84080422-85065974:+1	ankyrin repeat and sterile alpha motif domain containing 1B	Cluster0004
ENSSSCG00000000940	ENSSSCT00000001028, ENSSSCT00000042751, ENSSSCT00000055406, ENSSSCT00000056469, ENSSSCT00000056769, ENSSSCT00000058216, ENSSSCT00000060284	5:99818795-100279030:+1	PTPRF interacting protein alpha 2	Cluster0004
ENSSSCG00000001401	ENSSSCT00000035387	7:23670965-23673279:-1	ATPase H+ transporting V1 subunit G2	Cluster0004
ENSSSCG00000002547	ENSSSCT00000002830, ENSSSCT00000037274, ENSSSCT00000037437, ENSSSCT00000048658, ENSSSCT00000053500, ENSSSCT00000053736, ENSSSCT00000056797, ENSSSCT00000057607, ENSSSCT00000059970, ENSSSCT00000060266	AEMK02000452.1:2109641-2250194:+1	kinesin light chain 1	Cluster0004
ENSSSCG00000002639	ENSSSCT00000002929	6:168452-178462:-1	No Class	Cluster0004	TUBB3	Brain-specific
ENSSSCG00000003045	ENSSSCT00000003382, ENSSSCT00000066316	6:49895083-49931417:+1	ATPase Na+/K+ transporting subunit alpha 3	Cluster0004
ENSSSCG00000003240	ENSSSCT00000003599	6:58273003-58283799:+1	zinc finger protein 268-like	Cluster0004
ENSSSCG00000003781	ENSSSCT00000004184	6:138504030-138615963:+1	glutamate rich 3	Cluster0004
ENSSSCG00000003793	ENSSSCT00000004197	6:142738478-142834884:-1	No Class	Cluster0004	LRRC7	Brain-specific
ENSSSCG00000004054	ENSSSCT00000004482	11:54083015-54083407:-1	40S ribosomal protein S15a pseudogene	Cluster0004
ENSSSCG00000004404	ENSSSCT00000004867, ENSSSCT00000046169, ENSSSCT00000055065	1:76107530-76180306:-1	WAS protein family member 1	Cluster0004
ENSSSCG00000005257	ENSSSCT00000005792	1:223839780-224125540:-1	transient receptor potential cation channel subfamily M member 3	Cluster0004
ENSSSCG00000005475	ENSSSCT00000006021, ENSSSCT00000065297	1:253723776-253742985:-1	ZFP37 zinc finger protein	Cluster0004
ENSSSCG00000006149	ENSSSCT00000006742	4:51785380-52004721:-1	RALY RNA binding protein-like	Cluster0004
ENSSSCG00000006963	ENSSSCT00000007628	6:166706320-166910873:-1	No Class	Cluster0004	RNF220	CNS-enriched
ENSSSCG00000007001	ENSSSCT00000007667, ENSSSCT00000023191, ENSSSCT00000040979	17:25940-112834:-1	ankyrin repeat domain-containing protein 26-like	Cluster0004
ENSSSCG00000007314	ENSSSCT00000008003, ENSSSCT00000036910, ENSSSCT00000038120, ENSSSCT00000046812, ENSSSCT00000048484, ENSSSCT00000049303, ENSSSCT00000050498, ENSSSCT00000051435, ENSSSCT00000055629, ENSSSCT00000060963	17:39360225-39495061:+1	erythrocyte membrane protein band 4.1 like 1	Cluster0004
ENSSSCG00000007398	ENSSSCT00000008098	17:47755669-47759680:-1	colostrum trypsin inhibitor-like	Cluster0004
ENSSSCG00000007578	ENSSSCT00000008317	3:3729531-3776081:-1	monocyte to macrophage differentiation associated 2	Cluster0004
ENSSSCG00000007692	ENSSSCT00000008433, ENSSSCT00000039594	3:9994833-10024031:+1	tyrosine 3-monooxygenase/tryptophan 5-monooxygenase activation protein gamma	Cluster0004
ENSSSCG00000008250	ENSSSCT00000009036, ENSSSCT00000025211, ENSSSCT00000041806, ENSSSCT00000041920, ENSSSCT00000042030, ENSSSCT00000042911, ENSSSCT00000049369, ENSSSCT00000055124	3:63205017-63486666:-1	catenin alpha 2	Cluster0004
ENSSSCG00000008254	ENSSSCT00000009040, ENSSSCT00000053585	3:63977751-64418025:-1	No Class	Cluster0004	CTNNA2 (partial)	Brain-specific (also in testis)
ENSSSCG00000008335	ENSSSCT00000009127	3:72572444-72619437:-1	germ cell-less, spermatogenesis associated 1	Cluster0004
ENSSSCG00000008433	ENSSSCT00000009234, ENSSSCT00000062446	3:93372003-93386649:+1	calmodulin 2	Cluster0004
ENSSSCG00000008452	ENSSSCT00000009254, ENSSSCT00000032182	3:96474459-96590769:+1	leucine rich pentatricopeptide repeat containing	Cluster0004
ENSSSCG00000008584	ENSSSCT00000009394, ENSSSCT00000009398, ENSSSCT00000037752, ENSSSCT00000046148	3:114537226-114636147:-1	FKBP prolyl isomerase 1B	Cluster0004
ENSSSCG00000009118	ENSSSCT00000009985	8:110024159-110028998:+1	No Class	Cluster0004	GNG12	Not enriched in human
ENSSSCG00000009200	ENSSSCT00000010073	8:126880545-126880793:-1	No Class	Cluster0004	GRID2 (partial internal)	Brain-specific
ENSSSCG00000009246	ENSSSCT00000010126	8:135775737-135802405:-1	enolase-phosphatase 1	Cluster0004
ENSSSCG00000009430	ENSSSCT00000010337, ENSSSCT00000040111, ENSSSCT00000041854, ENSSSCT00000042913, ENSSSCT00000043134, ENSSSCT00000048214, ENSSSCT00000050516, ENSSSCT00000058773, ENSSSCT00000059793, ENSSSCT00000064995	11:24702159-24752852:-1	A-kinase anchoring protein 11	Cluster0004
ENSSSCG00000009537	ENSSSCT00000010455	11:74744143-74779944:-1	No Class	Cluster0004	FAM155A (partial)	Brain-specific
ENSSSCG00000009648	ENSSSCT00000010576	14:8961852-8967912:+1	neurofilament medium	Cluster0004
ENSSSCG00000010128	ENSSSCT00000011089, ENSSSCT00000034752, ENSSSCT00000037080, ENSSSCT00000048800, ENSSSCT00000062308	14:51252340-51261616:+1	septin 5	Cluster0004
ENSSSCG00000010344	ENSSSCT00000011324	14:84272928-84402948:+1	No Class	Cluster0004	NRG3 (partial)	Brain-specific
ENSSSCG00000010432	ENSSSCT00000011417	14:99025306-99129155:-1	N-acylsphingosine amidohydrolase 2	Cluster0004
ENSSSCG00000010669	ENSSSCT00000011670, ENSSSCT00000058933	14:127395853-127502399:-1	PDZ domain containing 8	Cluster0004
ENSSSCG00000011121	ENSSSCT00000012171, ENSSSCT00000040633, ENSSSCT00000046686, ENSSSCT00000051735, ENSSSCT00000054037, ENSSSCT00000059882, ENSSSCT00000060918, ENSSSCT00000061358	10:60505385-60867242:-1	CUGBP Elav-like family member 2	Cluster0004
ENSSSCG00000011236	ENSSSCT00000012303, ENSSSCT00000025077, ENSSSCT00000036852, ENSSSCT00000045239, ENSSSCT00000048328, ENSSSCT00000050795, ENSSSCT00000051840, ENSSSCT00000051993, ENSSSCT00000057422, ENSSSCT00000058953	13:19305436-19510887:-1	cytoplasmic linker associated protein 2	Cluster0004
ENSSSCG00000011267	ENSSSCT00000012335	13:24138158-24186386:+1	myelin-associated oligodendrocyte basic protein	Cluster0004
ENSSSCG00000011489	ENSSSCT00000012572, ENSSSCT00000044538, ENSSSCT00000066159	13:43979693-44481682:-1	calcium dependent secretion activator	Cluster0004
ENSSSCG00000012126	ENSSSCT00000013265, ENSSSCT00000033451, ENSSSCT00000033635, ENSSSCT00000034004, ENSSSCT00000034196	X:10429404-10582431:-1	glycoprotein M6B	Cluster0004
ENSSSCG00000012253	ENSSSCT00000035253	X:37168407-37535561:-1	calcium/calmodulin dependent serine protein kinase	Cluster0004
ENSSSCG00000012319	ENSSSCT00000013470, ENSSSCT00000034646	AEMK02000254.1:114521-122441:+1	melanoma-associated antigen D4-like	Cluster0004
ENSSSCG00000012430	ENSSSCT00000013591	X:60951428-60952609:+1	No Class	Cluster0004	TRAPPC13	CNS-enriched
ENSSSCG00000012520	ENSSSCT00000013689, ENSSSCT00000033368, ENSSSCT00000043224, ENSSSCT00000057972, ENSSSCT00000059451, ENSSSCT00000061897	X:83811749-83911568:+1	basic helix-loop-helix family member b9	Cluster0004
ENSSSCG00000012530	ENSSSCT00000033756, ENSSSCT00000034136	X:83580579-83582941:+1	transcription elongation factor A like 2	Cluster0004
ENSSSCG00000012531	ENSSSCT00000033893	X:84488000-84490004:+1	transcription elongation factor A like 3	Cluster0004
ENSSSCG00000013024	ENSSSCT00000014237	2:7520074-7554180:+1	No Class	Cluster0004	NRXN2 (partial)	Brain-specific
ENSSSCG00000013052	ENSSSCT00000014266, ENSSSCT00000050958	2:8287802-8355129:-1	reticulon 3	Cluster0004
ENSSSCG00000013341	ENSSSCT00000014569, ENSSSCT00000043161	2:34931070-35377716:-1	leucine zipper protein 2	Cluster0004
ENSSSCG00000013609	ENSSSCT00000014864	2:70546538-70547374:+1	vomeronasal type-2 receptor 116-like	Cluster0004
ENSSSCG00000013880	ENSSSCT00000015166, ENSSSCT00000038819, ENSSSCT00000040115, ENSSSCT00000050458, ENSSSCT00000061658	2:60057618-60128772:+1	unc-13 homolog A	Cluster0004
ENSSSCG00000014013	ENSSSCT00000015306, ENSSSCT00000035144, ENSSSCT00000045463, ENSSSCT00000056214	2:78515424-78670013:+1	ring finger protein 130	Cluster0004
ENSSSCG00000014037	ENSSSCT00000015333	2:80378684-80381719:+1	transmembrane emp24 domain-containing protein 9	Cluster0004
ENSSSCG00000014264	ENSSSCT00000015585	2:133469575-133475492:-1	histidine triad nucleotide binding protein 1	Cluster0004
ENSSSCG00000014272	ENSSSCT00000015595, ENSSSCT00000045919, ENSSSCT00000064403	2:134210919-134278243:-1	acyl-CoA synthetase long chain family member 6	Cluster0004
ENSSSCG00000014380	ENSSSCT00000015710	2:142830525-142832881:+1	protocadherin beta-5-like	Cluster0004
ENSSSCG00000014935	ENSSSCT00000016292, ENSSSCT00000037972, ENSSSCT00000038199, ENSSSCT00000051131, ENSSSCT00000056661	9:25085079-25471259:+1	FAT atypical cadherin 3	Cluster0004
ENSSSCG00000015401	ENSSSCT00000016776, ENSSSCT00000025400, ENSSSCT00000027728, ENSSSCT00000064638	9:97317846-97508498:+1	piccolo presynaptic cytomatrix protein	Cluster0004
ENSSSCG00000015408	ENSSSCT00000016783, ENSSSCT00000037631	9:100890539-100895402:+1	No Class	Cluster0004	RPL19	Houskeeping
ENSSSCG00000015681	ENSSSCT00000017081	15:11478118-11498529:+1	No Class	Cluster0004	LRP1B (partial)	Brain-specific
ENSSSCG00000016219	ENSSSCT00000017660	15:121364661-121372054:-1	regulated endocrine specific protein 18	Cluster0004
ENSSSCG00000016401	ENSSSCT00000017858	15:139610625-139665202:-1	kinesin family member 1A	Cluster0004
ENSSSCG00000016493	ENSSSCT00000017957	18:8449699-8485234:-1	No Class	Cluster0004	TMEM178B (partial)	CNS-enriched (also endocrine)
ENSSSCG00000016687	ENSSSCT00000018168, ENSSSCT00000047996	18:43209179-43509597:-1	chimerin 2	Cluster0004
ENSSSCG00000016949	ENSSSCT00000018457, ENSSSCT00000042197, ENSSSCT00000044892, ENSSSCT00000047180, ENSSSCT00000059313, ENSSSCT00000063365	16:44146292-44185340:+1	trafficking protein particle complex 13	Cluster0004
ENSSSCG00000017018	ENSSSCT00000018530, ENSSSCT00000049747, ENSSSCT00000050651	16:55625320-56086379:-1	teneurin transmembrane protein 2	Cluster0004
ENSSSCG00000017749	ENSSSCT00000019318	12:43543192-43548564:+1	ecotropic viral integration site 2A	Cluster0004
ENSSSCG00000021315	ENSSSCT00000022930, ENSSSCT00000040282	7:102216957-102777790:+1	neurexin 3	Cluster0004
ENSSSCG00000021656	ENSSSCT00000029280	13:135864539-136156061:-1	No Class	Cluster0004	KALRN (partial)	CNS-enriched (also in gut)
ENSSSCG00000021774	ENSSSCT00000026210, ENSSSCT00000037923, ENSSSCT00000046695, ENSSSCT00000051857, ENSSSCT00000061956	13:100772532-100807993:-1	beta-1,3-N-acetylgalactosaminyltransferase 1 (globoside blood group)	Cluster0004
ENSSSCG00000022083	ENSSSCT00000028266, ENSSSCT00000029451, ENSSSCT00000038082, ENSSSCT00000047551	5:84986748-85148983:+1	ankyrin repeat and sterile alpha motif domain containing 1B	Cluster0004
ENSSSCG00000022331	ENSSSCT00000029012	X:113460199-113530948:-1	fibroblast growth factor 13	Cluster0004
ENSSSCG00000022345	ENSSSCT00000026691, ENSSSCT00000040421, ENSSSCT00000041083	15:80731203-80927746:-1	chimerin 1	Cluster0004
ENSSSCG00000023332	ENSSSCT00000025745, ENSSSCT00000060120	7:101204250-101262335:+1	No Class	Cluster0004	NRXN3 (partial)	Brain-specific
ENSSSCG00000023479	ENSSSCT00000025228, ENSSSCT00000047403	15:18411762-19520491:+1	NCK associated protein 5	Cluster0004
ENSSSCG00000023746	ENSSSCT00000022273	15:10654760-11068576:+1	No Class	Cluster0004	LRP1B (partial)
ENSSSCG00000023754	ENSSSCT00000027842	6:142967027-143274680:-1	No Class	Cluster0004	LRRC7 (partial)	Brain-specific
ENSSSCG00000023891	ENSSSCT00000031304, ENSSSCT00000037591, ENSSSCT00000052030, ENSSSCT00000056930, ENSSSCT00000059175, ENSSSCT00000060634	13:63596320-64205881:+1	glutamate metabotropic receptor 7	Cluster0004
ENSSSCG00000025067	ENSSSCT00000025407, ENSSSCT00000046947, ENSSSCT00000050060, ENSSSCT00000053887, ENSSSCT00000056937, ENSSSCT00000062391	13:122148932-122179498:+1	endothelin converting enzyme 2	Cluster0004
ENSSSCG00000026129	ENSSSCT00000023072, ENSSSCT00000050951, ENSSSCT00000053581	8:60630117-60792899:+1	adhesion G protein-coupled receptor L3	Cluster0004
ENSSSCG00000026180	ENSSSCT00000022921, ENSSSCT00000044158, ENSSSCT00000060996	3:90489183-90914537:+1	neurexin 1	Cluster0004
ENSSSCG00000026529	ENSSSCT00000034232	X:44773835-44779517:+1	diphosphoinositol polyphosphate phosphohydrolase 3-beta	Cluster0004
ENSSSCG00000027665	ENSSSCT00000026498, ENSSSCT00000034240, ENSSSCT00000034585, ENSSSCT00000038169, ENSSSCT00000051984	17:33735160-33821214:+1	tyrosine-protein phosphatase non-receptor type substrate 1	Cluster0004
ENSSSCG00000027870	ENSSSCT00000025498	4:52219593-52219925:-1	No Class	Cluster0004	RALYL (partial)	Brain-specific
ENSSSCG00000027970	ENSSSCT00000027933, ENSSSCT00000063165	3:18048618-18052481:+1	proline rich transmembrane protein 2	Cluster0004
ENSSSCG00000028062	ENSSSCT00000025815	X:83597179-83599213:-1	transcription elongation factor A protein-like 3	Cluster0004
ENSSSCG00000029020	ENSSSCT00000025670	15:114977714-114978418:-1	No Class	Cluster0004	RPL13
ENSSSCG00000029442	ENSSSCT00000022495, ENSSSCT00000029633, ENSSSCT00000038838, ENSSSCT00000039684, ENSSSCT00000040976, ENSSSCT00000042219, ENSSSCT00000048463, ENSSSCT00000049017, ENSSSCT00000057486, ENSSSCT00000060937	2:142505136-142527509:+1	protocadherin alpha-7	Cluster0004
[truncated: 153 more rows]
