# Supplementary material for: Functional Annotation of the Transcriptome of the Pig, Sus scrofa, Based Upon Network Analysis of an RNAseq Transcriptional Atlas
Source: Front Genet. 2020 Feb 14;10:1355. doi: 10.3389/fgene.2019.01355 (PMC7034361; doi:10.3389/fgene.2019.01355)
Supplement: Supplementary file 5 [file Table_4.xlsx]

## Sheet: Readme
Supplementary Table S4
Network analysis of the CNS samples
Sample description and colour coding for histograms
Colours shown along the X axis of the histograms in the Cluster Lists indicate the BioProject (lower bar) and sex based on metadata and other project information (upper bar)
BioProject	Sample ID	Tissue	Breed	Age	Sex from extended information
PRJEB19386	ERS1793644	pituitary gland	Duroc	juvenile stage	female
PRJEB19386	ERS1793665	pituitary gland	Duroc	juvenile stage	female
PRJEB19386	ERS1793671	pituitary gland	Duroc	juvenile stage	male
PRJEB19386	ERS1793676	amygdala	Duroc	juvenile stage	male
PRJEB19386	ERS1793685	amygdala	Duroc	juvenile stage	female
PRJEB19386	ERS1793683	medulla oblongata	Duroc	juvenile stage	female
PRJEB19386	ERS1793692	medulla oblongata	Duroc	juvenile stage	male
PRJEB19386	ERS1793684	pons	Duroc	juvenile stage	female
PRJEB19386	ERS1793687	corpus callosum	Duroc	juvenile stage	female
PRJEB19386	ERS1793695	corpus callosum	Duroc	juvenile stage	male
PRJEB19386	ERS1793688	dorsal plus ventral thalamus	Duroc	juvenile stage	female
PRJEB19386	ERS1793691	brainstem	Duroc	juvenile stage	male
PRJNA292166	SRS1027238	brain stem	unknown	115 day embryo	unknown
PRJEB19386	ERS1793670	hippocampal formation	Duroc	juvenile stage	female
PRJEB19386	ERS1793696	hippocampal formation	Duroc	juvenile stage	male
PRJNA292166	SRS1027235	hippocampus	unknown	60 day embryo	unknown
PRJEB19386	ERS1793689	frontal cortex	Duroc	juvenile stage	male
PRJEB19386	ERS1793681	occipital cortex	Duroc	juvenile stage	female
PRJNA292166	SRS1027242	cortex	unknown	115 day embryo	unknown
PRJNA292166	SRS1027243	cortex	unknown	100 day embryo	unknown
PRJNA292166	SRS1027244	cortex	unknown	80 day embryo	unknown
PRJNA292166	SRS1027245	cortex	unknown	60 day embryo	unknown
PRJNA292166	SRS1027246	cortex	unknown	42 day embryo	unknown
PRJNA225941	SRS497445	hypothalamus	Iberian x Landrace backcross	unknown	male
PRJNA225941	SRS497448	hypothalamus	Iberian x Landrace backcross	unknown	male
PRJNA292166	SRS1027247	forebrain	unknown	22 day embryo	unknown
PRJNA407675	SRS2520754	brain	Landrace gilt	50 days gestation	female
PRJNA407675	SRS2520755	brain	Landrace gilt	50 days gestation	female
PRJNA407675	SRS2520756	brain	Landrace gilt	50 days gestation	female
PRJNA407675	SRS2520757	brain	Landrace gilt	50 days gestation	male
PRJNA407675	SRS2520758	brain	Landrace gilt	50 days gestation	male

## Sheet: Clusters r-0.85
Supplementary Table S4						Supplementary Table S4
Network analysis of the CNS samples						Network analysis of the CNS samples
						Cluster profiles and gene lists for CNS analysis
Name	Connections	Ensembl gene ID	Transcript IDs	Location (chr:start-end:strand)	Description	MCL_1.7_6
AAGAB	299	ENSSSCG00000004951	ENSSSCT00000005463, ENSSSCT00000039105, ENSSSCT00000062113, XM_003121743, XM_005659865, XM_005659866, XM_021100396	1:165127994-165192944:-1	alpha- and gamma-adaptin binding protein	Cluster001
AASDHPPT	210	ENSSSCG00000014998	ENSSSCT00000016362, ENSSSCT00000060544, XM_003129822, XM_005667292	9:35903634-35951266:+1	aminoadipate-semialdehyde dehydrogenase-phosphopantetheinyl transferase	Cluster001
ABCA1	3	ENSSSCG00000005423	ENSSSCT00000005966	1:246147515-246257380:-1	ATP binding cassette subfamily A member 1	Cluster001
ABCC4	49	.	XM_021065786, XM_021065787	.	ATP binding cassette subfamily C member 4	Cluster001
ABHD17C	250	ENSSSCG00000001782	ENSSSCT00000034526, XM_003128448	7:49540663-49598071:+1	abhydrolase domain containing 17C	Cluster001
ABI2	149	ENSSSCG00000034630	ENSSSCT00000043165, ENSSSCT00000049709, ENSSSCT00000052536, ENSSSCT00000052580, ENSSSCT00000053691, XM_021075325, XM_021075326, XM_021075327, XM_021075328, XM_021075329, XM_021075330, XM_021075331, XM_021075332, XM_021075333, XM_021075334, XM_021075335, XM_021075336, XM_021075337, XM_021075338, XM_021075339, XM_021075340, XM_021075341	15:106776627-106900333:+1	abl interactor 2	Cluster001
ABLIM3	78	ENSSSCG00000014430	ENSSSCT00000015774, ENSSSCT00000045425, ENSSSCT00000056134, ENSSSCT00000061409, ENSSSCT00000062166, ENSSSCT00000064601, XM_021084982, XM_021084983, XM_021084984, XM_021084985, XM_021084987, XM_021084988, XM_021084989, XM_021084990, XM_021084991, XM_021084992, XM_021084993, XM_021084994, XM_021084995, XM_021084996, XM_021084997, XM_021084998, XM_021084999, XM_021085000, XM_021085001, XM_021085002,…	2:150260183-150423211:+1	actin binding LIM protein family member 3	Cluster001
ACACA	451	ENSSSCG00000017694	ENSSSCT00000019259, ENSSSCT00000038360, ENSSSCT00000042467, ENSSSCT00000055904, ENSSSCT00000056594, XM_021066227, XM_021066228, XM_021066229, XM_021066230, XM_021066231, XM_021066233, XM_021066234, XM_021066235, XM_021066236, XM_021066237, XM_021066238	12:38581451-38875134:-1	acetyl-CoA carboxylase alpha	Cluster001
ACBD3	155	ENSSSCG00000024180	ENSSSCT00000027902, ENSSSCT00000029429	10:14032673-14069481:-1	acyl-CoA binding domain containing 3	Cluster001
ACBD6	154	ENSSSCG00000015534	ENSSSCT00000016923, XM_003130348, XM_003357562, XM_005656747, XM_013989657, XM_013989658, XM_021063753, XM_021063754	9:121913187-122116233:-1	acyl-CoA binding domain containing 6	Cluster001
ACVR1B	35	ENSSSCG00000000233	ENSSSCT00000000252, XM_013988268	5:17314276-17350723:+1	activin A receptor type 1B	Cluster001
ACVR2A	102	ENSSSCG00000015669	ENSSSCT00000017067, ENSSSCT00000046920	15:4173797-4259962:-1	activin A receptor type 2A	Cluster001
ADAL	27	ENSSSCG00000004710	ENSSSCT00000005202, ENSSSCT00000049753, XM_005659689, XM_013993096, XM_013993097, XM_013993098, XM_013993099	1:128089963-128125932:-1	adenosine deaminase like	Cluster001
ADAM10	82	ENSSSCG00000004595	ENSSSCT00000005076, ENSSSCT00000032619	1:113289084-113412543:+1	ADAM metallopeptidase domain 10	Cluster001
ADAM7	206	ENSSSCG00000009646	ENSSSCT00000010574, ENSSSCT00000046971, ENSSSCT00000065666	14:8484648-8557213:+1	ADAM metallopeptidase domain 7	Cluster001
ADAMTS19	1	ENSSSCG00000014259	ENSSSCT00000015580, ENSSSCT00000043399, XM_021084737	2:132144862-132409660:+1	ADAM metallopeptidase with thrombospondin type 1 motif 19	Cluster001
ADAMTS6	1	ENSSSCG00000016943	ENSSSCT00000018451, ENSSSCT00000040629, ENSSSCT00000058489, XM_021076778	16:43702520-44011065:-1	ADAM metallopeptidase with thrombospondin type 1 motif 6	Cluster001
ADAMTSL3	506	ENSSSCG00000001793	ENSSSCT00000002009, ENSSSCT00000042317, ENSSSCT00000045912, XM_021098873, XM_021098875	7:51006366-51363704:-1	ADAMTS like 3	Cluster001
ADD2	109	ENSSSCG00000020736	ENSSSCT00000028719, XM_021087397	3:71730003-71840861:+1	adducin 2	Cluster001
ADGRL2	657	ENSSSCG00000003761	ENSSSCT00000004163, ENSSSCT00000038746, ENSSSCT00000039570, ENSSSCT00000044796, ENSSSCT00000050160, ENSSSCT00000050877, ENSSSCT00000059785, ENSSSCT00000063942, ENSSSCT00000065512, ENSSSCT00000065589, XM_005656126, XM_005656127, XM_013988854, XM_013988855, XM_013988857, XM_013988862, XM_021096375, XM_021096376, XM_021096377, XM_021096378, XM_021096379, XM_021096380, XM_021096381, XM_021096382, XM_…	6:131727085-132365891:-1	adhesion G protein-coupled receptor L2	Cluster001
ADGRL3	33	.	XM_021100590	.	adhesion G protein-coupled receptor L3	Cluster001
ADGRL4	167	ENSSSCG00000003762	ENSSSCT00000004164, ENSSSCT00000041037, ENSSSCT00000046464, XM_005665360, XM_005665361	6:134362483-134465839:+1	adhesion G protein-coupled receptor L4	Cluster001
ADGRV1	2	ENSSSCG00000035025	ENSSSCT00000045697, XM_021085372, XM_021085373, XM_021085374, XM_021085375, XM_021085376	2:97775485-98002203:+1	adhesion G protein-coupled receptor V1	Cluster001
ADNP	370	ENSSSCG00000007473	ENSSSCT00000008178, ENSSSCT00000034395, ENSSSCT00000040843, ENSSSCT00000042704, ENSSSCT00000046175, ENSSSCT00000059539, XM_013985467, XM_021077204	17:52317366-52355467:-1	activity dependent neuroprotector homeobox	Cluster001
ADNP2	536	ENSSSCG00000038632	ENSSSCT00000058793, XM_003122295, XM_005660559, XM_013993971	6:128084831-128113291:+1	ADNP homeobox 2	Cluster001
AFAP1	724	ENSSSCG00000023907	ENSSSCT00000009536, ENSSSCT00000032392, ENSSSCT00000039817, ENSSSCT00000044439	8:3066782-3202533:+1	actin filament associated protein 1	Cluster001
AFF2	216	ENSSSCG00000012730	ENSSSCT00000013917, ENSSSCT00000041296, ENSSSCT00000058646, XM_005654300, XM_013984014, XM_013984020, XM_013984028, XM_013984031, XM_013984035, XM_013984036, XM_013984042, XM_013984046, XM_021080471, XM_021080472	X:120777477-121259228:+1	AF4/FMR2 family member 2	Cluster001
AFF3	150	.	XM_021088183, XM_021088184, XM_021088185, XM_021088186, XM_021088187, XM_021088188, XM_021088189, XM_021088190, XM_021088191, XM_021088192, XM_021088194, XM_021088195, XM_021088196, XM_021088197, XM_021088198	.	AF4/FMR2 family member 3	Cluster001
AFF4	98	ENSSSCG00000014291	ENSSSCT00000015614, ENSSSCT00000025744, ENSSSCT00000045065, ENSSSCT00000062227, XM_003123929, XM_021084747, XM_021084749, XM_021084750, XM_021084751	2:135197775-135283923:-1	AF4/FMR2 family member 4	Cluster001
AGGF1	704	.	XM_003123715	.	angiogenic factor with G-patch and FHA domains 1	Cluster001
AGO3	186	ENSSSCG00000003630	ENSSSCT00000004025, ENSSSCT00000004026, ENSSSCT00000004027, ENSSSCT00000030097, ENSSSCT00000038441, ENSSSCT00000038526, ENSSSCT00000045582, ENSSSCT00000056463, ENSSSCT00000064566, ENSSSCT00000065601, XM_021093288, XM_021093289, XM_021093290, XM_021093291	6:91967494-92212455:+1	argonaute 3, RISC catalytic component	Cluster001
AGRN	425	ENSSSCG00000022204	ENSSSCT00000023306, ENSSSCT00000026215, ENSSSCT00000046709, ENSSSCT00000050291, ENSSSCT00000053890, ENSSSCT00000054906, ENSSSCT00000057408, ENSSSCT00000058539, ENSSSCT00000065088, XM_021095177, XM_021095178	6:63365988-63398724:+1	agrin	Cluster001
AGTPBP1	368	ENSSSCG00000010957	ENSSSCT00000011993, ENSSSCT00000045685, ENSSSCT00000064134, XM_005656805, XM_005656806, XM_013989714, XM_021064641	10:29439434-29589868:+1	ATP/GTP binding protein 1	Cluster001
AHCTF1	132	ENSSSCG00000010863	ENSSSCT00000011885, ENSSSCT00000039756, ENSSSCT00000047033, XM_021064441, XM_021064442, XM_021064443	10:15041762-15121942:+1	AT-hook containing transcription factor 1	Cluster001
AHR	19	ENSSSCG00000030484	ENSSSCT00000031031	9:86511339-86556143:+1	aryl hydrocarbon receptor	Cluster001
AIDA	13	ENSSSCG00000010835	ENSSSCT00000011854, XM_003130513, XM_013980033	10:11428399-11466854:-1	axin interactor, dorsalization associated	Cluster001
AK3	472	.	XM_001924679, XM_021064130, XM_021064132	.	adenylate kinase 3	Cluster001
AKAP7	301	ENSSSCG00000036790	ENSSSCT00000037551, ENSSSCT00000037683, ENSSSCT00000043979, ENSSSCT00000056163, XM_021087993	1:32221061-32362001:-1	A-kinase anchoring protein 7	Cluster001
AKAP8L	321	ENSSSCG00000013838	ENSSSCT00000015116, ENSSSCT00000058689, XM_005652898, XM_021083627, XM_021083628, XM_021083629	2:62184763-62221931:+1	A-kinase anchoring protein 8 like	Cluster001
AKAP9	629	ENSSSCG00000015310	ENSSSCT00000016683, ENSSSCT00000023446, ENSSSCT00000025278, ENSSSCT00000030484, ENSSSCT00000041238, ENSSSCT00000042493, ENSSSCT00000058131, ENSSSCT00000063634, ENSSSCT00000064131, XM_021102178, XM_021102179, XM_021102180, XM_021102181, XM_021102182, XM_021102183, XM_021102184, XM_021102185, XM_021102186, XM_021102187, XM_021102188, XM_021102189, XM_021102190, XM_021102191, XM_021102192, XM_021102…	9:71895563-72054897:+1	A-kinase anchoring protein 9	Cluster001
AKT3	481	ENSSSCG00000010872	ENSSSCT00000011894, ENSSSCT00000033298, ENSSSCT00000035590, ENSSSCT00000045011, ENSSSCT00000055643, XM_005667942, XM_005667945, XM_013980051, XM_021063994, XM_021063995	10:16441447-16741750:-1	AKT serine/threonine kinase 3	Cluster001
ALDH1B1	7	ENSSSCG00000005361	ENSSSCT00000005901, XM_003353586	1:239109809-239114730:+1	aldehyde dehydrogenase 1 family member B1	Cluster001
ALDH1L2	692	ENSSSCG00000000839	ENSSSCT00000000912, ENSSSCT00000000913, XM_001926587	5:79491978-79554896:+1	aldehyde dehydrogenase 1 family member L2	Cluster001
ALG10	148	.	XM_005664001, XM_013997746	.	ALG10, alpha-1,2-glucosyltransferase	Cluster001
ALG13	90	ENSSSCG00000012586	ENSSSCT00000034890, ENSSSCT00000035555, ENSSSCT00000065090, XM_021080435	X:91644310-91708689:+1	ALG13, UDP-N-acetylglucosaminyltransferase subunit	Cluster001
ALKBH3	126	ENSSSCG00000040937	ENSSSCT00000044385, XM_003353890, XM_021083167, XM_021083168	2:18408992-18448167:-1	alkB homolog 3, alpha-ketoglutaratedependent dioxygenase	Cluster001
ALMS1	401	ENSSSCG00000037977	ENSSSCT00000026747, ENSSSCT00000042211, ENSSSCT00000042837, ENSSSCT00000054590, ENSSSCT00000064085, XM_005662464, XM_005662465, XM_013996028, XM_021087373, XM_021087374	3:69253851-69417147:-1	ALMS1, centrosome and basal body associated protein	Cluster001
ALS2	198	ENSSSCG00000016109	ENSSSCT00000017539, ENSSSCT00000041723, ENSSSCT00000041838, ENSSSCT00000045541, ENSSSCT00000055322, XM_021076179, XM_021076181, XM_021076182, XM_021076183, XM_021076184, XM_021076185, XM_021076186	15:105328718-105401542:-1	ALS2, alsin Rho guanine nucleotide exchange factor	Cluster001
AMER1	530	ENSSSCG00000012361	ENSSSCT00000013518, ENSSSCT00000033964, XM_005657813, XM_013990913, XM_013990914	X:50844675-50863982:-1	APC membrane recruitment protein 1	Cluster001
AMOTL2	141	ENSSSCG00000011643	ENSSSCT00000012744, XM_021069473	13:75490959-75509420:-1	angiomotin like 2	Cluster001
ANAPC1	51	ENSSSCG00000008105	ENSSSCT00000008879, ENSSSCT00000037279, ENSSSCT00000051961, ENSSSCT00000053155, ENSSSCT00000054401, ENSSSCT00000059545, ENSSSCT00000062634, XM_021087031, XM_021087032, XM_021087034, XM_021087035, XM_021087036, XM_021087037, XM_021087038, XM_021087039, XM_021087040	3:44509680-44605014:+1	anaphase promoting complex subunit 1	Cluster001
ANAPC15	82	ENSSSCG00000014806	ENSSSCT00000016157, ENSSSCT00000045153, ENSSSCT00000051873, ENSSSCT00000054269, XM_003129592, XM_005653676, XM_005653677, XM_005653678, XM_005653680, XM_005653681, XM_005653682, XM_013999278, XM_013999284, XM_013999319, XM_013999329, XM_021062459, XM_021062460, XM_021062461, XM_021062462, XM_021062463, XM_021062464, XM_021062465, XM_021062466, XM_021062467, XM_021062468, XM_021062469, XM_021062470	9:6684700-6689348:-1	anaphase promoting complex subunit 15	Cluster001
ANAPC5	67	ENSSSCG00000009814	ENSSSCT00000010757, XM_001929287, XM_013982845	14:31259727-31306441:+1	anaphase promoting complex subunit 5	Cluster001
ANGEL2	26	ENSSSCG00000015588	ENSSSCT00000016981, ENSSSCT00000038645, ENSSSCT00000042646, ENSSSCT00000049420, ENSSSCT00000062807, XM_003130402, XM_003357587, XM_005667848, XM_013979952, XM_013979953, XM_013979955, XM_021063848, XM_021063849	9:130453922-130474918:+1	angel homolog 2	Cluster001
ANGPT2	78	ENSSSCG00000015753	ENSSSCT00000017154, XM_005671650	15:37541496-37594492:-1	angiopoietin 2	Cluster001
ANK2	265	ENSSSCG00000009125	ENSSSCT00000009992, ENSSSCT00000040372, XM_021100703	8:109316072-109519235:-1	ankyrin 2	Cluster001
ANKFY1	609	ENSSSCG00000017877	ENSSSCT00000019454, ENSSSCT00000043120, ENSSSCT00000051814, ENSSSCT00000063642, XM_021067694	12:50167960-50251790:-1	ankyrin repeat and FYVE domain containing 1	Cluster001
ANKHD1	72	ENSSSCG00000014364	ENSSSCT00000015694, ENSSSCT00000047944	2:142166314-142298097:+1	ankyrin repeat and KH domain containing 1	Cluster001
ANKIB1	320	ENSSSCG00000015314	ENSSSCT00000016687, ENSSSCT00000055638, XM_003130136, XM_005667593, XM_013979684	9:72079300-72329544:+1	ankyrin repeat and IBR domain containing 1	Cluster001
ANKRA2	589	ENSSSCG00000014070	ENSSSCT00000015370, ENSSSCT00000052867, XM_003123692	2:82698002-82715345:-1	ankyrin repeat family A member 2	Cluster001
ANKRD12	817	ENSSSCG00000003682	ENSSSCT00000004080, ENSSSCT00000036922, ENSSSCT00000053210, ENSSSCT00000056135, ENSSSCT00000061083, ENSSSCT00000063849, XM_021096063, XM_021096064, XM_021096065	6:98696616-98814747:-1	ankyrin repeat domain 12	Cluster001
ANKRD13B	431	ENSSSCG00000017793	ENSSSCT00000019365, ENSSSCT00000041477, ENSSSCT00000055540, XM_021067511, XM_021067512, XM_021067513, XM_021067514	12:45787729-45807140:+1	ankyrin repeat domain 13B	Cluster001
ANKRD13D	86	ENSSSCG00000012917	ENSSSCT00000014120, XM_013994041, XM_013994042, XM_013994043, XM_013994044, XM_013994045, XM_013994046, XM_021082767	2:5185502-5207007:-1	ankyrin repeat domain 13D	Cluster001
ANKRD17	424	ENSSSCG00000024592	ENSSSCT00000028188, ENSSSCT00000039427, ENSSSCT00000060221, XM_021100379, XM_021100380, XM_021100381, XM_021100382, XM_021100384, XM_021100385, XM_021100386, XM_021100387, XM_021100388, XM_021100389, XM_021100390, XM_021100391, XM_021100392, XM_021100393	8:69361213-69531286:-1	ankyrin repeat domain 17	Cluster001
ANKRD31	788	.	XM_021084452	.	ankyrin repeat domain 31	Cluster001
ANKRD44	1	ENSSSCG00000016074	ENSSSCT00000017501, ENSSSCT00000041974, ENSSSCT00000046158, ENSSSCT00000051756, ENSSSCT00000059190, XM_005672043, XM_013984362, XM_013984363, XM_021076232, XM_021076233, XM_021076234, XM_021076236, XM_021076237, XM_021076238	15:100868475-101211230:-1	ankyrin repeat domain 44	Cluster001
ANKRD46	161	ENSSSCG00000006065	ENSSSCT00000006655, ENSSSCT00000059187, XM_005662942, XM_013996571, XM_021088530	4:36400682-36446071:+1	ankyrin repeat domain 46	Cluster001
ANKRD50	516	ENSSSCG00000022173	ENSSSCT00000025096, ENSSSCT00000064453, XM_021101612, XM_021101614, XM_021101615	8:99782806-99828653:+1	ankyrin repeat domain 50	Cluster001
ANKRD6	462	ENSSSCG00000004322	ENSSSCT00000004778, ENSSSCT00000031111, ENSSSCT00000039423, ENSSSCT00000042924, ENSSSCT00000043370, ENSSSCT00000048502, ENSSSCT00000055894, ENSSSCT00000056510, ENSSSCT00000063190, XM_021089991, XM_021089994, XM_021089998, XM_021090003	1:57437811-57645955:+1	ankyrin repeat domain 6	Cluster001
ANP32A	387	.	XM_003121759	.	acidic nuclear phosphoprotein 32 family member A	Cluster001
AP1AR	114	.	XM_003129244, XM_003482454, XM_013978945	.	adaptor related protein complex 1 associated regulatory protein	Cluster001
AP2A2	138	ENSSSCG00000012836	ENSSSCT00000014031, XM_021082580, XM_021082581, XM_021082582	2:580191-632663:+1	adaptor related protein complex 2 alpha 2 subunit	Cluster001
AP3D1	106	ENSSSCG00000040157	ENSSSCT00000055004, XM_021084196, XM_021084197, XM_021084198	2:76428364-76474672:+1	adaptor related protein complex 3 delta 1 subunit	Cluster001
AP3M1	284	ENSSSCG00000010314	ENSSSCT00000011291, ENSSSCT00000036753, ENSSSCT00000040274, ENSSSCT00000054294, XM_005671062, XM_013983315	14:76809471-76835678:-1	adaptor related protein complex 3 mu 1 subunit	Cluster001
AP3S1	581	.	XM_021084652, XM_021084653, XM_021084654, XM_021084656, XM_021084657, XM_021084658	.	adaptor related protein complex 3 sigma 1 subunit	Cluster001
APC	257	ENSSSCG00000014207	ENSSSCT00000015525, ENSSSCT00000045270, ENSSSCT00000046118, ENSSSCT00000053067, ENSSSCT00000057827, ENSSSCT00000057845, ENSSSCT00000058870, ENSSSCT00000062928, ENSSSCT00000063550, ENSSSCT00000066290	2:116912626-117097925:-1	APC, WNT signaling pathway regulator	Cluster001
API5	30	ENSSSCG00000013285	ENSSSCT00000014509, ENSSSCT00000063970, XM_003122856, XM_005660984	2:18962271-18994240:-1	apoptosis inhibitor 5	Cluster001
APOPT1	77	.	XM_021081513	.	apoptogenic 1, mitochondrial	Cluster001
AQR	751	ENSSSCG00000004802	ENSSSCT00000005301, ENSSSCT00000040622, XM_021098271, XM_021098273	1:136121111-136236356:+1	aquarius intron-binding spliceosomal factor	Cluster001
ARCN1	103	ENSSSCG00000030053	ENSSSCT00000028599, ENSSSCT00000053716, ENSSSCT00000061951, XM_003357318	9:45862080-45898254:+1	archain 1	Cluster001
ARF1	148	.	XM_005661141, XM_005661142, XM_021077234, XM_021077235, XM_021077244, XM_021077246, XM_021077250	.	ADP ribosylation factor 1	Cluster001
ARF6	436	ENSSSCG00000005012	ENSSSCT00000005528, ENSSSCT00000058177, XM_005659939	1:179712932-179734451:+1	ADP ribosylation factor 6	Cluster001
ARFGEF1	285	ENSSSCG00000006201	ENSSSCT00000006796, ENSSSCT00000035957, XM_001928010	4:67465517-67613622:+1	ADP ribosylation factor guanine nucleotide exchange factor 1	Cluster001
ARG2	395	ENSSSCG00000002294	ENSSSCT00000002555, ENSSSCT00000033367	7:91343988-91385910:+1	arginase 2	Cluster001
ARGLU1	405	ENSSSCG00000009536	ENSSSCT00000010454, XM_001927201	11:74239414-74267421:-1	arginine and glutamate rich 1	Cluster001
ARHGAP18	40	ENSSSCG00000004205	ENSSSCT00000004646, ENSSSCT00000004647, ENSSSCT00000038797, ENSSSCT00000047609, ENSSSCT00000064357, XM_021088426, XM_021088427, XM_021088430, XM_021088437	1:33527735-33717965:+1	Rho GTPase activating protein 18	Cluster001
ARHGAP35	450	ENSSSCG00000003107	ENSSSCT00000003446, ENSSSCT00000056625, ENSSSCT00000062506, XM_021094622	6:52704367-52841807:+1	Rho GTPase activating protein 35	Cluster001
ARHGAP5	124	ENSSSCG00000001966	ENSSSCT00000002199, ENSSSCT00000028957, ENSSSCT00000039111, ENSSSCT00000060419, ENSSSCT00000065462, XM_013978128, XM_021099176, XM_021099177, XM_021099178, XM_021099179, XM_021099182, XM_021099183, XM_021099184	7:67493997-67631449:-1	Rho GTPase activating protein 5	Cluster001
ARHGDIB	285	ENSSSCG00000033337	ENSSSCT00000059811	5:57576778-57600668:+1	Rho GDP dissociation inhibitor beta	Cluster001
ARHGEF12	254	ENSSSCG00000015129	ENSSSCT00000016495, ENSSSCT00000048704, ENSSSCT00000048768, ENSSSCT00000053259, ENSSSCT00000058555, XM_013979482, XM_021062982, XM_021062983, XM_021062984	9:47475134-47621287:+1	Rho guanine nucleotide exchange factor 12	Cluster001
ARHGEF7	109	ENSSSCG00000009551	ENSSSCT00000010470, ENSSSCT00000025748, ENSSSCT00000044668, ENSSSCT00000056474, ENSSSCT00000058962, ENSSSCT00000060938, ENSSSCT00000061094, ENSSSCT00000065515, XM_021065922, XM_021065923, XM_021065924, XM_021065925, XM_021065926, XM_021065927, XM_021065929, XM_021065930, XM_021065931, XM_021065932	11:77427022-77532331:+1	Rho guanine nucleotide exchange factor 7	Cluster001
ARID1A	77	ENSSSCG00000003559	ENSSSCT00000003953, ENSSSCT00000057023, ENSSSCT00000063135, XM_021095630, XM_021095631	6:84049087-84127790:+1	AT-rich interaction domain 1A	Cluster001
ARID2	510	ENSSSCG00000030685	ENSSSCT00000030858, ENSSSCT00000049846, ENSSSCT00000063011, ENSSSCT00000064554, XM_021092987	5:76634700-76799691:+1	AT-rich interaction domain 2	Cluster001
ARID4A	762	ENSSSCG00000005073	ENSSSCT00000005590, XM_005660000, XM_021088206	1:187385395-187452537:+1	AT-rich interaction domain 4A	Cluster001
ARID4B	84	ENSSSCG00000010156	ENSSSCT00000011120, ENSSSCT00000011121, ENSSSCT00000041429, ENSSSCT00000048287, ENSSSCT00000051480, ENSSSCT00000053189, ENSSSCT00000055174, ENSSSCT00000056218, ENSSSCT00000058584, XM_021074399, XM_021074400, XM_021074401, XM_021074402	14:55924357-56108138:+1	AT-rich interaction domain 4B	Cluster001
ARL13B	315	ENSSSCG00000027571	ENSSSCT00000024264, ENSSSCT00000027056, XM_013991457, XM_013991460, XM_021070732, XM_021070733, XM_021070735	13:165828077-165910937:-1	ADP ribosylation factor like GTPase 13B	Cluster001
ARL14EP	289	ENSSSCG00000039889	ENSSSCT00000039547, ENSSSCT00000043056, XM_021083232	2:30295066-30311535:-1	ADP ribosylation factor like GTPase 14 effector protein	Cluster001
ARL3	650	ENSSSCG00000031782	ENSSSCT00000052456, ENSSSCT00000054746, ENSSSCT00000061451	14:113665272-113708313:-1	ADP ribosylation factor like GTPase 3	Cluster001
ARMC8	442	ENSSSCG00000036610	ENSSSCT00000026476, ENSSSCT00000036720, ENSSSCT00000036952, ENSSSCT00000052893, XM_021069500	13:78982605-79083809:+1	armadillo repeat containing 8	Cluster001
ARMH4	344	ENSSSCG00000005071	ENSSSCT00000005588	1:187117623-187259258:-1	armadillo-like helical domain containing 4	Cluster001
ARPC5	699	ENSSSCG00000015560	ENSSSCT00000016950	9:124837759-124848198:-1	actin related protein 2/3 complex subunit 5	Cluster001
ARX	21	ENSSSCG00000020801	ENSSSCT00000036584	X:21068564-21079524:-1	aristaless related homeobox	Cluster001
ASB7	129	ENSSSCG00000004821	ENSSSCT00000005323, XM_005659791, XM_013993233, XM_021098558	1:139191407-139240198:+1	ankyrin repeat and SOCS box containing 7	Cluster001
ASCC3	239	ENSSSCG00000004358	ENSSSCT00000004815, ENSSSCT00000004816, ENSSSCT00000058812, XM_021090356, XM_021090357, XM_021090366	1:67331948-67657114:-1	activating signal cointegrator 1 complex subunit 3	Cluster001
ASTN1	363	ENSSSCG00000015513	ENSSSCT00000016900, ENSSSCT00000026733, XM_021063682, XM_021063684, XM_021063686	9:118649151-118969124:-1	astrotactin 1	Cluster001
ASXL3	736	ENSSSCG00000003736	ENSSSCT00000004136, ENSSSCT00000056137, ENSSSCT00000064937, XM_021096220	6:117366538-117518026:+1	additional sex combs like 3, transcriptional regulator	Cluster001
ATAD2B	415	ENSSSCG00000008591	ENSSSCT00000009401, ENSSSCT00000009403, ENSSSCT00000066132, XM_021087780, XM_021087781	3:114722150-114846644:+1	ATPase family, AAA domain containing 2B	Cluster001
ATAT1	102	ENSSSCG00000024604	ENSSSCT00000024851, ENSSSCT00000035297, ENSSSCT00000036528, XM_005665744, XM_005665745, XM_021097944	7:23173461-23185458:+1	alpha tubulin acetyltransferase 1	Cluster001
ATF2	705	ENSSSCG00000038076	ENSSSCT00000017391, ENSSSCT00000039068, ENSSSCT00000047269, ENSSSCT00000063886, XM_021075925, XM_021075926	15:80984162-81091532:-1	activating transcription factor 2	Cluster001
ATF7IP	233	ENSSSCG00000000612	ENSSSCT00000000658, ENSSSCT00000022782, ENSSSCT00000039240, ENSSSCT00000039361, ENSSSCT00000051931, ENSSSCT00000052005, ENSSSCT00000052841, ENSSSCT00000061398, ENSSSCT00000063620, ENSSSCT00000064888, XM_003126462, XM_021092310, XM_021092311, XM_021092313	5:58022733-58150185:-1	activating transcription factor 7 interacting protein	Cluster001
ATP11B	3	ENSSSCG00000011772	ENSSSCT00000012884, ENSSSCT00000038416, ENSSSCT00000050824, ENSSSCT00000053777, ENSSSCT00000062766, ENSSSCT00000065991, XM_021069865, XM_021069866, XM_021069868, XM_021069869, XM_021069870, XM_021069871, XM_021069872, XM_021069873, XM_021069874, XM_021069875, XM_021069876, XM_021069877, XM_021069878, XM_021069880, XM_021069882, XM_021069883, XM_021069884	13:120727597-120873932:+1	ATPase phospholipid transporting 11B (putative)	Cluster001
ATP11C	279	ENSSSCG00000012713	ENSSSCT00000013899, ENSSSCT00000035711, ENSSSCT00000036522, ENSSSCT00000038310, ENSSSCT00000044077, ENSSSCT00000046314, ENSSSCT00000049594, ENSSSCT00000053041, ENSSSCT00000063255, ENSSSCT00000065618, XM_021080194, XM_021080196, XM_021080197, XM_021080198, XM_021080199, XM_021080201, XM_021080202	X:114394433-114574071:-1	ATPase phospholipid transporting 11C	Cluster001
ATP23	30	ENSSSCG00000000453	ENSSSCT00000000489, XM_003481644, XM_021091901, XM_021091902, XM_021091903, XM_021091904, XM_021091906, XM_021091907	5:23233854-23276036:+1	ATP23 metallopeptidase and ATP synthase assembly factor homolog	Cluster001
ATP2C1	205	ENSSSCG00000011183	ENSSSCT00000012246, XM_013990075	13:1462231-1612359:-1	ATPase secretory pathway Ca2+ transporting 1	Cluster001
ATP6V1E1	15	.	XM_003126593	.	ATPase H+ transporting V1 subunit E1	Cluster001
ATRX	833	ENSSSCG00000012434	ENSSSCT00000013595, ENSSSCT00000027012, ENSSSCT00000036526, ENSSSCT00000036604, XM_003360375, XM_021080080, XM_021080081, XM_021080082, XM_021080083, XM_021080084, XM_021080085, XM_021080086, XM_021080087, XM_021080089, XM_021080090	X:61583574-61872266:-1	ATRX, chromatin remodeler	Cluster001
ATXN3	162	.	XM_013989211	.	ataxin 3	Cluster001
AXIN2	60	ENSSSCG00000017265	ENSSSCT00000018794, ENSSSCT00000055385, XM_021066733, XM_021066734, XM_021066735, XM_021066737, XM_021066738, XM_021066739	12:12311298-12343200:-1	axin 2	Cluster001
AZIN1	473	ENSSSCG00000023873	ENSSSCT00000024569, XM_021088634, XM_021088635, XM_021088636, XM_021088637, XM_021088638	4:34242981-34254926:+1	antizyme inhibitor 1	Cluster001
B3GALNT1	255	.	XM_005652413, XM_021068551, XM_021068552, XM_021068553, XM_021068554, XM_021068555, XM_021068556, XM_021068557, XM_021068558, XM_021068559, XM_021068560, XM_021068561, XM_021068562	.	beta-1,3-N-acetylgalactosaminyltransferase 1 (globoside blood group)	Cluster001
B3GALT1	115	ENSSSCG00000034351	ENSSSCT00000049407, XM_013984220, XM_013984223, XM_021075430, XM_021075431, XM_021075432, XM_021075433, XM_021075434	15:74236415-74340060:+1	beta-1,3-galactosyltransferase 1	Cluster001
B3GALT2	189	ENSSSCG00000010800	ENSSSCT00000011816, XM_005656775	10:613586-621439:+1	beta-1,3-galactosyltransferase 2	Cluster001
B3GAT2	48	ENSSSCG00000026246	ENSSSCT00000024170, XM_003121263, XM_021089488, XM_021089491	1:50938251-51041583:-1	beta-1,3-glucuronyltransferase 2	Cluster001
B4GALNT4	139	ENSSSCG00000033780	ENSSSCT00000045389, XM_021082536, XM_021082537	2:192869-204560:+1	beta-1,4-N-acetyl-galactosaminyltransferase 4	Cluster001
B4GALT2	458	ENSSSCG00000026793	ENSSSCT00000030846, ENSSSCT00000036973, XM_021096829, XM_021096830	6:167305576-167315871:-1	beta-1,4-galactosyltransferase 2	Cluster001
B4GALT5	441	ENSSSCG00000007465	ENSSSCT00000008169, ENSSSCT00000040833	17:51257909-51334246:-1	beta-1,4-galactosyltransferase 5	Cluster001
BAMBI	40	ENSSSCG00000011014	ENSSSCT00000012056, ENSSSCT00000037175	10:40053341-40060319:+1	BMP and activin membrane bound inhibitor	Cluster001
BASP1	665	.	XM_003483806, XM_013984704	.	brain abundant membrane attached signal protein 1	Cluster001
BAZ1B	253	ENSSSCG00000027342	ENSSSCT00000030732, ENSSSCT00000050875, XM_003354497, XM_005661976, XM_021086315	3:10761474-10844544:-1	bromodomain adjacent to zinc finger domain 1B	Cluster001
BAZ2B	58	ENSSSCG00000015882	ENSSSCT00000017293, ENSSSCT00000017294, ENSSSCT00000024565, ENSSSCT00000044120, XM_021074758	15:66255010-66681077:-1	bromodomain adjacent to zinc finger domain 2B	Cluster001
BBS5	91	ENSSSCG00000015931	ENSSSCT00000017347, ENSSSCT00000063910, XM_001926348, XM_005671911	15:75852198-75874951:+1	Bardet-Biedl syndrome 5	Cluster001
BBS7	68	ENSSSCG00000009093	ENSSSCT00000009959, ENSSSCT00000009960, ENSSSCT00000037761, ENSSSCT00000065035	8:102213138-102266309:+1	Bardet-Biedl syndrome 7	Cluster001
BCCIP	27	ENSSSCG00000010743	ENSSSCT00000011755, ENSSSCT00000054388, XM_001926083	14:135131115-135143307:+1	BRCA2 and CDKN1A interacting protein	Cluster001
BCL11A	88	ENSSSCG00000008392	ENSSSCT00000009189, ENSSSCT00000039117, ENSSSCT00000046105, ENSSSCT00000059747, XM_013996120, XM_021085693, XM_021085694, XM_021085695, XM_021085696, XM_021085697, XM_021085699, XM_021085701, XM_021085702	3:81197093-81296164:+1	B-cell CLL/lymphoma 11A	Cluster001
BCL7A	498	ENSSSCG00000009801	ENSSSCT00000010743, ENSSSCT00000040072, XM_003483424, XM_021074246	14:30664596-30700039:-1	BCL tumor suppressor 7A	Cluster001
BCLAF1	620	ENSSSCG00000004163	ENSSSCT00000004602, ENSSSCT00000037556, ENSSSCT00000043883, ENSSSCT00000048439, ENSSSCT00000058049, ENSSSCT00000060649, XM_005654382, XM_005654383, XM_005654384	1:27872183-27919899:+1	BCL2 associated transcription factor 1	Cluster001
BCLAF3	406	ENSSSCG00000023334	ENSSSCT00000029969, ENSSSCT00000036170, ENSSSCT00000049332, ENSSSCT00000053769	X:16249443-16312407:-1	BCLAF1 and THRAP3 family member 3	Cluster001
BDP1	236	ENSSSCG00000016968	ENSSSCT00000018477, ENSSSCT00000039274, ENSSSCT00000048269, XM_005672527	16:47801293-47907221:+1	B double prime 1, subunit of RNA polymerase III transcription initiation factor IIIB	Cluster001
BEAN1	111	ENSSSCG00000033191	ENSSSCT00000064966	6:27176023-27215350:+1	brain expressed associated with NEDD4 1	Cluster001
BEX4	471	ENSSSCG00000022635	ENSSSCT00000030099, ENSSSCT00000039530, XM_021079943	X:84147183-84149066:+1	brain expressed X-linked 4	Cluster001
BFSP1	331	ENSSSCG00000007084	ENSSSCT00000007756, XM_013985099, XM_021077954	17:25933900-25966806:-1	beaded filament structural protein 1	Cluster001
BHLHE22	100	ENSSSCG00000006222	ENSSSCT00000006818	4:69802200-69803309:-1	basic helix-loop-helix family member e22	Cluster001
BICD2	596	ENSSSCG00000027166	ENSSSCT00000008848, ENSSSCT00000023261, ENSSSCT00000058529	3:42368445-42456789:-1	BICD cargo adaptor 2	Cluster001
BICDL1	2	ENSSSCG00000009896	ENSSSCT00000010846, ENSSSCT00000055020, ENSSSCT00000059878, ENSSSCT00000061580, XM_005670704, XM_021074227	14:40004565-40123686:+1	BICD family like cargo adaptor 1	Cluster001
BIRC6	225	ENSSSCG00000008513	ENSSSCT00000009316, XM_021087656	3:107013931-107269370:-1	baculoviral IAP repeat containing 6	Cluster001
BLMH	57	.	XM_021067523	.	bleomycin hydrolase	Cluster001
BLVRA	365	ENSSSCG00000016756	ENSSSCT00000018238, ENSSSCT00000046006, XM_021078651	18:51131584-51185446:-1	biliverdin reductase A	Cluster001
BMI1	771	.	XM_021063998, XM_021063999, XM_021064000	.	BMI1 proto-oncogene, polycomb ring finger	Cluster001
BMS1	194	ENSSSCG00000010198	ENSSSCT00000011164, ENSSSCT00000026474, ENSSSCT00000064258, XM_005670994	14:61087610-61128294:+1	BMS1, ribosome biogenesis factor	Cluster001
BNIP3L	322	ENSSSCG00000009658	ENSSSCT00000010590, ENSSSCT00000040401, ENSSSCT00000040711, ENSSSCT00000047220, XM_001927592, XM_021072217, XM_021072218	14:10318696-10345754:+1	BCL2 interacting protein 3 like	Cluster001
BOD1L1	660	ENSSSCG00000008735	ENSSSCT00000009555, ENSSSCT00000058998, XM_003128856, XM_005656496, XM_005656497	8:9194887-9254469:-1	biorientation of chromosomes in cell division 1 like 1	Cluster001
BPTF	574	ENSSSCG00000033528	ENSSSCT00000039908, ENSSSCT00000043587, ENSSSCT00000046760, ENSSSCT00000062661, XM_021068118	12:14112643-14255404:+1	bromodomain PHD finger transcription factor	Cluster001
BRAF	117	ENSSSCG00000016494	ENSSSCT00000017958, ENSSSCT00000036816, ENSSSCT00000040418, ENSSSCT00000046523, ENSSSCT00000053983, ENSSSCT00000055445, XM_005654267, XM_021078583, XM_021078585, XM_021078586, XM_021078587, XM_021078588	18:8957353-9132553:+1	B-Raf proto-oncogene, serine/threonine kinase	Cluster001
BRD1	43	ENSSSCG00000032820	ENSSSCT00000036838, ENSSSCT00000040062, ENSSSCT00000042858, ENSSSCT00000060209, XM_021091353, XM_021091354, XM_021091355, XM_021091356, XM_021091357	5:774320-808012:+1	bromodomain containing 1	Cluster001
BRD2	185	ENSSSCG00000001471	ENSSSCT00000001637, ENSSSCT00000033075, ENSSSCT00000066371, XM_013977720, XM_013977721, XM_013977722, XM_013977724, XM_021097887, XM_021097888, XM_021097889, XM_021097890, XM_021097891, XM_021097892, XM_021097893, XM_021097894, XM_021097895, XM_021097896, XM_021097897, XM_021097898, XM_021097899, XM_021097900, XM_021097901, XM_021097902, XM_021097903, XM_021097904, XM_021097905	7:25150658-25165433:+1	bromodomain containing 2	Cluster001
BRD3	528	ENSSSCG00000005749	ENSSSCT00000006321, ENSSSCT00000042641	1:273502315-273534418:-1	bromodomain containing 3	Cluster001
BRD7	575	ENSSSCG00000021644	ENSSSCT00000028421, ENSSSCT00000062214, XM_021094213, XM_021094214	6:34478012-34519664:+1	bromodomain containing 7	Cluster001
BRD9	308	ENSSSCG00000035118	ENSSSCT00000056317, ENSSSCT00000064100, ENSSSCT00000064758, XM_021077128, XM_021077129, XM_021077130, XM_021077131, XM_021077132	16:79469307-79494194:+1	bromodomain containing 9	Cluster001
BRINP2	1	ENSSSCG00000015515	ENSSSCT00000016902, ENSSSCT00000064518, XM_021063687, XM_021063688, XM_021063689, XM_021063690	9:118967937-119095474:+1	BMP/retinoic acid inducible neural specific 2	Cluster001
BRMS1L	790	ENSSSCG00000001947	ENSSSCT00000002179, ENSSSCT00000061334, XM_001926256, XM_013989042	7:64083289-64123857:-1	breast cancer metastasis-suppressor 1 like	Cluster001
BROX	49	ENSSSCG00000010836	ENSSSCT00000011855, ENSSSCT00000044579, ENSSSCT00000056725, XM_005667929, XM_013980031, XM_013980032	10:11466004-11487440:+1	BRO1 domain and CAAX motif containing	Cluster001
BRPF1	66	ENSSSCG00000011548	ENSSSCT00000012638, ENSSSCT00000028565, XM_001928385, XM_003483211, XM_005669758, XM_005669759, XM_005669760, XM_013981952, XM_021069301, XM_021069302, XM_021069303, XM_021069305, XM_021069306	13:66021325-66037445:+1	bromodomain and PHD finger containing 1	Cluster001
BRWD3	658	ENSSSCG00000025156	ENSSSCT00000031239, ENSSSCT00000033174, ENSSSCT00000040534, ENSSSCT00000045006, ENSSSCT00000058949, ENSSSCT00000062528, XM_021080763	X:64237200-64403851:-1	bromodomain and WD repeat domain containing 3	Cluster001
BTAF1	175	ENSSSCG00000010467	ENSSSCT00000011455, ENSSSCT00000027675, ENSSSCT00000029375, ENSSSCT00000047194, ENSSSCT00000065436, XM_003359291	14:103530636-103641746:+1	B-TFIID TATA-box binding protein associated factor 1	Cluster001
BTBD1	153	ENSSSCG00000001801	ENSSSCT00000002017, ENSSSCT00000037824, XM_001929165	7:51877455-51926239:+1	BTB domain containing 1	Cluster001
BTBD7	134	ENSSSCG00000002461	ENSSSCT00000002732, XM_013989219	7:114619396-114707051:-1	BTB domain containing 7	Cluster001
BTF3	316	.	XM_005661479	.	basic transcription factor 3	Cluster001
BZW2	187	ENSSSCG00000023118	ENSSSCT00000030703, ENSSSCT00000039694, ENSSSCT00000042466, ENSSSCT00000044834, ENSSSCT00000058306	9:85886158-85947430:+1	basic leucine zipper and W2 domains 2	Cluster001
C11orf58	108	ENSSSCG00000040570	ENSSSCT00000063313	2:42322008-42364536:-1	chromosome 2 C11orf58 homolog	Cluster001
C12H17orf49	10	.	XM_003131935, XM_003358237, XM_005669194, XM_005669195	.	chromosome 12 C17orf49 homolog	Cluster001
C12orf45	47	ENSSSCG00000027792	ENSSSCT00000028485, ENSSSCT00000037000, ENSSSCT00000065347	5:79545430-79575998:-1	chromosome 5 C12orf45 homolog	Cluster001
C13H21orf59	153	.	XM_003132752, XM_021070920	.	chromosome 13 C21orf59 homolog	Cluster001
C14H10orf76	71	.	XM_021072731, XM_021072732	.	chromosome 14 C10orf76 homolog	Cluster001
C15H2orf76	8	.	XM_003133285, XM_005671633, XM_021074829	.	chromosome 15 C2orf76 homolog	Cluster001
C16orf72	83	ENSSSCG00000028454	ENSSSCT00000029316	3:33626975-33655272:-1	chromosome 3 C16orf72 homolog	Cluster001
C17orf75	491	ENSSSCG00000017733	ENSSSCT00000019300, ENSSSCT00000058186	12:42611547-42627053:+1	chromosome 12 C17orf75 homolog	Cluster001
C17orf80	52	ENSSSCG00000017246	ENSSSCT00000018775, ENSSSCT00000027741, ENSSSCT00000046965, ENSSSCT00000051746, ENSSSCT00000058576, ENSSSCT00000060229	12:7710265-7727656:-1	chromosome 12 C17orf80 homolog	Cluster001
C1D	150	.	XM_003125076, XM_005662505, XM_021087427, XM_021087428, XM_021087429	.	C1D nuclear receptor corepressor	Cluster001
C1H15orf41	22	.	XM_003121624, XM_021098104, XM_021098111, XM_021098114, XM_021098122	.	chromosome 1 C15orf41 homolog	Cluster001
C1H9orf78	585	.	XM_003122220	.	chromosome 1 C9orf78 homolog	Cluster001
C1orf131	630	ENSSSCG00000010176	ENSSSCT00000011142	14:59239854-59262187:+1	chromosome 14 C1orf131 homolog	Cluster001
C1orf21	5	ENSSSCG00000015565	ENSSSCT00000016955, ENSSSCT00000063578	9:125613077-125846000:+1	chromosome 9 C1orf21 homolog	Cluster001
C1QBP	63	.	XM_021067745	.	complement C1q binding protein	Cluster001
C1QTNF4	462	ENSSSCG00000013231	ENSSSCT00000014451, ENSSSCT00000047887, XM_013994331, XM_021083074	2:15022060-15026899:+1	C1q and TNF related 4	Cluster001
C2CD2	64	ENSSSCG00000025821	ENSSSCT00000030786, XM_003358976	13:205246716-205313865:-1	C2 calcium dependent domain containing 2	Cluster001
C2CD3	87	ENSSSCG00000014835	ENSSSCT00000016187, XM_021062487	9:8394152-8512639:-1	C2 calcium dependent domain containing 3	Cluster001
C2H19orf43	5	.	XM_003123323, XM_021083727	.	chromosome 2 C19orf43 homolog	Cluster001
C2H5orf24	536	.	XM_005655017, XM_013987605	.	chromosome 2 C5orf24 homolog	Cluster001
C3H2orf49	243	.	XM_021087118, XM_021087119	.	chromosome 3 C2orf49 homolog	Cluster001
C3orf38	67	ENSSSCG00000034645	ENSSSCT00000039968, ENSSSCT00000058542, ENSSSCT00000059044	13:167790021-167803758:-1	chromosome 13 C3orf38 homolog	Cluster001
C3orf70	29	ENSSSCG00000038724	ENSSSCT00000052369	13:122958345-123058620:-1	chromosome 13 C3orf70 homolog	Cluster001
C4H1orf52	545	.	XM_001928145, XM_021090346	.	chromosome 4 C1orf52 homolog	Cluster001
C5H12orf45	67	.	XM_021091093	.	chromosome 5 C12orf45 homolog	Cluster001
C5orf24	350	ENSSSCG00000034954	ENSSSCT00000039433, ENSSSCT00000047815	2:137017027-137049441:+1	chromosome 2 C5orf24 homolog	Cluster001
C6H18orf8	3	.	XM_021096180, XM_021096181, XM_021096182	.	chromosome 6 C18orf8 homolog	Cluster001
C6H1orf123	495	.	XM_003127985	.	chromosome 6 C1orf123 homolog	Cluster001
C9H11orf57	228	.	XM_003129847, XM_005667331, XM_005667332, XM_021062781	.	chromosome 9 C11orf57 homolog	Cluster001
C9H1orf21	272	.	XM_003482739, XM_021063814, XM_021063815	.	chromosome 9 C1orf21 homolog	Cluster001
C9orf72	174	ENSSSCG00000011010	ENSSSCT00000012052, ENSSSCT00000047297, ENSSSCT00000051717, ENSSSCT00000052740	10:38389216-38415901:+1	chromosome 10 C9orf72 homolog	Cluster001
CA10	46	ENSSSCG00000023169	ENSSSCT00000027811, XM_021067240, XM_021067241, XM_021067242	12:27979325-28099500:-1	carbonic anhydrase 10	Cluster001
CAB39	271	ENSSSCG00000016266	ENSSSCT00000017712, ENSSSCT00000060071, XM_021075733, XM_021075734	15:131492570-131585105:+1	calcium binding protein 39	Cluster001
CABLES1	1	ENSSSCG00000003705	ENSSSCT00000004104, ENSSSCT00000039322, ENSSSCT00000064133, XM_021097743	6:108115886-108227744:+1	Cdk5 and Abl enzyme substrate 1	Cluster001
CACHD1	325	ENSSSCG00000004829	ENSSSCT00000005331, XM_021096540	6:147775073-148010299:-1	cache domain containing 1	Cluster001
CACNA2D3	1	ENSSSCG00000027019	ENSSSCT00000023696, ENSSSCT00000024071, ENSSSCT00000039449, ENSSSCT00000042891, ENSSSCT00000051876, ENSSSCT00000059205, XM_021068973, XM_021068974, XM_021068975, XM_021068976	13:36221920-37022885:+1	calcium voltage-gated channel auxiliary subunit alpha2delta 3	Cluster001
CACYBP	75	ENSSSCG00000015504	ENSSSCT00000016891, XM_003130321, XM_013989619, XM_013989620	9:117063990-117077436:+1	calcyclin binding protein	Cluster001
CAMK4	224	ENSSSCG00000037019	ENSSSCT00000039259, ENSSSCT00000051429, ENSSSCT00000058678, ENSSSCT00000062931, ENSSSCT00000063979, XM_013995028, XM_021084616, XM_021084617, XM_021084618, XM_021084619, XM_021084620, XM_021084621, XM_021084622	2:116001146-116229759:+1	calcium/calmodulin dependent protein kinase IV	Cluster001
CAMSAP2	429	ENSSSCG00000027314	ENSSSCT00000030669, ENSSSCT00000041321, XM_021064501	10:23275402-23357525:+1	calmodulin regulated spectrin associated protein family member 2	Cluster001
CAMSAP3	231	ENSSSCG00000013583	ENSSSCT00000014835, ENSSSCT00000044080, ENSSSCT00000050751, ENSSSCT00000053730, XM_021083908, XM_021083909, XM_021083911, XM_021083912	2:71529292-71547407:-1	calmodulin regulated spectrin associated protein family member 3	Cluster001
CAPN5	476	ENSSSCG00000014875	ENSSSCT00000016228, XM_003129679	9:11194297-11246712:+1	calpain 5	Cluster001
CAPN7	287	ENSSSCG00000030697	ENSSSCT00000022738	13:2452183-2504905:+1	calpain 7	Cluster001
CAPRIN1	837	ENSSSCG00000013305	ENSSSCT00000014531, ENSSSCT00000051606, ENSSSCT00000053740, ENSSSCT00000063553, XM_005661021	2:26809963-26875400:-1	cell cycle associated protein 1	Cluster001
CARF	44	ENSSSCG00000016117	ENSSSCT00000017548, ENSSSCT00000038096, ENSSSCT00000049286, ENSSSCT00000050182, XM_021075544, XM_021075545, XM_021075546, XM_021075547, XM_021075548, XM_021075549, XM_021075550, XM_021075552, XM_021075553, XM_021075556, XM_021075557, XM_021075558	15:106410155-106466801:+1	calcium responsive transcription factor	Cluster001
CASC1	239	ENSSSCG00000040550	ENSSSCT00000058759, ENSSSCT00000062474, ENSSSCT00000065379, XM_021092188, XM_021092189, XM_021092193, XM_021092194, XM_021092195, XM_021092196, XM_021092197, XM_021092198, XM_021092200, XM_021092201	5:48555688-48651365:+1	cancer susceptibility 1	Cluster001
CASK	757	.	XM_003360270	.	calcium/calmodulin dependent serine protein kinase	Cluster001
CASP3	559	ENSSSCG00000034012	ENSSSCT00000042090, ENSSSCT00000064876	15:45742756-45763754:-1	caspase 3	Cluster001
CASP8AP2	323	ENSSSCG00000004331	ENSSSCT00000004783, ENSSSCT00000004787, ENSSSCT00000048442, ENSSSCT00000050370, XM_005659298, XM_021090028, XM_021090036, XM_021090042, XM_021090045, XM_021090047, XM_021090053, XM_021090057, XM_021090064, XM_021090076	1:57834116-57864833:+1	caspase 8 associated protein 2	Cluster001
CAVIN4	69	ENSSSCG00000037954	ENSSSCT00000050806, ENSSSCT00000060575, XM_021066698	1:242259719-242320056:+1	caveolae associated protein 4	Cluster001
CBFA2T2	421	ENSSSCG00000027410	ENSSSCT00000027119, ENSSSCT00000030451, ENSSSCT00000063164, XM_005672844, XM_005672845, XM_021078106, XM_021078107, XM_021078108, XM_021078109	17:36990103-37150428:+1	CBFA2/RUNX1 translocation partner 2	Cluster001
CBLB	19	ENSSSCG00000022486	ENSSSCT00000023448, ENSSSCT00000031442, ENSSSCT00000052720, ENSSSCT00000058581, XM_013982478, XM_013982479, XM_021070489, XM_021070492, XM_021070493, XM_021070494, XM_021070495, XM_021070496	13:153479925-153700111:+1	Cbl proto-oncogene B	Cluster001
CBX1	198	ENSSSCG00000017529	ENSSSCT00000019083, XM_003131538, XM_013979992, XM_021067104, XM_021067105, XM_021067106, XM_021067108	12:24320573-24351052:-1	chromobox 1	Cluster001
CBX3	344	.	XM_003360191, XM_005673310, XM_005673311, XM_021078986	.	chromobox 3	Cluster001
CBX4	15	ENSSSCG00000017160	ENSSSCT00000018684, ENSSSCT00000055713	12:2521027-2527243:+1	chromobox 4	Cluster001
CBX5	64	ENSSSCG00000039191	ENSSSCT00000059441, ENSSSCT00000060765, ENSSSCT00000066141, XM_005663849, XM_021091740, XM_021091742, XM_021091743, XM_021091744	5:19446089-19484629:-1	chromobox 5	Cluster001
CCAR1	670	ENSSSCG00000010243	ENSSSCT00000011212, ENSSSCT00000058683, ENSSSCT00000063279, ENSSSCT00000065106, XM_021072496, XM_021072497, XM_021072498, XM_021072499, XM_021072500, XM_021072501, XM_021072502	14:71827631-71894754:+1	cell division cycle and apoptosis regulator 1	Cluster001
CCDC112	536	ENSSSCG00000029866	ENSSSCT00000023333, ENSSSCT00000059802, XM_021084645	2:119444287-119459542:-1	coiled-coil domain containing 112	Cluster001
CCDC124	114	ENSSSCG00000013891	ENSSSCT00000015177, ENSSSCT00000048131, XM_005654904, XM_005654905	2:59819111-59831566:-1	coiled-coil domain containing 124	Cluster001
CCDC138	9	ENSSSCG00000008135	ENSSSCT00000008912, XM_005662329, XM_005662330, XM_005662332, XM_013995876, XM_013995877, XM_021087107, XM_021087108, XM_021087109, XM_021087110	3:47470710-47523529:+1	coiled-coil domain containing 138	Cluster001
CCDC14	528	ENSSSCG00000025349	ENSSSCT00000029688, ENSSSCT00000040405, XM_021070220, XM_021070221, XM_021070222, XM_021070223, XM_021070224, XM_021070225, XM_021070226, XM_021070227, XM_021070228, XM_021070229, XM_021070230	13:136438962-136493792:+1	coiled-coil domain containing 14	Cluster001
CCDC148	132	ENSSSCG00000015876	ENSSSCT00000017287, ENSSSCT00000049912, ENSSSCT00000063743, XM_021076459, XM_021076460, XM_021076461	15:65062034-65431423:-1	coiled-coil domain containing 148	Cluster001
CCDC150	400	ENSSSCG00000016069	ENSSSCT00000017495, ENSSSCT00000017497, ENSSSCT00000023088, ENSSSCT00000037241, ENSSSCT00000063572, XM_013982277, XM_021074909, XM_021074910, XM_021074911, XM_021074913, XM_021074914, XM_021074915, XM_021074916, XM_021074917, XM_021074918, XM_021074919, XM_021074920, XM_021074921, XM_021074922, XM_021074923, XM_021074924, XM_021074925	15:100539361-100634576:+1	coiled-coil domain containing 150	Cluster001
CCDC158	158	ENSSSCG00000008983	ENSSSCT00000009840, ENSSSCT00000047712, XM_013978793, XM_021101460, XM_021101461, XM_021101462, XM_021101463, XM_021101464, XM_021101465, XM_021101466, XM_021101468	8:71985684-72089043:-1	coiled-coil domain containing 158	Cluster001
CCDC174	133	ENSSSCG00000040702	ENSSSCT00000062059	13:69898810-69918896:-1	coiled-coil domain containing 174	Cluster001
CCDC18	280	ENSSSCG00000006897	ENSSSCT00000007552, ENSSSCT00000030921, ENSSSCT00000050342, ENSSSCT00000053970, ENSSSCT00000060895, XM_021090188, XM_021090189, XM_021090190, XM_021090191, XM_021090192, XM_021090193, XM_021090194, XM_021090195, XM_021090199, XM_021090200, XM_021090201, XM_021090202	4:123902320-124008748:-1	coiled-coil domain containing 18	Cluster001
CCDC186	218	ENSSSCG00000010648	ENSSSCT00000011647, XM_001927027	14:124472676-124510771:-1	coiled-coil domain containing 186	Cluster001
CCDC25	480	ENSSSCG00000024972	ENSSSCT00000027285, ENSSSCT00000062586, XM_005657250, XM_013990270, XM_013990271, XM_013990272	14:11454864-11495087:-1	coiled-coil domain containing 25	Cluster001
CCDC30	2	.	XM_021096923	.	coiled-coil domain containing 30	Cluster001
CCDC40	28	ENSSSCG00000017158	ENSSSCT00000018682, ENSSSCT00000025111, XM_021066501, XM_021066502, XM_021066503, XM_021066504	12:2341574-2384103:-1	coiled-coil domain containing 40	Cluster001
CCDC43	90	.	XM_003131348, XM_005668755	.	coiled-coil domain containing 43	Cluster001
CCDC50	255	ENSSSCG00000036423	ENSSSCT00000045274, ENSSSCT00000050446, ENSSSCT00000055067, XM_003483296, XM_013982294, XM_013982295	13:128619230-128690649:+1	coiled-coil domain containing 50	Cluster001
CCDC62	85	ENSSSCG00000009787	ENSSSCT00000010729, ENSSSCT00000024886, ENSSSCT00000046516, ENSSSCT00000060892, XM_013982801, XM_013982802, XM_013982803, XM_021074075, XM_021074076, XM_021074077, XM_021074078, XM_021074080, XM_021074081	14:29997200-30066258:-1	coiled-coil domain containing 62	Cluster001
CCDC82	557	ENSSSCG00000014972	ENSSSCT00000016334, ENSSSCT00000037829, ENSSSCT00000047066, ENSSSCT00000053403, ENSSSCT00000054856, ENSSSCT00000059013, ENSSSCT00000063650, XM_003129800, XM_005667265, XM_013979307, XM_021062692, XM_021062694, XM_021062695, XM_021062696, XM_021062697, XM_021062698	9:28375047-28407374:-1	coiled-coil domain containing 82	Cluster001
CCDC85B	56	ENSSSCG00000012968	ENSSSCT00000014175	2:6437029-6437637:-1	coiled-coil domain containing 85B	Cluster001
CCDC88A	234	ENSSSCG00000008406	ENSSSCT00000009203, ENSSSCT00000032254, ENSSSCT00000043145, ENSSSCT00000044583, ENSSSCT00000045661, ENSSSCT00000054757, ENSSSCT00000059570, ENSSSCT00000065372, ENSSSCT00000066067, XM_021087520	3:85800142-85941860:+1	coiled-coil domain containing 88A	Cluster001
CCDC90B	706	ENSSSCG00000014903	ENSSSCT00000016258, ENSSSCT00000052993, ENSSSCT00000065129, XM_003129718, XM_013979203	9:17414356-17446992:-1	coiled-coil domain containing 90B	Cluster001
CCER2	106	.	XM_021094352, XM_021094353, XM_021094354	.	coiled-coil glutamate rich protein 2	Cluster001
CCN4	402	ENSSSCG00000005946	ENSSSCT00000006529, ENSSSCT00000047671, ENSSSCT00000060888	4:8079755-8111155:-1	cellular communication network factor 4	Cluster001
CCNB1IP1	60	ENSSSCG00000002144	ENSSSCT00000002398	7:78553783-78575344:+1	cyclin B1 interacting protein 1	Cluster001
CCNJ	57	ENSSSCG00000010502	ENSSSCT00000011491, ENSSSCT00000065340, XM_001928033, XM_005671361, XM_013983644, XM_021072646, XM_021072647, XM_021072648, XM_021072650	14:107521684-107566267:+1	cyclin J	Cluster001
CCNT2	688	ENSSSCG00000015697	ENSSSCT00000017097, XM_021075754, XM_021075756, XM_021075757, XM_021075758, XM_021075759, XM_021075760, XM_021075761, XM_021075762	15:16979672-17021248:-1	cyclin T2	Cluster001
CCSER1	168	ENSSSCG00000022986	ENSSSCT00000025293, ENSSSCT00000037713, ENSSSCT00000045416, ENSSSCT00000050302, XM_003129320, XM_021100737, XM_021100739, XM_021100740, XM_021100741, XM_021100742, XM_021100743, XM_021100744, XM_021100745, XM_021100746	8:127985766-128953392:-1	coiled-coil serine rich protein 1	Cluster001
CCT6A	221	.	XM_005662018	.	chaperonin containing TCP1 subunit 6A	Cluster001
CCT8	140	ENSSSCG00000026761	ENSSSCT00000023076, XM_003358899	13:192407979-192423368:-1	chaperonin containing TCP1 subunit 8	Cluster001
CD200	127	ENSSSCG00000027820	ENSSSCT00000024809, ENSSSCT00000043183, XM_003358809, XM_005670229, XM_005670230, XM_021070383, XM_021070384, XM_021070385	13:147465863-147522836:-1	CD200 molecule	Cluster001
CD99L2	140	ENSSSCG00000012744	ENSSSCT00000013933, ENSSSCT00000056831, XM_003135466, XM_003135467, XM_013991048, XM_013991049, XM_021080510, XM_021080511	X:122454381-122535992:-1	CD99 molecule like 2	Cluster001
CDC27	305	ENSSSCG00000017308	ENSSSCT00000018844, ENSSSCT00000046519, ENSSSCT00000054238, ENSSSCT00000058263, XM_003131307, XM_005656938, XM_005656939, XM_013989920, XM_021066795, XM_021066796, XM_021066797	12:16810859-16882371:+1	cell division cycle 27	Cluster001
CDC42	415	ENSSSCG00000003520	ENSSSCT00000003910, ENSSSCT00000033211, ENSSSCT00000034073, XM_005656039, XM_005656040	6:80035048-80090934:+1	cell division cycle 42	Cluster001
CDC42BPA	439	ENSSSCG00000010862	ENSSSCT00000011884, ENSSSCT00000038398, ENSSSCT00000039715, ENSSSCT00000043351, ENSSSCT00000052341, ENSSSCT00000054261, ENSSSCT00000057313, ENSSSCT00000058000, ENSSSCT00000064427, XM_003482782, XM_021064422, XM_021064423, XM_021064425, XM_021064428, XM_021064430, XM_021064431, XM_021064432, XM_021064433, XM_021064434, XM_021064435, XM_021064437, XM_021064438, XM_021064440	10:14649277-14940830:-1	CDC42 binding protein kinase alpha	Cluster001
CDC42EP3	699	ENSSSCG00000021359	ENSSSCT00000009292, ENSSSCT00000023650, XM_003125224, XM_003481240, XM_003481241, XM_005662620, XM_005662621, XM_005662622	3:102539223-102562389:+1	CDC42 effector protein 3	Cluster001
CDH10	661	ENSSSCG00000016802	ENSSSCT00000018292, XM_021076630, XM_021076631	16:12094710-12277315:-1	cadherin 10	Cluster001
CDH11	19	ENSSSCG00000002795	ENSSSCT00000003095, ENSSSCT00000033754, XM_021093363, XM_021093364, XM_021093365, XM_021093366	6:25782756-25933632:-1	cadherin 11	Cluster001
CDH13	206	ENSSSCG00000002684	ENSSSCT00000002977, ENSSSCT00000045679	6:4806014-5684863:-1	cadherin 13	Cluster001
CDH2	145	ENSSSCG00000003722	ENSSSCT00000004122, XM_021096205	6:112396329-112628946:-1	cadherin 2	Cluster001
CDH8	103	ENSSSCG00000040687	ENSSSCT00000040497, ENSSSCT00000063035, XM_021093975, XM_021093977, XM_021093978, XM_021093979, XM_021093980, XM_021093981	6:22924340-23353759:-1	cadherin 8	Cluster001
CDH9	416	ENSSSCG00000020845	ENSSSCT00000028848, ENSSSCT00000061511	16:13940117-14076030:-1	cadherin 9	Cluster001
CDK12	21	ENSSSCG00000017504	ENSSSCT00000019057, ENSSSCT00000040777, ENSSSCT00000053602, ENSSSCT00000057004, XM_003131505, XM_003358062, XM_005653930, XM_005653931, XM_021067051, XM_021067052, XM_021067053	12:22755956-22831356:-1	cyclin dependent kinase 12	Cluster001
CDK5R1	72	ENSSSCG00000017730	ENSSSCT00000019297, XM_021066022, XM_021066023	12:42493321-42494659:-1	cyclin dependent kinase 5 regulatory subunit 1	Cluster001
CDK8	278	ENSSSCG00000009298	ENSSSCT00000010186, ENSSSCT00000029736, ENSSSCT00000059226, XM_021065497, XM_021065498, XM_021065499, XM_021065500, XM_021065501	11:4053945-4218593:+1	cyclin dependent kinase 8	Cluster001
CDKAL1	78	ENSSSCG00000001080	ENSSSCT00000001175, ENSSSCT00000040980, ENSSSCT00000042404, ENSSSCT00000057787, ENSSSCT00000063418, XM_003128199, XM_005665616, XM_005665617, XM_005665619, XM_005665620, XM_005665623, XM_021099783, XM_021099784, XM_021099785, XM_021099786	7:15910494-16674989:+1	CDK5 regulatory subunit associated protein 1 like 1	Cluster001
CDKL2	62	ENSSSCG00000008970	ENSSSCT00000009825, ENSSSCT00000045999, XM_021101448	8:71231152-71260889:-1	cyclin dependent kinase like 2	Cluster001
CDON	83	ENSSSCG00000022504	ENSSSCT00000025358, ENSSSCT00000050376, ENSSSCT00000053678, XM_021063103, XM_021063104, XM_021063106, XM_021063108	9:53079550-53178884:-1	cell adhesion associated, oncogene regulated	Cluster001
CEBPZ	511	ENSSSCG00000008493	ENSSSCT00000009295, ENSSSCT00000051104, XM_003125229	3:102964208-102992082:+1	CCAAT/enhancer binding protein zeta	Cluster001
CELF3	173	ENSSSCG00000006618	ENSSSCT00000007252, ENSSSCT00000049625, ENSSSCT00000052166, ENSSSCT00000063688, XM_003481451, XM_013997141, XM_013997142, XM_013997143, XM_013997144	4:97513605-97528481:+1	CUGBP Elav-like family member 3	Cluster001
CENPC	454	ENSSSCG00000008921	ENSSSCT00000009769, ENSSSCT00000059921, XM_021101386	8:65238062-65315788:-1	centromere protein C	Cluster001
CENPK	431	ENSSSCG00000016946	ENSSSCT00000018454, XM_005672481, XM_021076784, XM_021076785, XM_021076786, XM_021076787	16:44042219-44080472:-1	centromere protein K	Cluster001
CEP120	452	ENSSSCG00000014239	ENSSSCT00000015559, ENSSSCT00000038553, ENSSSCT00000061703, XM_005661594, XM_013995057	2:126840263-126930236:-1	centrosomal protein 120	Cluster001
CEP128	47	ENSSSCG00000002410	ENSSSCT00000002679, ENSSSCT00000028622, ENSSSCT00000037305, ENSSSCT00000051555, ENSSSCT00000051850, XM_021099563, XM_021099564, XM_021099565, XM_021099566, XM_021099567, XM_021099568, XM_021099569, XM_021099570, XM_021099571, XM_021099573, XM_021099574, XM_021099576, XM_021099577	7:103353895-103760323:-1	centrosomal protein 128	Cluster001
CEP131	72	ENSSSCG00000017143	ENSSSCT00000018663, ENSSSCT00000052977, ENSSSCT00000065183, XM_021068068	12:1538326-1561755:+1	centrosomal protein 131	Cluster001
CEP135	452	ENSSSCG00000022283	ENSSSCT00000031478, ENSSSCT00000052897, XM_021101350, XM_021101351, XM_021101352	8:55250621-55325388:+1	centrosomal protein 135	Cluster001
CEP162	213	ENSSSCG00000004289	ENSSSCT00000004742, ENSSSCT00000038085, ENSSSCT00000057299, XM_005659266, XM_013992659, XM_013992660, XM_021089595, XM_021089607, XM_021089608	1:53329026-53442711:-1	centrosomal protein 162	Cluster001
CEP164	117	ENSSSCG00000015080	ENSSSCT00000016446, ENSSSCT00000038547, ENSSSCT00000043726, XM_021062884, XM_021062885, XM_021062886, XM_021062887, XM_021062888, XM_021062890, XM_021062891, XM_021062892, XM_021062893, XM_021062894, XM_021062895, XM_021062896, XM_021062897, XM_021062898, XM_021062899	9:44670824-44751255:+1	centrosomal protein 164	Cluster001
CEP170	614	ENSSSCG00000030502	ENSSSCT00000027065, ENSSSCT00000029631, ENSSSCT00000043311, ENSSSCT00000060436, ENSSSCT00000064593, XM_021064140, XM_021064141, XM_021064142, XM_021064143, XM_021064144, XM_021064145, XM_021064146, XM_021064147, XM_021064148, XM_021064149, XM_021064150, XM_021064151, XM_021064152, XM_021064153, XM_021064154, XM_021064155, XM_021064156, XM_021064157, XM_021064158, XM_021064159, XM_021064160, XM_02…	10:16068528-16191742:-1	centrosomal protein 170	Cluster001
CEP19	610	ENSSSCG00000021918	ENSSSCT00000023388, XM_003358761, XM_005670112, XM_005670113, XM_005670115, XM_005670116, XM_005670117, XM_021070140	13:133420017-133427544:+1	centrosomal protein 19	Cluster001
CEP290	663	ENSSSCG00000000926	ENSSSCT00000001011, ENSSSCT00000038054, ENSSSCT00000041889, ENSSSCT00000049055, ENSSSCT00000052762, ENSSSCT00000061535, ENSSSCT00000065935, XM_021092777	5:94383946-94469001:+1	centrosomal protein 290	Cluster001
CEP295	412	ENSSSCG00000014946	ENSSSCT00000016304, ENSSSCT00000047165, ENSSSCT00000053790, ENSSSCT00000054502, ENSSSCT00000061483, ENSSSCT00000065668, XM_021062639	9:26103132-26155065:+1	centrosomal protein 295	Cluster001
CEP350	151	ENSSSCG00000015531	ENSSSCT00000016919, XM_021063750	9:121607078-121741125:+1	centrosomal protein 350	Cluster001
CEP44	114	ENSSSCG00000032475	ENSSSCT00000010636, ENSSSCT00000039898, ENSSSCT00000056509, ENSSSCT00000062426, ENSSSCT00000066144, XM_021074194, XM_021074195, XM_021074196, XM_021074197, XM_021074198, XM_021074199, XM_021074200, XM_021074203	14:15875790-15896341:-1	centrosomal protein 44	Cluster001
CEP57	372	.	XM_021062689, XM_021062690	.	centrosomal protein 57	Cluster001
CEP63	196	ENSSSCG00000011645	ENSSSCT00000012746, ENSSSCT00000024754, ENSSSCT00000038688, ENSSSCT00000042514, ENSSSCT00000044702, ENSSSCT00000054935, ENSSSCT00000064932, XM_005669856, XM_005669857, XM_005669858, XM_005669859, XM_013982034, XM_013982035, XM_013982037, XM_021069474, XM_021069475, XM_021069476, XM_021069477, XM_021069478	13:75605685-75711051:+1	centrosomal protein 63	Cluster001
CEP85L	461	ENSSSCG00000004249	ENSSSCT00000004696, XM_003121248	1:43392975-43559423:+1	centrosomal protein 85 like	Cluster001
CEP89	26	ENSSSCG00000025152	ENSSSCT00000027888, ENSSSCT00000052843, ENSSSCT00000056669, XM_021094278, XM_021094279, XM_021094280, XM_021094281, XM_021094282, XM_021094285	6:42733678-42815281:-1	centrosomal protein 89	Cluster001
CEP95	166	ENSSSCG00000028925	ENSSSCT00000030273, ENSSSCT00000046447, XM_021066755, XM_021066756, XM_021066757	12:14507846-14572477:-1	centrosomal protein 95	Cluster001
CERS6	263	ENSSSCG00000032715	ENSSSCT00000058572, ENSSSCT00000060525, XM_021075469, XM_021075470, XM_021075471	15:74927130-75261557:+1	ceramide synthase 6	Cluster001
CFAP221	40	ENSSSCG00000015741	ENSSSCT00000017141, XM_021075445, XM_021075446, XM_021075447	15:31599673-31686108:-1	cilia and flagella associated protein 221	Cluster001
CFAP97	38	ENSSSCG00000015791	ENSSSCT00000017194, XM_021075563	15:46210832-46248114:-1	cilia and flagella associated protein 97	Cluster001
CFDP1	321	ENSSSCG00000033842	ENSSSCT00000038268, ENSSSCT00000063208, XM_021093775	6:12223696-12354403:+1	craniofacial development protein 1	Cluster001
CGGBP1	51	ENSSSCG00000032182	ENSSSCT00000037851, XM_021070750, XM_021070751, XM_021070752	13:167896048-167900808:+1	CGG triplet repeat binding protein 1	Cluster001
CHD1	72	ENSSSCG00000014177	ENSSSCT00000015489, ENSSSCT00000022643, ENSSSCT00000032432, ENSSSCT00000056887, XM_021085397, XM_021085398, XM_021085399, XM_021085400	2:105113163-105203206:-1	chromodomain helicase DNA binding protein 1	Cluster001
CHD2	159	ENSSSCG00000002266	ENSSSCT00000002524, ENSSSCT00000025402, ENSSSCT00000027293, ENSSSCT00000037867, ENSSSCT00000043688, ENSSSCT00000047171, ENSSSCT00000061746, ENSSSCT00000063923, XM_013978270, XM_013978275, XM_021099369, XM_021099370	7:85980766-86107778:-1	chromodomain helicase DNA binding protein 2	Cluster001
CHD3	684	ENSSSCG00000021363	ENSSSCT00000019543, ENSSSCT00000019548, ENSSSCT00000037530, ENSSSCT00000041969, ENSSSCT00000042642, ENSSSCT00000049398, ENSSSCT00000050125, ENSSSCT00000052611, ENSSSCT00000064898, XM_021067835, XM_021067836, XM_021067841, XM_021067842, XM_021067843, XM_021067844, XM_021067845, XM_021067846	12:53097729-53165653:+1	chromodomain helicase DNA binding protein 3	Cluster001
CHD8	574	ENSSSCG00000002127	ENSSSCT00000002379, ENSSSCT00000052517, ENSSSCT00000056768, XM_003482263, XM_013978247, XM_013978249, XM_013978251, XM_013978252, XM_021099292, XM_021099293, XM_021099294, XM_021099295, XM_021099296, XM_021099297, XM_021099298, XM_021099300, XM_021099301, XM_021099302	7:77719517-77780205:+1	chromodomain helicase DNA binding protein 8	Cluster001
CHD9	188	ENSSSCG00000033591	ENSSSCT00000040052, XM_021094174	6:31832493-31979935:-1	chromodomain helicase DNA binding protein 9	Cluster001
CHIC2	15	ENSSSCG00000032645	ENSSSCT00000062221, XM_003128983	8:40790992-40846666:-1	cysteine rich hydrophobic domain 2	Cluster001
CHL1	602	ENSSSCG00000011524	ENSSSCT00000012612, ENSSSCT00000012613, ENSSSCT00000038210, ENSSSCT00000045572, ENSSSCT00000046468, ENSSSCT00000051785, ENSSSCT00000053053, ENSSSCT00000059267, ENSSSCT00000063183, XM_013981901, XM_013981903, XM_021069241, XM_021069242, XM_021069243, XM_021069246, XM_021069247, XM_021069248, XM_021069249, XM_021069250, XM_021069251, XM_021069252, XM_021069253, XM_021069258, XM_021069260, XM_021069…	13:56804304-57034184:+1	cell adhesion molecule L1 like	Cluster001
CHML	498	ENSSSCG00000031212	ENSSSCT00000041144	10:11835585-11845808:+1	CHM like, Rab escort protein 2	Cluster001
CHMP2B	56	ENSSSCG00000011997	ENSSSCT00000013128, ENSSSCT00000046434, XM_013990175, XM_013990176	13:168531817-168569669:-1	charged multivesicular body protein 2B	Cluster001
CHSY1	234	ENSSSCG00000004825	ENSSSCT00000005327, ENSSSCT00000037748, ENSSSCT00000048747	1:139730724-139804458:-1	chondroitin sulfate synthase 1	Cluster001
CHUK	40	ENSSSCG00000010548	ENSSSCT00000011540	14:111312022-111351669:-1	conserved helix-loop-helix ubiquitous kinase	Cluster001
CIR1	10	ENSSSCG00000027516	ENSSSCT00000022567	15:80338283-80375686:-1	corepressor interacting with RBPJ, 1	Cluster001
CKAP5	167	ENSSSCG00000013249	ENSSSCT00000014469, ENSSSCT00000030061, ENSSSCT00000039211, ENSSSCT00000053718, ENSSSCT00000058317, ENSSSCT00000061825, ENSSSCT00000063810, XM_013994362, XM_021085232, XM_021085233, XM_021085234, XM_021085235, XM_021085236	2:15680787-15792633:+1	cytoskeleton associated protein 5	Cluster001
CLASP1	410	ENSSSCG00000039157	ENSSSCT00000017131, ENSSSCT00000024092, ENSSSCT00000040879, ENSSSCT00000042638, ENSSSCT00000060889, XM_021075147, XM_021075148, XM_021075150, XM_021075151, XM_021075152, XM_021075153, XM_021075154, XM_021075155, XM_021075156, XM_021075157, XM_021075158, XM_021075159, XM_021075161, XM_021075162, XM_021075163, XM_021075164, XM_021075165, XM_021075166, XM_021075167, XM_021075168, XM_021075169, XM_02…	15:29782544-30042725:+1	cytoplasmic linker associated protein 1	Cluster001
CLINT1	398	ENSSSCG00000017047	ENSSSCT00000018560, ENSSSCT00000047716, ENSSSCT00000060942, XM_021076893, XM_021076894	16:65497232-65555313:+1	clathrin interactor 1	Cluster001
CLIP1	264	ENSSSCG00000009793	ENSSSCT00000010735, ENSSSCT00000042586, ENSSSCT00000047921, ENSSSCT00000048736, ENSSSCT00000054593, ENSSSCT00000054885, ENSSSCT00000056987, ENSSSCT00000059606, ENSSSCT00000059890, XM_021072958, XM_021072959, XM_021072961, XM_021072962, XM_021072963, XM_021072964, XM_021072965, XM_021072966, XM_021072967, XM_021072968, XM_021072969, XM_021072970, XM_021072972, XM_021072973, XM_021072974, XM_021072…	14:30320344-30469180:+1	CAP-Gly domain containing linker protein 1	Cluster001
CLK1	82	ENSSSCG00000016095	ENSSSCT00000017523, ENSSSCT00000017524, XM_021074508	15:104553430-104562353:-1	CDC like kinase 1	Cluster001
CLK4	317	ENSSSCG00000014028	ENSSSCT00000015323, ENSSSCT00000039001, XM_003123650, XM_005654961, XM_005654962, XM_021084351, XM_021084352, XM_021084353, XM_021084354, XM_021084355, XM_021084356	2:79729482-79752939:+1	CDC like kinase 4	Cluster001
CLMP	425	ENSSSCG00000022961	ENSSSCT00000025556, XM_021063023, XM_021063024, XM_021063025	9:49989988-50093373:-1	CXADR like membrane protein	Cluster001
CLSTN2	564	ENSSSCG00000011666	ENSSSCT00000012771, ENSSSCT00000036993, XM_021071127	13:81298222-81449749:+1	calsyntenin 2	Cluster001
CMPK1	544	.	XM_003128011	.	cytidine/uridine monophosphate kinase 1	Cluster001
CNOT1	170	ENSSSCG00000002799	ENSSSCT00000003099, ENSSSCT00000023952, ENSSSCT00000052383, ENSSSCT00000055198, ENSSSCT00000060693, ENSSSCT00000062805, XM_021093953, XM_021093954, XM_021093955, XM_021093956, XM_021093957, XM_021093958, XM_021093959, XM_021093960, XM_021093962, XM_021093963, XM_021093964, XM_021093965, XM_021093966	6:20271594-20372920:-1	CCR4-NOT transcription complex subunit 1	Cluster001
CNOT10	127	ENSSSCG00000032220	ENSSSCT00000038047, ENSSSCT00000045420, ENSSSCT00000048586, ENSSSCT00000054328, ENSSSCT00000056741, XM_021071543, XM_021071544, XM_021071545, XM_021071546, XM_021071548, XM_021071549, XM_021071550, XM_021071551	13:18649726-18731168:+1	CCR4-NOT transcription complex subunit 10	Cluster001
CNOT2	540	ENSSSCG00000000502	ENSSSCT00000000541, ENSSSCT00000040735, ENSSSCT00000046336, ENSSSCT00000049259, ENSSSCT00000055525, ENSSSCT00000061741, ENSSSCT00000063368, ENSSSCT00000064126	5:34426399-34550088:+1	CCR4-NOT transcription complex subunit 2	Cluster001
CNOT4	44	ENSSSCG00000021354	ENSSSCT00000017996, ENSSSCT00000029334, ENSSSCT00000043394, ENSSSCT00000046643, ENSSSCT00000053462, XM_021078768, XM_021078769, XM_021078770, XM_021078772, XM_021078773	18:13821546-14006761:+1	CCR4-NOT transcription complex subunit 4	Cluster001
CNOT6	255	ENSSSCG00000014009	ENSSSCT00000015302, ENSSSCT00000044313, ENSSSCT00000047369, XM_003123627, XM_013994856, XM_013994859, XM_021084315	2:78130842-78202504:-1	CCR4-NOT transcription complex subunit 6	Cluster001
CNOT6L	43	ENSSSCG00000008989	ENSSSCT00000009846, ENSSSCT00000040815, ENSSSCT00000041786, ENSSSCT00000051409, ENSSSCT00000056702, XM_021100608, XM_021100609, XM_021100612, XM_021100613	8:73194478-73305308:-1	CCR4-NOT transcription complex subunit 6 like	Cluster001
CNOT7	300	ENSSSCG00000006983	ENSSSCT00000007648, ENSSSCT00000007651, ENSSSCT00000038577, ENSSSCT00000042803, XM_003483868, XM_005672641, XM_013984984, XM_021078072	17:4926156-4949607:-1	CCR4-NOT transcription complex subunit 7	Cluster001
CNOT8	198	ENSSSCG00000017067	ENSSSCT00000018582, ENSSSCT00000052940, XM_003134120, XM_013984900, XM_013984901, XM_021076703	16:68329793-68350260:-1	CCR4-NOT transcription complex subunit 8	Cluster001
CNOT9	346	ENSSSCG00000016193	ENSSSCT00000017634, ENSSSCT00000042804, ENSSSCT00000057002, ENSSSCT00000059797, XM_001925220	15:120590302-120655776:+1	CCR4-NOT transcription complex subunit 9	Cluster001
CNRIP1	100	ENSSSCG00000008349	ENSSSCT00000009143, XM_003481199	3:73939481-73963734:+1	cannabinoid receptor interacting protein 1	Cluster001
CNTN1	168	ENSSSCG00000000789	ENSSSCT00000000855, ENSSSCT00000034945, ENSSSCT00000036262, ENSSSCT00000041563, ENSSSCT00000048567, ENSSSCT00000055190, ENSSSCT00000064317, XM_003355617, XM_013997945, XM_021092535, XM_021092537	5:72168532-72495728:+1	contactin 1	Cluster001
CNTN5	461	.	XM_003129801, XM_021102337	.	contactin 5	Cluster001
COL4A4	412	ENSSSCG00000016244	ENSSSCT00000017688, ENSSSCT00000039391, ENSSSCT00000052450, ENSSSCT00000059827, ENSSSCT00000063167, ENSSSCT00000064014, XM_021075271	15:128476257-128612351:-1	collagen type IV alpha 4 chain	Cluster001
COMMD2	466	ENSSSCG00000011705	ENSSSCT00000012815, XM_003132482	13:89962615-90013830:-1	COMM domain containing 2	Cluster001
COMMD3	44	ENSSSCG00000011082	ENSSSCT00000012129, ENSSSCT00000062358, XM_005668159	10:52597117-52601733:-1	COMM domain containing 3	Cluster001
COPB2	132	ENSSSCG00000011662	ENSSSCT00000012767, ENSSSCT00000039901, ENSSSCT00000041279, ENSSSCT00000065493, XM_005669884, XM_021069531	13:80220466-80264797:-1	coatomer protein complex subunit beta 2	Cluster001
COPS4	334	.	XM_005656564, XM_013989411, XM_013989412, XM_021100266	.	COP9 signalosome subunit 4	Cluster001
CORO1A	26	ENSSSCG00000038055	ENSSSCT00000031067, ENSSSCT00000046308, ENSSSCT00000048124, ENSSSCT00000050863, XM_021088028, XM_021088029	3:18336808-18347016:+1	coronin 1A	Cluster001
CORO1C	38	ENSSSCG00000009944	ENSSSCT00000010896, ENSSSCT00000031523, ENSSSCT00000057469, XM_001929345, XM_005670752	14:42062365-42145124:+1	coronin 1C	Cluster001
CORO2A	40	ENSSSCG00000005375	ENSSSCT00000005915, ENSSSCT00000057265	1:239945893-240000961:-1	coronin 2A	Cluster001
CPEB4	90	ENSSSCG00000016981	ENSSSCT00000018491, ENSSSCT00000053922, ENSSSCT00000056956, ENSSSCT00000059764, ENSSSCT00000065962, XM_005657623, XM_005657625	16:50430348-50499115:-1	cytoplasmic polyadenylation element binding protein 4	Cluster001
CPLANE1	278	ENSSSCG00000016843	ENSSSCT00000018340, ENSSSCT00000047199, ENSSSCT00000056694, ENSSSCT00000060439, ENSSSCT00000065360	16:22379885-22497499:-1	ciliogenesis and planar polarity effector 1	Cluster001
CPNE8	134	ENSSSCG00000000778	ENSSSCT00000028240, XM_021092523, XM_021092524	5:70394576-70659819:-1	copine 8	Cluster001
CPSF1	160	ENSSSCG00000005906	ENSSSCT00000006486, ENSSSCT00000033207, XM_021090408	4:383004-393660:+1	cleavage and polyadenylation specific factor 1	Cluster001
CPSF6	213	ENSSSCG00000038031	ENSSSCT00000039379, ENSSSCT00000041371, ENSSSCT00000053818, ENSSSCT00000055283, ENSSSCT00000064622, XM_021090899, XM_021090900, XM_021090901, XM_021090903, XM_021090904, XM_021090905	5:33501353-33559987:+1	cleavage and polyadenylation specific factor 6	Cluster001
CRCP	450	.	XM_021086359	.	CGRP receptor component	Cluster001
CREB1	735	ENSSSCG00000034395	ENSSSCT00000039485, ENSSSCT00000040624, ENSSSCT00000045029, ENSSSCT00000051771, ENSSSCT00000063875, XM_021075304, XM_021075308, XM_021075309, XM_021075310, XM_021075311	15:110705580-110772401:+1	cAMP responsive element binding protein 1	Cluster001
CRIP2	310	ENSSSCG00000038713	ENSSSCT00000042603, ENSSSCT00000056616, XM_021081649	AEMK02000452.1:3499325-3504408:+1	cysteine rich protein 2	Cluster001
CRMP1	522	ENSSSCG00000022896	ENSSSCT00000026171, ENSSSCT00000030783, ENSSSCT00000037947, ENSSSCT00000064701, XM_021100983	8:4733329-4805890:+1	collapsin response mediator protein 1	Cluster001
CSDE1	85	ENSSSCG00000006752	ENSSSCT00000007397, ENSSSCT00000044302, ENSSSCT00000048448, ENSSSCT00000056866, ENSSSCT00000064093, XM_005655415, XM_005655416, XM_005655417, XM_021090004, XM_021090005	4:105804587-105845992:+1	cold shock domain containing E1	Cluster001
CSE1L	367	ENSSSCG00000025534	ENSSSCT00000025703, ENSSSCT00000026255, ENSSSCT00000054979	17:50744908-50797553:+1	chromosome segregation 1 like	Cluster001
CSGALNACT2	263	ENSSSCG00000010200	ENSSSCT00000011166, ENSSSCT00000054679, ENSSSCT00000060603, XM_001926417, XM_021072397, XM_021072398, XM_021072399, XM_021072401, XM_021072402, XM_021072403, XM_021072404	14:61371454-61415843:+1	chondroitin sulfate N-acetylgalactosaminyltransferase 2	Cluster001
CSMD1	153	ENSSSCG00000015748	ENSSSCT00000017148, XM_021075826	15:34364759-35022971:-1	CUB and Sushi multiple domains 1	Cluster001
CSMD3	419	ENSSSCG00000031031	ENSSSCT00000032782, ENSSSCT00000037811, ENSSSCT00000048043, ENSSSCT00000049632, ENSSSCT00000060908, XM_021090582, XM_021090583, XM_021090584, XM_021090585, XM_021090586, XM_021090587	4:24647837-25869003:+1	CUB and Sushi multiple domains 3	Cluster001
CSNK1A1	509	.	XM_003124088, XM_003354351, XM_005661799, XM_005661801, XM_021085007	.	casein kinase 1 alpha 1	Cluster001
CSNK1G1	581	ENSSSCG00000004558	ENSSSCT00000005035, ENSSSCT00000046925, ENSSSCT00000060507, ENSSSCT00000063162, XM_005659506, XM_021093855, XM_021093872	1:107690006-107884050:+1	casein kinase 1 gamma 1	Cluster001
CSNK1G2	1	ENSSSCG00000013445	ENSSSCT00000014689, XM_021084210	2:76573985-76609575:-1	casein kinase 1 gamma 2	Cluster001
CSNK1G3	492	ENSSSCG00000014240	ENSSSCT00000015560, ENSSSCT00000049569, ENSSSCT00000058378, ENSSSCT00000064332, XM_021084688, XM_021084690, XM_021084691, XM_021084692, XM_021084693, XM_021084694, XM_021084695, XM_021084696, XM_021084697, XM_021084698, XM_021084699, XM_021084700, XM_021084701	2:127017026-127130631:+1	casein kinase 1 gamma 3	Cluster001
CSNK2A1	162	.	XM_003134359, XM_005672820, XM_021078192	.	casein kinase 2 alpha 1	Cluster001
CSRNP3	222	ENSSSCG00000015906	ENSSSCT00000017319, ENSSSCT00000038956, ENSSSCT00000041403, ENSSSCT00000059622, ENSSSCT00000063434, XM_005671893, XM_021076406	15:72018645-72232831:+1	cysteine and serine rich nuclear protein 3	Cluster001
CSTF1	21	ENSSSCG00000007494	ENSSSCT00000008203, ENSSSCT00000039227, ENSSSCT00000065541, XM_005673029, XM_005673030, XM_021077196	17:56972241-56985854:+1	cleavage stimulation factor subunit 1	Cluster001
CSTF2T	12	ENSSSCG00000010430	ENSSSCT00000011415, XM_005671248	14:98105772-98110358:+1	cleavage stimulation factor subunit 2 tau variant	Cluster001
CSTF3	140	ENSSSCG00000040954	ENSSSCT00000038062	2:27780195-27849866:+1	cleavage stimulation factor subunit 3	Cluster001
CTBP1	118	ENSSSCG00000031302	ENSSSCT00000038177, ENSSSCT00000038743, ENSSSCT00000050400, ENSSSCT00000056455, XM_021100863, XM_021100864, XM_021100866, XM_021100867, XM_021100868, XM_021100869, XM_021100870, XM_021100871, XM_021100872, XM_021100873, XM_021100874, XM_021100875	8:474985-496331:-1	C-terminal binding protein 1	Cluster001
CTCF	343	ENSSSCG00000024253	ENSSSCT00000028950, ENSSSCT00000030108, ENSSSCT00000032351, ENSSSCT00000038973, ENSSSCT00000065407, XM_021093369, XM_021093370, XM_021093371, XM_021093372, XM_021093373	6:28195326-28261009:+1	CCCTC-binding factor	Cluster001
CTDSPL2	596	ENSSSCG00000035827	ENSSSCT00000048521, ENSSSCT00000063792, XM_021096494, XM_021096504, XM_021096513, XM_021096524, XM_021096535	1:127028849-127125410:-1	CTD small phosphatase like 2	Cluster001
CTTN	192	ENSSSCG00000031769	ENSSSCT00000042151, ENSSSCT00000046382, ENSSSCT00000053255, ENSSSCT00000054289, XM_021082647, XM_021082648, XM_021082650, XM_021082651, XM_021082652, XM_021082653, XM_021082654, XM_021082655, XM_021082657, XM_021082658, XM_021082659	2:3031103-3060855:-1	cortactin	Cluster001
CTTNBP2NL	172	ENSSSCG00000006781	ENSSSCT00000007427, ENSSSCT00000048948, ENSSSCT00000050221, ENSSSCT00000061085, XM_003125850, XM_013988148, XM_021090742	4:107956714-108013647:-1	CTTNBP2 N-terminal like	Cluster001
CUL5	439	ENSSSCG00000029198	ENSSSCT00000029949, ENSSSCT00000058652, XM_005667298, XM_021062739	9:36419801-36507848:+1	cullin 5	Cluster001
CWC22	563	ENSSSCG00000016008	ENSSSCT00000017430, XM_003133514, XM_005671989, XM_013984315	15:85542295-85605901:-1	CWC22 spliceosome associated protein homolog	Cluster001
CWC27	468	ENSSSCG00000016942	ENSSSCT00000018450, ENSSSCT00000044880, XM_021076543, XM_021076544	16:43345584-43593474:+1	CWC27 spliceosome associated protein homolog	Cluster001
CWF19L2	34	ENSSSCG00000028201	ENSSSCT00000026318, ENSSSCT00000041120, ENSSSCT00000057293, XM_021101972	9:35967200-36059937:-1	CWF19 like 2, cell cycle control (S. pombe)	Cluster001
CXHXorf23	384	.	XM_005673485, XM_013985984, XM_013985985, XM_021080781, XM_021080782, XM_021080783, XM_021080784, XM_021080785, XM_021080786, XM_021080787, XM_021080788	.	chromosome X CXorf23 homolog	Cluster001
CXHXorf38	26	.	XM_003135023, XM_003135024	.	chromosome X CXorf38 homolog	Cluster001
CYP7B1	1	ENSSSCG00000022092	ENSSSCT00000006817, ENSSSCT00000031830, ENSSSCT00000048637, ENSSSCT00000061005	4:69615559-69806496:+1	25-hydroxycholesterol 7-alpha-hydroxylase-like	Cluster001
CYTH3	498	ENSSSCG00000034768	ENSSSCT00000042058, ENSSSCT00000062816, XM_021086079, XM_021086080	3:4900570-5002194:+1	cytohesin 3	Cluster001
DAAM1	834	ENSSSCG00000005078	ENSSSCT00000005597, ENSSSCT00000038913, ENSSSCT00000045882, XM_021102688	1:188335353-188511087:+1	dishevelled associated activator of morphogenesis 1	Cluster001
DAB1	297	ENSSSCG00000003833	ENSSSCT00000004242, ENSSSCT00000004243, ENSSSCT00000044139, ENSSSCT00000051368, ENSSSCT00000061588, XM_021093134, XM_021093135, XM_021093137, XM_021093138, XM_021093139, XM_021093140, XM_021093141, XM_021093142, XM_021093143, XM_021093144, XM_021093145, XM_021093146, XM_021093148, XM_021093150, XM_021093151, XM_021093154, XM_021093155, XM_021093156, XM_021093157, XM_021093158, XM_021093160, XM_02…	6:154936452-155374399:+1	DAB1, reelin adaptor protein	Cluster001
DACT1	231	ENSSSCG00000031856	ENSSSCT00000043047	1:187719489-187728421:+1	dishevelled binding antagonist of beta catenin 1	Cluster001
DAZAP1	199	ENSSSCG00000022528	ENSSSCT00000023438, ENSSSCT00000051975, XM_005661387, XM_005661388	2:77048896-77070780:-1	DAZ associated protein 1	Cluster001
DBN1	523	ENSSSCG00000040706	ENSSSCT00000043160, ENSSSCT00000057028, ENSSSCT00000065141, XM_021084367, XM_021084368, XM_021084369, XM_021084370	2:80480859-80496873:+1	drebrin 1	Cluster001
DCAF1	108	ENSSSCG00000011417	ENSSSCT00000012497, ENSSSCT00000059034, ENSSSCT00000064016, ENSSSCT00000066208, XM_021068846, XM_021068847, XM_021068848, XM_021068849	13:33670979-33750913:-1	DDB1 and CUL4 associated factor 1	Cluster001
DCLK2	18	ENSSSCG00000009023	ENSSSCT00000009882, ENSSSCT00000050076, ENSSSCT00000058865, ENSSSCT00000063898, XM_021100642, XM_021100645, XM_021100647, XM_021100649, XM_021100650	8:78681456-78854848:-1	doublecortin like kinase 2	Cluster001
DCP1A	118	ENSSSCG00000022616	ENSSSCT00000023022, XM_021068463	13:35392610-35455743:-1	decapping mRNA 1A	Cluster001
DCUN1D1	742	ENSSSCG00000022783	ENSSSCT00000025068, ENSSSCT00000040972, XM_003358695, XM_021069885	13:120912795-120950738:-1	defective in cullin neddylation 1 domain containing 1	Cluster001
DCUN1D2	114	ENSSSCG00000026536	ENSSSCT00000028205, ENSSSCT00000038155, ENSSSCT00000043152, ENSSSCT00000050728, ENSSSCT00000056466, ENSSSCT00000057065, ENSSSCT00000064402, XM_013978966, XM_013978981, XM_013978986, XM_013978992, XM_021065976, XM_021065977, XM_021065978, XM_021065980, XM_021065981, XM_021065982	11:78679417-78708937:-1	defective in cullin neddylation 1 domain containing 2	Cluster001
DCUN1D5	7	ENSSSCG00000014989	ENSSSCT00000016352, ENSSSCT00000040375, ENSSSCT00000043965, ENSSSCT00000049928, XM_021062713, XM_021062714	9:33676866-33707634:-1	defective in cullin neddylation 1 domain containing 5	Cluster001
DCX	504	ENSSSCG00000012585	ENSSSCT00000013764, ENSSSCT00000034128, ENSSSCT00000035414, XM_005673830, XM_005673831, XM_013986332, XM_013986334, XM_013986335, XM_013986336, XM_013986338, XM_013986339, XM_021080436	X:91323817-91444294:-1	doublecortin	Cluster001
DDX10	188	.	XM_021062753	.	DEAD-box helicase 10	Cluster001
DDX20	281	ENSSSCG00000006783	ENSSSCT00000007430, ENSSSCT00000047917, ENSSSCT00000049104, XM_001928544, XM_021090025, XM_021090026	4:108623954-108652650:-1	DEAD-box helicase 20	Cluster001
DDX21	610	ENSSSCG00000010247	ENSSSCT00000011217	14:72040083-72061392:+1	DExD-box helicase 21	Cluster001
DDX27	43	ENSSSCG00000022915	ENSSSCT00000025578, ENSSSCT00000028964, XM_021077494	17:50903198-50923489:+1	DEAD-box helicase 27	Cluster001
DDX42	588	ENSSSCG00000017289	ENSSSCT00000018821, ENSSSCT00000037329, ENSSSCT00000048234, XM_021066770	12:15114200-15165296:-1	DEAD-box helicase 42	Cluster001
DDX46	531	ENSSSCG00000026644	ENSSSCT00000027801, XM_005655007, XM_021079949	2:136972507-137030324:+1	DEAD-box helicase 46	Cluster001
DDX5	456	ENSSSCG00000032092	ENSSSCT00000038465, ENSSSCT00000044670, ENSSSCT00000049450, ENSSSCT00000057534, ENSSSCT00000058299, ENSSSCT00000065017, ENSSSCT00000065237, XM_021066758, XM_021066760, XM_021066761	12:14571687-14582970:+1	DEAD-box helicase 5	Cluster001
DDX52	97	ENSSSCG00000021275	ENSSSCT00000024730	12:39072312-39095454:-1	DExD-box helicase 52	Cluster001
DDX6	191	ENSSSCG00000015097	ENSSSCT00000016463, ENSSSCT00000043421, ENSSSCT00000054132, ENSSSCT00000058313, ENSSSCT00000062639, ENSSSCT00000066230, XM_003129914, XM_005667408, XM_005667409, XM_005667410, XM_013979454, XM_013979455, XM_021062947	9:46025445-46063836:-1	DEAD-box helicase 6	Cluster001
DENND5B	309	ENSSSCG00000022636	ENSSSCT00000024435, ENSSSCT00000027035, ENSSSCT00000029878, ENSSSCT00000058288, ENSSSCT00000064369, XM_021092091, XM_021092093, XM_021092094, XM_021092096	5:42642896-42867359:+1	DENN domain containing 5B	Cluster001
DGKD	402	ENSSSCG00000009432	ENSSSCT00000010339, ENSSSCT00000017753, ENSSSCT00000042876, ENSSSCT00000043423, XM_021075022, XM_021075023, XM_021075024, XM_021075027, XM_021075028, XM_021075029	15:133749344-133870130:+1	diacylglycerol kinase delta	Cluster001
DHCR7	199	ENSSSCG00000021181	ENSSSCT00000029497, ENSSSCT00000064795, XM_021082642, XM_021082643, XM_021082644	2:2357714-2394851:+1	7-dehydrocholesterol reductase	Cluster001
DHX15	298	ENSSSCG00000008756	ENSSSCT00000009580, ENSSSCT00000040511, ENSSSCT00000064800	8:18563572-18620900:-1	DEAH-box helicase 15	Cluster001
DHX29	367	ENSSSCG00000016907	ENSSSCT00000018413, ENSSSCT00000025611, ENSSSCT00000030291, XM_003133948, XM_013984775	16:34425720-34478878:-1	DExH-box helicase 29	Cluster001
DHX36	131	ENSSSCG00000024916	ENSSSCT00000027576, XM_021069687, XM_021069688	13:94299605-94350303:-1	DEAH-box helicase 36	Cluster001
DHX57	786	ENSSSCG00000008479	ENSSSCT00000009281, ENSSSCT00000027140, ENSSSCT00000045436, ENSSSCT00000047956, XM_021087592, XM_021087593, XM_021087594	3:101458895-101569798:+1	DExH-box helicase 57	Cluster001
DICER1	422	ENSSSCG00000028225	ENSSSCT00000022914, ENSSSCT00000038351, ENSSSCT00000039889, ENSSSCT00000049913, ENSSSCT00000050852, ENSSSCT00000059204, XM_013989222, XM_013989223, XM_021098166, XM_021098167, XM_021098168, XM_021098170, XM_021098171, XM_021098172, XM_021098173, XM_021098174, XM_021098176, XM_021098177, XM_021098178, XM_021098180, XM_021098181, XM_021098183	7:116361678-116436396:-1	dicer 1, ribonuclease III	Cluster001
DIMT1	166	ENSSSCG00000031990	ENSSSCT00000062892, XM_021076560	16:41097818-41111257:-1	DIM1 dimethyladenosine transferase 1 homolog	Cluster001
DIPK2A	316	ENSSSCG00000036206	ENSSSCT00000058048	13:84634710-84656112:+1	divergent protein kinase domain 2A	Cluster001
DIS3	208	ENSSSCG00000009460	ENSSSCT00000010370, ENSSSCT00000046267, XM_003131019, XM_021065657	11:45044508-45075981:-1	DIS3 homolog, exosome endoribonuclease and 3 -5 exoribonuclease	Cluster001
DIS3L	113	ENSSSCG00000004941	ENSSSCT00000005453, ENSSSCT00000024119, ENSSSCT00000039494, XM_021100270, XM_021100274	1:164309837-164351928:+1	DIS3 like exosome 3 -5 exoribonuclease	Cluster001
DISP1	5	ENSSSCG00000035479	ENSSSCT00000037344, ENSSSCT00000039557, ENSSSCT00000044320, ENSSSCT00000047060, ENSSSCT00000049909, ENSSSCT00000062555, ENSSSCT00000065639, ENSSSCT00000066392, XM_021064348, XM_021064349, XM_021064350, XM_021064352, XM_021064353, XM_021064355, XM_021064356, XM_021064357, XM_021064358, XM_021064359, XM_021064360, XM_021064362, XM_021064363	10:11525783-11709891:+1	dispatched RND transporter family member 1	Cluster001
DLG2	250	ENSSSCG00000014904	ENSSSCT00000016259, ENSSSCT00000039634, ENSSSCT00000045223, XM_003357228, XM_021102303, XM_021102304, XM_021102305, XM_021102306, XM_021102307, XM_021102308, XM_021102309, XM_021102310, XM_021102312, XM_021102313, XM_021102316, XM_021102317, XM_021102318, XM_021102319, XM_021102320, XM_021102321, XM_021102322, XM_021102323, XM_021102324, XM_021102325	9:17576151-18495897:-1	discs large MAGUK scaffold protein 2	Cluster001
DLG3	639	ENSSSCG00000012375	ENSSSCT00000013532, ENSSSCT00000043191, ENSSSCT00000051267, ENSSSCT00000066103, XM_003484122, XM_013990918, XM_013990919	X:56472317-56527857:+1	discs large MAGUK scaffold protein 3	Cluster001
DLG5	85	ENSSSCG00000026268	ENSSSCT00000027181, ENSSSCT00000034607, XM_021074240	14:80249697-80377533:-1	discs large MAGUK scaffold protein 5	Cluster001
DMTF1	643	ENSSSCG00000015393	ENSSSCT00000016768, ENSSSCT00000051661, ENSSSCT00000053118, ENSSSCT00000059103, ENSSSCT00000063267, XM_005656701, XM_005656704, XM_013989601, XM_021063470, XM_021063471	9:93416453-93463082:-1	cyclin D binding myb like transcription factor 1	Cluster001
DNAAF4	260	ENSSSCG00000004608	ENSSSCT00000005089, XM_021094959, XM_021094972	1:116332319-116429983:+1	dynein axonemal assembly factor 4	Cluster001
DNAH10	560	ENSSSCG00000009765	ENSSSCT00000010707, ENSSSCT00000048259, XM_021072220, XM_021072221, XM_021072223, XM_021072224, XM_021072225, XM_021072226, XM_021072227, XM_021072228	14:29095722-29249638:-1	dynein axonemal heavy chain 10	Cluster001
DNAH5	2	ENSSSCG00000032827	ENSSSCT00000054017, XM_021076646	16:3116189-3364956:-1	dynein axonemal heavy chain 5	Cluster001
DNAJA1	586	ENSSSCG00000011000	ENSSSCT00000012042, ENSSSCT00000063153, XM_021063987	10:33430985-33445584:-1	DnaJ heat shock protein family (Hsp40) member A1	Cluster001
DNAJB5	304	ENSSSCG00000005297	ENSSSCT00000005834, ENSSSCT00000051472, ENSSSCT00000051952, ENSSSCT00000056367, ENSSSCT00000057370, XM_003121979, XM_005654514, XM_013986243, XM_013986248	1:235790520-235799375:+1	DnaJ heat shock protein family (Hsp40) member B5	Cluster001
DNAJB6	370	ENSSSCG00000033272	ENSSSCT00000037441, ENSSSCT00000046197, ENSSSCT00000060196, XM_021079268, XM_021079269, XM_021079270, XM_021079271, XM_021079272, XM_021079273, XM_021079274, XM_021079276	18:1444739-1499876:-1	DnaJ heat shock protein family (Hsp40) member B6	Cluster001
DNAJC13	108	ENSSSCG00000011628	ENSSSCT00000012725, ENSSSCT00000054517, ENSSSCT00000055186, ENSSSCT00000064607, XM_003132418, XM_021069457	13:73573926-73710844:+1	DnaJ heat shock protein family (Hsp40) member C13	Cluster001
DNAJC15	1	ENSSSCG00000038251	ENSSSCT00000049520, XM_001925120	11:24005781-24087044:-1	DnaJ heat shock protein family (Hsp40) member C15	Cluster001
DNAJC2	180	ENSSSCG00000015423	ENSSSCT00000016801, ENSSSCT00000066328, XM_005667716, XM_005667717	9:103329875-103359519:-1	DnaJ heat shock protein family (Hsp40) member C2	Cluster001
DNAJC24	119	ENSSSCG00000026083	ENSSSCT00000032359, ENSSSCT00000059636, XM_013994473, XM_013994474	2:29305410-29365167:-1	DnaJ heat shock protein family (Hsp40) member C24	Cluster001
DNAJC8	306	ENSSSCG00000038907	ENSSSCT00000058806, XM_003356239, XM_021095664	6:85274048-85305305:-1	DnaJ heat shock protein family (Hsp40) member C8	Cluster001
DNMT1	325	ENSSSCG00000013659	ENSSSCT00000014923, ENSSSCT00000038267, ENSSSCT00000040931, ENSSSCT00000046238, ENSSSCT00000055180, ENSSSCT00000061264, XM_005654828, XM_005654829, XM_021082029, XM_021082036, XM_021082040, XM_021082042, XM_021082053, XM_021082064	2:68981566-69029855:-1	DNA methyltransferase 1	Cluster001
DOCK11	49	ENSSSCG00000012634	ENSSSCT00000013815, XM_021080484	X:97068535-97267511:+1	dedicator of cytokinesis 11	Cluster001
DOCK7	476	ENSSSCG00000003818	ENSSSCT00000004225, ENSSSCT00000047866, ENSSSCT00000054439, ENSSSCT00000060418, ENSSSCT00000065151, XM_021096545, XM_021096546, XM_021096548, XM_021096549, XM_021096550, XM_021096551, XM_021096552	6:149747860-149971847:+1	dedicator of cytokinesis 7	Cluster001
DOK4	451	ENSSSCG00000029165	ENSSSCT00000024456, XM_005655786, XM_005655787, XM_013988524	6:19401070-19413641:-1	docking protein 4	Cluster001
DOK5	570	ENSSSCG00000007488	ENSSSCT00000008197	17:55390720-55542254:+1	docking protein 5	Cluster001
DOK6	803	ENSSSCG00000028977	ENSSSCT00000030293, ENSSSCT00000065685, XM_013993284, XM_021099323, XM_021099324, XM_021099326, XM_021099328	1:153042000-153393098:-1	docking protein 6	Cluster001
DONSON	130	ENSSSCG00000027089	ENSSSCT00000029073, ENSSSCT00000049463, XM_013990191	13:197187259-197248406:-1	downstream neighbor of SON	Cluster001
DOP1A	50	ENSSSCG00000004457	ENSSSCT00000004923, ENSSSCT00000022952, ENSSSCT00000035912, ENSSSCT00000037010, ENSSSCT00000046795	1:83026514-83141042:-1	DOP1 leucine zipper like protein A	Cluster001
DOPEY1	378	.	XM_003480309, XM_005659411, XM_021091824, XM_021091831, XM_021091842, XM_021091853, XM_021091863, XM_021091876, XM_021091892	.	dopey family member 1	Cluster001
DPF1	602	ENSSSCG00000025160	ENSSSCT00000025066, ENSSSCT00000053719, ENSSSCT00000060571, ENSSSCT00000063651, XM_021094331, XM_021094332, XM_021094333, XM_021094335, XM_021094336, XM_021094337, XM_021094338, XM_021094339	6:47138337-47155274:-1	double PHD fingers 1	Cluster001
DPM1	297	ENSSSCG00000034952	ENSSSCT00000008179, ENSSSCT00000040191, XM_013985457	17:52350235-52377275:-1	dolichyl-phosphate mannosyltransferase subunit 1, catalytic	Cluster001
DPP10	28	ENSSSCG00000015711	ENSSSCT00000017111, XM_021075451	15:21504032-22009736:+1	dipeptidyl peptidase like 10	Cluster001
DPYSL3	708	ENSSSCG00000036549	ENSSSCT00000015759, ENSSSCT00000040329, ENSSSCT00000066373, XM_003124066	2:148662051-148855649:-1	dihydropyrimidinase like 3	Cluster001
DPYSL5	603	ENSSSCG00000008560	ENSSSCT00000009365, XM_003125320	3:112155542-112252968:-1	dihydropyrimidinase like 5	Cluster001
DRAXIN	645	ENSSSCG00000003423	ENSSSCT00000003797, ENSSSCT00000003798, XM_021095333	6:71798607-71814771:+1	dorsal inhibitory axon guidance protein	Cluster001
DROSHA	82	ENSSSCG00000016809	ENSSSCT00000018300, ENSSSCT00000043287, ENSSSCT00000048093, ENSSSCT00000062558, XM_021077126	16:17684934-17848120:-1	drosha ribonuclease III	Cluster001
DSCR3	33	.	XM_003483358, XM_005670333	.	DSCR3 arrestin fold containing	Cluster001
DSPP	513	.	XM_021100402, XM_021100403, XM_021100404, XM_021100405, XM_021100406	.	dentin sialophosphoprotein	Cluster001
DUSP18	409	.	XM_001929337, XM_003359153, XM_005670849, XM_013983071, XM_021072953	.	dual specificity phosphatase 18	Cluster001
DUSP7	7	ENSSSCG00000011430	ENSSSCT00000012510, XM_003132247	13:34197876-34206493:-1	dual specificity phosphatase 7	Cluster001
DUSP8	59	ENSSSCG00000032911	ENSSSCT00000042347, ENSSSCT00000056757, XM_021082598	2:1008761-1016641:-1	dual specificity phosphatase 8	Cluster001
DUSP9	59	ENSSSCG00000012774	ENSSSCT00000034977, XM_013986547, XM_021079668, XM_021079669, XM_021079670, XM_021079671	X:124410074-124414309:+1	dual specificity phosphatase 9	Cluster001
DYM	153	ENSSSCG00000004508	ENSSSCT00000004980, ENSSSCT00000022523, ENSSSCT00000024612, ENSSSCT00000044909, XM_021092897, XM_021092904, XM_021092915, XM_021092933	1:98642509-99024664:-1	dymeclin	Cluster001
DYNC1I2	424	ENSSSCG00000015948	ENSSSCT00000017365, ENSSSCT00000038705, ENSSSCT00000043232, ENSSSCT00000063571, ENSSSCT00000066066	15:77803334-77859701:+1	dynein cytoplasmic 1 intermediate chain 2	Cluster001
DYNC2H1	282	.	XM_021062717	.	dynein cytoplasmic 2 heavy chain 1	Cluster001
DYNLL1	77	ENSSSCG00000009904	ENSSSCT00000010854	14:40455923-40459104:+1	dynein light chain LC8-type 1	Cluster001
DYNLT1	867	ENSSSCG00000033107	ENSSSCT00000042927, ENSSSCT00000054081	1:8555745-8567087:+1	dynein light chain Tctex-type 1	Cluster001
DYRK1A	815	ENSSSCG00000030480	ENSSSCT00000013196, ENSSSCT00000028889, ENSSSCT00000041061, ENSSSCT00000059892, XM_005670334, XM_005670335, XM_005670336, XM_013982583, XM_013982584, XM_013982585, XM_021070970, XM_021070971, XM_021070972, XM_021070973	13:201008329-201159952:+1	dual specificity tyrosine phosphorylation regulated kinase 1A	Cluster001
DYRK2	517	ENSSSCG00000000958	ENSSSCT00000001047, ENSSSCT00000055554, ENSSSCT00000056796, XM_021091962, XM_021091965, XM_021091966	5:32047643-32064222:+1	dual specificity tyrosine phosphorylation regulated kinase 2	Cluster001
DZIP3	206	ENSSSCG00000011940	ENSSSCT00000013065, ENSSSCT00000037908, ENSSSCT00000049075, ENSSSCT00000057462, XM_021070418, XM_021070419, XM_021070420, XM_021070421, XM_021070422, XM_021070423, XM_021070424, XM_021070425, XM_021070426, XM_021070428, XM_021070429, XM_021070430, XM_021070431	13:150796667-150933799:-1	DAZ interacting zinc finger protein 3	Cluster001
E2F5	295	ENSSSCG00000006145	ENSSSCT00000006738, XM_001924905, XM_005662996	4:51479051-51512840:-1	E2F transcription factor 5	Cluster001
EAPP	760	ENSSSCG00000001960	ENSSSCT00000002193, XM_001928370, XM_021099174	7:65240204-65263272:+1	E2F associated phosphoprotein	Cluster001
EBAG9	57	ENSSSCG00000006024	ENSSSCT00000006611, ENSSSCT00000047634, ENSSSCT00000059006, XM_013988048	4:27986866-28013914:-1	estrogen receptor binding site associated, antigen, 9	Cluster001
EBF4	73	ENSSSCG00000007171	ENSSSCT00000007844, XM_021077748, XM_021077749, XM_021077750, XM_021077752, XM_021077753, XM_021077754, XM_021077755, XM_021077756, XM_021077757	17:32874812-32943828:-1	early B-cell factor 4	Cluster001
ECD	114	ENSSSCG00000010295	ENSSSCT00000011268, ENSSSCT00000045704, ENSSSCT00000063049, XM_003359230, XM_005671096, XM_021074316, XM_021074317, XM_021074318, XM_021074320	14:75952431-75992568:-1	ecdysoneless cell cycle regulator	Cluster001
EDRF1	99	ENSSSCG00000010741	ENSSSCT00000011753, ENSSSCT00000039759, ENSSSCT00000049634, XM_003133222, XM_003359396, XM_005671561	14:135041500-135089100:+1	erythroid differentiation regulatory factor 1	Cluster001
EFCAB2	5	ENSSSCG00000010878	ENSSSCT00000011901, XM_005653792, XM_013978388, XM_021064465	10:17559248-17655269:+1	EF-hand calcium binding domain 2	Cluster001
EFCAB5	217	ENSSSCG00000017794	ENSSSCT00000019366, ENSSSCT00000040443, XM_013981195	12:46013635-46204433:+1	EF-hand calcium binding domain 5	Cluster001
EFCAB7	66	ENSSSCG00000003814	ENSSSCT00000004221, ENSSSCT00000052439, XM_013988883	6:148939053-148996669:-1	EF-hand calcium binding domain 7	Cluster001
EFL1	285	ENSSSCG00000001792	ENSSSCT00000002008, ENSSSCT00000029552, ENSSSCT00000048968, XM_021098870	7:50839703-50977070:-1	elongation factor like GTPase 1	Cluster001
EFNA2	317	ENSSSCG00000038701	ENSSSCT00000050735, XM_005661390, XM_021084254	2:77164605-77179137:-1	ephrin A2	Cluster001
EGLN2	6	ENSSSCG00000002995	ENSSSCT00000003327, XM_013988588	6:49002301-49009453:+1	egl-9 family hypoxia inducible factor 2	Cluster001
EHBP1	705	ENSSSCG00000008372	ENSSSCT00000009167, ENSSSCT00000024919, ENSSSCT00000037536, ENSSSCT00000046220, ENSSSCT00000049734, ENSSSCT00000052845, ENSSSCT00000054931, ENSSSCT00000059752, ENSSSCT00000061355, ENSSSCT00000061454, XM_021087469, XM_021087470, XM_021087471, XM_021087472, XM_021087473, XM_021087474, XM_021087475, XM_021087476, XM_021087477, XM_021087478	3:78896498-79345378:-1	EH domain binding protein 1	Cluster001
EIF1AX	483	ENSSSCG00000032223	ENSSSCT00000057207	X:16429518-16449589:-1	eukaryotic translation initiation factor 1A X-linked	Cluster001
EIF2A	50	ENSSSCG00000011710	ENSSSCT00000012820, ENSSSCT00000055153, ENSSSCT00000055679, XM_021069600	13:90761643-90806712:+1	eukaryotic translation initiation factor 2A	Cluster001
EIF2AK3	75	ENSSSCG00000008208	ENSSSCT00000008989, ENSSSCT00000032709, ENSSSCT00000056246, ENSSSCT00000064768	3:57423943-57506246:+1	eukaryotic translation initiation factor 2 alpha kinase 3	Cluster001
EIF2AK4	105	ENSSSCG00000039061	ENSSSCT00000024247, ENSSSCT00000038114, ENSSSCT00000041164, ENSSSCT00000045624, ENSSSCT00000048679, ENSSSCT00000054025, ENSSSCT00000054318, ENSSSCT00000056508, ENSSSCT00000057886, ENSSSCT00000059269, XM_021097873, XM_021097878, XM_021097886	1:131241571-131355291:-1	eukaryotic translation initiation factor 2 alpha kinase 4	Cluster001
EIF2B1	1	.	XM_005670583	.	eukaryotic translation initiation factor 2B subunit alpha	Cluster001
EIF2B2	360	ENSSSCG00000002377	ENSSSCT00000002643, ENSSSCT00000038266, ENSSSCT00000042849, XM_003128668, XM_005656417, XM_021099531	7:98203440-98210407:+1	eukaryotic translation initiation factor 2B subunit beta	Cluster001
EIF2S2	173	ENSSSCG00000026617	ENSSSCT00000029372, ENSSSCT00000041841, XM_001929150	17:37538321-37570346:-1	eukaryotic translation initiation factor 2 subunit beta	Cluster001
EIF3A	605	ENSSSCG00000010679	ENSSSCT00000011680, ENSSSCT00000042252, XM_001928342	14:128966336-129007234:-1	eukaryotic translation initiation factor 3 subunit A	Cluster001
EIF3D	204	ENSSSCG00000000141	ENSSSCT00000000147	5:11213281-11233149:+1	eukaryotic translation initiation factor 3 subunit D	Cluster001
EIF3H	737	ENSSSCG00000006016	ENSSSCT00000006602, ENSSSCT00000046697, XM_003125515, XM_005662892	4:21954966-22054441:+1	eukaryotic translation initiation factor 3 subunit H	Cluster001
EIF3L	167	ENSSSCG00000000119	ENSSSCT00000000125, ENSSSCT00000036950, ENSSSCT00000046625, XM_021091040	5:9966122-9996260:-1	eukaryotic translation initiation factor 3 subunit L	Cluster001
EIF4E	243	ENSSSCG00000028420	ENSSSCT00000032198, XM_003129314, XM_005656555	8:121409716-121466897:+1	eukaryotic translation initiation factor 4E	Cluster001
EIF4EBP2	507	ENSSSCG00000034444	ENSSSCT00000059458	14:73323620-73349289:+1	eukaryotic translation initiation factor 4E binding protein 2	Cluster001
EIF4ENIF1	11	ENSSSCG00000010030	ENSSSCT00000010987, ENSSSCT00000042344, XM_001927490, XM_021073983, XM_021073984, XM_021073985, XM_021073986, XM_021073988, XM_021073989	14:48156841-48204338:-1	eukaryotic translation initiation factor 4E nuclear import factor 1	Cluster001
EIF5	436	.	XM_021081661, XM_021081662, XM_021081663, XM_021081664, XM_021081665	.	eukaryotic translation initiation factor 5	Cluster001
EIF5B	48	ENSSSCG00000008180	ENSSSCT00000008959, ENSSSCT00000022947, XM_021087192, XM_021087193	3:54863623-54930849:-1	eukaryotic translation initiation factor 5B	Cluster001
ELFN1	166	ENSSSCG00000030485	ENSSSCT00000024339	3:1188155-1190641:+1	extracellular leucine rich repeat and fibronectin type III domain containing 1	Cluster001
ELK4	61	ENSSSCG00000025182	ENSSSCT00000028838, ENSSSCT00000037380, ENSSSCT00000056047, XM_003357396, XM_005667536	9:66297338-66316374:-1	ELK4, ETS transcription factor	Cluster001
ELMOD1	335	ENSSSCG00000015002	ENSSSCT00000016366, ENSSSCT00000037302, ENSSSCT00000040363, ENSSSCT00000052832, ENSSSCT00000064257, XM_013979345, XM_013979348, XM_021062733, XM_021062734, XM_021062735, XM_021062736, XM_021062737	9:36141881-36209063:+1	ELMO domain containing 1	Cluster001
EML4	288	ENSSSCG00000008467	ENSSSCT00000009269, ENSSSCT00000043652, ENSSSCT00000047843, XM_003125196, XM_005662587, XM_005662588, XM_013996185, XM_013996186	3:98005813-98155842:-1	echinoderm microtubule associated protein like 4	Cluster001
EML5	103	.	XM_021099592	.	echinoderm microtubule associated protein like 5	Cluster001
EMSY	151	ENSSSCG00000014868	ENSSSCT00000016221, ENSSSCT00000042237, ENSSSCT00000062021, ENSSSCT00000062151, ENSSSCT00000062543, ENSSSCT00000062568, ENSSSCT00000065038, XM_003482569, XM_005667141, XM_005667143, XM_005667144, XM_005667148, XM_013979150, XM_013979151, XM_013979152, XM_013979153, XM_013979154, XM_013979155, XM_013979156, XM_013979157, XM_013979158, XM_013979159, XM_021062538, XM_021062539, XM_021062540, XM_0210…	9:10628053-10716398:+1	EMSY, BRCA2 interacting transcriptional repressor	Cluster001
ENOX1	74	ENSSSCG00000021818	ENSSSCT00000022928, ENSSSCT00000045599, ENSSSCT00000062725, XM_021065348, XM_021065349, XM_021065350, XM_021065351, XM_021065352, XM_021065353, XM_021065355, XM_021065356, XM_021065358, XM_021065359, XM_021065360, XM_021065361	11:23237692-23894699:+1	ecto-NOX disulfide-thiol exchanger 1	Cluster001
ENSSSCG00000000040	190	ENSSSCG00000000040	ENSSSCT00000000042, ENSSSCT00000000043, ENSSSCT00000040807, ENSSSCT00000049671	5:6604283-6654438:-1	septin 3	Cluster001
ENSSSCG00000000377	23	ENSSSCG00000000377	ENSSSCT00000000403, ENSSSCT00000023025, ENSSSCT00000042385, ENSSSCT00000048963, ENSSSCT00000057428	5:21496025-21504946:+1	proliferation-associated 2G4	Cluster001
ENSSSCG00000000635	2	ENSSSCG00000000635	ENSSSCT00000000682	5:61425829-61433947:+1	mago homolog B, exon junction complex subunit	Cluster001
ENSSSCG00000000882	158	ENSSSCG00000000882	ENSSSCT00000000964, ENSSSCT00000000965, ENSSSCT00000000966, ENSSSCT00000061480	5:84080422-85065974:+1	ankyrin repeat and sterile alpha motif domain containing 1B	Cluster001
ENSSSCG00000000906	43	ENSSSCG00000000906	ENSSSCT00000000990, ENSSSCT00000042369, ENSSSCT00000056101	5:88606814-88682326:+1	transmembrane and coiled-coil domain family 3	Cluster001
ENSSSCG00000000940	225	ENSSSCG00000000940	ENSSSCT00000001028, ENSSSCT00000042751, ENSSSCT00000055406, ENSSSCT00000056469, ENSSSCT00000056769, ENSSSCT00000058216, ENSSSCT00000060284	5:99818795-100279030:+1	PTPRF interacting protein alpha 2	Cluster001
ENSSSCG00000001202	14	ENSSSCG00000001202	ENSSSCT00000001300	7:22010409-22011463:+1	No Class	Cluster001
ENSSSCG00000002505	127	ENSSSCG00000002505	ENSSSCT00000002783, ENSSSCT00000027948, ENSSSCT00000053651, ENSSSCT00000061740	7:117676398-117741911:+1	poly(A) polymerase alpha	Cluster001
ENSSSCG00000002639	584	ENSSSCG00000002639	ENSSSCT00000002929	6:168452-178462:-1	No Class	Cluster001
ENSSSCG00000002729	4	ENSSSCG00000002729	ENSSSCT00000003024	6:13683801-13791246:-1	Vac14, PIKFYVE complex component	Cluster001
ENSSSCG00000002841	124	ENSSSCG00000002841	ENSSSCT00000003142, ENSSSCT00000058108	6:36122035-36188003:+1	NEDD4 binding protein 1	Cluster001
ENSSSCG00000002877	110	ENSSSCG00000002877	ENSSSCT00000003179, ENSSSCT00000042052, ENSSSCT00000048797, ENSSSCT00000052302	6:44243314-44357540:+1	zinc finger protein 181	Cluster001
ENSSSCG00000002935	203	ENSSSCG00000002935	ENSSSCT00000003248, ENSSSCT00000038450, ENSSSCT00000055356	6:46093204-46121776:-1	zinc finger protein 568	Cluster001
ENSSSCG00000002937	45	ENSSSCG00000002937	ENSSSCT00000040852, ENSSSCT00000046937	6:46484117-46530389:-1	zinc finger protein 420	Cluster001
ENSSSCG00000002938	75	ENSSSCG00000002938	ENSSSCT00000003260	6:46209122-46229060:-1	No Class	Cluster001
ENSSSCG00000003035	97	ENSSSCG00000003035	ENSSSCT00000003371, ENSSSCT00000060079	6:49689638-49703668:+1	glycogen synthase kinase 3 alpha	Cluster001
ENSSSCG00000003741	34	ENSSSCG00000003741	ENSSSCT00000004142, ENSSSCT00000041427, ENSSSCT00000043383, ENSSSCT00000045162	6:119104467-119132976:+1	zinc finger protein 397	Cluster001
ENSSSCG00000003771	193	ENSSSCG00000003771	ENSSSCT00000004169, ENSSSCT00000004173, ENSSSCT00000048540, ENSSSCT00000053943, ENSSSCT00000054267, ENSSSCT00000054676, ENSSSCT00000055676	6:135281521-135318714:+1	far upstream element binding protein 1	Cluster001
ENSSSCG00000003793	224	ENSSSCG00000003793	ENSSSCT00000004197	6:142738478-142834884:-1	No Class	Cluster001
ENSSSCG00000003849	296	ENSSSCG00000003849	ENSSSCT00000004261	6:158988583-158998984:+1	mago homolog, exon junction complex subunit	Cluster001
ENSSSCG00000003965	34	ENSSSCG00000003965	ENSSSCT00000004386, ENSSSCT00000044119, ENSSSCT00000049918, ENSSSCT00000053553, ENSSSCT00000054287, ENSSSCT00000058886	6:168765541-168870307:-1	coiled-coil domain containing 30	Cluster001
ENSSSCG00000004054	112	ENSSSCG00000004054	ENSSSCT00000004482	11:54083015-54083407:-1	40S ribosomal protein S15a pseudogene	Cluster001
ENSSSCG00000004294	519	ENSSSCG00000004294	ENSSSCT00000004748, ENSSSCT00000045742, ENSSSCT00000055678, ENSSSCT00000063076	1:54563092-54598412:-1	synaptotagmin binding cytoplasmic RNA interacting protein	Cluster001
ENSSSCG00000005508	8	ENSSSCG00000005508	ENSSSCT00000006058, ENSSSCT00000029304, ENSSSCT00000049838	1:260825616-260840226:-1	No Class	Cluster001
ENSSSCG00000006510	12	ENSSSCG00000006510	ENSSSCT00000007130, ENSSSCT00000028079, ENSSSCT00000029338, ENSSSCT00000029745, ENSSSCT00000057637	4:94161520-94248784:+1	gon-4 like	Cluster001
ENSSSCG00000007001	22	ENSSSCG00000007001	ENSSSCT00000007667, ENSSSCT00000023191, ENSSSCT00000040979	17:25940-112834:-1	ankyrin repeat domain-containing protein 26-like	Cluster001
ENSSSCG00000007098	60	ENSSSCG00000007098	ENSSSCT00000007770	17:26811134-26946672:+1	D-tyrosyl-tRNA deacylase 1	Cluster001
ENSSSCG00000007454	238	ENSSSCG00000007454	ENSSSCT00000008158	17:49258553-49337793:-1	zinc finger MYND-type containing 8	Cluster001
ENSSSCG00000007978	28	ENSSSCG00000007978	ENSSSCT00000008741, ENSSSCT00000034348, ENSSSCT00000034581	3:41482260-41487800:-1	hemoglobin subunit alpha	Cluster001
ENSSSCG00000008415	279	ENSSSCG00000008415	ENSSSCT00000009215	3:87389835-87501290:+1	ankyrin repeat and SOCS box containing 3	Cluster001
ENSSSCG00000009534	119	ENSSSCG00000009534	ENSSSCT00000010452, ENSSSCT00000059859, ENSSSCT00000062126	11:71110463-71139605:+1	basic, immunoglobulin-like variable motif containing	Cluster001
ENSSSCG00000010128	345	ENSSSCG00000010128	ENSSSCT00000011089, ENSSSCT00000034752, ENSSSCT00000037080, ENSSSCT00000048800, ENSSSCT00000062308	14:51252340-51261616:+1	septin 5	Cluster001
ENSSSCG00000010440	202	ENSSSCG00000010440	ENSSSCT00000011425	14:99929448-100023251:+1	phosphatase and tensin homolog	Cluster001
ENSSSCG00000010685	95	ENSSSCG00000010685	ENSSSCT00000011686, ENSSSCT00000040327, ENSSSCT00000041191, ENSSSCT00000041990, ENSSSCT00000055569, ENSSSCT00000064923	14:129441211-129467150:-1	TIA1 cytotoxic granule associated RNA binding protein like 1	Cluster001
ENSSSCG00000011117	206	ENSSSCG00000011117	ENSSSCT00000012166, ENSSSCT00000029333, ENSSSCT00000032194, ENSSSCT00000050826, ENSSSCT00000059021, ENSSSCT00000061084, ENSSSCT00000065261	10:59774505-60105413:+1	UPF2, regulator of nonsense mediated mRNA decay	Cluster001
ENSSSCG00000011465	59	ENSSSCG00000011465	ENSSSCT00000012546	13:39395533-39435110:+1	phosphodiesterase 12	Cluster001
ENSSSCG00000011493	66	ENSSSCG00000011493	ENSSSCT00000012576, ENSSSCT00000040902, ENSSSCT00000042772, ENSSSCT00000045012, ENSSSCT00000048532, ENSSSCT00000059028, ENSSSCT00000064610	13:45391196-45508849:+1	ataxin 7	Cluster001
ENSSSCG00000011676	191	ENSSSCG00000011676	ENSSSCT00000012782, ENSSSCT00000043761, ENSSSCT00000065186, ENSSSCT00000065858, ENSSSCT00000066135	13:82680417-82759966:+1	ATPase Na+/K+ transporting subunit beta 3	Cluster001
ENSSSCG00000011761	607	ENSSSCG00000011761	ENSSSCT00000012872	13:116969499-116998880:+1	potassium calcium-activated channel subfamily M regulatory beta subunit 2	Cluster001
ENSSSCG00000012060	7	ENSSSCG00000012060	ENSSSCT00000013192, ENSSSCT00000038508	13:200644004-200653061:+1	ripply transcriptional repressor 3	Cluster001
ENSSSCG00000012125	23	ENSSSCG00000012125	ENSSSCT00000013264, ENSSSCT00000060499	X:10366164-10415501:+1	OFD1, centriole and centriolar satellite protein	Cluster001
ENSSSCG00000012152	20	ENSSSCG00000012152	ENSSSCT00000013293, ENSSSCT00000051690	X:14210051-14223645:+1	Scm polycomb group protein like 1	Cluster001
ENSSSCG00000012253	199	ENSSSCG00000012253	ENSSSCT00000035253	X:37168407-37535561:-1	calcium/calmodulin dependent serine protein kinase	Cluster001
ENSSSCG00000012264	46	ENSSSCG00000012264	ENSSSCT00000013411, ENSSSCT00000039214, ENSSSCT00000042539, ENSSSCT00000051467, ENSSSCT00000057216	X:41089601-41118904:+1	zinc finger protein 674	Cluster001
ENSSSCG00000012270	565	ENSSSCG00000012270	ENSSSCT00000013417, ENSSSCT00000032997, ENSSSCT00000033113, ENSSSCT00000048593	X:41810142-41832840:+1	ubiquitin like modifier activating enzyme 1	Cluster001
ENSSSCG00000012319	289	ENSSSCG00000012319	ENSSSCT00000013470, ENSSSCT00000034646	AEMK02000254.1:114521-122441:+1	melanoma-associated antigen D4-like	Cluster001
ENSSSCG00000012566	16	ENSSSCG00000012566	ENSSSCT00000013741, ENSSSCT00000047013, ENSSSCT00000051072, ENSSSCT00000055035, ENSSSCT00000056328, ENSSSCT00000057009	X:88403526-88515450:+1	NACHT, LRR and PYD domains-containing protein 3	Cluster001
ENSSSCG00000013315	151	ENSSSCG00000013315	ENSSSCT00000014541	2:28256488-28282795:-1	eukaryotic translation initiation factor 3 subunit M	Cluster001
ENSSSCG00000013405	663	ENSSSCG00000013405	ENSSSCT00000014645, ENSSSCT00000044271	2:48667694-48679368:+1	eukaryotic translation initiation factor 4 gamma 2	Cluster001
ENSSSCG00000013715	38	ENSSSCG00000013715	ENSSSCT00000014980, ENSSSCT00000043253, ENSSSCT00000043841, ENSSSCT00000043900, ENSSSCT00000045265, ENSSSCT00000048932, ENSSSCT00000065087	2:66718077-66853255:+1	zinc finger protein 709-like	Cluster001
ENSSSCG00000013900	226	ENSSSCG00000013900	ENSSSCT00000015186	2:59637368-59684319:-1	phosphoinositide-3-kinase regulatory subunit 2	Cluster001
ENSSSCG00000014075	57	ENSSSCG00000014075	ENSSSCT00000015376	2:83843888-83851227:+1	NSA2, ribosome biogenesis homolog	Cluster001
ENSSSCG00000014280	215	ENSSSCG00000014280	ENSSSCT00000015599, ENSSSCT00000015603, ENSSSCT00000037084, ENSSSCT00000037450, ENSSSCT00000038671, ENSSSCT00000044716, ENSSSCT00000045295, ENSSSCT00000061052, ENSSSCT00000061193, ENSSSCT00000062915	2:134660735-134943144:+1	solute carrier family 22 member 5	Cluster001
ENSSSCG00000014343	94	ENSSSCG00000014343	ENSSSCT00000015671, ENSSSCT00000040778, ENSSSCT00000040894, ENSSSCT00000040926, ENSSSCT00000048814, ENSSSCT00000052776, ENSSSCT00000057911, ENSSSCT00000058287, ENSSSCT00000061551, ENSSSCT00000066118	2:141179564-141231658:+1	matrin 3	Cluster001
ENSSSCG00000014380	1	ENSSSCG00000014380	ENSSSCT00000015710	2:142830525-142832881:+1	protocadherin beta-5-like	Cluster001
ENSSSCG00000014935	207	ENSSSCG00000014935	ENSSSCT00000016292, ENSSSCT00000037972, ENSSSCT00000038199, ENSSSCT00000051131, ENSSSCT00000056661	9:25085079-25471259:+1	FAT atypical cadherin 3	Cluster001
ENSSSCG00000014949	67	ENSSSCG00000014949	ENSSSCT00000016308, ENSSSCT00000042245, ENSSSCT00000047839	9:26167401-26215092:+1	mediator complex subunit 17	Cluster001
ENSSSCG00000014969	66	ENSSSCG00000014969	ENSSSCT00000016330	9:27812929-27859461:+1	centrosomal protein 57	Cluster001
ENSSSCG00000015023	55	ENSSSCG00000015023	ENSSSCT00000016387, ENSSSCT00000050617	9:39531478-39619873:-1	ALG9, alpha-1,2-mannosyltransferase	Cluster001
ENSSSCG00000015401	277	ENSSSCG00000015401	ENSSSCT00000016776, ENSSSCT00000025400, ENSSSCT00000027728, ENSSSCT00000064638	9:97317846-97508498:+1	piccolo presynaptic cytomatrix protein	Cluster001
ENSSSCG00000015491	469	ENSSSCG00000015491	ENSSSCT00000016875	9:115952423-115987704:-1	ankyrin repeat domain-containing protein 45	Cluster001
ENSSSCG00000015645	238	ENSSSCG00000015645	ENSSSCT00000017041, ENSSSCT00000029330, ENSSSCT00000056921, ENSSSCT00000063954, ENSSSCT00000065243	9:66837804-67117315:+1	SLIT-ROBO Rho GTPase activating protein 2	Cluster001
ENSSSCG00000016041	95	ENSSSCG00000016041	ENSSSCT00000017466, ENSSSCT00000054713, ENSSSCT00000057080, ENSSSCT00000062453	15:94261867-94274008:+1	asparagine synthetase domain containing 1	Cluster001
ENSSSCG00000016330	166	ENSSSCG00000016330	ENSSSCT00000017783, ENSSSCT00000017786, ENSSSCT00000030900, ENSSSCT00000040615, ENSSSCT00000045923, ENSSSCT00000047141, ENSSSCT00000052224	15:137283276-137439384:+1	LRR binding FLII interacting protein 1	Cluster001
ENSSSCG00000016493	501	ENSSSCG00000016493	ENSSSCT00000017957	18:8449699-8485234:-1	No Class	Cluster001
ENSSSCG00000016711	175	ENSSSCG00000016711	ENSSSCT00000018192, ENSSSCT00000051760, ENSSSCT00000052029, ENSSSCT00000055976, ENSSSCT00000065485	18:46193140-46204714:-1	chromobox 3	Cluster001
ENSSSCG00000017018	83	ENSSSCG00000017018	ENSSSCT00000018530, ENSSSCT00000049747, ENSSSCT00000050651	16:55625320-56086379:-1	teneurin transmembrane protein 2	Cluster001
ENSSSCG00000017038	145	ENSSSCG00000017038	ENSSSCT00000018551, ENSSSCT00000043377, ENSSSCT00000059849, ENSSSCT00000060022	16:63409697-63450295:+1	PWWP domain containing 2A	Cluster001
ENSSSCG00000017213	171	ENSSSCG00000017213	ENSSSCT00000018738	12:6139424-6158447:+1	Jupiter microtubule associated homolog 1	Cluster001
ENSSSCG00000017555	200	ENSSSCG00000017555	ENSSSCT00000019110, ENSSSCT00000036936, ENSSSCT00000057936	12:27004913-27032924:+1	LUC7 like 3 pre-mRNA splicing factor	Cluster001
ENSSSCG00000017783	61	ENSSSCG00000017783	ENSSSCT00000019355, ENSSSCT00000023408, ENSSSCT00000040344, ENSSSCT00000045327	12:45332229-45396730:-1	No Class	Cluster001
ENSSSCG00000021380	223	ENSSSCG00000021380	ENSSSCT00000030409, ENSSSCT00000046083	13:133689758-133747103:+1	UBX domain protein 7	Cluster001
ENSSSCG00000021414	353	ENSSSCG00000021414	ENSSSCT00000029328	2:142875088-142877496:+1	protocadherin beta-17-like	Cluster001
ENSSSCG00000021899	415	ENSSSCG00000021899	ENSSSCT00000026619, ENSSSCT00000055219	6:97883894-97948747:+1	No Class	Cluster001
ENSSSCG00000021941	71	ENSSSCG00000021941	ENSSSCT00000008383, ENSSSCT00000024849, ENSSSCT00000063876	3:7920669-7991814:+1	zinc finger with KRAB and SCAN domains 1	Cluster001
ENSSSCG00000022176	2	ENSSSCG00000022176	ENSSSCT00000028826, ENSSSCT00000049293, ENSSSCT00000053768	5:63937282-63938381:-1	No Class	Cluster001
ENSSSCG00000022331	294	ENSSSCG00000022331	ENSSSCT00000029012	X:113460199-113530948:-1	fibroblast growth factor 13	Cluster001
ENSSSCG00000022423	2	ENSSSCG00000022423	ENSSSCT00000030595, ENSSSCT00000052694	6:46259501-46282772:+1	No Class	Cluster001
ENSSSCG00000022449	122	ENSSSCG00000022449	ENSSSCT00000027879	1:261491935-261492938:+1	No Class	Cluster001
ENSSSCG00000023195	26	ENSSSCG00000023195	ENSSSCT00000030901, ENSSSCT00000055089, ENSSSCT00000061918	6:46045065-46079288:-1	zinc finger protein 568-like	Cluster001
ENSSSCG00000023264	296	ENSSSCG00000023264	ENSSSCT00000026412, ENSSSCT00000043430, ENSSSCT00000059742	15:111324991-111362321:-1	isocitrate dehydrogenase (NADP(+)) 1, cytosolic	Cluster001
ENSSSCG00000023324	28	ENSSSCG00000023324	ENSSSCT00000030447, ENSSSCT00000041538, ENSSSCT00000055636, ENSSSCT00000063432, ENSSSCT00000066282	9:45743478-45823883:+1	lysine methyltransferase 2A	Cluster001
ENSSSCG00000023560	389	ENSSSCG00000023560	ENSSSCT00000030704	14:134134831-134154652:-1	EEF1A lysine methyltransferase 2	Cluster001
ENSSSCG00000023746	9	ENSSSCG00000023746	ENSSSCT00000022273	15:10654760-11068576:+1	No Class	Cluster001
ENSSSCG00000023891	431	ENSSSCG00000023891	ENSSSCT00000031304, ENSSSCT00000037591, ENSSSCT00000052030, ENSSSCT00000056930, ENSSSCT00000059175, ENSSSCT00000060634	13:63596320-64205881:+1	glutamate metabotropic receptor 7	Cluster001
ENSSSCG00000026055	41	ENSSSCG00000026055	ENSSSCT00000000442, ENSSSCT00000026608, ENSSSCT00000066274	5:22063427-22089441:-1	DNA primase subunit 1	Cluster001
ENSSSCG00000026180	230	ENSSSCG00000026180	ENSSSCT00000022921, ENSSSCT00000044158, ENSSSCT00000060996	3:90489183-90914537:+1	neurexin 1	Cluster001
ENSSSCG00000026271	122	ENSSSCG00000026271	ENSSSCT00000034903	X:44913082-44919296:-1	nudix hydrolase 11	Cluster001
ENSSSCG00000026996	77	ENSSSCG00000026996	ENSSSCT00000032528, ENSSSCT00000037963, ENSSSCT00000052513	11:64086662-64309389:-1	ATP binding cassette subfamily C member 4	Cluster001
ENSSSCG00000027115	181	ENSSSCG00000027115	ENSSSCT00000032456, ENSSSCT00000045081, ENSSSCT00000052748, ENSSSCT00000053799	X:57382500-57466705:+1	TATA-box binding protein associated factor 1	Cluster001
ENSSSCG00000027852	70	ENSSSCG00000027852	ENSSSCT00000015713	2:142892832-142895246:+1	protocadherin beta-11-like	Cluster001
ENSSSCG00000028345	120	ENSSSCG00000028345	ENSSSCT00000023762, ENSSSCT00000025281, ENSSSCT00000029648	14:60884782-60905183:-1	zinc finger protein 33B	Cluster001
ENSSSCG00000028382	82	ENSSSCG00000028382	ENSSSCT00000030170	2:143067729-143071262:+1	No Class	Cluster001
ENSSSCG00000028663	163	ENSSSCG00000028663	ENSSSCT00000032106	7:96447235-96471315:+1	No Class	Cluster001
ENSSSCG00000028737	372	ENSSSCG00000028737	ENSSSCT00000005040, ENSSSCT00000029412, ENSSSCT00000031114, ENSSSCT00000055085	1:108414360-108515548:-1	ubiquitin specific peptidase 3	Cluster001
ENSSSCG00000029442	1	ENSSSCG00000029442	ENSSSCT00000022495, ENSSSCT00000029633, ENSSSCT00000038838, ENSSSCT00000039684, ENSSSCT00000040976, ENSSSCT00000042219, ENSSSCT00000048463, ENSSSCT00000049017, ENSSSCT00000057486, ENSSSCT00000060937	2:142505136-142527509:+1	protocadherin alpha-7	Cluster001
ENSSSCG00000029596	21	ENSSSCG00000029596	ENSSSCT00000023367, ENSSSCT00000027664, ENSSSCT00000029694, ENSSSCT00000045556, ENSSSCT00000045843, ENSSSCT00000047539, ENSSSCT00000049106, ENSSSCT00000050469, ENSSSCT00000052644, ENSSSCT00000066302	9:108703896-108784417:-1	No Class	Cluster001
ENSSSCG00000029600	180	ENSSSCG00000029600	ENSSSCT00000048655, ENSSSCT00000061031	6:46563766-46613353:-1	No Class	Cluster001
ENSSSCG00000030086	61	ENSSSCG00000030086	ENSSSCT00000029399	X:25136037-25242812:+1	No Class	Cluster001
ENSSSCG00000030112	376	ENSSSCG00000030112	ENSSSCT00000025218	17:22635204-22723444:+1	No Class	Cluster001
ENSSSCG00000031023	549	ENSSSCG00000031023	ENSSSCT00000036499	1:73119759-73124357:-1	No Class	Cluster001
ENSSSCG00000031288	155	ENSSSCG00000031288	ENSSSCT00000051741, ENSSSCT00000052960	11:49105823-49130543:+1	CLN5, intracellular trafficking protein	Cluster001
ENSSSCG00000031396	48	ENSSSCG00000031396	ENSSSCT00000042501, ENSSSCT00000050398	13:63428227-63432299:+1	No Class	Cluster001
ENSSSCG00000031589	353	ENSSSCG00000031589	ENSSSCT00000044725, ENSSSCT00000049342, ENSSSCT00000053763	14:60794333-60861636:-1	zinc finger protein 37A	Cluster001
ENSSSCG00000031636	64	ENSSSCG00000031636	ENSSSCT00000040558, ENSSSCT00000041138, ENSSSCT00000044700, ENSSSCT00000048302, ENSSSCT00000049842, ENSSSCT00000058558	8:40157270-40235093:+1	factor interacting with PAPOLA and CPSF1	Cluster001
ENSSSCG00000031796	35	ENSSSCG00000031796	ENSSSCT00000018435, ENSSSCT00000040281, ENSSSCT00000042915	16:37351677-37728507:+1	RAB3C, member RAS oncogene family	Cluster001
ENSSSCG00000031813	514	ENSSSCG00000031813	ENSSSCT00000055940	4:76062440-76382517:-1	No Class	Cluster001
ENSSSCG00000031855	343	ENSSSCG00000031855	ENSSSCT00000037140, ENSSSCT00000048445	AEMK02000574.1:21398-40449:+1	CUGBP Elav-like family member 2	Cluster001
ENSSSCG00000031943	430	ENSSSCG00000031943	ENSSSCT00000037625	9:97114844-97122476:+1	No Class	Cluster001
ENSSSCG00000031997	279	ENSSSCG00000031997	ENSSSCT00000065523	8:51576485-51579375:+1	No Class	Cluster001
ENSSSCG00000032196	81	ENSSSCG00000032196	ENSSSCT00000037046, ENSSSCT00000041476, ENSSSCT00000062348	6:61836686-61907723:+1	zinc finger protein 17-like	Cluster001
ENSSSCG00000032214	44	ENSSSCG00000032214	ENSSSCT00000054675, ENSSSCT00000059603	1:152593651-152636635:-1	suppressor of cytokine signaling 6	Cluster001
ENSSSCG00000032319	168	ENSSSCG00000032319	ENSSSCT00000039769	AEMK02000597.1:5880-32593:+1	No Class	Cluster001
ENSSSCG00000032522	94	ENSSSCG00000032522	ENSSSCT00000046472, ENSSSCT00000056213	15:121451383-121473540:+1	No Class	Cluster001
ENSSSCG00000032554	674	ENSSSCG00000032554	ENSSSCT00000065547	1:238641670-238642785:-1	solute carrier family 25 member 51	Cluster001
ENSSSCG00000032626	627	ENSSSCG00000032626	ENSSSCT00000060546	3:4826054-4848681:+1	alpha-2C adrenergic receptor-like	Cluster001
ENSSSCG00000032702	772	ENSSSCG00000032702	ENSSSCT00000045976, ENSSSCT00000057148, ENSSSCT00000057810	13:182134501-182188756:+1	CXADR, Ig-like cell adhesion molecule	Cluster001
ENSSSCG00000032937	215	ENSSSCG00000032937	ENSSSCT00000053822	3:46547550-46549917:+1	No Class	Cluster001
ENSSSCG00000032946	8	ENSSSCG00000032946	ENSSSCT00000045654	X:64540132-64617890:-1	high mobility group nucleosome binding domain 5	Cluster001
ENSSSCG00000032952	290	ENSSSCG00000032952	ENSSSCT00000038750	14:83317019-83317845:+1	No Class	Cluster001
ENSSSCG00000032969	99	ENSSSCG00000032969	ENSSSCT00000003604, ENSSSCT00000045748, ENSSSCT00000048196, ENSSSCT00000050476	6:58189335-58201899:+1	zinc finger protein 84-like	Cluster001
ENSSSCG00000032978	88	ENSSSCG00000032978	ENSSSCT00000052214, ENSSSCT00000058425, ENSSSCT00000065556	6:56998692-57024232:+1	zinc finger protein OZF-like	Cluster001
ENSSSCG00000033204	117	ENSSSCG00000033204	ENSSSCT00000052127, ENSSSCT00000061213	14:3295238-3501238:+1	contactin-associated protein-like 3	Cluster001
ENSSSCG00000033212	136	ENSSSCG00000033212	ENSSSCT00000047582	1:238326391-238333060:-1	translocase of outer mitochondrial membrane 5	Cluster001
ENSSSCG00000033390	134	ENSSSCG00000033390	ENSSSCT00000056485, ENSSSCT00000061814	3:38789978-38796514:+1	zinc finger protein 597	Cluster001
ENSSSCG00000033616	5	ENSSSCG00000033616	ENSSSCT00000049327, ENSSSCT00000062736, ENSSSCT00000065784	14:22477516-22502556:-1	zinc finger protein 10	Cluster001
ENSSSCG00000033786	142	ENSSSCG00000033786	ENSSSCT00000041686	2:44890124-44960999:+1	RAS related 2	Cluster001
ENSSSCG00000033871	117	ENSSSCG00000033871	ENSSSCT00000044544	8:83353254-83428674:+1	anaphase promoting complex subunit 10	Cluster001
ENSSSCG00000034253	371	ENSSSCG00000034253	ENSSSCT00000054248	7:80570424-80570975:-1	chromobox protein homolog 3	Cluster001
ENSSSCG00000034280	506	ENSSSCG00000034280	ENSSSCT00000042415, ENSSSCT00000048188, ENSSSCT00000049359, ENSSSCT00000053780, ENSSSCT00000054210, ENSSSCT00000061266, ENSSSCT00000064472	8:96751303-96856344:-1	La ribonucleoprotein domain family member 1B	Cluster001
ENSSSCG00000034442	65	ENSSSCG00000034442	ENSSSCT00000024161, ENSSSCT00000026437, ENSSSCT00000026903, ENSSSCT00000039672, ENSSSCT00000042533, ENSSSCT00000049056, ENSSSCT00000050053, ENSSSCT00000051778, ENSSSCT00000066278	8:66412150-66640734:-1	UDP-glucuronosyltransferase 2C1-like	Cluster001
ENSSSCG00000034540	100	ENSSSCG00000034540	ENSSSCT00000041056, ENSSSCT00000064528	6:57089528-57129251:-1	protein ZNF738-like	Cluster001
ENSSSCG00000034665	268	ENSSSCG00000034665	ENSSSCT00000055800	13:38542781-38544856:+1	No Class	Cluster001
ENSSSCG00000034765	498	ENSSSCG00000034765	ENSSSCT00000044264, ENSSSCT00000064401	6:97644177-97887602:+1	No Class	Cluster001
ENSSSCG00000034799	465	ENSSSCG00000034799	ENSSSCT00000054738	12:20974145-20974947:+1	No Class	Cluster001
ENSSSCG00000034927	1	ENSSSCG00000034927	ENSSSCT00000038834, ENSSSCT00000042551, ENSSSCT00000043632	3:18467779-18489661:+1	eukaryotic translation initiation factor 3 subunit C	Cluster001
ENSSSCG00000035013	563	ENSSSCG00000035013	ENSSSCT00000055121	17:39032143-39034326:+1	No Class	Cluster001
ENSSSCG00000035520	477	ENSSSCG00000035520	ENSSSCT00000042093	X:22068922-22069186:+1	No Class	Cluster001
ENSSSCG00000035788	10	ENSSSCG00000035788	ENSSSCT00000061434	6:57994333-58016149:-1	zinc finger protein 350	Cluster001
ENSSSCG00000035908	348	ENSSSCG00000035908	ENSSSCT00000054671	X:122592959-122599486:+1	high mobility group box 3	Cluster001
ENSSSCG00000036516	3	ENSSSCG00000036516	ENSSSCT00000015708, ENSSSCT00000045005, ENSSSCT00000049538, ENSSSCT00000054747, ENSSSCT00000055442	2:142843311-142861692:+1	protocadherin beta-4	Cluster001
ENSSSCG00000036554	30	ENSSSCG00000036554	ENSSSCT00000058883	6:62570087-62586094:+1	zinc finger protein 256	Cluster001
ENSSSCG00000036675	48	ENSSSCG00000036675	ENSSSCT00000059217	12:47131264-47133636:+1	No Class	Cluster001
ENSSSCG00000036707	22	ENSSSCG00000036707	ENSSSCT00000064520	18:42590416-42596182:+1	No Class	Cluster001
ENSSSCG00000036966	150	ENSSSCG00000036966	ENSSSCT00000059922	6:168629194-168633984:+1	small vasohibin binding protein	Cluster001
ENSSSCG00000037030	389	ENSSSCG00000037030	ENSSSCT00000009725, ENSSSCT00000044550, ENSSSCT00000050634, ENSSSCT00000066361	13:10715998-10720037:+1	ribosomal protein L15	Cluster001
ENSSSCG00000037396	3	ENSSSCG00000037396	ENSSSCT00000063132	5:21373392-21392547:+1	No Class	Cluster001
ENSSSCG00000037844	3	ENSSSCG00000037844	ENSSSCT00000060880	2:66265121-66265406:+1	No Class	Cluster001
ENSSSCG00000037849	207	ENSSSCG00000037849	ENSSSCT00000061163, ENSSSCT00000065250	X:108755875-108835797:-1	No Class	Cluster001
ENSSSCG00000038294	4	ENSSSCG00000038294	ENSSSCT00000045110	1:35693686-35694012:-1	No Class	Cluster001
ENSSSCG00000038527	195	ENSSSCG00000038527	ENSSSCT00000053025	1:9621068-9624056:+1	No Class	Cluster001
ENSSSCG00000038602	693	ENSSSCG00000038602	ENSSSCT00000004658, ENSSSCT00000061940	1:35694269-35775062:+1	SOGA family member 3	Cluster001
ENSSSCG00000038778	9	ENSSSCG00000038778	ENSSSCT00000056966	1:180061082-180061302:+1	No Class	Cluster001
ENSSSCG00000039175	576	ENSSSCG00000039175	ENSSSCT00000038105	8:52375515-52951042:-1	membrane associated ring-CH-type finger 1	Cluster001
ENSSSCG00000039222	665	ENSSSCG00000039222	ENSSSCT00000050105	16:6438917-6439603:+1	brain abundant membrane attached signal protein 1	Cluster001
ENSSSCG00000039320	1	ENSSSCG00000039320	ENSSSCT00000045736	7:114886828-114898911:+1	No Class	Cluster001
ENSSSCG00000039364	237	ENSSSCG00000039364	ENSSSCT00000042773	11:63001616-63199570:+1	No Class	Cluster001
ENSSSCG00000039544	182	ENSSSCG00000039544	ENSSSCT00000028532, ENSSSCT00000036755, ENSSSCT00000056750, ENSSSCT00000057256	14:80473928-80481209:+1	ribosomal protein S24	Cluster001
ENSSSCG00000039574	99	ENSSSCG00000039574	ENSSSCT00000047798	2:78040146-78135789:-1	No Class	Cluster001
ENSSSCG00000039778	408	ENSSSCG00000039778	ENSSSCT00000039932	8:8251531-8254080:+1	PRELI domain containing protein 3B-like	Cluster001
ENSSSCG00000039803	17	ENSSSCG00000039803	ENSSSCT00000040469	9:10541283-10542795:-1	No Class	Cluster001
ENSSSCG00000040047	119	ENSSSCG00000040047	ENSSSCT00000047714	7:39268255-39273390:+1	transmembrane protein 151B	Cluster001
ENSSSCG00000040688	488	ENSSSCG00000040688	ENSSSCT00000058294	6:62465106-62469988:+1	No Class	Cluster001
ENSSSCG00000040911	93	ENSSSCG00000040911	ENSSSCT00000059645	6:108635250-108639038:-1	No Class	Cluster001
EP300	18	ENSSSCG00000000068	ENSSSCT00000000074, ENSSSCT00000026332, XM_001929213	5:7312262-7373440:-1	E1A binding protein p300	Cluster001
EPB41L4A	122	ENSSSCG00000029860	ENSSSCT00000015527, ENSSSCT00000025962, ENSSSCT00000040986, ENSSSCT00000058846	2:117235465-117506024:+1	erythrocyte membrane protein band 4.1 like 4A	Cluster001
EPC1	708	ENSSSCG00000011028	ENSSSCT00000012070, ENSSSCT00000045008, ENSSSCT00000046192, ENSSSCT00000062300, XM_005668099, XM_005668100, XM_013980224, XM_021064807	10:42835287-42946864:-1	enhancer of polycomb homolog 1	Cluster001
EPC2	794	ENSSSCG00000027211	ENSSSCT00000017063, ENSSSCT00000028524, ENSSSCT00000042713, XM_021076082, XM_021076083	15:3417078-3526187:-1	enhancer of polycomb homolog 2	Cluster001
EPHA3	25	ENSSSCG00000026130	ENSSSCT00000022760, ENSSSCT00000040760, ENSSSCT00000044063, XM_021068363	13:166591686-166942921:-1	EPH receptor A3	Cluster001
EPHA4	51	ENSSSCG00000016230	ENSSSCT00000017672, XM_021074565	15:123358605-123503130:-1	EPH receptor A4	Cluster001
EPHA5	274	ENSSSCG00000008919	ENSSSCT00000009766, ENSSSCT00000027663, ENSSSCT00000043915, ENSSSCT00000062088, XM_013978746, XM_013978748, XM_013978750, XM_021101384, XM_021101385	8:63286378-63604734:-1	EPH receptor A5	Cluster001
EPHA7	352	ENSSSCG00000004336	ENSSSCT00000004792, ENSSSCT00000058715, XM_003480289, XM_005659300, XM_005659302, XM_021090161, XM_021090181	1:60770686-60944126:-1	EPH receptor A7	Cluster001
EPHB2	771	ENSSSCG00000003527	ENSSSCT00000003918, ENSSSCT00000028438, XM_005656047, XM_021095499, XM_021095501, XM_021095502	6:80649143-80843567:+1	EPH receptor B2	Cluster001
EPS8	59	ENSSSCG00000000600	ENSSSCT00000000645, ENSSSCT00000028702, ENSSSCT00000057743, XM_005664051, XM_021092303, XM_021092304	5:56817482-57005114:+1	epidermal growth factor receptor pathway substrate 8	Cluster001
ERBB4	38	ENSSSCG00000016160	ENSSSCT00000017595, ENSSSCT00000027992, ENSSSCT00000051064, XM_021075968	15:113974697-114696336:-1	erb-b2 receptor tyrosine kinase 4	Cluster001
ERC1	747	ENSSSCG00000000755	ENSSSCT00000000819, ENSSSCT00000039249, ENSSSCT00000047346, ENSSSCT00000048015, ENSSSCT00000058544, XM_005664112, XM_013997893, XM_013997896, XM_013997897, XM_021092970, XM_021092971, XM_021092972, XM_021092973, XM_021092974, XM_021092975, XM_021092976, XM_021092977, XM_021092978, XM_021092979, XM_021092980	5:68223294-68691230:+1	ELKS/RAB6-interacting/CAST family member 1	Cluster001
ERC2	303	ENSSSCG00000024417	ENSSSCT00000028128, ENSSSCT00000030632, ENSSSCT00000040948, ENSSSCT00000043453, ENSSSCT00000050909, ENSSSCT00000057815, ENSSSCT00000058828, ENSSSCT00000059180, ENSSSCT00000060784, ENSSSCT00000062614, XM_021070713, XM_021070715, XM_021070716, XM_021070717, XM_021070718, XM_021070719, XM_021070720, XM_021070721, XM_021070722, XM_021070723, XM_021070724, XM_021070726, XM_021070727, XM_021070728, XM_…	13:37388477-38367662:-1	ELKS/RAB6-interacting/CAST family member 2	Cluster001
ERCC5	2	.	XM_021065898	.	ERCC excision repair 5, endonuclease	Cluster001
ERCC6	89	ENSSSCG00000010391	ENSSSCT00000011375, XM_021073703	14:90002024-90070439:-1	ERCC excision repair 6, chromatin remodeling factor	Cluster001
ERCC8	556	ENSSSCG00000016934	ENSSSCT00000018442, ENSSSCT00000039701, ENSSSCT00000057189, XM_021077003, XM_021077004	16:39704605-39770315:-1	ERCC excision repair 8, CSA ubiquitin ligase complex subunit	Cluster001
ERG28	166	ENSSSCG00000036494	ENSSSCT00000065940	7:98811725-98821904:-1	ergosterol biosynthesis 28 homolog	Cluster001
ERGIC2	183	ENSSSCG00000000536	ENSSSCT00000000578, ENSSSCT00000059169, XM_005655651	5:44334180-44385313:+1	ERGIC and golgi 2	Cluster001
ERP44	134	ENSSSCG00000040634	ENSSSCT00000052989, ENSSSCT00000054954	1:241786194-241897664:-1	endoplasmic reticulum protein 44	Cluster001
ESF1	341	ENSSSCG00000007077	ENSSSCT00000007748, XM_001926068	17:22415580-22480697:-1	ESF1 nucleolar pre-rRNA processing protein homolog	Cluster001
ETF1	296	ENSSSCG00000014337	ENSSSCT00000015664, XM_003123975, XM_005661694	2:140469315-140504363:-1	eukaryotic translation termination factor 1	Cluster001
ETS1	12	ENSSSCG00000015235	ENSSSCT00000016601, ENSSSCT00000056799, ENSSSCT00000059987, XM_021101985, XM_021101987, XM_021101988, XM_021101989	9:55377266-55512247:-1	ETS proto-oncogene 1, transcription factor	Cluster001
EWSR1	145	ENSSSCG00000009974	ENSSSCT00000010930, ENSSSCT00000042498, ENSSSCT00000052999, ENSSSCT00000059527, ENSSSCT00000064974, XM_005657339, XM_005657340, XM_005657341, XM_005657342, XM_013990377, XM_013990378, XM_021072000, XM_021072001, XM_021072003, XM_021072004, XM_021072005	14:46408687-46442086:+1	EWS RNA binding protein 1	Cluster001
EXOC1	721	ENSSSCG00000023269	ENSSSCT00000024124, ENSSSCT00000031053, ENSSSCT00000038825, ENSSSCT00000043734, ENSSSCT00000054715, ENSSSCT00000055655, ENSSSCT00000060283, ENSSSCT00000062601, XM_003356946, XM_005666702, XM_005666704, XM_005666705, XM_005666706, XM_005666707, XM_013978732, XM_021101339, XM_021101340, XM_021101342, XM_021101343, XM_021101345, XM_021101346, XM_021101348, XM_021101349	8:55189324-55246528:+1	exocyst complex component 1	Cluster001
EXOC4	115	ENSSSCG00000016543	ENSSSCT00000018013, XM_021078822	18:15109324-15906714:-1	exocyst complex component 4	Cluster001
EXOC5	557	ENSSSCG00000005066	ENSSSCT00000005583, ENSSSCT00000040330, XM_021102546	1:186377519-186430107:-1	exocyst complex component 5	Cluster001
EXOC6	429	ENSSSCG00000010473	ENSSSCT00000011461, ENSSSCT00000032502, ENSSSCT00000042930, ENSSSCT00000051724, XM_021073792, XM_021073793, XM_021073794, XM_021073795	14:104327026-104550642:+1	exocyst complex component 6	Cluster001
EXOC7	22	ENSSSCG00000017190	ENSSSCT00000018715, ENSSSCT00000041668, ENSSSCT00000057992, XM_003357960, XM_003357961, XM_003357964, XM_005656924, XM_021066601	12:5325073-5356962:+1	exocyst complex component 7	Cluster001
EXOSC10	440	ENSSSCG00000003412	ENSSSCT00000003785, XM_013998976	6:71256920-71282493:-1	exosome component 10	Cluster001
EXOSC2	4	ENSSSCG00000005704	ENSSSCT00000006273, XM_013993938, XM_021070299	1:270748537-270757703:+1	exosome component 2	Cluster001
EXOSC9	350	ENSSSCG00000009096	ENSSSCT00000009962, ENSSSCT00000042972, ENSSSCT00000053634, XM_021101636	8:102264470-102303842:-1	exosome component 9	Cluster001
EXT1	3	ENSSSCG00000006009	ENSSSCT00000006593, XM_001924980	4:20645038-20935759:+1	exostosin glycosyltransferase 1	Cluster001
EYA3	2	ENSSSCG00000003580	ENSSSCT00000003975, ENSSSCT00000024325, ENSSSCT00000038041, ENSSSCT00000052478, XM_021095661	6:85095413-85185861:-1	EYA transcriptional coactivator and phosphatase 3	Cluster001
FABP3	53	ENSSSCG00000036883	ENSSSCT00000044750	6:87941137-87951610:-1	fatty acid binding protein 3	Cluster001
FABP5	35	ENSSSCG00000006153	ENSSSCT00000006747, ENSSSCT00000054753	4:55276621-55282908:-1	fatty acid binding protein 5	Cluster001
FABP7	165	ENSSSCG00000004234	ENSSSCT00000004679, ENSSSCT00000038263	1:39871298-39876298:-1	fatty acid binding protein 7	Cluster001
FAF1	323	ENSSSCG00000003877	ENSSSCT00000004289, ENSSSCT00000036500, ENSSSCT00000056458, XM_021097816, XM_021097817	6:161166981-161603725:+1	Fas associated factor 1	Cluster001
FAF2	22	ENSSSCG00000014057	ENSSSCT00000015356, ENSSSCT00000061961, XM_003123660, XM_005661467, XM_005661468	2:81401859-81464849:-1	Fas associated factor family member 2	Cluster001
FAM110B	232	ENSSSCG00000006240	ENSSSCT00000006838	4:74612890-74614005:-1	family with sequence similarity 110 member B	Cluster001
FAM117B	385	ENSSSCG00000016114	ENSSSCT00000017545, XM_013984393	15:106183404-106280707:+1	family with sequence similarity 117 member B	Cluster001
FAM122A	9	.	XM_021085089	.	family with sequence similarity 122A	Cluster001
FAM124A	500	ENSSSCG00000029598	ENSSSCT00000028001, ENSSSCT00000047858, ENSSSCT00000058225, XM_001925721	11:16572302-16658103:-1	family with sequence similarity 124 member A	Cluster001
FAM126A	302	ENSSSCG00000015386	ENSSSCT00000016761, ENSSSCT00000022993, XM_005656687, XM_013989579	9:91729060-91821619:-1	family with sequence similarity 126 member A	Cluster001
FAM133B	25	.	XM_005667601, XM_013979689	.	family with sequence similarity 133 member B	Cluster001
FAM135A	754	ENSSSCG00000004275	ENSSSCT00000004725, ENSSSCT00000045995, ENSSSCT00000048904, ENSSSCT00000054799, ENSSSCT00000060012, ENSSSCT00000062959, ENSSSCT00000064116, XM_003353241, XM_005659250, XM_013992626, XM_021089377, XM_021089387, XM_021089417, XM_021089429, XM_021089434, XM_021089438	1:50579715-50716186:+1	family with sequence similarity 135 member A	Cluster001
FAM13B	193	ENSSSCG00000029125	ENSSSCT00000029775, ENSSSCT00000038786, ENSSSCT00000041691, ENSSSCT00000043309, ENSSSCT00000043549, ENSSSCT00000046408, ENSSSCT00000046424, ENSSSCT00000047010, XM_021084802, XM_021084803, XM_021084804, XM_021084805, XM_021084806, XM_021084807, XM_021084808, XM_021084809, XM_021084811, XM_021084812, XM_021084813, XM_021084814, XM_021084815, XM_021084816, XM_021084817, XM_021084818, XM_021084819, X…	2:139957613-140073621:-1	family with sequence similarity 13 member B	Cluster001
FAM160B1	117	ENSSSCG00000010652	ENSSSCT00000011651, XM_001929362	14:125158266-125196249:+1	family with sequence similarity 160 member B1	Cluster001
FAM171A2	473	ENSSSCG00000017356	ENSSSCT00000018894, XM_021066865, XM_021066866, XM_021066867	12:18881437-18895957:+1	family with sequence similarity 171 member A2	Cluster001
FAM184A	507	ENSSSCG00000004245	ENSSSCT00000004692, ENSSSCT00000037145, ENSSSCT00000046216, ENSSSCT00000058756, XM_021088983, XM_021088987, XM_021088991, XM_021088992, XM_021089003, XM_021089008, XM_021089011	1:43003350-43113371:+1	family with sequence similarity 184 member A	Cluster001
FAM200A	584	ENSSSCG00000029175	ENSSSCT00000030995, XM_013995389	3:6493790-6495103:-1	family with sequence similarity 200 member A	Cluster001
FAM200B	291	.	XM_005666534	.	family with sequence similarity 200 member B	Cluster001
FAM208A	576	.	XM_003358482, XM_003358484, XM_013981800, XM_021068979	.	family with sequence similarity 208 member A	Cluster001
FAM35A	45	.	XM_003483513, XM_021073589, XM_021073591, XM_021073592, XM_021073593, XM_021073594, XM_021073595	.	family with sequence similarity 35 member A	Cluster001
FAM3C	23	ENSSSCG00000016616	ENSSSCT00000018090, ENSSSCT00000047128, ENSSSCT00000062708, XM_003134737	18:25569383-25612740:+1	family with sequence similarity 3 member C	Cluster001
FAM43B	378	ENSSSCG00000030706	ENSSSCT00000032584, XM_003356177	6:78788545-78794367:+1	family with sequence similarity 43 member B	Cluster001
FAM49A	504	ENSSSCG00000008617	ENSSSCT00000009428, ENSSSCT00000050263, XM_003125345, XM_005662738, XM_013996336	3:120967153-121069907:+1	family with sequence similarity 49 member A	Cluster001
FAM49B	456	ENSSSCG00000005959	ENSSSCT00000006542, ENSSSCT00000036789, ENSSSCT00000040188, ENSSSCT00000049357, ENSSSCT00000049585, ENSSSCT00000054703, ENSSSCT00000065443, XM_021088603, XM_021088604, XM_021088605, XM_021088606, XM_021088607, XM_021088608, XM_021088609, XM_021088610, XM_021088611, XM_021088612, XM_021088613, XM_021088615, XM_021088616, XM_021088617, XM_021088618, XM_021088619, XM_021088620, XM_021088621, XM_0210…	4:10476098-10645272:+1	family with sequence similarity 49 member B	Cluster001
FAM76B	595	ENSSSCG00000014967	ENSSSCT00000016328, XM_003129793, XM_013979298, XM_013979299	9:27790141-27812222:-1	family with sequence similarity 76 member B	Cluster001
FAM81A	571	ENSSSCG00000004586	ENSSSCT00000005065, ENSSSCT00000036706, ENSSSCT00000062699, XM_001928540, XM_005659549, XM_021073520, XM_021073532, XM_021073534	1:112548258-112677732:-1	family with sequence similarity 81 member A	Cluster001
FAM89B	581	ENSSSCG00000035604	ENSSSCT00000037657, XM_021082853	2:6679123-6682369:-1	family with sequence similarity 89 member B	Cluster001
FAM92A	217	.	XM_005662973, XM_013996613	.	family with sequence similarity 92 member A	Cluster001
FAR2	413	ENSSSCG00000000541	ENSSSCT00000000584, ENSSSCT00000037760, ENSSSCT00000046249, ENSSSCT00000049881, ENSSSCT00000056570, XM_003355533, XM_021092128	5:44381129-44559352:-1	fatty acyl-CoA reductase 2	Cluster001
FARP1	417	ENSSSCG00000026863	ENSSSCT00000026699, ENSSSCT00000030682, XM_021065374, XM_021065375, XM_021065376, XM_021065377, XM_021065378	11:67181965-67457548:+1	FERM, ARH/RhoGEF and pleckstrin domain protein 1	Cluster001
FARSB	26	.	XM_021074819, XM_021074820	.	phenylalanyl-tRNA synthetase beta subunit	Cluster001
FAT4	429	ENSSSCG00000036155	ENSSSCT00000056583, XM_021101611	8:99149641-99310519:-1	FAT atypical cadherin 4	Cluster001
FBLIM1	366	ENSSSCG00000003465	ENSSSCT00000003851, ENSSSCT00000039076, ENSSSCT00000055492, ENSSSCT00000062531, XM_003127630, XM_005656021	6:74931820-74962295:+1	filamin binding LIM protein 1	Cluster001
FBXL19	505	ENSSSCG00000028186	ENSSSCT00000024499, XM_005655082, XM_005655083, XM_013987713, XM_021086408	3:17499070-17517224:-1	F-box and leucine rich repeat protein 19	Cluster001
FBXL3	3	ENSSSCG00000009472	ENSSSCT00000010385, ENSSSCT00000039556, ENSSSCT00000059559, XM_003357868	11:49131434-49151026:-1	F-box and leucine rich repeat protein 3	Cluster001
FBXL5	60	ENSSSCG00000008740	ENSSSCT00000009562, ENSSSCT00000042753, ENSSSCT00000049120, ENSSSCT00000051846, XM_013978532, XM_021101020, XM_021101021	8:10915398-10987372:-1	F-box and leucine rich repeat protein 5	Cluster001
FBXO11	440	ENSSSCG00000029485	ENSSSCT00000028062	3:92696409-92792621:+1	F-box protein 11	Cluster001
FCHSD2	8	ENSSSCG00000014820	ENSSSCT00000016171, ENSSSCT00000016172, ENSSSCT00000036874, ENSSSCT00000045122, ENSSSCT00000050819, ENSSSCT00000052721, ENSSSCT00000054692, ENSSSCT00000056641, ENSSSCT00000058970, XM_021102286, XM_021102287, XM_021102289, XM_021102290, XM_021102292	9:7366522-7619926:-1	FCH and double SH3 domains 2	Cluster001
FEM1B	420	ENSSSCG00000022419	ENSSSCT00000031923, XM_003121751	1:166162545-166178075:+1	fem-1 homolog B	Cluster001
FEM1C	9	ENSSSCG00000014217	ENSSSCT00000015535, ENSSSCT00000041545, ENSSSCT00000051904, XM_021084648, XM_021084651	2:119699598-119722902:-1	fem-1 homolog C	Cluster001
FER	250	ENSSSCG00000027074	ENSSSCT00000015505, ENSSSCT00000024375, ENSSSCT00000050072, ENSSSCT00000050549, XM_021084606, XM_021084608, XM_021084610, XM_021084611	2:113822532-114206930:+1	FER tyrosine kinase	Cluster001
FERMT2	443	ENSSSCG00000005041	ENSSSCT00000005557, ENSSSCT00000047893, ENSSSCT00000060621, XM_021102060, XM_021102069, XM_021102080, XM_021102091, XM_021102100, XM_021102109, XM_021102113, XM_021102118, XM_021102124, XM_021102125, XM_021102128, XM_021102137	1:182519684-182606869:-1	fermitin family member 2	Cluster001
FGF13	139	.	XM_003135427, XM_021080530, XM_021080531, XM_021080533, XM_021080534	.	fibroblast growth factor 13	Cluster001
FHOD3	138	ENSSSCG00000027935	ENSSSCT00000023176, ENSSSCT00000025775, ENSSSCT00000029253, ENSSSCT00000038204, ENSSSCT00000042323, ENSSSCT00000058682, XM_021096273, XM_021096274, XM_021096275, XM_021096276, XM_021096277, XM_021096278, XM_021096280, XM_021096281, XM_021096282, XM_021096283, XM_021096285	6:120036818-120586816:+1	formin homology 2 domain containing 3	Cluster001
FIBCD1	273	ENSSSCG00000005707	ENSSSCT00000006276, XM_003122239, XM_021070324	1:270918248-270956290:-1	fibrinogen C domain containing 1	Cluster001
FIG4	100	ENSSSCG00000004405	ENSSSCT00000004868, ENSSSCT00000031596, ENSSSCT00000047387, XM_021068077, XM_021068153, XM_021068183, XM_021068230	1:75693531-75847515:+1	FIG4 phosphoinositide 5-phosphatase	Cluster001
FIP1L1	265	.	XM_021101227, XM_021101229, XM_021101230, XM_021101231, XM_021101232, XM_021101233, XM_021101234, XM_021101235, XM_021101236, XM_021101237, XM_021101238, XM_021101240, XM_021101241, XM_021101242, XM_021101243, XM_021101244, XM_021101245, XM_021101246, XM_021101247, XM_021101248, XM_021101249, XM_021101250, XM_021101251, XM_021101252, XM_021101253, XM_021101254, XM_021101256, XM_021101257, XM_0211…	.	factor interacting with PAPOLA and CPSF1	Cluster001
FLRT2	329	ENSSSCG00000040166	ENSSSCT00000059328, ENSSSCT00000061503, XM_021099586, XM_021099588, XM_021099589, XM_021099590	7:107812613-107913620:+1	fibronectin leucine rich transmembrane protein 2	Cluster001
FMR1	382	ENSSSCG00000012727	ENSSSCT00000013914, ENSSSCT00000034989, ENSSSCT00000035645, ENSSSCT00000036178, ENSSSCT00000036460, XM_001925732, XM_003360469, XM_003360470, XM_005673954, XM_005673955, XM_005673956, XM_005673957, XM_005673958, XM_005673959, XM_005673960, XM_005673961, XM_021080769, XM_021080770, XM_021080772	X:120361162-120400388:+1	fragile X mental retardation 1	Cluster001
FNBP1L	743	ENSSSCG00000006894	ENSSSCT00000007549, ENSSSCT00000050092, ENSSSCT00000054664, ENSSSCT00000063793, XM_005663661, XM_005663662, XM_021090187	4:123674697-123779615:-1	formin binding protein 1 like	Cluster001
FNBP4	137	ENSSSCG00000030610	ENSSSCT00000029478, ENSSSCT00000038094, ENSSSCT00000052525	2:14896175-14932207:+1	formin binding protein 4	Cluster001
FOCAD	2	ENSSSCG00000028406	ENSSSCT00000005693, ENSSSCT00000028872, ENSSSCT00000041034, ENSSSCT00000044086, ENSSSCT00000055841, ENSSSCT00000056267, ENSSSCT00000060666, XM_021063102, XM_021063107, XM_021063113, XM_021063125, XM_021063132, XM_021063140, XM_021063146	1:201880712-202259322:-1	focadhesin	Cluster001
FOXG1	272	ENSSSCG00000033761	ENSSSCT00000060490	7:70658685-70660145:-1	forkhead box G1	Cluster001
FOXJ3	623	ENSSSCG00000023266	ENSSSCT00000024723, ENSSSCT00000031628, ENSSSCT00000038171, XM_021096927, XM_021096928, XM_021096930, XM_021096932, XM_021096933, XM_021096934, XM_021096936	6:168994463-169135040:+1	forkhead box J3	Cluster001
FOXK2	47	ENSSSCG00000017125	ENSSSCT00000018643, XM_003357920, XM_013989821, XM_021066336	12:561589-615747:-1	forkhead box K2	Cluster001
FOXP1	649	.	XM_021070838, XM_021070839, XM_021070840, XM_021070841, XM_021070842, XM_021070843, XM_021070844, XM_021070845, XM_021070846, XM_021070847, XM_021070848, XM_021070849, XM_021070850, XM_021070851	.	forkhead box P1	Cluster001
FRA10AC1	484	ENSSSCG00000024359	ENSSSCT00000031763, ENSSSCT00000043737, ENSSSCT00000064837, XM_005671290, XM_005671293, XM_005671294, XM_013983566, XM_013983569, XM_021072007	14:105125153-105169866:-1	fragile site, folic acid type, rare, fra(10)(q23.3) or fra(10)(q24.2) candidate 1	Cluster001
FRMD4A	230	ENSSSCG00000011056	ENSSSCT00000012100, ENSSSCT00000041277, ENSSSCT00000051237, ENSSSCT00000057676, ENSSSCT00000062939, XM_021064213, XM_021064214, XM_021064215, XM_021064216, XM_021064217, XM_021064219, XM_021064221, XM_021064222, XM_021064223, XM_021064224, XM_021064226, XM_021064227, XM_021064228	10:47671219-48049633:+1	FERM domain containing 4A	Cluster001
FSD1	105	ENSSSCG00000013505	ENSSSCT00000014752, ENSSSCT00000041789, XM_003480828, XM_021084065	2:74468739-74485807:-1	fibronectin type III and SPRY domain containing 1	Cluster001
FSD1L	662	ENSSSCG00000005426	ENSSSCT00000005969, ENSSSCT00000037365, ENSSSCT00000044406, ENSSSCT00000051125, ENSSSCT00000052340, XM_003480570, XM_005660313	1:246768147-246849032:+1	fibronectin type III and SPRY domain containing 1 like	Cluster001
FSIP1	156	ENSSSCG00000040418	ENSSSCT00000058778, XM_005659760, XM_021097949, XM_021097959	1:131509813-131717097:+1	fibrous sheath interacting protein 1	Cluster001
FUBP1	369	.	XM_003127917, XM_005665367, XM_013999331, XM_013999334, XM_013999338, XM_021096426, XM_021096428, XM_021096429, XM_021096430, XM_021096431, XM_021096432, XM_021096433, XM_021096434, XM_021096436, XM_021096437, XM_021096438	.	far upstream element binding protein 1	Cluster001
FXN	109	ENSSSCG00000032999	ENSSSCT00000052420, XM_021064638	1:222412278-222455733:+1	frataxin	Cluster001
FXYD6	60	ENSSSCG00000015083	ENSSSCT00000016449, ENSSSCT00000057720, XM_005656632, XM_005656633, XM_005656634, XM_005656636	9:45182400-45217783:-1	FXYD domain containing ion transport regulator 6	Cluster001
FYN	13	ENSSSCG00000004421	ENSSSCT00000004884, ENSSSCT00000004885, ENSSSCT00000004886, ENSSSCT00000034071, ENSSSCT00000034742, ENSSSCT00000036277, XM_021084347, XM_021084350, XM_021084361, XM_021084373	1:77584483-77810575:-1	FYN proto-oncogene, Src family tyrosine kinase	Cluster001
FZD3	111	ENSSSCG00000009679	ENSSSCT00000010613, ENSSSCT00000041748, ENSSSCT00000057031, ENSSSCT00000061871, XM_013982684, XM_021072308	14:12281098-12387425:+1	frizzled class receptor 3	Cluster001
G2E3	28	ENSSSCG00000001974	ENSSSCT00000002207, ENSSSCT00000037099, ENSSSCT00000058731, XM_001927793, XM_013989056	7:68852777-68917062:-1	G2/M-phase specific E3 ubiquitin protein ligase	Cluster001
GABBR2	124	ENSSSCG00000027558	ENSSSCT00000025444, XM_021066509	1:240107466-240496230:-1	gamma-aminobutyric acid type B receptor subunit 2	Cluster001
GABPB1	267	ENSSSCG00000004645	ENSSSCT00000005130, ENSSSCT00000040971, ENSSSCT00000053221, ENSSSCT00000059948, XM_001928218, XM_003480365, XM_005659620, XM_013993007, XM_021095667, XM_021095672, XM_021095676, XM_021095682, XM_021095701, XM_021095723, XM_021095726	1:121412982-121488366:+1	GA binding protein transcription factor beta subunit 1	Cluster001
GABPB2	242	.	XM_003125771, XM_005663477, XM_005663478, XM_005663479, XM_005663480, XM_005663481, XM_005663482, XM_021089886, XM_021089887, XM_021089888, XM_021089889	.	GA binding protein transcription factor beta subunit 2	Cluster001
GABRA3	371	ENSSSCG00000025708	ENSSSCT00000024798, ENSSSCT00000040116, ENSSSCT00000055760, XM_021079996, XM_021079998, XM_021080000	X:123456953-123685457:-1	gamma-aminobutyric acid type A receptor alpha3 subunit	Cluster001
GABRB3	144	ENSSSCG00000038547	ENSSSCT00000018541, ENSSSCT00000022646, ENSSSCT00000048656, ENSSSCT00000063711, XM_021098607, XM_021098613, XM_021098621, XM_021098629	1:140566287-140907748:+1	gamma-aminobutyric acid type A receptor beta3 subunit	Cluster001
GABRG3	92	.	XM_021098602	.	gamma-aminobutyric acid type A receptor gamma3 subunit	Cluster001
GADD45GIP1	110	ENSSSCG00000034859	ENSSSCT00000062749, ENSSSCT00000065145, XM_003123339	2:66077074-66091766:+1	GADD45G interacting protein 1	Cluster001
GALNT1	160	ENSSSCG00000003743	ENSSSCT00000004144, ENSSSCT00000032735, XM_003482057, XM_021096269, XM_021096270	6:119357006-119493897:+1	polypeptide N-acetylgalactosaminyltransferase 1	Cluster001
GALNTL5	71	ENSSSCG00000016431	ENSSSCT00000017892, XM_003134544, XM_013983525, XM_013983528, XM_013983534, XM_021078622, XM_021078623, XM_021078624, XM_021078625, XM_021078626	18:5353817-5438227:-1	polypeptide N-acetylgalactosaminyltransferase-like 5	Cluster001
GAP43	480	ENSSSCG00000031244	ENSSSCT00000040414	13:144361490-144457938:-1	growth associated protein 43	Cluster001
GAREM1	55	ENSSSCG00000003731	ENSSSCT00000004131, XM_003482054, XM_021096217, XM_021096218, XM_021096219	6:116100370-116325133:-1	GRB2 associated regulator of MAPK1 subtype 1	Cluster001
GARS	250	ENSSSCG00000016677	ENSSSCT00000018157, XM_003134806	18:42308997-42352042:-1	glycyl-tRNA synthetase	Cluster001
GCFC2	237	ENSSSCG00000021287	ENSSSCT00000023923, ENSSSCT00000031635, ENSSSCT00000064852, XM_021087312, XM_021087313, XM_021087314, XM_021087315	3:67547769-67593915:+1	GC-rich sequence DNA-binding factor 2	Cluster001
GDAP1L1	484	ENSSSCG00000007373	ENSSSCT00000008071, ENSSSCT00000045357, XM_003360003	17:46708885-46737784:+1	ganglioside induced differentiation associated protein 1 like 1	Cluster001
GFM2	94	ENSSSCG00000014074	ENSSSCT00000015375, ENSSSCT00000049604, ENSSSCT00000059770, XM_021084448	2:83779427-83843827:-1	G elongation factor mitochondrial 2	Cluster001
GGCT	270	.	XM_003361374, XM_003361377, XM_005658559	.	gamma-glutamylcyclotransferase	Cluster001
GIGYF2	496	ENSSSCG00000016291	ENSSSCT00000017740, ENSSSCT00000026011, ENSSSCT00000039204, ENSSSCT00000057947, ENSSSCT00000060359, XM_021075626, XM_021075628, XM_021075629, XM_021075630, XM_021075631, XM_021075632, XM_021075633, XM_021075634	15:133180522-133311516:+1	GRB10 interacting GYF protein 2	Cluster001
GJD2	502	ENSSSCG00000036219	ENSSSCT00000040219, XM_001924757, XM_021098274, XM_021098276, XM_021098279, XM_021098284, XM_021098285, XM_021098289, XM_021098291, XM_021098293, XM_021098296, XM_021098300	1:136323803-136329188:+1	gap junction protein delta 2	Cluster001
GK5	7	ENSSSCG00000011677	ENSSSCT00000012783, ENSSSCT00000055833, ENSSSCT00000059059, ENSSSCT00000059628, XM_003483257, XM_021069567, XM_021069569	13:82947740-83036424:-1	glycerol kinase 5 (putative)	Cluster001
GLCCI1	38	ENSSSCG00000015345	ENSSSCT00000016718, ENSSSCT00000044291, ENSSSCT00000066070, XM_021102418	9:77915026-78334082:+1	glucocorticoid induced 1	Cluster001
GLMN	194	ENSSSCG00000006904	ENSSSCT00000007560, ENSSSCT00000007561, ENSSSCT00000033937, ENSSSCT00000035642, XM_021090232, XM_021090233, XM_021090234, XM_021090235, XM_021090236, XM_021090237	4:124773964-124813323:+1	glomulin, FKBP associated protein	Cluster001
GLRX	516	.	XM_005654989	.	glutaredoxin	Cluster001
GLYR1	739	ENSSSCG00000007931	ENSSSCT00000008693, ENSSSCT00000030382, ENSSSCT00000041735, XM_003354620, XM_013995678	3:37555339-37594080:+1	glyoxylate reductase 1 homolog	Cluster001
GMEB1	64	ENSSSCG00000038872	ENSSSCT00000043716, ENSSSCT00000052521, ENSSSCT00000060437, XM_021095680, XM_021095681, XM_021095683, XM_021095684, XM_021095685, XM_021095686, XM_021095687	6:85657523-85701386:+1	glucocorticoid modulatory element binding protein 1	Cluster001
GMPS	93	ENSSSCG00000028855	ENSSSCT00000025813, ENSSSCT00000048788, XM_013982155, XM_021069704, XM_021069705	13:95737926-95819671:+1	guanine monophosphate synthase	Cluster001
GNAI1	20	ENSSSCG00000015407	ENSSSCT00000016782, XM_021063494	9:100185860-100272279:-1	G protein subunit alpha i1	Cluster001
GNAI3	311	ENSSSCG00000006824	ENSSSCT00000007475, XM_005663586	4:110527711-110579336:-1	G protein subunit alpha i3	Cluster001
GNAQ	715	ENSSSCG00000033763	ENSSSCT00000057300	1:230605256-230907674:-1	G protein subunit alpha q	Cluster001
GNAZ	530	ENSSSCG00000010046	ENSSSCT00000011007, ENSSSCT00000055930, XM_021072293, XM_021072294	14:49132158-49174798:+1	G protein subunit alpha z	Cluster001
GNB1	530	ENSSSCG00000021890	ENSSSCT00000025244, ENSSSCT00000042474, ENSSSCT00000043769, ENSSSCT00000055030, ENSSSCT00000060084, XM_021097490, XM_021097491, XM_021097492, XM_021097493, XM_021097494, XM_021097495	6:63863996-63954126:-1	G protein subunit beta 1	Cluster001
GNE	69	ENSSSCG00000037468	ENSSSCT00000055202, ENSSSCT00000058473, ENSSSCT00000063939, XM_021083986, XM_021083996	1:236998757-237065767:-1	glucosamine (UDP-N-acetyl)-2-epimerase/N-acetylmannosamine kinase	Cluster001
GNG2	159	ENSSSCG00000028092	ENSSSCT00000029733, ENSSSCT00000040747, XM_021101893, XM_021101896, XM_021101900	1:181516174-181651967:+1	G protein subunit gamma 2	Cluster001
GNL2	473	ENSSSCG00000031631	ENSSSCT00000045663, XM_021095967, XM_021095968	6:93616575-93646019:-1	G protein nucleolar 2	Cluster001
GNPAT	22	ENSSSCG00000010175	ENSSSCT00000011141, ENSSSCT00000044821	14:59203519-59241298:-1	glyceronephosphate O-acyltransferase	Cluster001
GNPTAB	419	ENSSSCG00000000862	ENSSSCT00000000941, ENSSSCT00000028915, ENSSSCT00000065519, XM_021092662, XM_021092663, XM_021092664, XM_021092665, XM_021092666, XM_021092667, XM_021092668, XM_021092669, XM_021092670, XM_021092671, XM_021092672, XM_021092674, XM_021092675, XM_021092676	5:82361906-82460814:+1	N-acetylglucosamine-1-phosphate transferase alpha and beta subunits	Cluster001
GNRHR2	42	.	XM_021088735, XM_021088736	.	gonadotropin-releasing hormone (type 2) receptor 2	Cluster001
GOLGA1	49	ENSSSCG00000005597	ENSSSCT00000006155, XM_005654558, XM_013986672, XM_013986679	1:265655021-265705872:-1	golgin A1	Cluster001
GOLGA4	93	ENSSSCG00000011243	ENSSSCT00000012310, XM_005652395	13:22146486-22244300:+1	golgin A4	Cluster001
GOLGB1	53	ENSSSCG00000011882	ENSSSCT00000012998, XM_021070274	13:138771381-138845995:+1	golgin B1	Cluster001
GOLM1	200	ENSSSCG00000010955	ENSSSCT00000011991, ENSSSCT00000049848, ENSSSCT00000056638, XM_021064634, XM_021064636	10:29117567-29219508:+1	golgi membrane protein 1	Cluster001
GORAB	57	ENSSSCG00000006280	ENSSSCT00000006880, XM_003481403, XM_021089423	4:80569860-80590960:-1	golgin, RAB6 interacting	Cluster001
GORASP2	225	ENSSSCG00000015943	ENSSSCT00000017360, XM_021074828	15:77099001-77130656:+1	golgi reassembly stacking protein 2	Cluster001
GPATCH11	373	ENSSSCG00000008497	ENSSSCT00000009299, XM_003125237, XM_005662630, XM_005662631, XM_021087631	3:103096182-103112030:-1	G-patch domain containing 11	Cluster001
GPATCH2	271	ENSSSCG00000027207	ENSSSCT00000025633, ENSSSCT00000039960, ENSSSCT00000044388, XM_021064098, XM_021064099, XM_021064100, XM_021064102, XM_021064104, XM_021064105	10:7615592-7797378:-1	G-patch domain containing 2	Cluster001
GPATCH2L	105	ENSSSCG00000002387	ENSSSCT00000002654, ENSSSCT00000041128, ENSSSCT00000044164, ENSSSCT00000054806, ENSSSCT00000056751, ENSSSCT00000065736, XM_005666353, XM_021097999	7:99325558-99375831:+1	G-patch domain containing 2 like	Cluster001
GPBP1	393	ENSSSCG00000016922	ENSSSCT00000018429, ENSSSCT00000047569, XM_003133975, XM_005672465, XM_005672467, XM_005672468, XM_021076981, XM_021076982, XM_021076984, XM_021076985	16:36217248-36299629:+1	GC-rich promoter binding protein 1	Cluster001
GPN3	494	ENSSSCG00000009820	ENSSSCT00000010763	14:31836741-31849589:-1	GPN-loop GTPase 3	Cluster001
GPR12	671	ENSSSCG00000009301	ENSSSCT00000010189	11:4426797-4427953:-1	G protein-coupled receptor 12	Cluster001
GPR143	9	.	XM_003360225, XM_021080271	.	G protein-coupled receptor 143	Cluster001
GPR161	199	ENSSSCG00000006302	ENSSSCT00000006907, XM_021089473, XM_021089474, XM_021089475	4:82873417-82905476:+1	G protein-coupled receptor 161	Cluster001
GPR27	561	ENSSSCG00000036580	ENSSSCT00000051312	13:53152062-53153192:+1	G protein-coupled receptor 27	Cluster001
GPR82	95	ENSSSCG00000012254	ENSSSCT00000013400, XM_021079414	X:37328682-37334139:+1	G protein-coupled receptor 82	Cluster001
GPR85	208	ENSSSCG00000016642	ENSSSCT00000018120, ENSSSCT00000041887, XM_013985694, XM_013985695, XM_013985696	18:32667513-32672741:+1	G protein-coupled receptor 85	Cluster001
GPRIN1	383	ENSSSCG00000014054	ENSSSCT00000015353, XM_021084418	2:81315368-81318382:+1	G protein regulated inducer of neurite outgrowth 1	Cluster001
GPRIN3	1	ENSSSCG00000039821	ENSSSCT00000043127, XM_021101761	8:129867164-129869489:+1	GPRIN family member 3	Cluster001
GPSM1	418	ENSSSCG00000039487	ENSSSCT00000043385, ENSSSCT00000056239, XM_021081153	AEMK02000682.1:1355302-1386137:-1	G protein signaling modulator 1	Cluster001
GRAMD1A	20	ENSSSCG00000002879	ENSSSCT00000003181, XM_005664473	6:44576948-44593804:+1	GRAM domain containing 1A	Cluster001
GRB14	386	ENSSSCG00000015901	ENSSSCT00000017314, ENSSSCT00000041677, ENSSSCT00000046043, ENSSSCT00000061663, XM_021075428	15:71119929-71247449:-1	growth factor receptor bound protein 14	Cluster001
GRID2	50	ENSSSCG00000009197	ENSSSCT00000010070, ENSSSCT00000031108, XM_021100736	8:125819941-126451187:-1	glutamate ionotropic receptor delta type subunit 2	Cluster001
GRIK2	28	ENSSSCG00000004361	ENSSSCT00000004819, ENSSSCT00000032833, XM_021073336, XM_021073345, XM_021073346, XM_021073356, XM_021073366, XM_021073376, XM_021073385	1:68289343-68679256:+1	glutamate ionotropic receptor kainate type subunit 2	Cluster001
GRIN2B	361	ENSSSCG00000000614	ENSSSCT00000000660, ENSSSCT00000061900, XM_021092315, XM_021092316, XM_021092317, XM_021092319, XM_021092320	5:58480191-58927558:+1	glutamate ionotropic receptor NMDA type subunit 2B	Cluster001
GRIN3A	519	ENSSSCG00000005400	ENSSSCT00000005943, ENSSSCT00000039649, ENSSSCT00000048976, XM_021066896, XM_021066913	1:243259495-243415923:-1	glutamate ionotropic receptor NMDA type subunit 3A	Cluster001
GRIP1	820	ENSSSCG00000000478	ENSSSCT00000000516, ENSSSCT00000033391, ENSSSCT00000062302, ENSSSCT00000064279, XM_021092898, XM_021092899, XM_021092900, XM_021092901, XM_021092902, XM_021092905, XM_021092906, XM_021092908, XM_021092909, XM_021092910, XM_021092911, XM_021092912, XM_021092913, XM_021092914, XM_021092916, XM_021092917, XM_021092918	5:30697047-31020436:-1	glutamate receptor interacting protein 1	Cluster001
GRM3	115	ENSSSCG00000015395	ENSSSCT00000016770, ENSSSCT00000023813, XM_021063473, XM_021063475	9:93731212-93973543:-1	glutamate metabotropic receptor 3	Cluster001
GRM5	128	ENSSSCG00000029865	ENSSSCT00000016281, ENSSSCT00000026894, ENSSSCT00000027396, ENSSSCT00000030374, ENSSSCT00000051738, XM_021102327, XM_021102328, XM_021102329, XM_021102330, XM_021102331, XM_021102332	9:21918736-22438208:-1	glutamate metabotropic receptor 5	Cluster001
GRM7	510	.	XM_021071050, XM_021071051, XM_021071052, XM_021071054, XM_021071055, XM_021071056, XM_021071057	.	glutamate metabotropic receptor 7	Cluster001
GSK3B	270	ENSSSCG00000011889	ENSSSCT00000013006, ENSSSCT00000036443, ENSSSCT00000039364, XM_021068185, XM_021068186, XM_021068187	13:140136158-140369575:+1	glycogen synthase kinase 3 beta	Cluster001
GSPT1	503	ENSSSCG00000021118	ENSSSCT00000031083, ENSSSCT00000064690, XM_021086589, XM_021086591	3:31237106-31273865:+1	G1 to S phase transition 1	Cluster001
GSPT2	15	ENSSSCG00000012317	ENSSSCT00000013468, ENSSSCT00000032845, XM_003135101, XM_013986143	X:45188882-45196852:-1	G1 to S phase transition 2	Cluster001
GSTA4	260	ENSSSCG00000002627	ENSSSCT00000002915, ENSSSCT00000039645, XM_005666463	7:46635904-46656452:-1	glutathione S-transferase alpha 4	Cluster001
GTF2A1	769	ENSSSCG00000002411	ENSSSCT00000002680, XM_021099583	7:103963245-104009302:-1	general transcription factor IIA subunit 1	Cluster001
GTF2F1	452	ENSSSCG00000013539	ENSSSCT00000014786, ENSSSCT00000052737, XM_003123111	2:72688008-72700964:+1	general transcription factor IIF subunit 1	Cluster001
GTF2F2	135	ENSSSCG00000034156	ENSSSCT00000048041, ENSSSCT00000056836	11:21983665-22145003:-1	general transcription factor IIF subunit 2	Cluster001
GTF2I	1	ENSSSCG00000007721	ENSSSCT00000008466, ENSSSCT00000030268, ENSSSCT00000031896, ENSSSCT00000052444, XM_005661990, XM_005661991, XM_005661992, XM_005661993, XM_005661994, XM_021086344	3:11656922-11811423:+1	general transcription factor IIi	Cluster001
GTF3A	49	ENSSSCG00000009305	ENSSSCT00000010193, ENSSSCT00000038770, ENSSSCT00000054723, XM_021066008	11:4849624-4869353:+1	general transcription factor IIIA	Cluster001
GTF3C3	94	ENSSSCG00000016070	ENSSSCT00000017496, XM_001925846, XM_013982275	15:100667319-100701708:-1	general transcription factor IIIC subunit 3	Cluster001
GTF3C5	50	.	XM_021070910, XM_021070913	.	general transcription factor IIIC subunit 5	Cluster001
GTF3C6	158	ENSSSCG00000004393	ENSSSCT00000004856, XM_003121346, XM_005652686	1:76896823-76909858:+1	general transcription factor IIIC subunit 6	Cluster001
GUF1	118	ENSSSCG00000008807	ENSSSCT00000009637, ENSSSCT00000048495, XM_003128951, XM_013978641, XM_021101163	8:35167843-35192684:+1	GUF1 homolog, GTPase	Cluster001
GUSB	2	ENSSSCG00000007739	ENSSSCT00000008484	3:16671577-16687672:+1	glucuronidase beta	Cluster001
H3F3A	121	ENSSSCG00000023971	ENSSSCT00000022867, ENSSSCT00000049322, ENSSSCT00000050448	10:13939843-13948506:+1	H3 histone, family 3A	Cluster001
HAS3	2	ENSSSCG00000035601	ENSSSCT00000064379, XM_021093586, XM_021093588, XM_021093589, XM_021093590	6:17844974-17856082:-1	hyaluronan synthase 3	Cluster001
HAUS3	171	.	XM_021100923, XM_021100924, XM_021100925	.	HAUS augmin like complex subunit 3	Cluster001
HBEGF	284	ENSSSCG00000014362	ENSSSCT00000015692, XM_021081491	2:142102458-142115196:-1	heparin binding EGF like growth factor	Cluster001
HCFC2	509	ENSSSCG00000000846	ENSSSCT00000000923, ENSSSCT00000051495, XM_003126644	5:80368244-80409786:-1	host cell factor C2	Cluster001
HDAC2	533	ENSSSCG00000004432	ENSSSCT00000004897, XM_001925318	1:79866670-79901587:-1	histone deacetylase 2	Cluster001
HDAC9	88	ENSSSCG00000015368	ENSSSCT00000005975, ENSSSCT00000016743, ENSSSCT00000033282, ENSSSCT00000033958, ENSSSCT00000042130, ENSSSCT00000065597, XM_021102459, XM_021102460, XM_021102461, XM_021102462, XM_021102463, XM_021102465, XM_021102466, XM_021102467, XM_021102468, XM_021102469, XM_021102470, XM_021102471, XM_021102472, XM_021102473, XM_021102474, XM_021102476, XM_021102477, XM_021102478, XM_021102479, XM_021102480,…	9:87449660-88186959:+1	histone deacetylase 9	Cluster001
HDGFL2	165	ENSSSCG00000013511	ENSSSCT00000014758, XM_003123078, XM_005661325, XM_005661326	2:74331909-74357040:-1	HDGF like 2	Cluster001
HDGFL3	818	ENSSSCG00000035432	ENSSSCT00000038154, ENSSSCT00000051162, XM_021098881, XM_021098882	7:51731034-51822353:+1	HDGF like 3	Cluster001
HDX	813	ENSSSCG00000038744	ENSSSCT00000038951, XM_021079848	X:67560934-67686614:-1	highly divergent homeobox	Cluster001
HELB	11	ENSSSCG00000000477	ENSSSCT00000000515, ENSSSCT00000052520, XM_003126364, XM_013997699	5:30645632-30696486:+1	DNA helicase B	Cluster001
HELZ	32	ENSSSCG00000017272	ENSSSCT00000018802, ENSSSCT00000041156, ENSSSCT00000051180, ENSSSCT00000051713, ENSSSCT00000056309, ENSSSCT00000064372, XM_021066743, XM_021066744, XM_021066745, XM_021066749, XM_021066752	12:13495008-13654937:-1	helicase with zinc finger	Cluster001
HERC1	231	ENSSSCG00000004561	ENSSSCT00000005038, ENSSSCT00000026841, ENSSSCT00000044262, XM_021093938, XM_021093944, XM_021093952, XM_021093961, XM_021093969, XM_021093976, XM_021093982, XM_021093989, XM_021094000, XM_021094008, XM_021094017, XM_021094025, XM_021094031, XM_021094038, XM_021094045, XM_021094055, XM_021094060, XM_021094069, XM_021094074, XM_021094078, XM_021094084	1:108205794-108403681:+1	HECT and RLD domain containing E3 ubiquitin protein ligase family member 1	Cluster001
HERPUD2	301	ENSSSCG00000027389	ENSSSCT00000024969, XM_021078631	18:38284520-38326392:+1	HERPUD family member 2	Cluster001
HFM1	610	ENSSSCG00000006912	ENSSSCT00000007570, ENSSSCT00000038753, ENSSSCT00000039999, XM_013997383, XM_013997386, XM_013997388, XM_021090251, XM_021090252, XM_021090253, XM_021090254, XM_021090255, XM_021090256, XM_021090257, XM_021090258, XM_021090259, XM_021090260	4:125522334-125606882:+1	HFM1, ATP dependent DNA helicase homolog	Cluster001
HIF1A	482	ENSSSCG00000005096	ENSSSCT00000005618, ENSSSCT00000046942, ENSSSCT00000051506, ENSSSCT00000058991	1:190625293-190678472:+1	hypoxia inducible factor 1 subunit alpha	Cluster001
HIGD1A	265	.	XM_003132140, XM_005669425, XM_021071713	.	HIG1 hypoxia inducible domain family member 1A	Cluster001
HIPK3	90	ENSSSCG00000013312	ENSSSCT00000014538, ENSSSCT00000037588, ENSSSCT00000052372, ENSSSCT00000054271, ENSSSCT00000057781, XM_003122898, XM_005661033, XM_005661035, XM_005661037, XM_021083201, XM_021083202, XM_021083204, XM_021083206	2:27580129-27686872:-1	homeodomain interacting protein kinase 3	Cluster001
HIVEP1	26	ENSSSCG00000001049	ENSSSCT00000001143, ENSSSCT00000048770, ENSSSCT00000056911, XM_005652627, XM_013987642, XM_013987643, XM_013987646, XM_013987649, XM_013987651	7:8519044-8661137:+1	human immunodeficiency virus type I enhancer binding protein 1	Cluster001
HIVEP2	523	ENSSSCG00000004138	ENSSSCT00000004573, ENSSSCT00000054067, ENSSSCT00000056296, XM_005659167, XM_021072375, XM_021072379, XM_021072385, XM_021072389, XM_021072392, XM_021072405, XM_021072410, XM_021072419, XM_021072421, XM_021072427, XM_021072434	1:22241307-22436439:+1	human immunodeficiency virus type I enhancer binding protein 2	Cluster001
HK1	434	ENSSSCG00000010253	ENSSSCT00000011223, ENSSSCT00000051037	14:72382912-72460924:+1	hexokinase 1	Cluster001
HLTF	139	ENSSSCG00000025293	ENSSSCT00000023239, ENSSSCT00000042341, ENSSSCT00000051853, ENSSSCT00000065702, XM_003358605, XM_013991989, XM_013992040	13:89258896-89333032:-1	helicase like transcription factor	Cluster001
HMGCR	545	ENSSSCG00000014080	ENSSSCT00000015381, ENSSSCT00000040907, ENSSSCT00000041297, ENSSSCT00000065332	2:84380212-84402956:+1	3-hydroxy-3-methylglutaryl-CoA reductase	Cluster001
HMGN3	89	ENSSSCG00000004470	ENSSSCT00000004938, ENSSSCT00000045120, ENSSSCT00000055660, ENSSSCT00000062552, XM_005659420, XM_005659421, XM_005659422, XM_005659423	1:86954328-86987461:+1	high mobility group nucleosomal binding domain 3	Cluster001
HMGXB4	85	ENSSSCG00000025780	ENSSSCT00000027184, ENSSSCT00000050316, ENSSSCT00000057495, ENSSSCT00000061932, XM_021081481, XM_021081482, XM_021081483, XM_021081484, XM_021081485	AEMK02000361.1:1819209-1847568:+1	HMG-box containing 4	Cluster001
HNRNPA1	69	ENSSSCG00000000288	ENSSSCT00000000309, ENSSSCT00000058552, XM_005663854, XM_005663855	5:19484613-19494938:+1	heterogeneous nuclear ribonucleoprotein A1	Cluster001
HNRNPC	307	.	XM_021098230, XM_021098231, XM_021098232, XM_021098233, XM_021098234, XM_021098235, XM_021098236, XM_021098237, XM_021098238, XM_021098239, XM_021098240, XM_021098241, XM_021098242, XM_021098243, XM_021098245, XM_021098246, XM_021098247, XM_021098248, XM_021098249, XM_021098250, XM_021098251, XM_021098252, XM_021098253, XM_021098254, XM_021098255, XM_021098256, XM_021098257, XM_021098258, XM_0210…	.	heterogeneous nuclear ribonucleoprotein C (C1/C2)	Cluster001
HNRNPDL	265	ENSSSCG00000037245	ENSSSCT00000039976, ENSSSCT00000059147, XM_021101874, XM_021101875, XM_021101876, XM_021101877, XM_021101878, XM_021101879	8:135802407-135813032:+1	heterogeneous nuclear ribonucleoprotein D like	Cluster001
HNRNPF	254	.	XM_001929054, XM_005670999, XM_005671000, XM_005671001, XM_013983263, XM_013983264, XM_021073892, XM_021073894, XM_021073895, XM_021073896, XM_021073897	.	heterogeneous nuclear ribonucleoprotein F	Cluster001
HNRNPH1	357	ENSSSCG00000014022	ENSSSCT00000015317, ENSSSCT00000031735, ENSSSCT00000045319, ENSSSCT00000056442, ENSSSCT00000057556, ENSSSCT00000063369, XM_003123643, XM_005654939, XM_005654940, XM_005654941, XM_013987521, XM_013987522, XM_013987523, XM_013987524, XM_021084326, XM_021084327, XM_021084328, XM_021084329, XM_021084331, XM_021084332	2:78961456-78974724:+1	heterogeneous nuclear ribonucleoprotein H1	Cluster001
HNRNPR	658	ENSSSCG00000023761	ENSSSCT00000026348, ENSSSCT00000044093, ENSSSCT00000045044, XM_021095510, XM_021095511, XM_021095512, XM_021095513, XM_021095514, XM_021095516	6:81196062-81239387:-1	heterogeneous nuclear ribonucleoprotein R	Cluster001
HNRNPUL1	260	.	XM_021094416	.	heterogeneous nuclear ribonucleoprotein U like 1	Cluster001
HP1BP3	594	ENSSSCG00000003511	ENSSSCT00000003901, ENSSSCT00000041568, ENSSSCT00000048275, ENSSSCT00000051287, ENSSSCT00000058814, XM_013999048, XM_021097631, XM_021097632, XM_021097633, XM_021097634, XM_021097635, XM_021097636, XM_021097637, XM_021097638	6:78975510-79007994:-1	heterochromatin protein 1 binding protein 3	Cluster001
HS6ST3	72	ENSSSCG00000009504	ENSSSCT00000010421, XM_021065373	11:66183787-66186846:+1	heparan sulfate 6-O-sulfotransferase 3	Cluster001
HSF2	456	ENSSSCG00000004238	ENSSSCT00000004683, ENSSSCT00000057546, XM_005659227, XM_005659228	1:40147164-40180297:-1	heat shock transcription factor 2	Cluster001
HSP90AB1	821	.	XM_005666063	.	heat shock protein 90 alpha family class B member 1	Cluster001
HSPA4	741	ENSSSCG00000014292	ENSSSCT00000015615, ENSSSCT00000028758, ENSSSCT00000047672, XM_005661654	2:135305749-135394185:+1	heat shock protein family A (Hsp70) member 4	Cluster001
HTATSF1	325	ENSSSCG00000023062	ENSSSCT00000022638, ENSSSCT00000066054, XM_021079891	X:111624227-111642549:+1	HIV-1 Tat specific factor 1	Cluster001
HTRA1	3	.	XM_003133208	.	HtrA serine peptidase 1	Cluster001
IBTK	75	ENSSSCG00000004460	ENSSSCT00000004926, ENSSSCT00000044652, XM_001924870, XM_005659413, XM_013992804	1:83973536-84070798:+1	inhibitor of Bruton tyrosine kinase	Cluster001
ICE2	94	ENSSSCG00000004577	ENSSSCT00000005056, ENSSSCT00000025364, ENSSSCT00000047039, XM_001925575, XM_013992913, XM_021094409, XM_021094415, XM_021094419, XM_021094424, XM_021094430, XM_021094439, XM_021094453	1:111489168-111561911:+1	interactor of little elongation complex ELL subunit 2	Cluster001
ICK	156	ENSSSCG00000002628	ENSSSCT00000002916, XM_021098828	7:46662258-46701044:-1	intestinal cell kinase	Cluster001
IER5L	109	ENSSSCG00000005673	ENSSSCT00000006236	1:269454099-269455310:-1	immediate early response 5 like	Cluster001
IFNAR1	465	ENSSSCG00000033115	ENSSSCT00000049492, XM_021068507	13:196925707-196950532:+1	interferon alpha and beta receptor subunit 1	Cluster001
IFRD1	132	ENSSSCG00000016646	ENSSSCT00000018124, ENSSSCT00000037209, XM_005673237, XM_013985699	18:33198006-33221001:-1	interferon related developmental regulator 1	Cluster001
IFT74	303	ENSSSCG00000005124	ENSSSCT00000005649, ENSSSCT00000043156, ENSSSCT00000046425, XM_005654488	1:196086063-196173930:-1	intraflagellar transport 74	Cluster001
IFT81	297	ENSSSCG00000009818	ENSSSCT00000010761, XM_021073040, XM_021073041, XM_021073042, XM_021073043, XM_021073044, XM_021073045	14:31425661-31615000:+1	intraflagellar transport 81	Cluster001
IFT88	117	ENSSSCG00000009270	ENSSSCT00000010151, ENSSSCT00000031907, ENSSSCT00000046146, ENSSSCT00000053096, ENSSSCT00000055597	11:943456-1025613:+1	intraflagellar transport 88	Cluster001
IGBP1	180	.	XM_001927370	.	immunoglobulin binding protein 1	Cluster001
IGSF21	294	ENSSSCG00000020992	ENSSSCT00000023048, XM_021095457	6:76687473-76948453:+1	immunoglobin superfamily member 21	Cluster001
IGSF3	316	ENSSSCG00000006737	ENSSSCT00000007380, XM_021089981	4:104117243-104164244:+1	immunoglobulin superfamily member 3	Cluster001
IL17RD	63	ENSSSCG00000011463	ENSSSCT00000012544, XM_021068996	13:38939402-39006690:-1	interleukin 17 receptor D	Cluster001
ILDR2	14	ENSSSCG00000035124	ENSSSCT00000006924, ENSSSCT00000029897, ENSSSCT00000048183, ENSSSCT00000056022, ENSSSCT00000061149, ENSSSCT00000062149, XM_021089477, XM_021089478, XM_021089479, XM_021089480, XM_021089483, XM_021089484	4:84056730-84117122:+1	immunoglobulin like domain containing receptor 2	Cluster001
IMPACT	59	ENSSSCG00000003713	ENSSSCT00000004113, ENSSSCT00000044081, XM_005665327	6:109235381-109272792:+1	impact RWD domain protein	Cluster001
IMPDH2	137	ENSSSCG00000011372	ENSSSCT00000012450, ENSSSCT00000065477, XM_003132201, XM_005669533	13:31655809-31663560:-1	inosine monophosphate dehydrogenase 2	Cluster001
ING2	748	ENSSSCG00000024555	ENSSSCT00000025252, XM_003133342	15:44917598-44925904:+1	inhibitor of growth family member 2	Cluster001
INO80D	49	ENSSSCG00000016125	ENSSSCT00000017556, ENSSSCT00000040875, ENSSSCT00000050436, XM_021076043, XM_021076044, XM_021076045, XM_021076046, XM_021076047	15:109311323-109376614:-1	INO80 complex subunit D	Cluster001
INPP4A	165	ENSSSCG00000008190	ENSSSCT00000008969, XM_021085602	3:55713532-55760365:-1	inositol polyphosphate-4-phosphatase type I A	Cluster001
INSR	39	ENSSSCG00000013566	ENSSSCT00000014815, ENSSSCT00000014817, XM_021083940, XM_021083941, XM_021083943	2:71797125-71936215:+1	insulin receptor	Cluster001
INTS14	249	ENSSSCG00000004936	ENSSSCT00000005447, ENSSSCT00000030635, ENSSSCT00000042425, ENSSSCT00000053541, ENSSSCT00000057006, XM_005659854, XM_021100221	1:163567749-163603842:-1	integrator complex subunit 14	Cluster001
INTS7	105	ENSSSCG00000015602	ENSSSCT00000016994, ENSSSCT00000016995, ENSSSCT00000039522, ENSSSCT00000039891, ENSSSCT00000050213, XM_021063859, XM_021063860	9:131275508-131361766:+1	integrator complex subunit 7	Cluster001
INTS8	109	ENSSSCG00000006096	ENSSSCT00000006687, ENSSSCT00000059483, XM_003125559	4:41821848-41878690:-1	integrator complex subunit 8	Cluster001
IP6K2	343	ENSSSCG00000040922	ENSSSCT00000063383, XM_003132192, XM_021070643	13:31377819-31406900:-1	inositol hexakisphosphate kinase 2	Cluster001
IPMK	47	ENSSSCG00000040863	ENSSSCT00000049506, ENSSSCT00000059058, XM_021073221, XM_021073222	14:92383508-92428742:+1	inositol polyphosphate multikinase	Cluster001
IPO5	229	ENSSSCG00000009509	ENSSSCT00000010426	11:67004363-67060550:+1	importin 5	Cluster001
IPO7	716	ENSSSCG00000028886	ENSSSCT00000025295, ENSSSCT00000037398, ENSSSCT00000037895, ENSSSCT00000040802, ENSSSCT00000043219, ENSSSCT00000045714, ENSSSCT00000046285, XM_013979065, XM_021062248	9:111107-163583:-1	importin 7	Cluster001
IRS1	1	ENSSSCG00000025729	ENSSSCT00000023756, XM_021074601	15:128245383-128308352:-1	insulin receptor substrate 1	Cluster001
ISLR2	214	ENSSSCG00000036011	ENSSSCT00000054779, XM_005666160, XM_005666161, XM_005666162, XM_005666164, XM_013978091, XM_013978093, XM_013978094	7:59386241-59393207:-1	immunoglobulin superfamily containing leucine rich repeat 2	Cluster001
ITPK1	84	ENSSSCG00000002457	ENSSSCT00000002728, ENSSSCT00000036699, ENSSSCT00000063080, XM_021097985	7:114361968-114520179:-1	inositol-tetrakisphosphate 1-kinase	Cluster001
ITSN1	446	ENSSSCG00000024614	ENSSSCT00000027819, ENSSSCT00000040338, XM_021070946	13:197248981-197481159:+1	intersectin 1	Cluster001
IVNS1ABP	416	ENSSSCG00000015570	ENSSSCT00000016961, ENSSSCT00000043629, ENSSSCT00000059738, ENSSSCT00000061489, XM_021101984	9:126449261-126480546:-1	influenza virus NS1A binding protein	Cluster001
IWS1	182	ENSSSCG00000035410	ENSSSCT00000057384, ENSSSCT00000062577, XM_021076422, XM_021076423, XM_021076424, XM_021076425, XM_021076426, XM_021076427, XM_021076430	15:59822779-59875906:+1	IWS1, SUPT6H interacting protein	Cluster001
JADE1	270	ENSSSCG00000009071	ENSSSCT00000009936, ENSSSCT00000040448, ENSSSCT00000046999, ENSSSCT00000047648, ENSSSCT00000063392, ENSSSCT00000065075, XM_003129196, XM_005656538, XM_005656539, XM_005656540, XM_013989331, XM_021100680, XM_021100681, XM_021100683, XM_021100684, XM_021100685, XM_021100687, XM_021100688, XM_021100689, XM_021100691	8:96208985-96271257:-1	jade family PHD finger 1	Cluster001
JADE3	120	ENSSSCG00000012267	ENSSSCT00000013414, ENSSSCT00000033102, ENSSSCT00000050945, ENSSSCT00000058005, XM_005673581, XM_005673582, XM_013986083, XM_013986084, XM_013986085, XM_013986086, XM_013986087, XM_013986088, XM_013986089, XM_013986090, XM_021080377, XM_021080378, XM_021080379, XM_021080380, XM_021080381, XM_021080382, XM_021080383	X:41579709-41714702:+1	jade family PHD finger 3	Cluster001
JAKMIP1	193	ENSSSCG00000008710	ENSSSCT00000009529, ENSSSCT00000040033, ENSSSCT00000040828, ENSSSCT00000058612, XM_013978520, XM_021100976, XM_021100977, XM_021100978, XM_021100979, XM_021100981, XM_021100982	8:4472582-4616258:+1	janus kinase and microtubule interacting protein 1	Cluster001
JAKMIP2	450	ENSSSCG00000014420	ENSSSCT00000015760, ENSSSCT00000028347, ENSSSCT00000041918, ENSSSCT00000046187, ENSSSCT00000049197, ENSSSCT00000050769, ENSSSCT00000053816, ENSSSCT00000064656, ENSSSCT00000065010, ENSSSCT00000065300, XM_021084964	2:148859418-149045932:-1	janus kinase and microtubule interacting protein 2	Cluster001
JAZF1	268	ENSSSCG00000016691	ENSSSCT00000018172, ENSSSCT00000057513	18:44487997-44827657:+1	JAZF zinc finger 1	Cluster001
JMJD1C	785	ENSSSCG00000010226	ENSSSCT00000011192, ENSSSCT00000051269, ENSSSCT00000053707, ENSSSCT00000063041, ENSSSCT00000065498, XM_005671027, XM_005671029, XM_005671030, XM_005671032, XM_005671035, XM_021073640, XM_021073641, XM_021073642, XM_021073643, XM_021073644, XM_021073645, XM_021073648, XM_021073649, XM_021073650, XM_021073651, XM_021073652, XM_021073654, XM_021073655, XM_021073656, XM_021073657, XM_021073659, XM_02…	14:66640849-66967077:-1	jumonji domain containing 1C	Cluster001
KANSL2	154	ENSSSCG00000000842	ENSSSCT00000000916, ENSSSCT00000042946, ENSSSCT00000061249, XM_005664181, XM_005664182, XM_013997992, XM_021091034	5:79281586-79315011:-1	KAT8 regulatory NSL complex subunit 2	Cluster001
KARS	232	ENSSSCG00000002704	ENSSSCT00000002998, ENSSSCT00000038985, ENSSSCT00000041141, ENSSSCT00000061127, XM_003126856	6:12056567-12077051:+1	lysyl-tRNA synthetase	Cluster001
KAT6A	285	ENSSSCG00000007023	ENSSSCT00000007692, ENSSSCT00000037029, XM_021078038	17:11005533-11107079:-1	lysine acetyltransferase 6A	Cluster001
KAT6B	555	ENSSSCG00000010316	ENSSSCT00000011293, ENSSSCT00000040190, ENSSSCT00000043884, ENSSSCT00000056205, ENSSSCT00000063691, XM_005671117, XM_005671118, XM_013983356, XM_021072865, XM_021072866, XM_021072867, XM_021072868, XM_021072870	14:77404443-77597673:+1	lysine acetyltransferase 6B	Cluster001
KATNA1	245	ENSSSCG00000004104	ENSSSCT00000004539, ENSSSCT00000023948, XM_021086876, XM_021086880	1:16330847-16360800:+1	katanin catalytic subunit A1	Cluster001
KATNB1	163	ENSSSCG00000002813	ENSSSCT00000003113, ENSSSCT00000045452, ENSSSCT00000064806, XM_021093933, XM_021093934, XM_021093935, XM_021093936, XM_021093937, XM_021093939, XM_021093940	6:19630350-19661010:+1	katanin regulatory subunit B1	Cluster001
KBTBD2	28	ENSSSCG00000022464	ENSSSCT00000026958, ENSSSCT00000041863, XM_013985724, XM_021079001	18:40604558-40637085:+1	kelch repeat and BTB domain containing 2	Cluster001
KBTBD8	77	ENSSSCG00000011500	ENSSSCT00000012585, ENSSSCT00000060608	13:48486955-48499987:+1	kelch repeat and BTB domain containing 8	Cluster001
KCMF1	137	ENSSSCG00000008242	ENSSSCT00000009026, XM_021087303	3:59623022-59654141:-1	potassium channel modulatory factor 1	Cluster001
KCNK10	215	ENSSSCG00000002423	ENSSSCT00000002692, ENSSSCT00000049892, ENSSSCT00000063859, ENSSSCT00000065405	7:110121263-110271481:-1	potassium two pore domain channel subfamily K member 10	Cluster001
KCNN1	512	ENSSSCG00000013892	ENSSSCT00000015178, ENSSSCT00000057624, XM_003123502, XM_005654898, XM_005654899, XM_005654900, XM_005654901, XM_005654902, XM_005654903	2:59779790-59814815:-1	potassium calcium-activated channel subfamily N member 1	Cluster001
KCTD12	398	ENSSSCG00000009468	ENSSSCT00000010381, XM_021065731	11:48946452-49031093:-1	potassium channel tetramerization domain containing 12	Cluster001
KCTD3	411	ENSSSCG00000010811	ENSSSCT00000011827, ENSSSCT00000027421, XM_005667916	10:5754175-5815095:+1	potassium channel tetramerization domain containing 3	Cluster001
KDELR2	28	ENSSSCG00000031432	ENSSSCT00000062901, XM_021086076	3:4716646-4735301:+1	KDEL endoplasmic reticulum protein retention receptor 2	Cluster001
KDM1B	9	ENSSSCG00000001074	ENSSSCT00000001169, ENSSSCT00000036868, ENSSSCT00000038941, ENSSSCT00000052124, ENSSSCT00000065825, XM_001927844, XM_013977460	7:13845942-13901253:+1	lysine demethylase 1B	Cluster001
KDM2B	313	ENSSSCG00000029803	ENSSSCT00000010754, ENSSSCT00000010755, ENSSSCT00000025160, ENSSSCT00000029722, ENSSSCT00000030626, XM_021073420, XM_021073421, XM_021073422, XM_021073423, XM_021073424, XM_021073425, XM_021073426, XM_021073427, XM_021073428, XM_021073429, XM_021073430, XM_021073431, XM_021073433	14:31057005-31203505:+1	lysine demethylase 2B	Cluster001
KDM3B	69	ENSSSCG00000014331	ENSSSCT00000015658, ENSSSCT00000041556, XM_003480917	2:140346223-140417203:+1	lysine demethylase 3B	Cluster001
KDM4B	139	ENSSSCG00000024570	ENSSSCT00000025153, ENSSSCT00000026522, ENSSSCT00000029703, ENSSSCT00000041912, ENSSSCT00000047149, ENSSSCT00000060520, XM_021084029, XM_021084030, XM_021084031, XM_021084033, XM_021084034, XM_021084035, XM_021084036, XM_021084037	2:73746494-73889865:-1	lysine demethylase 4B	Cluster001
KERA	4	ENSSSCG00000000917	ENSSSCT00000001001, ENSSSCT00000037414, XM_001927128	5:91796324-91801357:+1	keratocan	Cluster001
KHDRBS1	343	ENSSSCG00000023122	ENSSSCT00000028289, ENSSSCT00000031351, ENSSSCT00000045076	6:88530374-88572463:+1	KH RNA binding domain containing, signal transduction associated 1	Cluster001
KHDRBS3	162	ENSSSCG00000005941	ENSSSCT00000006524, ENSSSCT00000035168, XM_021088871	4:6282076-6446773:-1	KH RNA binding domain containing, signal transduction associated 3	Cluster001
KIAA0319	29	ENSSSCG00000001091	ENSSSCT00000001187, XM_005665630	7:19386111-19451666:-1	KIAA0319 ortholog	Cluster001
KIAA0408	458	ENSSSCG00000004215	ENSSSCT00000048885, XM_013988435, XM_021088481	1:35756782-35778966:+1	KIAA0408 ortholog	Cluster001
KIAA0586	311	ENSSSCG00000005076	ENSSSCT00000005594, ENSSSCT00000023827, ENSSSCT00000026022, ENSSSCT00000046539, ENSSSCT00000051083, ENSSSCT00000063997, ENSSSCT00000064069, XM_021102647	1:187475007-187725226:+1	KIAA0586 ortholog	Cluster001
KIAA0753	113	ENSSSCG00000017890	ENSSSCT00000019467, ENSSSCT00000038443, ENSSSCT00000040070, ENSSSCT00000040139, XM_005669141, XM_005669142, XM_021067711	12:50729841-50804932:+1	KIAA0753 ortholog	Cluster001
KIAA0895	424	ENSSSCG00000016659	ENSSSCT00000018137, ENSSSCT00000047991, ENSSSCT00000048919, XM_021079072, XM_021079074, XM_021079075, XM_021079076, XM_021079077, XM_021079079, XM_021079080, XM_021079081, XM_021079082	18:37724469-37793150:+1	KIAA0895 ortholog	Cluster001
KIAA0895L	140	ENSSSCG00000032443	ENSSSCT00000043405, ENSSSCT00000045343, XM_021094032, XM_021094033, XM_021094034, XM_021094036	6:27818259-27829297:-1	KIAA0895 like	Cluster001
KIAA0907	400	.	XM_001928648	.	KIAA0907 ortholog	Cluster001
KIAA1109	262	ENSSSCG00000009090	ENSSSCT00000009956, ENSSSCT00000038122, ENSSSCT00000039509, ENSSSCT00000045526, ENSSSCT00000057093, ENSSSCT00000061877, ENSSSCT00000065880, XM_021101618, XM_021101619, XM_021101620, XM_021101623, XM_021101624, XM_021101625, XM_021101626, XM_021101627, XM_021101629, XM_021101630, XM_021101631, XM_021101633, XM_021101634, XM_021101635	8:101737599-101937111:-1	KIAA1109 ortholog	Cluster001
KIAA1211	157	ENSSSCG00000008903	ENSSSCT00000009747, ENSSSCT00000045089, ENSSSCT00000045412, ENSSSCT00000046720, ENSSSCT00000049769, ENSSSCT00000052252, ENSSSCT00000053953, ENSSSCT00000054813, ENSSSCT00000061833, XM_021101354, XM_021101355, XM_021101356, XM_021101357, XM_021101359, XM_021101360, XM_021101361, XM_021101362	8:55336005-55598257:+1	KIAA1211 ortholog	Cluster001
KIAA1328	90	ENSSSCG00000003747	ENSSSCT00000004149, ENSSSCT00000048090, ENSSSCT00000054817, XM_021096286, XM_021096287, XM_021096289, XM_021096290, XM_021096291	6:120794841-121036285:+1	KIAA1328 ortholog	Cluster001
KIAA1429	319	.	XM_021089096, XM_021089097, XM_021089098, XM_021089099, XM_021089100	.	KIAA1429 ortholog	Cluster001
KIAA1456	2	.	XM_005672630, XM_013984951, XM_013984952, XM_013984956, XM_013984960, XM_013984961, XM_013984962, XM_013984963, XM_021077474, XM_021077475, XM_021077476, XM_021077477, XM_021077478, XM_021077479, XM_021077480, XM_021077481, XM_021077482, XM_021077483, XM_021077484, XM_021077485, XM_021077486	.	KIAA1456 ortholog	Cluster001
KIAA1468	25	.	XM_003121702, XM_005654481, XM_005654482, XM_021099712, XM_021099721, XM_021099741, XM_021099750	.	KIAA1468 ortholog	Cluster001
KIAA1549	606	ENSSSCG00000016513	ENSSSCT00000017980, XM_021078582	18:10677030-10829362:+1	KIAA1549 ortholog	Cluster001
KIAA1841	124	ENSSSCG00000008386	ENSSSCT00000009183, ENSSSCT00000042064, ENSSSCT00000047963, ENSSSCT00000056203, XM_021087506, XM_021087508, XM_021087509, XM_021087510, XM_021087512, XM_021087513, XM_021087514, XM_021087515, XM_021087516, XM_021087517	3:80674990-80746281:-1	KIAA1841 ortholog	Cluster001
KIAA2022	112	.	XM_003484131	.	KIAA2022 ortholog	Cluster001
KIDINS220	761	ENSSSCG00000008644	ENSSSCT00000009457, ENSSSCT00000040887, ENSSSCT00000046005, ENSSSCT00000049189, ENSSSCT00000055953, ENSSSCT00000061190, ENSSSCT00000065195, ENSSSCT00000065265, XM_021087877, XM_021087878, XM_021087879, XM_021087880, XM_021087881, XM_021087882, XM_021087883, XM_021087884, XM_021087885, XM_021087886, XM_021087887, XM_021087888, XM_021087890, XM_021087891, XM_021087892, XM_021087893, XM_021087894, X…	3:127382543-127475973:+1	kinase D interacting substrate 220	Cluster001
KIF13A	284	ENSSSCG00000020858	ENSSSCT00000001166, ENSSSCT00000023576, ENSSSCT00000023668, ENSSSCT00000029683, ENSSSCT00000029912, ENSSSCT00000052972, XM_021100216, XM_021100217, XM_021100218, XM_021100219, XM_021100220, XM_021100223, XM_021100224, XM_021100225, XM_021100226, XM_021100227, XM_021100228, XM_021100229, XM_021100230, XM_021100231	7:13498222-13717603:-1	kinesin family member 13A	Cluster001
KIF2A	755	ENSSSCG00000030186	ENSSSCT00000032036, ENSSSCT00000044578, ENSSSCT00000045693, ENSSSCT00000046317, ENSSSCT00000047719, ENSSSCT00000050979, ENSSSCT00000056867, XM_021076561, XM_021076562, XM_021076563, XM_021076564	16:40971713-41102545:+1	kinesin family member 2A	Cluster001
KIF3A	219	ENSSSCG00000014283	ENSSSCT00000015606, ENSSSCT00000061049, XM_003123936, XM_003354275, XM_003354276, XM_005661644, XM_013995118, XM_013995119, XM_021085422	2:134928217-135069395:-1	kinesin family member 3A	Cluster001
KIF5B	465	ENSSSCG00000011027	ENSSSCT00000012069, ENSSSCT00000043634, ENSSSCT00000059788, XM_021064805	10:42595285-42693526:-1	kinesin family member 5B	Cluster001
KIT	685	ENSSSCG00000008842	ENSSSCT00000009679, ENSSSCT00000062378	8:41402322-41492977:+1	KIT proto-oncogene receptor tyrosine kinase	Cluster001
KLC1	632	.	XM_005653536, XM_005653537, XM_005653538, XM_021081533, XM_021081534, XM_021081535, XM_021081536, XM_021081537, XM_021081538	.	kinesin light chain 1	Cluster001
KLF7	684	ENSSSCG00000029998	ENSSSCT00000031970, ENSSSCT00000064987, XM_021074495, XM_021074496, XM_021074497	15:110286490-110379145:-1	Kruppel like factor 7	Cluster001
KLF8	666	ENSSSCG00000012352	ENSSSCT00000013507, ENSSSCT00000013509, XM_021079400, XM_021079401, XM_021079402, XM_021079403, XM_021079404	X:48663361-48747827:+1	Kruppel like factor 8	Cluster001
KLHL14	5	ENSSSCG00000003733	ENSSSCT00000004133, ENSSSCT00000049098	6:116510851-116612986:-1	kelch like family member 14	Cluster001
KLHL18	105	ENSSSCG00000024513	ENSSSCT00000027575, ENSSSCT00000057792, ENSSSCT00000066220, XM_021068721, XM_021068722, XM_021068723	13:30062836-30141511:+1	kelch like family member 18	Cluster001
KLHL23	662	ENSSSCG00000015937	ENSSSCT00000017353, ENSSSCT00000042574, ENSSSCT00000062516, XM_021076500, XM_021076501	15:76029282-76051762:+1	kelch like family member 23	Cluster001
KLHL25	102	ENSSSCG00000002258	ENSSSCT00000002515, XM_005666300	7:88262924-88264691:-1	kelch like family member 25	Cluster001
KLHL36	169	ENSSSCG00000038285	ENSSSCT00000055545	6:4067395-4077081:-1	kelch like family member 36	Cluster001
KLHL5	652	ENSSSCG00000008787	ENSSSCT00000009613, ENSSSCT00000056569, ENSSSCT00000057887, XM_021101108	8:30361386-30440991:+1	kelch like family member 5	Cluster001
KLHL8	354	ENSSSCG00000009226	ENSSSCT00000010105, ENSSSCT00000057387, XM_021101776, XM_021101777, XM_021101778, XM_021101779	8:131634191-131701255:+1	kelch like family member 8	Cluster001
KLHL9	303	ENSSSCG00000005150	ENSSSCT00000005678	1:201589416-201591302:-1	kelch like family member 9	Cluster001
KMT2C	48	ENSSSCG00000020663	ENSSSCT00000025866, ENSSSCT00000026487, ENSSSCT00000043226, ENSSSCT00000043259, ENSSSCT00000044152, ENSSSCT00000050452, ENSSSCT00000051463, ENSSSCT00000053377, XM_021079121, XM_021079122, XM_021079123, XM_021079124, XM_021079125, XM_021079126, XM_021079127, XM_021079128, XM_021079130, XM_021079131, XM_021079132, XM_021079133, XM_021079134, XM_021079135, XM_021079136, XM_021079137, XM_021079138, X…	18:4993204-5277722:+1	lysine methyltransferase 2C	Cluster001
KMT2E	652	ENSSSCG00000029082	ENSSSCT00000022506, ENSSSCT00000038016, ENSSSCT00000038314, ENSSSCT00000043656, ENSSSCT00000052703, ENSSSCT00000053473, ENSSSCT00000058146, ENSSSCT00000059260, XM_013979824, XM_021102566, XM_021102567, XM_021102568, XM_021102569, XM_021102570, XM_021102571, XM_021102573, XM_021102574, XM_021102576	9:104911799-105041742:+1	lysine methyltransferase 2E	Cluster001
KMT5B	652	ENSSSCG00000031459	ENSSSCT00000024630, ENSSSCT00000038627, ENSSSCT00000051185, ENSSSCT00000056668, XM_003122431, XM_021082725, XM_021082726, XM_021082728, XM_021082729, XM_021082730, XM_021082731, XM_021082732	2:4711090-4767688:+1	lysine methyltransferase 5B	Cluster001
KNOP1	152	.	XM_021086529, XM_021086530	.	lysine rich nucleolar protein 1	Cluster001
KPNA3	431	ENSSSCG00000024125	ENSSSCT00000030501, XM_021065149, XM_021065152	11:17947741-18034751:+1	karyopherin subunit alpha 3	Cluster001
KPNA4	562	ENSSSCG00000031077	ENSSSCT00000046911, XM_021069735, XM_021069736	13:100185025-100253051:-1	karyopherin subunit alpha 4	Cluster001
KPNB1	67	ENSSSCG00000017514	ENSSSCT00000019068, XM_003131528	12:23915911-23946076:+1	karyopherin subunit beta 1	Cluster001
KRAS	448	ENSSSCG00000026969	ENSSSCT00000025989, ENSSSCT00000042185, XM_003126427, XM_005653151, XM_005653152, XM_013993780, XM_013993793	5:48508774-48549358:+1	KRAS proto-oncogene, GTPase	Cluster001
KRIT1	34	.	XM_021102370, XM_021102371, XM_021102372, XM_021102373, XM_021102374, XM_021102375, XM_021102376, XM_021102377	.	KRIT1, ankyrin repeat containing	Cluster001
KTI12	27	.	XM_021096660	.	KTI12 chromatin associated homolog	Cluster001
KTN1	315	ENSSSCG00000005060	ENSSSCT00000005577, ENSSSCT00000043033, ENSSSCT00000045650, ENSSSCT00000049631, ENSSSCT00000052096, ENSSSCT00000054544, ENSSSCT00000060703, XM_021085505, XM_021085523, XM_021085571, XM_021085663, XM_021085690, XM_021085751, XM_021085852, XM_021085894, XM_021085951, XM_021086020, XM_021086082, XM_021086137	1:184881550-184990938:+1	kinectin 1	Cluster001
L1CAM	304	ENSSSCG00000012787	ENSSSCT00000034202, XM_003135494	X:124596653-124609457:-1	L1 cell adhesion molecule	Cluster001
L3MBTL3	140	ENSSSCG00000004203	ENSSSCT00000004644, ENSSSCT00000054860, ENSSSCT00000058280, ENSSSCT00000061211, ENSSSCT00000065993, XM_003121201, XM_003121202, XM_005659197, XM_005659198, XM_021088384, XM_021088389, XM_021088393, XM_021088399, XM_021088401, XM_021088404, XM_021088410, XM_021088414	1:33195395-33319720:-1	l(3)mbt-like 3 (Drosophila)	Cluster001
LARP1B	303	.	XM_013978892, XM_013978893, XM_013978894, XM_013978895, XM_013978898, XM_013978900, XM_013978901, XM_013978902, XM_013978903, XM_021101597, XM_021101598, XM_021101599, XM_021101600, XM_021101602, XM_021101603	.	La ribonucleoprotein domain family member 1B	Cluster001
LARS	225	ENSSSCG00000014411	ENSSSCT00000015750, ENSSSCT00000029042, XM_021084961	2:147480336-147547298:-1	leucyl-tRNA synthetase	Cluster001
LASP1	528	ENSSSCG00000040642	ENSSSCT00000039383, ENSSSCT00000047041, XM_021067060, XM_021067061	12:23222708-23267860:-1	LIM and SH3 protein 1	Cluster001
LATS1	336	ENSSSCG00000004106	ENSSSCT00000004541, ENSSSCT00000064835, XM_005659149	1:16274843-16321581:+1	large tumor suppressor kinase 1	Cluster001
LCMT1	655	.	XM_021086454, XM_021086455	.	leucine carboxyl methyltransferase 1	Cluster001
LCOR	86	ENSSSCG00000010513	ENSSSCT00000011501, ENSSSCT00000011503, ENSSSCT00000040853, ENSSSCT00000041184, ENSSSCT00000042373, ENSSSCT00000047065, ENSSSCT00000047494, ENSSSCT00000052455, ENSSSCT00000059038	14:108303948-108436982:+1	ligand-dependent corepressor	Cluster001
LDB2	170	ENSSSCG00000029227	ENSSSCT00000025105, ENSSSCT00000052683, ENSSSCT00000052909, XM_021101033, XM_021101034, XM_021101035, XM_021101036, XM_021101037, XM_021101038, XM_021101039, XM_021101040, XM_021101041, XM_021101042, XM_021101043, XM_021101044, XM_021101045, XM_021101046, XM_021101047, XM_021101049, XM_021101050, XM_021101051, XM_021101052, XM_021101053, XM_021101054, XM_021101056	8:11641064-12038210:-1	LIM domain binding 2	Cluster001
LDLRAD4	337	ENSSSCG00000027417	ENSSSCT00000032434, ENSSSCT00000038304, ENSSSCT00000038782, ENSSSCT00000044563, ENSSSCT00000044898, XM_013999207, XM_013999208, XM_013999212, XM_021096016, XM_021096017	6:96401652-96577621:-1	low density lipoprotein receptor class A domain containing 4	Cluster001
LEO1	252	ENSSSCG00000004625	ENSSSCT00000005108, ENSSSCT00000058640, XM_003121504, XM_021095347	1:119805071-119857348:+1	LEO1 homolog, Paf1/RNA polymerase II complex component	Cluster001
LGALSL	771	ENSSSCG00000030005	ENSSSCT00000030136, XM_013996105	3:77472166-77479365:-1	galectin like	Cluster001
LHX6	619	ENSSSCG00000005530	ENSSSCT00000006081, XM_021068367, XM_021068384, XM_021068392	1:262299687-262321074:-1	LIM homeobox 6	Cluster001
LIN54	760	ENSSSCG00000009242	ENSSSCT00000010122, ENSSSCT00000029534, ENSSSCT00000040449, ENSSSCT00000050831, ENSSSCT00000055002, XM_013989440, XM_013989441, XM_021101860, XM_021101862, XM_021101864, XM_021101865, XM_021101867, XM_021101868, XM_021101870, XM_021101871	8:135330918-135398263:+1	lin-54 DREAM MuvB core complex component	Cluster001
LIN7C	435	ENSSSCG00000022806	ENSSSCT00000022243, ENSSSCT00000060576, XM_003122904	2:32734691-32855734:+1	lin-7 homolog C, crumbs cell polarity complex component	Cluster001
LINGO2	286	ENSSSCG00000033151	ENSSSCT00000051065	10:38026962-38028782:+1	leucine rich repeat and Ig domain containing 2	Cluster001
LINS1	27	ENSSSCG00000004820	ENSSSCT00000005322, ENSSSCT00000028739, XM_013993232, XM_021098479, XM_021098482, XM_021098492, XM_021098501, XM_021098505, XM_021098509, XM_021098513, XM_021098523	1:139168783-139191174:-1	lines homolog 1	Cluster001
LMBRD2	253	ENSSSCG00000016834	ENSSSCT00000018329, ENSSSCT00000037666, ENSSSCT00000043890, ENSSSCT00000048047, XM_005657606, XM_013990625, XM_013990626, XM_013990628, XM_021076987, XM_021076988, XM_021076990, XM_021076991, XM_021076992	16:21405545-21463031:-1	LMBR1 domain containing 2	Cluster001
LMO7	421	ENSSSCG00000040184	ENSSSCT00000023080, ENSSSCT00000039818, ENSSSCT00000041124, ENSSSCT00000045739, ENSSSCT00000048570, ENSSSCT00000053917, ENSSSCT00000054934, ENSSSCT00000061055, ENSSSCT00000062043, ENSSSCT00000065846, XM_021065678, XM_021065679, XM_021065680, XM_021065681, XM_021065682, XM_021065683, XM_021065684, XM_021065685, XM_021065686, XM_021065687, XM_021065689, XM_021065690, XM_021065691, XM_021065692, XM_…	11:47911059-48133448:+1	LIM domain 7	Cluster001
LMOD3	200	ENSSSCG00000011508	ENSSSCT00000012594, ENSSSCT00000063514, XM_013981880	13:50540645-50554696:-1	leiomodin 3	Cluster001
LNPK	76	ENSSSCG00000015976	ENSSSCT00000017395, ENSSSCT00000025624, ENSSSCT00000044418, ENSSSCT00000052609, ENSSSCT00000055319, ENSSSCT00000064172, XM_005671972, XM_021074605	15:81721626-81806168:-1	lunapark, ER junction formation factor	Cluster001
LOC100127131	121	.	XM_003355375, XM_013988248, XM_021091599	.	tubulin alpha-1C chain	Cluster001
LOC100152690	3	.	XM_005670874	.	zinc finger protein 280B	Cluster001
LOC100154415	616	.	XM_001927940, XM_005670500, XM_013982726, XM_013982727, XM_013982728, XM_013982729, XM_013982730, XM_021072878, XM_021072880, XM_021072881, XM_021072882, XM_021072883, XM_021072884	.	zinc finger protein 268	Cluster001
LOC100157002	104	.	XM_003484218	.	vesicle-trafficking protein SEC22b	Cluster001
LOC100511376	43	.	XM_005662337, XM_013995880, XM_013995882, XM_013995883, XM_021087106	.	E3 SUMO-protein ligase RanBP2	Cluster001
LOC100513362	21	.	XM_005664913, XM_005664914	.	zinc finger protein 211-like	Cluster001
LOC100514323	406	.	XM_021069727	.	NACHT, LRR and PYD domains-containing protein 1a-like	Cluster001
LOC100514656	471	.	XM_013998879, XM_021095150, XM_021095151, XM_021095152, XM_021095153	.	zinc finger protein 501	Cluster001
LOC100515643	300	.	XM_021067479	.	dnaJ homolog subfamily C member 25	Cluster001
LOC100516606	345	.	XM_003125203, XM_005662586, XM_021087578, XM_021087579, XM_021087580	.	cytochrome c oxidase subunit 7A-related protein, mitochondrial	Cluster001
LOC100519853	175	.	XM_013978713, XM_021101313, XM_021101314, XM_021101315	.	zinc finger protein 525-like	Cluster001
LOC100523897	99	.	XM_021087072, XM_021087073, XM_021087074, XM_021087075	.	zinc finger protein 501-like	Cluster001
LOC100621287	680	.	XM_003356844, XM_005656487	.	MORF4 family-associated protein 1	Cluster001
LOC100621480	96	.	XM_003360392, XM_013990965, XM_021079922	.	transcription elongation factor A protein-like 3	Cluster001
LOC100621701	19	.	XM_021084894, XM_021084895, XM_021084896, XM_021084897, XM_021084898	.	protocadherin alpha-C2	Cluster001
LOC100624109	32	.	XM_013990859, XM_021080990, XM_021080991, XM_021080992	.	neuroligin-4, X-linked	Cluster001
LOC100624785	623	.	XM_021100120	.	tubulin beta-2A chain	Cluster001
LOC100624806	233	.	XM_021083883, XM_021083884	.	zinc finger protein 709	Cluster001
LOC100626752	324	.	XM_003355829, XM_021094241	.	UPF0547 protein C16orf87 homolog	Cluster001
LOC100737142	600	.	XM_021095142, XM_021095143	.	zinc finger protein 154	Cluster001
LOC100737316	70	.	XM_021084914	.	protocadherin beta-11-like	Cluster001
LOC100737768	172	.	XM_021086967	.	hemoglobin subunit alpha-like	Cluster001
LOC100737823	205	.	XM_005652812, XM_013990220	.	zinc finger protein 709-like	Cluster001
LOC100738050	7	.	XM_005671004, XM_021072348, XM_021072349, XM_021072350, XM_021072351, XM_021072352, XM_021072353, XM_021072354, XM_021072355, XM_021072356, XM_021072357, XM_021072358, XM_021072359, XM_021072360, XM_021072361, XM_021072362, XM_021072363, XM_021072364, XM_021072365, XM_021072366, XM_021072367, XM_021072368, XM_021072369, XM_021072370	.	zinc finger protein 33B	Cluster001
LOC100738087	471	.	XM_021076768	.	neuron-specific protein family member 2	Cluster001
LOC100738931	28	.	XM_021068865, XM_021068866	.	IQ domain-containing protein F5-like	Cluster001
LOC100739425	602	.	XM_013998456, XM_013998457, XM_013998458, XM_013998459, XM_013998461, XM_021097236, XM_021097237, XM_021097238, XM_021097239, XM_021097240, XM_021097241, XM_021097242	.	zinc finger protein 30 homolog	Cluster001
LOC100739498	353	.	XM_013995253	.	protocadherin beta-17-like	Cluster001
LOC102158443	602	.	XM_005664934, XM_013998895, XM_013998897, XM_013998898, XM_013998899	.	zinc finger protein 606	Cluster001
LOC102158906	1	.	XM_021097268	.	protein ZNF738-like	Cluster001
LOC102161787	35	.	XM_021092619	.	olfactory receptor 10AD1-like	Cluster001
LOC102167874	172	.	XM_021084615	.	translation initiation factor IF-2-like	Cluster001
LOC106504178	152	.	XM_013998888, XM_013998889	.	zinc finger protein 256-like	Cluster001
LOC106510532	53	.	XM_013998463	.	zinc finger protein 345	Cluster001
LOC110256637	77	.	XM_021072665, XM_021072666, XM_021072667, XM_021072668, XM_021072669	.	SMC5-SMC6 complex localization factor protein 2	Cluster001
LOC110256649	200	.	XM_021072807	.	uncharacterized LOC110256649	Cluster001
LOC110257476	98	.	XM_021078196	.	ankyrin repeat domain-containing protein 26-like	Cluster001
LOC110257710	16	.	XM_021079941, XM_021079942	.	protein BEX2-like	Cluster001
LOC110258247	392	.	XM_021081435	.	TBC1 domain family member 14-like	Cluster001
LOC110259371	368	.	XM_021084172, XM_021084173	.	zinc finger protein 555-like	Cluster001
LOC110259511	358	.	XM_021084903	.	protocadherin alpha-5-like	Cluster001
LOC110259520	2	.	XM_021084938	.	uncharacterized LOC110259520	Cluster001
LOC110260093	438	.	XM_021088112	.	zinc finger protein 75A-like	Cluster001
LOC110261292	44	.	XM_021097266	.	zinc finger protein OZF-like	Cluster001
LOC110261324	254	.	XM_021097336, XM_021097337	.	zinc finger protein 772-like	Cluster001
LOC110261685	371	.	XM_021099910	.	chromobox protein homolog 3	Cluster001
LPCAT1	128	ENSSSCG00000017116	ENSSSCT00000018634, XM_003134168, XM_005672624, XM_021076659, XM_021076660, XM_021076661, XM_021076662, XM_021076663, XM_021076664	16:79134368-79176787:+1	lysophosphatidylcholine acyltransferase 1	Cluster001
LRCH2	383	ENSSSCG00000012595	ENSSSCT00000028402, XM_021079893, XM_021079894	X:94489205-94589944:-1	leucine rich repeats and calponin homology domain containing 2	Cluster001
LRFN4	191	ENSSSCG00000039360	ENSSSCT00000043766, XM_021082774	2:5575685-5579968:-1	leucine rich repeat and fibronectin type III domain containing 4	Cluster001
LRFN5	170	ENSSSCG00000004990	ENSSSCT00000005504, ENSSSCT00000031857, ENSSSCT00000059729, XM_021101071, XM_021101076, XM_021101080, XM_021101095, XM_021101099, XM_021101105	1:171906198-172177720:+1	leucine rich repeat and fibronectin type III domain containing 5	Cluster001
LRIF1	100	ENSSSCG00000006799	ENSSSCT00000007447, XM_005663570, XM_013997274	4:109271762-109292310:+1	ligand dependent nuclear receptor interacting factor 1	Cluster001
LRIG2	91	ENSSSCG00000034581	ENSSSCT00000060304, XM_021090735, XM_021090736, XM_021090737, XM_021090738	4:107349169-107416936:-1	leucine rich repeats and immunoglobulin like domains 2	Cluster001
LRP12	3	ENSSSCG00000006039	ENSSSCT00000006628, ENSSSCT00000036698, ENSSSCT00000045729, XM_003125531	4:32701641-32791374:+1	LDL receptor related protein 12	Cluster001
LRP1B	92	.	XM_021076285	.	LDL receptor related protein 1B	Cluster001
LRP6	532	ENSSSCG00000000625	ENSSSCT00000000671, ENSSSCT00000039050, ENSSSCT00000059330, XM_021092344	5:60149026-60314764:+1	LDL receptor related protein 6	Cluster001
LRP8	299	ENSSSCG00000003848	ENSSSCT00000004260, ENSSSCT00000038531, ENSSSCT00000039248, ENSSSCT00000039265, ENSSSCT00000044937, ENSSSCT00000046538, ENSSSCT00000046680, ENSSSCT00000057960, XM_005665391, XM_005665392, XM_005665396, XM_005665397, XM_005665399, XM_013999360, XM_013999361, XM_021093228, XM_021093229, XM_021093230, XM_021093231, XM_021093232, XM_021093233, XM_021093234, XM_021093235, XM_021093236, XM_021093237	6:158798205-158982381:+1	LDL receptor related protein 8	Cluster001
LRRC3	559	ENSSSCG00000027975	ENSSSCT00000030032	13:207271416-207272189:+1	leucine rich repeat containing 3	Cluster001
LRRC3B	35	ENSSSCG00000011216	ENSSSCT00000012282, XM_003132076, XM_005669310, XM_005669311, XM_005669312, XM_013981425, XM_021071452, XM_021071453	13:13327220-13420223:+1	leucine rich repeat containing 3B	Cluster001
LRRC40	501	.	XM_003127928	.	leucine rich repeat containing 40	Cluster001
LRRC49	110	ENSSSCG00000004976	ENSSSCT00000005488, XM_005659880, XM_021100865	1:168553361-168700361:+1	leucine rich repeat containing 49	Cluster001
LRRC4C	79	ENSSSCG00000013286	ENSSSCT00000014510, ENSSSCT00000050552, XM_021085261, XM_021085262, XM_021085263, XM_021085264, XM_021085265, XM_021085266, XM_021085267, XM_021085268, XM_021085269, XM_021085270, XM_021085271, XM_021085272, XM_021085273, XM_021085274, XM_021085275	2:21458998-21633681:+1	leucine rich repeat containing 4C	Cluster001
LRRC55	4	ENSSSCG00000039445	ENSSSCT00000052323, XM_021082018	AEMK02000423.1:129776-134740:-1	leucine rich repeat containing 55	Cluster001
LRRC57	47	ENSSSCG00000004726	ENSSSCT00000005219, ENSSSCT00000060086	1:128839075-128847168:+1	leucine rich repeat containing 57	Cluster001
LRRC73	115	ENSSSCG00000001676	ENSSSCT00000001870, XM_005666036	7:38501970-38504718:-1	leucine rich repeat containing 73	Cluster001
LRRFIP2	2	ENSSSCG00000027738	ENSSSCT00000030165, ENSSSCT00000032516, ENSSSCT00000040569, ENSSSCT00000049081, ENSSSCT00000054886, ENSSSCT00000054952, ENSSSCT00000055811, ENSSSCT00000056221, ENSSSCT00000062518, ENSSSCT00000063136, XM_021071625, XM_021071626, XM_021071627, XM_021071628, XM_021071629, XM_021071630, XM_021071632, XM_021071633, XM_021071634, XM_021071635, XM_021071636, XM_021071637, XM_021071639, XM_021071640, XM_…	13:21670410-21793045:+1	LRR binding FLII interacting protein 2	Cluster001
LRRTM2	251	ENSSSCG00000034989	ENSSSCT00000043673	2:140803626-140809500:-1	leucine rich repeat transmembrane neuronal 2	Cluster001
LSM12	122	ENSSSCG00000032394	ENSSSCT00000049681, XM_021066900	12:19128564-19155006:+1	LSM12 homolog	Cluster001
LSM14B	251	ENSSSCG00000026052	ENSSSCT00000028398, ENSSSCT00000038192, ENSSSCT00000042965, ENSSSCT00000058755, ENSSSCT00000062294, XM_021078207, XM_021078208	17:61552551-61564814:+1	LSM family member 14B	Cluster001
LTV1	49	.	XM_021087123	.	LTV1 ribosome biogenesis factor	Cluster001
LUC7L3	597	.	XM_005668920, XM_005668921, XM_005668922, XM_013981051, XM_013981052, XM_013981053, XM_013981054, XM_013981055, XM_013981056, XM_013981057, XM_013981058, XM_021067189, XM_021067191	.	LUC7 like 3 pre-mRNA splicing factor	Cluster001
LYSMD3	187	ENSSSCG00000024193	ENSSSCT00000028243, ENSSSCT00000047391, XM_003123779	2:97689376-97703742:-1	LysM domain containing 3	Cluster001
LZIC	521	ENSSSCG00000033257	ENSSSCT00000047457, XM_021095309	6:70262721-70268355:-1	leucine zipper and CTNNBIP1 domain containing	Cluster001
MACF1	164	ENSSSCG00000003654	ENSSSCT00000004050, ENSSSCT00000039184, ENSSSCT00000040898, ENSSSCT00000043147, XM_021095983	6:95150836-95304767:+1	microtubule-actin crosslinking factor 1	Cluster001
MACROD2	178	.	XM_021077529, XM_021077530, XM_021077531, XM_021077532, XM_021077533	.	MACRO domain containing 2	Cluster001
MAF	104	ENSSSCG00000040607	ENSSSCT00000058989, ENSSSCT00000059924, ENSSSCT00000060599, XM_021097064, XM_021097065, XM_021097066	6:8468112-8485223:+1	MAF bZIP transcription factor	Cluster001
MAFB	555	ENSSSCG00000032251	ENSSSCT00000042890	17:43410388-43411359:-1	MAF bZIP transcription factor B	Cluster001
MAGI1	3	ENSSSCG00000011497	ENSSSCT00000012581, ENSSSCT00000045910, ENSSSCT00000048160, ENSSSCT00000052727, ENSSSCT00000054758, ENSSSCT00000060145, XM_005669707, XM_021070785, XM_021070786, XM_021070787, XM_021070788, XM_021070789, XM_021070790, XM_021070791, XM_021070792, XM_021070793, XM_021070794, XM_021070795, XM_021070796, XM_021070797, XM_021070798, XM_021070799, XM_021070800, XM_021070801, XM_021070802, XM_021070805,…	13:46897427-47160117:-1	membrane associated guanylate kinase, WW and PDZ domain containing 1	Cluster001
MAK16	74	ENSSSCG00000036947	ENSSSCT00000055346	AEMK02000697.1:129818-140965:+1	MAK16 homolog	Cluster001
MALT1	21	ENSSSCG00000004917	ENSSSCT00000005425, ENSSSCT00000034163, ENSSSCT00000049658, ENSSSCT00000053114, XM_021100024	1:162076966-162145116:-1	MALT1 paracaspase	Cluster001
MAML1	34	ENSSSCG00000014019	ENSSSCT00000015314, ENSSSCT00000055942, XM_003123646	2:78818411-78876615:-1	mastermind like transcriptional coactivator 1	Cluster001
MAML2	27	ENSSSCG00000034879	ENSSSCT00000062330, XM_021102334, XM_021102335	9:27901597-28371503:-1	mastermind like transcriptional coactivator 2	Cluster001
MAN1A2	279	ENSSSCG00000006730	ENSSSCT00000007372	4:103214939-103376673:-1	mannosidase alpha class 1A member 2	Cluster001
MAP2	272	ENSSSCG00000016151	ENSSSCT00000017584, ENSSSCT00000040723, ENSSSCT00000040998, ENSSSCT00000049207, ENSSSCT00000049285, ENSSSCT00000051658, ENSSSCT00000056033, ENSSSCT00000058063, ENSSSCT00000060395, ENSSSCT00000064026, XM_003483725, XM_003483727, XM_005672144, XM_005672145, XM_005672146, XM_005672147, XM_005672148, XM_005672149, XM_005672150, XM_013984443, XM_013984444, XM_013984445, XM_013984446, XM_013984447, XM_…	15:112156590-112463028:+1	microtubule associated protein 2	Cluster001
MAP2K6	10	ENSSSCG00000017254	ENSSSCT00000018783, ENSSSCT00000035633, XM_013980816, XM_021068116	12:10897104-11018943:-1	mitogen-activated protein kinase kinase 6	Cluster001
MAP3K13	708	ENSSSCG00000011791	ENSSSCT00000012903, ENSSSCT00000038300, ENSSSCT00000042825, ENSSSCT00000062873, XM_021069983, XM_021069984, XM_021069985, XM_021069986	13:123175808-123352777:+1	mitogen-activated protein kinase kinase kinase 13	Cluster001
MAP3K2	217	ENSSSCG00000030354	ENSSSCT00000022881, ENSSSCT00000030086, ENSSSCT00000056882, XM_003359437, XM_005671635	15:25086967-25175455:+1	mitogen-activated protein kinase kinase kinase 2	Cluster001
MAP3K7	7	ENSSSCG00000004334	ENSSSCT00000004790, ENSSSCT00000035193, ENSSSCT00000036555, XM_021082147	1:58481896-58548057:-1	mitogen-activated protein kinase kinase kinase 7	Cluster001
MAP4K3	505	ENSSSCG00000008475	ENSSSCT00000009277, ENSSSCT00000009278, ENSSSCT00000036710, ENSSSCT00000038995, ENSSSCT00000052650, ENSSSCT00000054876, ENSSSCT00000062184, XM_021088335, XM_021088336, XM_021088337, XM_021088338, XM_021088339, XM_021088340	3:100886834-101084677:+1	mitogen-activated protein kinase kinase kinase kinase 3	Cluster001
MAPK6	233	ENSSSCG00000004624	ENSSSCT00000005107, ENSSSCT00000041237, ENSSSCT00000050785, XM_005659599, XM_005659601, XM_013992986, XM_021095334, XM_021095339	1:119725029-119771400:-1	mitogen-activated protein kinase 6	Cluster001
MAPK8	740	ENSSSCG00000010380	ENSSSCT00000011362, ENSSSCT00000036610, ENSSSCT00000042018, XM_001929166, XM_013983427, XM_013983428, XM_021073085, XM_021073086, XM_021073087	14:88988909-89172200:+1	mitogen-activated protein kinase 8	Cluster001
MAPKAPK5	82	ENSSSCG00000009890	ENSSSCT00000010840	14:39849415-39886455:-1	mitogen-activated protein kinase-activated protein kinase 5	Cluster001
MAPKBP1	2	ENSSSCG00000004738	ENSSSCT00000005234, ENSSSCT00000005241, ENSSSCT00000064208, XM_021097365	1:129533534-129588095:-1	mitogen-activated protein kinase binding protein 1	Cluster001
MAPRE1	111	.	XM_005672836, XM_021077333, XM_021077334	.	microtubule associated protein RP/EB family member 1	Cluster001
MAPT	260	ENSSSCG00000017311	ENSSSCT00000018847, ENSSSCT00000036784, ENSSSCT00000042873, ENSSSCT00000044399, ENSSSCT00000054533, ENSSSCT00000065427, XM_021066799, XM_021066800, XM_021066801, XM_021066802, XM_021066803, XM_021066804, XM_021066805, XM_021066806, XM_021066807, XM_021066808, XM_021066809, XM_021066810, XM_021066811, XM_021066812, XM_021066813, XM_021066814, XM_021066815, XM_021066816, XM_021066817, XM_021066818,…	12:17098266-17211660:-1	microtubule associated protein tau	Cluster001
Mar-07	322	ENSSSCG00000015883	ENSSSCT00000017295, ENSSSCT00000031773, ENSSSCT00000040696, ENSSSCT00000044284, ENSSSCT00000052594, ENSSSCT00000053020, ENSSSCT00000065361, XM_001928215, XM_005657534, XM_005657535, XM_021074770, XM_021074771, XM_021074773, XM_021074774, XM_021074775, XM_021074776, XM_021074777, XM_021074779, XM_021074780, XM_021074781	15:66649426-66700961:+1	membrane associated ring-CH-type finger 7	Cluster001
MARK1	474	ENSSSCG00000010825	ENSSSCT00000011843, ENSSSCT00000029833, XM_021064328, XM_021064330, XM_021064333, XM_021064334, XM_021064335	10:9980297-10104869:+1	microtubule affinity regulating kinase 1	Cluster001
MARK3	396	ENSSSCG00000021669	ENSSSCT00000025561, ENSSSCT00000030398, ENSSSCT00000045831, ENSSSCT00000052125, ENSSSCT00000056626, XM_021081588, XM_021081589, XM_021081590, XM_021081591, XM_021081592, XM_021081594, XM_021081595, XM_021081596, XM_021081599, XM_021081600, XM_021081601	AEMK02000452.1:1942121-2055051:+1	microtubule affinity regulating kinase 3	Cluster001
MASP1	11	ENSSSCG00000011806	ENSSSCT00000025026, ENSSSCT00000033025, XM_005657109, XM_005657110, XM_013990145, XM_013990146, XM_021068204	13:124955030-125028339:-1	mannan binding lectin serine peptidase 1	Cluster001
MASP2	64	ENSSSCG00000003410	ENSSSCT00000035578	6:71224637-71243459:-1	mannan binding lectin serine peptidase 2	Cluster001
MATK	334	ENSSSCG00000013494	ENSSSCT00000014740, ENSSSCT00000052630, ENSSSCT00000055115, ENSSSCT00000062061, XM_005661345, XM_005661347, XM_013994776, XM_021084108	2:74875996-74918971:+1	megakaryocyte-associated tyrosine kinase	Cluster001
MATR3	332	.	XM_005661707, XM_005661708, XM_005661709, XM_005661710, XM_005661711, XM_005661713, XM_005661716, XM_013995179, XM_013995180, XM_021084847, XM_021084848, XM_021084849, XM_021084850, XM_021084851, XM_021084852, XM_021084853, XM_021084854, XM_021084855, XM_021084856, XM_021084857, XM_021084858, XM_021084859, XM_021084860, XM_021084861, XM_021084862, XM_021084863, XM_021084864, XM_021084865, XM_0210…	.	matrin 3	Cluster001
MAX	139	ENSSSCG00000037267	ENSSSCT00000039827, ENSSSCT00000050025, ENSSSCT00000051416, ENSSSCT00000063812, XM_005666317, XM_021099386	7:89136985-89168200:-1	MYC associated factor X	Cluster001
MB21D2	518	ENSSSCG00000011819	ENSSSCT00000012931, XM_021070058	13:129875636-129997215:-1	Mab-21 domain containing 2	Cluster001
MBD4	502	ENSSSCG00000033303	ENSSSCT00000036989, ENSSSCT00000053411, ENSSSCT00000056277, ENSSSCT00000061275, XM_021069359, XM_021069360, XM_021069361	13:68814823-68828964:-1	methyl-CpG binding domain 4, DNA glycosylase	Cluster001
MBD5	44	ENSSSCG00000015667	ENSSSCT00000017065, ENSSSCT00000053338, XM_021076098, XM_021076099, XM_021076101, XM_021076102, XM_021076103, XM_021076104, XM_021076105, XM_021076106, XM_021076107, XM_021076108, XM_021076109, XM_021076110, XM_021076111, XM_021076112, XM_021076113, XM_021076114, XM_021076115	15:3658230-3913196:-1	methyl-CpG binding domain protein 5	Cluster001
MBOAT2	13	ENSSSCG00000023539	ENSSSCT00000026647, ENSSSCT00000062153, XM_021087872, XM_021087873, XM_021087874, XM_021087875, XM_021087876	3:127243798-127364454:+1	membrane bound O-acyltransferase domain containing 2	Cluster001
MBTD1	209	ENSSSCG00000017592	ENSSSCT00000019153, ENSSSCT00000042742, ENSSSCT00000044386, ENSSSCT00000047530, XM_005668934, XM_005668935, XM_013981060, XM_013981061, XM_013981062, XM_013981063, XM_013981064, XM_013981065, XM_013981066, XM_013981067, XM_013981068, XM_013981069, XM_013981070, XM_013981071, XM_013981072, XM_013981073, XM_013981074, XM_013981077, XM_021067216, XM_021067217, XM_021067218, XM_021067219, XM_02106722…	12:27450806-27528894:-1	mbt domain containing 1	Cluster001
MCF2L	105	ENSSSCG00000021158	ENSSSCT00000025592, ENSSSCT00000027599, ENSSSCT00000042836, ENSSSCT00000054450, ENSSSCT00000054486, ENSSSCT00000060668, ENSSSCT00000063202, ENSSSCT00000063589, ENSSSCT00000066420, XM_021065948, XM_021065949, XM_021065951, XM_021065952, XM_021065953, XM_021065954, XM_021065955, XM_021065957, XM_021065958, XM_021065959, XM_021065960, XM_021065961, XM_021065962, XM_021065963, XM_021065964, XM_021065…	11:78408056-78505493:+1	MCF.2 cell line derived transforming sequence like	Cluster001
MCPH1	204	ENSSSCG00000015754	ENSSSCT00000017155, ENSSSCT00000038311, ENSSSCT00000065210, XM_021075800, XM_021075801, XM_021075802, XM_021075803, XM_021075805, XM_021075806, XM_021075807, XM_021075809	15:37455186-37672996:+1	microcephalin 1	Cluster001
MCU	83	ENSSSCG00000010290	ENSSSCT00000011262, ENSSSCT00000051380, ENSSSCT00000053226, XM_001925826, XM_021073096	14:75518528-75721500:+1	mitochondrial calcium uniporter	Cluster001
MDGA1	467	ENSSSCG00000001582	ENSSSCT00000001762, XM_001924567	7:33205704-33268272:-1	MAM domain containing glycosylphosphatidylinositol anchor 1	Cluster001
MDM1	33	.	XM_013997708	.	Mdm1 nuclear protein	Cluster001
MDM4	165	ENSSSCG00000015284	ENSSSCT00000016655, ENSSSCT00000030810, ENSSSCT00000038012, XM_013989569, XM_021063227, XM_021063228	9:65174849-65216958:+1	MDM4, p53 regulator	Cluster001
MDN1	102	ENSSSCG00000004328	ENSSSCT00000004784, XM_021089975	1:57661474-57826188:-1	midasin AAA ATPase 1	Cluster001
MED1	530	ENSSSCG00000017505	ENSSSCT00000019058, ENSSSCT00000037567, ENSSSCT00000041808, ENSSSCT00000048717, ENSSSCT00000050383, ENSSSCT00000052477, ENSSSCT00000066427, XM_005653933, XM_013979754, XM_013979755, XM_021067049, XM_021067050	12:22830449-22874698:+1	mediator complex subunit 1	Cluster001
MED13	455	ENSSSCG00000017672	ENSSSCT00000019236, XM_021067300	12:36333191-36429291:+1	mediator complex subunit 13	Cluster001
MED13L	722	ENSSSCG00000009864	ENSSSCT00000010812, ENSSSCT00000039293, ENSSSCT00000041331, ENSSSCT00000046098, ENSSSCT00000048241, XM_021073120, XM_021073121, XM_021073122, XM_021073123, XM_021073124, XM_021073125, XM_021073126, XM_021073127	14:36063644-36383803:+1	mediator complex subunit 13 like	Cluster001
MED14	54	ENSSSCG00000012250	ENSSSCT00000013396, ENSSSCT00000034029, XM_003135025	X:36354044-36424759:-1	mediator complex subunit 14	Cluster001
MED19	55	ENSSSCG00000013177	ENSSSCT00000014397, ENSSSCT00000055163, XM_003122715	2:13240812-13276703:+1	mediator complex subunit 19	Cluster001
MED23	222	ENSSSCG00000004196	ENSSSCT00000004637, ENSSSCT00000030957, ENSSSCT00000032585, XM_021087972	1:31960024-32001581:+1	mediator complex subunit 23	Cluster001
MED4	16	ENSSSCG00000035098	ENSSSCT00000042942, XM_013978727	11:19551906-19569138:+1	mediator complex subunit 4	Cluster001
MEF2C	563	ENSSSCG00000014149	ENSSSCT00000015453, ENSSSCT00000015454, ENSSSCT00000040441, ENSSSCT00000044826, ENSSSCT00000045699, ENSSSCT00000052217, ENSSSCT00000053215, ENSSSCT00000060135, ENSSSCT00000060625, ENSSSCT00000061557, XM_021082099, XM_021082100, XM_021082102, XM_021082108, XM_021082111, XM_021082115, XM_021082119, XM_021082124, XM_021082125, XM_021082128, XM_021082130, XM_021082131, XM_021082135, XM_021082136, XM_…	2:96122044-96296902:-1	myocyte enhancer factor 2C	Cluster001
MEIS2	58	ENSSSCG00000004795	ENSSSCT00000005294, ENSSSCT00000046011, ENSSSCT00000052424, XM_021098046, XM_021098049, XM_021098056, XM_021098058, XM_021098059, XM_021098065, XM_021098074, XM_021098093	1:134013820-134223013:+1	Meis homeobox 2	Cluster001
MESDC2	127	.	XM_001928863	.	mesoderm development candidate 2	Cluster001
METAP1	161	ENSSSCG00000009186	ENSSSCT00000010059, ENSSSCT00000043179	8:121291848-121352515:-1	methionyl aminopeptidase 1	Cluster001
METAP1D	1	ENSSSCG00000015951	ENSSSCT00000017368, ENSSSCT00000037166, ENSSSCT00000038650, ENSSSCT00000039058, ENSSSCT00000064271, XM_003133473, XM_021075524, XM_021075525, XM_021075526, XM_021075527	15:78098362-78186171:+1	methionyl aminopeptidase type 1D, mitochondrial	Cluster001
METAP2	618	ENSSSCG00000030608	ENSSSCT00000031290, ENSSSCT00000042676, XM_003126711, XM_005664247	5:87887322-87926148:-1	methionyl aminopeptidase 2	Cluster001
METTL14	66	ENSSSCG00000009113	ENSSSCT00000009980, ENSSSCT00000045916, ENSSSCT00000065060, XM_003129231	8:105019481-105054016:-1	methyltransferase like 14	Cluster001
MEX3B	269	ENSSSCG00000038491	ENSSSCT00000061628, XM_021098868, XM_021098869	7:50745371-50751777:-1	mex-3 RNA binding family member B	Cluster001
MFAP1	602	ENSSSCG00000040383	ENSSSCT00000066231, XM_001928118	1:127740718-127760475:+1	microfibrillar associated protein 1	Cluster001
MFAP3	779	ENSSSCG00000034706	ENSSSCT00000059470, ENSSSCT00000061307, XM_003134126, XM_013984905	16:69099805-69121516:-1	microfibrillar associated protein 3	Cluster001
MFAP5	247	ENSSSCG00000031712	ENSSSCT00000000722, ENSSSCT00000059209, XM_021090986, XM_021090989	5:62742315-62760258:+1	microfibrillar associated protein 5	Cluster001
MFN1	781	ENSSSCG00000039285	ENSSSCT00000039446, XM_021068493, XM_021068494	13:117404647-117441769:+1	mitofusin 1	Cluster001
MGA	433	ENSSSCG00000004739	ENSSSCT00000005235, ENSSSCT00000005236, ENSSSCT00000042707, ENSSSCT00000050299, ENSSSCT00000056991, ENSSSCT00000059374, XM_021097378	1:129594990-129697417:-1	MGA, MAX dimerization protein	Cluster001
MGEA5	656	.	XM_003483548, XM_021072730	.	meningioma expressed antigen 5 (hyaluronidase)	Cluster001
MIER1	407	ENSSSCG00000030423	ENSSSCT00000024138, ENSSSCT00000029681, ENSSSCT00000047796, ENSSSCT00000049924, ENSSSCT00000053204, ENSSSCT00000058649, XM_021096496, XM_021096498, XM_021096500, XM_021096502, XM_021096503, XM_021096505, XM_021096507, XM_021096508, XM_021096509, XM_021096510, XM_021096511, XM_021096512	6:145609621-145680649:-1	MIER1 transcriptional regulator	Cluster001
MIER3	285	ENSSSCG00000016920	ENSSSCT00000018427, ENSSSCT00000054760, XM_003359776, XM_013984794	16:35990469-36025436:-1	MIER family member 3	Cluster001
MINPP1	64	ENSSSCG00000010435	ENSSSCT00000011420, XM_001927672, XM_021072285	14:99574423-99628395:+1	multiple inositol-polyphosphate phosphatase 1	Cluster001
MLH1	68	ENSSSCG00000024222	ENSSSCT00000027443, ENSSSCT00000045094, ENSSSCT00000048017, ENSSSCT00000060208, XM_021068364, XM_021068365, XM_021068366	13:21788796-21877700:-1	mutL homolog 1	Cluster001
MLLT10	307	ENSSSCG00000011085	ENSSSCT00000012132, ENSSSCT00000040886, ENSSSCT00000048220, ENSSSCT00000049894, ENSSSCT00000050792, ENSSSCT00000051729, ENSSSCT00000052589, ENSSSCT00000062642, ENSSSCT00000064367, ENSSSCT00000065696, XM_003130784, XM_021064920, XM_021064921, XM_021064922, XM_021064923, XM_021064924, XM_021064925, XM_021064926, XM_021064927, XM_021064928, XM_021064929, XM_021064930, XM_021064931, XM_021064933, XM_…	10:53069736-53316041:-1	myeloid/lymphoid or mixed-lineage leukemia; translocated to, 10	Cluster001
MLLT3	589	ENSSSCG00000005166	ENSSSCT00000005694, ENSSSCT00000050425, ENSSSCT00000063612, XM_003121886, XM_013993520, XM_013993522	1:202317157-202602969:+1	MLLT3, super elongation complex subunit	Cluster001
MMP16	782	ENSSSCG00000006132	ENSSSCT00000006725, ENSSSCT00000048791	4:48556967-48862985:+1	matrix metallopeptidase 16	Cluster001
MN1	222	ENSSSCG00000009966	ENSSSCT00000010922, ENSSSCT00000048654, XM_021072488	14:45096485-45140570:-1	MN1 proto-oncogene, transcriptional regulator	Cluster001
MON2	109	ENSSSCG00000000458	ENSSSCT00000000494, ENSSSCT00000039671, ENSSSCT00000041357, ENSSSCT00000047696, ENSSSCT00000050175, XM_021091923, XM_021091924, XM_021091925, XM_021091926, XM_021091927, XM_021091929, XM_021091930, XM_021091931, XM_021091932, XM_021091933, XM_021091934, XM_021091935	5:27126040-27241940:+1	MON2 homolog, regulator of endosome-to-Golgi trafficking	Cluster001
MORC2	216	ENSSSCG00000010016	ENSSSCT00000010973, ENSSSCT00000061702, ENSSSCT00000061981, XM_005670851, XM_005670852, XM_005670853, XM_005670854, XM_013983067, XM_013983068, XM_021072947	14:47754236-47799700:-1	MORC family CW-type zinc finger 2	Cluster001
MORF4L1	225	.	XM_001927741, XM_001927754	.	mortality factor 4 like 1	Cluster001
MPHOSPH10	354	ENSSSCG00000004847	ENSSSCT00000005348, ENSSSCT00000005351, ENSSSCT00000044631, XM_021098803	1:143972593-144002978:-1	M-phase phosphoprotein 10	Cluster001
MPHOSPH6	65	.	XM_021097043	.	M-phase phosphoprotein 6	Cluster001
MPHOSPH8	186	ENSSSCG00000009570	ENSSSCT00000010491, ENSSSCT00000055001, ENSSSCT00000055032, ENSSSCT00000061826, XM_005668563	11:447019-480121:+1	M-phase phosphoprotein 8	Cluster001
MPP3	23	ENSSSCG00000017372	ENSSSCT00000018911, ENSSSCT00000057139, XM_003482975, XM_021066916	12:19296349-19322328:+1	membrane palmitoylated protein 3	Cluster001
MPP6	272	ENSSSCG00000016717	ENSSSCT00000018198, ENSSSCT00000037942, ENSSSCT00000047816, ENSSSCT00000048066, XM_021079247, XM_021079248, XM_021079250, XM_021079251, XM_021079252, XM_021079253, XM_021079254, XM_021079255, XM_021079256	18:47593299-47711918:-1	membrane palmitoylated protein 6	Cluster001
MPPED1	611	ENSSSCG00000038685	ENSSSCT00000028482, ENSSSCT00000046097, XM_021091406, XM_021091407	5:5415671-5496469:-1	metallophosphoesterase domain containing 1	Cluster001
MPPED2	1	ENSSSCG00000013327	ENSSSCT00000014554, XM_003122896, XM_005661062, XM_005661063, XM_005661064	2:30040338-30221001:+1	metallophosphoesterase domain containing 2	Cluster001
MRPL32	135	.	XM_003360208, XM_021079164	.	mitochondrial ribosomal protein L32	Cluster001
MRPL42	204	.	XM_005664266, XM_013998085	.	mitochondrial ribosomal protein L42	Cluster001
MRPS10	55	ENSSSCG00000001638	ENSSSCT00000001822, XM_003482185, XM_005665996, XM_005665997, XM_021098698	7:37317992-37329187:-1	mitochondrial ribosomal protein S10	Cluster001
MRPS22	57	ENSSSCG00000035771	ENSSSCT00000046001, ENSSSCT00000046463, XM_021069532, XM_021069533, XM_021069534, XM_021069535	13:80207596-80228463:+1	mitochondrial ribosomal protein S22	Cluster001
MRPS5	492	ENSSSCG00000008113	ENSSSCT00000008889, ENSSSCT00000057421, XM_003124819, XM_021087084, XM_021087085	3:46137527-46168495:+1	mitochondrial ribosomal protein S5	Cluster001
MRPS9	65	ENSSSCG00000028020	ENSSSCT00000027534, XM_021085713	3:49624901-49681786:-1	mitochondrial ribosomal protein S9	Cluster001
MSANTD2	69	ENSSSCG00000015201	ENSSSCT00000016567, XM_003130028, XM_021063065, XM_021063066	9:51997814-52028577:-1	Myb/SANT DNA binding domain containing 2	Cluster001
MSANTD3	184	.	XM_003353591, XM_003353592, XM_005660296, XM_005660297, XM_013993714	.	Myb/SANT DNA binding domain containing 3	Cluster001
MSANTD4	510	ENSSSCG00000026833	ENSSSCT00000023237, ENSSSCT00000042935, XM_005667291, XM_021062730, XM_021062731	9:35801628-35839530:-1	Myb/SANT DNA binding domain containing 4 with coiled-coils	Cluster001
MSL2	213	ENSSSCG00000011650	ENSSSCT00000012752, XM_001927762, XM_021069488	13:77146315-77180769:-1	male-specific lethal 2 homolog (Drosophila)	Cluster001
MSL3	99	ENSSSCG00000012114	ENSSSCT00000013251, ENSSSCT00000035623, ENSSSCT00000036487, XM_005673397, XM_013985884, XM_013985885	X:8519297-8535249:+1	male-specific lethal 3 homolog (Drosophila)	Cluster001
MSTN	60	ENSSSCG00000016047	ENSSSCT00000017472	15:94620269-94628630:-1	myostatin	Cluster001
MTA3	55	ENSSSCG00000008464	ENSSSCT00000009266, ENSSSCT00000024310, XM_021087577	3:97628900-97785518:-1	metastasis associated 1 family member 3	Cluster001
MTERF1	47	ENSSSCG00000015309	ENSSSCT00000016682, ENSSSCT00000039655, ENSSSCT00000046737, ENSSSCT00000049326, ENSSSCT00000051628, ENSSSCT00000064264	9:71845662-71853853:-1	mitochondrial transcription termination factor 1	Cluster001
MTF2	308	ENSSSCG00000006898	ENSSSCT00000007553, ENSSSCT00000034081, ENSSSCT00000038195, ENSSSCT00000046276, ENSSSCT00000047919, ENSSSCT00000054062, XM_003481511, XM_005663669, XM_021090203, XM_021090204, XM_021090205, XM_021090206, XM_021090207	4:124048806-124124440:-1	metal response element binding transcription factor 2	Cluster001
MTIF2	237	ENSSSCG00000008404	ENSSSCT00000009201, ENSSSCT00000051676, ENSSSCT00000058866, ENSSSCT00000064578, XM_013996153, XM_013996157, XM_021087524, XM_021087525, XM_021087526, XM_021087527, XM_021087528, XM_021087530	3:85948550-85992911:+1	mitochondrial translational initiation factor 2	Cluster001
MTOR	150	ENSSSCG00000003413	ENSSSCT00000003786, ENSSSCT00000049073, ENSSSCT00000052098, ENSSSCT00000054206, ENSSSCT00000055666, XM_003127584	6:71285103-71448662:-1	mechanistic target of rapamycin	Cluster001
MTRF1	479	ENSSSCG00000009436	ENSSSCT00000010343, ENSSSCT00000058161, ENSSSCT00000062595, XM_021065101, XM_021065102, XM_021065103	11:25603779-25642049:+1	mitochondrial translation release factor 1	Cluster001
MTSS1	405	ENSSSCG00000005975	ENSSSCT00000006558, ENSSSCT00000048216, ENSSSCT00000050441, ENSSSCT00000053820, ENSSSCT00000057400, XM_021088943, XM_021088944, XM_021088945, XM_021088946, XM_021088947, XM_021088948, XM_021088949	4:14933331-15105406:+1	MTSS1, I-BAR domain containing	Cluster001
MTUS2	470	ENSSSCG00000025996	ENSSSCT00000010215, ENSSSCT00000024217, ENSSSCT00000061559, ENSSSCT00000063663, XM_001928226, XM_021065168, XM_021065169, XM_021065170, XM_021065171, XM_021065172, XM_021065173, XM_021065174	11:6197696-6536052:+1	microtubule associated scaffold protein 2	Cluster001
MYCBP2	428	ENSSSCG00000009473	ENSSSCT00000010386, ENSSSCT00000043213, ENSSSCT00000044438, ENSSSCT00000051420, ENSSSCT00000065466, XM_021065732, XM_021065733, XM_021065734, XM_021065735, XM_021065736, XM_021065737, XM_021065738, XM_021065739, XM_021065740, XM_021065741, XM_021065742, XM_021065743, XM_021065744, XM_021065745, XM_021065746, XM_021065747, XM_021065748, XM_021065749, XM_021065750, XM_021065751, XM_021065752	11:49164685-49396395:-1	MYC binding protein 2, E3 ubiquitin protein ligase	Cluster001
MYEF2	740	ENSSSCG00000004661	ENSSSCT00000005147, ENSSSCT00000038900, ENSSSCT00000040099, ENSSSCT00000040489, ENSSSCT00000061412, ENSSSCT00000065720, XM_005654449, XM_005654450, XM_013985472	1:123582912-123638236:+1	myelin expression factor 2	Cluster001
MYO16	118	ENSSSCG00000009543	ENSSSCT00000010461, XM_021065905	11:75862667-76270810:+1	myosin XVI	Cluster001
MYO1B	1	ENSSSCG00000016061	ENSSSCT00000017486, ENSSSCT00000053923, ENSSSCT00000054157, ENSSSCT00000055105, ENSSSCT00000064666, XM_021075956, XM_021075957, XM_021075958, XM_021075959, XM_021075960, XM_021075961, XM_021075962, XM_021075963, XM_021075964, XM_021075966	15:95874398-96066990:+1	myosin IB	Cluster001
MYO5A	128	ENSSSCG00000004620	ENSSSCT00000005100, ENSSSCT00000005103, ENSSSCT00000038541, ENSSSCT00000038556, ENSSSCT00000038774, ENSSSCT00000061445, ENSSSCT00000064576, XM_001926768, XM_005659595, XM_013992979, XM_013992980, XM_013992981, XM_021095257, XM_021095261	1:119134571-119394725:+1	myosin VA	Cluster001
MYO9A	83	ENSSSCG00000004979	ENSSSCT00000005491, ENSSSCT00000036741, ENSSSCT00000038413, ENSSSCT00000050576, ENSSSCT00000057674, XM_021100877, XM_021100886, XM_021100896, XM_021100901, XM_021100912, XM_021100919, XM_021100928, XM_021100935, XM_021100939, XM_021100941, XM_021100946, XM_021100948, XM_021100955, XM_021100965, XM_021100967, XM_021100971, XM_021100980, XM_021100985, XM_021100994, XM_021101004, XM_021101009	1:169373981-169597167:-1	myosin IXA	Cluster001
MYSM1	137	ENSSSCG00000003830	ENSSSCT00000004239, ENSSSCT00000040154, ENSSSCT00000042998, ENSSSCT00000048732, XM_021096567, XM_021096568, XM_021096569, XM_021096570, XM_021096571, XM_021096572, XM_021096574, XM_021096575	6:153755746-153795535:+1	Myb like, SWIRM and MPN domains 1	Cluster001
MYT1L	593	ENSSSCG00000029334	ENSSSCT00000009465, ENSSSCT00000047435, ENSSSCT00000048417, ENSSSCT00000064273, ENSSSCT00000066391, XM_021087909, XM_021087910, XM_021087911, XM_021087912, XM_021087913, XM_021087914, XM_021087915, XM_021087916, XM_021087917, XM_021087918, XM_021087919, XM_021087920, XM_021087921, XM_021087922, XM_021087923, XM_021087924, XM_021087925, XM_021087926, XM_021087927, XM_021087928, XM_021087929, XM_02…	3:132197357-132295579:+1	myelin transcription factor 1 like	Cluster001
N4BP2	280	ENSSSCG00000008792	ENSSSCT00000009619, XM_021101117	8:31231943-31284621:+1	NEDD4 binding protein 2	Cluster001
N4BP2L2	25	.	XM_021065179	.	NEDD4 binding protein 2 like 2	Cluster001
NAA15	190	ENSSSCG00000009061	ENSSSCT00000009925, ENSSSCT00000043966, XM_003129186, XM_005656536	8:87607957-87691313:-1	N(alpha)-acetyltransferase 15, NatA auxiliary subunit	Cluster001
NAA16	234	ENSSSCG00000009435	ENSSSCT00000010342, ENSSSCT00000037355, ENSSSCT00000040117, ENSSSCT00000043268, ENSSSCT00000056551, ENSSSCT00000057964, ENSSSCT00000063298, XM_003482898, XM_021065626, XM_021065627, XM_021065628, XM_021065629, XM_021065630, XM_021065631, XM_021065632	11:25528896-25595133:-1	N(alpha)-acetyltransferase 16, NatA auxiliary subunit	Cluster001
NAA35	415	ENSSSCG00000010956	ENSSSCT00000011992, ENSSSCT00000064297, XM_021064637, XM_021064639, XM_021064640	10:29203195-29322663:-1	N(alpha)-acetyltransferase 35, NatC auxiliary subunit	Cluster001
NAA38	22	ENSSSCG00000017971	ENSSSCT00000019556, XM_013990019, XM_013990020	12:53111252-53112484:-1	N(alpha)-acetyltransferase 38, NatC auxiliary subunit	Cluster001
NAA60	146	ENSSSCG00000021065	ENSSSCT00000027346, ENSSSCT00000058855, ENSSSCT00000063029, XM_021088113, XM_021088114, XM_021088115, XM_021088117, XM_021088118	3:38762113-38782056:-1	N(alpha)-acetyltransferase 60, NatF catalytic subunit	Cluster001
NAE1	198	ENSSSCG00000035639	ENSSSCT00000052701, ENSSSCT00000062562, XM_021094010	6:27503833-27540045:-1	NEDD8 activating enzyme E1 subunit 1	Cluster001
NAMPT	909	ENSSSCG00000015435	ENSSSCT00000016815, ENSSSCT00000038868, ENSSSCT00000043478, ENSSSCT00000048249, ENSSSCT00000051475, ENSSSCT00000056432, XM_021102257	9:106119911-106162792:-1	nicotinamide phosphoribosyltransferase	Cluster001
NAV2	3	ENSSSCG00000013351	ENSSSCT00000014581, ENSSSCT00000027648, ENSSSCT00000042297, XM_021085301, XM_021085302, XM_021085303, XM_021085304, XM_021085305, XM_021085306, XM_021085307, XM_021085308, XM_021085309, XM_021085310, XM_021085311, XM_021085312, XM_021085313, XM_021085314, XM_021085315, XM_021085316	2:39262275-39704809:-1	neuron navigator 2	Cluster001
NAV3	209	ENSSSCG00000029249	ENSSSCT00000026141, ENSSSCT00000029790, ENSSSCT00000029841, ENSSSCT00000053657, ENSSSCT00000058522, XM_021093075, XM_021093077, XM_021093078, XM_021093079, XM_021093080, XM_021093081, XM_021093082, XM_021093083, XM_021093084, XM_021093085, XM_021093086, XM_021093087, XM_021093088, XM_021093089	5:103013806-103367627:-1	neuron navigator 3	Cluster001
NBEA	719	ENSSSCG00000034348	ENSSSCT00000010247, ENSSSCT00000049957, ENSSSCT00000058230, ENSSSCT00000061845, XM_021065191, XM_021065193, XM_021065194, XM_021065195, XM_021065196, XM_021065197, XM_021065198, XM_021065199, XM_021065200, XM_021065201, XM_021065202, XM_021065203, XM_021065204, XM_021065205, XM_021065206, XM_021065207	11:11084534-11723142:+1	neurobeachin	Cluster001
NBEAL1	321	.	XM_021075103, XM_021075104, XM_021075105, XM_021075106, XM_021075108, XM_021075109, XM_021075110	.	neurobeachin like 1	Cluster001
NBN	155	ENSSSCG00000006127	ENSSSCT00000006719, ENSSSCT00000033100, ENSSSCT00000035696, ENSSSCT00000039740, ENSSSCT00000043550, ENSSSCT00000047583, XM_021089136, XM_021089137	4:46787470-46903999:+1	nibrin	Cluster001
NCAM1	150	ENSSSCG00000015045	ENSSSCT00000016411, ENSSSCT00000032935, ENSSSCT00000034031, ENSSSCT00000034200, ENSSSCT00000036483, ENSSSCT00000037211, ENSSSCT00000043722, ENSSSCT00000065349, XM_005667344, XM_013979385, XM_021062793, XM_021062794, XM_021062795, XM_021062796, XM_021062797, XM_021062798, XM_021062799, XM_021062800, XM_021062801, XM_021062803, XM_021062804, XM_021062805, XM_021062806, XM_021062807, XM_021062808, X…	9:40721255-40960966:+1	neural cell adhesion molecule 1	Cluster001
NCAN	347	ENSSSCG00000032131	ENSSSCT00000041343, ENSSSCT00000041915, ENSSSCT00000057338, ENSSSCT00000065909, ENSSSCT00000066111, XM_021083438, XM_021083439	2:58638310-58669780:-1	neurocan	Cluster001
NCBP1	564	ENSSSCG00000005366	ENSSSCT00000005906, XM_021066300	1:239492573-239543924:+1	nuclear cap binding protein subunit 1	Cluster001
NCBP3	153	ENSSSCG00000017870	ENSSSCT00000019446, XM_003131866	12:49887162-49919580:-1	nuclear cap binding subunit 3	Cluster001
NCK1	12	ENSSSCG00000025701	ENSSSCT00000024187, ENSSSCT00000039212, XM_005669868, XM_021068315, XM_021068316	13:77863650-77942444:+1	NCK adaptor protein 1	Cluster001
NCL	389	ENSSSCG00000016275	ENSSSCT00000017723, XM_021074959, XM_021074960	15:132163463-132174219:-1	nucleolin	Cluster001
NCOA1	670	ENSSSCG00000008581	ENSSSCT00000009390, ENSSSCT00000009391, ENSSSCT00000039461, ENSSSCT00000039793, ENSSSCT00000047116, ENSSSCT00000064331, ENSSSCT00000065247, XM_021085897, XM_021085898, XM_021085899, XM_021085900, XM_021085902, XM_021085903, XM_021085904, XM_021085905, XM_021085907, XM_021085908	3:113996776-114250254:-1	nuclear receptor coactivator 1	Cluster001
NCOA2	303	ENSSSCG00000006194	ENSSSCT00000006788, ENSSSCT00000006789, ENSSSCT00000022649, ENSSSCT00000039136, ENSSSCT00000046265, ENSSSCT00000046801, ENSSSCT00000051622, ENSSSCT00000053898, ENSSSCT00000058022, XM_021088454, XM_021088455, XM_021088456, XM_021088458, XM_021088459, XM_021088460, XM_021088461, XM_021088462, XM_021088463	4:64953467-65245757:+1	nuclear receptor coactivator 2	Cluster001
NCOA4	137	ENSSSCG00000010399	ENSSSCT00000011383, ENSSSCT00000023429, ENSSSCT00000061091, XM_005671215, XM_005671216, XM_005671217, XM_013983445, XM_021071965, XM_021071966, XM_021071967, XM_021071968, XM_021071969, XM_021071970, XM_021071971, XM_021071972	14:90502540-90531287:-1	nuclear receptor coactivator 4	Cluster001
NCOA6	343	ENSSSCG00000007284	ENSSSCT00000007969, ENSSSCT00000056475, XM_013985296, XM_021078291, XM_021078292, XM_021078293, XM_021078294, XM_021078295, XM_021078297, XM_021078298, XM_021078299	17:38114290-38221888:-1	nuclear receptor coactivator 6	Cluster001
NDEL1	187	ENSSSCG00000017986	ENSSSCT00000019572, ENSSSCT00000027254, ENSSSCT00000028487, ENSSSCT00000041798, ENSSSCT00000049254, ENSSSCT00000057235, XM_005657052	12:53553914-53641355:+1	nudE neurodevelopment protein 1 like 1	Cluster001
NDUFV3	74	.	XM_003358981, XM_021071042	.	NADH:ubiquinone oxidoreductase subunit V3	Cluster001
NECAB1	70	ENSSSCG00000031424	ENSSSCT00000040864, XM_021089131	4:45982087-46239676:-1	N-terminal EF-hand calcium binding protein 1	Cluster001
NECTIN3	250	ENSSSCG00000011933	ENSSSCT00000013057, ENSSSCT00000034662, ENSSSCT00000055651, XM_021070395	13:148496547-148578631:-1	nectin cell adhesion molecule 3	Cluster001
NEDD4L	25	ENSSSCG00000004919	ENSSSCT00000005428, ENSSSCT00000005429, ENSSSCT00000037288, ENSSSCT00000043333, ENSSSCT00000053523, ENSSSCT00000054104, ENSSSCT00000065789, XM_021073843, XM_021073846, XM_021073859, XM_021073862, XM_021073866, XM_021073871, XM_021073873, XM_021073879, XM_021073884, XM_021073888, XM_021073893, XM_021073898, XM_021073911, XM_021073916	1:162364057-162737492:-1	neural precursor cell expressed, developmentally down-regulated 4-like, E3 ubiquitin protein ligase	Cluster001
NEK1	88	ENSSSCG00000009714	ENSSSCT00000010650, ENSSSCT00000010651, ENSSSCT00000037030, ENSSSCT00000042806, ENSSSCT00000053967, XM_013982714, XM_013982715, XM_013982716, XM_013982717, XM_013982718, XM_013982719, XM_013982720, XM_013982721, XM_013982722, XM_021072839, XM_021072840, XM_021072842, XM_021072843, XM_021072845, XM_021072846, XM_021072847, XM_021072849, XM_021072850, XM_021072851, XM_021072852, XM_021072853	14:20144601-20332251:+1	NIMA related kinase 1	Cluster001
NEK6	456	ENSSSCG00000005587	ENSSSCT00000006142, ENSSSCT00000028349, ENSSSCT00000047631, ENSSSCT00000057496, ENSSSCT00000058361, XM_003122163, XM_005660424, XM_013993856, XM_021068569, XM_021068570, XM_021068573, XM_021068576, XM_021068578	1:265078396-265170979:+1	NIMA related kinase 6	Cluster001
NELFA	68	ENSSSCG00000008681	ENSSSCT00000056909, XM_003128808	8:1018910-1038993:-1	negative elongation factor complex member A	Cluster001
NELL2	372	ENSSSCG00000000802	ENSSSCT00000000870, ENSSSCT00000045629, XM_021092577	5:75505099-75837399:-1	neural EGFL like 2	Cluster001
NEO1	644	ENSSSCG00000001921	ENSSSCT00000002150, ENSSSCT00000038420, ENSSSCT00000038620, ENSSSCT00000042691, ENSSSCT00000048908, ENSSSCT00000061626, XM_021099082, XM_021099083, XM_021099085, XM_021099086, XM_021099088, XM_021099089, XM_021099090, XM_021099091, XM_021099092, XM_021099094, XM_021099095, XM_021099096, XM_021099097, XM_021099098	7:60064987-60300782:-1	neogenin 1	Cluster001
NEPRO	3	ENSSSCG00000011923	ENSSSCT00000013047, ENSSSCT00000039315, ENSSSCT00000062362, XM_003132674, XM_003358816, XM_013982451, XM_021070377, XM_021070378, XM_021070379, XM_021070380	13:146902011-146915162:+1	nucleolus and neural progenitor protein	Cluster001
NETO2	458	ENSSSCG00000026318	ENSSSCT00000029975, ENSSSCT00000030872, XM_005664460, XM_005664461, XM_021094240	6:37443384-37504287:+1	neuropilin and tolloid like 2	Cluster001
NEUROD1	380	ENSSSCG00000016011	ENSSSCT00000017434	15:87175766-87179819:-1	neuronal differentiation 1	Cluster001
NEUROD6	196	ENSSSCG00000039501	ENSSSCT00000047047	18:41760555-41763831:+1	neuronal differentiation 6	Cluster001
NEXMIF	584	ENSSSCG00000035689	ENSSSCT00000043202	X:59974215-59979517:-1	neurite extension and migration factor	Cluster001
NF2	335	ENSSSCG00000028707	ENSSSCT00000010943, ENSSSCT00000044057, ENSSSCT00000045337, ENSSSCT00000065472, XM_003483446, XM_005670787, XM_013983029, XM_013983030	14:46653846-46726417:+1	neurofibromin 2	Cluster001
NFATC3	100	ENSSSCG00000029578	ENSSSCT00000025781, ENSSSCT00000048178, ENSSSCT00000048470, ENSSSCT00000050722, ENSSSCT00000051936, ENSSSCT00000057574, ENSSSCT00000062417, ENSSSCT00000063104, XM_021094122, XM_021094123, XM_021094124, XM_021094125, XM_021094126, XM_021094128, XM_021094129, XM_021094130	6:28666453-28828018:+1	nuclear factor of activated T-cells 3	Cluster001
NFE2L3	537	ENSSSCG00000026894	ENSSSCT00000027225, ENSSSCT00000036767, XM_021078977	18:46217517-46250307:-1	nuclear factor, erythroid 2 like 3	Cluster001
NFIL3	70	ENSSSCG00000009592	ENSSSCT00000010514, XM_001928870	14:2588896-2603255:-1	nuclear factor, interleukin 3 regulated	Cluster001
NFIX	67	ENSSSCG00000013742	ENSSSCT00000015016, ENSSSCT00000044397, ENSSSCT00000046203, ENSSSCT00000054859, ENSSSCT00000060421, ENSSSCT00000064426, XM_003123333, XM_005652881, XM_005652882, XM_005652883, XM_005652884, XM_013990839, XM_021083711, XM_021083712, XM_021083713	2:65954244-66057045:-1	nuclear factor I X	Cluster001
NFX1	184	ENSSSCG00000010994	ENSSSCT00000012035, XM_021064702	10:33126675-33200651:-1	nuclear transcription factor, X-box binding 1	Cluster001
NFXL1	116	ENSSSCG00000008816	ENSSSCT00000009646, ENSSSCT00000039491, ENSSSCT00000065602, XM_021100578, XM_021100580, XM_021100582, XM_021100583, XM_021100584	8:37797875-37875676:-1	nuclear transcription factor, X-box binding like 1	Cluster001
NFYA	144	ENSSSCG00000001611	ENSSSCT00000001780, ENSSSCT00000001791, ENSSSCT00000026056, ENSSSCT00000043871, ENSSSCT00000064178, XM_005665945, XM_005665948, XM_005665949, XM_013977884, XM_013977885, XM_013977886, XM_013977887, XM_013977888, XM_013977889, XM_013977891, XM_021097977, XM_021097978, XM_021097979, XM_021097980, XM_021097981	7:36386632-36409490:+1	nuclear transcription factor Y subunit alpha	Cluster001
NFYC	470	ENSSSCG00000003976	ENSSSCT00000004398, ENSSSCT00000038131, ENSSSCT00000040036, ENSSSCT00000040973, ENSSSCT00000041729, ENSSSCT00000044761, ENSSSCT00000046887, ENSSSCT00000051662, ENSSSCT00000054619, ENSSSCT00000061962, XM_013988928, XM_013988932, XM_021096974, XM_021096975, XM_021096976, XM_021096978, XM_021096980, XM_021096981, XM_021096982, XM_021096983, XM_021096984, XM_021096986, XM_021096987, XM_021096988	6:170413636-170486275:-1	nuclear transcription factor Y subunit gamma	Cluster001
NGLY1	202	ENSSSCG00000011214	ENSSSCT00000012280, ENSSSCT00000054526, ENSSSCT00000060480, ENSSSCT00000061148, XM_013981422, XM_021071437	13:12616566-12687404:-1	N-glycanase 1	Cluster001
NIN	589	ENSSSCG00000005022	ENSSSCT00000005538, ENSSSCT00000032295, ENSSSCT00000038837, ENSSSCT00000040667, ENSSSCT00000041637, ENSSSCT00000045235, ENSSSCT00000053603, ENSSSCT00000060723, ENSSSCT00000062524, XM_021101651, XM_021101655, XM_021101658, XM_021101660, XM_021101669, XM_021101671, XM_021101674, XM_021101678, XM_021101685, XM_021101688, XM_021101690, XM_021101696, XM_021101701, XM_021101710, XM_021101716, XM_021101…	1:180479612-180553674:-1	ninein	Cluster001
NIPBL	422	ENSSSCG00000016842	ENSSSCT00000018339, ENSSSCT00000038335, ENSSSCT00000055899, ENSSSCT00000060078, ENSSSCT00000060510, ENSSSCT00000062716, XM_013984737, XM_021076590, XM_021076591, XM_021076593	16:22152469-22363821:+1	NIPBL, cohesin loading factor	Cluster001
NKRF	195	ENSSSCG00000012620	ENSSSCT00000013799, XM_001927183	X:98008180-98025428:-1	NFKB repressing factor	Cluster001
NKTR	332	ENSSSCG00000011284	ENSSSCT00000012354, ENSSSCT00000037714, ENSSSCT00000040672, ENSSSCT00000043993, ENSSSCT00000044830, ENSSSCT00000051375, ENSSSCT00000054499, ENSSSCT00000061772, ENSSSCT00000065120, XM_003132134, XM_005669406, XM_005669411, XM_005669412, XM_021071701, XM_021071702, XM_021071703, XM_021071704, XM_021071705, XM_021071706	13:26125110-26176400:+1	natural killer cell triggering receptor	Cluster001
NLGN1	409	ENSSSCG00000011756	ENSSSCT00000012867, XM_013990139, XM_013990140, XM_013990141, XM_021071174, XM_021071175, XM_021071176, XM_021071177, XM_021071178, XM_021071179, XM_021071180, XM_021071181, XM_021071182, XM_021071183, XM_021071184	13:112715653-112723675:+1	neuroligin 1	Cluster001
NLN	688	ENSSSCG00000016778	ENSSSCT00000018265, ENSSSCT00000018459, ENSSSCT00000025746, ENSSSCT00000030122, ENSSSCT00000032566, ENSSSCT00000058641, ENSSSCT00000061113, XM_005672488, XM_005672490, XM_005672491, XM_021076576	16:44225682-44345658:+1	neurolysin	Cluster001
NME7	624	ENSSSCG00000006294	ENSSSCT00000006898, ENSSSCT00000036864, ENSSSCT00000054580, ENSSSCT00000063322, XM_021089439, XM_021089440, XM_021089442	4:81639167-81915931:+1	NME/NM23 family member 7	Cluster001
NOL4	614	ENSSSCG00000003737	ENSSSCT00000004137, ENSSSCT00000048913, ENSSSCT00000064714, XM_013999281, XM_021096222, XM_021096223, XM_021096224, XM_021096225, XM_021096226, XM_021096227	6:117630317-118087996:-1	nucleolar protein 4	Cluster001
NOL4L	116	ENSSSCG00000007249	ENSSSCT00000007931, ENSSSCT00000057453, XM_013985246, XM_013985247, XM_021077429, XM_021077430, XM_021077431	17:36070838-36201223:-1	nucleolar protein 4 like	Cluster001
NOL9	143	ENSSSCG00000030253	ENSSSCT00000027328, XM_003127541	6:67375196-67396430:-1	nucleolar protein 9	Cluster001
NOLC1	252	ENSSSCG00000010576	ENSSSCT00000011569, XM_005671408, XM_005671409, XM_005671410	14:113154829-113168812:+1	nucleolar and coiled-body phosphoprotein 1	Cluster001
NOP14	184	ENSSSCG00000008693	ENSSSCT00000009511, ENSSSCT00000060788, XM_005666511	8:1715015-1738098:-1	NOP14 nucleolar protein	Cluster001
NOP53	111	ENSSSCG00000022774	ENSSSCT00000025029, XM_021094646	6:53443490-53451707:+1	NOP53 ribosome biogenesis factor	Cluster001
NOP58	793	ENSSSCG00000022225	ENSSSCT00000029321, ENSSSCT00000046156, ENSSSCT00000059894, ENSSSCT00000066257, XM_021075920, XM_021075921, XM_021075922, XM_021075923	15:105893108-105926771:+1	NOP58 ribonucleoprotein	Cluster001
NPR3	60	ENSSSCG00000036201	ENSSSCT00000052412, ENSSSCT00000064963, XM_021077059, XM_021077061	16:18842039-18929808:+1	natriuretic peptide receptor 3	Cluster001
NR2C1	211	ENSSSCG00000000902	ENSSSCT00000000986, ENSSSCT00000058032, XM_005664254, XM_013998075	5:88231262-88277997:+1	nuclear receptor subfamily 2 group C member 1	Cluster001
NR2C2	41	ENSSSCG00000011594	ENSSSCT00000012690, ENSSSCT00000057618, XM_003132387, XM_005669805	13:69466291-69576914:-1	nuclear receptor subfamily 2 group C member 2	Cluster001
NREP	633	ENSSSCG00000034993	ENSSSCT00000041215, ENSSSCT00000041288, ENSSSCT00000053014, ENSSSCT00000061913, XM_021084630, XM_021084631	2:117698188-117868243:+1	neuronal regeneration related protein	Cluster001
NRF1	260	ENSSSCG00000016566	ENSSSCT00000018036, ENSSSCT00000027878, ENSSSCT00000045355, ENSSSCT00000048237, XM_021078996, XM_021078997, XM_021078998, XM_021078999, XM_021079000	18:19008420-19142666:-1	nuclear respiratory factor 1	Cluster001
NRG3	131	.	XM_001927008	.	neuregulin 3	Cluster001
NRIP1	601	ENSSSCG00000021038	ENSSSCT00000028007, ENSSSCT00000037452, XM_013982535, XM_021070820	13:179826141-179915149:-1	nuclear receptor interacting protein 1	Cluster001
NRXN1	364	ENSSSCG00000008419	ENSSSCT00000009219, ENSSSCT00000054223, ENSSSCT00000054247, XM_013996170, XM_021088233, XM_021088235, XM_021088236, XM_021088237, XM_021088238, XM_021088239, XM_021088240, XM_021088241, XM_021088242, XM_021088243, XM_021088245, XM_021088246, XM_021088247, XM_021088248, XM_021088249, XM_021088250, XM_021088251, XM_021088252, XM_021088253, XM_021088254, XM_021088256, XM_021088257, XM_021088258, XM_…	3:90221941-90381796:+1	neurexin 1	Cluster001
NSD1	626	ENSSSCG00000014044	ENSSSCT00000015341, ENSSSCT00000053942, ENSSSCT00000055036, ENSSSCT00000059399, ENSSSCT00000061395, ENSSSCT00000066090, XM_021084398, XM_021084399, XM_021084400, XM_021084401, XM_021084402, XM_021084404, XM_021084405, XM_021084406, XM_021084407, XM_021084408, XM_021084409	2:80654373-80809689:-1	nuclear receptor binding SET domain protein 1	Cluster001
NSD3	615	ENSSSCG00000015820	ENSSSCT00000017228, ENSSSCT00000039934, ENSSSCT00000047326, ENSSSCT00000051362, ENSSSCT00000053196, ENSSSCT00000061612, XM_013984071, XM_021075907, XM_021075908, XM_021075909, XM_021075910, XM_021075912, XM_021075913, XM_021075914, XM_021075915, XM_021075916	15:48136362-48241800:+1	nuclear receptor binding SET domain protein 3	Cluster001
NSG1	256	ENSSSCG00000024892	ENSSSCT00000029547, ENSSSCT00000041778, ENSSSCT00000044341	8:5999713-6024769:-1	neuronal vesicle trafficking associated 1	Cluster001
NSRP1	105	ENSSSCG00000017795	ENSSSCT00000019367, ENSSSCT00000039625, ENSSSCT00000049541, ENSSSCT00000055126, ENSSSCT00000065018, XM_003131784, XM_013981200, XM_021067519	12:46206694-46272767:+1	nuclear speckle splicing regulatory protein 1	Cluster001
NT5DC3	346	ENSSSCG00000000853	ENSSSCT00000000930, ENSSSCT00000023398, XM_005664189	5:80644245-80688504:+1	5 -nucleotidase domain containing 3	Cluster001
NUCB2	51	.	XM_021083276	.	nucleobindin 2	Cluster001
NUDCD1	139	ENSSSCG00000006029	ENSSSCT00000006617, ENSSSCT00000030070, XM_021089013, XM_021089014	4:28203731-28320285:+1	NudC domain containing 1	Cluster001
NUDT21	255	ENSSSCG00000034521	ENSSSCT00000036721	6:29339841-29363300:+1	nudix hydrolase 21	Cluster001
NUDT9	16	ENSSSCG00000009223	ENSSSCT00000010102, ENSSSCT00000057325, XM_003357086, XM_003357087, XM_005667017	8:131441496-131472934:-1	nudix hydrolase 9	Cluster001
NUFIP2	33	ENSSSCG00000017785	ENSSSCT00000019357, ENSSSCT00000045233, ENSSSCT00000053347	12:45479109-45507024:-1	nuclear FMR1 interacting protein 2	Cluster001
NUP107	341	ENSSSCG00000000486	ENSSSCT00000000524, XM_021091970	5:32989781-33040561:+1	nucleoporin 107	Cluster001
NUP133	383	ENSSSCG00000010189	ENSSSCT00000011155, ENSSSCT00000044258, ENSSSCT00000055091, ENSSSCT00000060983, ENSSSCT00000063443, XM_001928164, XM_021073899	14:60353554-60408969:+1	nucleoporin 133	Cluster001
NUP153	487	ENSSSCG00000026034	ENSSSCT00000025406, ENSSSCT00000044984, ENSSSCT00000047490, ENSSSCT00000062257, XM_001926651, XM_013977453, XM_013977458	7:13393535-13466582:-1	nucleoporin 153	Cluster001
NUP50	474	ENSSSCG00000000019	ENSSSCT00000000020, ENSSSCT00000059699, XM_021091395, XM_021091396	5:4197544-4219415:-1	nucleoporin 50	Cluster001
NUP58	40	ENSSSCG00000035318	ENSSSCT00000049377, ENSSSCT00000052216, ENSSSCT00000061533	11:3225223-3266161:+1	nucleoporin 58	Cluster001
NUP93	487	ENSSSCG00000025830	ENSSSCT00000032448, ENSSSCT00000042209, ENSSSCT00000048077, ENSSSCT00000062353, ENSSSCT00000064311, ENSSSCT00000064346, XM_021093394, XM_021093395, XM_021093397	6:18707989-18827890:+1	nucleoporin 93	Cluster001
NUTF2	414	.	XM_003126922	.	nuclear transport factor 2	Cluster001
NXPH2	138	ENSSSCG00000040715	ENSSSCT00000066085, XM_003133263	15:12953133-13074476:+1	neurexophilin 2	Cluster001
NYAP1	36	ENSSSCG00000030337	ENSSSCT00000030909, ENSSSCT00000047715, ENSSSCT00000060448, XM_005661909, XM_013995446, XM_013995448, XM_013995449, XM_013995450	3:8408413-8419945:+1	neuronal tyrosine phosphorylated phosphoinositide-3-kinase adaptor 1	Cluster001
ODR4	160	ENSSSCG00000015577	ENSSSCT00000016970	9:127540486-127580978:+1	odr-4 GPCR localization factor homolog	Cluster001
OGT	706	.	XM_005673712, XM_005673713, XM_013986235, XM_013986236, XM_021079577	.	O-linked N-acetylglucosamine (GlcNAc) transferase	Cluster001
OLA1	619	ENSSSCG00000015963	ENSSSCT00000017382, XM_021076152	15:80081982-80252347:-1	Obg like ATPase 1	Cluster001
ORC3	331	ENSSSCG00000004306	ENSSSCT00000004761, ENSSSCT00000037698, ENSSSCT00000044632, XM_003121290, XM_021089812, XM_021089821, XM_021089832	1:55954149-56044246:+1	origin recognition complex subunit 3	Cluster001
ORC4	333	ENSSSCG00000015668	ENSSSCT00000017066, ENSSSCT00000042728, ENSSSCT00000046525, XM_005671603, XM_005671604, XM_005671606, XM_013983928, XM_021076117, XM_021076118, XM_021076119, XM_021076120, XM_021076121, XM_021076123	15:4096539-4176080:+1	origin recognition complex subunit 4	Cluster001
ORC5	108	ENSSSCG00000015427	ENSSSCT00000016806, ENSSSCT00000052367, ENSSSCT00000056919, XM_021063496	9:104050105-104166839:-1	origin recognition complex subunit 5	Cluster001
OSBPL11	332	ENSSSCG00000026753	ENSSSCT00000030116, ENSSSCT00000048458	13:134718351-134807146:+1	oxysterol binding protein like 11	Cluster001
OSBPL8	510	ENSSSCG00000027503	ENSSSCT00000000566, ENSSSCT00000029484, ENSSSCT00000046802, ENSSSCT00000048486, ENSSSCT00000049557, ENSSSCT00000057968, XM_005655647, XM_013988326, XM_013988327, XM_021092052, XM_021092053, XM_021092054	5:39545743-39744655:-1	oxysterol binding protein like 8	Cluster001
OTUD3	1	ENSSSCG00000039652	ENSSSCT00000047279, XM_021095471, XM_021095472	6:78241624-78273539:+1	OTU deubiquitinase 3	Cluster001
OTUD4	334	ENSSSCG00000009042	ENSSSCT00000009902, ENSSSCT00000044496, XM_021100662	8:83240174-83288234:+1	OTU deubiquitinase 4	Cluster001
OTUD6B	15	ENSSSCG00000006120	ENSSSCT00000006712, XM_003125574	4:45776588-45793161:-1	OTU domain containing 6B	Cluster001
PA2G4	464	.	XM_013988304, XM_021091800	.	proliferation-associated 2G4	Cluster001
PABPC1	657	ENSSSCG00000006063	ENSSSCT00000006652, ENSSSCT00000032533, ENSSSCT00000046615, ENSSSCT00000052873, XM_001927747	4:36137639-36228348:+1	poly(A) binding protein cytoplasmic 1	Cluster001
PAF1	429	ENSSSCG00000022442	ENSSSCT00000036353, XM_003359387, XM_005657495, XM_021094369	6:48046497-48054189:-1	PAF1 homolog, Paf1/RNA polymerase II complex component	Cluster001
PAFAH1B1	229	ENSSSCG00000017836	ENSSSCT00000019411, ENSSSCT00000060830, ENSSSCT00000061836, XM_005657017, XM_005657018, XM_013990003	12:48614787-48735835:+1	platelet activating factor acetylhydrolase 1b regulatory subunit 1	Cluster001
PAK3	193	ENSSSCG00000025306	ENSSSCT00000026617, ENSSSCT00000031369, ENSSSCT00000040422, ENSSSCT00000056897, ENSSSCT00000059816, ENSSSCT00000060987, XM_021080675, XM_021080676, XM_021080677, XM_021080678, XM_021080679, XM_021080680, XM_021080681, XM_021080682, XM_021080683, XM_021080684, XM_021080685, XM_021080686, XM_021080687, XM_021080688, XM_021080689, XM_021080690	X:91111212-91239440:+1	p21 (RAC1) activated kinase 3	Cluster001
PAK5	646	ENSSSCG00000007061	ENSSSCT00000007732, ENSSSCT00000050312, ENSSSCT00000063545, ENSSSCT00000064294, XM_021077405, XM_021077407	17:18461062-18785668:-1	p21 (RAC1) activated kinase 5	Cluster001
PALM2	186	ENSSSCG00000033120	ENSSSCT00000005995, ENSSSCT00000005996, ENSSSCT00000040771, ENSSSCT00000047793, ENSSSCT00000053208, ENSSSCT00000059579, ENSSSCT00000062069, ENSSSCT00000063147, ENSSSCT00000066152	1:250680933-251190886:+1	A-kinase anchoring protein 2	Cluster001
PALM3	394	ENSSSCG00000013767	ENSSSCT00000015041, XM_013994670	2:65117179-65130442:+1	paralemmin 3	Cluster001
PANX1	42	ENSSSCG00000032360	ENSSSCT00000064694	9:26443652-26491004:+1	pannexin 1	Cluster001
PAPD4	35	.	XM_003123752, XM_005661515, XM_021084486, XM_021084487, XM_021084488, XM_021084489	.	poly(A) RNA polymerase D4, non-canonical	Cluster001
PAPD5	353	.	XM_021094215, XM_021094216, XM_021094217	.	poly(A) RNA polymerase D5, non-canonical	Cluster001
PAPOLG	720	ENSSSCG00000008389	ENSSSCT00000009186, ENSSSCT00000054449, ENSSSCT00000065722, XM_013996138	3:80989887-81025336:-1	poly(A) polymerase gamma	Cluster001
PARP6	48	ENSSSCG00000001929	ENSSSCT00000002158, ENSSSCT00000052668	7:60971884-60999864:+1	pyruvate kinase, muscle	Cluster001
PARP8	288	ENSSSCG00000016882	ENSSSCT00000018386, ENSSSCT00000050412, ENSSSCT00000061136	16:30304868-30486410:+1	poly(ADP-ribose) polymerase family member 8	Cluster001
PAXBP1	626	ENSSSCG00000012037	ENSSSCT00000013169, XM_003132753	13:196336959-196371263:-1	PAX3 and PAX7 binding protein 1	Cluster001
PBDC1	645	ENSSSCG00000030577	ENSSSCT00000031316, ENSSSCT00000040393, ENSSSCT00000046045, ENSSSCT00000046347, ENSSSCT00000054421	X:60888347-60919342:+1	protein PBDC1	Cluster001
PBRM1	748	ENSSSCG00000035824	ENSSSCT00000041273, ENSSSCT00000044065, ENSSSCT00000048799, ENSSSCT00000057913, ENSSSCT00000058421, ENSSSCT00000058608, ENSSSCT00000059908, XM_021068902, XM_021068903, XM_021068904, XM_021068905, XM_021068906, XM_021068908, XM_021068909, XM_021068911, XM_021068912, XM_021068913, XM_021068914, XM_021068915, XM_021068916, XM_021068917, XM_021068918, XM_021068919, XM_021068920, XM_021068921, XM_0210…	13:34689711-34820952:-1	polybromo 1	Cluster001
PBX1	495	ENSSSCG00000006331	ENSSSCT00000006939, ENSSSCT00000042595, ENSSSCT00000043973, ENSSSCT00000053615, XM_001927886, XM_003355078, XM_005655372, XM_005655374, XM_013988079	4:85821494-86170191:-1	PBX homeobox 1	Cluster001
PCDH10	86	.	XM_021101591	.	protocadherin 10	Cluster001
PCDH11X	188	.	XM_005673778, XM_021080409, XM_021080410, XM_021080411, XM_021080413, XM_021080414, XM_021080415, XM_021080416, XM_021080417, XM_021080418	.	protocadherin 11 X-linked	Cluster001
PCDH17	48	ENSSSCG00000009446	ENSSSCT00000010354, ENSSSCT00000046242, ENSSSCT00000058295, XM_001927267, XM_005668457, XM_013980574, XM_021065647	11:30511295-30611728:+1	protocadherin 17	Cluster001
PCDH19	356	ENSSSCG00000012479	ENSSSCT00000013646, ENSSSCT00000050189, XM_021079756, XM_021079757	X:82036205-82151453:-1	protocadherin 19	Cluster001
PCDH8	44	ENSSSCG00000009445	ENSSSCT00000010353	11:26127401-26132123:-1	protocadherin-8	Cluster001
PCDHA11	371	ENSSSCG00000024998	ENSSSCT00000051874, ENSSSCT00000054343, XM_021084899	2:142533601-142547107:+1	protocadherin alpha 11	Cluster001
PCDHA4	3	ENSSSCG00000025603	ENSSSCT00000057267	2:142486346-142490452:+1	protocadherin alpha 4	Cluster001
PCDHAC2	495	ENSSSCG00000029281	ENSSSCT00000026037, ENSSSCT00000026168, ENSSSCT00000027565, ENSSSCT00000030809, ENSSSCT00000030832, ENSSSCT00000042875, ENSSSCT00000049424, ENSSSCT00000056174, ENSSSCT00000058195	2:142472588-142688089:+1	protocadherin alpha-C2	Cluster001
PCDHB2	40	ENSSSCG00000014379	ENSSSCT00000015709, ENSSSCT00000041474, ENSSSCT00000045430, ENSSSCT00000047469	2:142802270-142809530:+1	protocadherin beta-2-like	Cluster001
PCF11	247	ENSSSCG00000014901	ENSSSCT00000016256, ENSSSCT00000043941, XM_003129708, XM_013979192, XM_021062577, XM_021062578	9:17297867-17324710:+1	PCF11 cleavage and polyadenylation factor subunit	Cluster001
PCGF3	556	ENSSSCG00000029983	ENSSSCT00000030851, XM_021100823, XM_021100824, XM_021100826, XM_021100827, XM_021100828	8:140496-182263:+1	polycomb group ring finger 3	Cluster001
PCM1	520	ENSSSCG00000006994	ENSSSCT00000007659, ENSSSCT00000048607, ENSSSCT00000049226, ENSSSCT00000052942, ENSSSCT00000055887, ENSSSCT00000060136, ENSSSCT00000065244, XM_021077902, XM_021077903, XM_021077904, XM_021077905, XM_021077906, XM_021077907, XM_021077908, XM_021077909, XM_021077910, XM_021077911, XM_021077912, XM_021077913, XM_021077914, XM_021077915, XM_021077916, XM_021077917, XM_021077918, XM_021077919, XM_0210…	17:5596385-5690349:+1	pericentriolar material 1	Cluster001
PCNX1	182	ENSSSCG00000002330	ENSSSCT00000002593, ENSSSCT00000045706, ENSSSCT00000054657, ENSSSCT00000055338, ENSSSCT00000057905, XM_021099420, XM_021099421, XM_021099422, XM_021099423, XM_021099424, XM_021099425	7:94445384-94617925:+1	pecanex homolog 1 (Drosophila)	Cluster001
PCNX4	49	ENSSSCG00000005082	ENSSSCT00000005601, ENSSSCT00000042041, ENSSSCT00000063751	1:189110458-189151734:+1	pecanex 4	Cluster001
PCYT1B	375	ENSSSCG00000012182	ENSSSCT00000033023, ENSSSCT00000034176, ENSSSCT00000035302, ENSSSCT00000043770, ENSSSCT00000043930, XM_001927679, XM_005673506, XM_013986017, XM_021080539, XM_021080540	X:20605672-20743256:-1	phosphate cytidylyltransferase 1, choline, beta	Cluster001
PDCD10	300	ENSSSCG00000011739	ENSSSCT00000012850, ENSSSCT00000037934, ENSSSCT00000044943, ENSSSCT00000045799, ENSSSCT00000062372, XM_005669964, XM_005669965, XM_005669966, XM_013982176, XM_021068277, XM_021068278, XM_021068280	13:106517359-106559618:-1	programmed cell death 10	Cluster001
PDCD11	113	ENSSSCG00000010599	ENSSSCT00000011593, ENSSSCT00000011594, ENSSSCT00000065062, XM_021073482, XM_021073483	14:114327372-114382011:+1	programmed cell death 11	Cluster001
PDE4D	246	ENSSSCG00000016929	ENSSSCT00000018436, ENSSSCT00000038029, ENSSSCT00000049775, ENSSSCT00000051425, ENSSSCT00000053937, ENSSSCT00000059868, ENSSSCT00000066377, XM_013984797, XM_021076863, XM_021076864, XM_021076865, XM_021076866, XM_021076867, XM_021076868, XM_021076869, XM_021076870, XM_021076871, XM_021076872, XM_021076873, XM_021076874, XM_021076875, XM_021076876, XM_021076877, XM_021076879, XM_021076881, XM_0210…	16:37897302-38315961:-1	phosphodiesterase 4D	Cluster001
PDS5A	121	ENSSSCG00000023112	ENSSSCT00000029818, ENSSSCT00000045596, ENSSSCT00000046561, ENSSSCT00000047810, ENSSSCT00000048475, ENSSSCT00000060181	8:30988370-31134033:-1	PDS5 cohesin associated factor A	Cluster001
PDS5B	555	ENSSSCG00000009345	ENSSSCT00000010242, ENSSSCT00000051730, ENSSSCT00000063159, XM_021065557, XM_021065558, XM_021065559, XM_021065561, XM_021065563, XM_021065564, XM_021065565	11:9014746-9223029:+1	PDS5 cohesin associated factor B	Cluster001
PDZD8	60	.	XM_001927541	.	PDZ domain containing 8	Cluster001
PDZRN3	449	ENSSSCG00000011521	ENSSSCT00000012609, ENSSSCT00000044502, XM_013980617, XM_021069221	13:54659589-54707478:-1	PDZ domain containing ring finger 3	Cluster001
PEBP1	23	.	XM_003132890, XM_021073057	.	phosphatidylethanolamine binding protein 1	Cluster001
PELI1	658	ENSSSCG00000028947	ENSSSCT00000009160, ENSSSCT00000028590, ENSSSCT00000040046, ENSSSCT00000049485, ENSSSCT00000065632, XM_021087455	3:77740470-77796910:+1	pellino E3 ubiquitin protein ligase 1	Cluster001
PEX1	392	ENSSSCG00000029967	ENSSSCT00000022601, ENSSSCT00000041458, XM_003357437, XM_021102380	9:72385475-72444670:-1	peroxisomal biogenesis factor 1	Cluster001
PFDN1	138	ENSSSCG00000038493	ENSSSCT00000044478, XM_005661736	2:141991319-142077913:-1	prefoldin subunit 1	Cluster001
PGAP1	415	ENSSSCG00000016073	ENSSSCT00000017500, ENSSSCT00000023196, XM_021075855, XM_021075856, XM_021075857, XM_021075858, XM_021075859	15:100733560-100820553:-1	post-GPI attachment to proteins 1	Cluster001
PGGT1B	64	ENSSSCG00000014215	ENSSSCT00000015533, ENSSSCT00000053180, XM_003123848	2:119386053-119440325:-1	protein geranylgeranyltransferase type I subunit beta	Cluster001
PGM2L1	545	ENSSSCG00000014838	ENSSSCT00000016190, ENSSSCT00000055213	9:8686976-8761709:-1	phosphoglucomutase 2 like 1	Cluster001
PHACTR3	380	ENSSSCG00000007528	ENSSSCT00000008258, ENSSSCT00000035421, ENSSSCT00000036671, XM_005673064	17:59628365-59863388:+1	phosphatase and actin regulator 3	Cluster001
PHAX	412	ENSSSCG00000014244	ENSSSCT00000015564, ENSSSCT00000041186, XM_005661605	2:129712882-129727090:+1	phosphorylated adaptor for RNA export	Cluster001
PHC3	38	ENSSSCG00000030467	ENSSSCT00000027451, ENSSSCT00000029926, ENSSSCT00000038072, ENSSSCT00000040331, ENSSSCT00000050971, ENSSSCT00000057064, ENSSSCT00000063470, XM_021069778, XM_021069779, XM_021069780, XM_021069781, XM_021069782, XM_021069783, XM_021069784, XM_021069785, XM_021069786, XM_021069787, XM_021069789	13:108795364-108913621:-1	polyhomeotic homolog 3	Cluster001
PHF14	743	ENSSSCG00000026722	ENSSSCT00000030889, ENSSSCT00000031171, ENSSSCT00000032105, ENSSSCT00000047756, XM_003130175, XM_005667644, XM_005667645, XM_013979727, XM_013979728, XM_013979729	9:80677560-80866156:+1	PHD finger protein 14	Cluster001
PHF20L1	706	ENSSSCG00000005950	ENSSSCT00000006533, ENSSSCT00000033933, ENSSSCT00000051386, ENSSSCT00000065912, XM_021088877, XM_021088878, XM_021088879, XM_021088880, XM_021088881, XM_021088882, XM_021088884, XM_021088885, XM_021088887, XM_021088888, XM_021088889, XM_021088890, XM_021088891, XM_021088892	4:8394953-8468265:-1	PHD finger protein 20-like 1	Cluster001
PHF3	787	ENSSSCG00000035259	ENSSSCT00000040949, ENSSSCT00000052268, XM_021089288, XM_021089294, XM_021089298, XM_021089302, XM_021089312	1:45219389-45296398:+1	PHD finger protein 3	Cluster001
PHF6	759	ENSSSCG00000022942	ENSSSCT00000029950, ENSSSCT00000035499, ENSSSCT00000050146, ENSSSCT00000058181, XM_021079381, XM_021079382, XM_021079383, XM_021079386	X:110248975-110303006:+1	PHD finger protein 6	Cluster001
PHIP	162	ENSSSCG00000004473	ENSSSCT00000004941, XM_021092177, XM_021092205, XM_021092207, XM_021092214	1:87117224-87242674:+1	pleckstrin homology domain interacting protein	Cluster001
PHKA2	120	ENSSSCG00000012157	ENSSSCT00000013298, ENSSSCT00000052343, ENSSSCT00000055314, XM_003134959, XM_013985959, XM_013985960, XM_013985961, XM_013985962, XM_013985963, XM_013985964, XM_021080649, XM_021080650, XM_021080651, XM_021080653	X:15281636-15365565:-1	phosphorylase kinase regulatory subunit alpha 2	Cluster001
PHYKPL	64	ENSSSCG00000014030	ENSSSCT00000015326, ENSSSCT00000041254, ENSSSCT00000043206, ENSSSCT00000043888, ENSSSCT00000052072, ENSSSCT00000055724, XM_021084358, XM_021084359, XM_021084360, XM_021084362	2:80141834-80191957:+1	5-phosphohydroxy-L-lysine phospho-lyase	Cluster001
PIAS1	105	ENSSSCG00000004958	ENSSSCT00000005470, ENSSSCT00000026593, XM_003121749	1:165853126-166087239:+1	protein inhibitor of activated STAT 1	Cluster001
PIBF1	341	ENSSSCG00000024722	ENSSSCT00000025113, ENSSSCT00000026633, ENSSSCT00000045708, ENSSSCT00000046867, ENSSSCT00000051035, XM_021065658, XM_021065659, XM_021065660, XM_021065661, XM_021065663, XM_021065664, XM_021065665	11:45076007-45362693:+1	progesterone immunomodulatory binding factor 1	Cluster001
PID1	436	ENSSSCG00000035058	ENSSSCT00000044983, ENSSSCT00000045855, ENSSSCT00000065198	15:130079132-130332716:-1	phosphotyrosine interaction domain containing 1	Cluster001
PIEZO2	189	.	XM_021096049	.	piezo type mechanosensitive ion channel component 2	Cluster001
PIGU	11	ENSSSCG00000007282	ENSSSCT00000007967, XM_021077222, XM_021077223	17:37942707-38081082:-1	phosphatidylinositol glycan anchor biosynthesis class U	Cluster001
PIGW	467	ENSSSCG00000035006	ENSSSCT00000050569, ENSSSCT00000054606, ENSSSCT00000061045, XM_021067316, XM_021067317, XM_021067318, XM_021067319, XM_021067320	12:38061955-38065708:+1	phosphatidylinositol glycan anchor biosynthesis class W	Cluster001
PIK3C2A	49	ENSSSCG00000025406	ENSSSCT00000024535, XM_021083275	2:41933429-42022209:+1	phosphatidylinositol-4-phosphate 3-kinase catalytic subunit type 2 alpha	Cluster001
PITPNB	346	.	XM_001927781, XM_005657336	.	phosphatidylinositol transfer protein beta	Cluster001
PJA1	11	ENSSSCG00000024463	ENSSSCT00000032049, ENSSSCT00000049199, XM_003360347, XM_005673702, XM_005673703, XM_005673704, XM_005673705	X:55238193-55280530:-1	praja ring finger ubiquitin ligase 1	Cluster001
PKHD1L1	80	ENSSSCG00000006025	ENSSSCT00000006612, ENSSSCT00000044930, XM_021089012	4:28024891-28176236:-1	PKHD1 like 1	Cluster001
PKIA	150	ENSSSCG00000006163	ENSSSCT00000006757	4:57872115-57897303:-1	cAMP-dependent protein kinase inhibitor alpha	Cluster001
PKN2	111	ENSSSCG00000006927	ENSSSCT00000007588, ENSSSCT00000045662, ENSSSCT00000063690, XM_013997432, XM_021090332, XM_021090333, XM_021090334, XM_021090335, XM_021090337, XM_021090338	4:127573740-127709942:-1	protein kinase N2	Cluster001
PLAA	231	ENSSSCG00000005126	ENSSSCT00000005651, ENSSSCT00000040732, ENSSSCT00000050700, XM_013986020, XM_021062716, XM_021062719	1:196176075-196219612:+1	phospholipase A2 activating protein	Cluster001
PLEKHA5	156	ENSSSCG00000000588	ENSSSCT00000000633, ENSSSCT00000037877, ENSSSCT00000041180, ENSSSCT00000046224, ENSSSCT00000055577, ENSSSCT00000056634, ENSSSCT00000059158, ENSSSCT00000060287, XM_021092259, XM_021092260, XM_021092262, XM_021092263, XM_021092266, XM_021092268, XM_021092269, XM_021092270, XM_021092271, XM_021092272, XM_021092273, XM_021092274, XM_021092275, XM_021092276, XM_021092278, XM_021092280, XM_021092282, X…	5:53760818-54016938:-1	pleckstrin homology domain containing A5	Cluster001
PLEKHA8	219	ENSSSCG00000016682	ENSSSCT00000018163, ENSSSCT00000060505, ENSSSCT00000061655, ENSSSCT00000065209, XM_013985757, XM_021079155, XM_021079156	18:42845609-42926059:-1	pleckstrin homology domain containing A8	Cluster001
PLPPR1	89	ENSSSCG00000005393	ENSSSCT00000005936, ENSSSCT00000047466, ENSSSCT00000049737, XM_013993715, XM_021066742, XM_021066751, XM_021066759, XM_021066769	1:242682263-243023018:+1	phospholipid phosphatase related 1	Cluster001
PLPPR3	377	ENSSSCG00000037432	ENSSSCT00000046977, ENSSSCT00000058842, XM_003353964	2:77538967-77555519:+1	phospholipid phosphatase related 3	Cluster001
PLXNA2	437	ENSSSCG00000026412	ENSSSCT00000029838, ENSSSCT00000045720, XM_021063894	9:134584201-134796211:+1	plexin A2	Cluster001
PLXNA4	144	ENSSSCG00000021562	ENSSSCT00000022545, ENSSSCT00000037897, ENSSSCT00000040479, ENSSSCT00000047186, ENSSSCT00000047876, ENSSSCT00000052184, ENSSSCT00000064268, XM_021078937, XM_021078938, XM_021078939, XM_021078940, XM_021078941	18:16807034-17001061:+1	plexin A4	Cluster001
PLXNC1	179	ENSSSCG00000000907	ENSSSCT00000000991, ENSSSCT00000036241, ENSSSCT00000055876, XM_021092759	5:88900245-89055742:-1	plexin C1	Cluster001
PMS2	1	ENSSSCG00000007590	ENSSSCT00000008330, XM_003124283, XM_021086081	3:5118018-5145628:+1	PMS1 homolog 2, mismatch repair system component	Cluster001
PNISR	286	ENSSSCG00000037594	ENSSSCT00000028650, ENSSSCT00000048318, ENSSSCT00000060237, XM_021079463, XM_021079851, XM_021080246, XM_021080749, XM_021081189	1:66321459-66381449:-1	PNN interacting serine and arginine rich protein	Cluster001
PNN	542	ENSSSCG00000022828	ENSSSCT00000022515, ENSSSCT00000038703, ENSSSCT00000055104	1:169722879-169734003:+1	pinin, desmosome associated protein	Cluster001
PNPT1	65	ENSSSCG00000031882	ENSSSCT00000055752, XM_021085800	3:85595305-85639660:+1	polyribonucleotide nucleotidyltransferase 1	Cluster001
POC5	16	ENSSSCG00000014084	ENSSSCT00000015385, ENSSSCT00000055601, XM_003123710, XM_005661493, XM_005661495, XM_013994911, XM_013994912	2:84690127-84730954:-1	POC5 centriolar protein	Cluster001
POGZ	403	ENSSSCG00000006622	ENSSSCT00000007256, ENSSSCT00000039407, ENSSSCT00000046893, ENSSSCT00000048783, ENSSSCT00000062951, XM_005663450, XM_005663451, XM_021089861	4:97776573-97833284:+1	pogo transposable element derived with ZNF domain	Cluster001
POLA1	117	ENSSSCG00000022240	ENSSSCT00000027046, ENSSSCT00000027952, ENSSSCT00000034075, ENSSSCT00000050139, XM_021080571, XM_021080572	X:20756201-21102061:+1	DNA polymerase alpha 1, catalytic subunit	Cluster001
POLD3	48	ENSSSCG00000027506	ENSSSCT00000024551	9:8906570-8956265:+1	DNA polymerase delta 3, accessory subunit	Cluster001
POLE3	336	ENSSSCG00000005478	ENSSSCT00000006024, ENSSSCT00000050903	1:254033383-254035978:-1	DNA polymerase epsilon 3, accessory subunit	Cluster001
POLH	4	ENSSSCG00000001683	ENSSSCT00000001879, ENSSSCT00000043330, ENSSSCT00000052882, ENSSSCT00000063506, XM_003356630, XM_005666042, XM_005666043, XM_013977964, XM_013977966, XM_021098756, XM_021098757, XM_021098758	7:38568994-38601793:+1	DNA polymerase eta	Cluster001
POLR3A	94	ENSSSCG00000010327	ENSSSCT00000011305, ENSSSCT00000046109, ENSSSCT00000047864, XM_001929360, XM_013983365	14:80410147-80471697:-1	RNA polymerase III subunit A	Cluster001
POLR3C	17	ENSSSCG00000006691	ENSSSCT00000007330, XM_021089946, XM_021089947	4:99472355-99494142:-1	RNA polymerase III subunit C	Cluster001
POLR3G	204	.	XM_003123778, XM_005652940	.	RNA polymerase III subunit G	Cluster001
POU2F1	210	ENSSSCG00000006310	ENSSSCT00000006917, ENSSSCT00000041850, ENSSSCT00000045260, ENSSSCT00000053018, ENSSSCT00000062507, XM_005663132, XM_005663133, XM_005663134, XM_005663135, XM_013996798	4:83596194-83777283:-1	POU class 2 homeobox 1	Cluster001
POU3F1	501	ENSSSCG00000003646	ENSSSCT00000004042	6:94026675-94028030:-1	POU class 3 homeobox 1	Cluster001
POU3F2	344	ENSSSCG00000004346	ENSSSCT00000004803, XM_001926241	1:65835519-65848875:+1	POU class 3 homeobox 2	Cluster001
POU3F3	299	ENSSSCG00000022096	ENSSSCT00000023713, XM_005662353	3:49800739-49807666:-1	POU class 3 homeobox 3	Cluster001
PPAN	28	ENSSSCG00000013662	ENSSSCT00000014926, ENSSSCT00000040370, ENSSSCT00000044076, ENSSSCT00000061481	2:68958905-68962657:+1	peter pan homolog	Cluster001
PPAT	354	ENSSSCG00000008902	ENSSSCT00000009746, ENSSSCT00000009749, XM_003482396	8:55650606-55730014:-1	phosphoribosyl pyrophosphate amidotransferase	Cluster001
PPCS	372	ENSSSCG00000003966	ENSSSCT00000004387, XM_013977376, XM_013977377, XM_013977378	6:168869698-168876826:-1	phosphopantothenoylcysteine synthetase	Cluster001
PPFIA1	68	ENSSSCG00000037451	ENSSSCT00000041903, ENSSSCT00000043630, ENSSSCT00000052752, ENSSSCT00000060920, ENSSSCT00000062269, XM_021082660, XM_021082661, XM_021082662, XM_021082664, XM_021082665, XM_021082666, XM_021082667, XM_021082668, XM_021082669	2:3072372-3165481:-1	PTPRF interacting protein alpha 1	Cluster001
PPIA	233	.	XM_013985800, XM_021078519	.	peptidylprolyl isomerase A	Cluster001
PPIG	630	ENSSSCG00000031123	ENSSSCT00000040557, ENSSSCT00000041210, ENSSSCT00000063636, ENSSSCT00000066047, ENSSSCT00000066167, XM_001926861, XM_005671916, XM_021076268, XM_021076269, XM_021076270, XM_021076271	15:75939737-75979166:+1	peptidylprolyl isomerase G	Cluster001
PPIP5K2	177	ENSSSCG00000024999	ENSSSCT00000023670, ENSSSCT00000031964, ENSSSCT00000047228, ENSSSCT00000048119, ENSSSCT00000052307, ENSSSCT00000052528, ENSSSCT00000055761, ENSSSCT00000057798, ENSSSCT00000060027, ENSSSCT00000064119, XM_013987579, XM_013987581, XM_021084570, XM_021084571, XM_021084572, XM_021084574, XM_021084575, XM_021084577, XM_021084578, XM_021084579, XM_021084580, XM_021084581, XM_021084582, XM_021084583, XM_…	2:108585999-108692404:+1	diphosphoinositol pentakisphosphate kinase 2	Cluster001
PPM1G	653	ENSSSCG00000027135	ENSSSCT00000023870, ENSSSCT00000056355, ENSSSCT00000063374, XM_005655254, XM_021087685	3:111747972-111774922:+1	protein phosphatase, Mg2+/Mn2+ dependent 1G	Cluster001
PPM1K	447	ENSSSCG00000038867	ENSSSCT00000043466, ENSSSCT00000051653, XM_021101766, XM_021101767	8:130748242-130772930:+1	protein phosphatase, Mg2+/Mn2+ dependent 1K	Cluster001
PPP1R12A	99	ENSSSCG00000038973	ENSSSCT00000050420, ENSSSCT00000057360, XM_021092811	5:101490207-101608398:+1	protein phosphatase 1 regulatory subunit 12A	Cluster001
PPP1R15B	60	ENSSSCG00000015282	ENSSSCT00000029335, XM_005656671, XM_005656672	9:65056390-65066928:-1	protein phosphatase 1 regulatory subunit 15B	Cluster001
PPP1R26	44	ENSSSCG00000005761	ENSSSCT00000006337, XM_005660545, XM_005660546	AEMK02000682.1:1926430-1934074:-1	protein phosphatase 1 regulatory subunit 26	Cluster001
PPP1R8	49	ENSSSCG00000021634	ENSSSCT00000030562, XM_021093434	6:84966746-84990682:+1	protein phosphatase 1 regulatory subunit 8	Cluster001
PPP2R2B	198	ENSSSCG00000028976	ENSSSCT00000029561, ENSSSCT00000040302, ENSSSCT00000057962, ENSSSCT00000062323, XM_021080828, XM_021080834, XM_021080843, XM_021080856, XM_021080860, XM_021080862, XM_021080870, XM_021080871, XM_021080876	2:147937442-148411731:-1	protein phosphatase 2 regulatory subunit Bbeta	Cluster001
PPP2R5E	761	ENSSSCG00000026382	ENSSSCT00000032151, ENSSSCT00000057247	1:194504962-194657743:+1	protein phosphatase 2 regulatory subunit B epsilon	Cluster001
PPP3CB	288	.	XM_001928015, XM_001928025, XM_005671106, XM_005671107, XM_005671108, XM_005671110, XM_021072574, XM_021072575, XM_021072576, XM_021072577, XM_021072578, XM_021072579, XM_021072580, XM_021072581, XM_021072583	.	protein phosphatase 3 catalytic subunit beta	Cluster001
PPP3CC	558	ENSSSCG00000032622	ENSSSCT00000010549, ENSSSCT00000010550, ENSSSCT00000033351, ENSSSCT00000040581, ENSSSCT00000057329, ENSSSCT00000059242, XM_001928163, XM_005657237, XM_005657238	14:6639461-6803650:+1	protein phosphatase 3 catalytic subunit gamma	Cluster001
PPP4R2	43	ENSSSCG00000037216	ENSSSCT00000055097, ENSSSCT00000056573, ENSSSCT00000057625	13:54324978-54378276:+1	protein phosphatase 4 regulatory subunit 2	Cluster001
PPP4R3A	488	ENSSSCG00000002441	ENSSSCT00000002711, ENSSSCT00000056021, XM_005666398, XM_005666399, XM_021099618, XM_021099619	7:113111303-113148986:-1	protein phosphatase 4 regulatory subunit 3A	Cluster001
PPP4R3B	371	ENSSSCG00000008398	ENSSSCT00000009195, ENSSSCT00000045674, ENSSSCT00000050802, ENSSSCT00000060710	3:85649855-85711107:+1	protein phosphatase 4 regulatory subunit 3B	Cluster001
PPP6R3	257	ENSSSCG00000012884	ENSSSCT00000014085, ENSSSCT00000040805, ENSSSCT00000050172, ENSSSCT00000052161, ENSSSCT00000055428, ENSSSCT00000061252, ENSSSCT00000063131, ENSSSCT00000063174, XM_021082693, XM_021082694, XM_021082695, XM_021082696, XM_021082697, XM_021082698, XM_021082699, XM_021082700, XM_021082701, XM_021082702, XM_021082703, XM_021082704, XM_021082705, XM_021082706, XM_021082707, XM_021082708, XM_021082709, X…	2:4394676-4523830:-1	protein phosphatase 6 regulatory subunit 3	Cluster001
PQBP1	519	ENSSSCG00000025264	ENSSSCT00000030898, ENSSSCT00000057389, XM_005673594	X:42975536-42981734:+1	polyglutamine binding protein 1	Cluster001
PRDM10	369	ENSSSCG00000015243	ENSSSCT00000016612, ENSSSCT00000037612, XM_013979567	9:56657272-56749476:-1	PR/SET domain 10	Cluster001
PRDM15	105	ENSSSCG00000012084	ENSSSCT00000013218, ENSSSCT00000059953, XM_021071010, XM_021071011, XM_021071012, XM_021071013, XM_021071015, XM_021071016, XM_021071017	13:205176752-205215503:-1	PR/SET domain 15	Cluster001
PRDM4	215	ENSSSCG00000000160	ENSSSCT00000000169, ENSSSCT00000027247, ENSSSCT00000047006, XM_005655523, XM_013988215, XM_021091553	5:12638291-12668879:+1	PR/SET domain 4	Cluster001
PRDM8	25	ENSSSCG00000036555	ENSSSCT00000039154, XM_021100795, XM_021100796	8:137603847-137612651:-1	PR/SET domain 8	Cluster001
PRELID3B	251	.	XM_013985516	.	PRELI domain containing 3B	Cluster001
PREP	139	ENSSSCG00000004368	ENSSSCT00000004829, ENSSSCT00000039770, ENSSSCT00000055168, XM_021083601	1:71493233-71701083:-1	prolyl endopeptidase	Cluster001
PRKAA1	12	ENSSSCG00000024598	ENSSSCT00000030818, ENSSSCT00000065700, XM_021076521, XM_021076522	16:25743603-25783610:-1	protein kinase AMP-activated catalytic subunit alpha 1	Cluster001
PRKAB2	15	ENSSSCG00000006703	ENSSSCT00000007342, ENSSSCT00000036163, ENSSSCT00000055118, ENSSSCT00000056624, XM_005653067	4:100378051-100394463:+1	protein kinase AMP-activated non-catalytic subunit beta 2	Cluster001
PRKAG2	263	ENSSSCG00000016432	ENSSSCT00000017893, ENSSSCT00000025093, ENSSSCT00000038803, ENSSSCT00000047240, ENSSSCT00000062215, XM_005654266, XM_021078611, XM_021078612, XM_021078613, XM_021078614, XM_021078615, XM_021078616, XM_021078617, XM_021078618, XM_021078619, XM_021078620, XM_021078621	18:5475410-5746613:+1	protein kinase AMP-activated non-catalytic subunit gamma 2	Cluster001
PRKAR2A	860	ENSSSCG00000011363	ENSSSCT00000012441, ENSSSCT00000049478, ENSSSCT00000065573	13:31426040-31517273:-1	protein kinase cAMP-dependent type II regulatory subunit alpha	Cluster001
PRKAR2B	605	ENSSSCG00000037706	ENSSSCT00000037125, ENSSSCT00000059105	9:106851125-106957515:+1	protein kinase cAMP-dependent type II regulatory subunit beta	Cluster001
PRKG1	378	ENSSSCG00000010429	ENSSSCT00000011414, ENSSSCT00000053831, XM_021072188	14:97558535-98793356:-1	protein kinase, cGMP-dependent, type I	Cluster001
PRKRA	32	ENSSSCG00000038254	ENSSSCT00000065566, XM_001927705	15:84130236-84156382:-1	protein activator of interferon induced protein kinase EIF2AK2	Cluster001
PRMT5	438	ENSSSCG00000030045	ENSSSCT00000027720, ENSSSCT00000037693, ENSSSCT00000038800, ENSSSCT00000043961, ENSSSCT00000064759, XM_005658950, XM_005658951	7:76110729-76124944:+1	protein arginine methyltransferase 5	Cluster001
PROM1	153	ENSSSCG00000008745	ENSSSCT00000009568, ENSSSCT00000035049, ENSSSCT00000040093, ENSSSCT00000051541, XM_013978534, XM_013978536, XM_013978537, XM_013978542, XM_013978543, XM_013978544, XM_013978545, XM_013978548, XM_021101023, XM_021101024, XM_021101026, XM_021101028, XM_021101029	8:11215554-11317942:-1	prominin 1	Cluster001
PRPF18	108	.	XM_021063991, XM_021063992, XM_021063993	.	pre-mRNA processing factor 18	Cluster001
PRPF31	58	ENSSSCG00000003263	ENSSSCT00000003624, ENSSSCT00000051359, ENSSSCT00000057147, XM_003127413	6:55991015-56011441:-1	pre-mRNA processing factor 31	Cluster001
PRPF38A	15	ENSSSCG00000028288	ENSSSCT00000029160	6:159797626-159825737:-1	pre-mRNA processing factor 38A	Cluster001
PRPF38B	442	.	XM_001927806	.	pre-mRNA processing factor 38B	Cluster001
PRPF39	544	ENSSSCG00000004997	ENSSSCT00000005511, ENSSSCT00000049494, ENSSSCT00000052409, ENSSSCT00000057685, ENSSSCT00000062711, ENSSSCT00000065682, XM_001927120, XM_005659929, XM_005659930, XM_021101255, XM_021101264	1:175285243-175317242:+1	pre-mRNA processing factor 39	Cluster001
PRPF4	193	ENSSSCG00000024648	ENSSSCT00000032454, XM_003353619, XM_005660339	1:253906525-253927899:+1	pre-mRNA processing factor 4	Cluster001
PRPF40A	342	ENSSSCG00000015867	ENSSSCT00000017278, ENSSSCT00000037304, ENSSSCT00000038990, ENSSSCT00000049118, ENSSSCT00000049460, ENSSSCT00000055453, ENSSSCT00000064185, ENSSSCT00000066344, XM_005671845, XM_013984127, XM_013984128, XM_013984129, XM_013984130, XM_013984132, XM_021074550, XM_021074551, XM_021074552, XM_021074553, XM_021074554	15:60386596-60440529:-1	pre-mRNA processing factor 40 homolog A	Cluster001
PRPF4B	147	ENSSSCG00000001002	ENSSSCT00000001094, ENSSSCT00000037466, ENSSSCT00000044423, ENSSSCT00000050699, ENSSSCT00000050974, ENSSSCT00000058729, ENSSSCT00000062077, ENSSSCT00000062632, ENSSSCT00000064811, XM_021100124, XM_021100126	7:2360481-2417083:+1	pre-mRNA processing factor 4B	Cluster001
PRR14L	49	ENSSSCG00000010033	ENSSSCT00000010990, ENSSSCT00000037841, ENSSSCT00000045627, ENSSSCT00000051499, ENSSSCT00000053318, ENSSSCT00000058673, ENSSSCT00000060188, XM_005670868, XM_005670869, XM_013983088, XM_021073914, XM_021073915	14:48351979-48418167:-1	proline rich 14 like	Cluster001
PRUNE1	526	ENSSSCG00000006641	ENSSSCT00000007277, ENSSSCT00000054336, XM_005663485, XM_013997183, XM_013997185, XM_013997186	4:98194139-98216932:-1	prune exopolyphosphatase 1	Cluster001
PSIP1	629	ENSSSCG00000005183	ENSSSCT00000005714, ENSSSCT00000058791, XM_005660092, XM_021102150, XM_021102208	1:207173514-207216438:+1	PC4 and SFRS1 interacting protein 1	Cluster001
PSMA3	121	ENSSSCG00000005072	ENSSSCT00000005589, XM_001927990	1:187343131-187372193:+1	proteasome subunit alpha 3	Cluster001
PSMA4	265	ENSSSCG00000036924	ENSSSCT00000065836, XM_021098292	7:47440588-47460879:-1	proteasome subunit alpha 4	Cluster001
PSMC6	125	ENSSSCG00000005038	ENSSSCT00000005554, ENSSSCT00000053879, ENSSSCT00000056381, XM_001928747	1:182318731-182357981:+1	proteasome 26S subunit, ATPase 6	Cluster001
PSMD13	260	ENSSSCG00000014559	ENSSSCT00000015909, ENSSSCT00000049587, XM_003124227	2:55108-70961:+1	proteasome 26S subunit, non-ATPase 13	Cluster001
PSMD14	265	ENSSSCG00000015892	ENSSSCT00000017304, ENSSSCT00000054285, ENSSSCT00000055299, XM_003359536	15:68107374-68210519:+1	proteasome 26S subunit, non-ATPase 14	Cluster001
PSMD5	42	ENSSSCG00000005507	ENSSSCT00000006057, ENSSSCT00000022255, XM_021068163	1:260846408-260868735:-1	proteasome 26S subunit, non-ATPase 5	Cluster001
PSPC1	73	ENSSSCG00000009569	ENSSSCT00000010490, ENSSSCT00000057535, XM_021065419, XM_021065421	11:507036-572090:-1	paraspeckle component 1	Cluster001
PTBP1	16	.	XM_005661413, XM_021081310, XM_021081318, XM_021081329, XM_021081338	.	polypyrimidine tract binding protein 1	Cluster001
PTBP2	265	ENSSSCG00000006879	ENSSSCT00000007533, ENSSSCT00000022271, ENSSSCT00000024275, XM_021090154, XM_021090155, XM_021090156, XM_021090157	4:120961381-121041911:-1	polypyrimidine tract binding protein 2	Cluster001
PTCHD4	299	ENSSSCG00000001729	ENSSSCT00000001933, XM_021098806, XM_021098807, XM_021098808, XM_021098809	7:42572971-42770559:-1	patched domain containing 4	Cluster001
PTEN	259	.	XM_021071996	.	phosphatase and tensin homolog	Cluster001
PTGES3	127	ENSSSCG00000000406	ENSSSCT00000000439, XM_005663892	5:22000340-22021662:-1	prostaglandin E synthase 3	Cluster001
PTGIS	204	ENSSSCG00000007463	ENSSSCT00000008167, XM_005654248	17:51153155-51200273:-1	prostaglandin I2 synthase	Cluster001
PTMS	213	.	XM_013987418	.	parathymosin	Cluster001
PTPN11	354	ENSSSCG00000030289	ENSSSCT00000030697, ENSSSCT00000040231, XM_013990361, XM_013990362, XM_013990364, XM_021073562, XM_021073563	14:39201332-39292103:-1	protein tyrosine phosphatase, non-receptor type 11	Cluster001
PTPN12	191	ENSSSCG00000015411	ENSSSCT00000016786, ENSSSCT00000038510, ENSSSCT00000043910, ENSSSCT00000047998, ENSSSCT00000064875, XM_021102554, XM_021102555, XM_021102556, XM_021102557	9:102480918-102564148:-1	protein tyrosine phosphatase, non-receptor type 12	Cluster001
PTPN2	489	.	XM_021096020, XM_021096021, XM_021096022, XM_021096023	.	protein tyrosine phosphatase, non-receptor type 2	Cluster001
PTPRA	247	ENSSSCG00000007166	ENSSSCT00000007839, ENSSSCT00000038766, ENSSSCT00000042650, ENSSSCT00000054908, XM_005672777	17:32633612-32797152:-1	protein tyrosine phosphatase, receptor type A	Cluster001
PTPRD	299	ENSSSCG00000005194	ENSSSCT00000005726, ENSSSCT00000005727, ENSSSCT00000029124, ENSSSCT00000041207, ENSSSCT00000052345, ENSSSCT00000064789, XM_021074296, XM_021074300, XM_021074310, XM_021074314, XM_021074319, XM_021074327, XM_021074337, XM_021074352, XM_021074361, XM_021074366, XM_021074373, XM_021074376	1:213483756-214011524:+1	protein tyrosine phosphatase, receptor type D	Cluster001
PTPRO	616	ENSSSCG00000000601	ENSSSCT00000000646, ENSSSCT00000025227, ENSSSCT00000027092, XM_003126453	5:57021178-57263930:-1	protein tyrosine phosphatase, receptor type O	Cluster001
PTPRS	122	ENSSSCG00000028612	ENSSSCT00000031816, ENSSSCT00000032503, XM_021084028	2:73622409-73679458:+1	protein tyrosine phosphatase, receptor type S	Cluster001
PUM1	431	ENSSSCG00000003591	ENSSSCT00000003986, ENSSSCT00000025839, ENSSSCT00000043104, ENSSSCT00000048874, ENSSSCT00000049915, ENSSSCT00000057746, ENSSSCT00000064370, XM_013999086, XM_021095734, XM_021095735, XM_021095736, XM_021095737, XM_021095738, XM_021095739, XM_021095740, XM_021095741, XM_021095742, XM_021095743, XM_021095744, XM_021095745, XM_021095746, XM_021095747, XM_021095749, XM_021095750, XM_021095751, XM_0210…	6:87547320-87687460:-1	pumilio RNA binding family member 1	Cluster001
PUM2	484	ENSSSCG00000008600	ENSSSCT00000009411, ENSSSCT00000037311, ENSSSCT00000037408, ENSSSCT00000043465, ENSSSCT00000045037, ENSSSCT00000045867, ENSSSCT00000050255, ENSSSCT00000050337, XM_003125374, XM_003481283, XM_005662719, XM_005662720, XM_013996319, XM_013996320, XM_013996322, XM_013996323, XM_013996324, XM_021087792, XM_021087793, XM_021087794, XM_021087795, XM_021087796, XM_021087797, XM_021087798, XM_021087800, X…	3:117857960-117965567:+1	pumilio RNA binding family member 2	Cluster001
PUM3	656	ENSSSCG00000005227	ENSSSCT00000005761, ENSSSCT00000038806, XM_001927669	1:218994151-219038510:+1	pumilio RNA binding family member 3	Cluster001
PURG	156	ENSSSCG00000038933	ENSSSCT00000037315, ENSSSCT00000037526, ENSSSCT00000050935, ENSSSCT00000063060, XM_003359494	15:54095053-54239387:+1	purine rich element binding protein G	Cluster001
PUS3	99	ENSSSCG00000015222	ENSSSCT00000012144, ENSSSCT00000016588, ENSSSCT00000042613, XM_005667485, XM_021102025, XM_021102026	9:53018446-53038874:-1	pseudouridylate synthase 3	Cluster001
PUS7	464	ENSSSCG00000015428	ENSSSCT00000016808, ENSSSCT00000028990, ENSSSCT00000041093, ENSSSCT00000045267, ENSSSCT00000052189, XM_021102593, XM_021102594	9:105325722-105445621:-1	pseudouridylate synthase 7 (putative)	Cluster001
PUS7L	131	ENSSSCG00000000800	ENSSSCT00000000867, ENSSSCT00000040277, ENSSSCT00000061131, ENSSSCT00000065568, XM_001924907, XM_013997955, XM_013997956, XM_013997957, XM_021092565, XM_021092566	5:74803484-74835140:-1	pseudouridylate synthase 7 like	Cluster001
PWP1	298	ENSSSCG00000000161	ENSSSCT00000000170, ENSSSCT00000054909, XM_003126076	5:12703304-12730726:-1	PWP1 homolog, endonuclein	Cluster001
PWWP2A	58	.	XM_005674533, XM_021076907, XM_021076908, XM_021076910, XM_021076911, XM_021076912, XM_021076913, XM_021076914	.	PWWP domain containing 2A	Cluster001
PYGO1	323	ENSSSCG00000004607	ENSSSCT00000005088, XM_005654441	1:116293344-116320256:+1	pygopus family PHD finger 1	Cluster001
QRICH1	395	ENSSSCG00000011373	ENSSSCT00000012451, ENSSSCT00000040844, ENSSSCT00000045530, ENSSSCT00000045794, ENSSSCT00000046048, ENSSSCT00000063513, XM_005669532, XM_021070646, XM_021070647, XM_021070649, XM_021070650	13:31658651-31714491:-1	glutamine rich 1	Cluster001
QSER1	556	ENSSSCG00000013314	ENSSSCT00000014540, ENSSSCT00000025799, ENSSSCT00000038039, ENSSSCT00000038902, ENSSSCT00000061207, XM_013994460, XM_021083211, XM_021083212, XM_021083213, XM_021083215	2:27955398-28043478:-1	glutamine and serine rich 1	Cluster001
R3HCC1L	21	ENSSSCG00000010531	ENSSSCT00000011521, ENSSSCT00000042068, ENSSSCT00000043687, ENSSSCT00000054712, ENSSSCT00000055184, XM_001929141, XM_005671376, XM_021074445, XM_021074446	14:109484152-109569340:+1	R3H domain and coiled-coil containing 1 like	Cluster001
R3HDM2	102	.	XM_021091832, XM_021091833, XM_021091834, XM_021091835, XM_021091836, XM_021091837, XM_021091838, XM_021091839, XM_021091840, XM_021091841, XM_021091843, XM_021091844, XM_021091845, XM_021091846, XM_021091847, XM_021091848, XM_021091849, XM_021091850, XM_021091851, XM_021091852, XM_021091854, XM_021091855, XM_021091856, XM_021091857, XM_021091858, XM_021091859	.	R3H domain containing 2	Cluster001
RAB10	431	ENSSSCG00000008573	ENSSSCT00000009379	3:112841701-112924314:-1	RAB10, member RAS oncogene family	Cluster001
RAB11A	282	ENSSSCG00000032312	ENSSSCT00000060675, ENSSSCT00000064333	1:163858136-163894032:+1	RAB11A, member RAS oncogene family	Cluster001
RAB15	408	ENSSSCG00000002280	ENSSSCT00000002538, ENSSSCT00000046513, XM_021099383, XM_021099384	7:89016475-89039980:-1	RAB15, member RAS oncogene family	Cluster001
RAB18	532	ENSSSCG00000028655	ENSSSCT00000024844, XM_003357752, XM_021064710	10:38970428-39004972:+1	RAB18, member RAS oncogene family	Cluster001
RAB1A	718	ENSSSCG00000008359	ENSSSCT00000009153, ENSSSCT00000031971, ENSSSCT00000059098	3:76837309-76870202:+1	RAB1A, member RAS oncogene family	Cluster001
RAB21	282	ENSSSCG00000032468	ENSSSCT00000056108, XM_003481659	5:35757278-35790377:+1	RAB21, member RAS oncogene family	Cluster001
RAB25	201	ENSSSCG00000039186	ENSSSCT00000037225, XM_001928357	4:93957808-93970463:-1	RAB25, member RAS oncogene family	Cluster001
RAB2A	691	ENSSSCG00000006232	ENSSSCT00000006829, ENSSSCT00000038999, XM_001926704	4:72800573-72882208:-1	RAB2A, member RAS oncogene family	Cluster001
RAB31	8	ENSSSCG00000037264	ENSSSCT00000060216, XM_021096057	6:98278648-98385862:-1	RAB31, member RAS oncogene family	Cluster001
RAB39B	8	ENSSSCG00000024233	ENSSSCT00000022617, XM_003135517	X:125520497-125527400:-1	RAB39B, member RAS oncogene family	Cluster001
RAB3IP	156	.	XM_013997721, XM_021091977, XM_021091978, XM_021091979, XM_021091980, XM_021091981, XM_021091982, XM_021091983, XM_021091984	.	RAB3A interacting protein	Cluster001
RAB4A	346	ENSSSCG00000036039	ENSSSCT00000045441, ENSSSCT00000052258, XM_001925483, XM_005670985, XM_013983240, XM_021074412, XM_021074413	14:60480291-60528835:-1	RAB4A, member RAS oncogene family	Cluster001
RAB8B	649	ENSSSCG00000026571	ENSSSCT00000026677, ENSSSCT00000052686, ENSSSCT00000056693, ENSSSCT00000061279, XM_001929029	1:108764304-108840218:-1	RAB8B, member RAS oncogene family	Cluster001
RABEP1	749	ENSSSCG00000017895	ENSSSCT00000019473, ENSSSCT00000030882, ENSSSCT00000041362, ENSSSCT00000048478, ENSSSCT00000048601, ENSSSCT00000049886, ENSSSCT00000058092, ENSSSCT00000065004, XM_003358232, XM_021067730, XM_021067732, XM_021067733, XM_021067734, XM_021067735, XM_021067736, XM_021067737, XM_021067739	12:51602144-51867111:-1	rabaptin, RAB GTPase binding effector protein 1	Cluster001
RABGAP1	286	ENSSSCG00000020743	ENSSSCT00000023452, ENSSSCT00000024937, ENSSSCT00000025490, ENSSSCT00000064053, XM_021074563, XM_021074567, XM_021074570, XM_021074574, XM_021074580, XM_021074586, XM_021074593, XM_021074599	1:263847015-264030582:+1	RAB GTPase activating protein 1	Cluster001
RACK1	162	ENSSSCG00000029724	ENSSSCT00000022602, ENSSSCT00000052824	2:57279857-57284849:+1	receptor for activated C kinase 1	Cluster001
RAD21	198	ENSSSCG00000006014	ENSSSCT00000006600, ENSSSCT00000006601, ENSSSCT00000033947, XM_005662889	4:21720896-21803380:+1	RAD21 cohesin complex component	Cluster001
RAD23B	725	.	XM_001927866	.	RAD23 homolog B, nucleotide excision repair protein	Cluster001
RAD51C	264	ENSSSCG00000023955	ENSSSCT00000023145, XM_003131660, XM_005668974, XM_013981102, XM_021067279, XM_021067280, XM_021067281	12:34975979-35019019:+1	RAD51 paralog C	Cluster001
RAD54L2	61	ENSSSCG00000011425	ENSSSCT00000012502, ENSSSCT00000012505, XM_021068850, XM_021068851, XM_021068853, XM_021068854	13:33771318-33885661:+1	RAD54-like 2 (S. cerevisiae)	Cluster001
RAF1	305	ENSSSCG00000024453	ENSSSCT00000030744, ENSSSCT00000031449, ENSSSCT00000041784, XM_021069347, XM_021069349, XM_021069350, XM_021069351, XM_021069352	13:68581131-68657911:-1	Raf-1 proto-oncogene, serine/threonine kinase	Cluster001
RAI14	410	ENSSSCG00000016824	ENSSSCT00000018317	16:20373752-20434125:+1	retinoic acid induced 14	Cluster001
RALA	439	ENSSSCG00000029741	ENSSSCT00000024299, ENSSSCT00000051200, XM_013985841, XM_021079218, XM_021079219	18:54546720-54630061:-1	RAS like proto-oncogene A	Cluster001
RALB	87	ENSSSCG00000025455	ENSSSCT00000031440, ENSSSCT00000053997, XM_003359447, XM_003359448, XM_005654173, XM_005654174, XM_021074753, XM_021074754, XM_021074755, XM_021074756, XM_021074757	15:31064172-31114456:-1	RAS like proto-oncogene B	Cluster001
RALGPS2	675	ENSSSCG00000015523	ENSSSCT00000016910, ENSSSCT00000038783, XM_021063728, XM_021063729, XM_021063730	9:120562409-120724218:+1	Ral GEF with PH domain and SH3 binding motif 2	Cluster001
RALY	156	ENSSSCG00000007275	ENSSSCT00000007960, ENSSSCT00000043976, ENSSSCT00000045140, ENSSSCT00000046368, ENSSSCT00000050590, ENSSSCT00000051775, ENSSSCT00000059666, XM_001929104, XM_003134403, XM_005672865, XM_005672868, XM_013985298, XM_013985301, XM_021077799, XM_021077800, XM_021077801, XM_021077802, XM_021077803, XM_021077804, XM_021077805, XM_021077807, XM_021077808, XM_021077809, XM_021077811, XM_021077814	17:37447383-37542464:+1	RALY heterogeneous nuclear ribonucleoprotein	Cluster001
RALYL	186	.	XM_013996648, XM_021090619, XM_021090620, XM_021090621, XM_021090622, XM_021090623, XM_021090624, XM_021090625, XM_021090626, XM_021090627, XM_021090628, XM_021090629, XM_021090630, XM_021090631, XM_021090632, XM_021090633, XM_021090634, XM_021090635	.	RALY RNA binding protein-like	Cluster001
RANBP6	254	ENSSSCG00000005204	ENSSSCT00000005736, XM_005660115, XM_005660116, XM_021063932	1:216107594-216112386:+1	RAN binding protein 6	Cluster001
RAP1B	151	ENSSSCG00000032595	ENSSSCT00000040637, ENSSSCT00000047947, ENSSSCT00000065622, XM_005663969, XM_013997710	5:32910170-32963060:+1	RAP1B, member of RAS oncogene family	Cluster001
RAPGEF6	74	.	XM_005661629, XM_021085403, XM_021085404, XM_021085405, XM_021085407, XM_021085408, XM_021085409, XM_021085410, XM_021085411, XM_021085412, XM_021085413	.	Rap guanine nucleotide exchange factor 6	Cluster001
RASA1	662	ENSSSCG00000014146	ENSSSCT00000015450, ENSSSCT00000056952, XM_003354207, XM_005661545, XM_021084515	2:94879210-94994624:+1	RAS p21 protein activator 1	Cluster001
RASA2	410	ENSSSCG00000011672	ENSSSCT00000012777, ENSSSCT00000053735, XM_021069542, XM_021069543, XM_021069544, XM_021069545	13:82230118-82352756:+1	RAS p21 protein activator 2	Cluster001
RASIP1	226	ENSSSCG00000029151	ENSSSCT00000023329, ENSSSCT00000042201, XM_003127281	6:54058964-54072061:-1	Ras interacting protein 1	Cluster001
RASL11B	1	ENSSSCG00000008835	ENSSSCT00000009671, XM_003128970	8:39703362-39709817:+1	RAS like family 11 member B	Cluster001
RB1	285	ENSSSCG00000009401	ENSSSCT00000010300, ENSSSCT00000039213, XM_013992198	11:19186760-19317688:-1	RB transcriptional corepressor 1	Cluster001
RB1CC1	584	ENSSSCG00000028902	ENSSSCT00000026198, ENSSSCT00000045505, ENSSSCT00000055677, ENSSSCT00000064633, XM_021089370, XM_021089371, XM_021089372, XM_021089373, XM_021089374, XM_021089375	4:77593839-77649550:+1	RB1 inducible coiled-coil 1	Cluster001
RBAK	59	ENSSSCG00000008668	ENSSSCT00000009485, XM_005653058, XM_021086052	3:4422475-4439939:-1	RB associated KRAB zinc finger	Cluster001
RBBP6	85	ENSSSCG00000007830	ENSSSCT00000008580, ENSSSCT00000051079, ENSSSCT00000061233, XM_003124540, XM_005662074, XM_021081346, XM_021081347, XM_021081348, XM_021081349	AEMK02000510.1:847812-880870:-1	RB binding protein 6, ubiquitin ligase	Cluster001
RBBP7	294	ENSSSCG00000012149	ENSSSCT00000013288, ENSSSCT00000024779, XM_003134956, XM_003360236, XM_005673458, XM_005673459	X:13291457-13317146:-1	RB binding protein 7, chromatin remodeling factor	Cluster001
RBBP8	119	.	XM_003356374, XM_005665308, XM_005665309, XM_005665310, XM_021097735, XM_021097736, XM_021097737, XM_021097738, XM_021097739, XM_021097740, XM_021097741, XM_021097742	.	RB binding protein 8, endonuclease	Cluster001
RBFOX2	572	ENSSSCG00000000152	ENSSSCT00000000160, ENSSSCT00000037284, ENSSSCT00000044408, ENSSSCT00000044484, ENSSSCT00000044711, ENSSSCT00000045134, ENSSSCT00000047994, ENSSSCT00000052275, ENSSSCT00000053162, ENSSSCT00000054319, XM_005663829, XM_005663831, XM_005663834, XM_021090996, XM_021090997, XM_021090998, XM_021090999, XM_021091000, XM_021091001, XM_021091002, XM_021091003, XM_021091004, XM_021091005, XM_021091006, XM_…	5:11633546-11905324:+1	RNA binding protein, fox-1 homolog 2	Cluster001
RBM12	263	ENSSSCG00000036156	ENSSSCT00000028045, XM_003483946, XM_005672896, XM_013985324, XM_013985325, XM_021078266	17:38982708-38997242:-1	RNA binding motif protein 12	Cluster001
RBM15B	236	ENSSSCG00000011420	ENSSSCT00000012500	13:33664472-33667153:+1	RNA binding motif protein 15B	Cluster001
RBM25	605	ENSSSCG00000039876	ENSSSCT00000057405, XM_005666339	7:96406662-96455234:+1	RNA binding motif protein 25	Cluster001
RBM26	420	ENSSSCG00000009479	ENSSSCT00000010394, ENSSSCT00000028357, ENSSSCT00000050901, ENSSSCT00000061236, ENSSSCT00000064925, XM_001925971, XM_005668487, XM_013980595, XM_013980596, XM_013980597, XM_013980598, XM_013980599, XM_013980600, XM_013980606, XM_013980607, XM_013980609, XM_013980610, XM_013980611, XM_013980612, XM_021065770, XM_021065771, XM_021065772, XM_021065773, XM_021065774, XM_021065775, XM_021065776, XM_02…	11:51340630-51420865:-1	RNA binding motif protein 26	Cluster001
RBM27	242	.	XM_003124070	.	RNA binding motif protein 27	Cluster001
RBM3	439	.	XM_005657795, XM_005657796, XM_005657797	.	RNA binding motif (RNP1, RRM) protein 3	Cluster001
RBM34	32	.	XM_005670960, XM_021074093	.	RNA binding motif protein 34	Cluster001
RBM39	338	ENSSSCG00000007309	ENSSSCT00000007997, ENSSSCT00000048381, ENSSSCT00000055064, ENSSSCT00000055143, ENSSSCT00000060269, ENSSSCT00000061882, XM_003359964, XM_003359965, XM_005672897, XM_005672898, XM_013985327, XM_021078267, XM_021078268, XM_021078269, XM_021078270, XM_021078271, XM_021078272, XM_021078273, XM_021078274, XM_021078275, XM_021078276, XM_021078278, XM_021078279, XM_021078280, XM_021078281, XM_021078282,…	17:39029018-39064908:-1	RNA binding motif protein 39	Cluster001
RBM4	328	ENSSSCG00000032437	ENSSSCT00000014143, ENSSSCT00000053655, ENSSSCT00000059106, ENSSSCT00000062687, XM_021076813, XM_021076816, XM_021076819	2:5776542-5800760:-1	RNA binding motif protein 4	Cluster001
RBM41	134	ENSSSCG00000012556	ENSSSCT00000013728, ENSSSCT00000036760, ENSSSCT00000046582, XM_003135295, XM_013983724	X:87512550-87575086:-1	RNA binding motif protein 41	Cluster001
RBM5	523	ENSSSCG00000011395	ENSSSCT00000012473, ENSSSCT00000057016, XM_005669588	13:32579775-32612713:+1	RNA binding motif protein 5	Cluster001
RBMX	289	.	XM_013986455, XM_021079411, XM_021079412	.	RNA binding motif protein, X-linked	Cluster001
RBMXL1	157	ENSSSCG00000012703	ENSSSCT00000013889, ENSSSCT00000034598, ENSSSCT00000035101, ENSSSCT00000035747	X:111962632-111974472:-1	RNA binding motif protein X-linked	Cluster001
RBPJ	16	ENSSSCG00000022155	ENSSSCT00000023054, ENSSSCT00000038081, ENSSSCT00000038237, ENSSSCT00000044877, ENSSSCT00000056023, ENSSSCT00000060917, XM_003356883, XM_003356884, XM_005666567	8:19932466-20166754:+1	recombination signal binding protein for immunoglobulin kappa J region	Cluster001
RC3H1	142	ENSSSCG00000015498	ENSSSCT00000016884, ENSSSCT00000041796, ENSSSCT00000054568, XM_003357546, XM_013989616	9:116208794-116293915:-1	ring finger and CCCH-type domains 1	Cluster001
RC3H2	535	ENSSSCG00000005575	ENSSSCT00000006128, ENSSSCT00000060389, XM_013993836, XM_013993837, XM_021068506	1:263772173-263821948:-1	ring finger and CCCH-type domains 2	Cluster001
RCAN1	17	ENSSSCG00000012050	ENSSSCT00000013182, ENSSSCT00000042623, XM_005657146	13:198106257-198205629:-1	regulator of calcineurin 1	Cluster001
RCOR3	30	ENSSSCG00000028293	ENSSSCT00000026117, ENSSSCT00000040028, ENSSSCT00000047312, ENSSSCT00000050585, ENSSSCT00000061679, XM_021063868, XM_021063869, XM_021063870, XM_021063872, XM_021063873, XM_021063874, XM_021063875	9:131833346-131890819:-1	REST corepressor 3	Cluster001
RDX	106	ENSSSCG00000015013	ENSSSCT00000016377, ENSSSCT00000037354, ENSSSCT00000038469, ENSSSCT00000043039, ENSSSCT00000047031, ENSSSCT00000049402, ENSSSCT00000058502, ENSSSCT00000062654	9:38220247-38339033:-1	radixin	Cluster001
RECQL	618	ENSSSCG00000000580	ENSSSCT00000000624, ENSSSCT00000036882, ENSSSCT00000059872, XM_021091092	5:51953184-51997113:+1	RecQ like helicase	Cluster001
REEP1	424	ENSSSCG00000023710	ENSSSCT00000029906, ENSSSCT00000038490, ENSSSCT00000044678, ENSSSCT00000058685, ENSSSCT00000065039, XM_013995986, XM_021087288, XM_021087289, XM_021087290, XM_021087291	3:58435510-58558934:+1	receptor accessory protein 1	Cluster001
RELN	82	ENSSSCG00000015426	ENSSSCT00000016805, XM_021063495	9:103461885-103963684:-1	reelin	Cluster001
RESF1	34	ENSSSCG00000030616	ENSSSCT00000032100, ENSSSCT00000047538, ENSSSCT00000050134	5:42263402-42299543:-1	retroelement silencing factor 1	Cluster001
REV1	539	ENSSSCG00000008179	ENSSSCT00000008955, ENSSSCT00000008956, ENSSSCT00000008958, ENSSSCT00000041618, ENSSSCT00000047506, ENSSSCT00000057483, ENSSSCT00000060593, ENSSSCT00000064001, ENSSSCT00000064015, XM_021087178, XM_021087179, XM_021087181, XM_021087182, XM_021087183, XM_021087184, XM_021087185, XM_021087186, XM_021087187, XM_021087188, XM_021087189, XM_021087191	3:54135540-54863106:+1	REV1, DNA directed polymerase	Cluster001
REV3L	761	ENSSSCG00000025703	ENSSSCT00000004881, ENSSSCT00000026193, ENSSSCT00000042003, ENSSSCT00000046763, ENSSSCT00000061586, XM_021091238, XM_021091250	1:77195253-77401051:-1	REV3 like, DNA directed polymerase zeta catalytic subunit	Cluster001
RFC1	195	ENSSSCG00000008788	ENSSSCT00000009614, ENSSSCT00000040698, ENSSSCT00000061707, ENSSSCT00000063047, XM_005666588, XM_005666589, XM_013978598, XM_021101113	8:30552948-30635896:-1	replication factor C subunit 1	Cluster001
RFLNA	1	ENSSSCG00000035760	ENSSSCT00000060787, XM_001926661, XM_005670568, XM_013982774, XM_021072253	14:28824828-28840487:-1	refilin A	Cluster001
RFX3	88	ENSSSCG00000005225	ENSSSCT00000005759, ENSSSCT00000022279, ENSSSCT00000057324, XM_003480524, XM_021064195, XM_021064203, XM_021064212, XM_021064220, XM_021064230	1:218339772-218640605:+1	regulatory factor X3	Cluster001
RFX7	333	ENSSSCG00000004603	ENSSSCT00000005084, ENSSSCT00000040161, ENSSSCT00000056523, XM_021094829, XM_021094830, XM_021094836, XM_021094860	1:115734358-115871092:+1	regulatory factor X7	Cluster001
RGS17	110	ENSSSCG00000004075	ENSSSCT00000004504, XM_003353179, XM_021086637, XM_021086647	1:13340248-13442039:+1	regulator of G protein signaling 17	Cluster001
RHEBL1	13	ENSSSCG00000000186	ENSSSCT00000000197, XM_003126102, XM_021091594	5:15093609-15097764:-1	Ras homolog enriched in brain like 1	Cluster001
RHOBTB1	180	ENSSSCG00000028327	ENSSSCT00000011181, ENSSSCT00000026831, ENSSSCT00000038731, ENSSSCT00000044589, ENSSSCT00000058157, XM_021073597, XM_021073598, XM_021073599, XM_021073600	14:64326461-64465282:-1	Rho related BTB domain containing 1	Cluster001
RHOT1	487	ENSSSCG00000017735	ENSSSCT00000019302, ENSSSCT00000036939, ENSSSCT00000045634, ENSSSCT00000052850, ENSSSCT00000056201, XM_003131742, XM_005656986, XM_013989959	12:42711234-42783421:-1	ras homolog family member T1	Cluster001
RIF1	34	ENSSSCG00000016395	ENSSSCT00000017851, ENSSSCT00000055870, XM_003359717, XM_013990617, XM_021076097	15:774191-832010:-1	replication timing regulatory factor 1	Cluster001
RIMKLB	624	ENSSSCG00000000665	ENSSSCT00000000721, ENSSSCT00000046719, ENSSSCT00000059929, XM_003126510, XM_013988399, XM_013988400, XM_021092381, XM_021092382, XM_021092383, XM_021092384	5:62676952-62723919:-1	ribosomal modification protein rimK like family member B	Cluster001
RIMS4	92	ENSSSCG00000021453	ENSSSCT00000029508, XM_021077796	17:47171612-47235252:-1	regulating synaptic membrane exocytosis 4	Cluster001
RINT1	108	ENSSSCG00000015430	ENSSSCT00000016810, ENSSSCT00000025616, XM_021063501, XM_021063502	9:105392864-105430192:+1	RAD50 interactor 1	Cluster001
RIOK1	308	ENSSSCG00000001024	ENSSSCT00000001117, ENSSSCT00000047114, XM_021098127	7:4750487-4782448:+1	RIO kinase 1	Cluster001
RIOK3	58	ENSSSCG00000029518	ENSSSCT00000028729, ENSSSCT00000042310, ENSSSCT00000051526, ENSSSCT00000064771, ENSSSCT00000065029	6:108339007-108364093:+1	RIO kinase 3	Cluster001
RLF	617	ENSSSCG00000003670	ENSSSCT00000004066, ENSSSCT00000045163, ENSSSCT00000046706, XM_021096011	6:95900086-95994043:+1	rearranged L-myc fusion	Cluster001
RLIM	147	ENSSSCG00000028538	ENSSSCT00000013579, ENSSSCT00000030994, ENSSSCT00000060205, ENSSSCT00000065811, XM_003135188, XM_003360370, XM_021080456	X:59890207-59920493:-1	ring finger protein, LIM domain interacting	Cluster001
RMND5A	58	ENSSSCG00000035478	ENSSSCT00000037359, ENSSSCT00000046502, XM_021087279	3:58038031-58096720:-1	required for meiotic nuclear division 5 homolog A	Cluster001
RNF111	48	ENSSSCG00000004589	ENSSSCT00000005070, ENSSSCT00000038790, ENSSSCT00000042854, ENSSSCT00000047283, XM_013992922, XM_013992923, XM_013992924, XM_013992925, XM_013992927, XM_021073547, XM_021073569, XM_021073571	1:112961417-113059713:-1	ring finger protein 111	Cluster001
RNF139	171	ENSSSCG00000024412	ENSSSCT00000027560, ENSSSCT00000030960, XM_001927531	4:15154332-15196922:-1	ring finger protein 139	Cluster001
RNF168	571	.	XM_021070157, XM_021070158, XM_021070159, XM_021070160	.	ring finger protein 168	Cluster001
RNF180	188	ENSSSCG00000016941	ENSSSCT00000018449, ENSSSCT00000042909, XM_013984809, XM_013984810, XM_021077091, XM_021077092	16:42686965-42952053:+1	ring finger protein 180	Cluster001
RNF19A	567	ENSSSCG00000006066	ENSSSCT00000006656, ENSSSCT00000041893, ENSSSCT00000042277, ENSSSCT00000047504, XM_013996573	4:36654208-36726969:+1	ring finger protein 19A, RBR E3 ubiquitin protein ligase	Cluster001
RNF19B	459	ENSSSCG00000025206	ENSSSCT00000027475, ENSSSCT00000039852, ENSSSCT00000052109, ENSSSCT00000056449, XM_005665197, XM_013999132, XM_021095837, XM_021095839, XM_021095840, XM_021095841	6:89224379-89257057:-1	ring finger protein 19B	Cluster001
RNF2	833	ENSSSCG00000015568	ENSSSCT00000016959, ENSSSCT00000042424, ENSSSCT00000043301, ENSSSCT00000049209, ENSSSCT00000051776, ENSSSCT00000060674, ENSSSCT00000061196, ENSSSCT00000063272, XM_003130379, XM_005667821, XM_005667825, XM_013979932, XM_021102630, XM_021102631, XM_021102632, XM_021102633, XM_021102634, XM_021102635	9:126224251-126285201:+1	ring finger protein 2	Cluster001
RNF20	336	ENSSSCG00000005399	ENSSSCT00000005942, ENSSSCT00000024274, XM_001926594	1:243225719-243254557:+1	ring finger protein 20	Cluster001
RNF214	142	ENSSSCG00000015077	ENSSSCT00000016443, ENSSSCT00000053444, ENSSSCT00000066069, XM_003357311, XM_005667387, XM_021062882, XM_021062883	9:44596983-44640363:+1	ring finger protein 214	Cluster001
RNF219	742	ENSSSCG00000029113	ENSSSCT00000031188, ENSSSCT00000045220, ENSSSCT00000051817, ENSSSCT00000059820, ENSSSCT00000065608, XM_003131038, XM_021065768, XM_021065769	11:50741629-50786853:-1	ring finger protein 219	Cluster001
RNF34	8	ENSSSCG00000037811	ENSSSCT00000052550, ENSSSCT00000063816, ENSSSCT00000064967, XM_021073434	14:31202029-31229484:-1	ring finger protein 34	Cluster001
RNF38	535	ENSSSCG00000005343	ENSSSCT00000005882, ENSSSCT00000042166, ENSSSCT00000042863, ENSSSCT00000044797, ENSSSCT00000045128, XM_005660239, XM_005660242, XM_005660245, XM_013993656, XM_013993657, XM_013993658, XM_013993659, XM_013993662, XM_013993663, XM_021066052	1:237111008-237240348:-1	ring finger protein 38	Cluster001
RNF4	117	ENSSSCG00000008690	ENSSSCT00000009507, ENSSSCT00000063499, XM_005666483, XM_021100516	8:1353188-1380637:+1	ring finger protein 4	Cluster001
RNF41	376	ENSSSCG00000000383	ENSSSCT00000000411, ENSSSCT00000045000, ENSSSCT00000047640, XM_003481616, XM_013988306	5:21596306-21624569:-1	ring finger protein 41	Cluster001
RNGTT	98	ENSSSCG00000004311	ENSSSCT00000004766, ENSSSCT00000053939, ENSSSCT00000058496	1:56852866-57062070:-1	RNA guanylyltransferase and 5 -phosphatase	Cluster001
RNPC3	23	ENSSSCG00000037254	ENSSSCT00000026127, ENSSSCT00000031651, ENSSSCT00000031693, ENSSSCT00000057343, XM_005663629, XM_005663631, XM_013997339	4:115243183-115311972:-1	RNA binding region (RNP1, RRM) containing 3	Cluster001
RO60	160	ENSSSCG00000032055	ENSSSCT00000052320, ENSSSCT00000063834	10:694350-725346:-1	Ro60, Y RNA binding protein	Cluster001
ROBO1	318	ENSSSCG00000012001	ENSSSCT00000013132, ENSSSCT00000040237, ENSSSCT00000044836, ENSSSCT00000053075, ENSSSCT00000058634, XM_003132736, XM_013982517, XM_013982518, XM_013982520, XM_021071368, XM_021071369, XM_021071370, XM_021071371, XM_021071372, XM_021071373, XM_021071374, XM_021071376, XM_021071377, XM_021071378, XM_021071379	13:175980910-176479481:+1	roundabout guidance receptor 1	Cluster001
ROBO2	584	ENSSSCG00000012002	ENSSSCT00000013133, ENSSSCT00000027034, ENSSSCT00000060876, ENSSSCT00000062733, XM_021071383, XM_021071385, XM_021071386, XM_021071387, XM_021071388, XM_021071389, XM_021071390, XM_021071391, XM_021071392, XM_021071393, XM_021071394, XM_021071395, XM_021071396, XM_021071397, XM_021071400, XM_021071401, XM_021071402, XM_021071403, XM_021071404, XM_021071405, XM_021071406, XM_021071407, XM_021071408	13:177369577-177723151:-1	roundabout guidance receptor 2	Cluster001
RPAP3	138	ENSSSCG00000021166	ENSSSCT00000031434, ENSSSCT00000037959, ENSSSCT00000048755, ENSSSCT00000062773, ENSSSCT00000066033, XM_021092586, XM_021092587, XM_021092588, XM_021092589, XM_021092590, XM_021092591, XM_021092593	5:77969308-78066390:-1	RNA polymerase II associated protein 3	Cluster001
RPF2	318	ENSSSCG00000004394	ENSSSCT00000004857, ENSSSCT00000043824, XM_021091220, XM_021091229, XM_021091234	1:76917171-76960111:+1	ribosome production factor 2 homolog	Cluster001
RPGRIP1L	567	ENSSSCG00000031652	ENSSSCT00000041010, ENSSSCT00000049653, ENSSSCT00000063894, XM_021097099, XM_021097100, XM_021097101, XM_021097102	6:31564986-31661190:+1	RPGRIP1 like	Cluster001
RPL11	148	ENSSSCG00000024260	ENSSSCT00000022802	6:81522760-81526880:+1	ribosomal protein L11	Cluster001
RPL37	132	ENSSSCG00000033326	ENSSSCT00000047002	16:25799554-25803548:-1	ribosomal protein L37	Cluster001
RPL7L1	88	ENSSSCG00000026472	ENSSSCT00000027250	7:37940549-37950049:+1	ribosomal protein L7 like 1	Cluster001
RPP21	92	ENSSSCG00000021130	ENSSSCT00000024537, XM_005653456	7:23064366-23066287:+1	ribonuclease P/MRP subunit p21	Cluster001
RPRM	1	ENSSSCG00000037225	ENSSSCT00000059351	15:61141556-61141885:-1	reprimo, TP53 dependent G2 arrest mediator homolog	Cluster001
RPS15A	637	.	XM_021086553, XM_021086554	.	ribosomal protein S15a	Cluster001
RPS5	214	ENSSSCG00000004002	ENSSSCT00000004425, ENSSSCT00000039887, ENSSSCT00000053661, XM_003128133	6:62967994-62975687:+1	ribosomal protein S5	Cluster001
RPS6KB1	203	.	XM_003131671, XM_021067293, XM_021067294	.	ribosomal protein S6 kinase B1	Cluster001
RPS6KC1	171	ENSSSCG00000015586	ENSSSCT00000016979, ENSSSCT00000016980, ENSSSCT00000036947, ENSSSCT00000050185, ENSSSCT00000050930, ENSSSCT00000059546, ENSSSCT00000061768, ENSSSCT00000065919, XM_021063832, XM_021063833, XM_021063834, XM_021063835, XM_021063836, XM_021063837, XM_021063839, XM_021063840, XM_021063841, XM_021063842, XM_021063843, XM_021063844, XM_021063845, XM_021063846, XM_021063847	9:130172639-130435295:-1	ribosomal protein S6 kinase C1	Cluster001
RRAS2	640	.	XM_021083301, XM_021083302, XM_021083303, XM_021083304, XM_021083305	.	related RAS viral (r-ras) oncogene homolog 2	Cluster001
RRN3	521	ENSSSCG00000033356	ENSSSCT00000044185, ENSSSCT00000045768, XM_021086179, XM_021086180	3:7535339-7572389:-1	RRN3 homolog, RNA polymerase I transcription factor	Cluster001
RRS1	375	ENSSSCG00000006214	ENSSSCT00000006810	4:68286991-68288088:-1	ribosome biogenesis regulator homolog	Cluster001
RSBN1	157	ENSSSCG00000030154	ENSSSCT00000025140, ENSSSCT00000039380	4:106759050-106806863:+1	round spermatid basic protein 1	Cluster001
RSBN1L	276	ENSSSCG00000038977	ENSSSCT00000049333, XM_021102552	9:102363944-102435215:-1	round spermatid basic protein 1 like	Cluster001
RSC1A1	57	ENSSSCG00000003461	ENSSSCT00000003847, ENSSSCT00000061903	6:74809373-74855426:+1	regulator of solute carriers 1	Cluster001
RSF1	457	ENSSSCG00000014882	ENSSSCT00000016236	9:12128808-12278109:-1	remodeling and spacing factor 1	Cluster001
RSL1D1	95	ENSSSCG00000023984	ENSSSCT00000023591, XM_021086592	3:31278389-31291204:+1	ribosomal L1 domain containing 1	Cluster001
RSPO3	241	ENSSSCG00000004218	ENSSSCT00000004661, ENSSSCT00000065461	1:35984950-36066958:-1	R-spondin 3	Cluster001
RSPRY1	388	ENSSSCG00000002820	ENSSSCT00000003120, XM_021093907	6:19154419-19204824:+1	ring finger and SPRY domain containing 1	Cluster001
RSRC1	53	.	XM_021069723	.	arginine and serine rich coiled-coil 1	Cluster001
RSRC2	712	ENSSSCG00000009791	ENSSSCT00000010733, ENSSSCT00000046981, ENSSSCT00000064486, XM_003483417, XM_005670608, XM_005670609, XM_013982805, XM_013982806, XM_021074086	14:30242089-30261600:+1	arginine and serine rich coiled-coil 2	Cluster001
RSU1	13	ENSSSCG00000011042	ENSSSCT00000012086, XM_021064827, XM_021064828, XM_021064829	10:45079007-45289430:+1	Ras suppressor protein 1	Cluster001
RTF1	775	ENSSSCG00000004747	ENSSSCT00000031282, XM_021097446	1:129884837-129942855:-1	RTF1 homolog, Paf1/RNA polymerase II complex component	Cluster001
RTL5	25	ENSSSCG00000020876	ENSSSCT00000022492, XM_005657832	X:58008200-58012972:-1	retrotransposon Gag like 5	Cluster001
RUFY1	16	ENSSSCG00000014023	ENSSSCT00000015318, ENSSSCT00000059445, ENSSSCT00000066102, XM_021084324, XM_021084325	2:78974382-79016627:-1	RUN and FYVE domain containing 1	Cluster001
RUFY2	89	ENSSSCG00000010239	ENSSSCT00000011206, XM_021073521	14:71500830-71544880:-1	RUN and FYVE domain containing 2	Cluster001
RUFY3	79	ENSSSCG00000025514	ENSSSCT00000028087, ENSSSCT00000043983, ENSSSCT00000047559, ENSSSCT00000057211, ENSSSCT00000061201, XM_003129076, XM_003356969, XM_005656513, XM_005656514, XM_005656515, XM_005656517, XM_013989312, XM_013989313, XM_021101418	8:67495464-67582142:+1	RUN and FYVE domain containing 3	Cluster001
RUNDC3B	1	ENSSSCG00000024485	ENSSSCT00000026738, ENSSSCT00000030941, ENSSSCT00000038377, ENSSSCT00000052446, XM_003357481, XM_021102517, XM_021102519, XM_021102522	9:92528665-92823561:-1	RUN domain containing 3B	Cluster001
RUNX1T1	587	ENSSSCG00000006115	ENSSSCT00000006707, ENSSSCT00000037553, ENSSSCT00000041426, ENSSSCT00000047855, ENSSSCT00000054962, ENSSSCT00000055449, ENSSSCT00000059899, XM_021089123	4:44599704-44743418:+1	RUNX1 translocation partner 1	Cluster001
RWDD4	199	ENSSSCG00000015776	ENSSSCT00000017177, ENSSSCT00000047381, XM_013984029, XM_021075119	15:44975112-44989421:-1	RWD domain containing 4	Cluster001
RYBP	457	ENSSSCG00000025053	ENSSSCT00000024414, ENSSSCT00000064819	13:53724065-53809630:-1	RING1 and YY1 binding protein	Cluster001
RYK	117	ENSSSCG00000011642	ENSSSCT00000012743, ENSSSCT00000046732, XM_021069472	13:75287415-75366199:-1	receptor-like tyrosine kinase	Cluster001
SAFB	432	ENSSSCG00000013522	ENSSSCT00000014769, ENSSSCT00000042991, XM_021084023, XM_021084024	2:73300638-73334950:-1	scaffold attachment factor B	Cluster001
SAFB2	238	ENSSSCG00000013523	ENSSSCT00000014770, ENSSSCT00000063521, ENSSSCT00000065034, XM_021084025, XM_021084026, XM_021084027	2:73334561-73369359:+1	scaffold attachment factor B2	Cluster001
SAP30BP	416	ENSSSCG00000017205	ENSSSCT00000018730, ENSSSCT00000023832, XM_003131203	12:5695256-5732231:-1	SAP30 binding protein	Cluster001
SATB1	372	ENSSSCG00000011201	ENSSSCT00000012267, XM_003358325	13:5317829-5392984:-1	SATB homeobox 1	Cluster001
SATB2	467	ENSSSCG00000021657	ENSSSCT00000031264, ENSSSCT00000033962, ENSSSCT00000036717, XM_021076068, XM_021076069, XM_021076070, XM_021076071, XM_021076072, XM_021076073, XM_021076074, XM_021076075, XM_021076076, XM_021076077, XM_021076078	15:102964469-103172289:-1	SATB homeobox 2	Cluster001
SBF2	855	ENSSSCG00000013409	ENSSSCT00000014649, ENSSSCT00000024151, ENSSSCT00000051649, ENSSSCT00000064321, ENSSSCT00000066259, XM_003122980, XM_005661131, XM_013994573	2:49241933-49691760:+1	SET binding factor 2	Cluster001
SCAF8	441	ENSSSCG00000004070	ENSSSCT00000004499, ENSSSCT00000048023, ENSSSCT00000056077, ENSSSCT00000057187, ENSSSCT00000062929, ENSSSCT00000065131, XM_021072006, XM_021072011, XM_021072016, XM_021072020, XM_021072034, XM_021072042, XM_021072047, XM_021072049	1:11929991-12146676:-1	SR-related CTD associated factor 8	Cluster001
SCAI	418	ENSSSCG00000005598	ENSSSCT00000006156, ENSSSCT00000044592, XM_003122166, XM_021068616	1:265714214-265867103:-1	suppressor of cancer cell invasion	Cluster001
SCAPER	824	ENSSSCG00000001865	ENSSSCT00000002090, ENSSSCT00000040228, ENSSSCT00000056817, XM_021099012, XM_021099013, XM_021099014, XM_021099015, XM_021099016	7:56582136-57012369:-1	S-phase cyclin A associated protein in the ER	Cluster001
SCFD1	109	ENSSSCG00000001973	ENSSSCT00000002206, ENSSSCT00000047473, ENSSSCT00000062123, XM_021099899, XM_021099900, XM_021099902, XM_021099903, XM_021099904, XM_021099905	7:68693365-68851008:-1	sec1 family domain containing 1	Cluster001
SCLT1	12	ENSSSCG00000029943	ENSSSCT00000009935, ENSSSCT00000027726, ENSSSCT00000038334, ENSSSCT00000045819, ENSSSCT00000046797, XM_013989334, XM_021100693, XM_021100694, XM_021100695	8:95949433-96199111:+1	sodium channel and clathrin linker 1	Cluster001
SCML1	120	.	XM_005673461, XM_005673462, XM_005673465, XM_005673466, XM_005673467, XM_005673468, XM_005673469, XM_013985947, XM_021080145, XM_021080146	.	sex comb on midleg like 1 (Drosophila)	Cluster001
SCML2	93	ENSSSCG00000012155	ENSSSCT00000013296, ENSSSCT00000032925, ENSSSCT00000033664, ENSSSCT00000066060, XM_003134958, XM_005673471, XM_013985953, XM_013985954	X:14714778-14823413:-1	sex comb on midleg like 2 (Drosophila)	Cluster001
SCN3A	558	ENSSSCG00000015911	ENSSSCT00000017325, ENSSSCT00000053492, XM_013984205, XM_021074930, XM_021074931, XM_021074932, XM_021074933, XM_021074934, XM_021074935, XM_021074936, XM_021074937, XM_021074938, XM_021074939, XM_021074940, XM_021074941, XM_021074942	15:71717333-71824160:-1	sodium voltage-gated channel alpha subunit 3	Cluster001
SCN9A	93	ENSSSCG00000015913	ENSSSCT00000017327, ENSSSCT00000039636, ENSSSCT00000053807, ENSSSCT00000065025, XM_021076176, XM_021076177, XM_021076178	15:72745114-72912407:-1	sodium voltage-gated channel alpha subunit 9	Cluster001
SCYL2	431	ENSSSCG00000000877	ENSSSCT00000000960, ENSSSCT00000029830, ENSSSCT00000040713, ENSSSCT00000045567, ENSSSCT00000049215, ENSSSCT00000053383, XM_021092720, XM_021092721, XM_021092722, XM_021092724	5:83812681-83879088:-1	SCY1 like pseudokinase 2	Cluster001
SDAD1	60	.	XM_003129088, XM_005666768	.	SDA1 domain containing 1	Cluster001
SDCCAG8	95	ENSSSCG00000035136	ENSSSCT00000011893, ENSSSCT00000028157, XM_021064172, XM_021064174, XM_021064175, XM_021064176, XM_021064177, XM_021064178, XM_021064181, XM_021064182, XM_021064183, XM_021064184, XM_021064185	10:16191809-16441823:+1	serologically defined colon cancer antigen 8	Cluster001
SDE2	40	ENSSSCG00000010858	ENSSSCT00000011880, ENSSSCT00000036806, XM_003130543	10:13876426-13897862:-1	SDE2 telomere maintenance homolog	Cluster001
SEC23A	3	.	XM_005666190	.	Sec23 homolog A, coat complex II component	Cluster001
SEC24A	60	ENSSSCG00000014304	ENSSSCT00000015628, ENSSSCT00000040922, ENSSSCT00000048923, ENSSSCT00000061719, ENSSSCT00000062247, XM_021078134	2:136833405-136952178:+1	SEC24 homolog A, COPII coat complex component	Cluster001
SEC24B	111	ENSSSCG00000009142	ENSSSCT00000010010, ENSSSCT00000042746, XM_021101680, XM_021101682, XM_021101683	8:112670533-112762870:-1	SEC24 homolog B, COPII coat complex component	Cluster001
SEC63	479	ENSSSCG00000004382	ENSSSCT00000004844, ENSSSCT00000056557, ENSSSCT00000057333, XM_001925479, XM_021090779	1:74000950-74078610:-1	SEC63 homolog, protein translocation regulator	Cluster001
SEL1L	127	ENSSSCG00000002414	ENSSSCT00000002683, ENSSSCT00000049435, XM_021099584, XM_021099585	7:104218296-104283256:-1	SEL1L ERAD E3 ligase adaptor subunit	Cluster001
SEMA3C	68	ENSSSCG00000023784	ENSSSCT00000031885, XM_013979789, XM_021063487, XM_021063488	9:99251338-99433224:+1	semaphorin 3C	Cluster001
SEMA4G	35	ENSSSCG00000029533	ENSSSCT00000026339, ENSSSCT00000047122	14:112057201-112066792:+1	semaphorin 4G	Cluster001
SENP1	52	ENSSSCG00000000816	ENSSSCT00000000889, ENSSSCT00000062578, ENSSSCT00000064113, ENSSSCT00000065021, XM_005664162, XM_013997973, XM_013997974, XM_013997976, XM_013997978, XM_013997979	5:78423137-78476313:-1	SUMO1/sentrin specific peptidase 1	Cluster001
SENP6	134	ENSSSCG00000020702	ENSSSCT00000026640, ENSSSCT00000037375, ENSSSCT00000038303, ENSSSCT00000058321, ENSSSCT00000064205, XM_021092294, XM_021092296, XM_021092302, XM_021092307, XM_021092309	1:90166647-90300286:-1	SUMO1/sentrin specific peptidase 6	Cluster001
SENP7	108	ENSSSCG00000021791	ENSSSCT00000022387, ENSSSCT00000039429, ENSSSCT00000040456, ENSSSCT00000042835, ENSSSCT00000058114, XM_013990163	13:157504281-157672814:+1	SUMO1/sentrin specific peptidase 7	Cluster001
SEPT3	490	.	XM_001928669, XM_021091436, XM_021091437, XM_021091438	.	septin 3	Cluster001
SEPT5	521	.	XM_001929628, XM_003133010	.	septin 5	Cluster001
SEPT6	372	ENSSSCG00000012619	ENSSSCT00000013798, ENSSSCT00000033202, ENSSSCT00000034429, ENSSSCT00000034508, ENSSSCT00000035573, ENSSSCT00000035644, ENSSSCT00000036221, XM_005673868, XM_013986372, XM_013986373, XM_013986374, XM_013986377, XM_021080247, XM_021080248, XM_021080249, XM_021080250, XM_021080251, XM_021080252, XM_021080253	X:98033215-98106082:-1	septin 6	Cluster001
SEPT11	344	ENSSSCG00000008986	ENSSSCT00000009843, ENSSSCT00000035968, ENSSSCT00000045826, ENSSSCT00000047666, ENSSSCT00000059403, ENSSSCT00000059505, ENSSSCT00000064309, ENSSSCT00000064894, XM_003129096, XM_005666782, XM_005666785, XM_005666786, XM_013978808, XM_021101469, XM_021101472, XM_021101473, XM_021101474, XM_021101476, XM_021101477	8:72543637-72679166:+1	septin 11	Cluster001
SERGEF	4	.	XM_003122944, XM_013994509, XM_013994510, XM_021083267, XM_021083268, XM_021083269	.	secretion regulating guanine nucleotide exchange factor	Cluster001
SERTAD4	350	ENSSSCG00000026404	ENSSSCT00000027635, XM_003130419, XM_005667880, XM_005667881, XM_013979993, XM_013979994, XM_013979995	9:132737299-132749395:-1	SERTA domain containing 4	Cluster001
SERTM1	96	ENSSSCG00000040557	ENSSSCT00000045903, ENSSSCT00000055684	11:12576596-12600660:+1	serine rich and transmembrane domain containing 1	Cluster001
SESTD1	484	ENSSSCG00000016005	ENSSSCT00000017426, ENSSSCT00000017427, ENSSSCT00000065199, XM_003133513, XM_021075318, XM_021075319, XM_021075320, XM_021075321, XM_021075322	15:84760560-84958521:-1	SEC14 and spectrin domain containing 1	Cluster001
SET	279	.	XM_021071997, XM_021072036, XM_021072067	.	SET nuclear proto-oncogene	Cluster001
SETBP1	633	ENSSSCG00000004490	ENSSSCT00000004961, XM_013988555, XM_013988558, XM_021092436, XM_021092446, XM_021092449	1:94314556-94663029:+1	SET binding protein 1	Cluster001
SETD2	305	ENSSSCG00000011332	ENSSSCT00000012409, ENSSSCT00000042293, ENSSSCT00000044654, ENSSSCT00000051013, XM_021068704	13:29884710-29996359:-1	SET domain containing 2	Cluster001
SETD5	62	ENSSSCG00000011540	ENSSSCT00000012630, ENSSSCT00000012635, ENSSSCT00000047624, ENSSSCT00000048743, ENSSSCT00000049786, ENSSSCT00000051320, ENSSSCT00000056097, ENSSSCT00000058035, ENSSSCT00000061370, ENSSSCT00000066352, XM_013981946	13:65759965-65854432:+1	SET domain containing 5	Cluster001
SETDB1	365	ENSSSCG00000006645	ENSSSCT00000007281, ENSSSCT00000048341, ENSSSCT00000052187, ENSSSCT00000059337, ENSSSCT00000064394, XM_005663486, XM_005663487, XM_005663488, XM_013997179	4:98256868-98293486:-1	SET domain bifurcated 1	Cluster001
SETDB2	61	ENSSSCG00000009395	ENSSSCT00000010294, ENSSSCT00000048316, ENSSSCT00000048559, ENSSSCT00000050377, XM_003130966, XM_013980507, XM_013980508, XM_013980509, XM_013980512, XM_021065313, XM_021065314	11:18251218-18297826:-1	SET domain bifurcated 2	Cluster001
SETX	1	ENSSSCG00000005724	ENSSSCT00000006294, ENSSSCT00000040524, ENSSSCT00000042827, ENSSSCT00000043081, ENSSSCT00000045724, XM_013987041, XM_013987048, XM_021070644, XM_021070651, XM_021070661, XM_021070670, XM_021070681, XM_021070690, XM_021070698, XM_021070705, XM_021070714, XM_021070725, XM_021070731	1:272095358-272170762:-1	senataxin	Cluster001
SEZ6	36	ENSSSCG00000035445	ENSSSCT00000058218, ENSSSCT00000065889, XM_021067505	12:45179361-45203135:-1	seizure related 6 homolog	Cluster001
SF3B1	450	ENSSSCG00000016075	ENSSSCT00000017503, ENSSSCT00000046500, ENSSSCT00000048286, ENSSSCT00000054674, ENSSSCT00000055542, ENSSSCT00000058408, ENSSSCT00000059157, XM_001928794, XM_021075515	15:101191854-101337916:-1	splicing factor 3b subunit 1	Cluster001
SFMBT1	11	ENSSSCG00000011454	ENSSSCT00000012535, ENSSSCT00000047889, XM_021068954, XM_021068955	13:35024792-35180647:-1	Scm-like with four mbt domains 1	Cluster001
SFMBT2	1	ENSSSCG00000024480	ENSSSCT00000026286, XM_021065006, XM_021065007	10:63876966-64066546:+1	Scm-like with four mbt domains 2	Cluster001
SFPQ	350	ENSSSCG00000035690	ENSSSCT00000043368, ENSSSCT00000045859, ENSSSCT00000060562, XM_021095897, XM_021095898	6:91389859-91408301:-1	splicing factor proline and glutamine rich	Cluster001
SH2B2	95	ENSSSCG00000007682	ENSSSCT00000033081	3:9683139-9695157:+1	SH2B adaptor protein 2	Cluster001
SH3BGRL	135	ENSSSCG00000012452	ENSSSCT00000013618, XM_021080701, XM_021080702	X:64617675-64709005:+1	SH3 domain binding glutamate rich protein like	Cluster001
SH3BP5L	63	ENSSSCG00000025900	ENSSSCT00000024205, ENSSSCT00000050534, XM_003123598, XM_005661169, XM_013994599	2:52322966-52337607:+1	SH3 binding domain protein 5 like	Cluster001
SH3RF3	579	ENSSSCG00000038296	ENSSSCT00000008910, ENSSSCT00000056157, ENSSSCT00000064067, XM_021087104	3:47133532-47339565:-1	SH3 domain containing ring finger 3	Cluster001
SHF	153	.	XM_005659641, XM_005659642, XM_013993043, XM_013993044	.	Src homology 2 domain containing F	Cluster001
SHPRH	211	ENSSSCG00000004120	ENSSSCT00000004555, ENSSSCT00000039335, ENSSSCT00000044986, ENSSSCT00000060565, XM_013992509, XM_013992510, XM_021087080, XM_021087086	1:19612823-19695273:+1	SNF2 histone linker PHD RING helicase	Cluster001
SIMC1	185	ENSSSCG00000014062	ENSSSCT00000015361, XM_021084429, XM_021084430	2:81539714-81613702:-1	SUMO interacting motifs containing 1	Cluster001
SIN3A	319	ENSSSCG00000001880	ENSSSCT00000002105, ENSSSCT00000051465, ENSSSCT00000052755, ENSSSCT00000054251, ENSSSCT00000056584, ENSSSCT00000065325, XM_003482238, XM_013978058, XM_013978060, XM_021099022, XM_021099023, XM_021099024, XM_021099025, XM_021099026	7:58172045-58246118:+1	SIN3 transcription regulator family member A	Cluster001
SKI	189	ENSSSCG00000040944	ENSSSCT00000048902, XM_021095201	6:64188029-64242593:+1	SKI proto-oncogene	Cluster001
SLA	356	ENSSSCG00000005949	ENSSSCT00000035545, ENSSSCT00000065614	4:8189231-8248494:+1	Src like adaptor	Cluster001
SLAIN2	565	ENSSSCG00000008821	ENSSSCT00000009651, ENSSSCT00000048245, XM_003356917, XM_005666635	8:38241501-38321142:+1	SLAIN motif family member 2	Cluster001
SLC1A1	170	ENSSSCG00000005222	ENSSSCT00000005755	1:217319696-217441927:-1	solute carrier family 1 member 1	Cluster001
SLC1A4	491	ENSSSCG00000028282	ENSSSCT00000029680, XM_013996100	3:76938109-76970515:-1	solute carrier family 1 member 4	Cluster001
SLC25A27	53	ENSSSCG00000001720	ENSSSCT00000001923, ENSSSCT00000031260, ENSSSCT00000064761, XM_005666075, XM_005666076, XM_005666077, XM_005666078, XM_013977996, XM_021098112, XM_021098113, XM_021098115, XM_021098116, XM_021098117, XM_021098118, XM_021098119, XM_021098120, XM_021098121, XM_021098123	7:41426159-41457884:+1	solute carrier family 25 member 27	Cluster001
SLC25A32	63	.	XM_021089029	.	solute carrier family 25 member 32	Cluster001
SLC25A36	126	ENSSSCG00000036855	ENSSSCT00000039971, ENSSSCT00000063584, XM_013982079	13:81749989-81791923:+1	solute carrier family 25 member 36	Cluster001
SLC25A6	167	ENSSSCG00000033673	ENSSSCT00000048468, ENSSSCT00000064470	AEMK02000569.1:792981-820520:-1	solute carrier family 25 member 6	Cluster001
SLC30A10	223	ENSSSCG00000039095	ENSSSCT00000046075, ENSSSCT00000048233, ENSSSCT00000056486, XM_003357627	10:9527528-9567626:-1	solute carrier family 30 member 10	Cluster001
SLC30A7	57	ENSSSCG00000006860	ENSSSCT00000007513, ENSSSCT00000048059	4:117314845-117397862:-1	solute carrier family 30 member 7	Cluster001
SLC35B3	178	ENSSSCG00000001033	ENSSSCT00000001126, ENSSSCT00000049112, XM_021100161, XM_021100163, XM_021100164, XM_021100165, XM_021100166	7:5581756-5606551:-1	solute carrier family 35 member B3	Cluster001
SLC35F1	450	ENSSSCG00000004250	ENSSSCT00000004697, XM_021089044, XM_021089050	1:43653375-43809924:-1	solute carrier family 35 member F1	Cluster001
SLC35F2	132	ENSSSCG00000015001	ENSSSCT00000016365, XM_013979349, XM_013979350	9:36286328-36342092:-1	solute carrier family 35 member F2	Cluster001
SLC37A1	253	ENSSSCG00000012087	ENSSSCT00000013221, ENSSSCT00000041211, ENSSSCT00000043484, ENSSSCT00000047526, ENSSSCT00000047533, ENSSSCT00000066005, XM_021071026, XM_021071027, XM_021071028, XM_021071029, XM_021071030, XM_021071031, XM_021071032	13:205826532-205904276:+1	solute carrier family 37 member 1	Cluster001
SLC38A2	145	ENSSSCG00000000808	ENSSSCT00000000877, ENSSSCT00000000878, XM_013997964	5:77113494-77127714:-1	solute carrier family 38 member 2	Cluster001
SLC39A10	167	ENSSSCG00000031954	ENSSSCT00000040848, ENSSSCT00000049691, ENSSSCT00000050034, ENSSSCT00000052551, ENSSSCT00000055412, ENSSSCT00000057504, XM_021075817, XM_021075818, XM_021075819, XM_021075820, XM_021075821, XM_021075824, XM_021075825	15:99584613-99724613:+1	solute carrier family 39 member 10	Cluster001
SLC39A6	812	ENSSSCG00000027455	ENSSSCT00000025953, ENSSSCT00000037705, ENSSSCT00000041174, XM_021096271, XM_021096272	6:119861844-119926665:-1	solute carrier family 39 member 6	Cluster001
SLC44A5	189	ENSSSCG00000003777	ENSSSCT00000004180, ENSSSCT00000043528, XM_013996232, XM_013996239, XM_021096465, XM_021096467, XM_021096468	6:137832184-138009482:+1	solute carrier family 44 member 5	Cluster001
SLC49A4	70	ENSSSCG00000036766	ENSSSCT00000045256	13:137638077-137739045:-1	solute carrier family 49 member 4	Cluster001
SLC5A3	25	ENSSSCG00000034167	ENSSSCT00000065757	13:197688632-197718695:+1	solute carrier family 5 member 3	Cluster001
SLC6A15	3	ENSSSCG00000000936	ENSSSCT00000001022, XM_021092796, XM_021092797	5:97092947-97151922:+1	solute carrier family 6 member 15	Cluster001
SLC8A1	313	ENSSSCG00000036418	ENSSSCT00000039359, ENSSSCT00000042832, ENSSSCT00000044748, ENSSSCT00000047281, ENSSSCT00000058849, ENSSSCT00000064033, XM_021088305, XM_021088306, XM_021088307, XM_021088308, XM_021088309, XM_021088310, XM_021088312, XM_021088314, XM_021088315, XM_021088316, XM_021088317, XM_021088318, XM_021088319, XM_021088320, XM_021088321, XM_021088322, XM_021088323, XM_021088325, XM_021088326, XM_021088327,…	3:99823548-100244770:+1	solute carrier family 8 member A1	Cluster001
SLC8A2	153	ENSSSCG00000029567	ENSSSCT00000024548, ENSSSCT00000057555, XM_021094637, XM_021094638, XM_021094639	6:53200659-53231802:-1	solute carrier family 8 member A2	Cluster001
SLC9B2	2	ENSSSCG00000028101	ENSSSCT00000010033, ENSSSCT00000022582, ENSSSCT00000047847, XM_013989367, XM_013989372, XM_013989373, XM_021100728, XM_021100729, XM_021100731	8:117996843-118079194:+1	solute carrier family 9 member B2	Cluster001
SLC9C2	41	ENSSSCG00000015489	ENSSSCT00000016873, ENSSSCT00000043607	9:115873756-115944609:-1	ankyrin repeat domain-containing protein 45	Cluster001
SLIT1	43	ENSSSCG00000010512	ENSSSCT00000011502, ENSSSCT00000061553, XM_021072814	14:108445900-108624524:-1	slit guidance ligand 1	Cluster001
SLITRK5	135	ENSSSCG00000009488	ENSSSCT00000010403, XM_013980614, XM_013980615, XM_013980616	11:57796629-57800854:+1	SLIT and NTRK like family member 5	Cluster001
SLMAP	30	ENSSSCG00000038873	ENSSSCT00000012550, ENSSSCT00000037792, ENSSSCT00000043072, ENSSSCT00000045871, ENSSSCT00000051827, ENSSSCT00000052147, ENSSSCT00000052860, ENSSSCT00000054430, ENSSSCT00000064853, XM_021069013, XM_021069015, XM_021069018, XM_021069019, XM_021069020, XM_021069021, XM_021069023, XM_021069024, XM_021069026, XM_021069028, XM_021069029, XM_021069030, XM_021069032, XM_021069033, XM_021069034, XM_021069…	13:39571962-39721511:+1	sarcolemma associated protein	Cluster001
SLTM	276	ENSSSCG00000004592	ENSSSCT00000005071, ENSSSCT00000005073, ENSSSCT00000037087, ENSSSCT00000039763, ENSSSCT00000043725, ENSSSCT00000052540, XM_021073578, XM_021073584, XM_021073587, XM_021073590, XM_021073596, XM_021073604, XM_021073609, XM_021073614, XM_021073617, XM_021073618, XM_021073623, XM_021073626, XM_021073634, XM_021073639, XM_021073646, XM_021073653, XM_021073663, XM_021073671	1:113084864-113136206:+1	SAFB like transcription modulator	Cluster001
SLU7	198	ENSSSCG00000017033	ENSSSCT00000018545	16:63118710-63136234:+1	SLU7 homolog, splicing factor	Cluster001
SMAD2	253	ENSSSCG00000004505	ENSSSCT00000004977, ENSSSCT00000042255, ENSSSCT00000045010, ENSSSCT00000046471, ENSSSCT00000054452, XM_005659448, XM_005659449, XM_013992841, XM_021092635, XM_021092745, XM_021092986	1:97415716-97511880:-1	SMAD family member 2	Cluster001
SMAD4	185	ENSSSCG00000004524	ENSSSCT00000004997, ENSSSCT00000039851, ENSSSCT00000041073, ENSSSCT00000045286, ENSSSCT00000058124, ENSSSCT00000059572, XM_005654429, XM_013985326	1:100514791-100632822:+1	SMAD family member 4	Cluster001
SMAD5	106	ENSSSCG00000014319	ENSSSCT00000015645, ENSSSCT00000036284, ENSSSCT00000041137, ENSSSCT00000053829, XM_021084785, XM_021084786, XM_021084787, XM_021084788	2:138287431-138344762:+1	SMAD family member 5	Cluster001
SMAP1	117	ENSSSCG00000004276	ENSSSCT00000004726, ENSSSCT00000050145, ENSSSCT00000051535, ENSSSCT00000052276, ENSSSCT00000052865, ENSSSCT00000056202, ENSSSCT00000057791, XM_021089443, XM_021089445, XM_021089451, XM_021089462, XM_021089472, XM_021089481	1:50721701-50945633:+1	small ArfGAP 1	Cluster001
SMARCA2	591	ENSSSCG00000005232	ENSSSCT00000005766, ENSSSCT00000042433, ENSSSCT00000043939, ENSSSCT00000048038, ENSSSCT00000048039, ENSSSCT00000051022, ENSSSCT00000056608, ENSSSCT00000061394, ENSSSCT00000062859, XM_021064291, XM_021064299, XM_021064307, XM_021064313, XM_021064320, XM_021064325, XM_021064332, XM_021064340, XM_021064345, XM_021064354, XM_021064364	1:219624776-219815480:-1	SWI/SNF related, matrix associated, actin dependent regulator of chromatin, subfamily a, member 2	Cluster001
SMARCA5	51	ENSSSCG00000009047	ENSSSCT00000009907, ENSSSCT00000064754, XM_003129174	8:84137838-84224877:-1	SWI/SNF related, matrix associated, actin dependent regulator of chromatin, subfamily a, member 5	Cluster001
SMARCAD1	674	ENSSSCG00000009193	ENSSSCT00000010066, ENSSSCT00000045825, ENSSSCT00000054734, XM_005666984, XM_005666985, XM_021101760	8:125409490-125488481:-1	SWI/SNF-related, matrix-associated actin-dependent regulator of chromatin, subfamily a, containing DEAD/H box 1	Cluster001
SMARCC2	359	ENSSSCG00000000382	ENSSSCT00000000410, ENSSSCT00000032096, ENSSSCT00000040017, ENSSSCT00000043227, ENSSSCT00000049060, XM_001929168, XM_003481619, XM_005655623, XM_005655624, XM_005655625, XM_021092848, XM_021092849, XM_021092850, XM_021092851, XM_021092852, XM_021092853	5:21560934-21636211:-1	SWI/SNF related, matrix associated, actin dependent regulator of chromatin subfamily c member 2	Cluster001
SMARCE1	475	ENSSSCG00000039137	ENSSSCT00000019017, ENSSSCT00000048967, ENSSSCT00000049187, ENSSSCT00000061009, XM_021067015, XM_021067016	12:21784405-21810496:+1	SWI/SNF related, matrix associated, actin dependent regulator of chromatin, subfamily e, member 1	Cluster001
SMC1A	131	ENSSSCG00000012325	ENSSSCT00000013478, ENSSSCT00000028659, ENSSSCT00000033717, ENSSSCT00000035966, ENSSSCT00000039726, ENSSSCT00000065873, XM_005673650, XM_021080606	X:46144920-46220863:-1	structural maintenance of chromosomes 1A	Cluster001
SMC5	476	.	XM_021064741, XM_021064744, XM_021064752	.	structural maintenance of chromosomes 5	Cluster001
SMC6	522	ENSSSCG00000008614	ENSSSCT00000009425, ENSSSCT00000052433, ENSSSCT00000055247, ENSSSCT00000057352, XM_003125342	3:120097380-120170972:+1	structural maintenance of chromosomes 6	Cluster001
SMCHD1	695	ENSSSCG00000029030	ENSSSCT00000024634, ENSSSCT00000025549, ENSSSCT00000029309, XM_021096137, XM_021096138	6:103808904-103986144:-1	structural maintenance of chromosomes flexible hinge domain containing 1	Cluster001
SMG1	576	ENSSSCG00000032531	ENSSSCT00000054147, ENSSSCT00000054686, XM_021086547, XM_021086548, XM_021086549, XM_021086550, XM_021086551, XM_021086552	3:26653779-26753738:+1	SMG1, nonsense mediated mRNA decay associated PI3K related kinase	Cluster001
SMG6	72	ENSSSCG00000017826	ENSSSCT00000019401, ENSSSCT00000043650, XM_013981205, XM_021067586, XM_021067587, XM_021067588, XM_021067589, XM_021067590, XM_021067591	12:48171859-48386760:-1	SMG6, nonsense mediated mRNA decay factor	Cluster001
SMIM14	364	ENSSSCG00000021793	ENSSSCT00000028286, XM_021101115	8:30765428-30840455:-1	small integral membrane protein 14	Cluster001
SMIM18	219	ENSSSCG00000033236	ENSSSCT00000056316, XM_005671816, XM_005671817, XM_021074862	15:54455885-54464338:-1	small integral membrane protein 18	Cluster001
SMIM8	178	ENSSSCG00000004300	ENSSSCT00000004754, XM_005659276	1:55753933-55763969:+1	small integral membrane protein 8	Cluster001
SMNDC1	292	ENSSSCG00000030507	ENSSSCT00000028296, ENSSSCT00000050809, XM_005671451	14:120725400-120739752:-1	survival motor neuron domain containing 1	Cluster001
SMPD3	71	ENSSSCG00000002764	ENSSSCT00000003062, ENSSSCT00000041647, ENSSSCT00000055763, ENSSSCT00000064195, XM_005655777, XM_013988511, XM_021094148, XM_021094149, XM_021094150	6:28936467-29025391:-1	sphingomyelin phosphodiesterase 3	Cluster001
SMS	402	.	XM_021079653	.	spermine synthase	Cluster001
SMURF2	386	ENSSSCG00000032176	ENSSSCT00000038813, XM_021066754	12:14368701-14492108:+1	SMAD specific E3 ubiquitin protein ligase 2	Cluster001
SNAP29	13	ENSSSCG00000010094	ENSSSCT00000011055, ENSSSCT00000062497, XM_003132993	14:50492115-50509222:+1	synaptosome associated protein 29	Cluster001
SNAPC1	10	ENSSSCG00000005097	ENSSSCT00000005619, ENSSSCT00000051071, ENSSSCT00000064072, XM_005652698, XM_013988720, XM_013988729, XM_013988734, XM_021062485, XM_021062492, XM_021062512, XM_021062518	1:190677904-190714756:+1	small nuclear RNA activating complex polypeptide 1	Cluster001
SNCA	1	ENSSSCG00000009203	ENSSSCT00000010077, ENSSSCT00000045276, ENSSSCT00000055875, ENSSSCT00000061701, ENSSSCT00000065155, XM_005666989, XM_005666990, XM_005666991, XM_013979018, XM_013979019, XM_013979020, XM_013979021, XM_013979022, XM_013979023, XM_021100513, XM_021100514, XM_021100515	8:129247737-129388305:+1	synuclein alpha	Cluster001
SNCAIP	70	ENSSSCG00000014235	ENSSSCT00000015553, ENSSSCT00000039611, ENSSSCT00000047980, ENSSSCT00000063464	2:125889165-125956865:+1	synuclein alpha interacting protein	Cluster001
SNRNP200	110	ENSSSCG00000008127	ENSSSCT00000008903, ENSSSCT00000051137, XM_021087098, XM_021087099	3:46929051-46964357:+1	small nuclear ribonucleoprotein U5 subunit 200	Cluster001
SNRNP27	177	ENSSSCG00000025674	ENSSSCT00000023271, ENSSSCT00000045419, XM_003481192	3:72551819-72565946:-1	small nuclear ribonucleoprotein U4/U6.U5 subunit 27	Cluster001
SNRNP48	381	.	XM_021100159	.	small nuclear ribonucleoprotein U11/U12 subunit 48	Cluster001
SNRPF	182	ENSSSCG00000000895	ENSSSCT00000000979	5:87613932-87622951:-1	small nuclear ribonucleoprotein polypeptide F	Cluster001
SNX10	216	ENSSSCG00000037598	ENSSSCT00000018190, ENSSSCT00000039859, ENSSSCT00000044311, XM_003134848, XM_005673306, XM_021079049	18:46061611-46143002:-1	sorting nexin 10	Cluster001
SNX2	62	ENSSSCG00000022790	ENSSSCT00000030585, ENSSSCT00000038853, ENSSSCT00000051261, ENSSSCT00000059250, XM_013986699, XM_021084682	2:126271216-126331859:+1	sorting nexin 2	Cluster001
SNX4	527	ENSSSCG00000036828	ENSSSCT00000036956, ENSSSCT00000045195, ENSSSCT00000046745, XM_021070203, XM_021070204, XM_021070206, XM_021070207	13:134824068-134898690:+1	sorting nexin 4	Cluster001
SOCS2	374	.	XM_005664258, XM_005664259, XM_005664260, XM_013998080, XM_013998081, XM_013998083, XM_013998084	.	suppressor of cytokine signaling 2	Cluster001
SON	192	ENSSSCG00000023674	ENSSSCT00000026483, ENSSSCT00000060699, ENSSSCT00000063351, ENSSSCT00000065483, XM_003358932, XM_005657147	13:197161237-197197123:+1	SON DNA binding protein	Cluster001
SOS1	76	ENSSSCG00000008478	ENSSSCT00000009279, ENSSSCT00000009280, ENSSSCT00000039269, ENSSSCT00000044630, ENSSSCT00000054983, ENSSSCT00000061552, XM_021087587, XM_021087588, XM_021087589	3:101089243-101362724:+1	SOS Ras/Rac guanine nucleotide exchange factor 1	Cluster001
SOS2	152	ENSSSCG00000005015	ENSSSCT00000005531, ENSSSCT00000063003, XM_021101439	1:179907590-180069092:-1	SOS Ras/Rho guanine nucleotide exchange factor 2	Cluster001
SOX12	76	ENSSSCG00000021920	ENSSSCT00000029854	17:34857022-34857960:-1	SRY-box 12	Cluster001
SOX6	9	ENSSSCG00000034191	ENSSSCT00000014619, ENSSSCT00000044979, ENSSSCT00000051326, ENSSSCT00000055966, ENSSSCT00000056025, ENSSSCT00000060827, ENSSSCT00000062538, ENSSSCT00000064721, XM_021085317, XM_021085318, XM_021085319, XM_021085320, XM_021085321, XM_021085322, XM_021085323, XM_021085324, XM_021085325, XM_021085326, XM_021085327, XM_021085328, XM_021085330, XM_021085331, XM_021085332, XM_021085333, XM_021085334, X…	2:42452778-43068323:+1	SRY-box 6	Cluster001
SP3	475	ENSSSCG00000015962	ENSSSCT00000017380, XM_021075841, XM_021075842	15:79935363-79985778:-1	Sp3 transcription factor	Cluster001
SP4	104	ENSSSCG00000015378	ENSSSCT00000016753, ENSSSCT00000046035, ENSSSCT00000053051, ENSSSCT00000057177, ENSSSCT00000060410, XM_003482682	9:90336690-90410527:+1	Sp4 transcription factor	Cluster001
SPATA7	35	ENSSSCG00000002424	ENSSSCT00000002693, ENSSSCT00000037028, ENSSSCT00000044126, ENSSSCT00000052118, XM_013978349	7:110309462-110364033:+1	spermatogenesis associated 7	Cluster001
SPATS2	16	.	XM_013988258, XM_021091602	.	spermatogenesis associated serine rich 2	Cluster001
SPECC1L	168	.	XM_005670893, XM_013983118, XM_021073796, XM_021073797, XM_021073798, XM_021073799, XM_021073800, XM_021073801, XM_021073802, XM_021073803, XM_021073804, XM_021073805	.	sperm antigen with calponin homology and coiled-coil domains 1 like	Cluster001
SPEN	90	ENSSSCG00000034484	ENSSSCT00000042154, ENSSSCT00000064339, XM_021095393	6:75001088-75103474:+1	spen family transcriptional repressor	Cluster001
SPIN1	365	ENSSSCG00000035901	ENSSSCT00000037900, ENSSSCT00000043382, ENSSSCT00000048435	14:227107-294826:+1	spindlin 1	Cluster001
SPOCK1	400	ENSSSCG00000032423	ENSSSCT00000049977, ENSSSCT00000057783, XM_003354287, XM_005661679	2:139020176-139406457:-1	SPARC/osteonectin, cwcv and kazal like domains proteoglycan 1	Cluster001
SRBD1	116	ENSSSCG00000008445	ENSSSCT00000009247, ENSSSCT00000044314, ENSSSCT00000046422, XM_021087562, XM_021087563	3:94909139-95134517:+1	S1 RNA binding domain 1	Cluster001
SRD5A1	260	.	XM_003134156	.	steroid 5 alpha-reductase 1	Cluster001
SREK1	429	ENSSSCG00000032726	ENSSSCT00000041039, ENSSSCT00000052180, XM_021077027, XM_021077028, XM_021077029, XM_021077030, XM_021077032, XM_021077035	16:44578784-44619869:+1	splicing regulatory glutamic acid and lysine rich protein 1	Cluster001
SRFBP1	163	ENSSSCG00000022656	ENSSSCT00000031934, ENSSSCT00000038090, ENSSSCT00000040731, XM_021079835	2:125507483-125571393:+1	serum response factor binding protein 1	Cluster001
SRGAP1	496	ENSSSCG00000029815	ENSSSCT00000025861, ENSSSCT00000062028, XM_021091938, XM_021091939	5:28300950-28605119:+1	SLIT-ROBO Rho GTPase activating protein 1	Cluster001
SRGAP2	617	.	XM_013979624, XM_013979627, XM_013979628, XM_021063294, XM_021063295, XM_021063296, XM_021063297, XM_021063298, XM_021063300, XM_021063301, XM_021063302	.	SLIT-ROBO Rho GTPase activating protein 2	Cluster001
SRGAP3	345	ENSSSCG00000033624	ENSSSCT00000059432, XM_021071097	13:65372436-65516579:-1	SLIT-ROBO Rho GTPase activating protein 3	Cluster001
SRP14	654	ENSSSCG00000004785	ENSSSCT00000005284, ENSSSCT00000053992, XM_003121602	1:131241543-131247966:+1	signal recognition particle 14	Cluster001
SRP54	161	ENSSSCG00000001955	ENSSSCT00000002187, XM_001927799, XM_005656302	7:64829228-64877574:-1	signal recognition particle 54	Cluster001
SRP72	306	ENSSSCG00000008900	ENSSSCT00000009744, ENSSSCT00000053750, XM_021100536	8:55729247-55760635:+1	signal recognition particle 72	Cluster001
SRPK1	809	ENSSSCG00000001554	ENSSSCT00000001732, ENSSSCT00000039757, ENSSSCT00000049454, ENSSSCT00000056511, ENSSSCT00000058591, ENSSSCT00000059532, ENSSSCT00000062109, XM_005665912	7:31645755-31701405:-1	SRSF protein kinase 1	Cluster001
SRR	106	ENSSSCG00000039918	ENSSSCT00000047421, ENSSSCT00000060098, ENSSSCT00000065607, XM_021067609, XM_021067610, XM_021067611, XM_021067612, XM_021067613, XM_021067614	12:48386269-48408971:+1	serine racemase	Cluster001
SRRM1	86	ENSSSCG00000032947	ENSSSCT00000037032, ENSSSCT00000042480, ENSSSCT00000043509, ENSSSCT00000053795, ENSSSCT00000059743, ENSSSCT00000062684, ENSSSCT00000064553, ENSSSCT00000065408, ENSSSCT00000065942, XM_021095556, XM_021095557, XM_021095558, XM_021095559, XM_021095560, XM_021095562, XM_021095563, XM_021095564, XM_021095565, XM_021095566, XM_021095567, XM_021095568, XM_021095569, XM_021095570, XM_021095571, XM_021095…	6:82286211-82345834:+1	serine and arginine repetitive matrix 1	Cluster001
SRSF10	269	ENSSSCG00000036293	ENSSSCT00000037831, ENSSSCT00000048869, ENSSSCT00000061068, XM_021093377, XM_021093378, XM_021093379, XM_021093380, XM_021093381, XM_021093382	6:81706663-81741526:-1	serine and arginine rich splicing factor 10	Cluster001
SRSF11	584	ENSSSCG00000003791	ENSSSCT00000004195	6:142623110-142651683:-1	serine and arginine rich splicing factor 11	Cluster001
SRSF12	776	ENSSSCG00000032781	ENSSSCT00000039409, XM_021085130	1:57147075-57165800:-1	serine and arginine rich splicing factor 12	Cluster001
SS18L1	250	ENSSSCG00000035448	ENSSSCT00000027440, ENSSSCT00000065314	17:61571687-61598099:+1	SS18L1, nBAF chromatin remodeling complex subunit	Cluster001
SSB	460	ENSSSCG00000015938	ENSSSCT00000017354, ENSSSCT00000049757, XM_001924998, XM_005671925	15:76088598-76100746:+1	Sjogren syndrome antigen B	Cluster001
SSBP2	601	ENSSSCG00000035757	ENSSSCT00000039349, ENSSSCT00000043718, ENSSSCT00000060573, ENSSSCT00000062434, ENSSSCT00000062752, XM_021084507, XM_021084508, XM_021084509, XM_021084510, XM_021084511	2:89957682-90263803:-1	single stranded DNA binding protein 2	Cluster001
SSFA2	269	.	XM_021076136, XM_021076137, XM_021076138, XM_021076139, XM_021076141, XM_021076142	.	sperm specific antigen 2	Cluster001
SSTR2	347	ENSSSCG00000017249	ENSSSCT00000018778, XM_005668643	12:7764051-7789410:-1	somatostatin receptor 2	Cluster001
ST3GAL1	118	ENSSSCG00000005943	ENSSSCT00000006526, ENSSSCT00000035570, ENSSSCT00000047743, ENSSSCT00000061378, XM_005662836, XM_005662837, XM_013996463, XM_021088741, XM_021088742, XM_021088743, XM_021088744	4:7814273-7911047:+1	ST3 beta-galactoside alpha-2,3-sialyltransferase 1	Cluster001
ST6GAL1	201	ENSSSCG00000025770	ENSSSCT00000024829, ENSSSCT00000038264, ENSSSCT00000041901, ENSSSCT00000046712, ENSSSCT00000051540, ENSSSCT00000053461, ENSSSCT00000057753, ENSSSCT00000065900, XM_021070019, XM_021070020, XM_021070021, XM_021070022, XM_021070024, XM_021070025, XM_021070026, XM_021070028, XM_021070030, XM_021070032, XM_021070033, XM_021070034, XM_021070036, XM_021070037, XM_021070038	13:124699730-124837843:+1	ST6 beta-galactoside alpha-2,6-sialyltransferase 1	Cluster001
ST6GAL2	394	ENSSSCG00000008141	ENSSSCT00000008918, XM_003124855, XM_005662348, XM_013995897, XM_021087112	3:48648716-48718807:+1	ST6 beta-galactoside alpha-2,6-sialyltransferase 2	Cluster001
ST8SIA2	245	ENSSSCG00000039271	ENSSSCT00000039954, ENSSSCT00000059712	7:86445710-86514393:-1	ST8 alpha-N-acetyl-neuraminide alpha-2,8-sialyltransferase 2	Cluster001
STAC	269	ENSSSCG00000023085	ENSSSCT00000030689, XM_003358355	13:21429800-21544097:+1	SH3 and cysteine rich domain	Cluster001
STAG1	415	ENSSSCG00000011652	ENSSSCT00000012754, ENSSSCT00000012756, ENSSSCT00000060294, XM_021071121, XM_021071122, XM_021071123	13:77321880-77863508:-1	stromal antigen 1	Cluster001
STAG2	218	ENSSSCG00000012642	ENSSSCT00000013823, ENSSSCT00000033199, ENSSSCT00000033242, ENSSSCT00000048514, ENSSSCT00000049710, ENSSSCT00000051232, ENSSSCT00000063134, XM_005673884, XM_005673885, XM_005673887, XM_013986402, XM_013986404, XM_021080224, XM_021080225, XM_021080226, XM_021080227, XM_021080228, XM_021080230, XM_021080231, XM_021080232	X:101477233-101617563:+1	stromal antigen 2	Cluster001
STIM2	60	ENSSSCG00000008762	ENSSSCT00000009587, ENSSSCT00000023243, ENSSSCT00000059551, XM_003128897	8:20456243-20609281:+1	stromal interaction molecule 2	Cluster001
STK32B	303	ENSSSCG00000035020	ENSSSCT00000059237, XM_021100993	8:5056495-5418299:-1	serine/threonine kinase 32B	Cluster001
STK38	542	ENSSSCG00000001563	ENSSSCT00000001742, ENSSSCT00000065030, XM_001929552	7:32206534-32253679:-1	serine/threonine kinase 38	Cluster001
STK4	394	ENSSSCG00000030820	ENSSSCT00000008084, ENSSSCT00000035288, ENSSSCT00000043938, XM_021077859, XM_021077860, XM_021077861	17:47387600-47475718:+1	serine/threonine kinase 4	Cluster001
STMN1	740	ENSSSCG00000026257	ENSSSCT00000025212, ENSSSCT00000047868, ENSSSCT00000055479, ENSSSCT00000063762, XM_005665112	6:83352099-83386477:-1	stathmin 1	Cluster001
STMN2	674	ENSSSCG00000006160	ENSSSCT00000006754, ENSSSCT00000032694, ENSSSCT00000033041, XM_001928556	4:56952709-57006661:-1	stathmin 2	Cluster001
STOM	582	ENSSSCG00000036639	ENSSSCT00000061214, ENSSSCT00000066399, XM_021068281	1:261377866-261408229:-1	stomatin	Cluster001
STOX2	269	ENSSSCG00000015780	ENSSSCT00000017181, ENSSSCT00000039876, ENSSSCT00000059365, ENSSSCT00000060553, ENSSSCT00000063747, XM_005671698, XM_013984032, XM_021075611, XM_021075612, XM_021075613, XM_021075614, XM_021075615, XM_021075616, XM_021075617, XM_021075618	15:45084682-45299061:+1	storkhead box 2	Cluster001
STRADB	3	ENSSSCG00000031271	ENSSSCT00000027514, ENSSSCT00000036999, ENSSSCT00000040109, ENSSSCT00000044963, ENSSSCT00000065069, ENSSSCT00000066385, XM_003133587, XM_005654191, XM_005654192, XM_013982348, XM_021075700, XM_021075701	15:105055248-105269860:+1	STE20-related kinase adaptor beta	Cluster001
STRBP	297	ENSSSCG00000005582	ENSSSCT00000006135, ENSSSCT00000050780, ENSSSCT00000052201, ENSSSCT00000057725, ENSSSCT00000064320, XM_021074603, XM_021074606, XM_021074611	1:264045670-264195963:-1	spermatid perinuclear RNA binding protein	Cluster001
STRIP1	61	ENSSSCG00000006813	ENSSSCT00000007463, ENSSSCT00000056953, XM_003125856	4:110058299-110080781:-1	striatin interacting protein 1	Cluster001
STRN3	756	ENSSSCG00000040657	ENSSSCT00000037767, ENSSSCT00000040965, ENSSSCT00000046451, ENSSSCT00000054626, XM_021099885, XM_021099886, XM_021099888, XM_021099889, XM_021099890, XM_021099892, XM_021099893	7:68470756-68577265:+1	striatin 3	Cluster001
STRN4	107	ENSSSCG00000003104	ENSSSCT00000003443, ENSSSCT00000039431, XM_021094616, XM_021094617	6:52601938-52627905:-1	striatin 4	Cluster001
STX12	191	ENSSSCG00000024927	ENSSSCT00000032017	6:84918790-84960720:+1	syntaxin 12	Cluster001
STX6	192	ENSSSCG00000015539	ENSSSCT00000016928, ENSSSCT00000053131, ENSSSCT00000056784, ENSSSCT00000057369, ENSSSCT00000058656, XM_013979910, XM_021102005	9:122529727-122594896:-1	syntaxin 6	Cluster001
STX7	229	ENSSSCG00000004190	ENSSSCT00000004629, XM_001926476	1:31184925-31237640:+1	syntaxin 7	Cluster001
STXBP6	259	ENSSSCG00000001977	ENSSSCT00000002211, ENSSSCT00000043257, ENSSSCT00000058457, ENSSSCT00000062764, XM_005666215, XM_005666216, XM_005666218, XM_021098204, XM_021098205, XM_021098206, XM_021098207, XM_021098208, XM_021098209, XM_021098210	7:74294948-74551371:+1	syntaxin binding protein 6	Cluster001
SUDS3	320	ENSSSCG00000009849	ENSSSCT00000010795, XM_021071893, XM_021071895	14:34281073-34317076:-1	SDS3 homolog, SIN3A corepressor complex component	Cluster001
SUOX	414	ENSSSCG00000000376	ENSSSCT00000000402, ENSSSCT00000065108, XM_021091097, XM_021091098	5:21395266-21399736:+1	sulfite oxidase	Cluster001
SUPT16H	228	ENSSSCG00000022900	ENSSSCT00000031400, ENSSSCT00000041648, XM_001929180, XM_021099303	7:77781322-77817695:+1	SPT16 homolog, facilitates chromatin remodeling subunit	Cluster001
SUPT20H	178	ENSSSCG00000009359	ENSSSCT00000010256, ENSSSCT00000037044, ENSSSCT00000040086, ENSSSCT00000043361, ENSSSCT00000052734, ENSSSCT00000053123, ENSSSCT00000060979, XM_021065219, XM_021065220, XM_021065221, XM_021065222, XM_021065223, XM_021065224, XM_021065225, XM_021065226, XM_021065227, XM_021065228, XM_021065229, XM_021065230, XM_021065231, XM_021065232, XM_021065233, XM_021065234, XM_021065235, XM_021065236, XM_0210…	11:12825759-12865253:-1	SPT20 homolog, SAGA complex component	Cluster001
SUPT3H	194	ENSSSCG00000001709	ENSSSCT00000001909, XM_021099856, XM_021099857, XM_021099859	7:39762107-40161128:-1	SPT3 homolog, SAGA and STAGA complex component	Cluster001
SUPT7L	94	ENSSSCG00000008548	ENSSSCT00000009353, XM_005653046	3:111531665-111542000:+1	SPT7 like, STAGA complex gamma subunit	Cluster001
SURF2	19	ENSSSCG00000038459	ENSSSCT00000044498, XM_021071137	1:272970532-272977585:+1	surfeit 2	Cluster001
SUZ12	20	ENSSSCG00000017744	ENSSSCT00000019312, ENSSSCT00000043030, ENSSSCT00000052927, XM_003131745, XM_005669065, XM_005669069	12:42983388-43032751:-1	SUZ12 polycomb repressive complex 2 subunit	Cluster001
SWT1	294	ENSSSCG00000015569	ENSSSCT00000016960, ENSSSCT00000037950, ENSSSCT00000040797, ENSSSCT00000055779, XM_005667828, XM_013979933	9:126347586-126452887:+1	SWT1, RNA endoribonuclease homolog	Cluster001
SYBU	85	ENSSSCG00000006023	ENSSSCT00000006610, XM_021089009	4:27899434-27974660:+1	syntabulin	Cluster001
SYF2	175	ENSSSCG00000037481	ENSSSCT00000056349, XM_021095593	6:82834534-82843536:-1	SYF2 pre-mRNA splicing factor	Cluster001
SYNCRIP	425	.	XM_021089670, XM_021089676, XM_021089679, XM_021089683, XM_021089690, XM_021089693, XM_021089702	.	synaptotagmin binding cytoplasmic RNA interacting protein	Cluster001
SYNRG	29	ENSSSCG00000026596	ENSSSCT00000028499, ENSSSCT00000036739, ENSSSCT00000046617, ENSSSCT00000049452, ENSSSCT00000049980, ENSSSCT00000061712, XM_013989945, XM_021067343, XM_021067344, XM_021067345, XM_021067346, XM_021067347, XM_021067349, XM_021067350, XM_021067351, XM_021067352, XM_021067353, XM_021067354, XM_021067355, XM_021067356, XM_021067357, XM_021067359, XM_021067360, XM_021067361, XM_021067362, XM_021067363,…	12:38976023-39069868:-1	synergin gamma	Cluster001
SYT14	389	ENSSSCG00000015610	ENSSSCT00000017004, ENSSSCT00000046885, ENSSSCT00000062994, XM_005667888, XM_021063877, XM_021063879, XM_021063880, XM_021063881	9:132817948-133040924:-1	synaptotagmin 14	Cluster001
SYT5	167	ENSSSCG00000021843	ENSSSCT00000022455, ENSSSCT00000028654, ENSSSCT00000038975, XM_003356063, XM_005655967, XM_005655968	6:59381642-59415899:-1	synaptotagmin 5	Cluster001
TAB2	10	ENSSSCG00000004110	ENSSSCT00000004545, ENSSSCT00000034966, ENSSSCT00000038147, ENSSSCT00000041680, ENSSSCT00000058535, XM_013992499, XM_021086945, XM_021086959, XM_021086965, XM_021086968	1:16532938-16611369:-1	TGF-beta activated kinase 1/MAP3K7 binding protein 2	Cluster001
TAB3	460	ENSSSCG00000012203	ENSSSCT00000013348, ENSSSCT00000033151, ENSSSCT00000034334, ENSSSCT00000035796, XM_021080829, XM_021080830	X:26635448-26729038:-1	TGF-beta activated kinase 1 and MAP3K7 binding protein 3	Cluster001
TADA2A	235	ENSSSCG00000025775	ENSSSCT00000019262, ENSSSCT00000019263, ENSSSCT00000061144, XM_013989944, XM_021067335, XM_021067336, XM_021067337	12:38875213-38928635:+1	transcriptional adaptor 2A	Cluster001
TAF1	1	.	XM_021079950, XM_021079951, XM_021079952, XM_021079953	.	TATA-box binding protein associated factor 1	Cluster001
TAF1B	402	ENSSSCG00000008637	ENSSSCT00000009449, XM_021087858, XM_021087859, XM_021087860, XM_021087861	3:126523620-126586748:-1	TATA-box binding protein associated factor, RNA polymerase I subunit B	Cluster001
TAF1D	78	ENSSSCG00000038682	ENSSSCT00000016303, ENSSSCT00000039662, ENSSSCT00000043130, ENSSSCT00000045844, ENSSSCT00000058838, ENSSSCT00000065421, XM_021062640, XM_021062641, XM_021062642, XM_021062643, XM_021062644, XM_021062645, XM_021062646, XM_021062648, XM_021062649, XM_021062650, XM_021062651, XM_021062652, XM_021062653, XM_021062654, XM_021062655, XM_021062656, XM_021062657, XM_021062659, XM_021062660, XM_021062661,…	9:26154912-26167298:-1	TATA-box binding protein associated factor, RNA polymerase I subunit D	Cluster001
TAF2	580	ENSSSCG00000006000	ENSSSCT00000006583, ENSSSCT00000033583, ENSSSCT00000035390, ENSSSCT00000055155, ENSSSCT00000061987, XM_021090551	4:19161226-19276501:+1	TATA-box binding protein associated factor 2	Cluster001
TAF9	19	ENSSSCG00000038615	ENSSSCT00000038742, ENSSSCT00000043331, XM_003359799	16:47494669-47499492:-1	TATA-box binding protein associated factor 9	Cluster001
TAF9B	97	ENSSSCG00000026714	ENSSSCT00000023290, ENSSSCT00000029310, ENSSSCT00000050614, ENSSSCT00000052639, ENSSSCT00000065816, XM_013986250, XM_013986251	X:62212657-62229026:-1	TATA-box binding protein associated factor 9b	Cluster001
TAOK1	579	ENSSSCG00000017790	ENSSSCT00000019362, XM_003483075	12:45597002-45744809:+1	TAO kinase 1	Cluster001
TAOK3	701	ENSSSCG00000009850	ENSSSCT00000010796, ENSSSCT00000044596, ENSSSCT00000060632, XM_001924400, XM_021073055	14:34322027-34514362:+1	TAO kinase 3	Cluster001
TARS	149	ENSSSCG00000016817	ENSSSCT00000018310, XM_021076644	16:19455124-19486719:+1	threonyl-tRNA synthetase	Cluster001
TBC1D23	289	ENSSSCG00000030486	ENSSSCT00000030794, ENSSSCT00000040945, XM_021071307, XM_021071308	13:158665077-158729282:-1	TBC1 domain family member 23	Cluster001
TBC1D31	149	ENSSSCG00000005987	ENSSSCT00000006570, ENSSSCT00000025217, ENSSSCT00000041765, ENSSSCT00000042108, ENSSSCT00000043801, ENSSSCT00000044289, ENSSSCT00000054858, ENSSSCT00000061971, ENSSSCT00000062974, ENSSSCT00000064984, XM_013996507, XM_021088959, XM_021088960, XM_021088961, XM_021088962, XM_021088963, XM_021088964, XM_021088965, XM_021088966, XM_021088967, XM_021088968, XM_021088971	4:16212553-16288167:-1	TBC1 domain family member 31	Cluster001
TBC1D32	202	ENSSSCG00000004242	ENSSSCT00000004689, ENSSSCT00000041262, ENSSSCT00000060707, XM_001926894, XM_013988502, XM_021088926, XM_021088930, XM_021088940, XM_021088942	1:41057291-41263561:+1	TBC1 domain family member 32	Cluster001
TBCCD1	14	ENSSSCG00000011797	ENSSSCT00000012909, ENSSSCT00000055755, ENSSSCT00000060953, ENSSSCT00000066258, XM_005652362, XM_005652366, XM_021068227, XM_021068228, XM_021068229	13:124363457-124388392:-1	TBCC domain containing 1	Cluster001
TBL1XR1	895	ENSSSCG00000011760	ENSSSCT00000012871, ENSSSCT00000028290, ENSSSCT00000038018, ENSSSCT00000038564, ENSSSCT00000047161, ENSSSCT00000056472, ENSSSCT00000057255, ENSSSCT00000058021, ENSSSCT00000058149, ENSSSCT00000063961, XM_003132542, XM_021071196, XM_021071197, XM_021071199, XM_021071200, XM_021071202, XM_021071205, XM_021071207, XM_021071208, XM_021071210, XM_021071211	13:115311025-115488354:-1	transducin beta like 1 X-linked receptor 1	Cluster001
TBR1	205	ENSSSCG00000015891	ENSSSCT00000017303, XM_001928598	15:68213679-68224281:+1	T-box, brain 1	Cluster001
TCAF1	538	ENSSSCG00000016453	ENSSSCT00000017916, ENSSSCT00000048067, ENSSSCT00000051943, ENSSSCT00000053599, ENSSSCT00000062223	18:6475398-6623197:+1	TRPM8 channel-associated factor 1	Cluster001
TCEAL4	645	.	XM_003135283, XM_005657895	.	transcription elongation factor A like 4	Cluster001
TCERG1	733	ENSSSCG00000014416	ENSSSCT00000015755, ENSSSCT00000064480, XM_003354339	2:147792034-147852461:+1	transcription elongation regulator 1	Cluster001
TCF20	68	ENSSSCG00000032171	ENSSSCT00000054013, XM_021091435	5:6484401-6533733:+1	transcription factor 20	Cluster001
TCF4	670	ENSSSCG00000004535	ENSSSCT00000005009, ENSSSCT00000036325, ENSSSCT00000036505, ENSSSCT00000042622, ENSSSCT00000046376, ENSSSCT00000046813, ENSSSCT00000053584, ENSSSCT00000061115, ENSSSCT00000065036, XM_021093431, XM_021093435, XM_021093439, XM_021093441, XM_021093443, XM_021093445, XM_021093448, XM_021093452, XM_021093460, XM_021093476, XM_021093481, XM_021093484, XM_021093491, XM_021093496, XM_021093499, XM_021093…	1:104715777-105079919:-1	transcription factor 4	Cluster001
TDG	675	ENSSSCG00000000847	ENSSSCT00000000924, XM_021092634	5:80437959-80492252:-1	thymine DNA glycosylase	Cluster001
TDRD12	170	.	XM_013988548, XM_021094274, XM_021094276, XM_021094277	.	tudor domain containing 12	Cluster001
TDRD3	575	ENSSSCG00000009449	ENSSSCT00000010359, ENSSSCT00000024660, XM_013980575, XM_021065650, XM_021065651	11:33258041-33440123:+1	tudor domain containing 3	Cluster001
TDRKH	16	ENSSSCG00000027770	ENSSSCT00000032144, ENSSSCT00000057560, XM_013997124	4:97415891-97438522:+1	tudor and KH domain containing	Cluster001
TEC	187	ENSSSCG00000008820	ENSSSCT00000009650, XM_003128960, XM_013978655, XM_013978657, XM_021101172, XM_021101173	8:38051061-38181874:-1	tec protein tyrosine kinase	Cluster001
TENM1	315	ENSSSCG00000012644	ENSSSCT00000013825, ENSSSCT00000041439	X:101823478-102206241:-1	teneurin transmembrane protein 1	Cluster001
TENM3	411	ENSSSCG00000015774	ENSSSCT00000017175, ENSSSCT00000022975, ENSSSCT00000026310, ENSSSCT00000043150, ENSSSCT00000056073, XM_021076353, XM_021076354, XM_021076355, XM_021076356, XM_021076357, XM_021076358, XM_021076359, XM_021076361, XM_021076362, XM_021076363, XM_021076364, XM_021076365, XM_021076366, XM_021076367, XM_021076368, XM_021076369, XM_021076370, XM_021076374, XM_021076375	15:44066193-44407632:+1	teneurin transmembrane protein 3	Cluster001
TET2	50	ENSSSCG00000009157	ENSSSCT00000010028, ENSSSCT00000038037, ENSSSCT00000046452, ENSSSCT00000049129, XM_013978993	8:116415272-116545514:-1	tet methylcytosine dioxygenase 2	Cluster001
TEX10	291	ENSSSCG00000005389	ENSSSCT00000005932, ENSSSCT00000039346, ENSSSCT00000063565, XM_001925941	1:242058041-242120675:-1	testis expressed 10	Cluster001
TFCP2	413	ENSSSCG00000031206	ENSSSCT00000061563, XM_021081711, XM_021081712, XM_021081713	AEMK02000258.1:226608-290224:+1	transcription factor CP2	Cluster001
TFDP1	372	ENSSSCG00000009560	ENSSSCT00000010480, ENSSSCT00000051865, ENSSSCT00000065259, XM_021065985, XM_021065986	11:78755532-78783810:+1	transcription factor Dp-1	Cluster001
TFPI	25	ENSSSCG00000016032	ENSSSCT00000017457, ENSSSCT00000040738, XM_005672009, XM_013984326, XM_013984328, XM_013984329, XM_021074527	15:92344837-92409986:-1	tissue factor pathway inhibitor	Cluster001
TGS1	190	ENSSSCG00000006251	ENSSSCT00000006850, ENSSSCT00000032365, XM_001927876	4:75937129-75969160:-1	trimethylguanosine synthase 1	Cluster001
THAP1	226	ENSSSCG00000039969	ENSSSCT00000050531, ENSSSCT00000053327, XM_003359869	17:11765149-11773291:-1	THAP domain containing 1	Cluster001
THAP12	515	.	XM_021062533	.	THAP domain containing 12	Cluster001
THOC1	257	ENSSSCG00000025653	ENSSSCT00000029403, ENSSSCT00000041337, XM_021096157, XM_021096158	6:106039898-106091689:+1	THO complex 1	Cluster001
THOC2	434	ENSSSCG00000012639	ENSSSCT00000013820, ENSSSCT00000040325, ENSSSCT00000045808, ENSSSCT00000055062, ENSSSCT00000060332, XM_013986394, XM_013986395, XM_013986396, XM_021080460, XM_021080461, XM_021080462, XM_021080463, XM_021080464, XM_021080465, XM_021080466, XM_021080467, XM_021080468, XM_021080469	X:101171362-101285370:-1	THO complex 2	Cluster001
THOC3	164	ENSSSCG00000014061	ENSSSCT00000015360, XM_003123664	2:81658759-81682670:+1	THO complex 3	Cluster001
THOC7	86	ENSSSCG00000011491	ENSSSCT00000012574, ENSSSCT00000043715, XM_003132293, XM_013981843, XM_013981844, XM_021069184, XM_021069185, XM_021069186	13:45334029-45356079:-1	THO complex 7	Cluster001
THUMPD3	86	ENSSSCG00000011542	ENSSSCT00000012632, ENSSSCT00000058011, XM_021071098, XM_021071099, XM_021071100, XM_021071101, XM_021071102, XM_021071104	13:65721470-65749299:+1	THUMP domain containing 3	Cluster001
TIAM2	129	ENSSSCG00000004065	ENSSSCT00000004494, ENSSSCT00000023199, ENSSSCT00000027128, ENSSSCT00000039486, ENSSSCT00000057926, ENSSSCT00000064337, XM_005659127, XM_021071952, XM_021071955, XM_021071956, XM_021071960, XM_021071964, XM_021071979	1:11648507-11799068:-1	T-cell lymphoma invasion and metastasis 2	Cluster001
TIGD7	109	ENSSSCG00000037309	ENSSSCT00000060893	3:38893694-38900332:+1	tigger transposable element derived 7	Cluster001
TIPIN	593	ENSSSCG00000004942	ENSSSCT00000005454, ENSSSCT00000055656, XM_001925231, XM_013993315, XM_021100289	1:164349193-164369643:-1	TIMELESS interacting protein	Cluster001
TIPRL	634	ENSSSCG00000006301	ENSSSCT00000006906, ENSSSCT00000059290, ENSSSCT00000061286, XM_001928523, XM_021089446, XM_021089447, XM_021089448	4:82757472-82794553:-1	TOR signaling pathway regulator	Cluster001
TKTL2	77	ENSSSCG00000026079	ENSSSCT00000026422, XM_013978706	8:52326545-52328412:-1	transketolase like 2	Cluster001
TLE3	343	ENSSSCG00000004971	ENSSSCT00000005483, ENSSSCT00000005484, XM_021100713, XM_021100719, XM_021100726, XM_021100730, XM_021100733, XM_021100738, XM_021100747, XM_021100758, XM_021100772, XM_021100779, XM_021100790	1:167808509-167855819:-1	transducin like enhancer of split 3	Cluster001
TLK2	440	ENSSSCG00000017301	ENSSSCT00000018837, ENSSSCT00000041301, ENSSSCT00000041446, ENSSSCT00000048621, ENSSSCT00000049337, ENSSSCT00000061479, ENSSSCT00000062575, XM_021068144, XM_021068147, XM_021068148, XM_021068151	12:16129248-16275679:-1	tousled like kinase 2	Cluster001
TMCC1	148	ENSSSCG00000011593	ENSSSCT00000012689, ENSSSCT00000029276, ENSSSCT00000041022, ENSSSCT00000048493, ENSSSCT00000049448	13:69036428-69290104:-1	transmembrane and coiled-coil domain family 1	Cluster001
TMEM108	104	ENSSSCG00000011635	ENSSSCT00000012734, ENSSSCT00000043945, XM_005669840	13:74537871-74554629:+1	transmembrane protein 108	Cluster001
TMEM131	7	ENSSSCG00000008192	ENSSSCT00000008971, ENSSSCT00000049203, ENSSSCT00000049439, ENSSSCT00000058227, XM_021087244, XM_021087245, XM_021087247, XM_021087249, XM_021087250, XM_021087251, XM_021087252, XM_021087253, XM_021087254	3:56277141-56470259:+1	transmembrane protein 131	Cluster001
TMEM150C	136	ENSSSCG00000026729	ENSSSCT00000031641, ENSSSCT00000031997, ENSSSCT00000061629, ENSSSCT00000064040, XM_003357106, XM_005653621, XM_013998506, XM_013998514, XM_021101872, XM_021101873	8:135687748-135765936:+1	transmembrane protein 150C	Cluster001
TMEM183A	241	.	XM_021102013	.	transmembrane protein 183A	Cluster001
TMEM200C	1	ENSSSCG00000039627	ENSSSCT00000060527, XM_021096085	6:101214902-101216782:+1	transmembrane protein 200C	Cluster001
TMEM209	7	ENSSSCG00000016563	ENSSSCT00000018033, ENSSSCT00000026455, ENSSSCT00000038209, XM_005673176	18:18615258-18644708:+1	transmembrane protein 209	Cluster001
TMEM249	1	ENSSSCG00000005910	ENSSSCT00000006490, XM_005662816	4:428734-430281:+1	transmembrane protein 249	Cluster001
TMEM63B	505	ENSSSCG00000001697	ENSSSCT00000001896, ENSSSCT00000036360, ENSSSCT00000038739, ENSSSCT00000039005, XM_001929553, XM_013977979, XM_021098785, XM_021098786, XM_021098787	7:39137758-39166617:+1	transmembrane protein 63B	Cluster001
TMEM9	28	ENSSSCG00000027928	ENSSSCT00000030452, ENSSSCT00000036783, ENSSSCT00000049602, XM_003357666, XM_021064506	10:23583623-23600097:-1	transmembrane protein 9	Cluster001
TMOD2	161	ENSSSCG00000004628	ENSSSCT00000005111, ENSSSCT00000049208, ENSSSCT00000050687, ENSSSCT00000064841, XM_013992992, XM_021095391	1:119956596-120009372:-1	tropomodulin 2	Cluster001
TMOD3	73	ENSSSCG00000004626	ENSSSCT00000005109, ENSSSCT00000044323, ENSSSCT00000059120	1:119857427-119994762:-1	tropomodulin 3	Cluster001
TNIK	534	ENSSSCG00000028905	ENSSSCT00000024139, ENSSSCT00000030826, ENSSSCT00000041847, ENSSSCT00000055440, ENSSSCT00000056995, XM_021071151, XM_021071152, XM_021071154, XM_021071155, XM_021071156, XM_021071157, XM_021071158, XM_021071159, XM_021071160, XM_021071162, XM_021071163, XM_021071164, XM_021071165, XM_021071166, XM_021071167, XM_021071168, XM_021071169, XM_021071170, XM_021071171	13:109643895-110052259:-1	TRAF2 and NCK interacting kinase	Cluster001
TNPO1	323	ENSSSCG00000027293	ENSSSCT00000026046, ENSSSCT00000052539, XM_003359811, XM_021076714	16:49048679-49151926:+1	transportin 1	Cluster001
TNPO3	405	ENSSSCG00000016572	ENSSSCT00000018042, ENSSSCT00000052750, ENSSSCT00000055796, ENSSSCT00000056092, XM_013990808, XM_021079117	18:19554894-19673163:+1	transportin 3	Cluster001
TNRC6A	126	ENSSSCG00000038870	ENSSSCT00000037676, ENSSSCT00000040546, ENSSSCT00000040687, ENSSSCT00000042519, ENSSSCT00000045367, ENSSSCT00000047880, ENSSSCT00000049514, ENSSSCT00000057934, XM_021081315, XM_021081316, XM_021081317, XM_021081319, XM_021081320, XM_021081321, XM_021081322, XM_021081323, XM_021081324, XM_021081325, XM_021081326, XM_021081330, XM_021081334, XM_021081335, XM_021081336, XM_021081339	AEMK02000510.1:580337-823839:-1	trinucleotide repeat containing 6A	Cluster001
TOP2B	509	ENSSSCG00000011213	ENSSSCT00000012279	13:12508063-12575042:-1	DNA topoisomerase II beta	Cluster001
TOPBP1	192	ENSSSCG00000021966	ENSSSCT00000023340, ENSSSCT00000023415, ENSSSCT00000026732, ENSSSCT00000044655, XM_005669847, XM_021069465, XM_021069466, XM_021069467, XM_021069468	13:74766604-74846793:-1	topoisomerase (DNA) II binding protein 1	Cluster001
TOPORS	197	ENSSSCG00000011004	ENSSSCT00000012046, ENSSSCT00000038964, XM_005668076, XM_013980194	10:33866433-33879141:+1	TOP1 binding arginine/serine rich protein	Cluster001
TOX	190	ENSSSCG00000006235	ENSSSCT00000006832, ENSSSCT00000031500, ENSSSCT00000047129, ENSSSCT00000065833, XM_021089344	4:73810196-74112066:+1	thymocyte selection associated high mobility group box	Cluster001
TOX3	89	ENSSSCG00000002835	ENSSSCT00000003136, ENSSSCT00000052965, XM_021094179, XM_021094180, XM_021094181	6:32434800-32608693:+1	TOX high mobility group box family member 3	Cluster001
TP53BP1	214	ENSSSCG00000031949	ENSSSCT00000039043, ENSSSCT00000048296, ENSSSCT00000055830, ENSSSCT00000057371, ENSSSCT00000060247, XM_021096939, XM_021096946, XM_021096957	1:127958495-128028914:+1	tumor protein p53 binding protein 1	Cluster001
TP53INP1	1	ENSSSCG00000034321	ENSSSCT00000048692, ENSSSCT00000052801, ENSSSCT00000059631, XM_003355019, XM_013996595	4:41747673-41766688:+1	tumor protein p53 inducible nuclear protein 1	Cluster001
TPM3	697	ENSSSCG00000006556	ENSSSCT00000007182, ENSSSCT00000007183, ENSSSCT00000040499, ENSSSCT00000058770, XM_005663358, XM_005663360, XM_005663361, XM_005663362, XM_005663363, XM_005663366, XM_005663367, XM_005663370, XM_005663371, XM_005663372, XM_005663373, XM_005663374, XM_005663376, XM_013997044, XM_021088728, XM_021088729, XM_021088730, XM_021088732, XM_021088733, XM_021088734	4:95542324-95573009:+1	tropomyosin 3	Cluster001
TPR	592	ENSSSCG00000015576	ENSSSCT00000016969, ENSSSCT00000056338, XM_013977898, XM_021063816	9:127481827-127540790:-1	translocated promoter region, nuclear basket protein	Cluster001
TRAF4	257	ENSSSCG00000032658	ENSSSCT00000050739, XM_021067485	12:44975647-44985746:+1	TNF receptor associated factor 4	Cluster001
TRAFD1	161	ENSSSCG00000009886	ENSSSCT00000010836	14:39549851-39579781:-1	TRAF-type zinc finger domain containing 1	Cluster001
TRAK1	91	ENSSSCG00000011278	ENSSSCT00000012347, ENSSSCT00000039992, ENSSSCT00000042902, ENSSSCT00000044017, ENSSSCT00000046284, ENSSSCT00000048144, ENSSSCT00000050335, ENSSSCT00000051119, ENSSSCT00000053519, ENSSSCT00000054966, XM_003132130, XM_003358385, XM_021071686, XM_021071687, XM_021071688, XM_021071689, XM_021071690, XM_021071691, XM_021071693, XM_021071695, XM_021071697, XM_021071699, XM_021071700	13:25774007-25934767:+1	trafficking kinesin protein 1	Cluster001
TRAPPC8	410	ENSSSCG00000003728	ENSSSCT00000004127, ENSSSCT00000004128, ENSSSCT00000042677, ENSSSCT00000065819, XM_021096211, XM_021096212	6:115694899-115787035:-1	trafficking protein particle complex 8	Cluster001
TRIM2	199	ENSSSCG00000029200	ENSSSCT00000009865, ENSSSCT00000026657, ENSSSCT00000039462, ENSSSCT00000043428, ENSSSCT00000044920, ENSSSCT00000046517, ENSSSCT00000056707, ENSSSCT00000065254, XM_013998053, XM_013998057, XM_013998059, XM_013998064, XM_013998067, XM_013998072, XM_013998074, XM_013998076, XM_013998079, XM_013998082, XM_013998086, XM_021101488, XM_021101489, XM_021101491, XM_021101492, XM_021101495, XM_021101496, X…	8:75770347-75963092:-1	tripartite motif containing 2	Cluster001
TRIM24	506	ENSSSCG00000016518	ENSSSCT00000017986, ENSSSCT00000039916, XM_021079186, XM_021079188, XM_021079189	18:11055213-11234156:-1	tripartite motif containing 24	Cluster001
TRIM27	209	ENSSSCG00000001219	ENSSSCT00000001317, ENSSSCT00000033899, ENSSSCT00000035675, XM_003128235	AEMK02000264.1:139243-157845:+1	tripartite motif containing 27	Cluster001
TRIM33	905	ENSSSCG00000006757	ENSSSCT00000007402, ENSSSCT00000022292, ENSSSCT00000029002, XM_021090006, XM_021090007, XM_021090008	4:106058103-106191800:+1	tripartite motif containing 33	Cluster001
TRIM44	33	ENSSSCG00000013295	ENSSSCT00000014520, ENSSSCT00000045333, XM_003122865, XM_005660994	2:25272622-25378733:-1	tripartite motif containing 44	Cluster001
TRIM62	300	ENSSSCG00000003620	ENSSSCT00000004016, ENSSSCT00000052798, XM_003127763	6:89404096-89442896:-1	tripartite motif containing 62	Cluster001
TRIM67	663	ENSSSCG00000010177	ENSSSCT00000011143, ENSSSCT00000061550, XM_021072335	14:59267345-59302392:-1	tripartite motif containing 67	Cluster001
TRIO	664	ENSSSCG00000016781	ENSSSCT00000018268, XM_021077141, XM_021077142, XM_021077143	16:3563660-3919737:+1	trio Rho guanine nucleotide exchange factor	Cluster001
TRIP11	140	ENSSSCG00000002445	ENSSSCT00000002715, ENSSSCT00000038260, ENSSSCT00000044128, ENSSSCT00000056353, XM_021099622	7:113525678-113600581:-1	thyroid hormone receptor interactor 11	Cluster001
TRIP13	95	ENSSSCG00000034522	ENSSSCT00000045068, XM_021076539	16:79458603-79473727:-1	thyroid hormone receptor interactor 13	Cluster001
TRMT10A	105	ENSSSCG00000009180	ENSSSCT00000010053, XM_005653613, XM_013998376, XM_013998382, XM_021100343	8:120885833-120917350:+1	tRNA methyltransferase 10A	Cluster001
TRMT10B	1	ENSSSCG00000005354	ENSSSCT00000005894, ENSSSCT00000044620, XM_001928975, XM_013993673, XM_021066232	1:238516042-238537149:+1	tRNA methyltransferase 10B	Cluster001
TRMT1L	175	ENSSSCG00000021393	ENSSSCT00000029214, ENSSSCT00000049159, XM_021102636	9:126302340-126392551:-1	tRNA methyltransferase 1 like	Cluster001
TRMT5	563	ENSSSCG00000024529	ENSSSCT00000027040, ENSSSCT00000058749, XM_013993474	1:189914786-189923194:-1	tRNA methyltransferase 5	Cluster001
TRMT6	267	ENSSSCG00000007046	ENSSSCT00000007715, XM_001927396, XM_005672681	17:14775494-14965130:-1	tRNA methyltransferase 6	Cluster001
TRPA1	250	ENSSSCG00000006186	ENSSSCT00000006780, ENSSSCT00000028735, ENSSSCT00000045115, XM_001926115, XM_021089237, XM_021089238	4:63440664-63558849:+1	transient receptor potential cation channel subfamily A member 1	Cluster001
TRPC4	203	ENSSSCG00000009362	ENSSSCT00000010259, XM_021065110, XM_021065111	11:13300556-13517568:-1	transient receptor potential cation channel subfamily C member 4	Cluster001
TRPC5	12	ENSSSCG00000012587	ENSSSCT00000013766, XM_005673829	X:91724620-91880064:-1	transient receptor potential cation channel subfamily C member 5	Cluster001
TRPC6	71	ENSSSCG00000024022	ENSSSCT00000024893, XM_003357256, XM_021062700, XM_021062701	9:32348438-32439187:-1	transient receptor potential cation channel subfamily C member 6	Cluster001
TRPM7	94	ENSSSCG00000004636	ENSSSCT00000005121, ENSSSCT00000050675, ENSSSCT00000055327, ENSSSCT00000059656, ENSSSCT00000064891, XM_003121515, XM_013993003, XM_021095609	1:121145857-121250211:+1	transient receptor potential cation channel subfamily M member 7	Cluster001
TSEN2	9	ENSSSCG00000011580	ENSSSCT00000012673, ENSSSCT00000029848, ENSSSCT00000050738, XM_003132372, XM_005669795, XM_013981990	13:68467860-68520720:+1	tRNA splicing endonuclease subunit 2	Cluster001
TSGA10	166	ENSSSCG00000008186	ENSSSCT00000008965, ENSSSCT00000043754, ENSSSCT00000050133, ENSSSCT00000056012, ENSSSCT00000061941, ENSSSCT00000066153, XM_021087199, XM_021087200, XM_021087201, XM_021087203, XM_021087204, XM_021087205, XM_021087206, XM_021087207, XM_021087208, XM_021087209	3:55180731-55323490:+1	testis specific 10	Cluster001
TSHZ3	407	ENSSSCG00000025214	ENSSSCT00000028743	6:41347116-41350148:-1	teashirt zinc finger homeobox 3	Cluster001
TSPAN2	490	ENSSSCG00000006748	ENSSSCT00000007393, ENSSSCT00000056235, ENSSSCT00000056862, XM_001927979, XM_021089999	4:105502552-105542134:+1	tetraspanin 2	Cluster001
TSR1	81	ENSSSCG00000038534	ENSSSCT00000058795, XM_021067603, XM_021067604	12:48404292-48416701:-1	TSR1, ribosome maturation factor	Cluster001
TSTD2	22	ENSSSCG00000005367	ENSSSCT00000005907, ENSSSCT00000027470, ENSSSCT00000053875, XM_003122024, XM_005660259, XM_005660260, XM_005660262, XM_005660263, XM_005660264, XM_013993681, XM_013993682, XM_013993683, XM_021066314, XM_021066327, XM_021066332, XM_021066335	1:239466589-239492883:-1	thiosulfate sulfurtransferase like domain containing 2	Cluster001
TTC13	723	ENSSSCG00000010180	ENSSSCT00000011146, ENSSSCT00000040508, ENSSSCT00000041953, ENSSSCT00000042973, ENSSSCT00000048649, ENSSSCT00000049003, ENSSSCT00000051301, ENSSSCT00000058902, XM_001926644, XM_005652418, XM_005652419, XM_013993736, XM_013993802, XM_013993824, XM_021073608	14:59409123-59491962:+1	tetratricopeptide repeat domain 13	Cluster001
TTC14	138	ENSSSCG00000011767	ENSSSCT00000012878, ENSSSCT00000060925, XM_001927185, XM_013982230	13:118614387-118625221:+1	tetratricopeptide repeat domain 14	Cluster001
TTC17	382	ENSSSCG00000013284	ENSSSCT00000014508, ENSSSCT00000053928, ENSSSCT00000058710, ENSSSCT00000061124, XM_003480706	2:18807530-18954667:-1	tetratricopeptide repeat domain 17	Cluster001
TTC19	256	ENSSSCG00000023747	ENSSSCT00000019633, ENSSSCT00000031618, ENSSSCT00000049565, XM_021066288	12:59392182-59418796:-1	tetratricopeptide repeat domain 19	Cluster001
TTC21B	168	ENSSSCG00000015908	ENSSSCT00000017321, ENSSSCT00000017322, ENSSSCT00000030496, ENSSSCT00000038484, ENSSSCT00000049996, ENSSSCT00000052558, ENSSSCT00000059662, XM_021074791	15:72430726-72512852:-1	tetratricopeptide repeat domain 21B	Cluster001
TTC25	365	ENSSSCG00000017415	ENSSSCT00000018959, ENSSSCT00000040141, XM_021066985, XM_021066986, XM_021066987, XM_021066989, XM_021066990	12:20767012-20791510:-1	tetratricopeptide repeat domain 25	Cluster001
TTC26	32	ENSSSCG00000016511	ENSSSCT00000017977, ENSSSCT00000037886, ENSSSCT00000057927, ENSSSCT00000058067, XM_003134620	18:10462669-10509567:-1	tetratricopeptide repeat domain 26	Cluster001
TTC27	256	ENSSSCG00000008512	ENSSSCT00000009315, XM_021087655	3:106822395-106999390:-1	tetratricopeptide repeat domain 27	Cluster001
TTC28	282	ENSSSCG00000009968	ENSSSCT00000010924, ENSSSCT00000026589, XM_021074051	14:45321542-45493532:-1	tetratricopeptide repeat domain 28	Cluster001
TTC3	601	ENSSSCG00000012062	ENSSSCT00000013194, ENSSSCT00000038292, ENSSSCT00000058719, XM_021070969	13:200694616-200821912:+1	tetratricopeptide repeat domain 3	Cluster001
TTC4	253	ENSSSCG00000003844	ENSSSCT00000004256, ENSSSCT00000040205, ENSSSCT00000041110, XM_003127973	6:157615712-157651740:-1	tetratricopeptide repeat domain 4	Cluster001
TTLL1	375	ENSSSCG00000000035	ENSSSCT00000000037, ENSSSCT00000053033, ENSSSCT00000066398, XM_003481524, XM_003481525, XM_021091413, XM_021091414, XM_021091415, XM_021091416, XM_021091418	5:5793781-5831302:+1	tubulin tyrosine ligase like 1	Cluster001
TUBA1A	754	.	XM_005655549	.	tubulin alpha 1a	Cluster001
TUBB	715	ENSSSCG00000001379	ENSSSCT00000001098, ENSSSCT00000001501	7:23248027-23294218:+1	tubulin beta class I	Cluster001
TUBB2B	284	ENSSSCG00000033655	ENSSSCT00000037872, ENSSSCT00000038258, ENSSSCT00000040472, ENSSSCT00000041293, ENSSSCT00000045032, ENSSSCT00000045442, ENSSSCT00000046321, ENSSSCT00000049131, ENSSSCT00000061609, ENSSSCT00000064196	7:1908195-1955951:-1	tubulin beta-2A chain	Cluster001
TUBE1	227	ENSSSCG00000004423	ENSSSCT00000004888, XM_013992758, XM_021091358	1:78018433-78048438:-1	tubulin epsilon 1	Cluster001
TUBGCP4	467	ENSSSCG00000004708	ENSSSCT00000005200, ENSSSCT00000052259, XM_001926011, XM_021096979	1:128029406-128084044:-1	tubulin gamma complex associated protein 4	Cluster001
TULP3	59	ENSSSCG00000000737	ENSSSCT00000000801, ENSSSCT00000040316, XM_013997835	5:67201685-67238330:-1	tubby like protein 3	Cluster001
TULP4	20	ENSSSCG00000031776	ENSSSCT00000050178, XM_021086385	1:8655450-8823128:-1	tubby like protein 4	Cluster001
TWF1	59	ENSSSCG00000000798	ENSSSCT00000000865, ENSSSCT00000038078, ENSSSCT00000040799, ENSSSCT00000045088	5:74868591-74893713:-1	twinfilin actin binding protein 1	Cluster001
TWISTNB	411	ENSSSCG00000025298	ENSSSCT00000030736	9:88760398-88785827:-1	TWIST neighbor	Cluster001
TXLNG	97	.	XM_003134955, XM_013985941	.	taxilin gamma	Cluster001
TXNL1	633	ENSSSCG00000004537	ENSSSCT00000005011, ENSSSCT00000037709, ENSSSCT00000038773, ENSSSCT00000059773, XM_013985373	1:105973628-106013521:-1	thioredoxin like 1	Cluster001
U2SURP	736	ENSSSCG00000011684	ENSSSCT00000012792, ENSSSCT00000051826, ENSSSCT00000055076, XM_013982107, XM_013982108, XM_021069579, XM_021069580, XM_021069582, XM_021069583, XM_021069584, XM_021069585	13:83704576-83759969:+1	U2 snRNP associated SURP domain containing	Cluster001
UAP1	84	ENSSSCG00000006340	ENSSSCT00000006948, ENSSSCT00000037237, XM_001928643, XM_005663149, XM_005663152, XM_021089502	4:87960063-87993973:-1	UDP-N-acetylglucosamine pyrophosphorylase 1	Cluster001
UBA3	145	.	XM_001924377, XM_003358496, XM_013981879, XM_021069201, XM_021069202	.	ubiquitin like modifier activating enzyme 3	Cluster001
UBALD2	563	ENSSSCG00000023423	ENSSSCT00000026568, XM_003357957, XM_005656922	12:5203195-5208679:-1	UBA like domain containing 2	Cluster001
UBAP2	317	ENSSSCG00000010987	ENSSSCT00000012026, ENSSSCT00000058074, ENSSSCT00000059696, XM_005668066, XM_013980175, XM_013980178, XM_021064690, XM_021064691, XM_021064692, XM_021064693, XM_021064694, XM_021064695, XM_021064696, XM_021064698, XM_021064699	10:32755978-32892869:+1	ubiquitin associated protein 2	Cluster001
UBAP2L	357	ENSSSCG00000006553	ENSSSCT00000007178, ENSSSCT00000027198, ENSSSCT00000028059, ENSSSCT00000044373, ENSSSCT00000047263, ENSSSCT00000047273, XM_003125728, XM_005663381, XM_005663382, XM_005663391, XM_013997059, XM_013997060, XM_013997064, XM_013997065, XM_013997066, XM_013997067, XM_013997069, XM_013997070, XM_013997072, XM_013997073, XM_013997074, XM_013997077, XM_013997078, XM_013997079, XM_021089759, XM_021089760,…	4:95471131-95697954:-1	ubiquitin associated protein 2 like	Cluster001
UBE2D3	118	ENSSSCG00000035622	ENSSSCT00000010037, ENSSSCT00000010039, ENSSSCT00000040260, ENSSSCT00000045236, ENSSSCT00000048429, ENSSSCT00000060344, ENSSSCT00000065206	8:118202795-118233296:+1	ubiquitin conjugating enzyme E2 D3	Cluster001
UBE2D4	4	ENSSSCG00000016722	ENSSSCT00000018203, XM_003134861, XM_013985795	18:48736162-48748715:-1	ubiquitin conjugating enzyme E2 D4 (putative)	Cluster001
UBE2J1	392	ENSSSCG00000004317	ENSSSCT00000004773, ENSSSCT00000053230	1:57337082-57364621:-1	ubiquitin conjugating enzyme E2 J1	Cluster001
UBE2Q2	27	.	XM_021099009, XM_021099010	.	ubiquitin conjugating enzyme E2 Q2	Cluster001
UBE2QL1	219	ENSSSCG00000035825	ENSSSCT00000045620, XM_021076776	16:75424872-75474043:-1	ubiquitin conjugating enzyme E2 Q family like 1	Cluster001
UBE2V2	430	ENSSSCG00000022190	ENSSSCT00000026021	4:79620918-79652486:-1	ubiquitin conjugating enzyme E2 V2	Cluster001
UBE3A	472	ENSSSCG00000004832	ENSSSCT00000005334, ENSSSCT00000047902, ENSSSCT00000048664, ENSSSCT00000059702, ENSSSCT00000063766, ENSSSCT00000064743, XM_005652466, XM_013999067, XM_021075796, XM_021075846, XM_021075905, XM_021075965, XM_021076036, XM_021076100, XM_021076243, XM_021076297, XM_021076371, XM_021076429, XM_021076482	1:141887132-141986547:+1	ubiquitin protein ligase E3A	Cluster001
UBN2	44	ENSSSCG00000016510	ENSSSCT00000017975, ENSSSCT00000052833, ENSSSCT00000053236, ENSSSCT00000062255, XM_003360116, XM_013990786, XM_021079092	18:10381234-10451978:-1	ubinuclein 2	Cluster001
UBP1	371	ENSSSCG00000011235	ENSSSCT00000012302, ENSSSCT00000050090, XM_003132094, XM_021071558	13:19203954-19276418:-1	upstream binding protein 1 (LBP-1a)	Cluster001
UBR1	70	ENSSSCG00000004717	ENSSSCT00000005209, ENSSSCT00000032277, ENSSSCT00000046627, XM_021097091, XM_021097096, XM_021097103	1:128319311-128474302:+1	ubiquitin protein ligase E3 component n-recognin 1	Cluster001
UBR5	395	ENSSSCG00000022479	ENSSSCT00000022974, ENSSSCT00000023965, ENSSSCT00000033532, ENSSSCT00000035758, ENSSSCT00000064677, XM_021089030, XM_021089031, XM_021089032, XM_021089033, XM_021089034, XM_021089035, XM_021089036, XM_021089037, XM_021089038, XM_021089039	4:34645809-34794338:+1	ubiquitin protein ligase E3 component n-recognin 5	Cluster001
UBTD2	30	ENSSSCG00000023948	ENSSSCT00000032305, ENSSSCT00000050752, ENSSSCT00000057727, XM_021076606	16:51907488-51982659:+1	ubiquitin domain containing 2	Cluster001
UBTF	695	ENSSSCG00000017360	ENSSSCT00000018899, ENSSSCT00000039688, ENSSSCT00000050191, ENSSSCT00000053470, ENSSSCT00000058980, ENSSSCT00000063504, ENSSSCT00000064625, ENSSSCT00000066156, XM_021066871, XM_021066872, XM_021066873, XM_021066874, XM_021066875, XM_021066876, XM_021066877, XM_021066878, XM_021066879, XM_021066880, XM_021066881, XM_021066882, XM_021066883	12:18989828-19006929:+1	upstream binding transcription factor, RNA polymerase I	Cluster001
UBXN2B	198	ENSSSCG00000006239	ENSSSCT00000006837, ENSSSCT00000038223, ENSSSCT00000043032, XM_001924982	4:74404560-74438051:-1	UBX domain protein 2B	Cluster001
UBXN4	409	ENSSSCG00000015690	ENSSSCT00000017090, XM_021074795	15:16162655-16206207:-1	UBX domain protein 4	Cluster001
UBXN8	118	ENSSSCG00000015843	ENSSSCT00000017251, XM_021074602	15:54343019-54367596:-1	UBX domain protein 8	Cluster001
UCHL3	43	ENSSSCG00000009466	ENSSSCT00000010377, ENSSSCT00000046681, XM_021065167	11:47828818-47886455:+1	ubiquitin C-terminal hydrolase L3	Cluster001
UCKL1	29	.	XM_021077623, XM_021077625, XM_021077626, XM_021077627, XM_021077628, XM_021077629, XM_021077630, XM_021077631, XM_021077632, XM_021077633, XM_021077634, XM_021077635, XM_021077636, XM_021077637, XM_021077638, XM_021077639	.	uridine-cytidine kinase 1 like 1	Cluster001
UGGT2	17	ENSSSCG00000009502	ENSSSCT00000010419, XM_021065791, XM_021065792, XM_021065793	11:65307487-65477490:-1	UDP-glucose glycoprotein glucosyltransferase 2	Cluster001
UHRF2	357	ENSSSCG00000005201	ENSSSCT00000005733, ENSSSCT00000025343, ENSSSCT00000042261, ENSSSCT00000051331, ENSSSCT00000058986, XM_021063942, XM_021063944	1:215730219-215807674:-1	ubiquitin like with PHD and ring finger domains 2	Cluster001
UNC13A	517	.	XM_021083543, XM_021083544, XM_021083545, XM_021083546, XM_021083547, XM_021083548, XM_021083549, XM_021083550, XM_021083551, XM_021083552, XM_021083553, XM_021083554, XM_021083555	.	unc-13 homolog A	Cluster001
UNC5D	21	ENSSSCG00000015830	ENSSSCT00000017238, ENSSSCT00000041103, ENSSSCT00000045285, ENSSSCT00000062612, XM_021076126, XM_021076128, XM_021076129, XM_021076131, XM_021076132, XM_021076133, XM_021076134	15:50201405-50460534:-1	unc-5 netrin receptor D	Cluster001
UNC79	79	.	XM_021099632, XM_021099633, XM_021099634, XM_021099635, XM_021099636, XM_021099637, XM_021099638, XM_021099639, XM_021099640, XM_021099641, XM_021099642, XM_021099643, XM_021099644, XM_021099645, XM_021099646	.	unc-79 homolog (C. elegans)	Cluster001
UPF3A	302	ENSSSCG00000024679	ENSSSCT00000030947, ENSSSCT00000039077, ENSSSCT00000053117, ENSSSCT00000061733, XM_021065994, XM_021065995, XM_021065997, XM_021065998, XM_021066000	11:79118836-79136222:+1	UPF3 regulator of nonsense transcripts homolog A (yeast)	Cluster001
UPF3B	68	ENSSSCG00000012617	ENSSSCT00000013796, XM_003135341	X:98185094-98206093:-1	UPF3 regulator of nonsense transcripts homolog B (yeast)	Cluster001
UQCRB	216	.	XM_021088626, XM_021088627	.	ubiquinol-cytochrome c reductase binding protein	Cluster001
URI1	429	ENSSSCG00000025912	ENSSSCT00000026169	6:40043331-40110538:+1	URI1, prefoldin like chaperone	Cluster001
USF3	61	ENSSSCG00000011918	ENSSSCT00000013042, XM_005670202, XM_013982422, XM_021068421	13:146230185-146282335:+1	upstream transcription factor family member 3	Cluster001
USP15	519	ENSSSCG00000000457	ENSSSCT00000000493, ENSSSCT00000030942, XM_003126341, XM_003481646, XM_021091916, XM_021091917, XM_021091919, XM_021091920, XM_021091921, XM_021091922	5:26964788-27083336:+1	ubiquitin specific peptidase 15	Cluster001
USP16	429	ENSSSCG00000027594	ENSSSCT00000029188, ENSSSCT00000041577, ENSSSCT00000042400, ENSSSCT00000048155, ENSSSCT00000048627, ENSSSCT00000049324, ENSSSCT00000051816, ENSSSCT00000055730, ENSSSCT00000059910, ENSSSCT00000062487, XM_005670311, XM_005670312, XM_005670313, XM_005670314, XM_005670316, XM_005670317, XM_005670318, XM_005670319, XM_005670320, XM_005670321, XM_021070870, XM_021070872, XM_021070873, XM_021070875, XM_…	13:192376881-192406470:+1	ubiquitin specific peptidase 16	Cluster001
USP24	314	ENSSSCG00000029633	ENSSSCT00000024705, XM_021097812, XM_021097813, XM_021097814	6:157220602-157384366:+1	ubiquitin specific peptidase 24	Cluster001
USP34	200	ENSSSCG00000008382	ENSSSCT00000009178, ENSSSCT00000028791, ENSSSCT00000039215, ENSSSCT00000044987, ENSSSCT00000051906, XM_013996121, XM_021087489, XM_021087490, XM_021087491, XM_021087492, XM_021087493, XM_021087495, XM_021087496, XM_021087497, XM_021087498, XM_021087499, XM_021087501	3:80331838-80587365:+1	ubiquitin specific peptidase 34	Cluster001
USP37	209	ENSSSCG00000016194	ENSSSCT00000017635, ENSSSCT00000024409, ENSSSCT00000044371, ENSSSCT00000048145, ENSSSCT00000053346, XM_003133658, XM_005672197, XM_005672200, XM_013984488, XM_021076476	15:120492554-120590235:-1	ubiquitin specific peptidase 37	Cluster001
USP47	631	ENSSSCG00000013402	ENSSSCT00000014642, ENSSSCT00000047661, XM_021083314, XM_021083315, XM_021083316	2:47448122-47582838:-1	ubiquitin specific peptidase 47	Cluster001
USP48	479	ENSSSCG00000024197	ENSSSCT00000003906, ENSSSCT00000026724, XM_021097700, XM_021097701, XM_021097702, XM_021097703, XM_021097704	6:79744936-79810724:-1	ubiquitin specific peptidase 48	Cluster001
USP7	699	ENSSSCG00000007907	ENSSSCT00000008664, ENSSSCT00000060370	3:33753800-33810465:+1	ubiquitin specific peptidase 7	Cluster001
USP8	282	ENSSSCG00000004639	ENSSSCT00000005124, ENSSSCT00000054894, ENSSSCT00000062423, XM_021095634, XM_021095641, XM_021095647, XM_021095657	1:121306032-121376122:-1	ubiquitin specific peptidase 8	Cluster001
USP9X	84	ENSSSCG00000012251	ENSSSCT00000013397, ENSSSCT00000039814, ENSSSCT00000054956, ENSSSCT00000062541, XM_021080147, XM_021080148, XM_021080149, XM_021080150, XM_021080151, XM_021080152	X:36760774-36885294:+1	ubiquitin specific peptidase 9, X-linked	Cluster001
USPL1	337	ENSSSCG00000028065	ENSSSCT00000027994, XM_021065545, XM_021065547, XM_021065548	11:7321187-7361569:+1	ubiquitin specific peptidase like 1	Cluster001
UTP20	34	ENSSSCG00000000869	ENSSSCT00000000949	5:82813701-82913162:-1	UTP20, small subunit processome component	Cluster001
UTP4	211	ENSSSCG00000028638	ENSSSCT00000029669, ENSSSCT00000060848, XM_021093876	6:17782199-17818173:-1	UTP4, small subunit processome component	Cluster001
VAC14	23	.	XM_021093808	.	Vac14, PIKFYVE complex component	Cluster001
VAMP4	648	ENSSSCG00000015482	ENSSSCT00000016865, ENSSSCT00000038558, ENSSSCT00000057061, ENSSSCT00000058084, XM_013977625, XM_021102024	9:114138359-114202329:-1	vesicle associated membrane protein 4	Cluster001
VANGL1	1	ENSSSCG00000006746	ENSSSCT00000007391, ENSSSCT00000057741, XM_013997257	4:104996073-105049746:-1	VANGL planar cell polarity protein 1	Cluster001
VANGL2	349	ENSSSCG00000006383	ENSSSCT00000006996, ENSSSCT00000042013, XM_005663204	4:90051204-90080747:-1	VANGL planar cell polarity protein 2	Cluster001
VAPA	327	ENSSSCG00000038465	ENSSSCT00000049156, ENSSSCT00000061774, XM_021096053, XM_021096054, XM_021096055	6:98207590-98254266:-1	VAMP associated protein A	Cluster001
VAV2	486	ENSSSCG00000005743	ENSSSCT00000006315, ENSSSCT00000044450, ENSSSCT00000048675, XM_005654613, XM_005654614, XM_005654617, XM_013987084, XM_021071347, XM_021071356, XM_021071364, XM_021071367, XM_021071375, XM_021071384	1:273303144-273476293:-1	vav guanine nucleotide exchange factor 2	Cluster001
VBP1	437	.	XM_005674019	.	VHL binding protein 1	Cluster001
VCAN	41	ENSSSCG00000014136	ENSSSCT00000015439, ENSSSCT00000015440, ENSSSCT00000028327, ENSSSCT00000031327, ENSSSCT00000032588, ENSSSCT00000033299, ENSSSCT00000035607, ENSSSCT00000043338, ENSSSCT00000052212, XM_005661535, XM_021081073	2:91287931-91811674:+1	versican	Cluster001
VEGFC	214	ENSSSCG00000015770	ENSSSCT00000017171, XM_021076037, XM_021076039	15:39039311-39133142:-1	vascular endothelial growth factor C	Cluster001
VEZF1	225	ENSSSCG00000017623	ENSSSCT00000019185, ENSSSCT00000024255, ENSSSCT00000024902, ENSSSCT00000026795, XM_003483033, XM_021067259, XM_021067262, XM_021067263, XM_021067264, XM_021067266, XM_021067269, XM_021067270	12:34245891-34263527:-1	vascular endothelial zinc finger 1	Cluster001
VEZT	276	ENSSSCG00000000900	ENSSSCT00000000984, ENSSSCT00000028334, XM_003126713, XM_013998065, XM_013998066, XM_013998068, XM_013998069, XM_021092746, XM_021092747, XM_021092748, XM_021092749, XM_021092750	5:88035642-88104742:-1	vezatin, adherens junctions transmembrane protein	Cluster001
VHL	757	.	XM_003483214	.	von Hippel-Lindau tumor suppressor	Cluster001
VIRMA	106	ENSSSCG00000006100	ENSSSCT00000006691, ENSSSCT00000045445, ENSSSCT00000065864	4:42162338-42237427:+1	vir like m6A methyltransferase associated	Cluster001
VPS13B	100	ENSSSCG00000006071	ENSSSCT00000006662, ENSSSCT00000045194, ENSSSCT00000053310, XM_021090606, XM_021090607, XM_021090611, XM_021090613, XM_021090614, XM_021090615	4:37091454-37819717:-1	vacuolar protein sorting 13 homolog B	Cluster001
VPS13C	115	ENSSSCG00000036431	ENSSSCT00000053839, ENSSSCT00000061270, ENSSSCT00000062985, XM_021094362, XM_021094370, XM_021094373	1:109931251-110104257:+1	vacuolar protein sorting 13 homolog C	Cluster001
VPS13D	104	ENSSSCG00000003438	ENSSSCT00000003816, ENSSSCT00000039196, ENSSSCT00000045404, ENSSSCT00000062913, ENSSSCT00000064371, XM_021095374, XM_021095375, XM_021095376, XM_021095377, XM_021095378, XM_021095380, XM_021095381	6:72256822-72510188:+1	vacuolar protein sorting 13 homolog D	Cluster001
VPS26A	72	ENSSSCG00000010250	ENSSSCT00000011220, ENSSSCT00000054434, XM_001925999, XM_005657390, XM_021073762	14:72210483-72241657:+1	VPS26, retromer complex component A	Cluster001
VPS29	3	ENSSSCG00000009823	ENSSSCT00000010766, ENSSSCT00000063025, XM_003483426	14:31855828-31869576:-1	VPS29, retromer complex component	Cluster001
VPS33B	61	.	XM_021098980, XM_021098981, XM_021098982, XM_021098983, XM_021098984	.	VPS33B, late endosome and lysosome associated	Cluster001
VPS41	87	ENSSSCG00000016772	ENSSSCT00000018259, ENSSSCT00000058623, ENSSSCT00000061000, XM_003134906, XM_021079091	18:55301604-55466622:+1	VPS41, HOPS complex subunit	Cluster001
VPS54	112	ENSSSCG00000027509	ENSSSCT00000029984, ENSSSCT00000054111, XM_021087459, XM_021087460, XM_021087462	3:77842484-77975436:+1	VPS54, GARP complex subunit	Cluster001
VPS8	203	ENSSSCG00000011788	ENSSSCT00000012900, ENSSSCT00000024055, ENSSSCT00000041981, ENSSSCT00000050775, ENSSSCT00000058657, ENSSSCT00000064248, XM_021069973, XM_021069974, XM_021069975, XM_021069976, XM_021069977	13:122615226-122951656:+1	VPS8, CORVET complex subunit	Cluster001
VTA1	400	ENSSSCG00000004140	ENSSSCT00000004575, ENSSSCT00000065783, XM_021087275, XM_021087276	1:22861450-22923980:-1	vesicle trafficking 1	Cluster001
WAC	457	ENSSSCG00000011013	ENSSSCT00000012055, ENSSSCT00000024775, ENSSSCT00000049530, ENSSSCT00000063562, XM_003130704, XM_013980204, XM_013980206, XM_013980207	10:39932590-40024134:+1	WW domain containing adaptor with coiled-coil	Cluster001
WAPL	162	ENSSSCG00000010357	ENSSSCT00000011339, ENSSSCT00000051558, ENSSSCT00000054933, XM_013990453, XM_021073751, XM_021073753	14:87492114-87588730:-1	WAPL cohesin release factor	Cluster001
WASF1	334	.	XM_021091081, XM_021091085, XM_021091088, XM_021091094, XM_021091100, XM_021091104, XM_021091105, XM_021091107, XM_021091110, XM_021091113	.	WAS protein family member 1	Cluster001
WASHC3	105	ENSSSCG00000036075	ENSSSCT00000048764, XM_021092677, XM_021092678	5:82155278-82239312:+1	WASH complex subunit 3	Cluster001
WBP11	108	.	XM_003481683	.	WW domain binding protein 11	Cluster001
WDR12	111	ENSSSCG00000016116	ENSSSCT00000017547, XM_003133592, XM_013984400	15:106380767-106409899:-1	WD repeat domain 12	Cluster001
WDR17	60	ENSSSCG00000015766	ENSSSCT00000017166, ENSSSCT00000017167, ENSSSCT00000039829, ENSSSCT00000047965, ENSSSCT00000051513, ENSSSCT00000061858, ENSSSCT00000065370, XM_021075873, XM_021075874, XM_021075875, XM_021075876, XM_021075878, XM_021075879, XM_021075880, XM_021075881, XM_021075882	15:38589308-38705784:+1	WD repeat domain 17	Cluster001
WDR3	243	ENSSSCG00000006727	ENSSSCT00000007369, XM_021089970	4:102841461-102878564:-1	WD repeat domain 3	Cluster001
WDR33	438	ENSSSCG00000015861	ENSSSCT00000017272, ENSSSCT00000026043, ENSSSCT00000029060, XM_021075457, XM_021075458, XM_021075459, XM_021075461, XM_021075462	15:59520038-59758210:+1	WD repeat domain 33	Cluster001
WDR35	78	ENSSSCG00000008604	ENSSSCT00000009415, ENSSSCT00000031965, ENSSSCT00000040514, ENSSSCT00000044182, ENSSSCT00000051533, XM_021087810	3:118208863-118277853:+1	WD repeat domain 35	Cluster001
WDR43	717	ENSSSCG00000008536	ENSSSCT00000009340, XM_021087672	3:110316873-110365092:-1	WD repeat domain 43	Cluster001
[truncated: 12,479 more rows]
